# Supplementary material for: Whole-Transcriptome Analysis Reveals Autophagy Is Involved in Early Senescence of zj-es Mutant Rice
Source: Front Plant Sci. 2022 Jun 3;13:899054. doi: 10.3389/fpls.2022.899054 (PMC9204060; doi:10.3389/fpls.2022.899054)
Supplement: Supplementary file 3 [file Table_8.XLSX]

## Sheet: Table S2
Table S2. Differential expression, position and putative functions of 75 predicted rice genes.
id	Position	Description	log2(ZJ22a/zj-esa)	FDR(ZJ22a/zj-esa)	log2(ZJ22b/zj-esb)	FDR(ZJ22b/zj-esb)	log2(ZJ22c/zj-esc)	FDR(ZJ22c/zj-esc)	log2(zj-esa/zj-esb)	FDR(zj-esa/zj-esb)	log2(zj-esa/zj-esc)	FDR(zj-esa/zj-esc)	log2(zj-esb/zj-esc)	FDR(zj-esb/zj-esc)	log2(ZJ22a/ZJ22b)	FDR(ZJ22a/ZJ22b)	log2(ZJ22a/ZJ22c)	FDR(ZJ22a/ZJ22c)	log2(ZJ22b/ZJ22c)	FDR(ZJ22b/ZJ22c)
Os03g0738900	chr03:30325808..30327917 (+ strand)	NPH3 domain containing protein.	-5.54432	1	-1.73697	0.367452	5.90689	1	4.32193	1	5.90689	1	1.58496	1	0.514573	1	-5.54432	1	-6.05889	1
Os03g0739500	chr03:303424768..30343128 (- strand)	Conserved hypothetical protein.	0	1	0	1	0	1	0	1	0	1	0	1	0	1	0	1	0	1
Os03g0739700	chr03:30349191..30350948 (+ strand)	Uncharacterised protein family UPF0114 domain containing protein.	0.782693	0.843146	0.983661	0.165854	2.40509	0.754974	1.11274	0.863443	1.24755	0.904138	0.134812	0.990715	0.911773	0.920249	-0.374848	0.828371	-1.28662	1
Os03g0739900	chr03:30354281..30354327(- strand)	Non-protein coding transcript.	0	1	0	1	0	1	0	1	0	1	0	1	0	1	0	1	0	1
Os03g0740200	chr03:30368953..30369657(+ strand)	Conserved hypothetical protein.	-3.73697	1	0	1	0	1	0	1	0	1	0	1	-3.73697	1	-3.73697	1	0	1
Os03g0740600	chr03:30381680..30385974 (+ strand)	Similar to Deoxyhypusine synthase	1.16046	0.993248	1.57441	0.785767	3.06111	0.374204	0.842185	0.98227	1.51362	0.418728	0.671439	0.590989	0.428237	0.996572	-0.387023	0.901572	-0.81526	1
Os03g0740600	chr03:30381881..30385901 (+ strand)	Similar to Deoxyhypusine synthase	1.16046	0.993248	1.57441	0.785767	3.06111	0.374204	0.842185	0.98227	1.51362	0.418728	0.671439	0.590989	0.428237	0.996572	-0.387023	0.901572	-0.81526	1
Os03g0740700	chr03:30386616..30391989 (+ strand)	Protein similar to CwfJ, C-terminal 2 domain containing protein.	0.942572	0.985292	1.11732	0.0631826	1.44446	0.217943	0.728887	0.742371	0.915167	0.739896	0.186279	0.993196	0.55414	0.901422	0.413277	0.909549	-0.140863	1
Os03g0740700	chr03:30386616..30391989 (+ strand)	Protein similar to CwfJ, C-terminal 2 domain containing protein.	0.942572	0.985292	1.11732	0.0631826	1.44446	0.217943	0.728887	0.742371	0.915167	0.739896	0.186279	0.993196	0.55414	0.901422	0.413277	0.909549	-0.140863	1
Os03g0740800	chr03:30395654..30398117 (+ strand)	DNA double-strand break repair and VJ recombination XRCC4, C-terminal domain containing protein.	1.9023	0.895118	3.25192	0.305264	2.1745	0.859146	0.205225	0.458001	0.00916	0.181793	-0.196065	0.889253	-1.14439	0.856587	-0.263034	0.857127	0.881356	1
Os03g0740833	chr03:30399144..30399584 (- strand)	Conserved hypothetical protein.	-0.584963	1	2.80735	0.699203	2.44478	0.78976	2.80735	0.561796	4.61471	0.0759566	1.80735	1	-0.584963	1	1.58496	1	2.16993	1
Os03g0740900	chr03:30400921..30401584(+ strand)	Non-protein coding transcript.	9.25267	0.0393701	0.655352	0.756588	0.251539	1	-1.53842	0.265815	-2.87184	0.0159026	-1.33342	1	7.05889	1	6.12928	1	-0.929611	1
Os03g0741000	chr03:30401970..30402872 (- strand)	Similar to Acyl-[acyl-carrier protein] desaturase.	0	1	0	1	0	1	0	1	0	1	0	1	0	1	0	1	0	1
Os03g0741100	chr03:30406968..30409139 (+ strand)	Basic helix-loop-helix transcription factor, Drought tolerance	0.959811	0.937708	1.75566	0.99202	1.89056	0.977303	1.39658	0.399293	1.68974	0.212503	0.293161	0.929935	0.60073	0.965619	0.758992	0.821223	0.158262	1
Os03g0741050	chr03:30403047..30405978 (+ strand)	Non-protein coding transcript.	0.06498	0.0195785	2.25023	0.0801328	1.60461	0.344749	2.22573	1.56622e-06	1.9009	0.00886379	-0.324828	0.0272468	0.0404791	0.93035	0.361266	0.995906	0.320787	0.651467
Os03g0741400	chr03:30423046..30424931 (+ strand)	Similar to SUSIBA2.	1.17688	0.882177	2.09668	0.421386	1.99309	0.741275	1.63941	0.0678835	1.58727	0.136885	-0.0521376	0.803961	0.719612	0.868374	0.771059	0.762581	0.0514468	1
Os03g0741500	chr03:30430866..30431962 (+ strand)	Similar to Cytochrome P450 family protein, expressed.	0	1	0	1	0	1	0	1	0	1	0	1	0	1	0	1	0	1
Os03g0741525	chr03:30430890..30432446 (- strand)	Hypothetical protein.	0	1	0	1	0	1	0	1	0	1	0	1	0	1	0	1	0	1
Os03g0741600	chr03:30436490..30437512 (+ strand)	Prenylated rab acceptor PRA1 family protein.	1.58791	0.848552	-0.321928	0.354929	-1.64297	0.0176562	-2.84918	0.231055	-2.91427	0.00111649	-0.065095	1	-0.939337	0.560929	0.316608	0.954379	1.25594	1
Os03g0741900	chr03:30442873..30445042 (+ strand)	Hypothetical protein.	0	1	0	1	0	1	0	1	0	1	0	1	0	1	0	1	0	1
Os03g0741700	chr03:30442119..30445041 (- strand)	Hypothetical conserved gene.	1.52356	1	3.32193	0.631042	3.11548	0.669705	1.12029	0.912246	1.17688	0.946937	0.0565835	1	-0.678072	1	-0.415037	1	0.263034	1
Os03g0742300	chr03:30451545..30452638 (+ strand)	Signal transduction response regulator, receiver region domain containing protein.	0	1	0	1	0	1	0	1	0	1	0	1	0	1	0	1	0	1
Os03g0742400	chr03:30453971..30456583(- strand)	Similar to MRS2-7	1.02006	0.922029	1.78472	0.953452	2.00405	0.793931	1.02094	0.795627	1.02152	0.95799	0.000577424	0.807836	0.256284	0.99402	0.0375356	0.969503	-0.218749	1
Os03g0742800	chr03:30476605..30479723 (+ strand)	Similar to Auxin-responsive protein IAA14 (Indoleacetic acid-induced protein 14) (SOLITARY-ROOT protein).	0.736072	0.516796	1.32903	0.303722	1.29513	0.00763123	0.597423	0.358058	0.913668	0.710901	0.316245	0.790258	0.00445965	0.964138	0.354608	0.992322	0.350148	0.761766
Os03g0742850	chr03:30478058..30478312(- strand)	Hypothetical protein.	0	1	0	1	0	1	0	1	0	1	0	1	0	1	0	1	0	1
Os03g0742800	chr03:30476605..30479723 (+ strand)	Similar to Auxin-responsive protein IAA14 (Indoleacetic acid-induced protein 14)	0.736072	0.516796	1.32903	0.303722	1.29513	0.00763123	0.597423	0.358058	0.913668	0.710901	0.316245	0.790258	0.00445965	0.964138	0.354608	0.992322	0.350148	0.761766
Os03g0742900	chr03:30481014..30481356 (- strand)	Similar to cDNA clone:006-206-C11, full insert sequence.	3.16993	0.502047	1.41504	0.845547	1.58496	0.929617	-1.58496	0.0172231	-1.31194	0.00949377	0.273018	1	0.169925	1	0.273018	1	0.103093	1
Os03g0742900	chr03:30481014..30483129 (- strand)	Auxin/indole-3-acetic acid protein, Control of aerenchyma and lateral root development	3.16993	0.502047	1.41504	0.845547	1.58496	0.929617	-1.58496	0.0172231	-1.31194	0.00949377	0.273018	1	0.169925	1	0.273018	1	0.103093	1
Os03g0743200	chr03:30502713..30504518 (+ strand)	Hypothetical conserved gene.	1.26704	0.701947	1.27737	0.509889	1.33832	0.187012	0.543064	0.572418	0.971751	0.867932	0.428687	0.824429	0.532733	0.948245	0.900464	0.57964	0.367732	1
Os03g0743400	chr03:30514214..30516272 (+ strand)	Similar to H2A protein.	0.56257	0.445723	1.99316	0.809212	1.70365	0.712045	1.36981	0.3431	1.17867	0.794538	-0.191131	0.501745	-0.0607796	0.966753	0.0375968	0.867639	0.0983764	1
Os03g0743500	chr03:30518752..30518964 (+ strand)	Calcium-binding EF-hand domain containing protein.	2.77837	0.0609099	2.69991	0.19302	2.87854	0.0547439	1.33886	0.417365	1.50375	0.289903	0.164889	0.973825	1.41732	0.600482	1.40358	0.458182	-0.0137401	1
Os03g0743500	chr03:30517655..30519382 (+ strand)	Similar to Calmodulin 1 (Fragment).	2.77837	0.0609099	2.69991	0.19302	2.87854	0.0547439	1.33886	0.417365	1.50375	0.289903	0.164889	0.973825	1.41732	0.600482	1.40358	0.458182	-0.0137401	1
Os03g0743650	chr03:30520081..30520428 (- strand)	Conserved hypothetical protein.	1.77278	0.257286	1.58368	0.670054	1.51742	0.184798	0.0938525	0.0301335	0.108776	0.00633538	0.0149238	0.77884	0.282955	0.996572	0.364132	0.994436	0.0811769	1
Os03g0743800	chr03:30523073..30531098 (+ strand)	Similar to predicted protein.	3.32193	1	4.73697	0.344209	4.32193	1	1.41504	0.755577	1	0.943309	-0.415037	1	0	1	0	1	0	1
Os03g0743900	chr03:30532361..30535278 (- strand)	Similar to ATP sulfurylase.	1.10211	0.991738	1.334	0.314647	1.77877	0.889214	0.268371	0.0471174	0.62711	0.149287	0.35874	0.786186	0.0364839	0.965619	-0.0495468	0.763926	-0.0860307	1
Os03g0744100	chr03:30544715..30545182 (- strand)	Similar to SKIP interacting protein 16.	-0.736966	1	5.1964	1	-1.24793	0.538764	0.874469	1	0.415037	1	-0.459432	1	-5.05889	1	0.925999	1	5.98489	1
Os03g0744200	chr03:30544600..30544848 (+ strand)	Hypothetical protein.	2.37851	0.836395	2.9145	0.41524	10.9464	0.000111257	2.60638	0.345635	2.92405	0.301198	0.31767	0.973825	2.07039	1	-5.64386	1	-7.71425	1
Os03g0744300	chr03:30549561..30549897 (- strand)	Similar to Protein kinase domain containing protein, expressed.	0.629516	0.974702	1.2553	0.596939	1.54483	0.895051	0.507413	0.108616	0.726726	0.117137	0.219313	0.926337	-0.118374	0.93035	-0.188592	0.782324	-0.070218	1
Os03g0744300	chr03:30549561..30553087 (+ strand)	Protein kinase, core domain containing protein.	0.629516	0.974702	1.2553	0.596939	1.54483	0.895051	0.507413	0.108616	0.726726	0.117137	0.219313	0.926337	-0.118374	0.93035	-0.188592	0.782324	-0.070218	1
Os03g0744501	chr03:30558982..30559305 (+ strand)	Conserved hypothetical protein.	0	1	0	1	4.05889	1	0	1	4.05889	1	4.05889	1	0	1	0	1	0	1
Os03g0744600	chr03:30561105..30563604 (- strand)	Similar to Ripening-associated protein (Fragment).	1.13188	0.881356	2.50633	4.03739e-09	2.34737	0.0595266	1.41257	0.00989191	1.33062	0.358205	-0.0819531	0.509136	0.0381219	0.901422	0.115126	0.811255	0.0770043	0.98139
Os03g0744650	chr03:30565182..30566267 (- strand)	Similar to predicted protein.	1.16752	0.820849	2.78576	0.00311151	2.67541	0.0932162	1.20465	0.412794	1.45943	0.320223	0.254782	0.960558	-0.413594	0.881163	-0.0484615	0.922021	0.365133	1
Os03g0744675	chr03:30574560..30582044 (- strand)	Similar to WD-40 repeat family protein / beige-related.	2.85798	0.418386	2.65281	0.816906	4.44708	0.0924401	3.28668	1.18566e-05	3.5891	5.16628e-07	0.302425	0.927667	3.49185	0.903585	2	1	-1.49185	1
Os03g0744700	chr03:30594374..30595862 (+ strand)	Conserved hypothetical protein.	-0.665105	2.65775e-05	0.0986099	8.9301e-42	-0.00738041	3.42897e-17	1.07207	0.643218	1.15767	0.807165	0.0856035	0.926337	0.308355	0.99402	0.499949	0.985749	0.191594	0.711497
Os03g0744800	chr03:30596742..30599368 (- strand)	emp24/gp25L/p24 family protein.	0.846393	0.520943	2.0264	0.93338	2.14777	0.686401	0.673652	0.805428	1.15577	0.784957	0.482117	0.541525	-0.506353	0.579833	-0.145605	0.636174	0.360747	1
Os03g0744800	chr03:30599102..30599368 (- strand)	Similar to emp24/gp25L/p24 protein-related.	0.846393	0.520943	2.0264	0.93338	2.14777	0.686401	0.673652	0.805428	1.15577	0.784957	0.482117	0.541525	-0.506353	0.579833	-0.145605	0.636174	0.360747	1
Os03g0745000	chr03:30606031..30606371(- strand)	Similar to Heat stress transcription factor A-2a.	0	1	0	1	4.05889	1	0	1	4.05889	1	4.05889	1	0	1	0	1	0	1
Os03g0745000	chr03:30609984..30611495(- strand)	Similar to cytokinin-O-glucosyltransferase 1	0	1	0	1	4.05889	1	0	1	4.05889	1	4.05889	1	0	1	0	1	0	1
Os03g0745100	chr03:30606069..30606473(- strand)	Similar to Heat stress transcription factor A-2a.	5.32193	1	8.67948	0.0785781	9.43741	0.0154252	3.35755	0.252347	4.11548	0.0606686	0.757925	0.84868	0	1	0	1	0	1
Os03g0745400	chr03:30626687..30627148 (+ strand)	Conserved hypothetical protein.	0.459195	0.0663575	0.667141	9.30705e-14	0.921301	6.05671e-09	0.302636	0.0880032	0.31987	0.00366183	0.0172336	0.525691	0.09469	0.906552	-0.142237	0.228494	-0.236927	0.313294
Os03g0745400	chr03:30626693..30629545 (+ strand)	Hypothetical conserved gene.	0.459195	0.0663575	0.667141	9.30705e-14	0.921301	6.05671e-09	0.302636	0.0880032	0.31987	0.00366183	0.0172336	0.525691	0.09469	0.906552	-0.142237	0.228494	-0.236927	0.313294
Os03g0745550	chr03:30633964..30635570 (+ strand)	Conserved hypothetical protein.	-0.74048	0.442906	1.81486	0.925041	1.37158	0.123827	3.1403	0.0603261	3.57245	0.027477	0.432146	0.703838	0.584963	0.943748	1.46039	0.27317	0.875426	1
Os03g0745600	chr03:30639120..30639966 (+ strand)	Uncharacterised protein family UPF0005 domain containing protein.	0.884523	0.793779	1.1822	0.640546	1.76275	0.938412	0.712718	0.91961	1.52356	0.669863	0.810844	0.749254	0.415037	0.99402	0.645335	0.971267	0.230298	1
Os03g0745700	chr03:30641590..30644916 (+ strand)	Similar to ATP binding protein.	0	1	0	1	0	1	0	1	0	1	0	1	0	1	0	1	0	1
Os03g0746000	chr03:30659480..30660016 (+ strand)	Hypothetical protein.	2.90689	1	0.5025	0.68126	-0.201634	0.327295	0.180572	0.821596	0.415037	0.772733	0.234465	1	2.58496	1	3.52356	1	0.938599	1
Os03g0746000	chr03:30659480..30660016 (+ strand)	Hypothetical protein.	2.90689	1	0.5025	0.68126	-0.201634	0.327295	0.180572	0.821596	0.415037	0.772733	0.234465	1	2.58496	1	3.52356	1	0.938599	1
Os03g0746400	chr03:30677220..30679061 (+ strand)	Pentatricopeptide repeat domain containing protein.	0.581499	0.623549	1.56524	0.741049	1.72859	0.835803	1.06774	0.522215	1.25376	0.444909	0.186012	0.995724	0.083999	0.996572	0.106668	0.975666	0.0226691	1
Os03g0746400	chr03:30677397..30678494 (+ strand)	Hypothetical conserved gene.	0.581499	0.623549	1.56524	0.741049	1.72859	0.835803	1.06774	0.522215	1.25376	0.444909	0.186012	0.995724	0.083999	0.996572	0.106668	0.975666	0.0226691	1
Os03g0746500	chr03:30680167..30689037(- strand)	NTP-dependent DNA/RNA helicase, Salinity stress tolerance	1.47237	0.82333	1.16026	0.83914	1.80735	0.562219	0.40917	0.434701	1.09516	0.895218	0.685987	0.298968	0.721284	0.966724	0.760173	0.999281	0.038889	1
Os03g0746500	chr03:30684690..30687347 (- strand)	Similar to predicted protein.	1.47237	0.82333	1.16026	0.83914	1.80735	0.562219	0.40917	0.434701	1.09516	0.895218	0.685987	0.298968	0.721284	0.966724	0.760173	0.999281	0.038889	1
Os03g0746600	chr03:30689626..30692157 (+ strand)	WD40 repeat-like domain containing protein.	-0.788496	0.101257	1.61633	0.872786	2.89308	0.146195	2.34276	0.0962512	2.72643	0.0250221	0.383673	0.93487	-0.062061	0.993233	-0.955146	0.532916	-0.893085	1
Os03g0746700	chr03:30694637..30695479 (- strand)	Conserved hypothetical protein.	-2.3574	5.38008e-09	1.94566	0.665409	2.61537	0.000507231	4.1749	5.10439e-13	4.81421	3.35012e-19	0.639305	0.19465	-0.12815	0.827462	-0.158552	0.512951	-0.0304027	1
Os03g0746800	chr03:30701558..30704571 (- strand)	WD-40 repeat containing protein.	4.75327	0.000534957	3.3193	0.00160566	3.54013	0.000229052	0.303001	0.249535	0.742467	0.35932	0.439466	0.833449	1.73697	0.895126	1.95561	0.719576	0.21864	1
Os03g0746900	chr03:30708026..30708436 (+ strand)	Protein of unknown function DUF1677, plant family protein.	0.250271	0.10183	-0.390113	1.42608e-07	-3.49564	3.6055e-37	-1.33699	1.47593e-06	-4.2199	2.74793e-28	-2.88291	6.69522e-07	-0.696608	0.0952058	-0.473986	0.148411	0.222622	1
Os03g0747100	chr03:30723352..30725365 (+ strand)	ERG2/sigma1 receptor-like domain containing protein.	-0.774933	0.133499	-2.5025	0.271788	-0.192645	1	-3.90689	0.0299304	-2.6845	0.0474052	1.22239	1	-2.17932	0.668543	-3.26679	0.134682	-1.08746	1
Os03g0747200	chr03:30727166..30731434(- strand)	Protein of unknown function DUF1423, plant domain containing protein.	-2.1375	0.387493	1.48493	0.873418	4.40656	0.146816	4.87036	0.0018848	4.66959	0.0195931	-0.200771	0.889068	1.24793	0.98247	-1.87447	0.753819	-3.1224	1
Os03g0747300	chr03:30736587..30739809 (+ strand)	Protein of unknown function DUF124 family protein.	1.62895	0.0779502	1.83523	0.760887	2.10966	0.212058	0.72645	0.642506	0.706215	0.165648	-0.0202351	0.575592	0.520171	0.774019	0.225505	0.984375	-0.294666	0.43209
Os03g0747400	chr03:30740904..30741767(- strand)	Similar to Seed maturation protein.	0	1	0	1	0	1	0	1	0	1	0	1	0	1	0	1	0	1
Os03g0747500	chr03:30743225..30743960(- strand)	Seed maturation protein domain containing protein.	0	1	0	1	0	1	0	1	0	1	0	1	0	1	0	1	0	1
Os03g0747600	chr03:30747819..30749218 (+ strand)	Similar to Acetyltransferase, GNAT family protein, expressed.	0.471663	0.174897	1.84453	0.746989	1.85429	0.951219	1.2358	0.185398	1.40854	0.145453	0.17274	0.990473	-0.137068	0.8268	0.0259174	0.780795	0.162985	1
Os03g0747600	chr03:30749031..30755128 (+ strand)	Similar to Acetyltransferase, GNAT family protein, expressed.	0.471663	0.174897	1.84453	0.746989	1.85429	0.951219	1.2358	0.185398	1.40854	0.145453	0.17274	0.990473	-0.137068	0.8268	0.0259174	0.780795	0.162985	1
Os03g0747700	chr03:30755978..30757356(- strand)	Similar to photosystem II 11 kDa protein-related.	2.21883	0.581561	4.87283	0.0230611	1.57766	0.846198	1.11794	0.845873	0.545236	0.610685	-0.572705	0.58635	-1.53605	1	1.18641	1	2.72247	1
Os03g0747850	chr03:30761570..30761899 (- strand)	Hypothetical gene.	0	1	0	1	0	1	0	1	0	1	0	1	0	1	0	1	0	1
Os03g0747800	chr03:30760673..30763431 (+ strand)	O-acetylserine(thiol) lyase, Cysteine synthase, Cysteine biosynthesis, Arsenic detoxification	2.4601	0.706179	3.90366	1.36182e-18	3.60557	0.000439383	1.42143	0.0358251	1.4152	0.17368	-0.00622443	0.758855	-0.022139	0.99402	0.269732	0.986961	0.291871	1
Os03g0747900	chr03:30764588..30772974 (+ strand)	Similar to Myosin heavy chain class XI E1 protein.	0.706269	0.817451	3.61891	0.00224316	3.82103	0.00107712	2.47207	0.00224342	2.77372	0.000256977	0.301656	0.927667	-0.440573	0.960022	-0.341037	0.881945	0.0995357	1

## Sheet: Table S3
Table S3. Identified SNPs and Indels in the sequences of 75 predicted rice genes between ZJ22 and zj-es1."0"represents the reference base; "1" represents the mutation base; "." represents that the relevant genotype is not detected at this locus or the genotype is uncertain.
structure_gene	start	end	ref	mut	variation_type	database	quality	zj-esa1_type	zj-esa2_type	zj-esa3_type	zj-esb1_type	zj-esb2_type	zj-esb3_type	zj-esc1_type	zj-esc2_type	zj-esc3_type	ZJ22a1_type	ZJ22a2_type	ZJ22a3_type	ZJ22b1_type	ZJ22b2_type	ZJ22b3_type	ZJ22c1_type	ZJ22c2_type	ZJ22c3_type	zj-esa1_read	zj-esa2_read	zj-esa3_read	zj-esb1_read	zj-esb2_read	zj-esb3_read	zj-esc1_read	zj-esc2_read	zj-esc3_read	ZJ22a1_read	ZJ22a2_read	ZJ22a3_read	ZJ22b1_read	ZJ22b2_read	ZJ22b3_read	ZJ22c1_read	ZJ22c2_read	ZJ22c3_read	structure_type	function_type	function_gene
Os03g0738900	30326464	30326464	C	T	SNP	.	63	0|0	.|.	0|0	0|0	0|0	.|.	.|.	0|0	.|.	0|0	.|.	0|0	0|0	0|0	0|0	0|1	0|0	0|0	6,0	0,0	1,0	1,0	2,0	0,0	0,0	5,0	0,0	1,0	0,0	5,0	6,0	7,0	7,0	1,2	5,0	3,0	exonic	nonsynonymous SNV	Os03g0738900:Os03t0738900-00:exon2:c.C518T:p.A173V,
Os03g0738900	30326870	30326870	G	C	SNP	.	52	0|0	0|0	0|0	0|0	0|0	0|0	0|0	.|.	.|.	0|0	0|0	0|0	0|0	0|0	0|0	0|0	0|1	0|0	2,0	3,0	6,0	4,0	8,0	7,0	1,0	0,0	0,0	14,0	12,0	15,0	8,0	7,0	4,0	14,0	5,4	3,0	exonic	synonymous SNV	Os03g0738900:Os03t0738900-00:exon2:c.G924C:p.L308L,
Os03g0738900	30327313	30327313	T	G	SNP	.	89	0|0	0|0	0|1	0|0	0|0	0|0	.|.	.|.	0|0	0|0	0|0	0|0	0|0	0|0	0|0	0|0	0|0	0|0	19,0	5,0	6,7	6,0	4,0	4,0	0,0	0,0	4,0	13,0	2,0	3,0	6,0	10,0	5,0	12,0	9,0	6,0	exonic	nonsynonymous SNV	Os03g0738900:Os03t0738900-00:exon2:c.T1367G:p.L456R,
Os03g0738900	30327844	30327844	G	C	SNP	.	36.9055	0|0	0|0	0|0	0|0	0|0	0|1	0|0	0|0	0|0	0|0	0|0	0|0	0|0	0|0	0|0	0|0	0|0	0|0	11,0	3,0	5,0	7,0	15,0	10,4	8,0	11,0	15,0	25,0	35,0	19,0	18,0	15,0	14,0	17,0	15,0	13,0	exonic	nonsynonymous SNV	Os03g0738900:Os03t0738900-00:exon2:c.G1898C:p.S633T,
Os03g0739500	30342363	30342363	T	C	SNP	.	106	.|.	.|.	.|.	.|.	.|.	.|.	.|.	.|.	.|.	.|.	.|.	1|1	.|.	.|.	.|.	.|.	.|.	.|.	0,0	0,0	0,0	0,0	0,0	0,0	0,0	0,0	0,0	0,0	0,0	0,5	0,0	0,0	0,0	0,0	0,0	0,0	downstream	-	-
Os03g0739500(dist=1511),Os03g0739700(dist=4552)	30344639	30344639	A	G	SNP	.	43.5918	.|.	.|.	.|.	.|.	.|.	.|.	.|.	.|.	.|.	.|.	.|.	.|.	.|.	.|.	1|1	.|.	.|.	.|.	0,0	0,0	0,0	0,0	0,0	0,0	0,0	0,0	0,0	0,0	0,0	0,0	0,0	0,0	0,2	0,0	0,0	0,0	intergenic	-	-
Os03g0739500(dist=1511),Os03g0739700(dist=4552)	30344639	30344639	A	G	SNP	.	43.5918	.|.	.|.	.|.	.|.	.|.	.|.	.|.	.|.	.|.	.|.	.|.	.|.	.|.	.|.	1|1	.|.	.|.	.|.	0,0	0,0	0,0	0,0	0,0	0,0	0,0	0,0	0,0	0,0	0,0	0,0	0,0	0,0	0,2	0,0	0,0	0,0	intergenic	-	-
Os03g0739700	30349381	30349381	T	C	SNP	.	127	0|0	.|.	.|.	.|.	0|0	0|0	0|0	0|0	1|1	0|0	.|.	0|0	0|0	0|0	0|0	0|0	0|0	0|0	1,0	0,0	0,0	0,0	2,0	2,0	1,0	2,0	0,11	10,0	0,0	11,0	2,0	4,0	4,0	10,0	2,0	1,0	exonic	nonsynonymous SNV	Os03g0739700:Os03t0739700-01:exon1:c.T134C:p.V45A,
Os03g0739700	30349457	30349457	G	C	SNP	.	202	0|0	.|.	.|.	.|.	0|0	0|0	0|0	0|0	1|1	0|0	.|.	0|0	0|0	0|0	0|0	0|0	0|0	0|0	2,0	0,0	0,0	0,0	2,0	2,0	1,0	4,0	0,11	10,0	0,0	8,0	3,0	2,0	5,0	9,0	3,0	1,0	exonic	synonymous SNV	Os03g0739700:Os03t0739700-01:exon1:c.G210C:p.S70S,
Os03g0739700	30349543	30349543	T	C	SNP	.	127	0|0	.|.	.|.	.|.	0|0	0|0	.|.	0|0	1|1	.|.	.|.	0|0	0|0	0|0	0|0	0|0	0|0	0|0	2,0	0,0	0,0	0,0	2,0	2,0	0,0	2,0	0,11	0,0	0,0	10,0	5,0	6,0	1,0	9,0	1,0	1,0	exonic	nonsynonymous SNV	Os03g0739700:Os03t0739700-01:exon1:c.T296C:p.L99P,
Os03g0739700	30350274	30350274	G	A	SNP	.	25.2465	0|0	0|0	0|0	0|0	0|0	0|0	0|1	0|1	.|.	0|0	0|0	0|0	0|0	0|0	0|0	0|0	0|0	0|0	13,0	6,0	12,0	17,0	26,0	10,0	2,1	5,2	0,0	17,0	2,0	25,0	20,0	31,0	37,0	79,0	14,0	20,0	exonic	nonsynonymous SNV	Os03g0739700:Os03t0739700-01:exon4:c.G668A:p.G223D,
Os03g0739700	30351047	30351047	T	C	SNP	.	21.297	0|1	.|.	0|0	.|.	0|0	.|.	0|0	0|0	.|.	.|.	.|.	.|.	0|0	.|.	0|0	0|0	0|0	0|0	0,1	0,0	3,0	0,0	1,0	0,0	1,0	2,0	0,0	0,0	0,0	0,0	1,0	0,0	1,0	6,0	1,0	2,0	downstream	-	-
Os03g0740600	30382155	30382155	C	T	SNP	.	156	0|0	0|1	0|0	0|0	0|0	0|0	0|0	0|0	0|0	0|0	0|0	0|0	0|0	0|0	0|0	0|0	0|0	0|0	11,0	5,8	4,0	6,0	16,0	7,0	27,0	12,0	31,0	28,0	35,0	16,0	20,0	24,0	23,0	53,0	46,0	43,0	exonic	synonymous SNV	Os03g0740600:Os03t0740600-02:exon1:c.C195T:p.N65N,Os03g0740600:Os03t0740600-01:exon1:c.C195T:p.N65N,
Os03g0740600	30383072	30383075	TAAT	-	Deletion	.	20.7944	.|.	.|.	.|.	0|1	0|0	.|.	.|.	.|.	.|.	0|0	0|0	0|0	0|0	.|.	0|0	.|.	.|.	0|0	0,0	0,0	0,0	0,1	4,0	0,0	0,0	0,0	0,0	4,0	1,0	2,0	5,0	0,0	3,0	0,0	0,0	4,0	intronic	-	-
Os03g0740600(Os03t0740600-01:c.*30C>T,Os03t0740600-02:c.*30C>T)	30385553	30385553	C	T	SNP	.	42.2831	0|0	0|1	0|0	0|0	0|0	0|0	0|0	0|0	0|0	0|0	0|0	0|0	0|0	0|0	0|0	0|0	0|0	0|0	15,0	0,3	20,0	6,0	16,0	23,0	19,0	8,0	17,0	30,0	27,0	25,0	33,0	47,0	36,0	53,0	49,0	47,0	UTR3	-	-
Os03g0740600(Os03t0740600-01:c.*224C>T,Os03t0740600-02:c.*322C>T)	30385845	30385845	C	T	SNP	.	24.9185	0|0	.|.	0|0	0|0	0|0	0|0	.|.	0|0	.|.	0|0	0|0	0|0	0|0	0|1	0|0	0|0	0|0	0|0	15,0	0,0	7,0	5,0	4,0	7,0	0,0	4,0	0,0	8,0	3,0	11,0	3,0	13,2	10,0	11,0	11,0	9,0	UTR3	-	-
Os03g0740700	30387124	30387124	A	G	SNP	.	111	.|.	.|.	.|.	1|1	.|.	.|.	.|.	.|.	.|.	.|.	1|1	1|1	.|.	.|.	.|.	.|.	.|.	.|.	0,0	0,0	0,0	0,1	0,0	0,0	0,0	0,0	0,0	0,0	0,1	0,1	0,0	0,0	0,0	0,0	0,0	0,0	exonic	nonsynonymous SNV	Os03g0740700:Os03t0740700-01:exon1:c.A356G:p.N119S,
Os03g0740700	30389854	30389854	G	T	SNP	.	99	0|0	.|.	.|.	.|.	.|.	0|0	.|.	.|.	.|.	0|0	0|0	0|0	0|1	0|0	0|0	0|0	0|0	0|0	2,0	0,0	0,0	0,0	0,0	1,0	0,0	0,0	0,0	9,0	3,0	5,0	2,3	8,0	6,0	8,0	5,0	5,0	intronic	-	-
Os03g0740700	30390856	30390856	A	G	SNP	.	51	0|0	.|.	0|0	0|0	0|0	.|.	.|.	.|.	0|0	0|0	0|0	0|0	0|0	0|0	0|0	0|0	0|1	0|0	2,0	0,0	2,0	3,0	1,0	0,0	0,0	0,0	6,0	10,0	7,0	4,0	6,0	4,0	4,0	5,0	5,2	3,0	exonic	nonsynonymous SNV	Os03g0740700:Os03t0740700-01:exon6:c.A1568G:p.E523G,
Os03g0740800	30395732	30395732	G	A	SNP	.	66	0|0	.|.	0|0	0|0	0|0	.|.	.|.	0|0	.|.	0|0	0|1	0|0	0|0	0|0	0|0	0|0	0|0	0|0	1,0	0,0	2,0	1,0	1,0	0,0	0,0	2,0	0,0	8,0	0,2	1,0	6,0	1,0	4,0	2,0	7,0	4,0	exonic	nonsynonymous SNV	Os03g0740800:Os03t0740800-01:exon1:c.G16A:p.A6T,
Os03g0740800	30395849	30395849	G	C	SNP	.	54	0|0	0|0	0|0	0|0	0|0	.|.	0|1	0|0	.|.	0|0	0|0	0|0	0|0	0|0	0|0	0|0	0|0	0|0	4,0	1,0	1,0	1,0	1,0	0,0	4,2	6,0	0,0	15,0	13,0	10,0	13,0	10,0	2,0	5,0	8,0	5,0	exonic	nonsynonymous SNV	Os03g0740800:Os03t0740800-01:exon1:c.G133C:p.V45L,
Os03g0740800	30398038	30398038	G	A	SNP	.	38.386	.|.	.|.	.|.	.|.	.|.	.|.	.|.	.|.	.|.	0|0	.|.	0|0	0|0	0|0	0|0	0|0	0|1	.|.	0,0	0,0	0,0	0,0	0,0	0,0	0,0	0,0	0,0	8,0	0,0	2,0	2,0	4,0	5,0	3,0	3,2	0,0	exonic	nonsynonymous SNV	Os03g0740800:Os03t0740800-01:exon4:c.G746A:p.G249D,
Os03g0740800(Os03t0740800-01:c.*10C>T),Os03g0740833(Os03t0740833-01:c.*1023G>A)	30398124	30398124	C	T	SNP	.	22.9394	.|.	.|.	.|.	.|.	0|0	.|.	.|.	.|.	.|.	.|.	.|.	0|0	0|1	.|.	0|0	0|0	0|0	0|0	0,0	0,0	0,0	0,0	1,0	0,0	0,0	0,0	0,0	0,0	0,0	4,0	0,1	0,0	2,0	2,0	1,0	1,0	UTR3	-	-
Os03g0740800(Os03t0740800-01:c.*10C>T),Os03g0740833(Os03t0740833-01:c.*1023G>A)	30398124	30398124	C	T	SNP	.	22.9394	.|.	.|.	.|.	.|.	0|0	.|.	.|.	.|.	.|.	.|.	.|.	0|0	0|1	.|.	0|0	0|0	0|0	0|0	0,0	0,0	0,0	0,0	1,0	0,0	0,0	0,0	0,0	0,0	0,0	4,0	0,1	0,0	2,0	2,0	1,0	1,0	UTR3	-	-
Os03g0740833	30399465	30399465	T	G	SNP	.	21.4191	0|0	0|0	0|0	0|0	0|0	0|0	0|0	0|0	.|.	0|0	0|1	0|0	0|0	0|0	0|0	0|0	0|0	0|0	4,0	4,0	1,0	4,0	5,0	6,0	4,0	2,0	0,0	2,0	0,2	2,0	14,0	2,0	6,0	15,0	4,0	1,0	exonic	synonymous SNV	Os03g0740833:Os03t0740833-01:exon1:c.A120C:p.P40P,
Os03g0740833	30399563	30399563	T	C	SNP	.	43.0769	0|0	.|.	0|0	0|0	0|1	0|0	.|.	0|0	.|.	0|0	.|.	0|0	0|0	0|0	0|0	0|0	0|0	.|.	1,0	0,0	1,0	1,0	1,3	7,0	0,0	2,0	0,0	3,0	0,0	1,0	10,0	4,0	5,0	11,0	4,0	0,0	exonic	nonsynonymous SNV	Os03g0740833:Os03t0740833-01:exon1:c.A22G:p.K8E,
Os03g0740833;Os03g0740900,Os03g0741000	30401820	30401820	T	C	SNP	.	69	0|0	.|.	.|.	0|0	.|.	.|.	0|0	.|.	.|.	.|.	.|.	.|.	0|1	0|0	0|0	0|0	0|0	0|0	1,0	0,0	0,0	1,0	0,0	0,0	2,0	0,0	0,0	0,0	0,0	0,0	0,2	1,0	1,0	6,0	1,0	5,0	upstream;downstream	-	-
Os03g0740833;Os03g0740900,Os03g0741000	30401944	30401958	tctctctctctctct	-	Deletion	.	330	1|1	.|.	.|.	.|.	.|.	.|.	0|1	.|.	.|.	.|.	.|.	.|.	.|.	.|.	1|1	0|1	1|1	0|1	0,1	0,0	0,0	0,0	0,0	0,0	2,0	0,0	0,0	0,0	0,0	0,0	0,0	0,0	0,2	6,3	0,1	2,3	upstream;downstream	-	-
Os03g0740833;Os03g0740900,Os03g0741000	30401956	30401956	t	-	Deletion	.	107	1|1	.|.	.|.	.|.	.|.	.|.	.|.	.|.	.|.	.|.	.|.	.|.	.|.	.|.	1|1	1|1	1|1	0|1	0,1	0,0	0,0	0,0	0,0	0,0	0,0	0,0	0,0	0,0	0,0	0,0	0,0	0,0	1,1	0,3	0,1	3,2	upstream;downstream	-	-
Os03g0740833;Os03g0740900,Os03g0741000	30401820	30401820	T	C	SNP	.	69	0|0	.|.	.|.	0|0	.|.	.|.	0|0	.|.	.|.	.|.	.|.	.|.	0|1	0|0	0|0	0|0	0|0	0|0	1,0	0,0	0,0	1,0	0,0	0,0	2,0	0,0	0,0	0,0	0,0	0,0	0,2	1,0	1,0	6,0	1,0	5,0	upstream;downstream	-	-
Os03g0740833;Os03g0740900,Os03g0741000	30401944	30401958	tctctctctctctct	-	Deletion	.	330	1|1	.|.	.|.	.|.	.|.	.|.	0|1	.|.	.|.	.|.	.|.	.|.	.|.	.|.	1|1	0|1	1|1	0|1	0,1	0,0	0,0	0,0	0,0	0,0	2,0	0,0	0,0	0,0	0,0	0,0	0,0	0,0	0,2	6,3	0,1	2,3	upstream;downstream	-	-
Os03g0740833;Os03g0740900,Os03g0741000	30401956	30401956	t	-	Deletion	.	107	1|1	.|.	.|.	.|.	.|.	.|.	.|.	.|.	.|.	.|.	.|.	.|.	.|.	.|.	1|1	1|1	1|1	0|1	0,1	0,0	0,0	0,0	0,0	0,0	0,0	0,0	0,0	0,0	0,0	0,0	0,0	0,0	1,1	0,3	0,1	3,2	upstream;downstream	-	-
Os03g0740833;Os03g0740900,Os03g0741000	30401820	30401820	T	C	SNP	.	69	0|0	.|.	.|.	0|0	.|.	.|.	0|0	.|.	.|.	.|.	.|.	.|.	0|1	0|0	0|0	0|0	0|0	0|0	1,0	0,0	0,0	1,0	0,0	0,0	2,0	0,0	0,0	0,0	0,0	0,0	0,2	1,0	1,0	6,0	1,0	5,0	upstream;downstream	-	-
Os03g0740833;Os03g0740900,Os03g0741000	30401944	30401958	tctctctctctctct	-	Deletion	.	330	1|1	.|.	.|.	.|.	.|.	.|.	0|1	.|.	.|.	.|.	.|.	.|.	.|.	.|.	1|1	0|1	1|1	0|1	0,1	0,0	0,0	0,0	0,0	0,0	2,0	0,0	0,0	0,0	0,0	0,0	0,0	0,0	0,2	6,3	0,1	2,3	upstream;downstream	-	-
Os03g0740833;Os03g0740900,Os03g0741000	30401956	30401956	t	-	Deletion	.	107	1|1	.|.	.|.	.|.	.|.	.|.	.|.	.|.	.|.	.|.	.|.	.|.	.|.	.|.	1|1	1|1	1|1	0|1	0,1	0,0	0,0	0,0	0,0	0,0	0,0	0,0	0,0	0,0	0,0	0,0	0,0	0,0	1,1	0,3	0,1	3,2	upstream;downstream	-	-
Os03g0741100;Os03g0741050	30406120	30406120	G	T	SNP	.	999	.|.	1|1	1|1	1|1	.|.	1|1	1|1	1|1	1|1	1|1	1|1	1|1	1|1	1|1	1|1	1|1	1|1	1|1	0,0	0,5	0,1	0,1	0,0	0,2	0,7	0,3	0,10	0,3	0,4	0,6	0,17	0,17	0,20	0,17	0,11	0,19	upstream;downstream	-	-
Os03g0741100;Os03g0741050	30406299	30406299	T	C	SNP	.	148	0|0	0|0	0|0	0|0	0|0	0|0	0|0	0|1	0|0	0|0	0|0	0|0	0|0	0|0	0|0	0|0	0|0	0|0	28,0	7,0	12,0	11,0	19,0	8,0	29,0	6,5	13,0	15,0	15,0	19,0	54,0	63,0	72,0	47,0	48,0	38,0	upstream;downstream	-	-
Os03g0741100;Os03g0741050	30406755	30406761	aaaaaaa	-	Deletion	.	27.5516	0|0	0|0	0|0	0|0	0|0	0|0	0|0	0|0	0|0	0|1	.|.	0|0	0|0	0|0	0|0	0|1	0|0	0|0	3,0	2,0	6,0	11,0	16,0	2,0	7,0	3,0	28,0	0,2	0,0	1,0	33,0	18,0	21,0	6,2	20,0	8,0	upstream;downstream	-	-
Os03g0741100	30407013	30407013	T	C	SNP	.	115	0|0	.|.	0|0	0|0	0|0	0|0	0|0	0|0	0|0	0|1	0|0	0|0	0|0	0|0	0|0	0|0	0|0	0|0	5,0	0,0	5,0	4,0	8,0	4,0	14,0	7,0	12,0	8,4	12,0	12,0	27,0	18,0	26,0	45,0	34,0	29,0	exonic	nonsynonymous SNV	Os03g0741100:Os03t0741100-01:exon1:c.T106C:p.S36P,
Os03g0741100	30408046	30408046	G	T	SNP	.	25.1472	0|0	0|0	.|.	0|0	0|0	.|.	0|0	0|0	.|.	0|1	0|0	0|0	0|0	0|0	0|0	0|0	0|0	0|0	11,0	1,0	0,0	4,0	7,0	0,0	9,0	3,0	0,0	9,4	2,0	16,0	10,0	12,0	10,0	33,0	8,0	22,0	intronic	-	-
Os03g0741100	30409882	30409887	tatata	-	Deletion	.	44.6345	.|.	.|.	.|.	.|.	.|.	.|.	.|.	.|.	.|.	.|.	.|.	.|.	0|1	0|0	0|0	0|0	0|0	0|0	0,0	0,0	0,0	0,0	0,0	0,0	0,0	0,0	0,0	0,0	0,0	0,0	2,2	22,0	13,0	12,0	15,0	9,0	downstream	-	-
Os03g0741100	30409898	30409904	aaaaaaa	-	Deletion	.	65	.|.	.|.	.|.	.|.	.|.	.|.	.|.	.|.	.|.	.|.	.|.	.|.	0|0	0|0	0|0	0|1	0|0	0|0	0,0	0,0	0,0	0,0	0,0	0,0	0,0	0,0	0,0	0,0	0,0	0,0	4,0	22,0	9,0	6,4	13,0	8,0	downstream	-	-
Os03g0741100(dist=2160),Os03g0741400(dist=10679)	30411502	30411512	ttttttttttt	-	Deletion	.	180	.|.	.|.	.|.	.|.	.|.	.|.	.|.	.|.	.|.	.|.	.|.	.|.	1|1	1|1	0|1	1|1	1|1	1|1	0,0	0,0	0,0	0,0	0,0	0,0	0,0	0,0	0,0	0,0	0,0	0,0	0,3	0,1	1,1	0,5	0,4	2,3	intergenic	-	-
Os03g0741100(dist=2342),Os03g0741400(dist=10507)	30411684	30411684	C	T	SNP	.	791	.|.	.|.	.|.	.|.	.|.	.|.	.|.	.|.	.|.	.|.	.|.	.|.	1|1	1|1	1|1	1|1	1|1	1|1	0,0	0,0	0,0	0,0	0,0	0,0	0,0	0,0	0,0	0,0	0,0	0,0	0,4	0,1	0,7	0,7	0,3	0,2	intergenic	-	-
Os03g0741100(dist=3055),Os03g0741400(dist=9794)	30412397	30412397	C	T	SNP	.	51	.|.	.|.	.|.	.|.	.|.	.|.	.|.	.|.	.|.	.|.	.|.	1|1	.|.	.|.	.|.	.|.	1|1	.|.	0,0	0,0	0,0	0,0	0,0	0,0	0,0	0,0	0,0	0,0	0,0	0,1	0,0	0,0	0,0	0,0	0,1	0,0	intergenic	-	-
Os03g0741100(dist=5941),Os03g0741400(dist=6908)	30415283	30415283	C	T	SNP	.	43.5918	.|.	.|.	.|.	.|.	.|.	.|.	.|.	.|.	.|.	.|.	.|.	.|.	.|.	.|.	.|.	.|.	.|.	1|1	0,0	0,0	0,0	0,0	0,0	0,0	0,0	0,0	0,0	0,0	0,0	0,0	0,0	0,0	0,0	0,0	0,0	0,2	intergenic	-	-
Os03g0741100(dist=9077),Os03g0741400(dist=3772)	30418419	30418419	G	A	SNP	.	106	.|.	.|.	.|.	.|.	.|.	1|1	1|1	.|.	.|.	.|.	.|.	.|.	.|.	.|.	.|.	.|.	.|.	.|.	0,0	0,0	0,0	0,0	0,0	0,1	0,3	0,0	0,0	0,0	0,0	0,0	0,0	0,0	0,0	0,0	0,0	0,0	intergenic	-	-
Os03g0741050	30403222	30403222	A	G	SNP	.	42.5044	0|0	0|1	0|0	0|0	0|0	0|0	0|0	0|0	0|0	0|1	0|0	0|0	0|0	0|0	0|0	0|0	0|0	0|0	64,0	16,4	27,0	28,0	57,0	24,0	51,0	38,0	44,0	18,3	27,0	54,0	234,0	200,0	222,0	213,0	137,0	133,0	ncRNA_exonic	-	-
Os03g0741050	30403362	30403362	T	G	SNP	.	62	0|0	0|0	0|0	0|0	0|0	0|0	0|0	0|1	0|0	0|0	0|0	0|0	0|0	0|0	0|0	0|0	0|0	0|0	64,0	33,0	38,0	37,0	59,0	26,0	62,0	37,5	58,0	29,0	23,0	63,0	214,0	207,0	201,0	201,0	172,0	154,0	ncRNA_exonic	-	-
Os03g0741050	30404844	30404844	C	T	SNP	.	46.6124	0|0	0|0	0|0	0|1	0|0	0|0	0|0	0|0	0|0	0|0	.|.	0|0	0|0	0|0	0|0	0|0	0|0	0|0	11,0	12,0	7,0	6,2	8,0	2,0	11,0	20,0	31,0	9,0	0,0	11,0	26,0	34,0	45,0	59,0	41,0	37,0	ncRNA_exonic	-	-
Os03g0741050	30404894	30404894	T	C	SNP	.	48.8803	0|0	0|1	0|0	0|0	0|0	0|0	0|0	0|0	0|0	0|0	.|.	0|0	0|0	0|0	0|0	0|0	0|0	0|0	8,0	6,4	5,0	8,0	3,0	7,0	12,0	14,0	34,0	9,0	0,0	11,0	27,0	41,0	49,0	51,0	38,0	42,0	ncRNA_exonic	-	-
Os03g0741050	30405238	30405238	C	T	SNP	.	58	0|0	.|.	0|0	0|0	0|0	0|0	0|0	0|1	0|0	0|0	0|0	0|0	0|0	0|0	0|0	0|0	0|0	0|0	15,0	0,0	12,0	12,0	14,0	12,0	15,0	2,4	24,0	4,0	18,0	4,0	56,0	37,0	44,0	36,0	33,0	27,0	ncRNA_exonic	-	-
Os03g0741050	30405325	30405325	C	T	SNP	.	55	0|0	.|.	0|0	0|0	0|0	0|0	0|1	0|0	0|0	0|0	0|0	0|0	0|0	0|0	0|0	0|0	0|0	0|0	11,0	0,0	8,0	9,0	10,0	9,0	10,5	6,0	23,0	1,0	18,0	1,0	32,0	25,0	24,0	29,0	19,0	12,0	ncRNA_exonic	-	-
Os03g0741100;Os03g0741050	30406120	30406120	G	T	SNP	.	999	.|.	1|1	1|1	1|1	.|.	1|1	1|1	1|1	1|1	1|1	1|1	1|1	1|1	1|1	1|1	1|1	1|1	1|1	0,0	0,5	0,1	0,1	0,0	0,2	0,7	0,3	0,10	0,3	0,4	0,6	0,17	0,17	0,20	0,17	0,11	0,19	upstream;downstream	-	-
Os03g0741100;Os03g0741050	30406299	30406299	T	C	SNP	.	148	0|0	0|0	0|0	0|0	0|0	0|0	0|0	0|1	0|0	0|0	0|0	0|0	0|0	0|0	0|0	0|0	0|0	0|0	28,0	7,0	12,0	11,0	19,0	8,0	29,0	6,5	13,0	15,0	15,0	19,0	54,0	63,0	72,0	47,0	48,0	38,0	upstream;downstream	-	-
Os03g0741100;Os03g0741050	30406755	30406761	aaaaaaa	-	Deletion	.	27.5516	0|0	0|0	0|0	0|0	0|0	0|0	0|0	0|0	0|0	0|1	.|.	0|0	0|0	0|0	0|0	0|1	0|0	0|0	3,0	2,0	6,0	11,0	16,0	2,0	7,0	3,0	28,0	0,2	0,0	1,0	33,0	18,0	21,0	6,2	20,0	8,0	upstream;downstream	-	-
Os03g0741100(dist=2160),Os03g0741400(dist=10679)	30411502	30411512	ttttttttttt	-	Deletion	.	180	.|.	.|.	.|.	.|.	.|.	.|.	.|.	.|.	.|.	.|.	.|.	.|.	1|1	1|1	0|1	1|1	1|1	1|1	0,0	0,0	0,0	0,0	0,0	0,0	0,0	0,0	0,0	0,0	0,0	0,0	0,3	0,1	1,1	0,5	0,4	2,3	intergenic	-	-
Os03g0741100(dist=2342),Os03g0741400(dist=10507)	30411684	30411684	C	T	SNP	.	791	.|.	.|.	.|.	.|.	.|.	.|.	.|.	.|.	.|.	.|.	.|.	.|.	1|1	1|1	1|1	1|1	1|1	1|1	0,0	0,0	0,0	0,0	0,0	0,0	0,0	0,0	0,0	0,0	0,0	0,0	0,4	0,1	0,7	0,7	0,3	0,2	intergenic	-	-
Os03g0741100(dist=3055),Os03g0741400(dist=9794)	30412397	30412397	C	T	SNP	.	51	.|.	.|.	.|.	.|.	.|.	.|.	.|.	.|.	.|.	.|.	.|.	1|1	.|.	.|.	.|.	.|.	1|1	.|.	0,0	0,0	0,0	0,0	0,0	0,0	0,0	0,0	0,0	0,0	0,0	0,1	0,0	0,0	0,0	0,0	0,1	0,0	intergenic	-	-
Os03g0741100(dist=5941),Os03g0741400(dist=6908)	30415283	30415283	C	T	SNP	.	43.5918	.|.	.|.	.|.	.|.	.|.	.|.	.|.	.|.	.|.	.|.	.|.	.|.	.|.	.|.	.|.	.|.	.|.	1|1	0,0	0,0	0,0	0,0	0,0	0,0	0,0	0,0	0,0	0,0	0,0	0,0	0,0	0,0	0,0	0,0	0,0	0,2	intergenic	-	-
Os03g0741100(dist=9077),Os03g0741400(dist=3772)	30418419	30418419	G	A	SNP	.	106	.|.	.|.	.|.	.|.	.|.	1|1	1|1	.|.	.|.	.|.	.|.	.|.	.|.	.|.	.|.	.|.	.|.	.|.	0,0	0,0	0,0	0,0	0,0	0,1	0,3	0,0	0,0	0,0	0,0	0,0	0,0	0,0	0,0	0,0	0,0	0,0	intergenic	-	-
Os03g0741400	30422353	30422353	T	G	SNP	.	420	.|.	.|.	.|.	.|.	.|.	.|.	.|.	.|.	.|.	.|.	.|.	.|.	1|1	1|1	1|1	.|.	.|.	1|1	0,0	0,0	0,0	0,0	0,0	0,0	0,0	0,0	0,0	0,0	0,0	0,0	0,4	0,3	0,1	0,0	0,0	0,1	intronic	-	-
Os03g0741400	30423334	30423334	T	C	SNP	.	110	0|0	0|0	0|0	0|0	0|0	0|0	0|0	0|1	0|0	0|0	0|0	0|0	0|0	0|0	0|0	0|0	0|0	0|0	18,0	1,0	24,0	25,0	20,0	16,0	13,0	10,4	18,0	30,0	23,0	13,0	78,0	87,0	76,0	109,0	76,0	89,0	exonic	nonsynonymous SNV	Os03g0741400:Os03t0741400-01:exon2:c.T289C:p.S97P,
Os03g0741400	30423364	30423364	C	T	SNP	.	21.0184	0|0	0|0	0|0	0|0	0|0	0|0	0|0	0|0	0|0	0|0	0|1	0|0	0|0	0|0	0|0	0|0	0|0	0|0	12,0	1,0	9,0	19,0	25,0	14,0	21,0	19,0	16,0	21,0	28,6	14,0	83,0	64,0	56,0	96,0	74,0	76,0	exonic	nonsynonymous SNV	Os03g0741400:Os03t0741400-01:exon2:c.C319T:p.P107S,
Os03g0741400	30423779	30423779	G	C	SNP	.	46.4834	.|.	0|0	0|0	.|.	0|0	0|0	0|0	.|.	.|.	.|.	.|.	0|0	0|0	0|0	0|0	0|1	0|0	0|0	0,0	4,0	3,0	0,0	4,0	11,0	1,0	0,0	0,0	0,0	0,0	3,0	9,0	12,0	9,0	20,3	20,0	12,0	exonic	nonsynonymous SNV	Os03g0741400:Os03t0741400-01:exon2:c.G734C:p.S245T,
Os03g0741400	30424363	30424363	T	C	SNP	.	21.1531	0|0	.|.	0|0	0|0	0|0	0|0	0|1	0|0	.|.	0|0	0|0	0|0	0|0	0|0	0|0	0|0	0|0	0|0	3,0	0,0	3,0	4,0	3,0	1,0	0,2	2,0	0,0	5,0	6,0	8,0	22,0	25,0	32,0	44,0	26,0	40,0	intronic	-	-
Os03g0741400	30424733	30424733	A	G	SNP	.	999	1|1	.|.	.|.	.|.	1|1	.|.	.|.	1|1	.|.	.|.	1|1	1|1	1|1	1|1	1|1	1|1	1|1	1|1	0,2	0,0	0,0	0,0	0,8	0,0	0,0	0,8	0,0	0,0	0,2	0,1	0,8	0,15	0,8	0,22	0,10	0,13	intronic	-	-
Os03g0741400	30425432	30425432	C	T	SNP	.	20.4365	.|.	.|.	.|.	0|0	.|.	0|0	0|0	0|0	.|.	0|1	0|0	.|.	.|.	.|.	0|0	0|0	0|0	0|0	0,0	0,0	0,0	1,0	0,0	4,0	4,0	1,0	0,0	0,1	2,0	0,0	0,0	0,0	3,0	3,0	1,0	4,0	downstream	-	-
Os03g0741700,Os03g0741900	30443665	30443665	A	G	SNP	.	59	.|.	.|.	.|.	.|.	.|.	0|0	0|0	.|.	0|0	.|.	.|.	0|0	0|0	0|0	0|0	0|0	.|.	0|1	0,0	0,0	0,0	0,0	0,0	2,0	2,0	0,0	6,0	0,0	0,0	7,0	5,0	7,0	7,0	2,0	0,0	3,2	intronic	-	-
Os03g0741700,Os03g0741900	30443759	30443762	GTGT	-	Deletion	.	61	0|0	.|.	.|.	0|0	.|.	0|0	0|0	.|.	0|0	0|0	0|0	0|0	0|1	0|0	0|0	0|0	0|0	0|0	2,0	0,0	0,0	1,0	0,0	2,0	2,0	0,0	15,0	5,0	2,0	7,0	7,4	11,0	11,0	6,0	7,0	8,0	intronic	-	-
Os03g0741700,Os03g0741900	30443983	30443983	T	A	SNP	.	79	0|0	.|.	.|.	.|.	.|.	0|0	0|0	.|.	0|0	.|.	1|1	0|0	0|0	0|0	0|0	0|0	0|0	0|0	4,0	0,0	0,0	0,0	0,0	1,0	2,0	0,0	19,0	0,0	0,5	3,0	6,0	7,0	14,0	9,0	2,0	7,0	intronic	-	-
Os03g0741700	30439639	30439639	A	C	SNP	.	88	.|.	.|.	0|0	.|.	.|.	.|.	0|0	.|.	1|1	.|.	.|.	0|0	0|0	.|.	.|.	0|0	0|0	.|.	0,0	0,0	2,0	0,0	0,0	0,0	1,0	0,0	0,6	0,0	0,0	1,0	1,0	0,0	0,0	1,0	2,0	0,0	downstream	-	-
Os03g0741700	30440230	30440230	T	C	SNP	.	23.9382	0|0	.|.	0|0	.|.	.|.	.|.	0|0	.|.	.|.	0|0	0|0	0|0	0|1	0|0	0|0	0|0	0|0	0|0	1,0	0,0	1,0	0,0	0,0	0,0	3,0	0,0	0,0	3,0	5,0	1,0	0,2	1,0	2,0	4,0	9,0	3,0	downstream	-	-
Os03g0741700	30441771	30441771	C	G	SNP	.	44.3929	0|0	.|.	0|0	.|.	0|0	0|0	0|0	.|.	0|0	0|1	0|0	0|0	0|0	0|0	0|0	0|0	0|0	0|0	2,0	0,0	4,0	0,0	5,0	3,0	7,0	0,0	6,0	8,4	4,0	8,0	32,0	37,0	27,0	26,0	24,0	17,0	intronic	-	-
Os03g0741700,Os03g0741900	30443665	30443665	A	G	SNP	.	59	.|.	.|.	.|.	.|.	.|.	0|0	0|0	.|.	0|0	.|.	.|.	0|0	0|0	0|0	0|0	0|0	.|.	0|1	0,0	0,0	0,0	0,0	0,0	2,0	2,0	0,0	6,0	0,0	0,0	7,0	5,0	7,0	7,0	2,0	0,0	3,2	intronic	-	-
Os03g0741700,Os03g0741900	30443759	30443762	GTGT	-	Deletion	.	61	0|0	.|.	.|.	0|0	.|.	0|0	0|0	.|.	0|0	0|0	0|0	0|0	0|1	0|0	0|0	0|0	0|0	0|0	2,0	0,0	0,0	1,0	0,0	2,0	2,0	0,0	15,0	5,0	2,0	7,0	7,4	11,0	11,0	6,0	7,0	8,0	intronic	-	-
Os03g0741700,Os03g0741900	30443983	30443983	T	A	SNP	.	79	0|0	.|.	.|.	.|.	.|.	0|0	0|0	.|.	0|0	.|.	1|1	0|0	0|0	0|0	0|0	0|0	0|0	0|0	4,0	0,0	0,0	0,0	0,0	1,0	2,0	0,0	19,0	0,0	0,5	3,0	6,0	7,0	14,0	9,0	2,0	7,0	intronic	-	-
Os03g0742300,Os03g0742400	30453797	30453797	G	A	SNP	.	23.5081	0|0	.|.	.|.	.|.	.|.	0|0	.|.	.|.	.|.	0|0	.|.	.|.	.|.	0|0	.|.	0|0	0|1	0|0	1,0	0,0	0,0	0,0	0,0	3,0	0,0	0,0	0,0	3,0	0,0	0,0	0,0	4,0	0,0	6,0	1,2	6,0	downstream	-	-
Os03g0742300,Os03g0742400	30453797	30453797	G	A	SNP	.	23.5081	0|0	.|.	.|.	.|.	.|.	0|0	.|.	.|.	.|.	0|0	.|.	.|.	.|.	0|0	.|.	0|0	0|1	0|0	1,0	0,0	0,0	0,0	0,0	3,0	0,0	0,0	0,0	3,0	0,0	0,0	0,0	4,0	0,0	6,0	1,2	6,0	downstream	-	-
Os03g0742400	30455429	30455429	A	G	SNP	.	28.4487	0|0	0|0	0|0	0|0	0|0	0|0	0|1	0|0	0|0	0|0	0|0	0|0	0|0	0|0	0|0	0|0	0|0	0|0	21,0	8,0	15,0	14,0	12,0	11,0	6,3	6,0	48,0	14,0	6,0	20,0	41,0	34,0	29,0	34,0	33,0	34,0	intronic	-	-
Os03g0742400	30456150	30456150	G	A	SNP	.	999	1|1	.|.	1|1	1|1	1|1	1|1	.|.	1|1	1|1	1|1	1|1	1|1	1|1	1|1	1|1	1|1	1|1	1|1	0,1	0,0	0,8	0,5	0,1	0,1	0,0	0,5	0,4	0,3	0,7	0,8	0,11	0,6	0,10	0,17	0,23	0,14	intronic	-	-
Os03g0742400	30456469	30456469	A	G	SNP	.	30.1477	0|0	0|0	0|0	0|0	0|0	0|0	0|0	0|0	0|0	0|0	0|0	0|1	0|0	0|0	0|0	0|0	0|0	0|0	21,0	10,0	35,0	25,0	13,0	17,0	13,0	18,0	9,0	62,0	66,0	35,6	74,0	59,0	58,0	81,0	94,0	60,0	exonic	nonsynonymous SNV	Os03g0742400:Os03t0742400-01:exon1:c.T115C:p.S39P,
Os03g0742400	30456820	30456820	A	G	SNP	.	48.6982	0|0	.|.	0|0	0|0	0|0	.|.	0|0	.|.	.|.	.|.	.|.	0|0	0|0	0|0	0|0	0|1	0|0	0|0	5,0	0,0	1,0	1,0	5,0	0,0	6,0	0,0	0,0	0,0	0,0	2,0	23,0	5,0	22,0	14,3	10,0	14,0	upstream	-	-
Os03g0742400(dist=1162),Os03g0742800(dist=18771)	30457747	30457747	C	G	SNP	.	33.7321	0|0	0|0	.|.	0|0	0|0	0|0	0|0	0|0	0|0	0|0	0|0	0|0	0|0	0|0	0|0	0|0	0|1	0|0	7,0	4,0	0,0	7,0	8,0	5,0	4,0	4,0	5,0	6,0	6,0	4,0	16,0	18,0	15,0	16,0	10,2	10,0	intergenic	-	-
Os03g0742400(dist=1624),Os03g0742800(dist=18309)	30458209	30458209	C	-	Deletion	.	23.7705	0|0	0|0	0|0	0|0	0|0	0|0	0|1	0|0	.|.	0|0	.|.	0|0	0|0	0|0	0|0	0|0	0|0	0|0	3,0	10,0	17,0	7,0	10,0	9,0	9,4	6,0	0,0	4,0	0,0	4,0	14,0	10,0	8,0	7,0	8,0	12,0	intergenic	-	-
Os03g0742400(dist=2014),Os03g0742800(dist=17919)	30458599	30458599	G	A	SNP	.	33.6739	0|0	0|0	0|0	0|0	0|0	0|0	0|0	0|0	0|0	0|0	0|0	0|0	0|0	0|0	0|0	0|1	0|0	0|0	32,0	6,0	4,0	5,0	13,0	10,0	13,0	4,0	10,0	30,0	7,0	21,0	22,0	24,0	24,0	36,4	22,0	30,0	intergenic	-	-
Os03g0742400(dist=2232),Os03g0742800(dist=17701)	30458817	30458817	C	G	SNP	.	44.5326	0|0	0|0	0|0	.|.	0|0	0|0	0|0	0|0	.|.	0|1	.|.	0|0	0|0	0|0	0|0	0|0	0|0	0|0	4,0	1,0	2,0	0,0	2,0	5,0	2,0	2,0	0,0	0,3	0,0	1,0	11,0	11,0	8,0	9,0	10,0	5,0	intergenic	-	-
Os03g0742400(dist=1162),Os03g0742800(dist=18771)	30457747	30457747	C	G	SNP	.	33.7321	0|0	0|0	.|.	0|0	0|0	0|0	0|0	0|0	0|0	0|0	0|0	0|0	0|0	0|0	0|0	0|0	0|1	0|0	7,0	4,0	0,0	7,0	8,0	5,0	4,0	4,0	5,0	6,0	6,0	4,0	16,0	18,0	15,0	16,0	10,2	10,0	intergenic	-	-
Os03g0742400(dist=1624),Os03g0742800(dist=18309)	30458209	30458209	C	-	Deletion	.	23.7705	0|0	0|0	0|0	0|0	0|0	0|0	0|1	0|0	.|.	0|0	.|.	0|0	0|0	0|0	0|0	0|0	0|0	0|0	3,0	10,0	17,0	7,0	10,0	9,0	9,4	6,0	0,0	4,0	0,0	4,0	14,0	10,0	8,0	7,0	8,0	12,0	intergenic	-	-
Os03g0742400(dist=2014),Os03g0742800(dist=17919)	30458599	30458599	G	A	SNP	.	33.6739	0|0	0|0	0|0	0|0	0|0	0|0	0|0	0|0	0|0	0|0	0|0	0|0	0|0	0|0	0|0	0|1	0|0	0|0	32,0	6,0	4,0	5,0	13,0	10,0	13,0	4,0	10,0	30,0	7,0	21,0	22,0	24,0	24,0	36,4	22,0	30,0	intergenic	-	-
Os03g0742400(dist=2232),Os03g0742800(dist=17701)	30458817	30458817	C	G	SNP	.	44.5326	0|0	0|0	0|0	.|.	0|0	0|0	0|0	0|0	.|.	0|1	.|.	0|0	0|0	0|0	0|0	0|0	0|0	0|0	4,0	1,0	2,0	0,0	2,0	5,0	2,0	2,0	0,0	0,3	0,0	1,0	11,0	11,0	8,0	9,0	10,0	5,0	intergenic	-	-
Os03g0742800,Os03g0742850	30478069	30478069	A	G	SNP	.	31.3337	0|0	0|0	0|0	0|0	0|0	0|0	0|0	0|0	0|1	0|0	0|0	0|0	0|0	0|0	0|0	0|0	0|0	0|0	28,0	18,0	34,0	16,0	36,0	32,0	41,0	66,0	49,12	45,0	65,0	61,0	65,0	66,0	62,0	80,0	90,0	61,0	exonic	nonsynonymous SNV	Os03g0742800:Os03t0742800-01:exon2:c.A620G:p.E207G,Os03g0742800:Os03t0742800-02:exon2:c.A620G:p.E207G,Os03g0742850:Os03t0742850-00:exon1:c.T244C:p.S82P,
Os03g0742800	30476795	30476795	G	T	SNP	.	999	1|1	1|1	1|1	1|1	1|1	1|1	1|1	1|1	1|1	1|1	1|1	1|1	1|1	1|1	1|1	1|1	1|1	1|1	0,75	0,31	0,59	0,42	0,64	0,80	0,101	0,87	0,83	0,101	0,83	0,82	0,100	0,136	0,106	0,157	0,147	0,121	exonic	nonsynonymous SNV	Os03g0742800:Os03t0742800-01:exon1:c.G191T:p.G64V,Os03g0742800:Os03t0742800-02:exon1:c.G191T:p.G64V,
Os03g0742800,Os03g0742850	30478069	30478069	A	G	SNP	.	31.3337	0|0	0|0	0|0	0|0	0|0	0|0	0|0	0|0	0|1	0|0	0|0	0|0	0|0	0|0	0|0	0|0	0|0	0|0	28,0	18,0	34,0	16,0	36,0	32,0	41,0	66,0	49,12	45,0	65,0	61,0	65,0	66,0	62,0	80,0	90,0	61,0	exonic	nonsynonymous SNV	Os03g0742800:Os03t0742800-01:exon2:c.A620G:p.E207G,Os03g0742800:Os03t0742800-02:exon2:c.A620G:p.E207G,Os03g0742850:Os03t0742850-00:exon1:c.T244C:p.S82P,
Os03g0742800	30479216	30479216	T	G	SNP	.	35.1383	0|0	0|1	0|0	0|0	0|0	0|0	0|0	0|0	0|0	0|0	0|0	0|0	0|0	0|0	0|0	0|0	0|0	0|0	92,0	8,3	46,0	53,0	46,0	51,0	33,0	48,0	27,0	76,0	66,0	54,0	128,0	116,0	131,0	179,0	166,0	187,0	exonic	synonymous SNV	Os03g0742800:Os03t0742800-01:exon2:c.T1767G:p.V589V,Os03g0742800:Os03t0742800-02:exon2:c.T1767G:p.V589V,
Os03g0742800(Os03t0742800-01:c.*347C>T)	30480067	30480067	C	T	SNP	.	30.699	0|1	0|0	0|0	0|0	0|0	0|0	0|0	0|0	0|0	0|0	0|0	0|0	0|0	0|0	0|0	0|0	0|0	0|0	5,3	4,0	7,0	10,0	11,0	14,0	14,0	2,0	11,0	11,0	10,0	2,0	26,0	25,0	20,0	18,0	32,0	22,0	UTR3	-	-
Os03g0742800,Os03g0742850	30478069	30478069	A	G	SNP	.	31.3337	0|0	0|0	0|0	0|0	0|0	0|0	0|0	0|0	0|1	0|0	0|0	0|0	0|0	0|0	0|0	0|0	0|0	0|0	28,0	18,0	34,0	16,0	36,0	32,0	41,0	66,0	49,12	45,0	65,0	61,0	65,0	66,0	62,0	80,0	90,0	61,0	exonic	nonsynonymous SNV	Os03g0742800:Os03t0742800-01:exon2:c.A620G:p.E207G,Os03g0742800:Os03t0742800-02:exon2:c.A620G:p.E207G,Os03g0742850:Os03t0742850-00:exon1:c.T244C:p.S82P,
Os03g0742800	30479216	30479216	T	G	SNP	.	35.1383	0|0	0|1	0|0	0|0	0|0	0|0	0|0	0|0	0|0	0|0	0|0	0|0	0|0	0|0	0|0	0|0	0|0	0|0	92,0	8,3	46,0	53,0	46,0	51,0	33,0	48,0	27,0	76,0	66,0	54,0	128,0	116,0	131,0	179,0	166,0	187,0	exonic	synonymous SNV	Os03g0742800:Os03t0742800-01:exon2:c.T1767G:p.V589V,Os03g0742800:Os03t0742800-02:exon2:c.T1767G:p.V589V,
Os03g0742900(Os03t0742900-03:c.*98T>G,Os03t0742900-01:c.*98T>G)	30480919	30480919	A	C	SNP	.	80	.|.	.|.	.|.	0|0	.|.	.|.	0|0	.|.	0|0	0|1	0|0	0|0	0|0	0|0	0|0	.|.	0|0	0|0	0,0	0,0	0,0	4,0	0,0	0,0	2,0	0,0	3,0	6,6	12,0	7,0	2,0	4,0	4,0	0,0	8,0	4,0	UTR3	-	-
Os03g0742900	30481761	30481761	C	T	SNP	.	102	0|0	0|0	0|0	0|0	0|1	0|0	0|0	0|0	0|0	0|0	0|0	0|0	0|0	0|0	0|0	0|0	0|0	0|0	28,0	13,0	15,0	18,0	21,5	15,0	14,0	8,0	10,0	40,0	43,0	37,0	43,0	33,0	62,0	57,0	53,0	54,0	exonic	synonymous SNV	Os03g0742900:Os03t0742900-01:exon2:c.G285A:p.S95S,
Os03g0742900	30481766	30481766	G	C	SNP	.	45.6568	0|0	0|0	0|0	0|0	0|0	0|0	0|0	0|0	0|0	0|0	0|0	0|1	0|0	0|0	0|0	0|0	0|0	0|0	29,0	13,0	13,0	17,0	25,0	15,0	15,0	8,0	11,0	35,0	37,0	32,4	41,0	35,0	63,0	59,0	46,0	57,0	exonic	nonsynonymous SNV	Os03g0742900:Os03t0742900-01:exon2:c.C280G:p.R94G,
Os03g0742900	30482890	30482890	T	C	SNP	.	24.0124	.|.	.|.	0|0	.|.	.|.	0|0	0|0	.|.	0|0	0|1	0|0	0|0	.|.	.|.	0|0	0|0	0|0	.|.	0,0	0,0	6,0	0,0	0,0	1,0	3,0	0,0	6,0	0,2	6,0	2,0	0,0	0,0	3,0	3,0	3,0	0,0	exonic	synonymous SNV	Os03g0742900:Os03t0742900-01:exon1:c.A240G:p.P80P,
Os03g0743200	30504304	30504307	TTTT	-	Deletion	.	29.8929	0|0	.|.	0|0	0|0	0|0	0|0	0|0	0|1	0|0	0|0	0|0	0|0	0|0	0|0	0|0	0|0	0|0	0|0	14,0	0,0	16,0	22,0	15,0	27,0	15,0	12,8	17,0	21,0	19,0	21,0	48,0	23,0	21,0	29,0	40,0	33,0	exonic	frameshift deletion	Os03g0743200:Os03t0743200-01:exon1:c.1592_1595del:p.I531fs,
Os03g0743200	30504584	30504584	G	C	SNP	.	47.1444	.|.	.|.	0|1	.|.	0|0	0|0	.|.	0|0	.|.	.|.	.|.	0|0	0|0	0|0	.|.	0|0	0|0	0|0	0,0	0,0	0,3	0,0	2,0	3,0	0,0	3,0	0,0	0,0	0,0	2,0	1,0	6,0	0,0	10,0	8,0	1,0	intronic	-	-
Os03g0743200(Os03t0743200-01:c.*38A>G)	30504849	30504849	A	G	SNP	.	22.2499	0|0	.|.	0|0	0|0	0|0	0|0	0|0	0|0	.|.	0|0	0|0	0|1	0|0	0|0	0|0	0|0	0|0	0|0	2,0	0,0	2,0	1,0	2,0	2,0	2,0	1,0	0,0	11,0	2,0	0,2	4,0	1,0	4,0	14,0	4,0	10,0	UTR3	-	-
Os03g0743400(Os03t0743400-01:c.-302G>C)	30513912	30513912	G	C	SNP	.	999	.|.	1|1	.|.	1|1	1|1	.|.	1|1	.|.	1|1	1|1	1|1	1|1	1|1	1|1	1|1	1|1	1|1	1|1	0,0	0,3	0,0	0,1	0,1	0,0	0,1	0,0	0,7	0,2	0,1	0,2	0,3	0,4	0,11	0,6	0,9	0,3	UTR5	-	-
Os03g0743400	30515430	30515430	G	T	SNP	.	120	.|.	.|.	.|.	0|0	0|0	.|.	.|.	0|0	0|0	.|.	0|0	0|1	0|0	0|0	0|0	0|0	0|0	0|0	0,0	0,0	0,0	1,0	2,0	0,0	0,0	2,0	15,0	0,0	3,0	7,4	5,0	8,0	7,0	3,0	4,0	3,0	intronic	-	-
Os03g0743400	30515857	30515857	G	T	SNP	.	26.7269	0|0	.|.	0|0	0|0	0|0	.|.	0|1	.|.	0|0	0|0	0|0	0|1	0|1	0|0	0|0	0|0	0|0	0|0	4,0	0,0	7,0	4,0	6,0	0,0	4,1	0,0	4,0	10,0	5,0	0,1	8,2	16,0	17,1	12,0	12,0	18,0	intronic	-	-
Os03g0743400	30515882	30515882	A	G	SNP	.	50	0|0	.|.	0|1	0|0	0|0	.|.	0|0	.|.	0|0	0|0	0|0	0|0	0|0	0|0	0|0	0|0	0|0	0|0	4,0	0,0	5,2	4,0	8,0	0,0	6,0	0,0	4,0	9,0	6,0	3,0	13,0	25,0	25,0	14,0	11,0	22,0	intronic	-	-
Os03g0743400	30515987	30515987	C	T	SNP	.	39.5453	0|0	0|0	0|0	0|0	0|0	0|0	0|0	0|0	0|0	0|0	0|0	0|1	0|0	0|0	0|0	0|0	0|0	0|0	23,0	28,0	22,0	30,0	30,0	7,0	5,0	5,0	35,0	33,0	42,0	15,4	35,0	45,0	36,0	49,0	42,0	57,0	exonic	synonymous SNV	Os03g0743400:Os03t0743400-01:exon3:c.C129T:p.G43G,
Os03g0743500;Os03g0743400	30517379	30517379	C	T	SNP	.	42.3948	0|0	.|.	0|0	0|0	.|.	.|.	.|.	.|.	.|.	0|0	.|.	0|0	0|0	0|0	0|0	.|.	0|1	0|0	1,0	0,0	3,0	1,0	0,0	0,0	0,0	0,0	0,0	5,0	0,0	3,0	1,0	2,0	3,0	0,0	2,3	2,0	upstream;downstream	-	-
Os03g0743500(Os03t0743500-01:c.*661G>A,Os03t0743500-02:c.*243G>A)	30519622	30519622	G	A	SNP	.	30.6341	0|0	0|0	0|0	0|0	0|0	0|0	0|0	0|0	0|0	0|0	0|0	0|0	0|0	0|1	0|0	0|0	0|0	0|0	3,0	5,0	2,0	1,0	2,0	5,0	6,0	3,0	7,0	26,0	7,0	7,0	10,0	11,2	2,0	12,0	20,0	22,0	UTR3	-	-
Os03g0743650(Os03t0743650-01:c.-574C>G)	30521002	30521002	G	C	SNP	.	22.5702	0|0	.|.	.|.	.|.	.|.	.|.	.|.	.|.	0|1	.|.	0|0	.|.	.|.	0|0	0|0	.|.	0|0	0|0	2,0	0,0	0,0	0,0	0,0	0,0	0,0	0,0	0,1	0,0	1,0	0,0	0,0	5,0	1,0	0,0	6,0	1,0	UTR5	-	-
Os03g0743900	30532677	30532677	A	G	SNP	.	38.8704	0|0	0|1	0|0	0|0	0|0	0|0	0|0	0|0	0|0	0|0	0|0	0|0	0|0	0|0	0|0	0|0	0|0	0|0	34,0	22,3	37,0	32,0	24,0	22,0	25,0	51,0	23,0	17,0	89,0	81,0	129,0	103,0	108,0	109,0	122,0	132,0	exonic	nonsynonymous SNV	Os03g0743900:Os03t0743900-01:exon4:c.T1216C:p.Y406H,
Os03g0743900	30532874	30532874	G	A	SNP	.	51	0|0	0|0	0|0	0|0	0|0	0|0	0|0	0|0	0|1	0|0	0|0	0|0	0|0	0|0	0|0	0|0	0|0	0|0	36,0	22,0	31,0	29,0	22,0	27,0	16,0	53,0	17,6	16,0	85,0	76,0	121,0	101,0	103,0	108,0	112,0	129,0	exonic	nonsynonymous SNV	Os03g0743900:Os03t0743900-01:exon3:c.C1195T:p.L399F,
Os03g0743900	30534803	30534803	G	T	SNP	.	94	0|0	0|1	0|0	0|0	0|0	0|0	0|0	0|0	0|0	0|0	0|0	0|0	0|0	0|0	0|0	0|0	0|0	0|0	89,0	35,6	34,0	18,0	48,0	68,0	57,0	38,0	40,0	87,0	129,0	108,0	98,0	127,0	127,0	189,0	147,0	151,1	exonic	nonsynonymous SNV	Os03g0743900:Os03t0743900-01:exon1:c.C476A:p.A159E,
Os03g0743900	30534955	30534955	C	T	SNP	.	27.7893	0|0	0|0	0|0	0|0	0|0	0|0	0|0	0|0	0|0	0|0	0|0	0|0	0|0	0|0	0|0	0|1	0|0	0|0	30,0	16,0	7,0	16,0	18,0	25,0	32,0	16,0	40,0	26,0	29,0	49,0	49,0	52,0	45,0	23,3	61,0	39,0	exonic	synonymous SNV	Os03g0743900:Os03t0743900-01:exon1:c.G324A:p.G108G,
Os03g0744100;Os03g0744200	30545606	30545606	G	A	SNP	.	141	.|.	.|.	.|.	0|0	0|0	.|.	.|.	.|.	.|.	.|.	0|1	.|.	0|0	0|0	0|0	0|0	0|0	0|0	0,0	0,0	0,0	1,0	1,0	0,0	0,0	0,0	0,0	0,0	11,5	0,0	1,0	9,1	10,0	1,0	10,0	2,0	upstream;downstream	-	-
Os03g0744100;Os03g0744200	30545616	30545618	TTT	-	Deletion	.	40.2621	.|.	.|.	.|.	0|0	0|0	.|.	.|.	.|.	.|.	.|.	0|0	.|.	0|0	0|1	0|0	0|0	0|0	0|0	0,0	0,0	0,0	2,0	2,0	0,0	0,0	0,0	0,0	0,0	30,0	0,0	2,0	9,2	12,0	1,0	15,0	4,0	upstream;downstream	-	-
Os03g0744100;Os03g0744200	30546225	30546225	A	C	SNP	.	22.0564	.|.	.|.	.|.	.|.	.|.	0|0	0|0	.|.	.|.	0|0	.|.	.|.	0|0	0|0	0|0	0|1	0|0	0|0	0,0	0,0	0,0	0,0	0,0	5,0	4,0	0,0	0,0	3,0	0,0	0,0	1,0	8,0	3,0	9,3	1,0	9,0	upstream;downstream	-	-
Os03g0744100;Os03g0744200	30545606	30545606	G	A	SNP	.	141	.|.	.|.	.|.	0|0	0|0	.|.	.|.	.|.	.|.	.|.	0|1	.|.	0|0	0|0	0|0	0|0	0|0	0|0	0,0	0,0	0,0	1,0	1,0	0,0	0,0	0,0	0,0	0,0	11,5	0,0	1,0	9,1	10,0	1,0	10,0	2,0	upstream;downstream	-	-
Os03g0744100;Os03g0744200	30545616	30545618	TTT	-	Deletion	.	40.2621	.|.	.|.	.|.	0|0	0|0	.|.	.|.	.|.	.|.	.|.	0|0	.|.	0|0	0|1	0|0	0|0	0|0	0|0	0,0	0,0	0,0	2,0	2,0	0,0	0,0	0,0	0,0	0,0	30,0	0,0	2,0	9,2	12,0	1,0	15,0	4,0	upstream;downstream	-	-
Os03g0744100;Os03g0744200	30546225	30546225	A	C	SNP	.	22.0564	.|.	.|.	.|.	.|.	.|.	0|0	0|0	.|.	.|.	0|0	.|.	.|.	0|0	0|0	0|0	0|1	0|0	0|0	0,0	0,0	0,0	0,0	0,0	5,0	4,0	0,0	0,0	3,0	0,0	0,0	1,0	8,0	3,0	9,3	1,0	9,0	upstream;downstream	-	-
Os03g0744300(Os03t0744300-02:c.*389T>A,Os03t0744300-01:c.*389T>A)	30549175	30549175	A	T	SNP	.	84	0|0	0|0	0|0	0|0	0|0	0|0	0|0	0|0	0|0	0|1	0|0	0|0	0|0	0|0	0|0	0|0	0|0	0|0	59,0	14,0	12,0	30,0	43,0	19,0	31,0	16,0	27,0	37,6	50,0	42,0	59,0	90,0	69,0	86,0	94,0	99,0	UTR3	-	-
Os03g0744300(Os03t0744300-02:c.*378T>C,Os03t0744300-01:c.*378T>C)	30549186	30549186	A	G	SNP	.	179	0|0	0|0	0|0	0|0	0|0	0|0	0|0	0|0	0|1	0|0	0|0	0|0	0|0	0|0	0|0	0|0	0|0	0|0	59,0	14,0	12,0	30,0	44,0	19,0	31,0	16,0	19,8	45,0	50,0	43,0	62,0	88,0	68,0	86,0	98,0	102,0	UTR3	-	-
Os03g0744300	30549737	30549737	C	G	SNP	.	23.7648	0|0	0|0	0|0	0|0	0|0	.|.	0|0	0|1	0|0	0|0	0|0	0|0	0|0	0|0	0|0	0|0	0|0	0|0	23,0	13,0	13,0	8,0	19,0	0,0	16,0	15,4	6,0	29,0	25,0	30,0	56,0	74,0	65,0	91,0	73,0	68,0	exonic	nonsynonymous SNV	Os03g0744300:Os03t0744300-02:exon2:c.G82C:p.D28H,Os03g0744300:Os03t0744300-01:exon8:c.G1600C:p.D534H,
Os03g0744300	30550577	30550577	T	C	SNP	.	56	0|0	0|0	0|0	0|0	0|0	0|0	0|0	0|1	0|0	0|0	.|.	0|0	0|0	0|0	0|0	0|0	0|0	0|0	9,0	10,0	4,0	9,0	1,0	10,0	3,0	3,4	14,0	7,0	0,0	23,0	23,0	8,0	16,0	11,0	9,0	10,0	intronic	-	-
Os03g0744300	30550629	30550629	G	A	SNP	.	45.929	0|0	0|0	0|0	0|0	0|0	0|1	0|0	0|0	0|0	0|0	.|.	0|0	0|0	0|0	0|0	0|0	0|0	0|0	9,0	9,0	5,0	5,0	1,0	7,4	3,0	7,0	19,0	5,0	0,0	19,0	21,0	9,0	11,0	10,0	10,0	8,0	intronic	-	-
Os03g0744300	30552244	30552244	A	G	SNP	.	49.0314	0|0	0|0	0|0	0|0	0|0	0|0	0|0	0|1	0|0	0|0	0|0	0|0	0|0	0|0	0|0	0|0	0|0	0|0	34,0	13,0	28,0	18,0	22,0	31,0	48,0	26,8	42,0	103,0	135,0	98,0	121,0	140,0	119,0	155,0	170,0	128,0	exonic	synonymous SNV	Os03g0744300:Os03t0744300-01:exon3:c.T690C:p.D230D,
Os03g0744300(dist=1391),Os03g0744501(dist=4373)	30554480	30554480	A	G	SNP	.	49.5713	0|0	0|0	0|0	0|0	.|.	0|0	0|0	0|0	0|0	0|1	0|0	0|0	0|0	0|0	0|0	0|0	0|0	0|0	3,0	1,0	7,0	1,0	0,0	1,0	5,0	1,0	2,0	6,4	9,0	8,0	6,0	9,0	6,0	2,0	1,0	13,0	intergenic	-	-
Os03g0744300(dist=1768),Os03g0744501(dist=3994)	30554857	30554859	TTT	-	Deletion	.	58	0|0	0|1	0|0	0|0	0|0	.|.	0|0	0|0	0|0	0|0	0|0	0|0	0|0	0|0	0|0	0|0	0|0	0|0	2,0	7,6	8,0	3,0	3,0	0,0	3,0	2,0	9,0	13,0	11,0	8,0	11,0	12,0	5,0	10,0	8,0	11,0	intergenic	-	-
Os03g0744300(dist=1391),Os03g0744501(dist=4373)	30554480	30554480	A	G	SNP	.	49.5713	0|0	0|0	0|0	0|0	.|.	0|0	0|0	0|0	0|0	0|1	0|0	0|0	0|0	0|0	0|0	0|0	0|0	0|0	3,0	1,0	7,0	1,0	0,0	1,0	5,0	1,0	2,0	6,4	9,0	8,0	6,0	9,0	6,0	2,0	1,0	13,0	intergenic	-	-
Os03g0744300(dist=1768),Os03g0744501(dist=3994)	30554857	30554859	TTT	-	Deletion	.	58	0|0	0|1	0|0	0|0	0|0	.|.	0|0	0|0	0|0	0|0	0|0	0|0	0|0	0|0	0|0	0|0	0|0	0|0	2,0	7,6	8,0	3,0	3,0	0,0	3,0	2,0	9,0	13,0	11,0	8,0	11,0	12,0	5,0	10,0	8,0	11,0	intergenic	-	-
Os03g0744501,Os03g0744600	30559940	30559940	T	C	SNP	.	27.0935	.|.	.|.	.|.	.|.	.|.	.|.	.|.	.|.	.|.	.|.	.|.	.|.	0|0	0|1	.|.	.|.	.|.	.|.	0,0	0,0	0,0	0,0	0,0	0,0	0,0	0,0	0,0	0,0	0,0	0,0	1,0	2,2	0,0	0,0	0,0	0,0	downstream	-	-
Os03g0744600	30561848	30561848	T	G	SNP	.	52	0|0	.|.	0|1	0|0	0|0	0|0	0|0	0|0	0|0	.|.	0|0	0|0	0|0	0|0	0|0	0|0	0|0	0|0	4,0	0,0	5,4	5,0	2,0	3,0	2,0	3,0	3,0	0,0	7,0	3,0	23,0	9,0	20,0	12,0	22,0	20,0	intronic	-	-
Os03g0744650	30565794	30565794	G	A	SNP	.	32.4095	0|0	0|1	0|0	0|0	0|0	0|0	0|0	0|0	0|0	0|0	0|0	0|0	0|0	0|0	0|0	0|0	0|0	0|0	75,0	18,5	79,0	60,0	40,0	53,0	68,0	66,0	64,0	157,0	138,0	142,0	219,0	216,0	205,1	190,0	225,0	196,0	exonic	synonymous SNV	Os03g0744650:Os03t0744650-00:exon1:c.C474T:p.C158C,
Os03g0744650(dist=1068),Os03g0744675(dist=7225)	30567335	30567335	A	G	SNP	.	22.9023	0|0	0|0	0|0	0|0	0|0	0|0	0|1	0|0	0|0	0|0	0|0	0|0	0|0	0|0	0|0	0|0	0|0	0|0	22,0	10,0	22,0	17,0	28,0	14,0	15,4	12,0	5,0	59,0	49,0	45,0	94,0	96,0	102,0	130,0	155,0	141,0	intergenic	-	-
Os03g0744650(dist=2297),Os03g0744675(dist=5996)	30568564	30568564	A	G	SNP	.	213	0|0	.|.	0|0	0|0	0|0	0|0	0|0	.|.	0|0	0|1	0|0	.|.	0|0	0|0	0|0	0|0	0|0	0|0	1,0	0,0	2,0	7,0	6,0	4,0	6,0	0,0	8,0	1,8	1,0	0,0	13,0	7,0	7,0	8,0	18,0	14,0	intergenic	-	-
Os03g0744650(dist=2832),Os03g0744675(dist=5461)	30569099	30569099	C	T	SNP	.	37.2469	0|0	0|0	0|0	0|0	0|0	0|0	0|0	0|1	0|0	0|0	0|0	0|0	0|0	0|0	0|0	0|0	0|0	0|0	13,0	2,0	3,0	5,0	2,0	1,0	2,0	3,3	1,0	12,0	17,0	10,0	35,0	41,3	36,0	38,1	56,0	52,0	intergenic	-	-
Os03g0744650(dist=3083),Os03g0744675(dist=5210)	30569350	30569350	G	T	SNP	.	106	.|.	.|.	.|.	0|0	0|0	.|.	0|0	0|0	0|1	0|0	.|.	.|.	0|0	0|0	0|0	0|0	0|0	0|0	0,0	0,0	0,0	2,0	7,0	0,0	1,0	4,0	1,9	7,0	0,0	0,0	11,0	18,0	12,0	33,0	22,0	23,0	intergenic	-	-
Os03g0744650(dist=4423),Os03g0744675(dist=3870)	30570690	30570690	G	C	SNP	.	21.1272	0|0	0|0	0|0	0|0	.|.	0|0	0|0	.|.	.|.	0|1	0|0	0|0	0|0	0|0	0|0	0|0	0|0	0|0	8,0	5,0	12,0	4,0	0,0	2,0	1,0	0,0	0,0	16,4	6,0	10,0	26,0	24,0	31,0	33,0	48,0	41,0	intergenic	-	-
Os03g0744650(dist=4883),Os03g0744675(dist=3410)	30571150	30571150	G	A	SNP	.	113	0|0	0|0	0|1	0|0	0|0	0|0	0|0	0|0	0|0	0|0	0|0	0|0	0|0	0|0	0|0	0|0	0|0	0|0	18,0	9,0	9,4	20,0	21,0	25,0	14,0	4,0	17,0	36,0	43,0	78,0	92,0	128,0	128,0	124,0	127,0	142,0	intergenic	-	-
Os03g0744650(dist=5528),Os03g0744675(dist=2765)	30571795	30571795	G	A	SNP	.	43.394	0|0	0|1	0|0	0|0	0|0	0|0	0|0	0|0	0|0	0|0	0|0	0|0	0|0	0|0	0|0	0|0	0|0	0|0	28,0	18,6	22,0	31,0	50,0	36,0	48,0	31,0	40,0	48,0	104,0	75,0	178,0	154,0	170,0	193,0	188,0	182,0	intergenic	-	-
Os03g0744650(dist=6300),Os03g0744675(dist=1993)	30572567	30572567	G	A	SNP	.	43.4281	0|0	0|0	0|0	.|.	0|0	0|1	0|0	0|0	0|0	0|0	0|0	0|0	0|0	0|0	0|0	0|0	0|0	0|0	11,0	1,0	7,0	0,0	26,0	7,2	17,0	17,0	8,0	42,0	41,0	28,0	80,0	82,0	100,0	108,0	105,0	107,0	intergenic	-	-
Os03g0744650(dist=1068),Os03g0744675(dist=7225)	30567335	30567335	A	G	SNP	.	22.9023	0|0	0|0	0|0	0|0	0|0	0|0	0|1	0|0	0|0	0|0	0|0	0|0	0|0	0|0	0|0	0|0	0|0	0|0	22,0	10,0	22,0	17,0	28,0	14,0	15,4	12,0	5,0	59,0	49,0	45,0	94,0	96,0	102,0	130,0	155,0	141,0	intergenic	-	-
Os03g0744650(dist=2297),Os03g0744675(dist=5996)	30568564	30568564	A	G	SNP	.	213	0|0	.|.	0|0	0|0	0|0	0|0	0|0	.|.	0|0	0|1	0|0	.|.	0|0	0|0	0|0	0|0	0|0	0|0	1,0	0,0	2,0	7,0	6,0	4,0	6,0	0,0	8,0	1,8	1,0	0,0	13,0	7,0	7,0	8,0	18,0	14,0	intergenic	-	-
Os03g0744650(dist=2832),Os03g0744675(dist=5461)	30569099	30569099	C	T	SNP	.	37.2469	0|0	0|0	0|0	0|0	0|0	0|0	0|0	0|1	0|0	0|0	0|0	0|0	0|0	0|0	0|0	0|0	0|0	0|0	13,0	2,0	3,0	5,0	2,0	1,0	2,0	3,3	1,0	12,0	17,0	10,0	35,0	41,3	36,0	38,1	56,0	52,0	intergenic	-	-
Os03g0744650(dist=3083),Os03g0744675(dist=5210)	30569350	30569350	G	T	SNP	.	106	.|.	.|.	.|.	0|0	0|0	.|.	0|0	0|0	0|1	0|0	.|.	.|.	0|0	0|0	0|0	0|0	0|0	0|0	0,0	0,0	0,0	2,0	7,0	0,0	1,0	4,0	1,9	7,0	0,0	0,0	11,0	18,0	12,0	33,0	22,0	23,0	intergenic	-	-
Os03g0744650(dist=4423),Os03g0744675(dist=3870)	30570690	30570690	G	C	SNP	.	21.1272	0|0	0|0	0|0	0|0	.|.	0|0	0|0	.|.	.|.	0|1	0|0	0|0	0|0	0|0	0|0	0|0	0|0	0|0	8,0	5,0	12,0	4,0	0,0	2,0	1,0	0,0	0,0	16,4	6,0	10,0	26,0	24,0	31,0	33,0	48,0	41,0	intergenic	-	-
Os03g0744650(dist=4883),Os03g0744675(dist=3410)	30571150	30571150	G	A	SNP	.	113	0|0	0|0	0|1	0|0	0|0	0|0	0|0	0|0	0|0	0|0	0|0	0|0	0|0	0|0	0|0	0|0	0|0	0|0	18,0	9,0	9,4	20,0	21,0	25,0	14,0	4,0	17,0	36,0	43,0	78,0	92,0	128,0	128,0	124,0	127,0	142,0	intergenic	-	-
Os03g0744650(dist=5528),Os03g0744675(dist=2765)	30571795	30571795	G	A	SNP	.	43.394	0|0	0|1	0|0	0|0	0|0	0|0	0|0	0|0	0|0	0|0	0|0	0|0	0|0	0|0	0|0	0|0	0|0	0|0	28,0	18,6	22,0	31,0	50,0	36,0	48,0	31,0	40,0	48,0	104,0	75,0	178,0	154,0	170,0	193,0	188,0	182,0	intergenic	-	-
Os03g0744650(dist=6300),Os03g0744675(dist=1993)	30572567	30572567	G	A	SNP	.	43.4281	0|0	0|0	0|0	.|.	0|0	0|1	0|0	0|0	0|0	0|0	0|0	0|0	0|0	0|0	0|0	0|0	0|0	0|0	11,0	1,0	7,0	0,0	26,0	7,2	17,0	17,0	8,0	42,0	41,0	28,0	80,0	82,0	100,0	108,0	105,0	107,0	intergenic	-	-
Os03g0744675	30575413	30575413	G	A	SNP	.	20.9976	0|0	0|0	0|0	0|0	0|0	0|0	0|0	0|0	0|0	0|1	0|0	0|0	0|0	0|0	0|0	0|0	0|0	0|0	37,0	8,0	14,0	24,0	23,0	24,0	13,0	24,0	18,0	37,8	44,0	32,0	117,0	136,0	134,0	168,0	202,0	146,0	exonic	nonsynonymous SNV	Os03g0744675:Os03t0744675-00:exon11:c.C2324T:p.S775L,
Os03g0744675	30576255	30576255	C	T	SNP	.	71	0|0	0|0	0|0	0|0	0|1	0|0	0|0	0|0	0|0	0|0	0|0	0|0	0|0	0|0	0|0	0|0	0|0	0|0	57,0	17,0	21,0	48,0	34,5	17,0	28,0	41,0	17,0	80,0	49,0	52,0	201,0	169,0	203,0	220,0	225,0	226,0	exonic	nonsynonymous SNV	Os03g0744675:Os03t0744675-00:exon10:c.G1696A:p.V566I,
Os03g0744675	30576785	30576785	T	G	SNP	.	72	0|0	0|0	0|0	0|0	0|0	0|0	0|0	0|1	0|0	0|0	0|0	0|0	0|0	0|0	0|0	0|0	0|0	0|0	59,0	18,0	35,0	33,0	37,0	44,0	31,0	14,7	37,0	105,0	80,0	90,0	154,0	165,0	147,0	210,0	218,0	194,0	exonic	nonsynonymous SNV	Os03g0744675:Os03t0744675-00:exon10:c.A1166C:p.N389T,
Os03g0744675	30578724	30578724	T	A	SNP	.	23.1161	0|0	.|.	0|0	.|.	.|.	.|.	.|.	.|.	.|.	0|1	.|.	0|0	0|0	0|0	0|0	0|0	0|0	0|0	3,0	0,0	4,0	0,0	0,0	0,0	0,0	0,0	0,0	0,2	0,0	3,0	18,0	13,0	17,0	18,0	6,0	8,0	intronic	-	-
Os03g0744675	30579343	30579343	C	-	Deletion	.	82	0|0	.|.	0|0	0|0	0|0	.|.	0|0	0|0	.|.	0|0	.|.	.|.	0|1	0|0	0|0	0|0	0|0	0|0	4,0	0,0	8,0	1,0	1,0	0,0	4,0	1,0	0,0	7,0	0,0	0,0	7,6	22,0	12,0	28,0	13,0	21,0	intronic	-	-
Os03g0744675	30579487	30579487	G	A	SNP	.	123	0|0	0|0	0|0	0|0	0|0	0|0	0|0	0|0	0|0	0|0	0|1	0|0	0|0	0|0	0|0	0|0	0|0	0|0	14,0	4,0	21,0	10,0	38,0	18,0	23,0	13,0	15,0	45,0	16,5	32,0	121,0	90,0	110,0	127,0	114,0	112,0	exonic	nonsynonymous SNV	Os03g0744675:Os03t0744675-00:exon5:c.C571T:p.L191F,
Os03g0744675	30580128	30580128	C	T	SNP	.	999	0|1	0|0	0|1	0|1	0|1	0|1	0|1	0|0	0|0	0|1	0|1	0|1	0|1	0|1	0|1	0|1	0|1	0|1	27,6	11,0	24,12	17,1	8,8	13,6	26,4	21,2	37,0	34,4	54,11	38,4	91,14	80,13	76,12	82,9	66,11	101,18	exonic	nonsynonymous SNV	Os03g0744675:Os03t0744675-00:exon2:c.G236A:p.G79E,
Os03g0744675	30581296	30581296	T	C	SNP	.	44.276	0|0	.|.	0|0	0|0	0|0	0|0	.|.	.|.	0|0	0|0	0|0	0|0	0|0	0|0	0|0	0|0	0|0	0|1	4,0	0,0	7,0	1,0	10,0	5,0	0,0	0,0	3,0	7,0	18,0	1,0	12,0	14,0	14,0	12,0	14,0	7,2	intronic	-	-
Os03g0744675	30581780	30581780	C	T	SNP	.	66	0|0	0|0	.|.	0|0	.|.	0|0	0|0	0|0	0|0	0|0	0|1	0|0	0|0	0|0	0|0	0|0	0|1	0|0	7,0	3,0	0,0	6,0	0,0	2,0	13,0	7,0	5,0	1,0	2,3	1,0	6,0	5,0	2,0	14,0	9,2	7,0	intronic	-	-
Os03g0744700	30593622	30593622	G	C	SNP	.	83	0|0	0|1	0|0	0|0	0|0	0|0	0|0	0|0	0|0	0|0	0|0	0|0	0|0	0|0	0|0	0|0	0|0	0|0	11,0	3,6	16,0	15,0	9,0	5,0	12,0	17,0	4,0	21,0	4,0	11,0	5,0	12,0	3,0	7,0	7,0	15,0	intronic	-	-
Os03g0744700	30594034	30594034	G	C	SNP	.	24.36	0|0	.|.	0|0	.|.	0|0	0|0	0|1	.|.	.|.	0|0	.|.	.|.	0|0	0|0	0|0	.|.	0|0	0|0	2,0	0,0	4,0	0,0	1,0	1,0	0,2	0,0	0,0	2,0	0,0	0,0	1,0	4,0	6,0	0,0	4,0	2,0	intronic	-	-
Os03g0744800(Os03t0744800-02:c.*1925C>T)	30596999	30596999	G	A	SNP	.	100	0|0	0|0	0|0	0|0	0|1	0|0	0|0	0|0	.|.	0|0	0|0	0|0	0|0	0|0	0|0	0|0	0|0	0|0	5,0	5,0	7,0	9,0	1,3	4,0	10,0	2,0	0,0	14,0	6,0	4,0	13,0	8,0	12,0	16,0	18,0	20,0	UTR3	-	-
Os03g0744800(Os03t0744800-02:c.*1707G>C)	30597217	30597217	C	G	SNP	.	39.0709	0|1	0|0	0|0	0|0	0|0	0|0	0|0	0|0	0|0	0|0	.|.	0|0	0|0	0|0	0|0	0|0	0|0	0|0	2,3	12,0	7,0	6,0	6,0	5,0	5,0	7,0	5,0	2,0	0,0	6,0	8,0	5,0	10,0	14,0	13,0	12,0	UTR3	-	-
Os03g0744800	30597692	30597692	A	G	SNP	.	39.514	0|0	0|0	0|0	0|0	0|0	0|0	0|1	0|0	0|0	0|0	0|0	0|0	0|0	0|0	0|0	0|0	0|0	0|0	17,0	3,0	13,0	5,0	24,0	13,0	15,4	10,0	5,0	11,0	28,0	31,0	76,0	39,0	63,0	71,0	63,0	77,0	exonic	synonymous SNV	Os03g0744800:Os03t0744800-01:exon3:c.T489C:p.R163R,
Os03g0744800(Os03t0744800-02:c.*728T>C)	30598377	30598377	A	G	SNP	.	20.7078	0|0	0|0	0|0	0|1	0|0	0|0	0|0	0|0	0|0	0|0	0|0	0|0	0|0	0|0	0|0	0|0	0|0	0|0	6,0	7,0	7,0	0,2	8,0	4,0	1,0	1,0	4,0	1,0	17,0	11,0	19,0	17,0	28,0	19,0	26,0	33,0	UTR3	-	-
Os03g0744800(Os03t0744800-02:c.*321T>C)	30598784	30598784	A	G	SNP	.	65	0|0	0|0	0|0	0|0	0|1	0|0	0|0	0|0	0|0	0|0	0|0	0|0	0|0	0|0	0|0	0|0	0|0	0|0	7,0	8,0	5,0	9,0	6,5	8,0	13,0	5,0	8,0	17,0	26,0	25,0	15,0	18,0	24,0	24,0	21,0	19,0	UTR3	-	-
Os03g0744800	30599365	30599365	C	T	SNP	.	26.5819	0|0	0|0	0|0	0|0	0|0	0|0	0|1	0|0	0|0	0|0	0|0	0|0	0|0	0|0	0|0	0|0	0|0	0|0	16,0	1,0	13,0	8,0	7,0	2,0	11,4	13,0	24,0	8,0	26,0	19,0	20,0	33,0	20,0	42,0	38,0	38,0	exonic	nonsynonymous SNV	Os03g0744800:Os03t0744800-02:exon1:c.G4A:p.A2T,Os03g0744800:Os03t0744800-01:exon1:c.G4A:p.A2T,
Os03g0745100	30611086	30611086	C	T	SNP	.	26.9516	.|.	.|.	.|.	.|.	.|.	.|.	.|.	.|.	.|.	.|.	.|.	0|0	0|0	0|0	0|1	0|0	0|0	0|0	0,0	0,0	0,0	0,0	0,0	0,0	0,0	0,0	0,0	0,0	0,0	1,0	4,0	17,0	5,3	15,0	13,0	8,0	exonic	nonsynonymous SNV	Os03g0745100:Os03t0745100-00:exon1:c.G410A:p.R137H,
Os03g0745100(dist=2613),Os03g0745400(dist=12576)	30614108	30614108	G	A	SNP	.	28.7837	.|.	.|.	.|.	.|.	0|0	.|.	.|.	0|0	.|.	.|.	.|.	.|.	0|1	.|.	.|.	0|0	0|0	0|0	0,0	0,0	0,0	0,0	2,0	0,0	0,0	1,0	0,0	0,0	0,0	0,0	0,2	0,0	0,0	2,0	1,0	1,0	intergenic	-	-
Os03g0745100(dist=2718),Os03g0745400(dist=12471)	30614213	30614213	A	C	SNP	.	40.4067	0|0	.|.	0|0	0|0	0|0	0|1	.|.	0|0	.|.	.|.	0|0	0|0	0|0	0|0	0|0	0|0	0|0	0|0	4,0	0,0	2,0	3,0	4,0	2,3	0,0	1,0	0,0	0,0	8,0	3,0	5,0	4,0	3,0	7,0	11,0	2,0	intergenic	-	-
Os03g0745100(dist=2613),Os03g0745400(dist=12576)	30614108	30614108	G	A	SNP	.	28.7837	.|.	.|.	.|.	.|.	0|0	.|.	.|.	0|0	.|.	.|.	.|.	.|.	0|1	.|.	.|.	0|0	0|0	0|0	0,0	0,0	0,0	0,0	2,0	0,0	0,0	1,0	0,0	0,0	0,0	0,0	0,2	0,0	0,0	2,0	1,0	1,0	intergenic	-	-
Os03g0745100(dist=2718),Os03g0745400(dist=12471)	30614213	30614213	A	C	SNP	.	40.4067	0|0	.|.	0|0	0|0	0|0	0|1	.|.	0|0	.|.	.|.	0|0	0|0	0|0	0|0	0|0	0|0	0|0	0|0	4,0	0,0	2,0	3,0	4,0	2,3	0,0	1,0	0,0	0,0	8,0	3,0	5,0	4,0	3,0	7,0	11,0	2,0	intergenic	-	-
Os03g0745400	30628557	30628557	T	C	SNP	.	214	0|0	0|0	0|0	0|0	0|0	0|0	0|0	0|0	0|1	0|0	0|0	0|0	0|0	0|0	0|0	0|0	0|0	0|0	33,0	6,0	40,0	34,0	37,0	26,0	31,0	39,0	5,10	42,0	12,0	38,0	48,0	47,0	86,0	62,0	70,0	68,0	intronic	-	-
Os03g0745400	30629794	30629794	G	T	SNP	.	46.9446	0|0	.|.	0|0	0|0	0|0	0|0	0|0	0|0	0|0	0|0	0|0	0|1	0|0	0|0	0|0	0|0	0|0	0|0	4,0	0,0	2,0	2,0	7,0	6,0	2,0	2,0	1,0	7,0	7,0	6,2	13,0	11,0	6,0	9,0	16,0	22,0	intronic	-	-
Os03g0745400(Os03t0745400-01:c.*874T>C)	30629900	30629900	T	C	SNP	.	81	0|0	0|0	0|0	0|0	0|0	0|0	0|0	0|0	.|.	0|0	0|1	0|0	0|0	0|0	0|0	0|0	0|0	0|0	8,0	8,0	5,0	10,0	6,0	9,0	1,0	1,0	0,0	11,0	10,7	13,0	32,0	22,0	22,0	18,0	16,0	39,0	UTR3	-	-
Os03g0745400	30629971	30629971	G	A	SNP	.	104	0|0	0|0	0|0	0|0	0|0	0|0	0|0	0|0	0|0	0|0	0|0	0|0	0|1	0|0	0|0	0|0	0|0	0|1	11,0	3,0	2,0	9,1	15,0	15,0	6,0	7,0	5,0	16,0	7,0	9,0	5,5	16,0	23,0	19,0	11,1	22,3	intronic	-	-
Os03g0745400	30630102	30630102	T	C	SNP	.	44.041	0|0	0|0	0|0	0|0	0|1	0|0	0|0	0|0	0|0	0|0	0|0	0|0	0|0	0|0	0|0	0|0	0|0	0|0	22,0	3,0	6,0	16,0	14,5	16,0	9,0	16,0	5,0	21,0	6,0	8,0	12,0	17,0	24,0	24,0	15,0	35,0	intronic	-	-
Os03g0745400(Os03t0745400-01:c.*1302_*1304delCCC)	30630507	30630509	CCC	-	Deletion	.	83	0|0	0|0	0|0	0|0	0|0	0|0	0|0	0|0	0|1	0|0	0|0	0|0	0|0	0|0	0|0	0|0	0|0	0|0	15,0	6,0	8,0	20,0	5,0	15,0	14,0	5,0	13,11	18,0	30,0	18,0	62,0	29,0	64,0	41,0	65,0	40,0	UTR3	-	-
Os03g0745400	30631587	30631587	C	T	SNP	.	76	0|1	0|0	0|0	0|0	0|0	0|0	0|0	0|0	.|.	0|0	0|0	0|0	0|0	0|0	0|0	0|0	0|0	0|0	10,3	6,0	14,0	7,0	7,0	1,0	8,0	5,0	0,0	3,0	4,0	3,0	12,0	18,0	16,0	7,0	12,0	17,0	downstream	-	-
Os03g0745550	30633817	30633817	T	C	SNP	.	82	0|0	.|.	0|1	0|0	0|0	0|0	0|0	.|.	.|.	0|0	.|.	.|.	0|0	0|0	0|0	0|0	0|0	0|0	1,0	0,0	2,6	6,0	1,0	11,0	4,0	0,0	0,0	5,0	0,0	0,0	10,0	8,0	5,0	11,0	13,0	11,0	intronic	-	-
Os03g0745550(Os03t0745550-01:c.-87C>T)	30633877	30633877	C	T	SNP	.	32.3703	0|0	0|0	0|0	0|0	0|0	0|0	0|0	0|0	0|0	0|0	0|0	0|0	0|1	0|0	0|0	0|0	0|0	0|0	8,0	1,0	12,0	11,0	12,0	24,0	5,0	26,0	27,0	16,0	19,0	3,0	24,3	46,0	14,0	33,0	38,0	36,0	UTR5	-	-
Os03g0745550(Os03t0745550-01:c.-13C>T)	30633951	30633951	C	T	SNP	.	196	0|0	.|.	0|0	0|0	0|0	0|0	0|0	0|0	0|0	0|0	0|1	0|0	0|0	0|0	0|0	0|0	0|0	0|0	10,0	0,0	13,0	6,0	13,0	27,0	18,0	19,0	19,0	20,0	11,8	1,0	34,0	50,0	23,0	43,0	47,0	51,0	UTR5	-	-
Os03g0745550	30634295	30634295	G	A	SNP	.	28.3256	0|0	0|0	0|0	0|0	0|0	0|0	0|0	0|1	0|0	0|0	0|0	0|0	0|0	0|0	0|0	0|0	0|0	0|0	15,0	4,0	11,0	7,0	5,0	14,0	7,0	6,3	4,0	2,0	14,0	2,0	22,0	16,0	19,0	45,0	33,0	33,0	intronic	-	-
Os03g0745550	30635557	30635557	A	G	SNP	.	51	0|0	0|0	0|0	0|0	0|0	0|0	0|0	0|0	0|1	0|0	0|0	0|1	0|0	0|0	0|0	0|0	0|0	0|0	13,0	2,0	12,0	8,0	20,0	12,0	26,0	27,0	15,2	15,0	4,0	4,4	55,0	59,0	38,0	49,0	43,0	57,0	exonic	nonsynonymous SNV	Os03g0745550:Os03t0745550-01:exon3:c.A200G:p.K67R,
Os03g0745550	30635559	30635559	G	A	SNP	.	21.2549	0|0	0|0	0|0	0|0	0|0	0|0	0|0	0|0	0|1	0|0	0|0	0|0	0|0	0|0	0|0	0|0	0|0	0|0	16,0	2,0	13,0	11,0	23,0	12,0	25,0	30,0	14,2	14,0	5,0	8,0	68,0	61,0	42,0	52,0	43,0	63,0	exonic	nonsynonymous SNV	Os03g0745550:Os03t0745550-01:exon3:c.G202A:p.G68S,
Os03g0745550	30635937	30635937	C	T	SNP	.	46.5398	0|0	0|0	0|0	0|1	0|0	0|0	0|0	0|0	0|0	0|0	0|0	0|0	0|0	0|0	0|0	0|0	0|0	0|0	7,0	4,0	5,0	6,2	8,0	17,0	10,0	14,0	12,0	7,0	4,0	9,0	24,0	24,0	17,0	17,0	45,0	30,0	intronic	-	-
Os03g0745550(dist=1199),Os03g0745600(dist=1330)	30637689	30637694	tatata	-	Deletion	.	24.5431	.|.	.|.	.|.	.|.	.|.	.|.	.|.	.|.	.|.	.|.	.|.	.|.	.|.	.|.	.|.	1|1	.|.	.|.	0,0	0,0	0,0	0,0	0,0	0,0	0,0	0,0	0,0	0,0	0,0	0,0	0,0	0,0	0,0	1,1	0,0	0,0	intergenic	-	-
Os03g0745550(dist=1199),Os03g0745600(dist=1330)	30637689	30637694	tatata	-	Deletion	.	24.5431	.|.	.|.	.|.	.|.	.|.	.|.	.|.	.|.	.|.	.|.	.|.	.|.	.|.	.|.	.|.	1|1	.|.	.|.	0,0	0,0	0,0	0,0	0,0	0,0	0,0	0,0	0,0	0,0	0,0	0,0	0,0	0,0	0,0	1,1	0,0	0,0	intergenic	-	-
Os03g0745600	30639322	30639322	C	A	SNP	.	31.3494	0|0	0|0	.|.	0|0	0|0	0|0	.|.	0|0	0|0	0|1	0|0	0|0	0|0	0|0	0|0	0|0	0|0	0|0	3,0	8,0	0,0	4,0	5,0	2,0	0,0	2,0	11,0	5,3	5,0	4,0	6,0	2,0	5,0	6,0	7,0	8,0	exonic	nonsynonymous SNV	Os03g0745600:Os03t0745600-01:exon1:c.C203A:p.A68D,
Os03g0745600	30639923	30639923	T	C	SNP	.	37.3627	.|.	.|.	.|.	0|0	0|0	0|0	0|0	0|0	.|.	.|.	0|0	0|0	0|0	0|0	0|0	0|0	0|1	0|0	0,0	0,0	0,0	1,0	3,0	2,0	3,0	2,0	0,0	0,0	4,0	2,0	1,0	1,0	3,0	6,0	8,4	8,0	exonic	nonsynonymous SNV	Os03g0745600:Os03t0745600-01:exon2:c.T707C:p.L236P,
Os03g0746000	30659738	30659738	G	A	SNP	.	942	.|.	.|.	.|.	1|1	.|.	.|.	1|1	.|.	1|1	1|1	.|.	1|1	.|.	1|1	.|.	1|1	1|1	1|1	0,0	0,0	0,0	0,2	0,0	0,0	0,2	0,0	0,13	0,4	0,0	0,2	0,0	0,3	0,0	0,2	0,3	0,3	exonic	nonsynonymous SNV	Os03g0746000:Os03t0746000-01:exon1:c.G259A:p.E87K,Os03g0746000:Os03t0746000-02:exon1:c.G259A:p.E87K,
Os03g0746000	30659783	30659789	TATATAT	-	Deletion	.	44.1464	.|.	.|.	.|.	0|0	.|.	0|0	0|0	.|.	0|0	.|.	.|.	0|0	.|.	0|1	0|0	0|0	0|0	0|0	0,0	0,0	0,0	2,0	0,0	5,0	2,0	0,0	13,0	0,0	0,0	3,0	0,0	1,2	1,0	2,0	4,0	3,0	exonic	frameshift deletion	Os03g0746000:Os03t0746000-01:exon1:c.304_310del:p.Y102fs,Os03g0746000:Os03t0746000-02:exon1:c.304_310del:p.Y102fs,
Os03g0746400	30678519	30678519	G	C	SNP	.	96	0|1	.|.	.|.	0|0	0|0	0|0	0|0	0|0	.|.	0|0	0|0	0|0	0|0	0|0	0|0	0|0	0|0	0|0	15,4	0,0	0,0	9,0	8,0	7,0	11,0	11,0	0,0	8,0	1,0	24,0	21,0	28,0	48,0	21,0	37,0	33,0	exonic	nonsynonymous SNV	Os03g0746400:Os03t0746400-01:exon1:c.G1300C:p.A434P,
Os03g0746400	30678581	30678584	CTCT	-	Deletion	.	20.0669	0|0	.|.	.|.	0|0	0|0	0|1	0|0	0|0	.|.	0|0	0|0	0|0	0|0	0|0	0|0	0|0	0|0	0|0	27,0	0,0	0,0	13,0	8,0	8,2	15,0	15,0	0,0	13,0	10,0	29,0	41,0	50,0	53,0	31,0	46,0	47,0	exonic	frameshift deletion	Os03g0746400:Os03t0746400-01:exon1:c.1362_1365del:p.Y454fs,
Os03g0746500	30681533	30681533	G	-	Deletion	.	21.9661	0|0	.|.	0|0	0|0	0|0	0|0	0|0	0|0	.|.	0|0	0|0	0|0	0|0	0|1	0|0	0|0	0|0	0|0	5,0	0,0	10,0	4,0	1,0	12,0	2,0	1,0	0,0	17,0	5,0	14,0	48,0	24,5	36,0	52,0	48,0	66,0	exonic	frameshift deletion	Os03g0746500:Os03t0746500-01:exon13:c.1354delC:p.R452fs,
Os03g0746500	30686228	30686228	A	G	SNP	.	73	.|.	0|0	.|.	.|.	.|.	.|.	.|.	.|.	.|.	0|0	0|1	.|.	0|0	0|0	0|0	0|0	0|0	0|0	0,0	3,0	0,0	0,0	0,0	0,0	0,0	0,0	0,0	1,0	4,5	0,0	6,0	10,0	2,0	3,0	1,0	5,0	intronic	-	-
Os03g0746500	30686552	30686552	G	A	SNP	.	65	0|0	0|0	0|0	0|0	0|0	0|1	0|0	0|0	0|0	0|0	0|0	0|0	0|0	0|0	0|0	0|0	0|0	0|0	8,0	8,0	12,0	9,0	13,0	6,5	5,0	8,0	8,0	27,0	6,0	16,0	27,0	25,0	32,0	27,0	21,0	33,0	exonic	stopgain	Os03g0746500:Os03t0746500-01:exon6:c.C745T:p.R249X,Os03g0746500:Os03t0746500-02:exon2:c.C169T:p.R57X,
Os03g0746600	30689742	30689742	G	C	SNP	.	152	0|0	.|.	.|.	0|0	0|0	0|0	0|0	0|1	.|.	.|.	.|.	.|.	0|0	0|0	0|0	0|0	0|0	0|0	2,0	0,0	0,0	8,0	9,0	9,0	1,0	5,5	0,0	0,0	0,0	0,0	4,0	5,0	3,0	10,0	7,0	3,0	exonic	nonsynonymous SNV	Os03g0746600:Os03t0746600-01:exon2:c.G31C:p.E11Q,
Os03g0746600	30690157	30690157	G	C	SNP	.	155	0|1	0|0	.|.	0|0	0|0	.|.	0|0	.|.	0|0	.|.	0|0	0|0	0|0	0|0	0|0	0|0	0|0	0|0	6,8	3,0	0,0	6,0	7,0	0,0	12,0	0,0	7,0	0,0	2,0	3,0	12,0	30,0	20,0	20,0	15,0	32,0	exonic	nonsynonymous SNV	Os03g0746600:Os03t0746600-01:exon3:c.G206C:p.R69P,
Os03g0746600	30690495	30690495	A	T	SNP	.	41.2259	0|0	0|0	0|0	0|0	0|0	.|.	.|.	0|0	0|0	.|.	.|.	0|0	0|0	0|0	0|0	0|0	0|1	0|0	6,0	3,0	7,0	3,0	2,0	0,0	0,0	12,0	5,0	0,0	0,0	4,0	12,0	17,0	19,0	39,0	19,3	31,0	exonic	nonsynonymous SNV	Os03g0746600:Os03t0746600-01:exon4:c.A463T:p.I155F,
Os03g0746600(Os03t0746600-01:c.*77T>C)	30692231	30692231	T	C	SNP	.	42.672	0|0	.|.	0|0	0|0	0|0	.|.	0|0	.|.	0|0	0|0	0|0	0|0	0|0	0|0	0|0	0|0	0|0	0|1	10,0	0,0	4,0	4,0	1,0	0,0	3,0	0,0	7,0	2,0	3,0	3,0	22,0	20,0	22,0	18,0	30,0	21,3	UTR3	-	-
Os03g0746700(dist=3576),Os03g0746800(dist=1719)	30699530	30699530	T	C	SNP	.	110	.|.	.|.	.|.	.|.	0|0	.|.	.|.	.|.	.|.	.|.	0|0	0|1	0|0	0|0	0|0	.|.	.|.	.|.	0,0	0,0	0,0	0,0	2,0	0,0	0,0	0,0	0,0	0,0	1,0	0,3	1,0	3,0	4,0	0,0	0,0	0,0	intergenic	-	-
Os03g0746700(dist=3576),Os03g0746800(dist=1719)	30699530	30699530	T	C	SNP	.	110	.|.	.|.	.|.	.|.	0|0	.|.	.|.	.|.	.|.	.|.	0|0	0|1	0|0	0|0	0|0	.|.	.|.	.|.	0,0	0,0	0,0	0,0	2,0	0,0	0,0	0,0	0,0	0,0	1,0	0,3	1,0	3,0	4,0	0,0	0,0	0,0	intergenic	-	-
Os03g0746800	30700276	30700276	C	G	SNP	.	93	.|.	.|.	.|.	.|.	.|.	.|.	.|.	.|.	.|.	.|.	1|1	.|.	.|.	.|.	0|0	.|.	0|0	.|.	0,0	0,0	0,0	0,0	0,0	0,0	0,0	0,0	0,0	0,0	0,5	0,0	0,0	0,0	1,0	0,0	1,0	0,0	downstream	-	-
Os03g0746800	30704424	30704424	G	C	SNP	.	20.9502	.|.	.|.	.|.	.|.	0|1	.|.	.|.	.|.	.|.	.|.	0|0	0|0	0|0	0|0	.|.	.|.	0|0	0|0	0,0	0,0	0,0	0,0	0,1	0,0	0,0	0,0	0,0	0,0	3,0	5,0	5,0	2,0	0,0	0,0	4,0	4,0	intronic	-	-
Os03g0747100	30722751	30722751	A	C	SNP	.	51	.|.	.|.	.|.	.|.	.|.	1|1	.|.	.|.	.|.	.|.	1|1	.|.	.|.	.|.	.|.	.|.	.|.	.|.	0,0	0,0	0,0	0,0	0,0	0,1	0,0	0,0	0,0	0,0	0,1	0,0	0,0	0,0	0,0	0,0	0,0	0,0	upstream	-	-
Os03g0747100	30722752	30722752	C	A	SNP	.	51	.|.	.|.	.|.	.|.	.|.	1|1	.|.	.|.	.|.	.|.	1|1	.|.	.|.	.|.	.|.	.|.	.|.	.|.	0,0	0,0	0,0	0,0	0,0	0,1	0,0	0,0	0,0	0,0	0,1	0,0	0,0	0,0	0,0	0,0	0,0	0,0	upstream	-	-
Os03g0747100	30723510	30723513	GCGG	-	Deletion	.	370	1|1	.|.	.|.	.|.	0|1	.|.	.|.	.|.	.|.	0|1	0|1	0|1	1|1	.|.	0|1	.|.	.|.	.|.	0,1	0,0	0,0	0,0	1,0	0,0	0,0	0,0	0,0	1,2	1,3	1,1	0,1	0,0	1,0	0,0	0,0	0,0	exonic	frameshift deletion	Os03g0747100:Os03t0747100-00:exon1:c.159_162del:p.R53fs,
Os03g0747100	30723968	30723968	C	T	SNP	.	25.7139	0|0	0|0	.|.	.|.	0|0	.|.	0|1	0|0	.|.	.|.	.|.	0|0	0|0	.|.	.|.	.|.	.|.	0|0	7,0	5,0	0,0	0,0	4,0	0,0	0,2	2,0	0,0	0,0	0,0	3,0	1,0	0,0	0,0	0,0	0,0	1,0	exonic	nonsynonymous SNV	Os03g0747100:Os03t0747100-00:exon1:c.C617T:p.A206V,
Os03g0747200	30727349	30727349	G	T	SNP	.	79	0|0	0|0	0|0	0|0	0|0	0|0	0|0	0|0	0|1	0|0	0|0	0|0	0|0	0|0	0|0	0|0	0|0	0|0	25,0	13,0	30,0	27,0	18,0	19,0	52,0	14,0	31,5	29,0	31,0	32,0	68,0	70,0	72,0	99,0	79,0	81,0	exonic	synonymous SNV	Os03g0747200:Os03t0747200-01:exon5:c.C1176A:p.P392P,
Os03g0747200	30727719	30727719	A	G	SNP	.	40.0973	0|0	.|.	0|0	0|0	0|0	0|1	0|0	.|.	.|.	0|0	.|.	0|0	0|0	0|0	0|0	0|0	0|0	0|0	10,0	0,0	5,0	4,0	6,0	2,3	1,0	0,0	0,0	3,0	0,0	4,0	8,0	8,0	10,0	14,0	14,0	10,0	intronic	-	-
Os03g0747200	30727866	30727866	G	A	SNP	.	34.3214	0|0	0|0	0|0	0|0	0|0	0|0	0|0	0|0	0|0	0|0	.|.	0|1	0|0	0|0	0|0	0|0	0|0	0|0	6,0	3,0	2,0	4,0	1,0	5,0	2,0	3,0	3,0	3,0	0,0	4,3	9,0	19,0	12,0	14,0	15,0	10,0	intronic	-	-
Os03g0747200	30727872	30727872	A	G	SNP	.	37.5651	0|0	0|0	0|0	0|0	0|0	0|0	0|0	0|0	0|0	0|0	.|.	0|0	0|0	0|0	0|0	0|1	0|0	0|0	6,0	3,0	2,0	4,0	1,0	1,0	2,0	3,0	3,0	3,0	0,0	7,0	9,0	17,0	13,0	9,2	13,0	11,0	intronic	-	-
Os03g0747200	30729226	30729226	A	C	SNP	.	104	0|0	0|0	0|0	0|0	0|0	0|0	0|0	0|0	0|0	0|0	0|1	0|0	0|0	0|0	0|0	0|0	0|0	0|0	18,0	8,0	21,0	16,0	15,0	14,0	16,0	16,0	13,0	21,0	32,6	11,0	33,0	30,0	45,0	41,0	37,0	27,0	intronic	-	-
Os03g0747200(dist=1084),Os03g0747300(dist=3950)	30732518	30732518	A	G	SNP	.	164	0|0	0|0	0|0	0|0	0|0	0|0	0|1	0|0	0|0	0|0	0|0	0|0	0|0	0|0	0|0	0|0	0|0	0|0	14,0	9,0	4,0	16,0	13,0	3,0	9,6	8,0	13,0	10,0	9,0	4,0	26,0	21,0	29,0	23,0	37,0	29,0	intergenic	-	-
Os03g0747200(dist=1310),Os03g0747300(dist=3724)	30732744	30732744	A	T	SNP	.	24.6539	0|0	0|0	0|0	0|0	0|0	0|0	0|0	0|0	0|1	0|0	0|0	0|0	0|0	0|0	0|0	0|0	0|0	0|0	41,0	30,0	12,0	31,0	46,0	17,0	47,0	3,0	29,4	42,0	46,0	51,0	45,0	44,0	58,0	48,0	83,0	70,0	intergenic	-	-
Os03g0747200(dist=1976),Os03g0747300(dist=3042)	30733410	30733426	ggaggaggaggaggagg	-	Deletion	.	50	0|0	0|1	0|0	0|0	0|0	0|0	0|0	0|0	0|0	0|1	0|0	0|0	0|0	0|0	0|0	0|0	0|0	0|0	24,2	17,2	14,0	5,0	14,0	22,0	15,0	22,0	42,0	15,4	16,0	20,2	37,0	45,0	24,0	41,2	21,0	34,0	intergenic	-	-
Os03g0747200(dist=2021),Os03g0747300(dist=3002)	30733455	30733466	gagagagagaga	-	Deletion	.	34.7478	0|0	0|0	0|0	0|0	0|0	0|0	0|0	0|0	0|0	0|0	0|0	0|0	0|0	0|0	0|0	0|0	0|1	0|0	26,0	19,0	12,0	5,0	8,0	23,1	17,0	18,0	40,2	19,0	16,0	23,1	31,0	45,0	23,1	36,2	17,4	33,0	intergenic	-	-
Os03g0747200(dist=1084),Os03g0747300(dist=3950)	30732518	30732518	A	G	SNP	.	164	0|0	0|0	0|0	0|0	0|0	0|0	0|1	0|0	0|0	0|0	0|0	0|0	0|0	0|0	0|0	0|0	0|0	0|0	14,0	9,0	4,0	16,0	13,0	3,0	9,6	8,0	13,0	10,0	9,0	4,0	26,0	21,0	29,0	23,0	37,0	29,0	intergenic	-	-
Os03g0747200(dist=1310),Os03g0747300(dist=3724)	30732744	30732744	A	T	SNP	.	24.6539	0|0	0|0	0|0	0|0	0|0	0|0	0|0	0|0	0|1	0|0	0|0	0|0	0|0	0|0	0|0	0|0	0|0	0|0	41,0	30,0	12,0	31,0	46,0	17,0	47,0	3,0	29,4	42,0	46,0	51,0	45,0	44,0	58,0	48,0	83,0	70,0	intergenic	-	-
Os03g0747200(dist=1976),Os03g0747300(dist=3042)	30733410	30733426	ggaggaggaggaggagg	-	Deletion	.	50	0|0	0|1	0|0	0|0	0|0	0|0	0|0	0|0	0|0	0|1	0|0	0|0	0|0	0|0	0|0	0|0	0|0	0|0	24,2	17,2	14,0	5,0	14,0	22,0	15,0	22,0	42,0	15,4	16,0	20,2	37,0	45,0	24,0	41,2	21,0	34,0	intergenic	-	-
Os03g0747200(dist=2021),Os03g0747300(dist=3002)	30733455	30733466	gagagagagaga	-	Deletion	.	34.7478	0|0	0|0	0|0	0|0	0|0	0|0	0|0	0|0	0|0	0|0	0|0	0|0	0|0	0|0	0|0	0|0	0|1	0|0	26,0	19,0	12,0	5,0	8,0	23,1	17,0	18,0	40,2	19,0	16,0	23,1	31,0	45,0	23,1	36,2	17,4	33,0	intergenic	-	-
Os03g0747300	30736787	30736787	T	C	SNP	.	21.1263	0|0	0|0	0|0	0|0	0|0	0|0	0|0	0|0	0|1	0|0	0|0	0|0	0|0	0|0	0|0	0|0	0|0	0|0	1,0	1,0	8,0	4,0	9,0	7,0	2,0	5,0	14,2	3,0	9,0	2,0	10,0	36,0	11,0	19,0	13,0	14,0	intronic	-	-
Os03g0747300	30736933	30736933	T	C	SNP	.	78	0|0	0|0	0|0	0|0	0|0	.|.	0|1	0|0	0|0	0|0	0|0	0|0	0|0	0|0	0|0	0|0	0|0	0|0	8,0	1,0	7,0	7,0	7,0	0,0	6,6	11,0	4,0	8,0	8,0	12,0	11,0	18,0	15,0	23,0	15,0	15,0	intronic	-	-
Os03g0747300	30737255	30737255	C	A	SNP	.	73	0|0	0|1	0|0	0|0	0|0	0|0	0|0	0|0	0|0	0|0	0|0	0|0	0|0	0|0	0|0	0|0	0|0	0|0	2,0	1,5	2,0	8,0	6,0	22,0	3,0	9,0	26,0	15,0	21,0	20,0	38,0	38,0	44,0	34,0	63,0	55,0	intronic	-	-
Os03g0747300	30737422	30737422	G	C	SNP	.	101	0|0	.|.	0|0	0|0	0|0	0|0	0|0	.|.	0|0	0|1	0|0	0|0	0|0	0|0	0|0	0|0	0|0	0|0	3,0	0,0	5,0	3,0	2,0	3,0	7,0	0,0	5,0	3,8	17,0	10,0	19,0	20,0	23,0	26,0	27,0	22,0	intronic	-	-
Os03g0747300	30737792	30737792	C	T	SNP	.	52	0|0	.|.	0|0	0|0	0|0	0|0	0|0	0|0	0|0	0|0	0|0	0|1	0|0	0|0	0|0	0|0	0|0	0|0	19,0	0,0	11,0	10,0	3,0	13,0	22,0	10,0	4,0	42,0	23,0	15,3	67,0	48,0	55,1	51,0	50,0	60,0	exonic	nonsynonymous SNV	Os03g0747300:Os03t0747300-01:exon4:c.C326T:p.P109L,
Os03g0747300	30738017	30738017	C	T	SNP	.	200	0|0	1|1	0|0	0|0	0|0	.|.	.|.	0|0	0|0	0|0	0|0	0|0	0|0	0|0	0|0	0|0	0|0	0|0	18,0	0,8	5,0	1,0	4,0	0,0	0,0	4,0	16,0	10,0	9,0	2,0	34,0	23,0	27,0	43,0	22,0	35,0	intronic	-	-
Os03g0747300,Os03g0747400	30740273	30740273	T	C	SNP	.	44.5088	.|.	.|.	0|0	.|.	.|.	.|.	.|.	.|.	0|0	.|.	.|.	.|.	.|.	0|1	0|0	0|0	0|0	0|0	0,0	0,0	2,0	0,0	0,0	0,0	0,0	0,0	5,0	0,0	0,0	0,0	0,0	2,3	1,0	1,0	2,0	1,0	downstream	-	-
Os03g0747300,Os03g0747400	30740273	30740273	T	C	SNP	.	44.5088	.|.	.|.	0|0	.|.	.|.	.|.	.|.	.|.	0|0	.|.	.|.	.|.	.|.	0|1	0|0	0|0	0|0	0|0	0,0	0,0	2,0	0,0	0,0	0,0	0,0	0,0	5,0	0,0	0,0	0,0	0,0	2,3	1,0	1,0	2,0	1,0	downstream	-	-
Os03g0747600	30746672	30746672	C	T	SNP	.	20.1836	0|0	.|.	.|.	.|.	.|.	.|.	0|0	.|.	.|.	0|0	.|.	0|0	.|.	.|.	0|0	0|0	0|0	0|1	2,0	0,0	0,0	0,0	0,0	0,0	3,0	0,0	0,0	1,0	0,0	4,0	0,0	0,0	2,0	6,0	1,0	2,2	upstream	-	-
Os03g0747600(Os03t0747600-01:c.-223G>T)	30747596	30747596	G	T	SNP	.	24.1294	0|0	.|.	.|.	.|.	0|0	.|.	0|0	.|.	.|.	0|0	.|.	.|.	.|.	.|.	.|.	0|1	0|0	.|.	2,0	0,0	0,0	0,0	1,0	0,0	1,0	0,0	0,0	2,0	0,0	0,0	0,0	0,0	0,0	0,1	1,0	0,0	UTR5	-	-
Os03g0747600	30750071	30750071	C	T	SNP	.	37.4103	.|.	.|.	0|0	0|1	0|0	0|0	0|0	.|.	0|0	0|0	0|0	0|0	0|0	0|0	0|0	0|0	0|0	0|0	0,0	0,0	2,0	9,2	2,0	1,0	11,0	0,0	2,0	2,0	2,0	8,0	15,0	15,0	12,0	12,0	12,0	23,0	exonic	synonymous SNV	Os03g0747600:Os03t0747600-02:exon1:c.C1041T:p.H347H,
Os03g0747600	30751054	30751054	T	C	SNP	.	64	0|0	.|.	0|0	0|0	.|.	0|0	.|.	0|0	.|.	.|.	0|1	0|0	0|0	0|0	0|0	0|0	0|0	0|0	8,0	0,0	1,0	3,0	0,0	2,0	0,0	3,0	0,0	0,0	0,4	2,0	7,0	2,0	14,0	2,0	8,0	9,0	intronic	-	-
Os03g0747600	30752362	30752362	A	T	SNP	.	34.5974	0|0	.|.	0|0	.|.	0|0	0|1	.|.	.|.	0|0	.|.	.|.	0|0	0|0	0|0	0|0	0|0	0|0	0|0	5,0	0,0	1,0	0,0	10,0	1,3	0,0	0,0	5,0	0,0	0,0	3,0	5,0	5,0	9,0	11,0	12,0	12,0	intronic	-	-
Os03g0747600	30753805	30753805	C	T	SNP	.	27.2555	0|0	0|0	0|0	0|0	0|0	0|0	0|0	0|0	0|0	0|0	0|1	0|0	0|0	0|0	0|0	0|0	0|0	0|0	42,0	4,0	35,0	14,0	25,0	16,0	26,0	33,0	21,0	39,0	24,6	18,0	56,0	37,0	68,0	80,0	75,0	80,0	exonic	synonymous SNV	Os03g0747600:Os03t0747600-02:exon6:c.C1869T:p.F623F,
Os03g0747600	30754129	30754129	T	C	SNP	.	70	.|.	.|.	0|0	0|0	0|0	0|1	0|0	.|.	.|.	0|0	0|0	0|0	0|0	0|0	0|0	0|0	0|0	0|0	0,0	0,0	10,0	1,0	3,0	5,6	5,0	0,0	0,0	9,0	1,0	3,0	15,0	5,0	15,0	15,0	14,0	15,0	intronic	-	-
Os03g0747700	30756026	30756026	G	A	SNP	.	25.4783	0|0	.|.	0|0	0|0	0|0	0|0	0|0	0|1	0|0	0|0	0|0	0|0	0|0	0|0	0|0	0|0	0|0	0|0	2,0	0,0	13,0	1,0	1,0	1,0	11,0	7,3	17,0	15,0	11,0	9,0	48,0	18,0	22,0	20,0	23,1	23,0	exonic	synonymous SNV	Os03g0747700:Os03t0747700-01:exon3:c.C591T:p.V197V,
Os03g0747700	30756800	30756800	A	G	SNP	.	43.4471	0|0	0|0	0|1	0|0	0|0	0|0	0|0	0|0	0|0	0|0	0|0	0|0	0|0	0|0	0|0	0|0	0|0	0|0	11,0	1,0	7,2	2,0	3,0	5,0	8,0	11,0	18,0	15,0	16,0	14,0	38,0	19,0	13,0	23,0	28,0	23,0	exonic	nonsynonymous SNV	Os03g0747700:Os03t0747700-01:exon2:c.T460C:p.F154L,
Os03g0747700	30758405	30758405	C	T	SNP	.	60	0|0	0|0	0|0	0|0	0|0	0|0	0|0	0|0	.|.	0|0	0|0	0|1	0|0	0|0	0|0	0|0	0|0	0|0	3,0	2,0	4,0	7,0	1,0	7,0	19,0	1,0	0,0	3,0	16,0	8,5	8,0	4,0	6,0	6,0	2,0	7,0	upstream	-	-
Os03g0747800;Os03g0747850	30760107	30760107	C	T	SNP	.	27.9689	.|.	.|.	0|0	0|1	0|0	.|.	.|.	.|.	.|.	0|0	.|.	0|0	0|0	0|0	0|0	0|0	0|0	0|0	0,0	0,0	1,0	1,2	1,0	0,0	0,0	0,0	0,0	5,0	0,0	1,0	12,0	5,0	2,0	2,0	2,0	6,0	upstream;downstream	-	-
Os03g0747800;Os03g0747850	30760107	30760107	C	T	SNP	.	27.9689	.|.	.|.	0|0	0|1	0|0	.|.	.|.	.|.	.|.	0|0	.|.	0|0	0|0	0|0	0|0	0|0	0|0	0|0	0,0	0,0	1,0	1,2	1,0	0,0	0,0	0,0	0,0	5,0	0,0	1,0	12,0	5,0	2,0	2,0	2,0	6,0	upstream;downstream	-	-
Os03g0747800(Os03t0747800-01:c.-552C>T)	30760121	30760121	C	T	SNP	.	156	.|.	.|.	0|0	0|0	0|0	.|.	.|.	.|.	.|.	1|1	0|0	0|0	0|0	0|0	0|0	0|0	0|0	0|0	0,0	0,0	3,0	7,0	1,0	0,0	0,0	0,0	0,0	0,5	5,0	3,0	13,0	7,0	6,0	5,0	7,0	8,0	UTR5	-	-
