# Supplementary material for: Whole-Transcriptome Analysis Reveals Autophagy Is Involved in Early Senescence of zj-es Mutant Rice
Source: Front Plant Sci. 2022 Jun 3;13:899054. doi: 10.3389/fpls.2022.899054 (PMC9204060; doi:10.3389/fpls.2022.899054)
Supplement: Supplementary file 5 [file Table_3.XLSX]

## Sheet: ZJ22a-vs-zj-esa
All enrichment GO terms of target of miRNAs between ZJ22a and zj-esa in the comparison.
GO ID (level1)	GO Term (level1)	GO ID (level2)	GO Term (level2)	number_of_ZJ22a-vs-Pir1a (All)	Genes_of_ZJ22a-vs-Pir1a
GO:0008150	Biological Process	GO:0065007	biological regulation	80	Os01t0152500-00(-),Os01t0210700-02(KAT2),Os01t0242500-01(-),Os01t0275600-01(OsAGO4a),Os01t0385400-01(OsSLAC7),Os01t0385400-02(OsSLAC7),Os01t0741900-01(IAA6),Os01t0827300-01(OsChI1),Os02t0105100-01(-),Os02t0122800-02(-),Os02t0139200-01(OsPRMT5),Os02t0164900-01(OsARF6a),Os02t0164900-02(OsARF6a),Os02t0178000-01(SnRK1),Os02t0315600-01(OsbHLH139),Os02t0315600-02(OsbHLH139),Os02t0315600-03(OsbHLH139),O…
GO:0008150	Biological Process	GO:0048511	rhythmic process	2	Os03t0131200-01(CATC),Os03t0131200-02(CATC)
GO:0008150	Biological Process	GO:0050789	regulation of biological process	67	Os01t0152500-00(-),Os01t0210700-02(KAT2),Os01t0275600-01(OsAGO4a),Os01t0741900-01(IAA6),Os02t0105100-01(-),Os02t0122800-02(-),Os02t0139200-01(OsPRMT5),Os02t0164900-01(OsARF6a),Os02t0164900-02(OsARF6a),Os02t0178000-01(SnRK1),Os02t0315600-01(OsbHLH139),Os02t0315600-02(OsbHLH139),Os02t0315600-03(OsbHLH139),Os02t0662700-01(OsHAM1),Os02t0663100-01(OsHAM2),Os02t0749800-01(-),Os02t0749800-02(-),Os03t013…
GO:0008150	Biological Process	GO:0050896	response to stimulus	53	Os01t0149350-00(-),Os01t0149500-01(PIT),Os01t0205900-01(prx2),Os01t0205900-02(prx2),Os01t0308300-00(-),Os01t0741900-01(IAA6),Os01t0929100-01(-),Os01t0948400-01(OsP5CR),Os02t0139200-01(OsPRMT5),Os02t0164900-01(OsARF6a),Os02t0164900-02(OsARF6a),Os02t0178000-01(SnRK1),Os02t0475300-01(-),Os03t0131200-01(CATC),Os03t0131200-02(CATC),Os03t0265500-01(OsCOI2),Os03t0265500-02(OsCOI2),Os03t0381200-01(-),Os0…
GO:0008150	Biological Process	GO:0008283	cell proliferation	2	Os03t0607600-00(CycA3),Os04t0563700-01(cycB2)
GO:0008150	Biological Process	GO:0098754	detoxification	5	Os01t0205900-01(prx2),Os01t0205900-02(prx2),Os03t0131200-01(CATC),Os03t0131200-02(CATC),Os06t0547400-01(prx86)
GO:0008150	Biological Process	GO:0008152	metabolic process	181	Os01t0126100-01(OsLPR1),Os01t0127300-01(OsABCI4),Os01t0152500-00(-),Os01t0205900-01(prx2),Os01t0205900-02(prx2),Os01t0239700-01(-),Os01t0239700-02(-),Os01t0239700-03(-),Os01t0242500-01(-),Os01t0275600-01(OsAGO4a),Os01t0291500-01(OsAT4),Os01t0291500-02(OsAT4),Os01t0533000-00(OsGSL9),Os01t0719100-02(OsRZFP34),Os01t0719100-04(OsRZFP34),Os01t0741900-01(IAA6),Os01t0782500-01(-),Os01t0827300-01(OsChI1)…
GO:0008150	Biological Process	GO:0022414	reproductive process	10	Os01t0127300-01(OsABCI4),Os02t0139200-01(OsPRMT5),Os03t0106800-01(OsEXPB10),Os03t0556600-01(-),Os04t0631800-00(OsRLCK162),Os07t0435400-01(OsWD40-143),Os09t0530200-01(OsGH9B14),Os10t0575200-01(OsDjC74),Os11t0176200-01(OsDSHCT),Os12t0514400-01(-)
GO:0008150	Biological Process	GO:0000003	reproduction	10	Os01t0127300-01(OsABCI4),Os02t0139200-01(OsPRMT5),Os03t0106800-01(OsEXPB10),Os03t0556600-01(-),Os04t0631800-00(OsRLCK162),Os07t0435400-01(OsWD40-143),Os09t0530200-01(OsGH9B14),Os10t0575200-01(OsDjC74),Os11t0176200-01(OsDSHCT),Os12t0514400-01(-)
GO:0008150	Biological Process	GO:0071840	cellular component organization or biogenesis	36	Os01t0127300-01(OsABCI4),Os02t0105100-01(-),Os02t0139200-01(OsPRMT5),Os02t0717300-01(-),Os02t0749800-01(-),Os03t0106800-01(OsEXPB10),Os03t0210400-01(-),Os03t0271100-01(OsSIG2B),Os03t0271100-02(OsSIG2B),Os03t0271100-03(OsSIG2B),Os03t0343300-01(-),Os03t0376600-01(-),Os03t0381200-01(-),Os03t0381200-02(-),Os03t0607600-00(CycA3),Os03t0816900-01(OsSCAR3),Os04t0563700-01(cycB2),Os04t0604900-01(OsXTH16),…
GO:0008150	Biological Process	GO:0051704	multi-organism process	7	Os03t0106800-01(OsEXPB10),Os03t0131200-01(CATC),Os03t0131200-02(CATC),Os03t0556600-01(-),Os04t0631800-00(OsRLCK162),Os07t0435400-01(OsWD40-143),Os10t0441900-01(-)
GO:0008150	Biological Process	GO:0051179	localization	38	Os01t0210700-01(KAT2),Os01t0210700-02(KAT2),Os01t0385400-01(OsSLAC7),Os01t0385400-02(OsSLAC7),Os01t0516900-00(OsABCG33),Os01t0567500-01(OsMST8),Os01t0567600-00(OsMST7),Os01t0601000-00(OsEnS-10),Os01t0759900-01(-),Os01t0827300-01(OsChI1),Os01t0925300-01(-),Os02t0105100-01(-),Os02t0530100-01(OsATX1),Os02t0670900-02(OsANT3),Os02t0717300-01(-),Os02t0831100-01(OsC3H19),Os03t0195300-01(OsSultr2),Os03t0…
GO:0008150	Biological Process	GO:0023052	signaling	16	Os01t0741900-01(IAA6),Os02t0164900-01(OsARF6a),Os02t0164900-02(OsARF6a),Os02t0178000-01(SnRK1),Os03t0773300-01(-),Os04t0671900-01(ARF8),Os04t0671900-02(ARF8),Os04t0671900-03(ARF8),Os05t0125300-00(OsRLCK177),Os06t0677800-01(OsARF17),Os09t0471500-01(OsWAK82),Os09t0471800-01(OsWAK85),Os10t0441900-01(-),Os11t0102200-00(-),Os12t0249900-01(OsRLCK366),Os12t0613700-01(OsARF6b)
GO:0008150	Biological Process	GO:0032501	multicellular organismal process	12	Os01t0127300-01(OsABCI4),Os02t0139200-01(OsPRMT5),Os03t0174300-01(-),Os03t0556600-01(-),Os04t0631800-00(OsRLCK162),Os06t0597400-01(PNH1),Os07t0435400-01(OsWD40-143),Os07t0628600-00(OsORC6),Os09t0530200-01(OsGH9B14),Os10t0575200-01(OsDjC74),Os11t0176200-01(OsDSHCT),Os12t0514400-01(-)
GO:0008150	Biological Process	GO:0048518	positive regulation of biological process	9	Os02t0105100-01(-),Os02t0139200-01(OsPRMT5),Os03t0607600-00(CycA3),Os04t0563700-01(cycB2),Os09t0241100-01(OsWD40-166),Os09t0443500-01(OsMED20_1),Os11t0176200-01(OsDSHCT),Os11t0216300-01(-),Os12t0626300-01(APC5)
GO:0008150	Biological Process	GO:0002376	immune system process	1	Os02t0475300-01(-)
GO:0008150	Biological Process	GO:0032502	developmental process	13	Os01t0127300-01(OsABCI4),Os02t0139200-01(OsPRMT5),Os02t0749800-01(-),Os03t0174300-01(-),Os03t0210400-01(-),Os03t0381200-01(-),Os03t0381200-02(-),Os06t0597400-01(PNH1),Os07t0628600-00(OsORC6),Os09t0530200-01(OsGH9B14),Os10t0575200-01(OsDjC74),Os11t0176200-01(OsDSHCT),Os12t0514400-01(-)
GO:0008150	Biological Process	GO:0009987	cellular process	169	Os01t0127300-01(OsABCI4),Os01t0152500-00(-),Os01t0205900-01(prx2),Os01t0205900-02(prx2),Os01t0210700-02(KAT2),Os01t0239700-01(-),Os01t0239700-02(-),Os01t0239700-03(-),Os01t0242500-01(-),Os01t0275600-01(OsAGO4a),Os01t0291500-01(OsAT4),Os01t0291500-02(OsAT4),Os01t0385400-01(OsSLAC7),Os01t0385400-02(OsSLAC7),Os01t0533000-00(OsGSL9),Os01t0719100-02(OsRZFP34),Os01t0719100-04(OsRZFP34),Os01t0741900-01(…
GO:0008150	Biological Process	GO:0048519	negative regulation of biological process	6	Os01t0275600-01(OsAGO4a),Os03t0381200-01(-),Os03t0381200-02(-),Os06t0597400-01(PNH1),Os09t0567700-01(OsWD40-174),Os11t0176200-01(OsDSHCT)
GO:0003674	Molecular Function	GO:0016209	antioxidant activity	5	Os01t0205900-01(prx2),Os01t0205900-02(prx2),Os03t0131200-01(CATC),Os03t0131200-02(CATC),Os06t0547400-01(prx86)
GO:0003674	Molecular Function	GO:0003824	catalytic activity	160	Os01t0105900-01(-),Os01t0126100-01(OsLPR1),Os01t0205900-01(prx2),Os01t0205900-02(prx2),Os01t0239700-01(-),Os01t0239700-02(-),Os01t0239700-03(-),Os01t0242500-01(-),Os01t0261600-00(-),Os01t0262000-00(-),Os01t0291500-01(OsAT4),Os01t0291500-02(OsAT4),Os01t0350000-01(-),Os01t0516900-00(OsABCG33),Os01t0533000-00(OsGSL9),Os01t0651200-01(OsSTA25),Os01t0719100-02(OsRZFP34),Os01t0719100-04(OsRZFP34),Os01t0…
GO:0003674	Molecular Function	GO:0005215	transporter activity	23	Os01t0210700-01(KAT2),Os01t0210700-02(KAT2),Os01t0385400-01(OsSLAC7),Os01t0385400-02(OsSLAC7),Os01t0516900-00(OsABCG33),Os01t0567500-01(OsMST8),Os01t0567600-00(OsMST7),Os01t0601000-00(OsEnS-10),Os01t0759900-01(-),Os02t0530100-01(OsATX1),Os02t0670900-02(OsANT3),Os02t0717300-01(-),Os03t0195300-01(OsSultr2),Os03t0208500-01(NRAMP2),Os03t0208500-02(NRAMP2),Os03t0571700-01(-),Os04t0528300-01(OsABCG9),O…
GO:0003674	Molecular Function	GO:0140104	molecular carrier activity	1	Os03t0616700-01(-)
GO:0003674	Molecular Function	GO:0045735	nutrient reservoir activity	1	Os03t0197300-01(-)
GO:0003674	Molecular Function	GO:0140110	transcription regulator activity	12	Os02t0662700-01(OsHAM1),Os02t0663100-01(OsHAM2),Os03t0263300-01(NSP2),Os03t0271100-01(OsSIG2B),Os03t0271100-02(OsSIG2B),Os03t0271100-03(OsSIG2B),Os04t0471700-00(OsWRKY35),Os04t0504500-01(OsPLT4),Os04t0555000-01(OsHAM3),Os09t0443500-01(OsMED20_1),Os09t0567700-01(OsWD40-174),Os10t0551200-01(-)
GO:0003674	Molecular Function	GO:0005488	binding	189	Os01t0126100-01(OsLPR1),Os01t0149350-00(-),Os01t0149500-01(PIT),Os01t0152500-00(-),Os01t0205900-01(prx2),Os01t0205900-02(prx2),Os01t0239700-01(-),Os01t0239700-02(-),Os01t0239700-03(-),Os01t0242500-01(-),Os01t0265800-01(RBP-P),Os01t0265800-02(RBP-P),Os01t0275600-01(OsAGO4a),Os01t0308300-00(-),Os01t0359600-00(-),Os01t0516900-00(OsABCG33),Os01t0673300-01(Os_F0653),Os01t0719100-02(OsRZFP34),Os01t0719…
GO:0003674	Molecular Function	GO:0060089	molecular transducer activity	4	Os03t0773300-01(-),Os05t0125300-00(OsRLCK177),Os10t0441900-01(-),Os11t0102200-00(-)
GO:0003674	Molecular Function	GO:0098772	molecular function regulator	3	Os03t0607600-00(CycA3),Os04t0563700-01(cycB2),Os08t0547200-01(-)
GO:0005575	Cellular Component	GO:0005623	cell	176	Os01t0126100-01(OsLPR1),Os01t0127300-01(OsABCI4),Os01t0239700-01(-),Os01t0239700-02(-),Os01t0242500-01(-),Os01t0263500-01(OsMed3_1),Os01t0385400-01(OsSLAC7),Os01t0385400-02(OsSLAC7),Os01t0516900-00(OsABCG33),Os01t0533000-00(OsGSL9),Os01t0567500-01(OsMST8),Os01t0567600-00(OsMST7),Os01t0719100-02(OsRZFP34),Os01t0719100-04(OsRZFP34),Os01t0741900-01(IAA6),Os01t0782500-01(-),Os01t0827300-01(OsChI1),Os…
GO:0005575	Cellular Component	GO:0005576	extracellular region	13	Os01t0205900-01(prx2),Os01t0205900-02(prx2),Os01t0827300-01(OsChI1),Os01t0843800-00(OsLAC6),Os03t0106800-01(OsEXPB10),Os04t0604900-01(OsXTH16),Os06t0509600-00(-),Os06t0547400-01(prx86),Os06t0611400-01(OsPGL5),Os08t0517800-00(-),Os09t0530200-01(OsGH9B14),Os10t0146200-01(-),Os12t0554800-01(OsPGL33)
GO:0005575	Cellular Component	GO:0044464	cell part	173	Os01t0126100-01(OsLPR1),Os01t0127300-01(OsABCI4),Os01t0239700-01(-),Os01t0239700-02(-),Os01t0242500-01(-),Os01t0263500-01(OsMed3_1),Os01t0385400-01(OsSLAC7),Os01t0516900-00(OsABCG33),Os01t0533000-00(OsGSL9),Os01t0567500-01(OsMST8),Os01t0567600-00(OsMST7),Os01t0719100-02(OsRZFP34),Os01t0719100-04(OsRZFP34),Os01t0741900-01(IAA6),Os01t0782500-01(-),Os01t0827300-01(OsChI1),Os01t0830700-01(OsTBL12),Os…
GO:0005575	Cellular Component	GO:0031974	membrane-enclosed lumen	15	Os01t0263500-01(OsMed3_1),Os02t0122800-02(-),Os03t0343300-01(-),Os03t0728800-01(OsRH16),Os05t0151000-00(-),Os07t0170100-01(-),Os07t0170100-02(-),Os07t0406800-01(-),Os07t0435400-01(OsWD40-143),Os07t0628600-00(OsORC6),Os09t0241100-01(OsWD40-166),Os09t0443500-01(OsMED20_1),Os09t0567700-01(OsWD40-174),Os11t0176200-01(OsDSHCT),Os12t0561200-01(-)
GO:0005575	Cellular Component	GO:0099080	supramolecular complex	2	Os03t0381200-01(-),Os03t0381200-02(-)
GO:0005575	Cellular Component	GO:0043226	organelle	119	Os01t0126100-01(OsLPR1),Os01t0127300-01(OsABCI4),Os01t0263500-01(OsMed3_1),Os01t0719100-02(OsRZFP34),Os01t0719100-04(OsRZFP34),Os01t0741900-01(IAA6),Os01t0782500-01(-),Os01t0830700-01(OsTBL12),Os01t0830700-02(OsTBL12),Os01t0905400-01(-),Os01t0925300-01(-),Os01t0928800-01(OsLCB2a1),Os01t0929100-01(-),Os01t0970900-01(-),Os01t0970900-02(-),Os02t0105100-01(-),Os02t0117900-01(OsTBL38),Os02t0122800-01(…
GO:0005575	Cellular Component	GO:0016020	membrane	110	Os01t0126100-01(OsLPR1),Os01t0133100-02(-),Os01t0210700-01(KAT2),Os01t0210700-02(KAT2),Os01t0239150-00(-),Os01t0239700-01(-),Os01t0239700-02(-),Os01t0385400-01(OsSLAC7),Os01t0385400-02(OsSLAC7),Os01t0516900-00(OsABCG33),Os01t0533000-00(OsGSL9),Os01t0567500-01(OsMST8),Os01t0567600-00(OsMST7),Os01t0601000-00(OsEnS-10),Os01t0759900-01(-),Os01t0782500-01(-),Os01t0827300-01(OsChI1),Os01t0830700-01(OsT…
GO:0005575	Cellular Component	GO:0055044	symplast	3	Os05t0317900-01(OsCrRLK1L2),Os06t0104400-01(-),Os07t0406800-01(-)
GO:0005575	Cellular Component	GO:0030054	cell junction	3	Os05t0317900-01(OsCrRLK1L2),Os06t0104400-01(-),Os07t0406800-01(-)
GO:0005575	Cellular Component	GO:0044425	membrane part	87	Os01t0126100-01(OsLPR1),Os01t0133100-02(-),Os01t0210700-01(KAT2),Os01t0210700-02(KAT2),Os01t0239150-00(-),Os01t0239700-01(-),Os01t0239700-02(-),Os01t0385400-01(OsSLAC7),Os01t0385400-02(OsSLAC7),Os01t0516900-00(OsABCG33),Os01t0533000-00(OsGSL9),Os01t0567500-01(OsMST8),Os01t0567600-00(OsMST7),Os01t0601000-00(OsEnS-10),Os01t0759900-01(-),Os01t0782500-01(-),Os01t0830700-01(OsTBL12),Os01t0830700-02(Os…
GO:0005575	Cellular Component	GO:0032991	protein-containing complex	35	Os01t0263500-01(OsMed3_1),Os01t0533000-00(OsGSL9),Os02t0122800-01(-),Os02t0122800-02(-),Os02t0133800-01(OsPAF1),Os02t0634900-01(PAB2),Os02t0717300-01(-),Os03t0210400-01(-),Os03t0265500-01(OsCOI2),Os03t0265500-02(OsCOI2),Os03t0343300-01(-),Os03t0376600-01(-),Os03t0381200-01(-),Os03t0381200-02(-),Os03t0607600-00(CycA3),Os03t0616700-01(-),Os03t0805200-01(OsRH37),Os04t0563700-01(cycB2),Os04t0623700-0…
GO:0005575	Cellular Component	GO:0044422	organelle part	37	Os01t0126100-01(OsLPR1),Os01t0127300-01(OsABCI4),Os01t0263500-01(OsMed3_1),Os01t0928800-01(OsLCB2a1),Os02t0105100-01(-),Os02t0122800-01(-),Os02t0122800-02(-),Os02t0670900-02(OsANT3),Os02t0717300-01(-),Os03t0210400-01(-),Os03t0343300-01(-),Os03t0376600-01(-),Os03t0381200-01(-),Os03t0381200-02(-),Os03t0616700-01(-),Os03t0728800-01(OsRH16),Os04t0563700-01(cycB2),Os05t0151000-00(-),Os05t0499500-01(-)…

## Sheet:  ZJ22b-vs-zj-esb
All enrichment GO terms of target of miRNAs between ZJ22b and zj-esb in the comparison.
GO ID (level1)	GO Term (level1)	GO ID (level2)	GO Term (level2)	number_of_ZJ22b-vs-Pir1b (All)	Genes_of_ZJ22b-vs-Pir1b
GO:0008150	Biological Process	GO:0008152	metabolic process	578	Os01t0106700-00(-),Os01t0111500-01(OsbHLH125),Os01t0117200-01(OsRLCK16),Os01t0122200-01(-),Os01t0126100-01(OsLPR1),Os01t0127300-01(OsABCI4),Os01t0155500-01(OsCrRLK1L4),Os01t0172900-00(PG),Os01t0174600-01(OsC3H1),Os01t0183400-01(OsNF-YC13),Os01t0204000-01(-),Os01t0204000-02(-),Os01t0205900-01(prx2),Os01t0205900-02(prx2),Os01t0211000-00(-),Os01t0212500-01(OsSPEAR2),Os01t0217500-01(OsDJ-1A),Os01t021…
GO:0008150	Biological Process	GO:0098754	detoxification	18	Os01t0205900-01(prx2),Os01t0205900-02(prx2),Os01t0327100-01(prx15),Os01t0327100-02(prx15),Os03t0131200-01(CATC),Os03t0131200-02(CATC),Os03t0368000-00(PRX42),Os03t0368300-01(prx43),Os03t0369000-01(PRX46),Os04t0628200-01(prx56),Os04t0688200-01(prx60),Os05t0135000-01(prx68),Os06t0306300-01(prx78),Os06t0547400-01(prx86),Os07t0638600-00(prx105),Os07t0639400-01(prx108),Os10t0109300-01(PRX125),Os10t0109…
GO:0008150	Biological Process	GO:0065007	biological regulation	227	Os01t0106700-00(-),Os01t0111500-01(OsbHLH125),Os01t0174600-01(OsC3H1),Os01t0183400-01(OsNF-YC13),Os01t0210700-02(KAT2),Os01t0212500-01(OsSPEAR2),Os01t0218100-01(OsbHLH037),Os01t0242500-01(-),Os01t0275600-01(OsAGO4a),Os01t0310800-01(OsWAK4),Os01t0321300-00(-),Os01t0367300-01(-),Os01t0385400-01(OsSLAC7),Os01t0385400-02(OsSLAC7),Os01t0566100-01(OsELF3.2),Os01t0566100-02(OsELF3.2),Os01t0665200-01(OsM…
GO:0008150	Biological Process	GO:0032502	developmental process	58	Os01t0122200-01(-),Os01t0127300-01(OsABCI4),Os01t0321300-00(-),Os01t0566100-01(OsELF3.2),Os01t0566100-02(OsELF3.2),Os01t0710200-01(PAO1),Os01t0812000-01(GAMYB),Os01t0812000-02(GAMYB),Os02t0139200-01(OsPRMT5),Os02t0557000-01(-),Os02t0690500-01(OsPP2C26),Os02t0749800-01(-),Os03t0174300-01(-),Os03t0210400-01(-),Os03t0218300-01(-),Os03t0320900-01(V2),Os03t0381200-01(-),Os03t0381200-02(-),Os03t0578900…
GO:0008150	Biological Process	GO:0050789	regulation of biological process	195	Os01t0106700-00(-),Os01t0111500-01(OsbHLH125),Os01t0174600-01(OsC3H1),Os01t0183400-01(OsNF-YC13),Os01t0210700-02(KAT2),Os01t0212500-01(OsSPEAR2),Os01t0218100-01(OsbHLH037),Os01t0275600-01(OsAGO4a),Os01t0310800-01(OsWAK4),Os01t0321300-00(-),Os01t0367300-01(-),Os01t0566100-01(OsELF3.2),Os01t0566100-02(OsELF3.2),Os01t0665200-01(OsMPK20-4),Os01t0667900-01(GRX6),Os01t0675800-01(ONAC014),Os01t0680400-0…
GO:0008150	Biological Process	GO:0048511	rhythmic process	4	Os03t0131200-01(CATC),Os03t0131200-02(CATC),Os05t0549100-02(OsSTN7),Os07t0571100-01(-)
GO:0008150	Biological Process	GO:0032501	multicellular organismal process	48	Os01t0122200-01(-),Os01t0127300-01(OsABCI4),Os01t0566100-01(OsELF3.2),Os01t0566100-02(OsELF3.2),Os01t0669100-01(OsLSK1),Os01t0669100-02(OsLSK1),Os01t0812000-01(GAMYB),Os01t0812000-02(GAMYB),Os02t0139200-01(OsPRMT5),Os02t0690500-01(OsPP2C26),Os03t0174300-01(-),Os03t0218300-01(-),Os03t0556600-01(-),Os03t0588800-01(-),Os03t0637800-01(OsCR4),Os03t0670200-01(-),Os03t0785800-01(OsPCF6),Os04t0103500-01(…
GO:0008150	Biological Process	GO:0019740	nitrogen utilization	1	Os02t0550800-01(OsAMT3)
GO:0008150	Biological Process	GO:0051704	multi-organism process	22	Os01t0669100-01(OsLSK1),Os01t0669100-02(OsLSK1),Os03t0131200-01(CATC),Os03t0131200-02(CATC),Os03t0556600-01(-),Os04t0103500-01(YK28),Os04t0531500-01(-),Os04t0618700-01(Os-FLS2),Os04t0631800-00(OsRLCK162),Os05t0160300-01(OsLTPd8),Os05t0501400-01(-),Os06t0328400-01(-),Os07t0130200-01(-),Os07t0435400-01(OsWD40-143),Os07t0597200-01(-),Os07t0597200-02(-),Os08t0124000-02(-),Os09t0516900-01(-),Os10t0441…
GO:0008150	Biological Process	GO:0050896	response to stimulus	142	Os01t0106700-00(-),Os01t0149350-00(-),Os01t0149500-01(PIT),Os01t0204000-01(-),Os01t0205900-01(prx2),Os01t0205900-02(prx2),Os01t0308300-00(-),Os01t0310800-01(OsWAK4),Os01t0321300-00(-),Os01t0327100-01(prx15),Os01t0327100-02(prx15),Os01t0566100-01(OsELF3.2),Os01t0566100-02(OsELF3.2),Os01t0622300-01(HEME),Os01t0665200-01(OsMPK20-4),Os01t0684900-01(-),Os01t0741900-01(IAA6),Os01t0786900-01(OsATG18e),O…
GO:0008150	Biological Process	GO:0040007	growth	7	Os02t0690500-01(OsPP2C26),Os03t0320900-01(V2),Os07t0597200-01(-),Os07t0597200-02(-),Os08t0108100-01(-),Os09t0545700-01(OsSAUR41),Os11t0490600-01(LA1)
GO:0008150	Biological Process	GO:0022414	reproductive process	28	Os01t0127300-01(OsABCI4),Os01t0566100-01(OsELF3.2),Os01t0566100-02(OsELF3.2),Os01t0669100-01(OsLSK1),Os01t0669100-02(OsLSK1),Os01t0812000-01(GAMYB),Os01t0812000-02(GAMYB),Os02t0139200-01(OsPRMT5),Os02t0770700-01(-),Os03t0218300-01(-),Os03t0556600-01(-),Os03t0588800-01(-),Os03t0637800-01(OsCR4),Os03t0670200-01(-),Os04t0103500-01(YK28),Os04t0580700-01(MADS17),Os04t0631800-00(OsRLCK162),Os05t0501400…
GO:0008150	Biological Process	GO:0048518	positive regulation of biological process	33	Os01t0111500-01(OsbHLH125),Os01t0174600-01(OsC3H1),Os01t0680400-01(-),Os01t0756200-01(OsbZIP06),Os02t0105100-01(-),Os02t0139200-01(OsPRMT5),Os02t0649300-01(HOX24),Os03t0172000-01(MOS3/SAR3),Os03t0205300-00(OsbHLH129),Os03t0607600-00(CycA3),Os03t0747600-02(-),Os03t0800800-01(-),Os04t0459800-01(-),Os04t0493100-01(OsbHLH065),Os04t0541700-02(HOX22),Os04t0568700-00(HSFB2A),Os04t0580700-01(MADS17),Os06…
GO:0008150	Biological Process	GO:0000003	reproduction	28	Os01t0127300-01(OsABCI4),Os01t0566100-01(OsELF3.2),Os01t0566100-02(OsELF3.2),Os01t0669100-01(OsLSK1),Os01t0669100-02(OsLSK1),Os01t0812000-01(GAMYB),Os01t0812000-02(GAMYB),Os02t0139200-01(OsPRMT5),Os02t0770700-01(-),Os03t0218300-01(-),Os03t0556600-01(-),Os03t0588800-01(-),Os03t0637800-01(OsCR4),Os03t0670200-01(-),Os04t0103500-01(YK28),Os04t0580700-01(MADS17),Os04t0631800-00(OsRLCK162),Os05t0501400…
GO:0008150	Biological Process	GO:0002376	immune system process	5	Os02t0475300-01(-),Os03t0172000-01(MOS3/SAR3),Os05t0160300-01(OsLTPd8),Os10t0467600-01(p28),Os11t0141900-00(-)
GO:0008150	Biological Process	GO:0008283	cell proliferation	2	Os03t0607600-00(CycA3),Os06t0665400-01(APO1)
GO:0008150	Biological Process	GO:0071840	cellular component organization or biogenesis	94	Os01t0106700-00(-),Os01t0127300-01(OsABCI4),Os01t0159200-01(OsFLA8),Os01t0321300-00(-),Os01t0584200-00(-),Os01t0680400-01(-),Os01t0686600-01(-),Os01t0897800-01(OsRad21),Os01t0897800-02(OsRad21),Os01t0897800-03(OsRad21),Os01t0897800-04(OsRad21),Os01t0911000-01(-),Os02t0105100-01(-),Os02t0139200-01(OsPRMT5),Os02t0543300-00(-),Os02t0556000-00(-),Os02t0557000-01(-),Os02t0612800-01(BIP135),Os02t069050…
GO:0008150	Biological Process	GO:0009987	cellular process	519	Os01t0106700-00(-),Os01t0111500-01(OsbHLH125),Os01t0117200-01(OsRLCK16),Os01t0122200-01(-),Os01t0127300-01(OsABCI4),Os01t0155500-01(OsCrRLK1L4),Os01t0159200-01(OsFLA8),Os01t0174600-01(OsC3H1),Os01t0183400-01(OsNF-YC13),Os01t0204000-01(-),Os01t0204000-02(-),Os01t0205900-01(prx2),Os01t0205900-02(prx2),Os01t0210700-02(KAT2),Os01t0212500-01(OsSPEAR2),Os01t0217500-01(OsDJ-1A),Os01t0218100-01(OsbHLH037…
GO:0008150	Biological Process	GO:0023052	signaling	40	Os01t0106700-00(-),Os01t0310800-01(OsWAK4),Os01t0665200-01(OsMPK20-4),Os01t0741900-01(IAA6),Os02t0811200-00(OsWAK24),Os02t0821400-01(OsRLCK90),Os02t0821400-02(OsRLCK90),Os03t0172000-01(MOS3/SAR3),Os03t0227900-00(-),Os03t0309200-01(PHYB),Os03t0309200-02(PHYB),Os03t0719800-01(PHYA),Os03t0752100-01(PHYC),Os03t0773300-01(-),Os03t0810600-01(-),Os04t0117300-02(-),Os04t0213800-00(OsRLCK137),Os04t0459800…
GO:0008150	Biological Process	GO:0051179	localization	101	Os01t0210700-01(KAT2),Os01t0210700-02(KAT2),Os01t0222500-01(-),Os01t0321300-00(-),Os01t0385400-01(OsSLAC7),Os01t0385400-02(OsSLAC7),Os01t0516900-00(OsABCG33),Os01t0567500-01(OsMST8),Os01t0567600-00(OsMST7),Os01t0584200-00(-),Os01t0684900-01(-),Os01t0759900-01(-),Os01t0827300-01(OsChI1),Os01t0842500-01(OsLAC5),Os01t0850550-00(OsLAC7),Os01t0850700-02(OsLAC8),Os01t0850800-00(OsLAC9),Os01t0925300-01(…
GO:0008150	Biological Process	GO:0048519	negative regulation of biological process	19	Os01t0106700-00(-),Os01t0174600-01(OsC3H1),Os01t0275600-01(OsAGO4a),Os02t0510300-01(-),Os03t0381200-01(-),Os03t0381200-02(-),Os03t0683300-01(-),Os03t0747600-02(-),Os04t0415100-01(OsOFP10),Os04t0577700-01(OsOFP11),Os06t0154200-01(D3),Os06t0597400-01(PNH1),Os08t0107900-02(OsMAGO1),Os08t0305300-01(-),Os10t0467600-01(p28),Os11t0176200-01(OsDSHCT),Os11t0232000-00(OsSRP-GMS),Os12t0147200-01(-),Os12t015…
GO:0003674	Molecular Function	GO:0016209	antioxidant activity	18	Os01t0205900-01(prx2),Os01t0205900-02(prx2),Os01t0327100-01(prx15),Os01t0327100-02(prx15),Os03t0131200-01(CATC),Os03t0131200-02(CATC),Os03t0368000-00(PRX42),Os03t0368300-01(prx43),Os03t0369000-01(PRX46),Os04t0628200-01(prx56),Os04t0688200-01(prx60),Os05t0135000-01(prx68),Os06t0306300-01(prx78),Os06t0547400-01(prx86),Os07t0638600-00(prx105),Os07t0639400-01(prx108),Os10t0109300-01(PRX125),Os10t0109…
GO:0003674	Molecular Function	GO:0060089	molecular transducer activity	22	Os01t0310800-01(OsWAK4),Os02t0554100-01(-),Os02t0821400-01(OsRLCK90),Os02t0821400-02(OsRLCK90),Os03t0227900-00(-),Os03t0309200-01(PHYB),Os03t0309200-02(PHYB),Os03t0719800-01(PHYA),Os03t0752100-01(PHYC),Os03t0773300-01(-),Os04t0213800-00(OsRLCK137),Os04t0488000-01(CDKG),Os04t0488000-02(CDKG),Os04t0531500-01(-),Os05t0125300-00(OsRLCK177),Os06t0328400-01(-),Os07t0103100-01(OsGLR3.6),Os07t0130200-01(…
GO:0003674	Molecular Function	GO:0140110	transcription regulator activity	49	Os01t0111500-01(OsbHLH125),Os01t0183400-01(OsNF-YC13),Os01t0212500-01(OsSPEAR2),Os01t0680400-01(-),Os01t0756200-01(OsbZIP06),Os01t0812000-01(GAMYB),Os01t0812000-02(GAMYB),Os02t0649300-01(HOX24),Os02t0656600-00(OsERF#032),Os02t0662700-01(OsHAM1),Os02t0663100-01(OsHAM2),Os03t0205300-00(OsbHLH129),Os03t0232200-01(OsPLT9),Os03t0263300-01(NSP2),Os03t0271100-01(OsSIG2B),Os03t0271100-02(OsSIG2B),Os03t02…
GO:0003674	Molecular Function	GO:0003824	catalytic activity	484	Os01t0105900-01(-),Os01t0106700-00(-),Os01t0117200-01(OsRLCK16),Os01t0126100-01(OsLPR1),Os01t0155500-01(OsCrRLK1L4),Os01t0172900-00(PG),Os01t0179600-01(OsUGT75K1),Os01t0199400-01(-),Os01t0204000-01(-),Os01t0204000-02(-),Os01t0205900-01(prx2),Os01t0205900-02(prx2),Os01t0211000-00(-),Os01t0217000-01(OsTBL19),Os01t0217500-01(OsDJ-1A),Os01t0222500-01(-),Os01t0239700-01(-),Os01t0239700-02(-),Os01t0239…
GO:0003674	Molecular Function	GO:0045735	nutrient reservoir activity	5	Os03t0197300-01(-),Os03t0336100-01(CDP3.2),Os03t0693900-00(OsOxO3),Os03t0694000-01(Osoxo4),Os08t0127900-01(OsEnS-115)
GO:0003674	Molecular Function	GO:0140104	molecular carrier activity	3	Os03t0616700-01(-),Os05t0517600-00(OsHB5),Os11t0695900-01(-)
GO:0003674	Molecular Function	GO:0090729	toxin activity	1	Os03t0683300-01(-)
GO:0003674	Molecular Function	GO:0031386	protein tag	1	Os01t0328400-01(RPS27a)
GO:0003674	Molecular Function	GO:0005488	binding	576	Os01t0106700-00(-),Os01t0111500-01(OsbHLH125),Os01t0117200-01(OsRLCK16),Os01t0122200-01(-),Os01t0126100-01(OsLPR1),Os01t0149350-00(-),Os01t0149500-01(PIT),Os01t0155500-01(OsCrRLK1L4),Os01t0165200-02(-),Os01t0174600-01(OsC3H1),Os01t0183400-01(OsNF-YC13),Os01t0189100-01(-),Os01t0205900-01(prx2),Os01t0205900-02(prx2),Os01t0211000-00(-),Os01t0218100-01(OsbHLH037),Os01t0222700-01(-),Os01t0222700-02(-)…
GO:0003674	Molecular Function	GO:0098772	molecular function regulator	18	Os02t0198300-01(-),Os02t0198300-02(-),Os02t0608550-00(-),Os03t0607600-00(CycA3),Os03t0742800-01(-),Os03t0742800-02(-),Os04t0117300-02(-),Os06t0301300-00(-),Os06t0338900-01(-),Os06t0699900-01(OsRpn1b),Os07t0691100-01(OsPME23),Os08t0108100-01(-),Os08t0547200-01(-),Os09t0364000-01(OsC3H59),Os11t0232000-00(OsSRP-GMS),Os12t0156400-01(-),Os12t0283400-01(-),Os12t0561500-00(-)
GO:0003674	Molecular Function	GO:0005215	transporter activity	49	Os01t0210700-01(KAT2),Os01t0210700-02(KAT2),Os01t0222500-01(-),Os01t0321300-00(-),Os01t0385400-01(OsSLAC7),Os01t0385400-02(OsSLAC7),Os01t0516900-00(OsABCG33),Os01t0567500-01(OsMST8),Os01t0567600-00(OsMST7),Os01t0684900-01(-),Os01t0759900-01(-),Os02t0102200-01(OsAAP7C),Os02t0530100-01(OsATX1),Os02t0550800-01(OsAMT3),Os02t0574100-01(-),Os02t0670900-02(OsANT3),Os02t0693700-02(OsABCB11),Os02t0717300-…
GO:0003674	Molecular Function	GO:0005198	structural molecule activity	8	Os01t0328400-01(RPS27a),Os03t0172000-01(MOS3/SAR3),Os06t0300600-01(-),Os07t0461500-00(OsSTA194),Os11t0104866-00(-),Os11t0550800-01(-),Os12t0104766-00(-),transcript-rpl5(-)
GO:0005575	Cellular Component	GO:0005576	extracellular region	51	Os01t0205900-01(prx2),Os01t0205900-02(prx2),Os01t0327100-01(prx15),Os01t0634500-00(OsLAC2),Os01t0827300-01(OsChI1),Os01t0842500-01(OsLAC5),Os01t0843800-00(OsLAC6),Os01t0850550-00(OsLAC7),Os01t0850700-02(OsLAC8),Os01t0850800-00(OsLAC9),Os02t0733300-01(OsGH9B1),Os03t0368000-00(PRX42),Os03t0368300-01(prx43),Os03t0369000-01(PRX46),Os03t0693900-00(OsOxO3),Os03t0694000-01(Osoxo4),Os04t0206300-00(-),Os0…
GO:0005575	Cellular Component	GO:0005623	cell	539	Os01t0106700-00(-),Os01t0111500-01(OsbHLH125),Os01t0122200-01(-),Os01t0126100-01(OsLPR1),Os01t0127300-01(OsABCI4),Os01t0155500-01(OsCrRLK1L4),Os01t0159200-01(OsFLA8),Os01t0174600-01(OsC3H1),Os01t0179600-01(OsUGT75K1),Os01t0183400-01(OsNF-YC13),Os01t0199400-01(-),Os01t0204000-01(-),Os01t0204000-02(-),Os01t0217000-01(OsTBL19),Os01t0217500-01(OsDJ-1A),Os01t0218100-01(OsbHLH037),Os01t0234100-01(-),Os…
GO:0005575	Cellular Component	GO:0044464	cell part	533	Os01t0106700-00(-),Os01t0111500-01(OsbHLH125),Os01t0122200-01(-),Os01t0126100-01(OsLPR1),Os01t0127300-01(OsABCI4),Os01t0155500-01(OsCrRLK1L4),Os01t0159200-01(OsFLA8),Os01t0174600-01(OsC3H1),Os01t0179600-01(OsUGT75K1),Os01t0183400-01(OsNF-YC13),Os01t0199400-01(-),Os01t0204000-01(-),Os01t0204000-02(-),Os01t0217000-01(OsTBL19),Os01t0217500-01(OsDJ-1A),Os01t0218100-01(OsbHLH037),Os01t0234100-01(-),Os…
GO:0005575	Cellular Component	GO:0055044	symplast	21	Os01t0155500-01(OsCrRLK1L4),Os01t0327100-01(prx15),Os02t0100600-01(-),Os03t0336100-01(CDP3.2),Os03t0368000-00(PRX42),Os03t0368300-01(prx43),Os03t0369000-01(PRX46),Os03t0718100-01(ACT1),Os04t0416700-01(-),Os04t0628200-01(prx56),Os04t0688200-01(prx60),Os05t0135000-01(prx68),Os05t0317900-01(OsCrRLK1L2),Os05t0485800-00(-),Os06t0104400-01(-),Os06t0306300-01(prx78),Os07t0638600-00(prx105),Os07t0639400-…
GO:0005575	Cellular Component	GO:0030054	cell junction	21	Os01t0155500-01(OsCrRLK1L4),Os01t0327100-01(prx15),Os02t0100600-01(-),Os03t0336100-01(CDP3.2),Os03t0368000-00(PRX42),Os03t0368300-01(prx43),Os03t0369000-01(PRX46),Os03t0718100-01(ACT1),Os04t0416700-01(-),Os04t0628200-01(prx56),Os04t0688200-01(prx60),Os05t0135000-01(prx68),Os05t0317900-01(OsCrRLK1L2),Os05t0485800-00(-),Os06t0104400-01(-),Os06t0306300-01(prx78),Os07t0638600-00(prx105),Os07t0639400-…
GO:0005575	Cellular Component	GO:0009295	nucleoid	4	Os04t0459800-01(-),Os05t0393400-01(-),Os05t0393400-02(-),Os05t0393400-03(-)
GO:0005575	Cellular Component	GO:0043226	organelle	367	Os01t0106700-00(-),Os01t0111500-01(OsbHLH125),Os01t0122200-01(-),Os01t0126100-01(OsLPR1),Os01t0127300-01(OsABCI4),Os01t0179600-01(OsUGT75K1),Os01t0183400-01(OsNF-YC13),Os01t0199400-01(-),Os01t0204000-01(-),Os01t0204000-02(-),Os01t0217000-01(OsTBL19),Os01t0217500-01(OsDJ-1A),Os01t0218100-01(OsbHLH037),Os01t0234100-01(-),Os01t0269000-01(-),Os01t0276100-01(OsIDHa),Os01t0321300-00(-),Os01t0328400-01(…
GO:0005575	Cellular Component	GO:0044421	extracellular region part	4	Os04t0206300-00(-),Os07t0590500-00(-),Os09t0564200-01(-),Os11t0232000-00(OsSRP-GMS)
GO:0005575	Cellular Component	GO:0031974	membrane-enclosed lumen	33	Os01t0183400-01(OsNF-YC13),Os01t0204000-01(-),Os01t0204000-02(-),Os01t0680400-01(-),Os01t0897800-01(OsRad21),Os01t0897800-03(OsRad21),Os01t0897800-04(OsRad21),Os01t0911000-01(-),Os03t0343300-01(-),Os03t0728800-01(OsRH16),Os03t0735100-01(OsWD40-87),Os03t0800800-01(-),Os04t0177600-01(-),Os04t0177600-02(-),Os04t0459800-01(-),Os05t0151000-00(-),Os05t0312000-01(OsMed5_1),Os06t0300600-01(-),Os07t017010…
GO:0005575	Cellular Component	GO:0099080	supramolecular complex	3	Os03t0381200-01(-),Os03t0381200-02(-),Os12t0624800-01(-)
GO:0005575	Cellular Component	GO:0016020	membrane	303	Os01t0126100-01(OsLPR1),Os01t0133100-02(-),Os01t0155500-01(OsCrRLK1L4),Os01t0159200-01(OsFLA8),Os01t0199400-01(-),Os01t0199400-02(-),Os01t0203400-01(OsCEP7),Os01t0210700-01(KAT2),Os01t0210700-02(KAT2),Os01t0222500-01(-),Os01t0239150-00(-),Os01t0239700-01(-),Os01t0239700-02(-),Os01t0310800-01(OsWAK4),Os01t0311100-00(OsRFPH2-4),Os01t0321300-00(-),Os01t0337160-00(-),Os01t0385400-01(OsSLAC7),Os01t038…
GO:0005575	Cellular Component	GO:0044425	membrane part	242	Os01t0126100-01(OsLPR1),Os01t0133100-02(-),Os01t0155500-01(OsCrRLK1L4),Os01t0199400-01(-),Os01t0199400-02(-),Os01t0203400-01(OsCEP7),Os01t0210700-01(KAT2),Os01t0210700-02(KAT2),Os01t0222500-01(-),Os01t0239150-00(-),Os01t0239700-01(-),Os01t0239700-02(-),Os01t0311100-00(OsRFPH2-4),Os01t0337160-00(-),Os01t0385400-01(OsSLAC7),Os01t0385400-02(OsSLAC7),Os01t0516900-00(OsABCG33),Os01t0533000-00(OsGSL9),…
GO:0005575	Cellular Component	GO:0032991	protein-containing complex	91	Os01t0183400-01(OsNF-YC13),Os01t0204000-01(-),Os01t0204000-02(-),Os01t0222500-01(-),Os01t0328400-01(RPS27a),Os01t0367300-01(-),Os01t0533000-00(OsGSL9),Os01t0680400-01(-),Os01t0686600-01(-),Os01t0897800-01(OsRad21),Os01t0897800-02(OsRad21),Os01t0897800-03(OsRad21),Os01t0897800-04(OsRad21),Os01t0907300-01(-),Os01t0907300-02(-),Os01t0911000-01(-),Os01t0965600-01(-),Os02t0133800-01(OsPAF1),Os02t05433…
GO:0005575	Cellular Component	GO:0044422	organelle part	113	Os01t0126100-01(OsLPR1),Os01t0127300-01(OsABCI4),Os01t0183400-01(OsNF-YC13),Os01t0204000-01(-),Os01t0204000-02(-),Os01t0321300-00(-),Os01t0495900-01(-),Os01t0622300-01(HEME),Os01t0680400-01(-),Os01t0686600-01(-),Os01t0862200-02(-),Os01t0897800-01(OsRad21),Os01t0897800-02(OsRad21),Os01t0897800-03(OsRad21),Os01t0897800-04(OsRad21),Os01t0907300-01(-),Os01t0907300-02(-),Os01t0911000-01(-),Os01t092880…

## Sheet: ZJ22c-vs-zj-esc
All enrichment GO terms of target of miRNAs between ZJ22c and zj-esc in the comparison.
GO ID (level1)	GO Term (level1)	GO ID (level2)	GO Term (level2)	number_of_ZJ22c-vs-Pir1c (All)	Genes_of_ZJ22c-vs-Pir1c
GO:0008150	Biological Process	GO:0065007	biological regulation	164	Os01t0152500-00(-),Os01t0197100-01(D2),Os01t0197450-00(-),Os01t0210700-02(KAT2),Os01t0212500-01(OsSPEAR2),Os01t0242500-01(-),Os01t0275600-01(OsAGO4a),Os01t0292200-01(OsCIPK01),Os01t0310800-01(OsWAK4),Os01t0367300-01(-),Os01t0393100-01(ONAC026),Os01t0665200-01(OsMPK20-4),Os01t0675800-01(ONAC014),Os01t0741900-01(IAA6),Os01t0756700-01(KAT1),Os01t0812000-01(GAMYB),Os01t0812000-02(GAMYB),Os01t0827300-…
GO:0008150	Biological Process	GO:0050789	regulation of biological process	133	Os01t0152500-00(-),Os01t0197450-00(-),Os01t0210700-02(KAT2),Os01t0212500-01(OsSPEAR2),Os01t0275600-01(OsAGO4a),Os01t0292200-01(OsCIPK01),Os01t0310800-01(OsWAK4),Os01t0367300-01(-),Os01t0393100-01(ONAC026),Os01t0665200-01(OsMPK20-4),Os01t0675800-01(ONAC014),Os01t0741900-01(IAA6),Os01t0756700-01(KAT1),Os01t0812000-01(GAMYB),Os01t0812000-02(GAMYB),Os02t0105100-01(-),Os02t0139200-01(OsPRMT5),Os02t016…
GO:0008150	Biological Process	GO:0008152	metabolic process	345	Os01t0117200-01(OsRLCK16),Os01t0125900-01(OsUBC34),Os01t0126100-01(OsLPR1),Os01t0127300-01(OsABCI4),Os01t0152500-00(-),Os01t0197100-01(D2),Os01t0197450-00(-),Os01t0212500-01(OsSPEAR2),Os01t0242500-01(-),Os01t0275600-01(OsAGO4a),Os01t0276100-01(OsIDHa),Os01t0292200-01(OsCIPK01),Os01t0310800-01(OsWAK4),Os01t0328400-01(RPS27a),Os01t0367300-01(-),Os01t0393100-01(ONAC026),Os01t0533000-00(OsGSL9),Os01t…
GO:0008150	Biological Process	GO:0032502	developmental process	40	Os01t0127300-01(OsABCI4),Os01t0197100-01(D2),Os01t0761900-00(-),Os01t0812000-01(GAMYB),Os01t0812000-02(GAMYB),Os02t0139200-01(OsPRMT5),Os02t0557000-01(-),Os02t0625000-01(OSCRY2),Os02t0811000-01(G1L6),Os03t0174300-01(-),Os03t0210400-01(-),Os03t0218300-01(-),Os03t0320900-01(V2),Os03t0381200-01(-),Os03t0381200-02(-),Os03t0438100-01(AOC),Os03t0438100-02(AOC),Os03t0578900-00(OsGAMYBL2),Os03t0640100-01…
GO:0008150	Biological Process	GO:0048511	rhythmic process	4	Os02t0625000-01(OSCRY2),Os03t0438100-01(AOC),Os03t0438100-02(AOC),Os07t0571100-01(-)
GO:0008150	Biological Process	GO:0050896	response to stimulus	100	Os01t0144300-01(-),Os01t0149350-00(-),Os01t0149500-01(PIT),Os01t0197450-00(-),Os01t0292200-01(OsCIPK01),Os01t0308300-00(-),Os01t0310800-01(OsWAK4),Os01t0665200-01(OsMPK20-4),Os01t0741900-01(IAA6),Os01t0786900-01(OsATG18e),Os01t0948400-01(OsP5CR),Os02t0111900-01(-),Os02t0139200-01(OsPRMT5),Os02t0164900-01(OsARF6a),Os02t0164900-02(OsARF6a),Os02t0551100-01(SAPK6),Os02t0612800-01(BIP135),Os02t0621700…
GO:0008150	Biological Process	GO:0009987	cellular process	334	Os01t0117200-01(OsRLCK16),Os01t0125900-01(OsUBC34),Os01t0127300-01(OsABCI4),Os01t0152500-00(-),Os01t0197450-00(-),Os01t0210700-02(KAT2),Os01t0212500-01(OsSPEAR2),Os01t0242500-01(-),Os01t0275600-01(OsAGO4a),Os01t0276100-01(OsIDHa),Os01t0292200-01(OsCIPK01),Os01t0310800-01(OsWAK4),Os01t0328400-01(RPS27a),Os01t0367300-01(-),Os01t0393100-01(ONAC026),Os01t0533000-00(OsGSL9),Os01t0568800-00(OsRLCK37),O…
GO:0008150	Biological Process	GO:0008283	cell proliferation	4	Os03t0607600-00(CycA3),Os03t0640100-01(OsWD40-79),Os04t0486800-01(OsDBH),Os04t0563700-01(cycB2)
GO:0008150	Biological Process	GO:0032501	multicellular organismal process	32	Os01t0127300-01(OsABCI4),Os01t0197100-01(D2),Os01t0761900-00(-),Os01t0812000-01(GAMYB),Os01t0812000-02(GAMYB),Os02t0139200-01(OsPRMT5),Os02t0625000-01(OSCRY2),Os02t0811000-01(G1L6),Os03t0174300-01(-),Os03t0218300-01(-),Os03t0438100-01(AOC),Os03t0438100-02(AOC),Os03t0640100-01(OsWD40-79),Os03t0785800-01(OsPCF6),Os03t0851800-01(PANC),Os04t0206300-00(-),Os04t0571200-01(OsRFPH2-14),Os04t0631800-00(Os…
GO:0008150	Biological Process	GO:0023052	signaling	38	Os01t0197450-00(-),Os01t0292200-01(OsCIPK01),Os01t0310800-01(OsWAK4),Os01t0665200-01(OsMPK20-4),Os01t0741900-01(IAA6),Os02t0164900-01(OsARF6a),Os02t0164900-02(OsARF6a),Os02t0551100-01(SAPK6),Os02t0625000-01(OSCRY2),Os02t0811200-00(OsWAK24),Os03t0227900-00(-),Os03t0309200-01(PHYB),Os03t0309200-02(PHYB),Os03t0438100-01(AOC),Os03t0438100-02(AOC),Os03t0719800-01(PHYA),Os03t0749800-02(-),Os03t0752100-…
GO:0008150	Biological Process	GO:0048519	negative regulation of biological process	23	Os01t0275600-01(OsAGO4a),Os02t0510300-01(-),Os02t0672200-01(OsAGO1a),Os02t0831600-01(OsAGO1c),Os03t0381200-01(-),Os03t0381200-02(-),Os03t0749800-02(-),Os04t0566500-01(OsAGO1b),Os04t0566500-02(OsAGO1b),Os04t0571200-01(OsRFPH2-14),Os06t0154200-01(D3),Os06t0229066-00(-),Os06t0597400-01(PNH1),Os06t0729300-01(OsAGO1d),Os07t0138400-01(C3H47),Os08t0305300-01(-),Os08t0538700-01(Orysa),Os08t0538700-02(Ory…
GO:0008150	Biological Process	GO:0022414	reproductive process	21	Os01t0127300-01(OsABCI4),Os01t0812000-01(GAMYB),Os01t0812000-02(GAMYB),Os02t0139200-01(OsPRMT5),Os02t0625000-01(OSCRY2),Os02t0770700-01(-),Os03t0218300-01(-),Os03t0438100-01(AOC),Os03t0438100-02(AOC),Os03t0640100-01(OsWD40-79),Os03t0851800-01(PANC),Os04t0631800-00(OsRLCK162),Os04t0636400-01(-),Os06t0164900-00(-),Os06t0678200-01(OsSPS1),Os07t0435400-01(OsWD40-143),Os07t0550900-01(-),Os07t0609766-0…
GO:0008150	Biological Process	GO:0000003	reproduction	21	Os01t0127300-01(OsABCI4),Os01t0812000-01(GAMYB),Os01t0812000-02(GAMYB),Os02t0139200-01(OsPRMT5),Os02t0625000-01(OSCRY2),Os02t0770700-01(-),Os03t0218300-01(-),Os03t0438100-01(AOC),Os03t0438100-02(AOC),Os03t0640100-01(OsWD40-79),Os03t0851800-01(PANC),Os04t0631800-00(OsRLCK162),Os04t0636400-01(-),Os06t0164900-00(-),Os06t0678200-01(OsSPS1),Os07t0435400-01(OsWD40-143),Os07t0550900-01(-),Os07t0609766-0…
GO:0008150	Biological Process	GO:0048518	positive regulation of biological process	24	Os02t0105100-01(-),Os02t0139200-01(OsPRMT5),Os02t0325100-01(OsRpt3),Os02t0325100-02(OsRpt3),Os02t0579600-00(OsMADS27),Os02t0625000-01(OSCRY2),Os02t0731200-01(OsMADS57),Os03t0438100-01(AOC),Os03t0438100-02(AOC),Os03t0607600-00(CycA3),Os03t0640100-01(OsWD40-79),Os04t0486800-01(OsDBH),Os04t0563700-01(cycB2),Os04t0568700-00(HSFB2A),Os06t0101000-01(-),Os06t0154200-01(D3),Os06t0622300-01(OsARID3),Os07t…
GO:0008150	Biological Process	GO:0019740	nitrogen utilization	1	Os02t0550800-01(OsAMT3)
GO:0008150	Biological Process	GO:0040007	growth	6	Os02t0625000-01(OSCRY2),Os02t0731200-01(OsMADS57),Os03t0320900-01(V2),Os03t0438100-01(AOC),Os03t0438100-02(AOC),Os04t0571200-01(OsRFPH2-14)
GO:0008150	Biological Process	GO:0002376	immune system process	4	Os02t0625000-01(OSCRY2),Os03t0438100-01(AOC),Os03t0438100-02(AOC),Os10t0467600-01(p28)
GO:0008150	Biological Process	GO:0071840	cellular component organization or biogenesis	65	Os01t0127300-01(OsABCI4),Os02t0105100-01(-),Os02t0111900-01(-),Os02t0139200-01(OsPRMT5),Os02t0325100-01(OsRpt3),Os02t0329800-01(XAX1),Os02t0557000-01(-),Os02t0612800-01(BIP135),Os02t0625000-01(OSCRY2),Os02t0733300-01(OsGH9B1),Os02t0764400-01(OsSTA79),Os02t0770700-01(-),Os03t0152700-01(-),Os03t0210400-01(-),Os03t0266900-02(OsHsp17.3),Os03t0267000-00(OsHSP18.0-CI),Os03t0343300-01(-),Os03t0376600-01…
GO:0008150	Biological Process	GO:0051179	localization	65	Os01t0210700-01(KAT2),Os01t0210700-02(KAT2),Os01t0516900-00(OsABCG33),Os01t0567500-01(OsMST8),Os01t0567600-00(OsMST7),Os01t0601000-00(OsEnS-10),Os01t0756700-01(KAT1),Os01t0759900-01(-),Os01t0827300-01(OsChI1),Os01t0842400-01(Oslacc),Os01t0842500-01(OsLAC5),Os01t0850550-00(OsLAC7),Os01t0850800-00(OsLAC9),Os01t0868200-01(-),Os01t0868200-02(-),Os01t0925300-01(-),Os02t0103600-01(-),Os02t0105100-01(-)…
GO:0008150	Biological Process	GO:0051704	multi-organism process	10	Os02t0625000-01(OSCRY2),Os03t0438100-01(AOC),Os03t0438100-02(AOC),Os04t0631800-00(OsRLCK162),Os06t0164900-00(-),Os07t0435400-01(OsWD40-143),Os07t0550900-01(-),Os09t0516900-01(-),Os10t0441900-01(-),Os10t0467600-01(p28)
GO:0003674	Molecular Function	GO:0005488	binding	402	Os01t0117200-01(OsRLCK16),Os01t0126100-01(OsLPR1),Os01t0149350-00(-),Os01t0149500-01(PIT),Os01t0152500-00(-),Os01t0165200-02(-),Os01t0189100-01(-),Os01t0197100-01(D2),Os01t0197450-00(-),Os01t0222700-01(-),Os01t0222700-02(-),Os01t0234100-01(-),Os01t0234850-01(OsEnS-3),Os01t0242500-01(-),Os01t0265800-01(RBP-P),Os01t0265800-02(RBP-P),Os01t0275600-01(OsAGO4a),Os01t0276100-01(OsIDHa),Os01t0280400-00(-…
GO:0003674	Molecular Function	GO:0060089	molecular transducer activity	14	Os01t0310800-01(OsWAK4),Os02t0625000-01(OSCRY2),Os03t0227900-00(-),Os03t0309200-01(PHYB),Os03t0309200-02(PHYB),Os03t0719800-01(PHYA),Os03t0752100-01(PHYC),Os03t0773300-01(-),Os04t0488000-01(CDKG),Os04t0488000-02(CDKG),Os05t0125300-00(OsRLCK177),Os07t0103100-01(OsGLR3.6),Os10t0441900-01(-),Os11t0102200-00(-)
GO:0003674	Molecular Function	GO:0140104	molecular carrier activity	2	Os03t0616700-01(-),Os10t0477000-01(-)
GO:0003674	Molecular Function	GO:0045735	nutrient reservoir activity	3	Os03t0197300-01(-),Os08t0189100-01(GLP8-2),Os08t0189600-01(GLP8-7)
GO:0003674	Molecular Function	GO:0031386	protein tag	1	Os01t0328400-01(RPS27a)
GO:0003674	Molecular Function	GO:0140110	transcription regulator activity	24	Os01t0212500-01(OsSPEAR2),Os01t0812000-01(GAMYB),Os01t0812000-02(GAMYB),Os02t0579600-00(OsMADS27),Os02t0662700-01(OsHAM1),Os02t0663100-01(OsHAM2),Os02t0731200-01(OsMADS57),Os03t0232200-01(OsPLT9),Os03t0263300-01(NSP2),Os03t0578900-00(OsGAMYBL2),Os03t0785800-01(OsPCF6),Os04t0471700-00(OsWRKY35),Os04t0555000-01(OsHAM3),Os04t0568700-00(HSFB2A),Os05t0490600-00(OsMyb5),Os05t0501800-01(OsSPL),Os06t0622…
GO:0003674	Molecular Function	GO:0003824	catalytic activity	275	Os01t0105900-01(-),Os01t0117200-01(OsRLCK16),Os01t0125900-01(OsUBC34),Os01t0126100-01(OsLPR1),Os01t0196600-01(-),Os01t0197100-01(D2),Os01t0217000-01(OsTBL19),Os01t0242500-01(-),Os01t0276100-01(OsIDHa),Os01t0292200-01(OsCIPK01),Os01t0310800-01(OsWAK4),Os01t0350000-01(-),Os01t0367300-01(-),Os01t0516900-00(OsABCG33),Os01t0533000-00(OsGSL9),Os01t0568800-00(OsRLCK37),Os01t0621600-01(-),Os01t0634500-00…
GO:0003674	Molecular Function	GO:0098772	molecular function regulator	7	Os03t0607600-00(CycA3),Os03t0742800-01(-),Os03t0742800-02(-),Os04t0563700-01(cycB2),Os06t0338900-01(-),Os08t0547200-01(-),Os09t0364000-01(OsC3H59)
GO:0003674	Molecular Function	GO:0005215	transporter activity	28	Os01t0210700-01(KAT2),Os01t0210700-02(KAT2),Os01t0516900-00(OsABCG33),Os01t0567500-01(OsMST8),Os01t0567600-00(OsMST7),Os01t0601000-00(OsEnS-10),Os01t0756700-01(KAT1),Os01t0759900-01(-),Os02t0103600-01(-),Os02t0550800-01(OsAMT3),Os02t0670900-02(OsANT3),Os03t0208500-01(NRAMP2),Os03t0208500-02(NRAMP2),Os05t0113300-01(OsCHX12),Os06t0158900-00(OsABCC15),Os06t0565900-01(-),Os07t0100800-01(OsProT3),Os07…
GO:0003674	Molecular Function	GO:0005198	structural molecule activity	5	Os01t0328400-01(RPS27a),Os11t0104866-00(-),Os11t0550800-01(-),Os12t0104766-00(-),transcript-rpl5(-)
GO:0005575	Cellular Component	GO:0044464	cell part	354	Os01t0125900-01(OsUBC34),Os01t0126100-01(OsLPR1),Os01t0127300-01(OsABCI4),Os01t0196600-01(-),Os01t0197450-00(-),Os01t0217000-01(OsTBL19),Os01t0234100-01(-),Os01t0242500-01(-),Os01t0276100-01(OsIDHa),Os01t0280400-00(-),Os01t0292200-01(OsCIPK01),Os01t0310800-01(OsWAK4),Os01t0328400-01(RPS27a),Os01t0367300-01(-),Os01t0393100-01(ONAC026),Os01t0516900-00(OsABCG33),Os01t0527900-00(-),Os01t0533000-00(Os…
GO:0005575	Cellular Component	GO:0005623	cell	357	Os01t0125900-01(OsUBC34),Os01t0126100-01(OsLPR1),Os01t0127300-01(OsABCI4),Os01t0196600-01(-),Os01t0197450-00(-),Os01t0217000-01(OsTBL19),Os01t0234100-01(-),Os01t0242500-01(-),Os01t0276100-01(OsIDHa),Os01t0280400-00(-),Os01t0292200-01(OsCIPK01),Os01t0310800-01(OsWAK4),Os01t0328400-01(RPS27a),Os01t0367300-01(-),Os01t0393100-01(ONAC026),Os01t0516900-00(OsABCG33),Os01t0527900-00(-),Os01t0533000-00(Os…
GO:0005575	Cellular Component	GO:0043226	organelle	261	Os01t0126100-01(OsLPR1),Os01t0127300-01(OsABCI4),Os01t0196600-01(-),Os01t0197450-00(-),Os01t0217000-01(OsTBL19),Os01t0234100-01(-),Os01t0276100-01(OsIDHa),Os01t0280400-00(-),Os01t0292200-01(OsCIPK01),Os01t0328400-01(RPS27a),Os01t0367300-01(-),Os01t0393100-01(ONAC026),Os01t0527900-00(-),Os01t0622700-01(-),Os01t0622700-02(-),Os01t0675800-01(ONAC014),Os01t0687500-01(-),Os01t0691500-01(-),Os01t071590…
GO:0005575	Cellular Component	GO:0005576	extracellular region	22	Os01t0634500-00(OsLAC2),Os01t0827300-01(OsChI1),Os01t0842400-01(Oslacc),Os01t0842500-01(OsLAC5),Os01t0843800-00(OsLAC6),Os01t0850550-00(OsLAC7),Os01t0850800-00(OsLAC9),Os02t0733300-01(OsGH9B1),Os03t0273200-01(Lac),Os03t0273200-02(Lac),Os04t0206300-00(-),Os05t0458300-00(OsLAC13),Os05t0458500-00(OsLAC14),Os05t0458600-01(OsLAC),Os06t0237400-01(-),Os06t0545400-01(OsPGL1),Os06t0545800-01(OsPGL8),Os07t…
GO:0005575	Cellular Component	GO:0099080	supramolecular complex	4	Os01t0744000-01(-),Os03t0381200-01(-),Os03t0381200-02(-),Os12t0624800-01(-)
GO:0005575	Cellular Component	GO:0055044	symplast	7	Os02t0100600-01(-),Os05t0317900-01(OsCrRLK1L2),Os05t0485800-00(-),Os06t0104400-01(-),Os11t0104866-00(-),Os12t0104766-00(-),Os12t0158900-00(-)
GO:0005575	Cellular Component	GO:0030054	cell junction	7	Os02t0100600-01(-),Os05t0317900-01(OsCrRLK1L2),Os05t0485800-00(-),Os06t0104400-01(-),Os11t0104866-00(-),Os12t0104766-00(-),Os12t0158900-00(-)
GO:0005575	Cellular Component	GO:0044421	extracellular region part	3	Os04t0206300-00(-),Os07t0590500-00(-),Os09t0564200-01(-)
GO:0005575	Cellular Component	GO:0032991	protein-containing complex	72	Os01t0328400-01(RPS27a),Os01t0367300-01(-),Os01t0527900-00(-),Os01t0533000-00(OsGSL9),Os01t0744000-01(-),Os02t0133800-01(OsPAF1),Os02t0272600-01(-),Os02t0325100-01(OsRpt3),Os02t0621700-01(-),Os03t0135400-01(OsFbox128),Os03t0210400-01(-),Os03t0265500-01(OsCOI2),Os03t0265500-02(OsCOI2),Os03t0343300-01(-),Os03t0376600-01(-),Os03t0381200-01(-),Os03t0381200-02(-),Os03t0607600-00(CycA3),Os03t0616700-01…
GO:0005575	Cellular Component	GO:0031974	membrane-enclosed lumen	21	Os02t0625000-01(OSCRY2),Os03t0343300-01(-),Os03t0640100-01(OsWD40-79),Os03t0728800-01(OsRH16),Os03t0735100-01(OsWD40-87),Os05t0102800-01(-),Os05t0102800-02(-),Os05t0102800-03(-),Os05t0151000-00(-),Os07t0170100-01(-),Os07t0170100-02(-),Os07t0184900-01(OsKu70),Os07t0435400-01(OsWD40-143),Os07t0609766-00(-),Os07t0628600-00(OsORC6),Os08t0492100-02(-),Os09t0241100-01(OsWD40-166),Os09t0567700-01(OsWD40…
GO:0005575	Cellular Component	GO:0044422	organelle part	79	Os01t0126100-01(OsLPR1),Os01t0127300-01(OsABCI4),Os01t0744000-01(-),Os01t0928800-01(OsLCB2a1),Os02t0105100-01(-),Os02t0329800-01(XAX1),Os02t0612800-01(BIP135),Os02t0625000-01(OSCRY2),Os02t0670900-02(OsANT3),Os02t0770700-01(-),Os03t0210400-01(-),Os03t0343300-01(-),Os03t0376600-01(-),Os03t0381200-01(-),Os03t0381200-02(-),Os03t0616700-01(-),Os03t0640100-01(OsWD40-79),Os03t0728800-01(OsRH16),Os03t073…
GO:0005575	Cellular Component	GO:0016020	membrane	165	Os01t0126100-01(OsLPR1),Os01t0196600-01(-),Os01t0197100-01(D2),Os01t0210700-01(KAT2),Os01t0210700-02(KAT2),Os01t0239150-00(-),Os01t0310800-01(OsWAK4),Os01t0337160-00(-),Os01t0516900-00(OsABCG33),Os01t0533000-00(OsGSL9),Os01t0567500-01(OsMST8),Os01t0567600-00(OsMST7),Os01t0568800-00(OsRLCK37),Os01t0601000-00(OsEnS-10),Os01t0756700-01(KAT1),Os01t0759900-01(-),Os01t0782500-01(-),Os01t0825800-02(OsAT…
GO:0005575	Cellular Component	GO:0044425	membrane part	131	Os01t0126100-01(OsLPR1),Os01t0196600-01(-),Os01t0197100-01(D2),Os01t0210700-01(KAT2),Os01t0210700-02(KAT2),Os01t0239150-00(-),Os01t0337160-00(-),Os01t0516900-00(OsABCG33),Os01t0533000-00(OsGSL9),Os01t0567500-01(OsMST8),Os01t0567600-00(OsMST7),Os01t0601000-00(OsEnS-10),Os01t0756700-01(KAT1),Os01t0759900-01(-),Os01t0782500-01(-),Os01t0825800-02(OsATL7),Os01t0868200-01(-),Os01t0868200-02(-),Os01t092…

## Sheet:  zj-esa-vs-zj-esb
All enrichment GO terms of target of miRNAs between zj-esa and zj-esb in the comparison.
GO ID (level1)	GO Term (level1)	GO ID (level2)	GO Term (level2)	number_of_Pir1a-vs-Pir1b (All)	Genes_of_Pir1a-vs-Pir1b
GO:0008150	Biological Process	GO:0008152	metabolic process	364	Os01t0111500-01(OsbHLH125),Os01t0117200-01(OsRLCK16),Os01t0122200-01(-),Os01t0125900-01(OsUBC34),Os01t0126100-01(OsLPR1),Os01t0155500-01(OsCrRLK1L4),Os01t0172900-00(PG),Os01t0174600-01(OsC3H1),Os01t0183400-01(OsNF-YC13),Os01t0204000-01(-),Os01t0204000-02(-),Os01t0212500-01(OsSPEAR2),Os01t0217500-01(OsDJ-1A),Os01t0218100-01(OsbHLH037),Os01t0242500-01(-),Os01t0269000-01(-),Os01t0310800-01(OsWAK4),O…
GO:0008150	Biological Process	GO:0098754	detoxification	13	Os01t0327100-01(prx15),Os01t0327100-02(prx15),Os03t0368000-00(PRX42),Os03t0368300-01(prx43),Os03t0369000-01(PRX46),Os04t0473900-01(DWA1),Os04t0628200-01(prx56),Os04t0688200-01(prx60),Os05t0135000-01(prx68),Os07t0638600-00(prx105),Os07t0639400-01(prx108),Os10t0109300-01(PRX125),Os10t0109300-02(PRX125)
GO:0008150	Biological Process	GO:0065007	biological regulation	149	Os01t0111500-01(OsbHLH125),Os01t0174600-01(OsC3H1),Os01t0183400-01(OsNF-YC13),Os01t0212500-01(OsSPEAR2),Os01t0218100-01(OsbHLH037),Os01t0242500-01(-),Os01t0310800-01(OsWAK4),Os01t0321300-00(-),Os01t0665200-01(OsMPK20-4),Os01t0667900-01(GRX6),Os01t0675800-01(ONAC014),Os01t0680400-01(-),Os01t0710200-01(PAO1),Os01t0756200-01(OsbZIP06),Os01t0770200-01(TYDC),Os01t0812000-01(GAMYB),Os01t0812000-02(GAMY…
GO:0008150	Biological Process	GO:0032502	developmental process	38	Os01t0122200-01(-),Os01t0321300-00(-),Os01t0710200-01(PAO1),Os01t0812000-01(GAMYB),Os01t0812000-02(GAMYB),Os01t0831200-01(OsBAG4),Os02t0690500-01(OsPP2C26),Os03t0218300-01(-),Os03t0381200-01(-),Os03t0381200-02(-),Os03t0578900-00(OsGAMYBL2),Os03t0588800-01(-),Os03t0742800-01(-),Os03t0742800-02(-),Os03t0785800-01(OsPCF6),Os03t0818800-01(AP2/EREBP#033),Os04t0580700-01(MADS17),Os04t0649100-03(SHAT1),…
GO:0008150	Biological Process	GO:0040007	growth	7	Os02t0690500-01(OsPP2C26),Os07t0597200-01(-),Os07t0597200-02(-),Os08t0108100-01(-),Os09t0123200-01(OsFCA),Os09t0545700-01(OsSAUR41),Os11t0490600-01(LA1)
GO:0008150	Biological Process	GO:0050789	regulation of biological process	121	Os01t0111500-01(OsbHLH125),Os01t0174600-01(OsC3H1),Os01t0183400-01(OsNF-YC13),Os01t0212500-01(OsSPEAR2),Os01t0218100-01(OsbHLH037),Os01t0310800-01(OsWAK4),Os01t0321300-00(-),Os01t0665200-01(OsMPK20-4),Os01t0667900-01(GRX6),Os01t0675800-01(ONAC014),Os01t0680400-01(-),Os01t0710200-01(PAO1),Os01t0756200-01(OsbZIP06),Os01t0812000-01(GAMYB),Os01t0812000-02(GAMYB),Os01t0844800-01(-),Os02t0191800-01(-),…
GO:0008150	Biological Process	GO:0032501	multicellular organismal process	29	Os01t0122200-01(-),Os01t0669100-01(OsLSK1),Os01t0669100-02(OsLSK1),Os01t0812000-01(GAMYB),Os01t0812000-02(GAMYB),Os01t0831200-01(OsBAG4),Os02t0690500-01(OsPP2C26),Os03t0218300-01(-),Os03t0588800-01(-),Os03t0785800-01(OsPCF6),Os03t0818800-01(AP2/EREBP#033),Os04t0103500-01(YK28),Os04t0580700-01(MADS17),Os04t0649100-03(SHAT1),Os05t0121600-01(RSR1),Os05t0152900-00(-),Os05t0501400-01(-),Os06t0665400-0…
GO:0008150	Biological Process	GO:0051704	multi-organism process	14	Os01t0669100-01(OsLSK1),Os01t0669100-02(OsLSK1),Os04t0103500-01(YK28),Os04t0618700-01(Os-FLS2),Os05t0160300-01(OsLTPd8),Os05t0501400-01(-),Os06t0328400-01(-),Os07t0130200-01(-),Os07t0597200-01(-),Os07t0597200-02(-),Os08t0124000-02(-),Os10t0441900-01(-),Os11t0141900-00(-),Os12t0606000-00(-)
GO:0008150	Biological Process	GO:0008283	cell proliferation	2	Os03t0607600-00(CycA3),Os06t0665400-01(APO1)
GO:0008150	Biological Process	GO:0051179	localization	76	Os01t0321300-00(-),Os01t0355500-02(OsDjC5),Os01t0516900-00(OsABCG33),Os01t0567500-01(OsMST8),Os01t0567600-00(OsMST7),Os01t0584200-00(-),Os01t0684900-01(-),Os01t0827300-01(OsChI1),Os01t0842400-01(Oslacc),Os01t0842500-01(OsLAC5),Os01t0850550-00(OsLAC7),Os01t0850700-02(OsLAC8),Os01t0850800-00(OsLAC9),Os01t0925300-01(-),Os02t0102200-01(OsAAP7C),Os02t0191800-01(-),Os02t0470600-00(-),Os02t0574100-01(-)…
GO:0008150	Biological Process	GO:0022414	reproductive process	18	Os01t0669100-01(OsLSK1),Os01t0669100-02(OsLSK1),Os01t0812000-01(GAMYB),Os01t0812000-02(GAMYB),Os01t0831200-01(OsBAG4),Os02t0770700-01(-),Os03t0218300-01(-),Os03t0588800-01(-),Os03t0818800-01(AP2/EREBP#033),Os04t0103500-01(YK28),Os04t0580700-01(MADS17),Os04t0649100-03(SHAT1),Os05t0121600-01(RSR1),Os05t0501400-01(-),Os06t0665400-01(APO1),Os07t0235800-01(SNB),Os09t0123200-01(OsFCA),Os11t0199200-01(E…
GO:0008150	Biological Process	GO:0000003	reproduction	18	Os01t0669100-01(OsLSK1),Os01t0669100-02(OsLSK1),Os01t0812000-01(GAMYB),Os01t0812000-02(GAMYB),Os01t0831200-01(OsBAG4),Os02t0770700-01(-),Os03t0218300-01(-),Os03t0588800-01(-),Os03t0818800-01(AP2/EREBP#033),Os04t0103500-01(YK28),Os04t0580700-01(MADS17),Os04t0649100-03(SHAT1),Os05t0121600-01(RSR1),Os05t0501400-01(-),Os06t0665400-01(APO1),Os07t0235800-01(SNB),Os09t0123200-01(OsFCA),Os11t0199200-01(E…
GO:0008150	Biological Process	GO:0050896	response to stimulus	88	Os01t0203800-01(-),Os01t0203800-02(-),Os01t0204000-01(-),Os01t0310800-01(OsWAK4),Os01t0321300-00(-),Os01t0327100-01(prx15),Os01t0327100-02(prx15),Os01t0665200-01(OsMPK20-4),Os01t0684900-01(-),Os01t0831200-01(OsBAG4),Os01t0948400-01(OsP5CR),Os02t0111900-01(-),Os02t0513000-01(OsRLCK72),Os02t0554100-01(-),Os02t0612800-01(BIP135),Os02t0689900-01(OsNRT1.5A),Os02t0821400-01(OsRLCK90),Os02t0821400-02(Os…
GO:0008150	Biological Process	GO:0048511	rhythmic process	1	Os05t0549100-02(OsSTN7)
GO:0008150	Biological Process	GO:0048518	positive regulation of biological process	18	Os01t0111500-01(OsbHLH125),Os01t0174600-01(OsC3H1),Os01t0680400-01(-),Os01t0756200-01(OsbZIP06),Os02t0649300-01(HOX24),Os03t0205300-00(OsbHLH129),Os03t0607600-00(CycA3),Os04t0493100-01(OsbHLH065),Os04t0541700-02(HOX22),Os04t0580700-01(MADS17),Os06t0496400-01(OsbHLH127),Os06t0664800-01(-),Os08t0179400-00(OsbHLH070),Os08t0487100-01(OsbZIP67),Os09t0123200-01(OsFCA),Os11t0141900-00(-),Os11t0184900-02…
GO:0008150	Biological Process	GO:0002376	immune system process	2	Os05t0160300-01(OsLTPd8),Os11t0141900-00(-)
GO:0008150	Biological Process	GO:0023052	signaling	25	Os01t0310800-01(OsWAK4),Os01t0665200-01(OsMPK20-4),Os02t0513000-01(OsRLCK72),Os02t0821400-01(OsRLCK90),Os02t0821400-02(OsRLCK90),Os03t0227900-00(-),Os03t0246800-01(-),Os03t0246800-02(-),Os04t0517500-01(-),Os04t0673300-01(RR6),Os06t0186300-00(-),Os07t0130200-01(-),Os08t0124000-02(-),Os08t0129900-00(-),Os08t0458600-01(OsRR33),Os10t0152000-00(OsWAK105),Os10t0441900-01(-),Os10t0482900-01(OsGRL19),Os1…
GO:0008150	Biological Process	GO:0009987	cellular process	320	Os01t0111500-01(OsbHLH125),Os01t0117200-01(OsRLCK16),Os01t0122200-01(-),Os01t0125900-01(OsUBC34),Os01t0155500-01(OsCrRLK1L4),Os01t0159200-01(OsFLA8),Os01t0174600-01(OsC3H1),Os01t0183400-01(OsNF-YC13),Os01t0204000-01(-),Os01t0204000-02(-),Os01t0212500-01(OsSPEAR2),Os01t0217500-01(OsDJ-1A),Os01t0218100-01(OsbHLH037),Os01t0242500-01(-),Os01t0269000-01(-),Os01t0310800-01(OsWAK4),Os01t0311100-00(OsRFP…
GO:0008150	Biological Process	GO:0048519	negative regulation of biological process	12	Os01t0174600-01(OsC3H1),Os02t0741500-01(-),Os03t0381200-01(-),Os03t0381200-02(-),Os03t0683300-01(-),Os04t0415100-01(OsOFP10),Os04t0577700-01(OsOFP11),Os05t0121600-01(RSR1),Os08t0107900-02(OsMAGO1),Os11t0232000-00(OsSRP-GMS),Os12t0147200-01(-),Os12t0156400-01(-)
GO:0008150	Biological Process	GO:0071840	cellular component organization or biogenesis	38	Os01t0159200-01(OsFLA8),Os01t0321300-00(-),Os01t0355500-02(OsDjC5),Os01t0584200-00(-),Os01t0680400-01(-),Os01t0686600-01(-),Os01t0911000-01(-),Os02t0111900-01(-),Os02t0543300-00(-),Os02t0556000-00(-),Os02t0612800-01(BIP135),Os02t0690500-01(OsPP2C26),Os02t0741500-01(-),Os02t0770700-01(-),Os03t0314700-01(OsISC11),Os03t0381200-01(-),Os03t0381200-02(-),Os03t0607600-00(CycA3),Os03t0742800-01(-),Os03t0…
GO:0003674	Molecular Function	GO:0140110	transcription regulator activity	46	Os01t0111500-01(OsbHLH125),Os01t0183400-01(OsNF-YC13),Os01t0212500-01(OsSPEAR2),Os01t0680400-01(-),Os01t0756200-01(OsbZIP06),Os01t0812000-01(GAMYB),Os01t0812000-02(GAMYB),Os02t0649300-01(HOX24),Os02t0656600-00(OsERF#032),Os02t0662700-01(OsHAM1),Os02t0663100-01(OsHAM2),Os03t0205300-00(OsbHLH129),Os03t0232200-01(OsPLT9),Os03t0263300-01(NSP2),Os03t0578900-00(OsGAMYBL2),Os03t0785800-01(OsPCF6),Os03t0…
GO:0003674	Molecular Function	GO:0016209	antioxidant activity	13	Os01t0327100-01(prx15),Os01t0327100-02(prx15),Os03t0368000-00(PRX42),Os03t0368300-01(prx43),Os03t0369000-01(PRX46),Os04t0473900-01(DWA1),Os04t0628200-01(prx56),Os04t0688200-01(prx60),Os05t0135000-01(prx68),Os07t0638600-00(prx105),Os07t0639400-01(prx108),Os10t0109300-01(PRX125),Os10t0109300-02(PRX125)
GO:0003674	Molecular Function	GO:0140104	molecular carrier activity	3	Os05t0353400-01(OsImpbeta1),Os05t0517600-00(OsHB5),Os11t0695900-01(-)
GO:0003674	Molecular Function	GO:0045735	nutrient reservoir activity	4	Os03t0197300-01(-),Os03t0693900-00(OsOxO3),Os03t0694000-01(Osoxo4),Os08t0127900-01(OsEnS-115)
GO:0003674	Molecular Function	GO:0005488	binding	378	Os01t0111500-01(OsbHLH125),Os01t0117200-01(OsRLCK16),Os01t0122200-01(-),Os01t0126100-01(OsLPR1),Os01t0137700-01(-),Os01t0155500-01(OsCrRLK1L4),Os01t0165200-02(-),Os01t0174600-01(OsC3H1),Os01t0183400-01(OsNF-YC13),Os01t0218100-01(OsbHLH037),Os01t0232200-00(OsWD40-10),Os01t0242500-01(-),Os01t0310800-01(OsWAK4),Os01t0321300-00(-),Os01t0327100-01(prx15),Os01t0327100-02(prx15),Os01t0355500-02(OsDjC5),…
GO:0003674	Molecular Function	GO:0060089	molecular transducer activity	12	Os01t0310800-01(OsWAK4),Os02t0513000-01(OsRLCK72),Os02t0554100-01(-),Os02t0821400-01(OsRLCK90),Os02t0821400-02(OsRLCK90),Os03t0227900-00(-),Os06t0328400-01(-),Os07t0130200-01(-),Os08t0124000-02(-),Os10t0441900-01(-),Os12t0180500-00(OsRLCK361),Os12t0606000-00(-)
GO:0003674	Molecular Function	GO:0003824	catalytic activity	302	Os01t0117200-01(OsRLCK16),Os01t0125900-01(OsUBC34),Os01t0126100-01(OsLPR1),Os01t0155500-01(OsCrRLK1L4),Os01t0172900-00(PG),Os01t0179600-01(OsUGT75K1),Os01t0196600-01(-),Os01t0199400-01(-),Os01t0204000-01(-),Os01t0204000-02(-),Os01t0217500-01(OsDJ-1A),Os01t0242500-01(-),Os01t0269000-01(-),Os01t0310800-01(OsWAK4),Os01t0311100-00(OsRFPH2-4),Os01t0321300-00(-),Os01t0327100-01(prx15),Os01t0327100-02(p…
GO:0003674	Molecular Function	GO:0098772	molecular function regulator	14	Os02t0198300-01(-),Os02t0198300-02(-),Os03t0246800-01(-),Os03t0246800-02(-),Os03t0283800-01(-),Os03t0607600-00(CycA3),Os03t0742800-01(-),Os03t0742800-02(-),Os07t0691100-01(OsPME23),Os08t0108100-01(-),Os11t0232000-00(OsSRP-GMS),Os12t0156400-01(-),Os12t0283400-01(-),Os12t0561500-00(-)
GO:0003674	Molecular Function	GO:0090729	toxin activity	1	Os03t0683300-01(-)
GO:0003674	Molecular Function	GO:0005215	transporter activity	28	Os01t0321300-00(-),Os01t0516900-00(OsABCG33),Os01t0567500-01(OsMST8),Os01t0567600-00(OsMST7),Os01t0684900-01(-),Os02t0102200-01(OsAAP7C),Os02t0574100-01(-),Os02t0689900-01(OsNRT1.5A),Os02t0693700-02(OsABCB11),Os02t0722400-01(OsAAP3),Os03t0178100-00(OsHMA6),Os03t0202200-01(OSVDAC4),Os03t0574900-01(OsHAK27),Os03t0689300-01(OSA1),Os03t0689300-02(OSA1),Os03t0817200-01(OsANT2),Os05t0353400-01(OsImpbet…
GO:0003674	Molecular Function	GO:0005198	structural molecule activity	5	Os02t0741500-01(-),Os06t0300600-01(-),Os07t0461500-00(OsSTA194),Os11t0550800-01(-),Os12t0165900-01(OsNucAP2)
GO:0005575	Cellular Component	GO:0005576	extracellular region	41	Os01t0327100-01(prx15),Os01t0634500-00(OsLAC2),Os01t0827300-01(OsChI1),Os01t0842400-01(Oslacc),Os01t0842500-01(OsLAC5),Os01t0850550-00(OsLAC7),Os01t0850700-02(OsLAC8),Os01t0850800-00(OsLAC9),Os02t0749700-01(OsLAC10),Os03t0273200-01(Lac),Os03t0273200-02(Lac),Os03t0368000-00(PRX42),Os03t0368300-01(prx43),Os03t0369000-01(PRX46),Os03t0693900-00(OsOxO3),Os03t0694000-01(Osoxo4),Os04t0688200-01(prx60),O…
GO:0005575	Cellular Component	GO:0005623	cell	350	Os01t0111500-01(OsbHLH125),Os01t0122200-01(-),Os01t0125900-01(OsUBC34),Os01t0126100-01(OsLPR1),Os01t0155500-01(OsCrRLK1L4),Os01t0159200-01(OsFLA8),Os01t0174600-01(OsC3H1),Os01t0178100-01(-),Os01t0179600-01(OsUGT75K1),Os01t0183400-01(OsNF-YC13),Os01t0196600-01(-),Os01t0199400-01(-),Os01t0204000-01(-),Os01t0204000-02(-),Os01t0217500-01(OsDJ-1A),Os01t0218100-01(OsbHLH037),Os01t0242500-01(-),Os01t026…
GO:0005575	Cellular Component	GO:0044464	cell part	345	Os01t0111500-01(OsbHLH125),Os01t0122200-01(-),Os01t0125900-01(OsUBC34),Os01t0126100-01(OsLPR1),Os01t0155500-01(OsCrRLK1L4),Os01t0159200-01(OsFLA8),Os01t0174600-01(OsC3H1),Os01t0178100-01(-),Os01t0179600-01(OsUGT75K1),Os01t0183400-01(OsNF-YC13),Os01t0196600-01(-),Os01t0199400-01(-),Os01t0204000-01(-),Os01t0204000-02(-),Os01t0217500-01(OsDJ-1A),Os01t0218100-01(OsbHLH037),Os01t0242500-01(-),Os01t026…
GO:0005575	Cellular Component	GO:0055044	symplast	13	Os01t0155500-01(OsCrRLK1L4),Os01t0327100-01(prx15),Os03t0368000-00(PRX42),Os03t0368300-01(prx43),Os03t0369000-01(PRX46),Os03t0718100-01(ACT1),Os04t0416700-01(-),Os04t0628200-01(prx56),Os04t0688200-01(prx60),Os05t0135000-01(prx68),Os05t0485800-00(-),Os07t0638600-00(prx105),Os07t0639400-01(prx108)
GO:0005575	Cellular Component	GO:0030054	cell junction	13	Os01t0155500-01(OsCrRLK1L4),Os01t0327100-01(prx15),Os03t0368000-00(PRX42),Os03t0368300-01(prx43),Os03t0369000-01(PRX46),Os03t0718100-01(ACT1),Os04t0416700-01(-),Os04t0628200-01(prx56),Os04t0688200-01(prx60),Os05t0135000-01(prx68),Os05t0485800-00(-),Os07t0638600-00(prx105),Os07t0639400-01(prx108)
GO:0005575	Cellular Component	GO:0099080	supramolecular complex	3	Os01t0744000-01(-),Os03t0381200-01(-),Os03t0381200-02(-)
GO:0005575	Cellular Component	GO:0043226	organelle	229	Os01t0111500-01(OsbHLH125),Os01t0122200-01(-),Os01t0126100-01(OsLPR1),Os01t0178100-01(-),Os01t0179600-01(OsUGT75K1),Os01t0183400-01(OsNF-YC13),Os01t0196600-01(-),Os01t0199400-01(-),Os01t0204000-01(-),Os01t0204000-02(-),Os01t0217500-01(OsDJ-1A),Os01t0218100-01(OsbHLH037),Os01t0269000-01(-),Os01t0321300-00(-),Os01t0355500-02(OsDjC5),Os01t0495900-01(-),Os01t0527900-00(-),Os01t0584200-00(-),Os01t0667…
GO:0005575	Cellular Component	GO:0044421	extracellular region part	2	Os09t0564200-01(-),Os11t0232000-00(OsSRP-GMS)
GO:0005575	Cellular Component	GO:0016020	membrane	191	Os01t0126100-01(OsLPR1),Os01t0155500-01(OsCrRLK1L4),Os01t0159200-01(OsFLA8),Os01t0196600-01(-),Os01t0199400-01(-),Os01t0199400-02(-),Os01t0203400-01(OsCEP7),Os01t0310800-01(OsWAK4),Os01t0311100-00(OsRFPH2-4),Os01t0321300-00(-),Os01t0516900-00(OsABCG33),Os01t0567500-01(OsMST8),Os01t0567600-00(OsMST7),Os01t0568800-00(OsRLCK37),Os01t0665250-00(-),Os01t0669100-01(OsLSK1),Os01t0669100-02(OsLSK1),Os01t…
GO:0005575	Cellular Component	GO:0031974	membrane-enclosed lumen	11	Os01t0183400-01(OsNF-YC13),Os01t0204000-01(-),Os01t0204000-02(-),Os01t0680400-01(-),Os01t0911000-01(-),Os05t0353400-01(OsImpbeta1),Os06t0300600-01(-),Os09t0481650-00(-),Os11t0199200-01(ESP2),Os12t0242900-01(-),Os12t0446500-00(-)
GO:0005575	Cellular Component	GO:0044425	membrane part	147	Os01t0126100-01(OsLPR1),Os01t0155500-01(OsCrRLK1L4),Os01t0196600-01(-),Os01t0199400-01(-),Os01t0199400-02(-),Os01t0203400-01(OsCEP7),Os01t0311100-00(OsRFPH2-4),Os01t0516900-00(OsABCG33),Os01t0567500-01(OsMST8),Os01t0567600-00(OsMST7),Os01t0665250-00(-),Os01t0669100-01(OsLSK1),Os01t0669100-02(OsLSK1),Os01t0684900-01(-),Os01t0801500-01(Gns7),Os01t0907300-01(-),Os01t0907300-02(-),Os01t0925300-01(-),…
GO:0005575	Cellular Component	GO:0032991	protein-containing complex	43	Os01t0183400-01(OsNF-YC13),Os01t0204000-01(-),Os01t0204000-02(-),Os01t0527900-00(-),Os01t0680400-01(-),Os01t0686600-01(-),Os01t0744000-01(-),Os01t0907300-01(-),Os01t0907300-02(-),Os01t0911000-01(-),Os02t0272600-01(-),Os02t0543300-00(-),Os02t0741500-01(-),Os03t0202200-01(OSVDAC4),Os03t0265500-01(OsCOI2),Os03t0265500-02(OsCOI2),Os03t0381200-01(-),Os03t0381200-02(-),Os03t0607600-00(CycA3),Os03t07428…
GO:0005575	Cellular Component	GO:0044422	organelle part	56	Os01t0126100-01(OsLPR1),Os01t0183400-01(OsNF-YC13),Os01t0204000-01(-),Os01t0204000-02(-),Os01t0321300-00(-),Os01t0495900-01(-),Os01t0680400-01(-),Os01t0686600-01(-),Os01t0744000-01(-),Os01t0862200-02(-),Os01t0907300-01(-),Os01t0907300-02(-),Os01t0911000-01(-),Os02t0539100-01(-),Os02t0612800-01(BIP135),Os02t0741500-01(-),Os02t0770700-01(-),Os03t0178100-00(OsHMA6),Os03t0202200-01(OSVDAC4),Os03t0246…

## Sheet: zj-esa-vs-zj-esc
All enrichment GO terms of target of miRNAs between zj-esa and zj-esc in the comparison.
GO ID (level1)	GO Term (level1)	GO ID (level2)	GO Term (level2)	number_of_Pir1a-vs-Pir1c (All)	Genes_of_Pir1a-vs-Pir1c
GO:0008150	Biological Process	GO:0050896	response to stimulus	177	Os01t0149350-00(-),Os01t0149500-01(PIT),Os01t0166800-01(-),Os01t0176900-00(-),Os01t0308300-00(-),Os01t0310800-01(OsWAK4),Os01t0321300-00(-),Os01t0571300-01(OsHsfA7),Os01t0625300-01(HSFC1A),Os01t0665200-01(OsMPK20-4),Os01t0683400-01(OsORC4),Os01t0730900-01(-),Os01t0733200-01(OsHsfC1b),Os01t0741900-01(IAA6),Os01t0869300-01(-),Os01t0923900-01(OsFbox053),Os01t0927600-01(OsARF4),Os01t0948400-01(OsP5CR…
GO:0008150	Biological Process	GO:0065007	biological regulation	254	Os01t0124200-02(RBBI3-1),Os01t0152500-00(-),Os01t0176900-00(-),Os01t0196300-01(DPF),Os01t0212500-01(OsSPEAR2),Os01t0218100-01(OsbHLH037),Os01t0242500-01(-),Os01t0289600-00(OsWRKY9),Os01t0310800-01(OsWAK4),Os01t0321300-00(-),Os01t0328700-01(-),Os01t0367700-01(Orysa),Os01t0571300-01(OsHsfA7),Os01t0572300-01(OsIDD11),Os01t0575400-00(-),Os01t0625300-01(HSFC1A),Os01t0626400-01(WRKY11),Os01t0626400-02(…
GO:0008150	Biological Process	GO:0032502	developmental process	63	Os01t0122701-00(-),Os01t0321300-00(-),Os01t0513900-01(OsACK1),Os01t0710200-01(PAO1),Os01t0812000-01(GAMYB),Os01t0812000-02(GAMYB),Os01t0923900-01(OsFbox053),Os01t0934300-02(-),Os02t0690500-01(OsPP2C26),Os02t0739000-01(-),Os03t0203200-01(D14),Os03t0218300-01(-),Os03t0366100-01(OsCLE303),Os03t0381200-01(-),Os03t0381200-02(-),Os03t0578900-00(OsGAMYBL2),Os03t0588600-01(-),Os03t0637800-01(OsCR4),Os03t…
GO:0008150	Biological Process	GO:0032501	multicellular organismal process	56	Os01t0122701-00(-),Os01t0155200-00(-),Os01t0513900-01(OsACK1),Os01t0812000-01(GAMYB),Os01t0812000-02(GAMYB),Os01t0889900-01(-),Os01t0923900-01(OsFbox053),Os01t0934300-02(-),Os02t0690500-01(OsPP2C26),Os02t0739000-01(-),Os03t0203200-01(D14),Os03t0218300-01(-),Os03t0366100-01(OsCLE303),Os03t0588600-01(-),Os03t0637800-01(OsCR4),Os03t0640100-01(OsWD40-79),Os03t0699000-01(OLE18),Os03t0751100-01(OPT),Os…
GO:0008150	Biological Process	GO:0050789	regulation of biological process	210	Os01t0124200-02(RBBI3-1),Os01t0152500-00(-),Os01t0176900-00(-),Os01t0196300-01(DPF),Os01t0212500-01(OsSPEAR2),Os01t0218100-01(OsbHLH037),Os01t0289600-00(OsWRKY9),Os01t0310800-01(OsWAK4),Os01t0321300-00(-),Os01t0328700-01(-),Os01t0367700-01(Orysa),Os01t0571300-01(OsHsfA7),Os01t0572300-01(OsIDD11),Os01t0575400-00(-),Os01t0625300-01(HSFC1A),Os01t0626400-01(WRKY11),Os01t0626400-02(WRKY11),Os01t066520…
GO:0008150	Biological Process	GO:0008152	metabolic process	615	Os01t0111100-01(OsCYP26-2),Os01t0117200-01(OsRLCK16),Os01t0122701-00(-),Os01t0124200-02(RBBI3-1),Os01t0125900-01(OsUBC34),Os01t0126100-01(OsLPR1),Os01t0126900-01(OsLPR4),Os01t0127000-01(OsLPR3),Os01t0152500-00(-),Os01t0155200-00(-),Os01t0155500-01(OsCrRLK1L4),Os01t0166800-01(-),Os01t0176900-00(-),Os01t0196300-01(DPF),Os01t0211000-00(-),Os01t0212500-01(OsSPEAR2),Os01t0218100-01(OsbHLH037),Os01t022…
GO:0008150	Biological Process	GO:0008283	cell proliferation	4	Os03t0607600-00(CycA3),Os03t0640100-01(OsWD40-79),Os04t0563700-01(cycB2),Os06t0665400-01(APO1)
GO:0008150	Biological Process	GO:0040007	growth	9	Os02t0690500-01(OsPP2C26),Os02t0731200-01(OsMADS57),Os04t0517600-00(-),Os04t0571200-01(OsRFPH2-14),Os05t0459700-01(OsFLA26),Os06t0203800-01(RLCK204),Os08t0108100-01(-),Os09t0545700-01(OsSAUR41),Os10t0577200-01(-)
GO:0008150	Biological Process	GO:0051179	localization	135	Os01t0172100-01(OsPPT3),Os01t0202800-00(OsNIP1),Os01t0207900-00(OsUMAMIT3),Os01t0232100-01(OsTIP4),Os01t0238700-01(OsYSL1),Os01t0321300-00(-),Os01t0504100-01(OsPUP8),Os01t0516900-00(OsABCG33),Os01t0567500-01(OsMST8),Os01t0567600-00(OsMST7),Os01t0584200-00(-),Os01t0601000-00(OsEnS-10),Os01t0759100-01(OsTLP12),Os01t0827300-01(OsChI1),Os01t0842400-01(Oslacc),Os01t0842500-01(OsLAC5),Os01t0850550-00(O…
GO:0008150	Biological Process	GO:0098754	detoxification	11	Os02t0741200-01(prx31),Os04t0473900-01(DWA1),Os04t0628200-01(prx56),Os06t0306300-01(prx78),Os06t0547100-00(prx87),Os06t0681600-01(prx89),Os06t0681600-02(prx89),Os07t0638600-00(prx105),Os08t0113000-01(prx117),Os11t0210600-01(Adh3),Os12t0178100-01(OsAPx6)
GO:0008150	Biological Process	GO:0048511	rhythmic process	2	Os06t0694000-01(OsZTL2),Os09t0535300-01(-)
GO:0008150	Biological Process	GO:0040011	locomotion	1	Os10t0370800-01(-)
GO:0008150	Biological Process	GO:0023052	signaling	54	Os01t0176900-00(-),Os01t0310800-01(OsWAK4),Os01t0665200-01(OsMPK20-4),Os01t0741900-01(IAA6),Os01t0923900-01(OsFbox053),Os01t0927600-01(OsARF4),Os02t0283800-01(TMS10),Os02t0532800-00(-),Os02t0603800-01(OsHDS),Os02t0666300-01(YDA2),Os02t0811200-00(OsWAK24),Os03t0633500-01(IAA11),Os03t0769500-01(-),Os04t0117300-02(-),Os04t0288500-01(-),Os04t0430400-01(-),Os04t0437600-01(-),Os04t0509000-01(-),Os04t05…
GO:0008150	Biological Process	GO:0022414	reproductive process	27	Os01t0155200-00(-),Os01t0812000-01(GAMYB),Os01t0812000-02(GAMYB),Os01t0889900-01(-),Os01t0934300-02(-),Os02t0739000-01(-),Os02t0770700-01(-),Os03t0218300-01(-),Os03t0588600-01(-),Os03t0637800-01(OsCR4),Os03t0640100-01(OsWD40-79),Os03t0699000-01(OLE18),Os03t0818800-01(AP2/EREBP#033),Os04t0483500-01(KCR1),Os04t0517600-00(-),Os04t0649100-03(SHAT1),Os05t0121600-01(RSR1),Os05t0459700-01(OsFLA26),Os06t…
GO:0008150	Biological Process	GO:0000003	reproduction	27	Os01t0155200-00(-),Os01t0812000-01(GAMYB),Os01t0812000-02(GAMYB),Os01t0889900-01(-),Os01t0934300-02(-),Os02t0739000-01(-),Os02t0770700-01(-),Os03t0218300-01(-),Os03t0588600-01(-),Os03t0637800-01(OsCR4),Os03t0640100-01(OsWD40-79),Os03t0699000-01(OLE18),Os03t0818800-01(AP2/EREBP#033),Os04t0483500-01(KCR1),Os04t0517600-00(-),Os04t0649100-03(SHAT1),Os05t0121600-01(RSR1),Os05t0459700-01(OsFLA26),Os06t…
GO:0008150	Biological Process	GO:0048518	positive regulation of biological process	30	Os01t0367700-01(Orysa),Os01t0571300-01(OsHsfA7),Os01t0625300-01(HSFC1A),Os01t0733200-01(OsHsfC1b),Os02t0232000-01(HSFC2A),Os02t0579600-00(OsMADS27),Os02t0666300-01(YDA2),Os02t0671300-01(OsbHLH076),Os02t0731200-01(OsMADS57),Os03t0174400-00(OsERF#041),Os03t0607600-00(CycA3),Os03t0625933-00(-),Os03t0626100-01(-),Os03t0640100-01(OsWD40-79),Os04t0304400-01(OsMADS25),Os04t0437600-01(-),Os04t0563700-01(…
GO:0008150	Biological Process	GO:0002376	immune system process	2	Os02t0603800-01(OsHDS),Os05t0368100-00(-)
GO:0008150	Biological Process	GO:0048519	negative regulation of biological process	24	Os01t0124200-02(RBBI3-1),Os02t0672200-01(OsAGO1a),Os02t0739000-01(-),Os02t0831600-01(OsAGO1c),Os03t0279200-01(-),Os03t0381200-01(-),Os03t0381200-02(-),Os03t0853700-01(-),Os04t0566500-01(OsAGO1b),Os04t0566500-02(OsAGO1b),Os04t0571200-01(OsRFPH2-14),Os04t0582900-01(-),Os05t0121600-01(RSR1),Os05t0390600-00(-),Os06t0300800-01(OsWD40-128),Os06t0597400-01(PNH1),Os06t0643700-01(-),Os06t0725900-01(OsFtsH…
GO:0008150	Biological Process	GO:0051704	multi-organism process	14	Os01t0155200-00(-),Os01t0889900-01(-),Os02t0603800-01(OsHDS),Os03t0760200-01(bel),Os04t0109400-00(-),Os04t0288500-01(-),Os04t0531500-01(-),Os04t0618700-01(Os-FLS2),Os05t0368100-00(-),Os06t0328400-01(-),Os06t0498400-01(-),Os07t0575700-01(SIT3),Os10t0441900-01(-),Os12t0606000-00(-)
GO:0008150	Biological Process	GO:0071840	cellular component organization or biogenesis	97	Os01t0166800-01(-),Os01t0267600-01(-),Os01t0321300-00(-),Os01t0363300-01(-),Os01t0363300-02(-),Os01t0368700-01(-),Os01t0502700-00(-),Os01t0584200-00(-),Os01t0642900-01(SSB),Os01t0869300-01(-),Os01t0911000-01(-),Os02t0102900-01(OsCPn60beta2),Os02t0111900-01(-),Os02t0119400-01(-),Os02t0123200-01(-),Os02t0588300-01(-),Os02t0612700-01(-),Os02t0612800-01(BIP135),Os02t0690500-01(OsPP2C26),Os02t0739000-…
GO:0008150	Biological Process	GO:0009987	cellular process	566	Os01t0111100-01(OsCYP26-2),Os01t0117200-01(OsRLCK16),Os01t0122701-00(-),Os01t0124200-02(RBBI3-1),Os01t0125900-01(OsUBC34),Os01t0152500-00(-),Os01t0155200-00(-),Os01t0155500-01(OsCrRLK1L4),Os01t0166800-01(-),Os01t0176900-00(-),Os01t0196300-01(DPF),Os01t0212500-01(OsSPEAR2),Os01t0218100-01(OsbHLH037),Os01t0238500-01(-),Os01t0238500-02(-),Os01t0242500-01(-),Os01t0267600-01(-),Os01t0269000-01(-),Os01…
GO:0003674	Molecular Function	GO:0140110	transcription regulator activity	67	Os01t0176900-00(-),Os01t0212500-01(OsSPEAR2),Os01t0289600-00(OsWRKY9),Os01t0571300-01(OsHsfA7),Os01t0572300-01(OsIDD11),Os01t0625300-01(HSFC1A),Os01t0626400-01(WRKY11),Os01t0626400-02(WRKY11),Os01t0693400-01(AP2/EREBP#127),Os01t0733200-01(OsHsfC1b),Os01t0812000-01(GAMYB),Os01t0812000-02(GAMYB),Os01t0935000-01(OsIDD9),Os02t0202000-01(ERF3),Os02t0232000-01(HSFC2A),Os02t0579600-00(OsMADS27),Os02t066…
GO:0003674	Molecular Function	GO:0060089	molecular transducer activity	21	Os01t0310800-01(OsWAK4),Os01t0367700-01(Orysa),Os01t0575400-00(-),Os02t0283800-01(TMS10),Os04t0109400-00(-),Os04t0288500-01(-),Os04t0430400-01(-),Os04t0509000-01(-),Os04t0531500-01(-),Os05t0387700-01(OsRLCK186),Os05t0387700-02(OsRLCK186),Os06t0190700-00(OsGLR4.8),Os06t0328400-01(-),Os06t0643700-01(-),Os06t0694000-01(OsZTL2),Os07t0575700-01(SIT3),Os07t0596600-02(Orysa),Os08t0376600-01(-),Os10t0441…
GO:0003674	Molecular Function	GO:0045735	nutrient reservoir activity	6	Os03t0197300-01(-),Os03t0336100-01(CDP3.2),Os03t0693900-00(OsOxO3),Os03t0694000-01(Osoxo4),Os05t0277500-01(OsGLP5-2),Os07t0216700-01(-)
GO:0003674	Molecular Function	GO:0005215	transporter activity	79	Os01t0172100-01(OsPPT3),Os01t0202800-00(OsNIP1),Os01t0207900-00(OsUMAMIT3),Os01t0232100-01(OsTIP4),Os01t0321300-00(-),Os01t0504100-01(OsPUP8),Os01t0516900-00(OsABCG33),Os01t0567500-01(OsMST8),Os01t0567600-00(OsMST7),Os01t0601000-00(OsEnS-10),Os01t0871500-01(-),Os02t0190000-00(-),Os02t0211000-00(OsABCA1),Os02t0301100-01(OsSWEET4),Os02t0670900-02(OsANT3),Os02t0676400-00(-),Os02t0693700-02(OsABCB11)…
GO:0003674	Molecular Function	GO:0003824	catalytic activity	529	Os01t0111100-01(OsCYP26-2),Os01t0117200-01(OsRLCK16),Os01t0125900-01(OsUBC34),Os01t0126100-01(OsLPR1),Os01t0126900-01(OsLPR4),Os01t0127000-01(OsLPR3),Os01t0155200-00(-),Os01t0155500-01(OsCrRLK1L4),Os01t0196600-01(-),Os01t0199400-01(-),Os01t0211000-00(-),Os01t0227800-01(-),Os01t0238500-01(-),Os01t0238500-02(-),Os01t0242500-01(-),Os01t0268600-01(-),Os01t0269000-01(-),Os01t0300200-01(-),Os01t0300200…
GO:0003674	Molecular Function	GO:0005488	binding	658	Os01t0117200-01(OsRLCK16),Os01t0126100-01(OsLPR1),Os01t0126900-01(OsLPR4),Os01t0127000-01(OsLPR3),Os01t0139200-01(-),Os01t0139200-02(-),Os01t0149350-00(-),Os01t0149500-01(PIT),Os01t0152500-00(-),Os01t0155200-00(-),Os01t0155500-01(OsCrRLK1L4),Os01t0165200-02(-),Os01t0166800-01(-),Os01t0170800-01(-),Os01t0196300-01(DPF),Os01t0211000-00(-),Os01t0218100-01(OsbHLH037),Os01t0227800-01(-),Os01t0234100-0…
GO:0003674	Molecular Function	GO:0031386	protein tag	1	Os03t0808400-00(-)
GO:0003674	Molecular Function	GO:0140104	molecular carrier activity	2	Os07t0613300-01(-),Os07t0613300-02(-)
GO:0003674	Molecular Function	GO:0016209	antioxidant activity	10	Os02t0741200-01(prx31),Os04t0473900-01(DWA1),Os04t0628200-01(prx56),Os06t0306300-01(prx78),Os06t0547100-00(prx87),Os06t0681600-01(prx89),Os06t0681600-02(prx89),Os07t0638600-00(prx105),Os08t0113000-01(prx117),Os12t0178100-01(OsAPx6)
GO:0003674	Molecular Function	GO:0098772	molecular function regulator	14	Os01t0124200-02(RBBI3-1),Os01t0849100-01(OsRacGEF1),Os02t0198300-01(-),Os02t0198300-02(-),Os02t0608550-00(-),Os03t0283800-01(-),Os03t0607600-00(CycA3),Os04t0117300-02(-),Os04t0563700-01(cycB2),Os05t0390600-00(-),Os07t0216700-01(-),Os08t0108100-01(-),Os08t0220400-01(OsPME24),Os09t0542700-00(-)
GO:0003674	Molecular Function	GO:0005198	structural molecule activity	7	Os02t0205000-01(-),Os03t0576700-01(RPL13b),Os06t0683200-01(-),Os06t0701400-01(-),Os07t0685400-01(-),Os09t0501200-01(rpL32_9.1),Os11t0550800-01(-)
GO:0005575	Cellular Component	GO:0055044	symplast	21	Os01t0155500-01(OsCrRLK1L4),Os02t0719700-01(OsBAG6),Os03t0336100-01(CDP3.2),Os03t0751100-01(OPT),Os03t0791700-01(-),Os04t0628200-01(prx56),Os05t0277500-01(OsGLP5-2),Os05t0317900-01(OsCrRLK1L2),Os05t0367900-01(-),Os05t0485800-00(-),Os06t0133600-01(-),Os06t0133600-02(-),Os06t0306300-01(prx78),Os06t0334300-01(OsCrRLK1L14),Os06t0681600-01(prx89),Os07t0134700-00(-),Os07t0166700-01(-),Os07t0406800-01(-…
GO:0005575	Cellular Component	GO:0030054	cell junction	21	Os01t0155500-01(OsCrRLK1L4),Os02t0719700-01(OsBAG6),Os03t0336100-01(CDP3.2),Os03t0751100-01(OPT),Os03t0791700-01(-),Os04t0628200-01(prx56),Os05t0277500-01(OsGLP5-2),Os05t0317900-01(OsCrRLK1L2),Os05t0367900-01(-),Os05t0485800-00(-),Os06t0133600-01(-),Os06t0133600-02(-),Os06t0306300-01(prx78),Os06t0334300-01(OsCrRLK1L14),Os06t0681600-01(prx89),Os07t0134700-00(-),Os07t0166700-01(-),Os07t0406800-01(-…
GO:0005575	Cellular Component	GO:0005576	extracellular region	44	Os01t0124200-02(RBBI3-1),Os01t0533400-01(OsBgal5),Os01t0634500-00(OsLAC2),Os01t0679550-00(-),Os01t0827300-01(OsChI1),Os01t0842400-01(Oslacc),Os01t0842500-01(OsLAC5),Os01t0850550-00(OsLAC7),Os01t0850700-02(OsLAC8),Os01t0850800-00(OsLAC9),Os02t0749700-01(OsLAC10),Os03t0261100-01(PLA2-II),Os03t0273200-01(Lac),Os03t0273200-02(Lac),Os03t0693900-00(OsOxO3),Os03t0694000-01(Osoxo4),Os04t0165000-01(-),Os0…
GO:0005575	Cellular Component	GO:0044464	cell part	607	Os01t0111100-01(OsCYP26-2),Os01t0122701-00(-),Os01t0125900-01(OsUBC34),Os01t0126100-01(OsLPR1),Os01t0127000-01(OsLPR3),Os01t0155200-00(-),Os01t0155500-01(OsCrRLK1L4),Os01t0166800-01(-),Os01t0170800-01(-),Os01t0172100-01(OsPPT3),Os01t0176800-01(-),Os01t0182832-00(-),Os01t0196300-01(DPF),Os01t0196600-01(-),Os01t0199400-01(-),Os01t0207900-00(OsUMAMIT3),Os01t0218100-01(OsbHLH037),Os01t0232100-01(OsTI…
GO:0005575	Cellular Component	GO:0005623	cell	612	Os01t0111100-01(OsCYP26-2),Os01t0122701-00(-),Os01t0125900-01(OsUBC34),Os01t0126100-01(OsLPR1),Os01t0127000-01(OsLPR3),Os01t0155200-00(-),Os01t0155500-01(OsCrRLK1L4),Os01t0166800-01(-),Os01t0170800-01(-),Os01t0172100-01(OsPPT3),Os01t0176800-01(-),Os01t0182832-00(-),Os01t0196300-01(DPF),Os01t0196600-01(-),Os01t0199400-01(-),Os01t0207900-00(OsUMAMIT3),Os01t0218100-01(OsbHLH037),Os01t0232100-01(OsTI…
GO:0005575	Cellular Component	GO:0099080	supramolecular complex	8	Os01t0513900-01(OsACK1),Os01t0744000-01(-),Os02t0588300-01(-),Os03t0381200-01(-),Os03t0381200-02(-),Os07t0115600-00(-),Os10t0512800-01(OsRFPHC-10),Os12t0577000-00(-)
GO:0005575	Cellular Component	GO:0044425	membrane part	333	Os01t0126100-01(OsLPR1),Os01t0127000-01(OsLPR3),Os01t0155200-00(-),Os01t0155500-01(OsCrRLK1L4),Os01t0172100-01(OsPPT3),Os01t0176800-01(-),Os01t0196600-01(-),Os01t0199400-01(-),Os01t0199400-02(-),Os01t0202800-00(OsNIP1),Os01t0207900-00(OsUMAMIT3),Os01t0227800-01(-),Os01t0232100-01(OsTIP4),Os01t0238700-01(OsYSL1),Os01t0346600-01(-),Os01t0363300-01(-),Os01t0363300-02(-),Os01t0368700-01(-),Os01t05041…
GO:0005575	Cellular Component	GO:0009295	nucleoid	2	Os01t0642900-01(SSB),Os05t0509700-01(SSB)
GO:0005575	Cellular Component	GO:0016020	membrane	385	Os01t0126100-01(OsLPR1),Os01t0127000-01(OsLPR3),Os01t0155200-00(-),Os01t0155500-01(OsCrRLK1L4),Os01t0172100-01(OsPPT3),Os01t0176800-01(-),Os01t0196600-01(-),Os01t0199400-01(-),Os01t0199400-02(-),Os01t0202800-00(OsNIP1),Os01t0207900-00(OsUMAMIT3),Os01t0227800-01(-),Os01t0232100-01(OsTIP4),Os01t0238700-01(OsYSL1),Os01t0310800-01(OsWAK4),Os01t0321300-00(-),Os01t0346600-01(-),Os01t0347100-01(-),Os01t…
GO:0005575	Cellular Component	GO:0043226	organelle	397	Os01t0111100-01(OsCYP26-2),Os01t0122701-00(-),Os01t0126100-01(OsLPR1),Os01t0127000-01(OsLPR3),Os01t0166800-01(-),Os01t0170800-01(-),Os01t0172100-01(OsPPT3),Os01t0176800-01(-),Os01t0196300-01(DPF),Os01t0196600-01(-),Os01t0199400-01(-),Os01t0218100-01(OsbHLH037),Os01t0232100-01(OsTIP4),Os01t0234100-01(-),Os01t0267600-01(-),Os01t0269000-01(-),Os01t0289600-00(OsWRKY9),Os01t0321300-00(-),Os01t0367700-…
GO:0005575	Cellular Component	GO:0031974	membrane-enclosed lumen	31	Os01t0166800-01(-),Os01t0367700-01(Orysa),Os01t0502700-00(-),Os01t0642900-01(SSB),Os01t0683400-01(OsORC4),Os01t0706900-01(-),Os01t0911000-01(-),Os03t0279200-01(-),Os03t0640100-01(OsWD40-79),Os03t0646800-01(-),Os03t0797700-01(-),Os03t0797700-02(-),Os03t0845700-01(-),Os05t0151000-00(-),Os05t0509700-01(SSB),Os07t0184900-01(OsKu70),Os07t0406800-01(-),Os07t0596600-02(Orysa),Os07t0613300-01(-),Os07t061…
GO:0005575	Cellular Component	GO:0044421	extracellular region part	1	Os09t0564200-01(-)
GO:0005575	Cellular Component	GO:0032991	protein-containing complex	99	Os01t0166800-01(-),Os01t0367700-01(Orysa),Os01t0502700-00(-),Os01t0513900-01(OsACK1),Os01t0527900-00(-),Os01t0533000-00(OsGSL9),Os01t0683400-01(OsORC4),Os01t0730900-01(-),Os01t0744000-01(-),Os01t0786800-01(-),Os01t0907300-01(-),Os01t0907300-02(-),Os01t0911000-01(-),Os01t0974701-01(-),Os02t0103800-01(OsLFNR1),Os02t0103800-03(OsLFNR1),Os02t0119400-01(-),Os02t0130900-01(-),Os02t0131700-00(-),Os02t01…
GO:0005575	Cellular Component	GO:0044422	organelle part	120	Os01t0126100-01(OsLPR1),Os01t0127000-01(OsLPR3),Os01t0166800-01(-),Os01t0172100-01(OsPPT3),Os01t0232100-01(OsTIP4),Os01t0267600-01(-),Os01t0321300-00(-),Os01t0367700-01(Orysa),Os01t0502700-00(-),Os01t0513900-01(OsACK1),Os01t0642900-01(SSB),Os01t0683400-01(OsORC4),Os01t0706900-01(-),Os01t0730900-01(-),Os01t0744000-01(-),Os01t0869300-01(-),Os01t0896500-01(OsStr10),Os01t0907300-01(-),Os01t0907300-02…

## Sheet:  zj-esb-vs-zj-esc
All enrichment GO terms of target of miRNAs between zj-esb and zj-esc in the comparison.
GO ID (level1)	GO Term (level1)	GO ID (level2)	GO Term (level2)	number_of_Pir1b-vs-Pir1c (All)	Genes_of_Pir1b-vs-Pir1c
GO:0008150	Biological Process	GO:0050896	response to stimulus	140	Os01t0106700-00(-),Os01t0149350-00(-),Os01t0149500-01(PIT),Os01t0166800-01(-),Os01t0176900-00(-),Os01t0197450-00(-),Os01t0292200-01(OsCIPK01),Os01t0308300-00(-),Os01t0566100-01(OsELF3.2),Os01t0566100-02(OsELF3.2),Os01t0571300-01(OsHsfA7),Os01t0622300-01(HEME),Os01t0625300-01(HSFC1A),Os01t0665200-01(OsMPK20-4),Os01t0683400-01(OsORC4),Os01t0684900-01(-),Os01t0730900-01(-),Os01t0733200-01(OsHsfC1b),…
GO:0008150	Biological Process	GO:0032501	multicellular organismal process	48	Os01t0122701-00(-),Os01t0566100-01(OsELF3.2),Os01t0566100-02(OsELF3.2),Os01t0812000-01(GAMYB),Os01t0812000-02(GAMYB),Os01t0889900-01(-),Os02t0739000-01(-),Os02t0811000-01(G1L6),Os03t0203200-01(D14),Os03t0366100-01(OsCLE303),Os03t0588600-01(-),Os03t0637800-01(OsCR4),Os03t0670200-01(-),Os03t0699000-01(OLE18),Os03t0751100-01(OPT),Os03t0785800-01(OsPCF6),Os03t0818800-01(AP2/EREBP#033),Os03t0851800-01…
GO:0008150	Biological Process	GO:0032502	developmental process	48	Os01t0122701-00(-),Os01t0566100-01(OsELF3.2),Os01t0566100-02(OsELF3.2),Os01t0812000-01(GAMYB),Os01t0812000-02(GAMYB),Os02t0739000-01(-),Os02t0811000-01(G1L6),Os03t0203200-01(D14),Os03t0366100-01(OsCLE303),Os03t0588600-01(-),Os03t0637800-01(OsCR4),Os03t0670200-01(-),Os03t0699000-01(OLE18),Os03t0785800-01(OsPCF6),Os03t0818800-01(AP2/EREBP#033),Os03t0851800-01(PANC),Os04t0483500-01(KCR1),Os04t051760…
GO:0008150	Biological Process	GO:0023052	signaling	51	Os01t0106700-00(-),Os01t0176900-00(-),Os01t0197450-00(-),Os01t0292200-01(OsCIPK01),Os01t0665200-01(OsMPK20-4),Os01t0927600-01(OsARF4),Os02t0283800-01(TMS10),Os02t0532800-00(-),Os02t0603800-01(OsHDS),Os02t0666300-01(YDA2),Os02t0811200-00(OsWAK24),Os03t0227900-00(-),Os03t0633500-01(IAA11),Os03t0769500-01(-),Os04t0288500-01(-),Os04t0430400-01(-),Os04t0437600-01(-),Os04t0459800-01(-),Os04t0509000-01(…
GO:0008150	Biological Process	GO:0022414	reproductive process	28	Os01t0566100-01(OsELF3.2),Os01t0566100-02(OsELF3.2),Os01t0812000-01(GAMYB),Os01t0812000-02(GAMYB),Os01t0889900-01(-),Os02t0739000-01(-),Os03t0588600-01(-),Os03t0637800-01(OsCR4),Os03t0670200-01(-),Os03t0699000-01(OLE18),Os03t0818800-01(AP2/EREBP#033),Os03t0851800-01(PANC),Os04t0103500-01(YK28),Os04t0483500-01(KCR1),Os04t0517600-00(-),Os04t0580700-01(MADS17),Os04t0649100-03(SHAT1),Os05t0121600-01(…
GO:0008150	Biological Process	GO:0000003	reproduction	28	Os01t0566100-01(OsELF3.2),Os01t0566100-02(OsELF3.2),Os01t0812000-01(GAMYB),Os01t0812000-02(GAMYB),Os01t0889900-01(-),Os02t0739000-01(-),Os03t0588600-01(-),Os03t0637800-01(OsCR4),Os03t0670200-01(-),Os03t0699000-01(OLE18),Os03t0818800-01(AP2/EREBP#033),Os03t0851800-01(PANC),Os04t0103500-01(YK28),Os04t0483500-01(KCR1),Os04t0517600-00(-),Os04t0580700-01(MADS17),Os04t0649100-03(SHAT1),Os05t0121600-01(…
GO:0008150	Biological Process	GO:0050789	regulation of biological process	157	Os01t0106700-00(-),Os01t0124200-02(RBBI3-1),Os01t0176900-00(-),Os01t0196300-01(DPF),Os01t0197450-00(-),Os01t0212500-01(OsSPEAR2),Os01t0218100-01(OsbHLH037),Os01t0289600-00(OsWRKY9),Os01t0292200-01(OsCIPK01),Os01t0367700-01(Orysa),Os01t0566100-01(OsELF3.2),Os01t0566100-02(OsELF3.2),Os01t0571300-01(OsHsfA7),Os01t0572300-01(OsIDD11),Os01t0575400-00(-),Os01t0625300-01(HSFC1A),Os01t0626400-01(WRKY11),…
GO:0008150	Biological Process	GO:0065007	biological regulation	178	Os01t0106700-00(-),Os01t0124200-02(RBBI3-1),Os01t0176900-00(-),Os01t0196300-01(DPF),Os01t0197450-00(-),Os01t0212500-01(OsSPEAR2),Os01t0218100-01(OsbHLH037),Os01t0289600-00(OsWRKY9),Os01t0292200-01(OsCIPK01),Os01t0367700-01(Orysa),Os01t0566100-01(OsELF3.2),Os01t0566100-02(OsELF3.2),Os01t0571300-01(OsHsfA7),Os01t0572300-01(OsIDD11),Os01t0575400-00(-),Os01t0625300-01(HSFC1A),Os01t0626400-01(WRKY11),…
GO:0008150	Biological Process	GO:0051179	localization	104	Os01t0172100-01(OsPPT3),Os01t0202800-00(OsNIP1),Os01t0207900-00(OsUMAMIT3),Os01t0232100-01(OsTIP4),Os01t0238700-01(OsYSL1),Os01t0504100-01(OsPUP8),Os01t0684900-01(-),Os01t0759100-01(OsTLP12),Os01t0868200-01(-),Os01t0868200-02(-),Os01t0871500-01(-),Os02t0102900-01(OsCPn60beta2),Os02t0119400-01(-),Os02t0190000-00(-),Os02t0211000-00(OsABCA1),Os02t0301100-01(OsSWEET4),Os02t0670900-02(OsANT3),Os02t068…
GO:0008150	Biological Process	GO:0040011	locomotion	1	Os10t0370800-01(-)
GO:0008150	Biological Process	GO:0098754	detoxification	8	Os02t0741200-01(prx31),Os04t0473900-01(DWA1),Os06t0547100-00(prx87),Os06t0681600-01(prx89),Os06t0681600-02(prx89),Os08t0113000-01(prx117),Os11t0210600-01(Adh3),Os12t0178100-01(OsAPx6)
GO:0008150	Biological Process	GO:0008283	cell proliferation	2	Os04t0563700-01(cycB2),Os06t0665400-01(APO1)
GO:0008150	Biological Process	GO:0008152	metabolic process	445	Os01t0106700-00(-),Os01t0122701-00(-),Os01t0124200-02(RBBI3-1),Os01t0126900-01(OsLPR4),Os01t0127000-01(OsLPR3),Os01t0166800-01(-),Os01t0176900-00(-),Os01t0196300-01(DPF),Os01t0197450-00(-),Os01t0211000-00(-),Os01t0212500-01(OsSPEAR2),Os01t0218100-01(OsbHLH037),Os01t0227800-01(-),Os01t0238500-01(-),Os01t0238500-02(-),Os01t0268600-01(-),Os01t0289600-00(OsWRKY9),Os01t0292200-01(OsCIPK01),Os01t030020…
GO:0008150	Biological Process	GO:0048518	positive regulation of biological process	25	Os01t0367700-01(Orysa),Os01t0571300-01(OsHsfA7),Os01t0625300-01(HSFC1A),Os01t0733200-01(OsHsfC1b),Os02t0232000-01(HSFC2A),Os02t0666300-01(YDA2),Os03t0174400-00(OsERF#041),Os03t0625933-00(-),Os03t0626100-01(-),Os03t0747600-02(-),Os03t0800800-01(-),Os04t0437600-01(-),Os04t0459800-01(-),Os04t0563700-01(cycB2),Os04t0568700-00(HSFB2A),Os04t0580700-01(MADS17),Os06t0191500-01(-),Os06t0553100-01(HSfC2b),…
GO:0008150	Biological Process	GO:0048511	rhythmic process	1	Os09t0535300-01(-)
GO:0008150	Biological Process	GO:0040007	growth	4	Os04t0517600-00(-),Os05t0459700-01(OsFLA26),Os06t0203800-01(RLCK204),Os10t0577200-01(-)
GO:0008150	Biological Process	GO:0071840	cellular component organization or biogenesis	79	Os01t0106700-00(-),Os01t0166800-01(-),Os01t0267600-01(-),Os01t0363300-01(-),Os01t0363300-02(-),Os01t0368700-01(-),Os01t0502700-00(-),Os01t0642900-01(SSB),Os01t0869300-01(-),Os01t0911000-01(-),Os02t0102900-01(OsCPn60beta2),Os02t0119400-01(-),Os02t0123200-01(-),Os02t0612700-01(-),Os02t0739000-01(-),Os02t0763200-01(-),Os02t0763800-01(-),Os02t0763900-01(-),Os03t0116000-00(-),Os03t0279200-01(-),Os03t0…
GO:0008150	Biological Process	GO:0051704	multi-organism process	13	Os01t0889900-01(-),Os02t0603800-01(OsHDS),Os03t0760200-01(bel),Os04t0103500-01(YK28),Os04t0109400-00(-),Os04t0288500-01(-),Os04t0618700-01(Os-FLS2),Os05t0368100-00(-),Os06t0498400-01(-),Os07t0130200-01(-),Os07t0550900-01(-),Os07t0575700-01(SIT3),Os12t0606000-00(-)
GO:0008150	Biological Process	GO:0002376	immune system process	2	Os02t0603800-01(OsHDS),Os05t0368100-00(-)
GO:0008150	Biological Process	GO:0048519	negative regulation of biological process	17	Os01t0106700-00(-),Os01t0124200-02(RBBI3-1),Os02t0739000-01(-),Os03t0279200-01(-),Os03t0747600-02(-),Os03t0853700-01(-),Os04t0582900-01(-),Os05t0121600-01(RSR1),Os05t0390600-00(-),Os06t0300800-01(OsWD40-128),Os06t0643700-01(-),Os06t0725900-01(OsFtsH1),Os07t0138400-01(C3H47),Os07t0216700-01(-),Os09t0363600-01(OsWD40-171),Os09t0535300-01(-),Os12t0535900-01(-)
GO:0008150	Biological Process	GO:0009987	cellular process	414	Os01t0106700-00(-),Os01t0122701-00(-),Os01t0124200-02(RBBI3-1),Os01t0166800-01(-),Os01t0176900-00(-),Os01t0196300-01(DPF),Os01t0197450-00(-),Os01t0212500-01(OsSPEAR2),Os01t0218100-01(OsbHLH037),Os01t0238500-01(-),Os01t0238500-02(-),Os01t0267600-01(-),Os01t0289600-00(OsWRKY9),Os01t0292200-01(OsCIPK01),Os01t0300200-01(-),Os01t0300200-02(-),Os01t0306400-01(OsDOG1L-1),Os01t0363300-01(-),Os01t0363300-…
GO:0003674	Molecular Function	GO:0140110	transcription regulator activity	49	Os01t0176900-00(-),Os01t0212500-01(OsSPEAR2),Os01t0289600-00(OsWRKY9),Os01t0571300-01(OsHsfA7),Os01t0572300-01(OsIDD11),Os01t0625300-01(HSFC1A),Os01t0626400-01(WRKY11),Os01t0626400-02(WRKY11),Os01t0693400-01(AP2/EREBP#127),Os01t0733200-01(OsHsfC1b),Os01t0812000-01(GAMYB),Os01t0812000-02(GAMYB),Os01t0935000-01(OsIDD9),Os02t0202000-01(ERF3),Os02t0232000-01(HSFC2A),Os03t0174400-00(OsERF#041),Os03t01…
GO:0003674	Molecular Function	GO:0005215	transporter activity	71	Os01t0172100-01(OsPPT3),Os01t0202800-00(OsNIP1),Os01t0207900-00(OsUMAMIT3),Os01t0232100-01(OsTIP4),Os01t0504100-01(OsPUP8),Os01t0684900-01(-),Os01t0871500-01(-),Os02t0190000-00(-),Os02t0211000-00(OsABCA1),Os02t0301100-01(OsSWEET4),Os02t0670900-02(OsANT3),Os02t0689900-01(OsNRT1.5A),Os02t0821600-00(-),Os03t0116000-00(-),Os03t0187800-01(OsPUP1),Os03t0337500-00(OsHAK8),Os03t0374900-00(OsLAT2),Os03t03…
GO:0003674	Molecular Function	GO:0060089	molecular transducer activity	16	Os01t0367700-01(Orysa),Os01t0575400-00(-),Os02t0283800-01(TMS10),Os03t0227900-00(-),Os04t0109400-00(-),Os04t0288500-01(-),Os04t0430400-01(-),Os04t0509000-01(-),Os05t0387700-01(OsRLCK186),Os05t0387700-02(OsRLCK186),Os06t0643700-01(-),Os07t0130200-01(-),Os07t0575700-01(SIT3),Os07t0596600-02(Orysa),Os08t0376600-01(-),Os12t0606000-00(-)
GO:0003674	Molecular Function	GO:0140104	molecular carrier activity	3	Os05t0353400-01(OsImpbeta1),Os07t0613300-01(-),Os07t0613300-02(-)
GO:0003674	Molecular Function	GO:0003824	catalytic activity	393	Os01t0106700-00(-),Os01t0126900-01(OsLPR4),Os01t0127000-01(OsLPR3),Os01t0196600-01(-),Os01t0199400-01(-),Os01t0211000-00(-),Os01t0227800-01(-),Os01t0238500-01(-),Os01t0238500-02(-),Os01t0268600-01(-),Os01t0292200-01(OsCIPK01),Os01t0300200-01(-),Os01t0300200-02(-),Os01t0300200-03(-),Os01t0316100-00(-),Os01t0367700-01(Orysa),Os01t0533400-01(OsBgal5),Os01t0575400-00(-),Os01t0591300-01(OsALDH2C1),Os0…
GO:0003674	Molecular Function	GO:0031386	protein tag	1	Os03t0808400-00(-)
GO:0003674	Molecular Function	GO:0016209	antioxidant activity	7	Os02t0741200-01(prx31),Os04t0473900-01(DWA1),Os06t0547100-00(prx87),Os06t0681600-01(prx89),Os06t0681600-02(prx89),Os08t0113000-01(prx117),Os12t0178100-01(OsAPx6)
GO:0003674	Molecular Function	GO:0045735	nutrient reservoir activity	2	Os05t0277500-01(OsGLP5-2),Os07t0216700-01(-)
GO:0003674	Molecular Function	GO:0005488	binding	467	Os01t0106700-00(-),Os01t0126900-01(OsLPR4),Os01t0127000-01(OsLPR3),Os01t0139200-01(-),Os01t0139200-02(-),Os01t0149350-00(-),Os01t0149500-01(PIT),Os01t0166800-01(-),Os01t0170800-01(-),Os01t0196300-01(DPF),Os01t0197450-00(-),Os01t0211000-00(-),Os01t0218100-01(OsbHLH037),Os01t0222700-01(-),Os01t0222700-02(-),Os01t0227800-01(-),Os01t0238500-01(-),Os01t0238500-02(-),Os01t0267600-01(-),Os01t0268600-01(…
GO:0003674	Molecular Function	GO:0098772	molecular function regulator	7	Os01t0124200-02(RBBI3-1),Os01t0849100-01(OsRacGEF1),Os04t0563700-01(cycB2),Os05t0390600-00(-),Os07t0216700-01(-),Os08t0220400-01(OsPME24),Os09t0542700-00(-)
GO:0003674	Molecular Function	GO:0005198	structural molecule activity	6	Os02t0205000-01(-),Os03t0576700-01(RPL13b),Os06t0683200-01(-),Os06t0701400-01(-),Os07t0685400-01(-),Os09t0501200-01(rpL32_9.1)
GO:0005575	Cellular Component	GO:0044464	cell part	453	Os01t0106700-00(-),Os01t0122701-00(-),Os01t0127000-01(OsLPR3),Os01t0166800-01(-),Os01t0170800-01(-),Os01t0172100-01(OsPPT3),Os01t0176800-01(-),Os01t0182832-00(-),Os01t0196300-01(DPF),Os01t0196600-01(-),Os01t0197450-00(-),Os01t0199400-01(-),Os01t0207900-00(OsUMAMIT3),Os01t0218100-01(OsbHLH037),Os01t0232100-01(OsTIP4),Os01t0238500-01(-),Os01t0238500-02(-),Os01t0238700-01(OsYSL1),Os01t0267600-01(-),…
GO:0005575	Cellular Component	GO:0044425	membrane part	260	Os01t0127000-01(OsLPR3),Os01t0172100-01(OsPPT3),Os01t0176800-01(-),Os01t0196600-01(-),Os01t0199400-01(-),Os01t0199400-02(-),Os01t0202800-00(OsNIP1),Os01t0207900-00(OsUMAMIT3),Os01t0227800-01(-),Os01t0232100-01(OsTIP4),Os01t0238700-01(OsYSL1),Os01t0346600-01(-),Os01t0363300-01(-),Os01t0363300-02(-),Os01t0368700-01(-),Os01t0504100-01(OsPUP8),Os01t0555300-01(-),Os01t0557550-00(-),Os01t0684900-01(-),…
GO:0005575	Cellular Component	GO:0055044	symplast	14	Os02t0719700-01(OsBAG6),Os03t0751100-01(OPT),Os03t0791700-01(-),Os05t0277500-01(OsGLP5-2),Os05t0317900-01(OsCrRLK1L2),Os05t0367900-01(-),Os06t0133600-01(-),Os06t0133600-02(-),Os06t0334300-01(OsCrRLK1L14),Os06t0681600-01(prx89),Os07t0134700-00(-),Os07t0166700-01(-),Os08t0113000-01(prx117),Os12t0159000-01(-)
GO:0005575	Cellular Component	GO:0030054	cell junction	14	Os02t0719700-01(OsBAG6),Os03t0751100-01(OPT),Os03t0791700-01(-),Os05t0277500-01(OsGLP5-2),Os05t0317900-01(OsCrRLK1L2),Os05t0367900-01(-),Os06t0133600-01(-),Os06t0133600-02(-),Os06t0334300-01(OsCrRLK1L14),Os06t0681600-01(prx89),Os07t0134700-00(-),Os07t0166700-01(-),Os08t0113000-01(prx117),Os12t0159000-01(-)
GO:0005575	Cellular Component	GO:0005623	cell	454	Os01t0106700-00(-),Os01t0122701-00(-),Os01t0127000-01(OsLPR3),Os01t0166800-01(-),Os01t0170800-01(-),Os01t0172100-01(OsPPT3),Os01t0176800-01(-),Os01t0182832-00(-),Os01t0196300-01(DPF),Os01t0196600-01(-),Os01t0197450-00(-),Os01t0199400-01(-),Os01t0207900-00(OsUMAMIT3),Os01t0218100-01(OsbHLH037),Os01t0232100-01(OsTIP4),Os01t0238500-01(-),Os01t0238500-02(-),Os01t0238700-01(OsYSL1),Os01t0267600-01(-),…
GO:0005575	Cellular Component	GO:0009295	nucleoid	3	Os01t0642900-01(SSB),Os04t0459800-01(-),Os05t0509700-01(SSB)
GO:0005575	Cellular Component	GO:0016020	membrane	291	Os01t0127000-01(OsLPR3),Os01t0172100-01(OsPPT3),Os01t0176800-01(-),Os01t0196600-01(-),Os01t0199400-01(-),Os01t0199400-02(-),Os01t0202800-00(OsNIP1),Os01t0207900-00(OsUMAMIT3),Os01t0227800-01(-),Os01t0232100-01(OsTIP4),Os01t0238700-01(OsYSL1),Os01t0346600-01(-),Os01t0347100-01(-),Os01t0363300-01(-),Os01t0363300-02(-),Os01t0368700-01(-),Os01t0504100-01(OsPUP8),Os01t0555300-01(-),Os01t0557550-00(-),…
GO:0005575	Cellular Component	GO:0043226	organelle	305	Os01t0106700-00(-),Os01t0122701-00(-),Os01t0127000-01(OsLPR3),Os01t0166800-01(-),Os01t0170800-01(-),Os01t0172100-01(OsPPT3),Os01t0176800-01(-),Os01t0196300-01(DPF),Os01t0196600-01(-),Os01t0197450-00(-),Os01t0199400-01(-),Os01t0218100-01(OsbHLH037),Os01t0232100-01(OsTIP4),Os01t0267600-01(-),Os01t0289600-00(OsWRKY9),Os01t0292200-01(OsCIPK01),Os01t0367700-01(Orysa),Os01t0495900-01(-),Os01t0502700-00…
GO:0005575	Cellular Component	GO:0099080	supramolecular complex	3	Os07t0115600-00(-),Os10t0512800-01(OsRFPHC-10),Os12t0577000-00(-)
GO:0005575	Cellular Component	GO:0005576	extracellular region	19	Os01t0124200-02(RBBI3-1),Os01t0533400-01(OsBgal5),Os01t0679550-00(-),Os03t0261100-01(PLA2-II),Os04t0165000-01(-),Os05t0129200-00(OsGH9B12),Os05t0277500-01(OsGLP5-2),Os06t0547100-00(prx87),Os06t0573600-01(OsBgal2),Os06t0681600-01(prx89),Os07t0216700-01(-),Os07t0245200-01(OsPGL27),Os07t0404300-01(-),Os08t0113000-01(prx117),Os08t0220400-01(OsPME24),Os09t0365900-01(OsORAP1),Os09t0452800-01(-),Os09t05…
GO:0005575	Cellular Component	GO:0031974	membrane-enclosed lumen	23	Os01t0166800-01(-),Os01t0367700-01(Orysa),Os01t0502700-00(-),Os01t0642900-01(SSB),Os01t0683400-01(OsORC4),Os01t0706900-01(-),Os01t0911000-01(-),Os03t0279200-01(-),Os03t0646800-01(-),Os03t0797700-01(-),Os03t0797700-02(-),Os03t0800800-01(-),Os04t0177600-01(-),Os04t0177600-02(-),Os04t0459800-01(-),Os05t0353400-01(OsImpbeta1),Os05t0509700-01(SSB),Os07t0596600-02(Orysa),Os07t0613300-01(-),Os07t0613300…
GO:0005575	Cellular Component	GO:0044422	organelle part	91	Os01t0127000-01(OsLPR3),Os01t0166800-01(-),Os01t0172100-01(OsPPT3),Os01t0232100-01(OsTIP4),Os01t0267600-01(-),Os01t0367700-01(Orysa),Os01t0495900-01(-),Os01t0502700-00(-),Os01t0622300-01(HEME),Os01t0642900-01(SSB),Os01t0683400-01(OsORC4),Os01t0706900-01(-),Os01t0730900-01(-),Os01t0869300-01(-),Os01t0896500-01(OsStr10),Os01t0911000-01(-),Os01t0928800-01(OsLCB2a1),Os01t0965600-01(-),Os01t0976600-01…
GO:0005575	Cellular Component	GO:0032991	protein-containing complex	66	Os01t0166800-01(-),Os01t0367700-01(Orysa),Os01t0502700-00(-),Os01t0683400-01(OsORC4),Os01t0730900-01(-),Os01t0786800-01(-),Os01t0911000-01(-),Os01t0965600-01(-),Os01t0974701-01(-),Os02t0103800-01(OsLFNR1),Os02t0103800-03(OsLFNR1),Os02t0119400-01(-),Os02t0130900-01(-),Os02t0131700-00(-),Os02t0139600-01(-),Os02t0205000-01(-),Os02t0739000-01(-),Os03t0279200-01(-),Os03t0344900-00(OsClp5),Os03t0576700…

## Sheet:  ZJ22a-vs-ZJ22b
All enrichment GO terms of target of miRNAs between ZJ22a and ZJ22b in the comparison.
GO ID (level1)	GO Term (level1)	GO ID (level2)	GO Term (level2)	number_of_ZJ22a-vs-ZJ22b (All)	Genes_of_ZJ22a-vs-ZJ22b
GO:0008150	Biological Process	GO:0050896	response to stimulus	172	Os01t0106700-00(-),Os01t0132766-01(-),Os01t0166800-01(-),Os01t0176900-00(-),Os01t0204000-01(-),Os01t0308300-00(-),Os01t0566100-01(OsELF3.2),Os01t0566100-02(OsELF3.2),Os01t0571300-01(OsHsfA7),Os01t0622300-01(HEME),Os01t0625300-01(HSFC1A),Os01t0683400-01(OsORC4),Os01t0684900-01(-),Os01t0730900-01(-),Os01t0733200-01(OsHsfC1b),Os01t0801000-01(-),Os01t0869300-01(-),Os01t0896300-00(FSM),Os01t0927600-01…
GO:0008150	Biological Process	GO:0051179	localization	145	Os01t0172100-01(OsPPT3),Os01t0202800-00(OsNIP1),Os01t0207900-00(OsUMAMIT3),Os01t0232100-01(OsTIP4),Os01t0238700-01(OsYSL1),Os01t0279400-01(OsZIFL2),Os01t0355500-02(OsDjC5),Os01t0504100-01(OsPUP8),Os01t0514300-01(-),Os01t0516900-00(OsABCG33),Os01t0684900-01(-),Os01t0759100-01(OsTLP12),Os01t0827300-01(OsChI1),Os01t0836600-01(OsABCG3),Os01t0842400-01(Oslacc),Os01t0842500-01(OsLAC5),Os01t0850550-00(O…
GO:0008150	Biological Process	GO:0065007	biological regulation	237	Os01t0106700-00(-),Os01t0124200-02(RBBI3-1),Os01t0132766-01(-),Os01t0176900-00(-),Os01t0196300-01(DPF),Os01t0218100-01(OsbHLH037),Os01t0242500-01(-),Os01t0289600-00(OsWRKY9),Os01t0328700-01(-),Os01t0367300-01(-),Os01t0367700-01(Orysa),Os01t0393100-01(ONAC026),Os01t0566100-01(OsELF3.2),Os01t0566100-02(OsELF3.2),Os01t0571300-01(OsHsfA7),Os01t0572300-01(OsIDD11),Os01t0575400-00(-),Os01t0625300-01(HS…
GO:0008150	Biological Process	GO:0048511	rhythmic process	3	Os06t0694000-01(OsZTL2),Os07t0571100-01(-),Os09t0535300-01(-)
GO:0008150	Biological Process	GO:0071840	cellular component organization or biogenesis	118	Os01t0106700-00(-),Os01t0166800-01(-),Os01t0267600-01(-),Os01t0355500-02(OsDjC5),Os01t0363300-01(-),Os01t0363300-02(-),Os01t0368700-01(-),Os01t0502700-00(-),Os01t0642900-01(SSB),Os01t0869300-01(-),Os01t0896300-00(FSM),Os01t0911000-01(-),Os02t0102900-01(OsCPn60beta2),Os02t0111900-01(-),Os02t0119400-01(-),Os02t0123200-01(-),Os02t0139200-01(OsPRMT5),Os02t0329800-01(XAX1),Os02t0557000-01(-),Os02t0588…
GO:0008150	Biological Process	GO:0008283	cell proliferation	3	Os04t0486800-01(OsDBH),Os04t0563700-01(cycB2),Os06t0665400-01(APO1)
GO:0008150	Biological Process	GO:0032501	multicellular organismal process	46	Os01t0122701-00(-),Os01t0566100-01(OsELF3.2),Os01t0566100-02(OsELF3.2),Os01t0889900-01(-),Os01t0896300-00(FSM),Os02t0139200-01(OsPRMT5),Os02t0707200-00(OsDof7),Os02t0739000-01(-),Os03t0203200-01(D14),Os03t0366100-01(OsCLE303),Os03t0588600-01(-),Os03t0637800-01(OsCR4),Os03t0670200-01(-),Os03t0699000-01(OLE18),Os03t0751100-01(OPT),Os04t0103500-01(YK28),Os04t0206300-00(-),Os04t0483500-01(KCR1),Os04t…
GO:0008150	Biological Process	GO:0050789	regulation of biological process	193	Os01t0106700-00(-),Os01t0124200-02(RBBI3-1),Os01t0132766-01(-),Os01t0176900-00(-),Os01t0196300-01(DPF),Os01t0218100-01(OsbHLH037),Os01t0289600-00(OsWRKY9),Os01t0328700-01(-),Os01t0367300-01(-),Os01t0367700-01(Orysa),Os01t0393100-01(ONAC026),Os01t0566100-01(OsELF3.2),Os01t0566100-02(OsELF3.2),Os01t0571300-01(OsHsfA7),Os01t0572300-01(OsIDD11),Os01t0575400-00(-),Os01t0625300-01(HSFC1A),Os01t0626400-…
GO:0008150	Biological Process	GO:0023052	signaling	56	Os01t0106700-00(-),Os01t0132766-01(-),Os01t0176900-00(-),Os01t0927600-01(OsARF4),Os02t0178000-01(SnRK1),Os02t0283800-01(TMS10),Os02t0532800-00(-),Os02t0603800-01(OsHDS),Os02t0807200-00(OsWAK18),Os02t0811200-00(OsWAK24),Os03t0633500-01(IAA11),Os03t0769500-01(-),Os03t0773300-01(-),Os03t0810600-01(-),Os04t0213800-00(OsRLCK137),Os04t0288500-01(-),Os04t0370900-01(-),Os04t0430400-01(-),Os04t0437600-01(…
GO:0008150	Biological Process	GO:0032502	developmental process	51	Os01t0122701-00(-),Os01t0132766-01(-),Os01t0566100-01(OsELF3.2),Os01t0566100-02(OsELF3.2),Os01t0896300-00(FSM),Os02t0139200-01(OsPRMT5),Os02t0557000-01(-),Os02t0707200-00(OsDof7),Os02t0739000-01(-),Os03t0203200-01(D14),Os03t0366100-01(OsCLE303),Os03t0381200-01(-),Os03t0381200-02(-),Os03t0588600-01(-),Os03t0637800-01(OsCR4),Os03t0670200-01(-),Os03t0699000-01(OLE18),Os04t0206300-00(-),Os04t0483500-…
GO:0008150	Biological Process	GO:0008152	metabolic process	587	Os01t0106700-00(-),Os01t0111100-01(OsCYP26-2),Os01t0122701-00(-),Os01t0124200-02(RBBI3-1),Os01t0126900-01(OsLPR4),Os01t0127000-01(OsLPR3),Os01t0132766-01(-),Os01t0151400-01(-),Os01t0151500-00(-),Os01t0166800-01(-),Os01t0176900-00(-),Os01t0196300-01(DPF),Os01t0204000-01(-),Os01t0204000-02(-),Os01t0218100-01(OsbHLH037),Os01t0227800-01(-),Os01t0238500-01(-),Os01t0238500-02(-),Os01t0239700-01(-),Os01…
GO:0008150	Biological Process	GO:0048518	positive regulation of biological process	33	Os01t0367700-01(Orysa),Os01t0571300-01(OsHsfA7),Os01t0625300-01(HSFC1A),Os01t0733200-01(OsHsfC1b),Os02t0139200-01(OsPRMT5),Os02t0232000-01(HSFC2A),Os02t0579600-00(OsMADS27),Os02t0671300-01(OsbHLH076),Os02t0707200-00(OsDof7),Os02t0731200-01(OsMADS57),Os03t0174400-00(OsERF#041),Os03t0625933-00(-),Os03t0626100-01(-),Os03t0747600-02(-),Os03t0800800-01(-),Os04t0437600-01(-),Os04t0459800-01(-),Os04t048…
GO:0008150	Biological Process	GO:0040007	growth	6	Os01t0896300-00(FSM),Os02t0731200-01(OsMADS57),Os04t0517600-00(-),Os05t0459700-01(OsFLA26),Os06t0203800-01(RLCK204),Os10t0577200-01(-)
GO:0008150	Biological Process	GO:0098754	detoxification	9	Os02t0741200-01(prx31),Os04t0473900-01(DWA1),Os05t0465800-01(rbohD),Os06t0547100-00(prx87),Os06t0681600-01(prx89),Os06t0681600-02(prx89),Os08t0113000-01(prx117),Os11t0210600-01(Adh3),Os12t0178100-01(OsAPx6)
GO:0008150	Biological Process	GO:0022414	reproductive process	25	Os01t0566100-01(OsELF3.2),Os01t0566100-02(OsELF3.2),Os01t0889900-01(-),Os02t0139200-01(OsPRMT5),Os02t0707200-00(OsDof7),Os02t0739000-01(-),Os03t0588600-01(-),Os03t0637800-01(OsCR4),Os03t0670200-01(-),Os03t0699000-01(OLE18),Os04t0103500-01(YK28),Os04t0483500-01(KCR1),Os04t0501700-01(-),Os04t0517600-00(-),Os05t0459700-01(OsFLA26),Os06t0665400-01(APO1),Os06t0678200-01(OsSPS1),Os07t0404300-01(-),Os07…
GO:0008150	Biological Process	GO:0000003	reproduction	25	Os01t0566100-01(OsELF3.2),Os01t0566100-02(OsELF3.2),Os01t0889900-01(-),Os02t0139200-01(OsPRMT5),Os02t0707200-00(OsDof7),Os02t0739000-01(-),Os03t0588600-01(-),Os03t0637800-01(OsCR4),Os03t0670200-01(-),Os03t0699000-01(OLE18),Os04t0103500-01(YK28),Os04t0483500-01(KCR1),Os04t0501700-01(-),Os04t0517600-00(-),Os05t0459700-01(OsFLA26),Os06t0665400-01(APO1),Os06t0678200-01(OsSPS1),Os07t0404300-01(-),Os07…
GO:0008150	Biological Process	GO:0002376	immune system process	2	Os02t0603800-01(OsHDS),Os05t0368100-00(-)
GO:0008150	Biological Process	GO:0009987	cellular process	561	Os01t0106700-00(-),Os01t0111100-01(OsCYP26-2),Os01t0122701-00(-),Os01t0124200-02(RBBI3-1),Os01t0132766-01(-),Os01t0151400-01(-),Os01t0151500-00(-),Os01t0166800-01(-),Os01t0176900-00(-),Os01t0196300-01(DPF),Os01t0204000-01(-),Os01t0204000-02(-),Os01t0218100-01(OsbHLH037),Os01t0238500-01(-),Os01t0238500-02(-),Os01t0239700-01(-),Os01t0239700-02(-),Os01t0239700-03(-),Os01t0242500-01(-),Os01t0267600-0…
GO:0008150	Biological Process	GO:0051704	multi-organism process	12	Os01t0889900-01(-),Os02t0603800-01(OsHDS),Os03t0760200-01(bel),Os04t0103500-01(YK28),Os04t0109400-00(-),Os04t0288500-01(-),Os04t0618700-01(Os-FLS2),Os05t0368100-00(-),Os06t0498400-01(-),Os07t0575700-01(SIT3),Os09t0516900-01(-),Os12t0606000-00(-)
GO:0008150	Biological Process	GO:0048519	negative regulation of biological process	18	Os01t0106700-00(-),Os01t0124200-02(RBBI3-1),Os02t0510300-01(-),Os02t0739000-01(-),Os03t0279200-01(-),Os03t0381200-01(-),Os03t0381200-02(-),Os03t0747600-02(-),Os03t0853700-01(-),Os04t0582900-01(-),Os05t0390600-00(-),Os06t0300800-01(OsWD40-128),Os06t0643700-01(-),Os06t0725900-01(OsFtsH1),Os07t0216700-01(-),Os09t0363600-01(OsWD40-171),Os09t0535300-01(-),Os12t0535900-01(-)
GO:0003674	Molecular Function	GO:0003824	catalytic activity	528	Os01t0105900-01(-),Os01t0106700-00(-),Os01t0111100-01(OsCYP26-2),Os01t0126900-01(OsLPR4),Os01t0127000-01(OsLPR3),Os01t0151400-01(-),Os01t0151500-00(-),Os01t0196600-01(-),Os01t0199400-01(-),Os01t0204000-01(-),Os01t0204000-02(-),Os01t0217000-01(OsTBL19),Os01t0227800-01(-),Os01t0238500-01(-),Os01t0238500-02(-),Os01t0239700-01(-),Os01t0239700-02(-),Os01t0239700-03(-),Os01t0242500-01(-),Os01t0268600-0…
GO:0003674	Molecular Function	GO:0005215	transporter activity	81	Os01t0172100-01(OsPPT3),Os01t0202800-00(OsNIP1),Os01t0207900-00(OsUMAMIT3),Os01t0232100-01(OsTIP4),Os01t0504100-01(OsPUP8),Os01t0516900-00(OsABCG33),Os01t0684900-01(-),Os01t0836600-01(OsABCG3),Os01t0871500-01(-),Os02t0190000-00(-),Os02t0211000-00(OsABCA1),Os02t0301100-01(OsSWEET4),Os02t0670900-02(OsANT3),Os02t0689900-01(OsNRT1.5A),Os02t0730300-01(OsHAK25),Os02t0821600-00(-),Os03t0116000-00(-),Os0…
GO:0003674	Molecular Function	GO:0060089	molecular transducer activity	21	Os01t0367700-01(Orysa),Os01t0575400-00(-),Os02t0283800-01(TMS10),Os03t0773300-01(-),Os04t0109400-00(-),Os04t0213800-00(OsRLCK137),Os04t0288500-01(-),Os04t0430400-01(-),Os04t0488000-01(CDKG),Os04t0488000-02(CDKG),Os04t0509000-01(-),Os05t0125300-00(OsRLCK177),Os05t0387700-01(OsRLCK186),Os05t0387700-02(OsRLCK186),Os06t0643700-01(-),Os06t0694000-01(OsZTL2),Os07t0103100-01(OsGLR3.6),Os07t0575700-01(SI…
GO:0003674	Molecular Function	GO:0140104	molecular carrier activity	3	Os05t0353400-01(OsImpbeta1),Os07t0613300-01(-),Os07t0613300-02(-)
GO:0003674	Molecular Function	GO:0140110	transcription regulator activity	46	Os01t0132766-01(-),Os01t0176900-00(-),Os01t0289600-00(OsWRKY9),Os01t0571300-01(OsHsfA7),Os01t0572300-01(OsIDD11),Os01t0625300-01(HSFC1A),Os01t0626400-01(WRKY11),Os01t0626400-02(WRKY11),Os01t0643600-00(Oshox3),Os01t0693400-01(AP2/EREBP#127),Os01t0733200-01(OsHsfC1b),Os01t0935000-01(OsIDD9),Os02t0202000-01(ERF3),Os02t0232000-01(HSFC2A),Os02t0579600-00(OsMADS27),Os02t0662700-01(OsHAM1),Os02t0663100-…
GO:0003674	Molecular Function	GO:0005488	binding	624	Os01t0106700-00(-),Os01t0126900-01(OsLPR4),Os01t0127000-01(OsLPR3),Os01t0132766-01(-),Os01t0139200-01(-),Os01t0139200-02(-),Os01t0166800-01(-),Os01t0170800-01(-),Os01t0196300-01(DPF),Os01t0218100-01(OsbHLH037),Os01t0227800-01(-),Os01t0238500-01(-),Os01t0238500-02(-),Os01t0239700-01(-),Os01t0239700-02(-),Os01t0239700-03(-),Os01t0242500-01(-),Os01t0267600-01(-),Os01t0268600-01(-),Os01t0276100-01(Os…
GO:0003674	Molecular Function	GO:0031386	protein tag	1	Os03t0808400-00(-)
GO:0003674	Molecular Function	GO:0045735	nutrient reservoir activity	3	Os03t0197300-01(-),Os05t0277500-01(OsGLP5-2),Os07t0216700-01(-)
GO:0003674	Molecular Function	GO:0016209	antioxidant activity	8	Os02t0741200-01(prx31),Os04t0473900-01(DWA1),Os05t0465800-01(rbohD),Os06t0547100-00(prx87),Os06t0681600-01(prx89),Os06t0681600-02(prx89),Os08t0113000-01(prx117),Os12t0178100-01(OsAPx6)
GO:0003674	Molecular Function	GO:0098772	molecular function regulator	11	Os01t0124200-02(RBBI3-1),Os01t0849100-01(OsRacGEF1),Os03t0283800-01(-),Os04t0563700-01(cycB2),Os05t0390600-00(-),Os05t0454200-01(BGL),Os06t0301300-00(-),Os06t0338900-01(-),Os07t0216700-01(-),Os08t0220400-01(OsPME24),Os09t0542700-00(-)
GO:0003674	Molecular Function	GO:0005198	structural molecule activity	12	Os02t0205000-01(-),Os03t0169400-01(-),Os03t0576700-01(RPL13b),Os04t0501700-01(-),Os06t0683200-01(-),Os06t0701400-01(-),Os07t0685400-01(-),Os09t0439050-00(-),Os09t0501200-01(rpL32_9.1),Os11t0104866-00(-),Os11t0550800-01(-),Os12t0104766-00(-)
GO:0005575	Cellular Component	GO:0009295	nucleoid	6	Os01t0642900-01(SSB),Os04t0459800-01(-),Os05t0393400-01(-),Os05t0393400-02(-),Os05t0393400-03(-),Os05t0509700-01(SSB)
GO:0005575	Cellular Component	GO:0055044	symplast	19	Os02t0100600-01(-),Os02t0719700-01(OsBAG6),Os03t0124200-01(OsCrRLK1L6),Os03t0751100-01(OPT),Os03t0791700-01(-),Os05t0277500-01(OsGLP5-2),Os05t0317900-01(OsCrRLK1L2),Os05t0367900-01(-),Os06t0133600-01(-),Os06t0133600-02(-),Os06t0334300-01(OsCrRLK1L14),Os06t0681600-01(prx89),Os07t0134700-00(-),Os07t0166700-01(-),Os08t0113000-01(prx117),Os11t0104866-00(-),Os12t0104766-00(-),Os12t0158900-00(-),Os12t0…
GO:0005575	Cellular Component	GO:0030054	cell junction	19	Os02t0100600-01(-),Os02t0719700-01(OsBAG6),Os03t0124200-01(OsCrRLK1L6),Os03t0751100-01(OPT),Os03t0791700-01(-),Os05t0277500-01(OsGLP5-2),Os05t0317900-01(OsCrRLK1L2),Os05t0367900-01(-),Os06t0133600-01(-),Os06t0133600-02(-),Os06t0334300-01(OsCrRLK1L14),Os06t0681600-01(prx89),Os07t0134700-00(-),Os07t0166700-01(-),Os08t0113000-01(prx117),Os11t0104866-00(-),Os12t0104766-00(-),Os12t0158900-00(-),Os12t0…
GO:0005575	Cellular Component	GO:0005623	cell	608	Os01t0106700-00(-),Os01t0111100-01(OsCYP26-2),Os01t0122701-00(-),Os01t0127000-01(OsLPR3),Os01t0132766-01(-),Os01t0151400-01(-),Os01t0151500-00(-),Os01t0166800-01(-),Os01t0170800-01(-),Os01t0172100-01(OsPPT3),Os01t0176800-01(-),Os01t0182832-00(-),Os01t0196300-01(DPF),Os01t0196600-01(-),Os01t0199400-01(-),Os01t0204000-01(-),Os01t0204000-02(-),Os01t0207900-00(OsUMAMIT3),Os01t0217000-01(OsTBL19),Os01…
GO:0005575	Cellular Component	GO:0044464	cell part	601	Os01t0106700-00(-),Os01t0111100-01(OsCYP26-2),Os01t0122701-00(-),Os01t0127000-01(OsLPR3),Os01t0132766-01(-),Os01t0151400-01(-),Os01t0151500-00(-),Os01t0166800-01(-),Os01t0170800-01(-),Os01t0172100-01(OsPPT3),Os01t0176800-01(-),Os01t0182832-00(-),Os01t0196300-01(DPF),Os01t0196600-01(-),Os01t0199400-01(-),Os01t0204000-01(-),Os01t0204000-02(-),Os01t0207900-00(OsUMAMIT3),Os01t0217000-01(OsTBL19),Os01…
GO:0005575	Cellular Component	GO:0005576	extracellular region	42	Os01t0124200-02(RBBI3-1),Os01t0533400-01(OsBgal5),Os01t0634500-00(OsLAC2),Os01t0679550-00(-),Os01t0827300-01(OsChI1),Os01t0842400-01(Oslacc),Os01t0842500-01(OsLAC5),Os01t0850550-00(OsLAC7),Os01t0850700-02(OsLAC8),Os01t0850800-00(OsLAC9),Os02t0733300-01(OsGH9B1),Os02t0749700-01(OsLAC10),Os03t0261100-01(PLA2-II),Os03t0273200-01(Lac),Os03t0273200-02(Lac),Os04t0165000-01(-),Os04t0206300-00(-),Os05t01…
GO:0005575	Cellular Component	GO:0099080	supramolecular complex	8	Os01t0744000-01(-),Os02t0588300-01(-),Os03t0381200-01(-),Os03t0381200-02(-),Os04t0501700-01(-),Os07t0115600-00(-),Os10t0512800-01(OsRFPHC-10),Os12t0577000-00(-)
GO:0005575	Cellular Component	GO:0044425	membrane part	338	Os01t0127000-01(OsLPR3),Os01t0151500-00(-),Os01t0172100-01(OsPPT3),Os01t0176800-01(-),Os01t0196600-01(-),Os01t0199400-01(-),Os01t0199400-02(-),Os01t0202800-00(OsNIP1),Os01t0207900-00(OsUMAMIT3),Os01t0227800-01(-),Os01t0232100-01(OsTIP4),Os01t0238700-01(OsYSL1),Os01t0239700-01(-),Os01t0239700-02(-),Os01t0279400-01(OsZIFL2),Os01t0346600-01(-),Os01t0363300-01(-),Os01t0363300-02(-),Os01t0368700-01(-)…
GO:0005575	Cellular Component	GO:0016020	membrane	392	Os01t0127000-01(OsLPR3),Os01t0151400-01(-),Os01t0151500-00(-),Os01t0172100-01(OsPPT3),Os01t0176800-01(-),Os01t0196600-01(-),Os01t0199400-01(-),Os01t0199400-02(-),Os01t0202800-00(OsNIP1),Os01t0207900-00(OsUMAMIT3),Os01t0227800-01(-),Os01t0232100-01(OsTIP4),Os01t0238700-01(OsYSL1),Os01t0239700-01(-),Os01t0239700-02(-),Os01t0279400-01(OsZIFL2),Os01t0346600-01(-),Os01t0347100-01(-),Os01t0363300-01(-)…
GO:0005575	Cellular Component	GO:0031974	membrane-enclosed lumen	37	Os01t0166800-01(-),Os01t0204000-01(-),Os01t0204000-02(-),Os01t0367700-01(Orysa),Os01t0502700-00(-),Os01t0642900-01(SSB),Os01t0683400-01(OsORC4),Os01t0706900-01(-),Os01t0911000-01(-),Os03t0279200-01(-),Os03t0646800-01(-),Os03t0728800-01(OsRH16),Os03t0735100-01(OsWD40-87),Os03t0797700-01(-),Os03t0797700-02(-),Os03t0800800-01(-),Os03t0845700-01(-),Os04t0177600-01(-),Os04t0177600-02(-),Os04t0459800-0…
GO:0005575	Cellular Component	GO:0043226	organelle	395	Os01t0106700-00(-),Os01t0111100-01(OsCYP26-2),Os01t0122701-00(-),Os01t0127000-01(OsLPR3),Os01t0132766-01(-),Os01t0166800-01(-),Os01t0170800-01(-),Os01t0172100-01(OsPPT3),Os01t0176800-01(-),Os01t0196300-01(DPF),Os01t0196600-01(-),Os01t0199400-01(-),Os01t0204000-01(-),Os01t0204000-02(-),Os01t0217000-01(OsTBL19),Os01t0218100-01(OsbHLH037),Os01t0232100-01(OsTIP4),Os01t0238800-01(-),Os01t0267600-01(-)…
GO:0005575	Cellular Component	GO:0044421	extracellular region part	2	Os04t0206300-00(-),Os07t0590500-00(-)
GO:0005575	Cellular Component	GO:0044422	organelle part	137	Os01t0127000-01(OsLPR3),Os01t0166800-01(-),Os01t0172100-01(OsPPT3),Os01t0204000-01(-),Os01t0204000-02(-),Os01t0232100-01(OsTIP4),Os01t0267600-01(-),Os01t0367700-01(Orysa),Os01t0495900-01(-),Os01t0502700-00(-),Os01t0514300-01(-),Os01t0622300-01(HEME),Os01t0642900-01(SSB),Os01t0683400-01(OsORC4),Os01t0706900-01(-),Os01t0730900-01(-),Os01t0744000-01(-),Os01t0869300-01(-),Os01t0896500-01(OsStr10),Os0…
GO:0005575	Cellular Component	GO:0032991	protein-containing complex	104	Os01t0166800-01(-),Os01t0204000-01(-),Os01t0204000-02(-),Os01t0367300-01(-),Os01t0367700-01(Orysa),Os01t0502700-00(-),Os01t0683400-01(OsORC4),Os01t0730900-01(-),Os01t0744000-01(-),Os01t0786800-01(-),Os01t0896300-00(FSM),Os01t0911000-01(-),Os01t0965600-01(-),Os01t0974701-01(-),Os02t0103800-01(OsLFNR1),Os02t0103800-03(OsLFNR1),Os02t0119400-01(-),Os02t0130900-01(-),Os02t0131700-00(-),Os02t0139600-01…

## Sheet:  ZJ22a-vs-ZJ22c
All enrichment GO terms of target of miRNAs between ZJ22a and ZJ22c in the comparison.
GO ID (level1)	GO Term (level1)	GO ID (level2)	GO Term (level2)	number_of_ZJ22a-vs-ZJ22c (All)	Genes_of_ZJ22a-vs-ZJ22c
GO:0008150	Biological Process	GO:0065007	biological regulation	298	Os01t0106700-00(-),Os01t0124200-02(RBBI3-1),Os01t0128000-01(-),Os01t0176900-00(-),Os01t0196300-01(DPF),Os01t0197100-01(D2),Os01t0197450-00(-),Os01t0212500-01(OsSPEAR2),Os01t0218100-01(OsbHLH037),Os01t0242500-01(-),Os01t0289600-00(OsWRKY9),Os01t0292200-01(OsCIPK01),Os01t0321300-00(-),Os01t0328700-01(-),Os01t0367300-01(-),Os01t0367700-01(Orysa),Os01t0385400-01(OsSLAC7),Os01t0385400-02(OsSLAC7),Os01…
GO:0008150	Biological Process	GO:0048511	rhythmic process	6	Os02t0625000-01(OSCRY2),Os03t0131200-01(CATC),Os03t0131200-02(CATC),Os06t0694000-01(OsZTL2),Os07t0571100-01(-),Os09t0535300-01(-)
GO:0008150	Biological Process	GO:0050896	response to stimulus	205	Os01t0106700-00(-),Os01t0149350-00(-),Os01t0149500-01(PIT),Os01t0166800-01(-),Os01t0176900-00(-),Os01t0197450-00(-),Os01t0204000-01(-),Os01t0205900-01(prx2),Os01t0205900-02(prx2),Os01t0292200-01(OsCIPK01),Os01t0308300-00(-),Os01t0321300-00(-),Os01t0566100-01(OsELF3.2),Os01t0566100-02(OsELF3.2),Os01t0571300-01(OsHsfA7),Os01t0622300-01(HEME),Os01t0625300-01(HSFC1A),Os01t0683400-01(OsORC4),Os01t0684…
GO:0008150	Biological Process	GO:0050789	regulation of biological process	251	Os01t0106700-00(-),Os01t0124200-02(RBBI3-1),Os01t0128000-01(-),Os01t0176900-00(-),Os01t0196300-01(DPF),Os01t0197450-00(-),Os01t0212500-01(OsSPEAR2),Os01t0218100-01(OsbHLH037),Os01t0289600-00(OsWRKY9),Os01t0292200-01(OsCIPK01),Os01t0321300-00(-),Os01t0328700-01(-),Os01t0367300-01(-),Os01t0367700-01(Orysa),Os01t0393100-01(ONAC026),Os01t0566100-01(OsELF3.2),Os01t0566100-02(OsELF3.2),Os01t0571300-01(…
GO:0008150	Biological Process	GO:0032502	developmental process	73	Os01t0122701-00(-),Os01t0123800-00(-),Os01t0197100-01(D2),Os01t0321300-00(-),Os01t0566100-01(OsELF3.2),Os01t0566100-02(OsELF3.2),Os01t0710200-01(PAO1),Os01t0761900-00(-),Os01t0812000-01(GAMYB),Os01t0812000-02(GAMYB),Os02t0139200-01(OsPRMT5),Os02t0557000-01(-),Os02t0625000-01(OSCRY2),Os02t0690500-01(OsPP2C26),Os02t0739000-01(-),Os02t0749800-01(-),Os03t0203200-01(D14),Os03t0210400-01(-),Os03t021830…
GO:0008150	Biological Process	GO:0032501	multicellular organismal process	65	Os01t0122701-00(-),Os01t0123800-00(-),Os01t0197100-01(D2),Os01t0566100-01(OsELF3.2),Os01t0566100-02(OsELF3.2),Os01t0761900-00(-),Os01t0812000-01(GAMYB),Os01t0812000-02(GAMYB),Os01t0889900-01(-),Os02t0139200-01(OsPRMT5),Os02t0625000-01(OSCRY2),Os02t0690500-01(OsPP2C26),Os02t0739000-01(-),Os03t0203200-01(D14),Os03t0218300-01(-),Os03t0366100-01(OsCLE303),Os03t0556600-01(-),Os03t0588600-01(-),Os03t06…
GO:0008150	Biological Process	GO:0008283	cell proliferation	6	Os04t0486800-01(OsDBH),Os04t0563700-01(cycB2),Os06t0665400-01(APO1),Os08t0421100-00(CycD1),Os11t0149400-01(OsPSK2),Os12t0147800-01(OsPSK3)
GO:0008150	Biological Process	GO:0051179	localization	163	Os01t0172100-01(OsPPT3),Os01t0202800-00(OsNIP1),Os01t0207900-00(OsUMAMIT3),Os01t0232100-01(OsTIP4),Os01t0238700-01(OsYSL1),Os01t0321300-00(-),Os01t0385400-01(OsSLAC7),Os01t0385400-02(OsSLAC7),Os01t0504100-01(OsPUP8),Os01t0516900-00(OsABCG33),Os01t0567500-01(OsMST8),Os01t0567600-00(OsMST7),Os01t0584200-00(-),Os01t0601000-00(OsEnS-10),Os01t0684900-01(-),Os01t0756700-01(KAT1),Os01t0759100-01(OsTLP12…
GO:0008150	Biological Process	GO:0022414	reproductive process	38	Os01t0566100-01(OsELF3.2),Os01t0566100-02(OsELF3.2),Os01t0812000-01(GAMYB),Os01t0812000-02(GAMYB),Os01t0889900-01(-),Os02t0139200-01(OsPRMT5),Os02t0625000-01(OSCRY2),Os02t0739000-01(-),Os03t0218300-01(-),Os03t0556600-01(-),Os03t0588600-01(-),Os03t0637800-01(OsCR4),Os03t0670200-01(-),Os03t0699000-01(OLE18),Os03t0818800-01(AP2/EREBP#033),Os03t0851800-01(PANC),Os04t0103500-01(YK28),Os04t0483500-01(K…
GO:0008150	Biological Process	GO:0000003	reproduction	38	Os01t0566100-01(OsELF3.2),Os01t0566100-02(OsELF3.2),Os01t0812000-01(GAMYB),Os01t0812000-02(GAMYB),Os01t0889900-01(-),Os02t0139200-01(OsPRMT5),Os02t0625000-01(OSCRY2),Os02t0739000-01(-),Os03t0218300-01(-),Os03t0556600-01(-),Os03t0588600-01(-),Os03t0637800-01(OsCR4),Os03t0670200-01(-),Os03t0699000-01(OLE18),Os03t0818800-01(AP2/EREBP#033),Os03t0851800-01(PANC),Os04t0103500-01(YK28),Os04t0483500-01(K…
GO:0008150	Biological Process	GO:0098754	detoxification	14	Os01t0205900-01(prx2),Os01t0205900-02(prx2),Os02t0741200-01(prx31),Os03t0131200-01(CATC),Os03t0131200-02(CATC),Os04t0473900-01(DWA1),Os04t0628200-01(prx56),Os06t0547100-00(prx87),Os06t0547400-01(prx86),Os06t0681600-01(prx89),Os06t0681600-02(prx89),Os08t0113000-01(prx117),Os11t0210600-01(Adh3),Os12t0178100-01(OsAPx6)
GO:0008150	Biological Process	GO:0008152	metabolic process	700	Os01t0106700-00(-),Os01t0111100-01(OsCYP26-2),Os01t0122701-00(-),Os01t0123800-00(-),Os01t0124200-02(RBBI3-1),Os01t0126900-01(OsLPR4),Os01t0127000-01(OsLPR3),Os01t0128000-01(-),Os01t0166800-01(-),Os01t0176900-00(-),Os01t0196300-01(DPF),Os01t0197100-01(D2),Os01t0197450-00(-),Os01t0204000-01(-),Os01t0204000-02(-),Os01t0205900-01(prx2),Os01t0205900-02(prx2),Os01t0212500-01(OsSPEAR2),Os01t0218100-01(O…
GO:0008150	Biological Process	GO:0071840	cellular component organization or biogenesis	138	Os01t0106700-00(-),Os01t0166800-01(-),Os01t0267600-01(-),Os01t0321300-00(-),Os01t0363300-01(-),Os01t0363300-02(-),Os01t0368700-01(-),Os01t0502700-00(-),Os01t0584200-00(-),Os01t0642900-01(SSB),Os01t0869300-01(-),Os01t0911000-01(-),Os02t0102900-01(OsCPn60beta2),Os02t0111900-01(-),Os02t0119400-01(-),Os02t0123200-01(-),Os02t0139200-01(OsPRMT5),Os02t0325100-01(OsRpt3),Os02t0329800-01(XAX1),Os02t055700…
GO:0008150	Biological Process	GO:0040007	growth	8	Os02t0625000-01(OSCRY2),Os02t0690500-01(OsPP2C26),Os04t0517600-00(-),Os04t0571200-01(OsRFPH2-14),Os05t0459700-01(OsFLA26),Os06t0203800-01(RLCK204),Os08t0108100-01(-),Os10t0577200-01(-)
GO:0008150	Biological Process	GO:0023052	signaling	65	Os01t0106700-00(-),Os01t0176900-00(-),Os01t0197450-00(-),Os01t0292200-01(OsCIPK01),Os01t0753500-01(OsARF3),Os01t0927600-01(OsARF4),Os02t0283800-01(TMS10),Os02t0532800-00(-),Os02t0603800-01(OsHDS),Os02t0625000-01(OSCRY2),Os02t0666300-01(YDA2),Os02t0807200-00(OsWAK18),Os02t0811200-00(OsWAK24),Os03t0633500-01(IAA11),Os03t0749800-02(-),Os03t0769500-01(-),Os03t0773300-01(-),Os03t0810600-01(-),Os04t028…
GO:0008150	Biological Process	GO:0040011	locomotion	1	Os10t0370800-01(-)
GO:0008150	Biological Process	GO:0002376	immune system process	4	Os02t0475300-01(-),Os02t0603800-01(OsHDS),Os02t0625000-01(OSCRY2),Os05t0368100-00(-)
GO:0008150	Biological Process	GO:0048518	positive regulation of biological process	35	Os01t0367700-01(Orysa),Os01t0571300-01(OsHsfA7),Os01t0625300-01(HSFC1A),Os01t0733200-01(OsHsfC1b),Os02t0139200-01(OsPRMT5),Os02t0232000-01(HSFC2A),Os02t0325100-01(OsRpt3),Os02t0325100-02(OsRpt3),Os02t0625000-01(OSCRY2),Os02t0666300-01(YDA2),Os02t0671300-01(OsbHLH076),Os03t0174400-00(OsERF#041),Os03t0625933-00(-),Os03t0626100-01(-),Os03t0747600-02(-),Os03t0800800-01(-),Os04t0437600-01(-),Os04t0459…
GO:0008150	Biological Process	GO:0048519	negative regulation of biological process	30	Os01t0106700-00(-),Os01t0124200-02(RBBI3-1),Os02t0510300-01(-),Os02t0739000-01(-),Os03t0279200-01(-),Os03t0381200-01(-),Os03t0381200-02(-),Os03t0687800-01(-),Os03t0747600-02(-),Os03t0749800-02(-),Os03t0853700-01(-),Os04t0571200-01(OsRFPH2-14),Os04t0582900-01(-),Os05t0121600-01(RSR1),Os05t0390600-00(-),Os06t0106000-01(-),Os06t0106000-02(-),Os06t0229066-00(-),Os06t0300800-01(OsWD40-128),Os06t064370…
GO:0008150	Biological Process	GO:0051704	multi-organism process	19	Os01t0889900-01(-),Os02t0603800-01(OsHDS),Os02t0625000-01(OSCRY2),Os02t0712700-01(-),Os03t0131200-01(CATC),Os03t0131200-02(CATC),Os03t0556600-01(-),Os03t0760200-01(bel),Os04t0103500-01(YK28),Os04t0109400-00(-),Os04t0288500-01(-),Os04t0618700-01(Os-FLS2),Os05t0368100-00(-),Os06t0164900-00(-),Os06t0498400-01(-),Os07t0550900-01(-),Os07t0575700-01(SIT3),Os09t0516900-01(-),Os12t0606000-00(-)
GO:0008150	Biological Process	GO:0009987	cellular process	659	Os01t0106700-00(-),Os01t0111100-01(OsCYP26-2),Os01t0122701-00(-),Os01t0123800-00(-),Os01t0124200-02(RBBI3-1),Os01t0128000-01(-),Os01t0166800-01(-),Os01t0176900-00(-),Os01t0196300-01(DPF),Os01t0197450-00(-),Os01t0204000-01(-),Os01t0204000-02(-),Os01t0205900-01(prx2),Os01t0205900-02(prx2),Os01t0212500-01(OsSPEAR2),Os01t0218100-01(OsbHLH037),Os01t0238500-01(-),Os01t0238500-02(-),Os01t0242500-01(-),O…
GO:0003674	Molecular Function	GO:0140110	transcription regulator activity	63	Os01t0176900-00(-),Os01t0212500-01(OsSPEAR2),Os01t0289600-00(OsWRKY9),Os01t0571300-01(OsHsfA7),Os01t0572300-01(OsIDD11),Os01t0625300-01(HSFC1A),Os01t0626400-01(WRKY11),Os01t0626400-02(WRKY11),Os01t0693400-01(AP2/EREBP#127),Os01t0733200-01(OsHsfC1b),Os01t0812000-01(GAMYB),Os01t0812000-02(GAMYB),Os01t0844900-01(-),Os01t0935000-01(OsIDD9),Os02t0202000-01(ERF3),Os02t0232000-01(HSFC2A),Os02t0662700-01…
GO:0003674	Molecular Function	GO:0005215	transporter activity	96	Os01t0172100-01(OsPPT3),Os01t0202800-00(OsNIP1),Os01t0207900-00(OsUMAMIT3),Os01t0232100-01(OsTIP4),Os01t0321300-00(-),Os01t0385400-01(OsSLAC7),Os01t0385400-02(OsSLAC7),Os01t0504100-01(OsPUP8),Os01t0516900-00(OsABCG33),Os01t0567500-01(OsMST8),Os01t0567600-00(OsMST7),Os01t0601000-00(OsEnS-10),Os01t0684900-01(-),Os01t0756700-01(KAT1),Os01t0852200-03(-),Os01t0871500-01(-),Os02t0190000-00(-),Os02t0211…
GO:0003674	Molecular Function	GO:0003824	catalytic activity	624	Os01t0105900-01(-),Os01t0106700-00(-),Os01t0111100-01(OsCYP26-2),Os01t0126900-01(OsLPR4),Os01t0127000-01(OsLPR3),Os01t0196600-01(-),Os01t0197100-01(D2),Os01t0199400-01(-),Os01t0204000-01(-),Os01t0204000-02(-),Os01t0205900-01(prx2),Os01t0205900-02(prx2),Os01t0217000-01(OsTBL19),Os01t0227800-01(-),Os01t0238500-01(-),Os01t0238500-02(-),Os01t0242500-01(-),Os01t0261600-00(-),Os01t0262000-00(-),Os01t02…
GO:0003674	Molecular Function	GO:0060089	molecular transducer activity	23	Os01t0367700-01(Orysa),Os01t0575400-00(-),Os02t0283800-01(TMS10),Os02t0625000-01(OSCRY2),Os02t0712700-01(-),Os03t0773300-01(-),Os04t0109400-00(-),Os04t0288500-01(-),Os04t0430400-01(-),Os04t0488000-01(CDKG),Os04t0488000-02(CDKG),Os04t0509000-01(-),Os05t0125300-00(OsRLCK177),Os05t0387700-01(OsRLCK186),Os05t0387700-02(OsRLCK186),Os06t0190700-00(OsGLR4.8),Os06t0643700-01(-),Os06t0694000-01(OsZTL2),Os…
GO:0003674	Molecular Function	GO:0140104	molecular carrier activity	3	Os07t0613300-01(-),Os07t0613300-02(-),Os10t0477000-01(-)
GO:0003674	Molecular Function	GO:0045735	nutrient reservoir activity	5	Os03t0197300-01(-),Os05t0277500-01(OsGLP5-2),Os07t0216700-01(-),Os08t0189100-01(GLP8-2),Os08t0189600-01(GLP8-7)
GO:0003674	Molecular Function	GO:0016209	antioxidant activity	13	Os01t0205900-01(prx2),Os01t0205900-02(prx2),Os02t0741200-01(prx31),Os03t0131200-01(CATC),Os03t0131200-02(CATC),Os04t0473900-01(DWA1),Os04t0628200-01(prx56),Os06t0547100-00(prx87),Os06t0547400-01(prx86),Os06t0681600-01(prx89),Os06t0681600-02(prx89),Os08t0113000-01(prx117),Os12t0178100-01(OsAPx6)
GO:0003674	Molecular Function	GO:0005488	binding	755	Os01t0106700-00(-),Os01t0123800-00(-),Os01t0126900-01(OsLPR4),Os01t0127000-01(OsLPR3),Os01t0128000-01(-),Os01t0139200-01(-),Os01t0139200-02(-),Os01t0149350-00(-),Os01t0149500-01(PIT),Os01t0166800-01(-),Os01t0170800-01(-),Os01t0196300-01(DPF),Os01t0197100-01(D2),Os01t0197450-00(-),Os01t0205900-01(prx2),Os01t0205900-02(prx2),Os01t0218100-01(OsbHLH037),Os01t0227800-01(-),Os01t0238500-01(-),Os01t0238…
GO:0003674	Molecular Function	GO:0090729	toxin activity	1	Os03t0687800-01(-)
GO:0003674	Molecular Function	GO:0031386	protein tag	1	Os03t0808400-00(-)
GO:0003674	Molecular Function	GO:0098772	molecular function regulator	14	Os01t0124200-02(RBBI3-1),Os01t0849100-01(OsRacGEF1),Os03t0283800-01(-),Os04t0563700-01(cycB2),Os05t0390600-00(-),Os06t0338900-01(-),Os06t0699900-01(OsRpn1b),Os07t0216700-01(-),Os08t0108100-01(-),Os08t0220400-01(OsPME24),Os08t0421100-00(CycD1),Os09t0542700-00(-),Os11t0149400-01(OsPSK2),Os12t0147800-01(OsPSK3)
GO:0003674	Molecular Function	GO:0005198	structural molecule activity	11	Os02t0205000-01(-),Os03t0225500-01(NUP133),Os03t0225500-02(NUP133),Os03t0576700-01(RPL13b),Os06t0683200-01(-),Os06t0701400-01(-),Os07t0685400-01(-),Os09t0501200-01(rpL32_9.1),Os11t0104866-00(-),Os11t0550800-01(-),Os12t0104766-00(-)
GO:0005575	Cellular Component	GO:0005576	extracellular region	56	Os01t0124200-02(RBBI3-1),Os01t0205900-01(prx2),Os01t0205900-02(prx2),Os01t0533400-01(OsBgal5),Os01t0634500-00(OsLAC2),Os01t0679550-00(-),Os01t0827300-01(OsChI1),Os01t0842400-01(Oslacc),Os01t0842500-01(OsLAC5),Os01t0850550-00(OsLAC7),Os01t0850700-02(OsLAC8),Os01t0850800-00(OsLAC9),Os02t0733300-01(OsGH9B1),Os02t0749700-01(OsLAC10),Os03t0261100-01(PLA2-II),Os03t0273200-01(Lac),Os03t0273200-02(Lac),O…
GO:0005575	Cellular Component	GO:0055044	symplast	20	Os02t0100600-01(-),Os02t0719700-01(OsBAG6),Os03t0124200-01(OsCrRLK1L6),Os03t0751100-01(OPT),Os03t0791700-01(-),Os04t0628200-01(prx56),Os05t0277500-01(OsGLP5-2),Os05t0317900-01(OsCrRLK1L2),Os05t0367900-01(-),Os06t0133600-01(-),Os06t0133600-02(-),Os06t0334300-01(OsCrRLK1L14),Os06t0681600-01(prx89),Os07t0134700-00(-),Os07t0166700-01(-),Os08t0113000-01(prx117),Os11t0104866-00(-),Os12t0104766-00(-),Os…
GO:0005575	Cellular Component	GO:0030054	cell junction	20	Os02t0100600-01(-),Os02t0719700-01(OsBAG6),Os03t0124200-01(OsCrRLK1L6),Os03t0751100-01(OPT),Os03t0791700-01(-),Os04t0628200-01(prx56),Os05t0277500-01(OsGLP5-2),Os05t0317900-01(OsCrRLK1L2),Os05t0367900-01(-),Os06t0133600-01(-),Os06t0133600-02(-),Os06t0334300-01(OsCrRLK1L14),Os06t0681600-01(prx89),Os07t0134700-00(-),Os07t0166700-01(-),Os08t0113000-01(prx117),Os11t0104866-00(-),Os12t0104766-00(-),Os…
GO:0005575	Cellular Component	GO:0005623	cell	709	Os01t0106700-00(-),Os01t0111100-01(OsCYP26-2),Os01t0122701-00(-),Os01t0123800-00(-),Os01t0127000-01(OsLPR3),Os01t0128000-01(-),Os01t0166800-01(-),Os01t0170800-01(-),Os01t0172100-01(OsPPT3),Os01t0176800-01(-),Os01t0182832-00(-),Os01t0196300-01(DPF),Os01t0196600-01(-),Os01t0197450-00(-),Os01t0199400-01(-),Os01t0204000-01(-),Os01t0204000-02(-),Os01t0207900-00(OsUMAMIT3),Os01t0217000-01(OsTBL19),Os01…
GO:0005575	Cellular Component	GO:0044464	cell part	700	Os01t0106700-00(-),Os01t0111100-01(OsCYP26-2),Os01t0122701-00(-),Os01t0123800-00(-),Os01t0127000-01(OsLPR3),Os01t0128000-01(-),Os01t0166800-01(-),Os01t0170800-01(-),Os01t0172100-01(OsPPT3),Os01t0176800-01(-),Os01t0182832-00(-),Os01t0196300-01(DPF),Os01t0196600-01(-),Os01t0197450-00(-),Os01t0199400-01(-),Os01t0204000-01(-),Os01t0204000-02(-),Os01t0207900-00(OsUMAMIT3),Os01t0217000-01(OsTBL19),Os01…
GO:0005575	Cellular Component	GO:0009295	nucleoid	3	Os01t0642900-01(SSB),Os04t0459800-01(-),Os05t0509700-01(SSB)
GO:0005575	Cellular Component	GO:0099080	supramolecular complex	7	Os01t0744000-01(-),Os02t0588300-01(-),Os03t0381200-01(-),Os03t0381200-02(-),Os07t0115600-00(-),Os10t0512800-01(OsRFPHC-10),Os12t0577000-00(-)
GO:0005575	Cellular Component	GO:0044425	membrane part	387	Os01t0127000-01(OsLPR3),Os01t0133100-02(-),Os01t0172100-01(OsPPT3),Os01t0176800-01(-),Os01t0196600-01(-),Os01t0197100-01(D2),Os01t0199400-01(-),Os01t0199400-02(-),Os01t0202800-00(OsNIP1),Os01t0207900-00(OsUMAMIT3),Os01t0227800-01(-),Os01t0232100-01(OsTIP4),Os01t0238700-01(OsYSL1),Os01t0346600-01(-),Os01t0363300-01(-),Os01t0363300-02(-),Os01t0368700-01(-),Os01t0385400-01(OsSLAC7),Os01t0385400-02(O…
GO:0005575	Cellular Component	GO:0016020	membrane	454	Os01t0127000-01(OsLPR3),Os01t0133100-02(-),Os01t0172100-01(OsPPT3),Os01t0176800-01(-),Os01t0196600-01(-),Os01t0197100-01(D2),Os01t0199400-01(-),Os01t0199400-02(-),Os01t0202800-00(OsNIP1),Os01t0207900-00(OsUMAMIT3),Os01t0227800-01(-),Os01t0232100-01(OsTIP4),Os01t0238700-01(OsYSL1),Os01t0321300-00(-),Os01t0346600-01(-),Os01t0347100-01(-),Os01t0363300-01(-),Os01t0363300-02(-),Os01t0368700-01(-),Os01…
GO:0005575	Cellular Component	GO:0043226	organelle	469	Os01t0106700-00(-),Os01t0111100-01(OsCYP26-2),Os01t0122701-00(-),Os01t0123800-00(-),Os01t0127000-01(OsLPR3),Os01t0128000-01(-),Os01t0166800-01(-),Os01t0170800-01(-),Os01t0172100-01(OsPPT3),Os01t0176800-01(-),Os01t0196300-01(DPF),Os01t0196600-01(-),Os01t0197450-00(-),Os01t0199400-01(-),Os01t0204000-01(-),Os01t0204000-02(-),Os01t0217000-01(OsTBL19),Os01t0218100-01(OsbHLH037),Os01t0232100-01(OsTIP4)…
GO:0005575	Cellular Component	GO:0044421	extracellular region part	3	Os04t0206300-00(-),Os07t0590500-00(-),Os09t0564200-01(-)
GO:0005575	Cellular Component	GO:0031974	membrane-enclosed lumen	37	Os01t0166800-01(-),Os01t0204000-01(-),Os01t0204000-02(-),Os01t0367700-01(Orysa),Os01t0502700-00(-),Os01t0642900-01(SSB),Os01t0683400-01(OsORC4),Os01t0706900-01(-),Os01t0911000-01(-),Os02t0625000-01(OSCRY2),Os03t0279200-01(-),Os03t0646800-01(-),Os03t0728800-01(OsRH16),Os03t0735100-01(OsWD40-87),Os03t0797700-01(-),Os03t0797700-02(-),Os03t0800800-01(-),Os03t0845700-01(-),Os04t0177600-01(-),Os04t0177…
GO:0005575	Cellular Component	GO:0032991	protein-containing complex	118	Os01t0166800-01(-),Os01t0204000-01(-),Os01t0204000-02(-),Os01t0367300-01(-),Os01t0367700-01(Orysa),Os01t0502700-00(-),Os01t0683400-01(OsORC4),Os01t0730900-01(-),Os01t0744000-01(-),Os01t0786800-01(-),Os01t0911000-01(-),Os01t0965600-01(-),Os01t0974701-01(-),Os02t0103800-01(OsLFNR1),Os02t0103800-03(OsLFNR1),Os02t0119400-01(-),Os02t0130900-01(-),Os02t0131700-00(-),Os02t0139600-01(-),Os02t0205000-01(-…
GO:0005575	Cellular Component	GO:0044422	organelle part	150	Os01t0127000-01(OsLPR3),Os01t0166800-01(-),Os01t0172100-01(OsPPT3),Os01t0204000-01(-),Os01t0204000-02(-),Os01t0232100-01(OsTIP4),Os01t0267600-01(-),Os01t0321300-00(-),Os01t0367700-01(Orysa),Os01t0502700-00(-),Os01t0622300-01(HEME),Os01t0642900-01(SSB),Os01t0683400-01(OsORC4),Os01t0706900-01(-),Os01t0730900-01(-),Os01t0744000-01(-),Os01t0852200-03(-),Os01t0869300-01(-),Os01t0896500-01(OsStr10),Os0…

## Sheet:  ZJ22b-vs-ZJ22c
All enrichment GO terms of target of miRNAs between ZJ22b and ZJ22c in the comparison.
GO ID (level1)	GO Term (level1)	GO ID (level2)	GO Term (level2)	number_of_ZJ22b-vs-ZJ22c (All)	Genes_of_ZJ22b-vs-ZJ22c
GO:0008150	Biological Process	GO:0050896	response to stimulus	154	Os01t0149350-00(-),Os01t0149500-01(PIT),Os01t0166800-01(-),Os01t0176900-00(-),Os01t0197450-00(-),Os01t0205900-01(prx2),Os01t0205900-02(prx2),Os01t0292200-01(OsCIPK01),Os01t0308300-00(-),Os01t0321300-00(-),Os01t0603100-01(-),Os01t0730900-01(-),Os01t0869300-01(-),Os01t0927600-01(OsARF4),Os01t0929100-01(-),Os02t0110200-01(HPL3),Os02t0110400-01(-),Os02t0110600-02(-),Os02t0111900-01(-),Os02t0248200-00…
GO:0008150	Biological Process	GO:0050789	regulation of biological process	162	Os01t0124200-02(RBBI3-1),Os01t0152500-00(-),Os01t0176900-00(-),Os01t0197450-00(-),Os01t0218100-01(OsbHLH037),Os01t0292200-01(OsCIPK01),Os01t0321300-00(-),Os01t0367700-01(Orysa),Os01t0393100-01(ONAC026),Os01t0572300-01(OsIDD11),Os01t0626400-01(WRKY11),Os01t0626400-02(WRKY11),Os01t0667900-01(GRX6),Os01t0693400-01(AP2/EREBP#127),Os01t0707500-01(OsbHLH118),Os01t0707500-02(OsbHLH118),Os01t0710200-01(P…
GO:0008150	Biological Process	GO:0032502	developmental process	48	Os01t0122701-00(-),Os01t0197100-01(D2),Os01t0321300-00(-),Os01t0710200-01(PAO1),Os01t0761900-00(-),Os01t0812000-01(GAMYB),Os01t0812000-02(GAMYB),Os02t0110600-02(-),Os02t0690500-01(OsPP2C26),Os02t0749800-01(-),Os03t0167600-01(OsMS2),Os03t0175800-01(BG1),Os03t0360600-00(-),Os03t0381200-01(-),Os03t0381200-02(-),Os03t0433200-01(OsSHR2),Os03t0578900-00(OsGAMYBL2),Os03t0588600-01(-),Os03t0818800-01(AP2…
GO:0008150	Biological Process	GO:0065007	biological regulation	182	Os01t0124200-02(RBBI3-1),Os01t0152500-00(-),Os01t0176900-00(-),Os01t0197100-01(D2),Os01t0197450-00(-),Os01t0218100-01(OsbHLH037),Os01t0292200-01(OsCIPK01),Os01t0321300-00(-),Os01t0367700-01(Orysa),Os01t0385400-01(OsSLAC7),Os01t0385400-02(OsSLAC7),Os01t0393100-01(ONAC026),Os01t0572300-01(OsIDD11),Os01t0626400-01(WRKY11),Os01t0626400-02(WRKY11),Os01t0667900-01(GRX6),Os01t0693400-01(AP2/EREBP#127),O…
GO:0008150	Biological Process	GO:0048511	rhythmic process	3	Os03t0131200-01(CATC),Os03t0131200-02(CATC),Os09t0535300-01(-)
GO:0008150	Biological Process	GO:0032501	multicellular organismal process	40	Os01t0122701-00(-),Os01t0197100-01(D2),Os01t0761900-00(-),Os01t0812000-01(GAMYB),Os01t0812000-02(GAMYB),Os02t0690500-01(OsPP2C26),Os03t0167600-01(OsMS2),Os03t0175800-01(BG1),Os03t0433200-01(OsSHR2),Os03t0556600-01(-),Os03t0588600-01(-),Os03t0818800-01(AP2/EREBP#033),Os03t0851800-01(PANC),Os04t0483500-01(KCR1),Os04t0517600-00(-),Os04t0649100-03(SHAT1),Os05t0104100-01(OsFH14),Os05t0104100-02(OsFH14…
GO:0008150	Biological Process	GO:0040007	growth	7	Os02t0690500-01(OsPP2C26),Os03t0175800-01(BG1),Os04t0517600-00(-),Os05t0459700-01(OsFLA26),Os06t0203800-01(RLCK204),Os08t0108100-01(-),Os10t0577200-01(-)
GO:0008150	Biological Process	GO:0023052	signaling	45	Os01t0176900-00(-),Os01t0197450-00(-),Os01t0292200-01(OsCIPK01),Os01t0927600-01(OsARF4),Os02t0110600-02(-),Os02t0248200-00(-),Os02t0283800-01(TMS10),Os02t0532800-00(-),Os02t0666300-01(YDA2),Os02t0811200-00(OsWAK24),Os03t0175800-01(BG1),Os03t0769500-01(-),Os04t0213800-00(OsRLCK137),Os04t0430400-01(-),Os04t0437600-01(-),Os04t0509000-01(-),Os05t0136200-01(OsCIPK17),Os05t0136200-02(OsCIPK17),Os05t045…
GO:0008150	Biological Process	GO:0098754	detoxification	8	Os01t0205900-01(prx2),Os01t0205900-02(prx2),Os02t0741200-01(prx31),Os03t0131200-01(CATC),Os03t0131200-02(CATC),Os04t0628200-01(prx56),Os06t0547400-01(prx86),Os08t0113000-01(prx117)
GO:0008150	Biological Process	GO:0022414	reproductive process	21	Os01t0812000-01(GAMYB),Os01t0812000-02(GAMYB),Os03t0175800-01(BG1),Os03t0556600-01(-),Os03t0588600-01(-),Os03t0818800-01(AP2/EREBP#033),Os03t0851800-01(PANC),Os04t0483500-01(KCR1),Os04t0517600-00(-),Os04t0649100-03(SHAT1),Os05t0121600-01(RSR1),Os05t0459700-01(OsFLA26),Os06t0665400-01(APO1),Os07t0235800-01(SNB),Os07t0550900-01(-),Os07t0613300-01(-),Os07t0613300-02(-),Os09t0407600-01(OsMsh6),Os09t0…
GO:0008150	Biological Process	GO:0000003	reproduction	21	Os01t0812000-01(GAMYB),Os01t0812000-02(GAMYB),Os03t0175800-01(BG1),Os03t0556600-01(-),Os03t0588600-01(-),Os03t0818800-01(AP2/EREBP#033),Os03t0851800-01(PANC),Os04t0483500-01(KCR1),Os04t0517600-00(-),Os04t0649100-03(SHAT1),Os05t0121600-01(RSR1),Os05t0459700-01(OsFLA26),Os06t0665400-01(APO1),Os07t0235800-01(SNB),Os07t0550900-01(-),Os07t0613300-01(-),Os07t0613300-02(-),Os09t0407600-01(OsMsh6),Os09t0…
GO:0008150	Biological Process	GO:0008152	metabolic process	438	Os01t0122701-00(-),Os01t0124200-02(RBBI3-1),Os01t0125900-01(OsUBC34),Os01t0126900-01(OsLPR4),Os01t0127000-01(OsLPR3),Os01t0152500-00(-),Os01t0166800-01(-),Os01t0168600-01(-),Os01t0176900-00(-),Os01t0197100-01(D2),Os01t0197450-00(-),Os01t0205900-01(prx2),Os01t0205900-02(prx2),Os01t0218100-01(OsbHLH037),Os01t0227800-01(-),Os01t0238500-01(-),Os01t0238500-02(-),Os01t0278950-00(OsSub1),Os01t0291500-01…
GO:0008150	Biological Process	GO:0008283	cell proliferation	1	Os06t0665400-01(APO1)
GO:0008150	Biological Process	GO:0071840	cellular component organization or biogenesis	78	Os01t0166800-01(-),Os01t0274500-00(OsEXPA11),Os01t0321300-00(-),Os01t0363300-01(-),Os01t0363300-02(-),Os01t0584200-00(-),Os01t0851000-01(WLP2),Os01t0851000-02(WLP2),Os01t0869300-01(-),Os01t0911000-01(-),Os02t0111900-01(-),Os02t0690500-01(OsPP2C26),Os02t0696500-01(OsXTH23),Os02t0717300-01(-),Os02t0749800-01(-),Os02t0763200-01(-),Os03t0116000-00(-),Os03t0167600-01(OsMS2),Os03t0271100-01(OsSIG2B),Os…
GO:0008150	Biological Process	GO:0048519	negative regulation of biological process	16	Os01t0124200-02(RBBI3-1),Os03t0381200-01(-),Os03t0381200-02(-),Os03t0433200-01(OsSHR2),Os05t0121600-01(RSR1),Os05t0390600-00(-),Os05t0545600-00(-),Os06t0229066-00(-),Os06t0300800-01(OsWD40-128),Os06t0643700-01(-),Os06t0725900-01(OsFtsH1),Os07t0216700-01(-),Os09t0363600-01(OsWD40-171),Os09t0407600-01(OsMsh6),Os09t0493600-01(-),Os09t0535300-01(-)
GO:0008150	Biological Process	GO:0002376	immune system process	1	Os02t0475300-01(-)
GO:0008150	Biological Process	GO:0051704	multi-organism process	8	Os03t0131200-01(CATC),Os03t0131200-02(CATC),Os03t0556600-01(-),Os03t0760200-01(bel),Os06t0498400-01(-),Os07t0550900-01(-),Os07t0575700-01(SIT3),Os12t0606000-00(-)
GO:0008150	Biological Process	GO:0051179	localization	72	Os01t0172100-01(OsPPT3),Os01t0202800-00(OsNIP1),Os01t0232100-01(OsTIP4),Os01t0321300-00(-),Os01t0385400-01(OsSLAC7),Os01t0385400-02(OsSLAC7),Os01t0504100-01(OsPUP8),Os01t0584200-00(-),Os01t0756700-01(KAT1),Os01t0759100-01(OsTLP12),Os01t0871500-01(-),Os02t0211000-00(OsABCA1),Os02t0248200-00(-),Os02t0530100-01(OsATX1),Os02t0644200-01(-),Os02t0670900-02(OsANT3),Os02t0693700-02(OsABCB11),Os02t0717300…
GO:0008150	Biological Process	GO:0048518	positive regulation of biological process	12	Os01t0367700-01(Orysa),Os02t0666300-01(YDA2),Os02t0714300-01(OsSTA71),Os03t0175800-01(BG1),Os04t0437600-01(-),Os06t0191300-01(OsMKK5),Os06t0301300-00(-),Os06t0565200-00(HSfA6),Os07t0596600-02(Orysa),Os09t0443500-01(OsMED20_1),Os09t0526600-02(HSFB2C),Os12t0577000-00(-)
GO:0008150	Biological Process	GO:0009987	cellular process	403	Os01t0122701-00(-),Os01t0124200-02(RBBI3-1),Os01t0125900-01(OsUBC34),Os01t0152500-00(-),Os01t0166800-01(-),Os01t0176900-00(-),Os01t0197450-00(-),Os01t0205900-01(prx2),Os01t0205900-02(prx2),Os01t0218100-01(OsbHLH037),Os01t0238500-01(-),Os01t0238500-02(-),Os01t0274500-00(OsEXPA11),Os01t0291500-01(OsAT4),Os01t0291500-02(OsAT4),Os01t0292200-01(OsCIPK01),Os01t0306400-01(OsDOG1L-1),Os01t0321300-00(-),O…
GO:0003674	Molecular Function	GO:0045735	nutrient reservoir activity	7	Os03t0693700-01(OsOxO1),Os03t0693900-00(OsOxO3),Os03t0694000-01(Osoxo4),Os05t0277500-01(OsGLP5-2),Os07t0216700-01(-),Os08t0189100-01(GLP8-2),Os08t0189600-01(GLP8-7)
GO:0003674	Molecular Function	GO:0140110	transcription regulator activity	38	Os01t0176900-00(-),Os01t0572300-01(OsIDD11),Os01t0626400-01(WRKY11),Os01t0626400-02(WRKY11),Os01t0693400-01(AP2/EREBP#127),Os01t0812000-01(GAMYB),Os01t0812000-02(GAMYB),Os01t0935000-01(OsIDD9),Os02t0714300-01(OsSTA71),Os03t0197800-00(OsIDD1),Os03t0237250-01(OsIDD14),Os03t0271100-01(OsSIG2B),Os03t0271100-02(OsSIG2B),Os03t0271100-03(OsSIG2B),Os03t0433200-01(OsSHR2),Os03t0578900-00(OsGAMYBL2),Os03t0…
GO:0003674	Molecular Function	GO:0060089	molecular transducer activity	14	Os01t0367700-01(Orysa),Os02t0110600-02(-),Os02t0283800-01(TMS10),Os04t0213800-00(OsRLCK137),Os04t0430400-01(-),Os04t0509000-01(-),Os06t0643700-01(-),Os06t0654600-00(OsRLCK210),Os07t0575700-01(SIT3),Os07t0596600-02(Orysa),Os08t0376600-01(-),Os11t0102200-00(-),Os12t0427450-00(-),Os12t0606000-00(-)
GO:0003674	Molecular Function	GO:0140104	molecular carrier activity	2	Os07t0613300-01(-),Os07t0613300-02(-)
GO:0003674	Molecular Function	GO:0016209	antioxidant activity	8	Os01t0205900-01(prx2),Os01t0205900-02(prx2),Os02t0741200-01(prx31),Os03t0131200-01(CATC),Os03t0131200-02(CATC),Os04t0628200-01(prx56),Os06t0547400-01(prx86),Os08t0113000-01(prx117)
GO:0003674	Molecular Function	GO:0005488	binding	483	Os01t0126900-01(OsLPR4),Os01t0127000-01(OsLPR3),Os01t0149350-00(-),Os01t0149500-01(PIT),Os01t0152500-00(-),Os01t0166800-01(-),Os01t0197100-01(D2),Os01t0197450-00(-),Os01t0205900-01(prx2),Os01t0205900-02(prx2),Os01t0218100-01(OsbHLH037),Os01t0227800-01(-),Os01t0232200-00(OsWD40-10),Os01t0238500-01(-),Os01t0238500-02(-),Os01t0280400-00(-),Os01t0292200-01(OsCIPK01),Os01t0306400-01(OsDOG1L-1),Os01t03…
GO:0003674	Molecular Function	GO:0005215	transporter activity	49	Os01t0172100-01(OsPPT3),Os01t0202800-00(OsNIP1),Os01t0232100-01(OsTIP4),Os01t0321300-00(-),Os01t0385400-01(OsSLAC7),Os01t0385400-02(OsSLAC7),Os01t0504100-01(OsPUP8),Os01t0756700-01(KAT1),Os01t0871500-01(-),Os02t0211000-00(OsABCA1),Os02t0530100-01(OsATX1),Os02t0644200-01(-),Os02t0670900-02(OsANT3),Os02t0693700-02(OsABCB11),Os02t0717300-01(-),Os02t0821600-00(-),Os03t0116000-00(-),Os03t0187800-01(Os…
GO:0003674	Molecular Function	GO:0003824	catalytic activity	374	Os01t0125900-01(OsUBC34),Os01t0126900-01(OsLPR4),Os01t0127000-01(OsLPR3),Os01t0168600-01(-),Os01t0197100-01(D2),Os01t0199400-01(-),Os01t0205900-01(prx2),Os01t0205900-02(prx2),Os01t0227800-01(-),Os01t0238500-01(-),Os01t0238500-02(-),Os01t0261600-00(-),Os01t0262000-00(-),Os01t0278950-00(OsSub1),Os01t0291500-01(OsAT4),Os01t0291500-02(OsAT4),Os01t0292200-01(OsCIPK01),Os01t0316100-00(-),Os01t0321300-0…
GO:0003674	Molecular Function	GO:0098772	molecular function regulator	8	Os01t0124200-02(RBBI3-1),Os05t0390600-00(-),Os06t0301300-00(-),Os07t0216700-01(-),Os08t0108100-01(-),Os08t0142500-01(-),Os08t0220400-01(OsPME24),Os09t0542700-00(-)
GO:0003674	Molecular Function	GO:0005198	structural molecule activity	6	Os01t0815100-00(-),Os03t0576700-01(RPL13b),Os03t0612600-01(-),Os04t0461100-01(-),Os06t0683200-01(-),Os09t0501200-01(rpL32_9.1)
GO:0005575	Cellular Component	GO:0009295	nucleoid	5	Os01t0851000-01(WLP2),Os01t0851000-02(WLP2),Os05t0393400-01(-),Os05t0393400-02(-),Os05t0393400-03(-)
GO:0005575	Cellular Component	GO:0005576	extracellular region	32	Os01t0124200-02(RBBI3-1),Os01t0205900-01(prx2),Os01t0205900-02(prx2),Os01t0274500-00(OsEXPA11),Os01t0679550-00(-),Os02t0696500-01(OsXTH23),Os03t0261100-01(PLA2-II),Os03t0693700-01(OsOxO1),Os03t0693900-00(OsOxO3),Os03t0694000-01(Osoxo4),Os04t0165000-01(-),Os04t0604900-01(OsXTH16),Os05t0129200-00(OsGH9B12),Os05t0277500-01(OsGLP5-2),Os06t0237400-01(-),Os06t0509600-00(-),Os06t0547400-01(prx86),Os06t0…
GO:0005575	Cellular Component	GO:0044425	membrane part	231	Os01t0127000-01(OsLPR3),Os01t0133100-02(-),Os01t0168600-01(-),Os01t0172100-01(OsPPT3),Os01t0176800-01(-),Os01t0197100-01(D2),Os01t0199400-01(-),Os01t0199400-02(-),Os01t0202800-00(OsNIP1),Os01t0227800-01(-),Os01t0232100-01(OsTIP4),Os01t0346600-01(-),Os01t0363300-01(-),Os01t0363300-02(-),Os01t0385400-01(OsSLAC7),Os01t0385400-02(OsSLAC7),Os01t0504100-01(OsPUP8),Os01t0555300-01(-),Os01t0557550-00(-),…
GO:0005575	Cellular Component	GO:0016020	membrane	272	Os01t0127000-01(OsLPR3),Os01t0133100-02(-),Os01t0168600-01(-),Os01t0172100-01(OsPPT3),Os01t0176800-01(-),Os01t0197100-01(D2),Os01t0199400-01(-),Os01t0199400-02(-),Os01t0202800-00(OsNIP1),Os01t0227800-01(-),Os01t0232100-01(OsTIP4),Os01t0274500-00(OsEXPA11),Os01t0321300-00(-),Os01t0346600-01(-),Os01t0363300-01(-),Os01t0363300-02(-),Os01t0385400-01(OsSLAC7),Os01t0385400-02(OsSLAC7),Os01t0504100-01(O…
GO:0005575	Cellular Component	GO:0099080	supramolecular complex	4	Os03t0381200-01(-),Os03t0381200-02(-),Os07t0115600-00(-),Os12t0577000-00(-)
GO:0005575	Cellular Component	GO:0005623	cell	412	Os01t0122701-00(-),Os01t0125900-01(OsUBC34),Os01t0127000-01(OsLPR3),Os01t0166800-01(-),Os01t0168600-01(-),Os01t0172100-01(OsPPT3),Os01t0176800-01(-),Os01t0197450-00(-),Os01t0199400-01(-),Os01t0218100-01(OsbHLH037),Os01t0232100-01(OsTIP4),Os01t0238500-01(-),Os01t0238500-02(-),Os01t0274500-00(OsEXPA11),Os01t0280400-00(-),Os01t0292200-01(OsCIPK01),Os01t0321300-00(-),Os01t0363300-01(-),Os01t0363300-0…
GO:0005575	Cellular Component	GO:0044464	cell part	406	Os01t0122701-00(-),Os01t0125900-01(OsUBC34),Os01t0127000-01(OsLPR3),Os01t0166800-01(-),Os01t0168600-01(-),Os01t0172100-01(OsPPT3),Os01t0176800-01(-),Os01t0197450-00(-),Os01t0199400-01(-),Os01t0218100-01(OsbHLH037),Os01t0232100-01(OsTIP4),Os01t0238500-01(-),Os01t0238500-02(-),Os01t0274500-00(OsEXPA11),Os01t0280400-00(-),Os01t0292200-01(OsCIPK01),Os01t0321300-00(-),Os01t0363300-01(-),Os01t0363300-0…
GO:0005575	Cellular Component	GO:0055044	symplast	9	Os04t0628200-01(prx56),Os05t0277500-01(OsGLP5-2),Os05t0317900-01(OsCrRLK1L2),Os05t0367900-01(-),Os06t0567900-01(AO),Os07t0134700-00(-),Os07t0166700-01(-),Os08t0113000-01(prx117),Os12t0159000-01(-)
GO:0005575	Cellular Component	GO:0030054	cell junction	9	Os04t0628200-01(prx56),Os05t0277500-01(OsGLP5-2),Os05t0317900-01(OsCrRLK1L2),Os05t0367900-01(-),Os06t0567900-01(AO),Os07t0134700-00(-),Os07t0166700-01(-),Os08t0113000-01(prx117),Os12t0159000-01(-)
GO:0005575	Cellular Component	GO:0043226	organelle	273	Os01t0122701-00(-),Os01t0127000-01(OsLPR3),Os01t0166800-01(-),Os01t0172100-01(OsPPT3),Os01t0176800-01(-),Os01t0197450-00(-),Os01t0199400-01(-),Os01t0218100-01(OsbHLH037),Os01t0232100-01(OsTIP4),Os01t0280400-00(-),Os01t0292200-01(OsCIPK01),Os01t0321300-00(-),Os01t0367700-01(Orysa),Os01t0393100-01(ONAC026),Os01t0572300-01(OsIDD11),Os01t0584200-00(-),Os01t0626400-01(WRKY11),Os01t0635200-01(-),Os01t0…
GO:0005575	Cellular Component	GO:0031974	membrane-enclosed lumen	15	Os01t0166800-01(-),Os01t0367700-01(Orysa),Os01t0911000-01(-),Os03t0646800-01(-),Os05t0312000-01(OsMed5_1),Os07t0596600-02(Orysa),Os07t0613300-01(-),Os07t0613300-02(-),Os07t0681500-01(OsMED5_3),Os08t0492100-02(-),Os09t0443500-01(OsMED20_1),Os11t0130900-00(-),Os12t0242900-01(-),Os12t0561200-01(-),Os12t0605800-01(OsL55)
GO:0005575	Cellular Component	GO:0044422	organelle part	77	Os01t0127000-01(OsLPR3),Os01t0166800-01(-),Os01t0172100-01(OsPPT3),Os01t0232100-01(OsTIP4),Os01t0321300-00(-),Os01t0367700-01(Orysa),Os01t0730900-01(-),Os01t0851000-01(WLP2),Os01t0851000-02(WLP2),Os01t0869300-01(-),Os01t0911000-01(-),Os01t0928800-01(OsLCB2a1),Os02t0103800-01(OsLFNR1),Os02t0103800-03(OsLFNR1),Os02t0110200-01(HPL3),Os02t0110400-01(-),Os02t0110600-02(-),Os02t0248200-00(-),Os02t06709…
GO:0005575	Cellular Component	GO:0032991	protein-containing complex	55	Os01t0166800-01(-),Os01t0367700-01(Orysa),Os01t0730900-01(-),Os01t0815100-00(-),Os01t0911000-01(-),Os01t0974701-01(-),Os02t0103800-01(OsLFNR1),Os02t0103800-03(OsLFNR1),Os02t0130900-01(-),Os02t0139600-01(-),Os02t0248200-00(-),Os02t0634900-01(PAB2),Os02t0717300-01(-),Os03t0381200-01(-),Os03t0381200-02(-),Os03t0576700-01(RPL13b),Os03t0612600-01(-),Os03t0646800-01(-),Os04t0312100-01(-),Os04t0461100-0…
