# Supplementary material for: Whole-Transcriptome Analysis Reveals Autophagy Is Involved in Early Senescence of zj-es Mutant Rice
Source: Front Plant Sci. 2022 Jun 3;13:899054. doi: 10.3389/fpls.2022.899054 (PMC9204060; doi:10.3389/fpls.2022.899054)
Supplement: Supplementary file 6 [file Table_4.XLSX]

## Sheet: ZJ22a-vs-zj-esa
All enrichment KEGG terms of target of miRNAs between ZJ22a and zj-esa in the comparison.
KEGG_A_class	KEGG_B_class	Pathway	ZJ22a-vs-Pir1a (70)	All (7519)	Pvalue	Qvalue	Pathway ID	Genes	K_IDs
Metabolism	Carbohydrate metabolism	Propanoate metabolism	3	47	0.00935107	0.351078	ko00640	Os03t0310400-01(-);Os07t0170100-01(-);Os07t0170100-02(-)	K01692+K00167+K00167
Metabolism	Carbohydrate metabolism	Pyruvate metabolism	5	154	0.0140477	0.351078	ko00620	Os08t0191700-01(GLYI-11);Os08t0191700-02(GLYI-11);Os08t0191700-03(GLYI-11);Os08t0191700-04(GLYI-11);Os03t0672300-01(-)	K01759+K01759+K01759+K01759+K00873
Metabolism	Amino acid metabolism	Tryptophan metabolism	4	103	0.0152643	0.351078	ko00380	Os09t0528700-00(OsCYP76M7);Os03t0310400-01(-);Os03t0131200-01(CATC);Os03t0131200-02(CATC)	K07408+K01692+K03781+K03781
Metabolism	Amino acid metabolism	Valine, leucine and isoleucine degradation	3	73	0.0302371	0.4669	ko00280	Os03t0310400-01(-);Os07t0170100-01(-);Os07t0170100-02(-)	K01692+K00167+K00167
Metabolism	Carbohydrate metabolism	Starch and sucrose metabolism	6	269	0.038523	0.4669	ko00500	Os09t0457400-01(Amy3A/B/C*(RAmy3A/B/C));Os07t0421300-01(-);Os02t0129600-01(-);Os09t0530200-01(OsGH9B14);Os04t0535600-01(OSINV2);Os04t0535600-02(OSINV2)	K01176+K01187+K01177+K01179+K01193+K01193
Metabolism	Carbohydrate metabolism	Galactose metabolism	3	82	0.0406	0.4669	ko00052	Os07t0421300-01(-);Os04t0535600-01(OSINV2);Os04t0535600-02(OSINV2)	K01187+K01193+K01193
Metabolism	Global and overview maps	Biosynthesis of secondary metabolites	25	2022	0.0649981	0.586459	ko01110	Os09t0422000-01(HCT3);Os11t0530600-01(CHS*);Os03t0310400-01(-);Os09t0457400-01(Amy3A/B/C*(RAmy3A/B/C));Os04t0650700-03(OsASNase2);Os04t0650700-01(OsASNase2);Os03t0131200-01(CATC);Os03t0131200-02(CATC);Os07t0421300-01(-);Os02t0129600-01(-);Os07t0170100-01(-);Os07t0170100-02(-);Os01t0948400-02(OsP5CR);Os01t0948400-01(OsP5CR);Os06t0547400-01(prx86);Os03t0797000-01(-);Os03t0743900-01(OsATPS);Os03t081…	K13065+K00660+K01692+K01176+K13051+K13051+K03781+K03781+K01187+K01177+K00167+K00167+K00286+K00286+K00430+K01695+K13811+K14674+K00276+K00873+K01193+K01193+K13513+K00430+K00430
Metabolism	Carbohydrate metabolism	Inositol phosphate metabolism	3	109	0.0808162	0.586459	ko00562	Os02t0822500-04(-);Os02t0822500-03(-);Os02t0822500-01(-)	K00889+K00889+K00889
Cellular Processes	Transport and catabolism	Endocytosis	5	249	0.0815743	0.586459	ko04144	Os02t0822500-04(-);Os02t0822500-03(-);Os02t0822500-01(-);Os03t0381200-02(-);Os03t0381200-01(-)	K00889+K00889+K00889+K10365+K10365
Environmental Information Processing	Signal transduction	Phosphatidylinositol signaling system	3	115	0.0914555	0.586459	ko04070	Os02t0822500-04(-);Os02t0822500-03(-);Os02t0822500-01(-)	K00889+K00889+K00889
Metabolism	Global and overview maps	Metabolic pathways	39	3546	0.0934934	0.586459	ko01100	Os10t0514700-00(-);Os09t0528700-00(OsCYP76M7);Os09t0422000-01(HCT3);Os11t0530600-01(CHS*);Os03t0310400-01(-);Os09t0457400-01(Amy3A/B/C*(RAmy3A/B/C));Os04t0650700-03(OsASNase2);Os04t0650700-01(OsASNase2);Os03t0131200-01(CATC);Os03t0131200-02(CATC);Os07t0421300-01(-);Os02t0129600-01(-);Os08t0191700-01(GLYI-11);Os08t0191700-02(GLYI-11);Os08t0191700-03(GLYI-11);Os08t0191700-04(GLYI-11);Os07t0170100-0…	K00512+K07408+K13065+K00660+K01692+K01176+K13051+K13051+K03781+K03781+K01187+K01177+K01759+K01759+K01759+K01759+K00167+K00167+K00286+K00286+K00430+K01179+K00889+K00889+K00889+K02372+K01213+K00654+K01695+K13811+K14674+K01213+K00276+K00873+K01193+K01193+K13513+K00430+K00430
Metabolism	Metabolism of terpenoids and polyketides	Limonene and pinene degradation	1	12	0.106244	0.596484	ko00903	Os03t0310400-01(-)	K01692
Genetic Information Processing	Folding, sorting and degradation	Ubiquitin mediated proteolysis	4	201	0.116921	0.596484	ko04120	Os12t0626300-01(APC5);Os01t0719100-02(OsRZFP34);Os01t0719100-04(OsRZFP34);Os03t0145900-01(-)	K03352+K10144+K10144+K10144
Metabolism	Biosynthesis of other secondary metabolites	Flavonoid biosynthesis	2	72	0.144451	0.596484	ko00941	Os09t0422000-01(HCT3);Os11t0530600-01(CHS*)	K13065+K00660
Metabolism	Amino acid metabolism	Phenylalanine metabolism	2	74	0.150901	0.596484	ko00360	Os03t0310400-01(-);Os06t0338700-00(-)	K01692+K00276
Metabolism	Metabolism of other amino acids	beta-Alanine metabolism	2	74	0.150901	0.596484	ko00410	Os03t0310400-01(-);Os06t0338700-00(-)	K01692+K00276
Genetic Information Processing	Transcription	Basal transcription factors	2	75	0.154147	0.596484	ko03022	Os09t0534800-01(OsTFIIB);Os09t0534800-02(OsTFIIB)	K03124+K03124
Metabolism	Biosynthesis of other secondary metabolites	Monobactam biosynthesis	1	19	0.162997	0.596484	ko00261	Os03t0743900-01(OsATPS)	K13811
Genetic Information Processing	Replication and repair	DNA replication	2	83	0.180574	0.596484	ko03030	Os10t0574500-00(-);Os07t0406800-01(-)	K10756+K02685
Metabolism	Amino acid metabolism	Alanine, aspartate and glutamate metabolism	2	84	0.183926	0.596484	ko00250	Os04t0650700-03(OsASNase2);Os04t0650700-01(OsASNase2)	K13051+K13051
Metabolism	Lipid metabolism	Arachidonic acid metabolism	1	24	0.201345	0.596484	ko00590	Os03t0810900-01(OspPLAIVbeta)	K14674
Metabolism	Metabolism of cofactors and vitamins	Biotin metabolism	1	24	0.201345	0.596484	ko00780	Os05t0435700-01(-)	K02372
Metabolism	Metabolism of other amino acids	Cyanoamino acid metabolism	2	92	0.211046	0.596484	ko00460	Os04t0650700-03(OsASNase2);Os04t0650700-01(OsASNase2)	K13051+K13051
Metabolism	Amino acid metabolism	Arginine and proline metabolism	2	95	0.221326	0.596484	ko00330	Os01t0948400-02(OsP5CR);Os01t0948400-01(OsP5CR)	K00286+K00286
Genetic Information Processing	Folding, sorting and degradation	Proteasome	2	95	0.221326	0.596484	ko03050	Os02t0133800-01(OsPAF1);Os02t0634900-01(PAB2)	K02725+K02726
Metabolism	Carbohydrate metabolism	Pentose and glucuronate interconversions	2	96	0.224762	0.596484	ko00040	Os06t0611400-01(OsPGL5);Os06t0509600-00(-)	K01213+K01213
Metabolism	Metabolism of other amino acids	Selenocompound metabolism	1	29	0.23796	0.603951	ko00450	Os03t0743900-01(OsATPS)	K13811
Metabolism	Lipid metabolism	Linoleic acid metabolism	1	30	0.245082	0.603951	ko00591	Os03t0810900-01(OspPLAIVbeta)	K14674
Metabolism	Biosynthesis of other secondary metabolites	Stilbenoid, diarylheptanoid and gingerol biosynthesis	1	33	0.266056	0.609695	ko00945	Os09t0422000-01(HCT3)	K13065
Metabolism	Global and overview maps	Fatty acid metabolism	2	111	0.276634	0.609695	ko01212	Os03t0310400-01(-);Os05t0435700-01(-)	K01692+K02372
Metabolism	Amino acid metabolism	Glycine, serine and threonine metabolism	2	119	0.304314	0.609695	ko00260	Os03t0797000-01(-);Os06t0338700-00(-)	K01695+K00276
Genetic Information Processing	Transcription	Spliceosome	4	301	0.307364	0.609695	ko03040	Os02t0122800-01(-);Os02t0122800-02(-);Os01t0265800-02(RBP-P);Os01t0265800-01(RBP-P)	K12893+K12893+K12741+K12741
Metabolism	Biosynthesis of other secondary metabolites	Isoquinoline alkaloid biosynthesis	1	41	0.31922	0.609695	ko00950	Os06t0338700-00(-)	K00276
Metabolism	Carbohydrate metabolism	Butanoate metabolism	1	43	0.331906	0.609695	ko00650	Os03t0310400-01(-)	K01692
Metabolism	Biosynthesis of other secondary metabolites	Phenylpropanoid biosynthesis	4	323	0.354306	0.609695	ko00940	Os09t0422000-01(HCT3);Os06t0547400-01(prx86);Os01t0205900-02(prx2);Os01t0205900-01(prx2)	K13065+K00430+K00430+K00430
Metabolism	Lipid metabolism	Glycerolipid metabolism	2	135	0.359034	0.609695	ko00561	Os03t0810900-01(OspPLAIVbeta);Os01t0782500-01(-)	K14674+K13513
Metabolism	Carbohydrate metabolism	Glyoxylate and dicarboxylate metabolism	2	135	0.359034	0.609695	ko00630	Os03t0131200-01(CATC);Os03t0131200-02(CATC)	K03781+K03781
Metabolism	Energy metabolism	Sulfur metabolism	1	48	0.362612	0.609695	ko00920	Os03t0743900-01(OsATPS)	K13811
Metabolism	Lipid metabolism	Ether lipid metabolism	1	49	0.368584	0.609695	ko00565	Os03t0810900-01(OspPLAIVbeta)	K14674
Metabolism	Biosynthesis of other secondary metabolites	Tropane, piperidine and pyridine alkaloid biosynthesis	1	50	0.374501	0.609695	ko00960	Os06t0338700-00(-)	K00276
Cellular Processes	Transport and catabolism	Peroxisome	2	140	0.37585	0.609695	ko04146	Os03t0131200-01(CATC);Os03t0131200-02(CATC)	K03781+K03781
Metabolism	Lipid metabolism	Sphingolipid metabolism	1	51	0.380363	0.609695	ko00600	Os01t0928800-01(OsLCB2a1)	K00654
Metabolism	Nucleotide metabolism	Purine metabolism	2	143	0.385856	0.609695	ko00230	Os03t0743900-01(OsATPS);Os03t0672300-01(-)	K13811+K00873
Metabolism	Lipid metabolism	Steroid biosynthesis	1	54	0.397627	0.609695	ko00100	Os03t0810900-01(OspPLAIVbeta)	K14674
Genetic Information Processing	Folding, sorting and degradation	SNARE interactions in vesicular transport	1	54	0.397627	0.609695	ko04130	Os11t0168100-01(-)	K08500
Metabolism	Lipid metabolism	Fatty acid biosynthesis	1	58	0.419909	0.616516	ko00061	Os05t0435700-01(-)	K02372
Genetic Information Processing	Transcription	RNA polymerase	1	59	0.425352	0.616516	ko03020	Os05t0151000-00(-)	K03006
Metabolism	Metabolism of cofactors and vitamins	Ubiquinone and other terpenoid-quinone biosynthesis	1	64	0.451818	0.616516	ko00130	Os12t0181300-00(-)	K12501
Metabolism	Amino acid metabolism	Lysine degradation	1	64	0.451818	0.616516	ko00310	Os03t0310400-01(-)	K01692
Metabolism	Global and overview maps	Biosynthesis of amino acids	4	369	0.452118	0.616516	ko01230	Os01t0948400-02(OsP5CR);Os01t0948400-01(OsP5CR);Os03t0797000-01(-);Os03t0672300-01(-)	K00286+K00286+K01695+K00873
Genetic Information Processing	Replication and repair	Mismatch repair	1	66	0.462065	0.616516	ko03430	Os10t0574500-00(-)	K10756
Environmental Information Processing	Signal transduction	Plant hormone signal transduction	4	375	0.464621	0.616516	ko04075	Os03t0265500-01(OsCOI2);Os03t0265500-02(OsCOI2);Os01t0741900-01(IAA6);Os04t0604900-01(OsXTH16)	K13463+K13463+K14484+K14504
Metabolism	Amino acid metabolism	Phenylalanine, tyrosine and tryptophan biosynthesis	1	70	0.481996	0.617548	ko00400	Os03t0797000-01(-)	K01695
Metabolism	Lipid metabolism	Glycerophospholipid metabolism	2	175	0.487736	0.617548	ko00564	Os03t0810900-01(OspPLAIVbeta);Os01t0782500-01(-)	K14674+K13513
Organismal Systems	Environmental adaptation	Circadian rhythm - plant	1	73	0.496464	0.617548	ko04712	Os11t0530600-01(CHS*)	K00660
Metabolism	Amino acid metabolism	Tyrosine metabolism	1	74	0.501198	0.617548	ko00350	Os06t0338700-00(-)	K00276
Genetic Information Processing	Folding, sorting and degradation	Protein export	1	76	0.510534	0.618015	ko03060	Os04t0623700-01(-)	K03104
Metabolism	Lipid metabolism	Fatty acid degradation	1	80	0.528693	0.628963	ko00071	Os03t0310400-01(-)	K01692
Metabolism	Lipid metabolism	alpha-Linolenic acid metabolism	1	84	0.546188	0.638762	ko00592	Os03t0810900-01(OspPLAIVbeta)	K14674
Genetic Information Processing	Translation	Aminoacyl-tRNA biosynthesis	1	90	0.571236	0.656921	ko00970	Os10t0182000-01(-)	K01872
Genetic Information Processing	Replication and repair	Nucleotide excision repair	1	102	0.617313	0.698272	ko03420	Os10t0574500-00(-)	K10756
Genetic Information Processing	Translation	Ribosome biogenesis in eukaryotes	1	126	0.695315	0.773818	ko03008	Os03t0343300-01(-)	K14567
Environmental Information Processing	Signal transduction	MAPK signaling pathway - plant	2	265	0.712795	0.78068	ko04016	Os03t0131200-01(CATC);Os03t0131200-02(CATC)	K03781+K03781
Metabolism	Global and overview maps	Carbon metabolism	3	461	0.811994	0.866056	ko01200	Os03t0131200-01(CATC);Os03t0131200-02(CATC);Os03t0672300-01(-)	K03781+K03781+K00873
Genetic Information Processing	Folding, sorting and degradation	RNA degradation	1	186	0.828228	0.866056	ko03018	Os11t0176200-01(OsDSHCT)	K12598
Organismal Systems	Environmental adaptation	Plant-pathogen interaction	2	337	0.828402	0.866056	ko04626	Os04t0471700-00(OsWRKY35);Os04t0514600-00(-)	K18835+K13459
Metabolism	Carbohydrate metabolism	Glycolysis / Gluconeogenesis	1	224	0.880806	0.907099	ko00010	Os03t0672300-01(-)	K00873
Genetic Information Processing	Translation	RNA transport	1	290	0.937102	0.950883	ko03013	Os02t0139200-01(OsPRMT5)	K02516
Genetic Information Processing	Folding, sorting and degradation	Protein processing in endoplasmic reticulum	1	345	0.963243	0.963243	ko04141	Os06t0219500-00(-)	K13993

## Sheet:  ZJ22b-vs-zj-esb
All enrichment KEGG terms of target of miRNAs between ZJ22b and zj-esb in the comparison.
KEGG_A_class	KEGG_B_class	Pathway	ZJ22b-vs-Pir1b (251)	All (7519)	Pvalue	Qvalue	Pathway ID	Genes	K_IDs
Metabolism	Biosynthesis of other secondary metabolites	Phenylpropanoid biosynthesis	28	323	2.93155e-06	0.00030195	ko00940	Os06t0306300-01(prx78);Os03t0369000-01(PRX46);Os01t0327100-01(prx15);Os01t0327100-02(prx15);Os09t0422000-01(HCT3);Os01t0591300-01(OsALDH2C1);Os10t0109300-01(PRX125);Os10t0109300-02(PRX125);Os02t0626400-01(OsPAL);Os01t0930800-01(Os1bglu5);Os08t0498600-02(ROMT-27);Os08t0498600-01(ROMT-27);Os06t0547400-01(prx86);Os02t0235900-01(-);Os04t0688200-01(prx60);Os05t0365600-01(Os5bglu19);Os07t0639400-01(prx…	K00430+K00430+K00430+K00430+K13065+K12355+K00430+K00430+K10775+K01188+K00588+K00588+K00430+K22395+K00430+K01188+K00430+K00430+K05349+K05349+K05349+K00430+K00430+K01904+K01904+K00430+K00430+K00430
Metabolism	Global and overview maps	Biosynthesis of secondary metabolites	93	2022	0.000218666	0.0082574	ko01110	Os07t0412100-01(GBSSII);Os07t0412100-02(GBSSII);Os06t0306300-01(prx78);Os03t0181500-01(ONI1);Os04t0664900-01(OsCIN5);Os03t0369000-01(PRX46);Os01t0327100-01(prx15);Os01t0327100-02(prx15);Os09t0422000-01(HCT3);Os09t0403300-00(CYP735A4);Os12t0563000-00(GPAT);Os10t0109300-01(PRX125);Os10t0109300-02(PRX125);Os11t0530600-01(CHS*);Os02t0626400-01(OsPAL);Os09t0457400-01(Amy3A/B/C*(RAmy3A/B/C));Os08t01313…	K13679+K13679+K00430+K15397+K01193+K00430+K00430+K00430+K13065+K10717+K13508+K00430+K00430+K00660+K10775+K01176+K13508+K13051+K13051+K01188+K03781+K03781+K01115+K06001+K06001+K01187+K01177+K00318+K00588+K00588+K00167+K00167+K00286+K00286+K15227+K00430+K00620+K00620+K00276+K22395+K00430+K09832+K01900+K01640+K00454+K00454+K00454+K00454+K01188+K01599+K00587+K01695+K00430+K13811+K09842+K08695+K01807+…
Metabolism	Carbohydrate metabolism	Starch and sucrose metabolism	21	269	0.000240507	0.0082574	ko00500	Os07t0412100-01(GBSSII);Os07t0412100-02(GBSSII);Os04t0664900-01(OsCIN5);Os09t0457400-01(Amy3A/B/C*(RAmy3A/B/C));Os01t0930800-01(Os1bglu5);Os07t0421300-01(-);Os02t0129600-01(-);Os09t0530200-01(OsGH9B14);Os05t0365600-01(Os5bglu19);Os03t0374600-01(-);Os03t0374600-02(-);Os02t0733300-01(OsGH9B1);Os03t0749300-03(OsBGLU1);Os03t0749300-01(OsBGLU1);Os03t0749300-02(OsBGLU1);Os01t0720600-03(SSIVA);Os01t0720…	K13679+K13679+K01193+K01176+K01188+K01187+K01177+K01179+K01188+K19892+K19892+K01179+K05349+K05349+K05349+K00703+K00703+K00703+K00703+K01193+K01193
Metabolism	Global and overview maps	Metabolic pathways	143	3546	0.000962904	0.0247948	ko01100	Os07t0412100-01(GBSSII);Os07t0412100-02(GBSSII);Os06t0306300-01(prx78);Os03t0181500-01(ONI1);Os03t0378000-01(-);Os04t0664900-01(OsCIN5);Os10t0492900-01(-);Os09t0528700-00(OsCYP76M7);Os03t0369000-01(PRX46);Os01t0327100-01(prx15);Os01t0327100-02(prx15);Os03t0595600-00(OsGSTU43);Os09t0422000-01(HCT3);Os09t0403300-00(CYP735A4);Os12t0563000-00(GPAT);Os10t0109300-01(PRX125);Os10t0109300-02(PRX125);Os11…	K13679+K13679+K00430+K15397+K01510+K01193+K07407+K07408+K00430+K00430+K00430+K00799+K13065+K10717+K13508+K00430+K00430+K00660+K01728+K05284+K00387+K10775+K01937+K01103+K01103+K01176+K13508+K13051+K13051+K01188+K07408+K03781+K03781+K01115+K02150+K06001+K06001+K01187+K01177+K00318+K00588+K00588+K01184+K01759+K01759+K01759+K01759+K00913+K00167+K00167+K01213+K00286+K00286+K15227+K00430+K00620+K00620+…
Metabolism	Lipid metabolism	Linoleic acid metabolism	5	30	0.0028635	0.058988	ko00591	Os02t0194700-01(OsLOX1);Os02t0194700-02(OsLOX1);Os05t0304600-02(OsLOX7);Os05t0304600-01(OsLOX7);Os03t0810900-01(OspPLAIVbeta)	K00454+K00454+K00454+K00454+K14674
Metabolism	Carbohydrate metabolism	Pentose and glucuronate interconversions	9	96	0.00459862	0.0789429	ko00040	Os06t0144900-01(-);Os11t0249400-00(OsPGL12);Os06t0545400-01(OsPGL1);Os06t0611400-01(OsPGL5);Os07t0691100-01(OsPME23);Os06t0545800-01(OsPGL8);Os06t0545200-00(OsPGL10);Os06t0509600-00(-);Os01t0172900-00(PG)	K01728+K01184+K01213+K01213+K01051+K01213+K01213+K01213+K01184
Organismal Systems	Environmental adaptation	Circadian rhythm - plant	7	73	0.0106123	0.156152	ko04712	Os03t0309200-01(PHYB);Os03t0309200-02(PHYB);Os11t0530600-01(CHS*);Os03t0719800-01(PHYA);Os01t0566100-01(OsELF3.2);Os01t0566100-02(OsELF3.2);Os03t0752100-01(PHYC)	K12121+K12121+K00660+K12120+K12125+K12125+K12120
Cellular Processes	Transport and catabolism	Endocytosis	15	249	0.0193151	0.248682	ko04144	Os12t0104766-00(-);Os05t0171000-01(OsPLDalpha2);Os02t0198300-01(-);Os02t0198300-02(-);Os04t0117300-02(-);Os02t0822500-04(-);Os02t0822500-03(-);Os02t0822500-01(-);Os03t0381200-02(-);Os03t0381200-01(-);Os08t0175200-02(-);Os08t0175200-01(-);Os11t0104866-00(-);Os03t0356596-01(-);Os02t0120200-01(OsPLDkappa)	K04646+K01115+K12486+K12486+K18443+K00889+K00889+K00889+K10365+K10365+K19476+K19476+K04646+K00889+K01115
Metabolism	Carbohydrate metabolism	Inositol phosphate metabolism	8	109	0.0289504	0.314868	ko00562	Os03t0230500-01(DSM3);Os02t0822500-04(-);Os02t0822500-03(-);Os02t0822500-01(-);Os06t0561000-01(OsMIOX);Os10t0369900-01(OsINO2);Os03t0356596-01(-);Os08t0428900-01(-)	K00913+K00889+K00889+K00889+K00469+K01858+K00889+K00921
Metabolism	Lipid metabolism	Steroid biosynthesis	5	54	0.0333535	0.314868	ko00100	Os01t0211000-00(-);Os03t0810900-01(OspPLAIVbeta);Os03t0136200-01(Ossmt2-1);Os03t0231700-02(-);Os03t0231700-01(-)	K09832+K14674+K08242+K00511+K00511
Metabolism	Metabolism of other amino acids	Cyanoamino acid metabolism	7	92	0.0336267	0.314868	ko00460	Os04t0650700-03(OsASNase2);Os04t0650700-01(OsASNase2);Os01t0930800-01(Os1bglu5);Os05t0365600-01(Os5bglu19);Os03t0749300-03(OsBGLU1);Os03t0749300-01(OsBGLU1);Os03t0749300-02(OsBGLU1)	K13051+K13051+K01188+K01188+K05349+K05349+K05349
Metabolism	Carbohydrate metabolism	Galactose metabolism	6	82	0.0555847	0.444975	ko00052	Os04t0664900-01(OsCIN5);Os10t0492900-01(-);Os07t0421300-01(-);Os07t0209100-01(-);Os04t0535600-01(OSINV2);Os04t0535600-02(OSINV2)	K01193+K07407+K01187+K06617+K01193+K01193
Metabolism	Amino acid metabolism	Tryptophan metabolism	7	103	0.0561619	0.444975	ko00380	Os09t0528700-00(OsCYP76M7);Os06t0328900-01(-);Os03t0131200-01(CATC);Os03t0131200-02(CATC);Os10t0515200-01(-);Os04t0128900-01(YUCCA7);Os08t0152300-00(-)	K07408+K07408+K03781+K03781+K07408+K11816+K07408
Metabolism	Lipid metabolism	Glycerolipid metabolism	8	135	0.0817633	0.583911	ko00561	Os10t0492900-01(-);Os12t0563000-00(GPAT);Os08t0131300-00(GPAT);Os11t0683500-01(Os11bglu36);Os11t0683500-02(Os11bglu36);Os02t0539100-01(-);Os03t0810900-01(OspPLAIVbeta);Os01t0782500-01(-)	K07407+K13508+K13508+K21362+K21362+K09480+K14674+K13513
Metabolism	Lipid metabolism	Sphingolipid metabolism	4	51	0.0895575	0.583911	ko00600	Os10t0492900-01(-);Os01t0928800-01(OsLCB2a1);Os06t0330400-00(-);Os02t0806900-01(-)	K07407+K00654+K04713+K00654
Metabolism	Biosynthesis of other secondary metabolites	Flavonoid biosynthesis	5	72	0.091904	0.583911	ko00941	Os09t0422000-01(HCT3);Os11t0530600-01(CHS*);Os08t0498600-02(ROMT-27);Os08t0498600-01(ROMT-27);Os04t0630600-00(OsSTA134)	K13065+K00660+K00588+K00588+K08695
Metabolism	Biosynthesis of other secondary metabolites	Stilbenoid, diarylheptanoid and gingerol biosynthesis	3	33	0.0963736	0.583911	ko00945	Os09t0422000-01(HCT3);Os08t0498600-02(ROMT-27);Os08t0498600-01(ROMT-27)	K13065+K00588+K00588
Metabolism	Glycan biosynthesis and metabolism	Glycosylphosphatidylinositol(GPI)-anchor biosynthesis	3	34	0.103221	0.590651	ko00563	Os03t0670200-01(-);Os01t0907300-01(-);Os01t0907300-02(-)	K05284+K05291+K05291
Metabolism	Biosynthesis of other secondary metabolites	Monobactam biosynthesis	2	19	0.130978	0.710041	ko00261	Os03t0743900-01(OsATPS);Os03t0850400-01(-)	K13811+K00928
Metabolism	Lipid metabolism	alpha-Linolenic acid metabolism	5	84	0.148675	0.765676	ko00592	Os02t0194700-01(OsLOX1);Os02t0194700-02(OsLOX1);Os05t0304600-02(OsLOX7);Os05t0304600-01(OsLOX7);Os03t0810900-01(OspPLAIVbeta)	K00454+K00454+K00454+K00454+K14674
Metabolism	Global and overview maps	2-Oxocarboxylic acid metabolism	5	88	0.170292	0.787779	ko01210	Os03t0279400-02(-);Os03t0279400-01(-);Os01t0276100-01(OsIDHa);Os03t0850400-01(-);Os02t0608550-00(-)	K00620+K00620+K00030+K00928+K01653
Metabolism	Metabolism of terpenoids and polyketides	Zeatin biosynthesis	3	43	0.172302	0.787779	ko00908	Os09t0403300-00(CYP735A4);Os08t0429800-00(CYP735A3);Os01t0688300-00(OsIPT8)	K10717+K10717+K10760
Environmental Information Processing	Signal transduction	Phosphatidylinositol signaling system	6	115	0.185856	0.787779	ko04070	Os03t0230500-01(DSM3);Os02t0822500-04(-);Os02t0822500-03(-);Os02t0822500-01(-);Os03t0356596-01(-);Os08t0428900-01(-)	K00913+K00889+K00889+K00889+K00889+K00921
Metabolism	Metabolism of terpenoids and polyketides	Sesquiterpenoid and triterpenoid biosynthesis	2	24	0.190225	0.787779	ko00909	Os03t0231700-02(-);Os03t0231700-01(-)	K00511+K00511
Metabolism	Amino acid metabolism	Phenylalanine, tyrosine and tryptophan biosynthesis	4	70	0.205129	0.787779	ko00400	Os06t0632200-02(TS);Os06t0632200-01(TS);Os06t0542200-01(-);Os03t0797000-01(-)	K06001+K06001+K15227+K01695
Metabolism	Carbohydrate metabolism	Propanoate metabolism	3	47	0.20635	0.787779	ko00640	Os07t0170100-01(-);Os07t0170100-02(-);Os02t0621700-01(-)	K00167+K00167+K01900
Metabolism	Amino acid metabolism	Glycine, serine and threonine metabolism	6	119	0.206505	0.787779	ko00260	Os06t0632200-02(TS);Os06t0632200-01(TS);Os07t0572100-01(DAO);Os03t0797000-01(-);Os06t0338700-00(-);Os03t0850400-01(-)	K06001+K06001+K00276+K01695+K00276+K00928
Metabolism	Lipid metabolism	Ether lipid metabolism	3	49	0.223913	0.816812	ko00565	Os05t0171000-01(OsPLDalpha2);Os03t0810900-01(OspPLAIVbeta);Os02t0120200-01(OsPLDkappa)	K01115+K14674+K01115
Metabolism	Lipid metabolism	Glycerophospholipid metabolism	8	175	0.229976	0.816812	ko00564	Os12t0563000-00(GPAT);Os08t0131300-00(GPAT);Os04t0394100-00(-);Os05t0171000-01(OsPLDalpha2);Os03t0810900-01(OspPLAIVbeta);Os02t0120200-01(OsPLDkappa);Os05t0535400-00(-);Os01t0782500-01(-)	K13508+K13508+K18696+K01115+K14674+K01115+K14156+K13513
Genetic Information Processing	Replication and repair	DNA replication	4	83	0.300328	0.966786	ko03030	Os10t0574500-00(-);Os12t0242900-01(-);Os01t0204000-02(-);Os01t0204000-01(-)	K10756+K02321+K03504+K03504
Metabolism	Lipid metabolism	Synthesis and degradation of ketone bodies	1	11	0.311834	0.966786	ko00072	Os01t0269000-01(-)	K01640
Genetic Information Processing	Transcription	RNA polymerase	3	59	0.314843	0.966786	ko03020	Os04t0492300-01(-);Os05t0151000-00(-);Os01t0183400-01(OsNF-YC13)	K03018+K03006+K03004
Genetic Information Processing	Translation	Aminoacyl-tRNA biosynthesis	4	90	0.353704	0.966786	ko00970	Os08t0150800-01(-);Os01t0687500-01(-);Os08t0320000-01(-);Os10t0182000-01(-)	K01866+K00604+K01866+K01872
Metabolism	Carbohydrate metabolism	C5-Branched dibasic acid metabolism	1	13	0.35708	0.966786	ko00660	Os02t0608550-00(-)	K01653
Metabolism	Metabolism of cofactors and vitamins	Ubiquinone and other terpenoid-quinone biosynthesis	3	64	0.360927	0.966786	ko00130	Os12t0181300-00(-);Os06t0656500-01(4CL4);Os06t0656500-02(4CL4)	K12501+K01904+K01904
Metabolism	Glycan biosynthesis and metabolism	Glycosphingolipid biosynthesis - globo and isoglobo series	1	14	0.378579	0.966786	ko00603	Os10t0492900-01(-)	K07407
Genetic Information Processing	Replication and repair	Mismatch repair	3	66	0.379261	0.966786	ko03430	Os10t0574500-00(-);Os01t0204000-02(-);Os01t0204000-01(-)	K10756+K03504+K03504
Metabolism	Amino acid metabolism	Arginine and proline metabolism	4	95	0.391916	0.966786	ko00330	Os10t0550900-01(OsProDH);Os01t0948400-02(OsP5CR);Os01t0948400-01(OsP5CR);Os01t0710200-01(PAO1)	K00318+K00286+K00286+K12259
Genetic Information Processing	Folding, sorting and degradation	Proteasome	4	95	0.391916	0.966786	ko03050	Os02t0133800-01(OsPAF1);Os02t0634900-01(PAB2);Os06t0699900-01(OsRpn1b);Os06t0301300-00(-)	K02725+K02726+K03028+K06699
Metabolism	Biosynthesis of other secondary metabolites	Isoquinoline alkaloid biosynthesis	2	41	0.399798	0.966786	ko00950	Os07t0572100-01(DAO);Os06t0338700-00(-)	K00276+K00276
Genetic Information Processing	Replication and repair	Homologous recombination	4	99	0.422264	0.966786	ko03440	Os02t0497500-01(Rad50);Os01t0106700-00(-);Os01t0204000-02(-);Os01t0204000-01(-)	K10866+K04728+K03504+K03504
Metabolism	Carbohydrate metabolism	Butanoate metabolism	2	43	0.423257	0.966786	ko00650	Os01t0269000-01(-);Os02t0608550-00(-)	K01640+K01653
Metabolism	Metabolism of terpenoids and polyketides	Carotenoid biosynthesis	2	43	0.423257	0.966786	ko00906	Os07t0282300-01(OsAAO3);Os04t0448950-01(-)	K09842+K09838
Metabolism	Amino acid metabolism	Valine, leucine and isoleucine degradation	3	73	0.442339	0.966786	ko00280	Os07t0170100-01(-);Os07t0170100-02(-);Os01t0269000-01(-)	K00167+K00167+K01640
Metabolism	Amino acid metabolism	Phenylalanine metabolism	3	74	0.451162	0.966786	ko00360	Os02t0626400-01(OsPAL);Os07t0572100-01(DAO);Os06t0338700-00(-)	K10775+K00276+K00276
Metabolism	Metabolism of other amino acids	beta-Alanine metabolism	3	74	0.451162	0.966786	ko00410	Os07t0572100-01(DAO);Os01t0710200-01(PAO1);Os06t0338700-00(-)	K00276+K12259+K00276
Metabolism	Metabolism of cofactors and vitamins	Porphyrin and chlorophyll metabolism	3	74	0.451162	0.966786	ko00860	Os01t0622300-01(HEME);Os10t0389300-02(OsRCCR2);Os10t0389300-01(OsRCCR2)	K01599+K13545+K13545
Genetic Information Processing	Replication and repair	Non-homologous end-joining	1	18	0.457648	0.966786	ko03450	Os02t0497500-01(Rad50)	K10866
Genetic Information Processing	Transcription	Basal transcription factors	3	75	0.459927	0.966786	ko03022	Os01t0680400-01(-);Os09t0534800-01(OsTFIIB);Os09t0534800-02(OsTFIIB)	K03135+K03124+K03124
Metabolism	Energy metabolism	Sulfur metabolism	2	48	0.479724	0.988231	ko00920	Os08t0530400-01(OSMCP);Os03t0743900-01(OsATPS)	K00387+K13811
Metabolism	Biosynthesis of other secondary metabolites	Tropane, piperidine and pyridine alkaloid biosynthesis	2	50	0.501351	0.999999	ko00960	Os07t0572100-01(DAO);Os06t0338700-00(-)	K00276+K00276
Genetic Information Processing	Folding, sorting and degradation	Sulfur relay system	1	21	0.510298	0.999999	ko04122	Os12t0588900-01(-)	K14169
Metabolism	Nucleotide metabolism	Purine metabolism	5	143	0.522659	0.999999	ko00230	Os03t0378000-01(-);Os07t0661000-01(-);Os03t0743900-01(OsATPS);Os03t0320900-01(V2);Os05t0349200-01(-)	K01510+K01488+K13811+K00942+K01490
Metabolism	Amino acid metabolism	Lysine biosynthesis	1	22	0.526691	0.999999	ko00300	Os03t0850400-01(-)	K00928
Metabolism	Lipid metabolism	Arachidonic acid metabolism	1	24	0.557855	0.999999	ko00590	Os03t0810900-01(OspPLAIVbeta)	K14674
Metabolism	Metabolism of cofactors and vitamins	Biotin metabolism	1	24	0.557855	0.999999	ko00780	Os05t0435700-01(-)	K02372
Metabolism	Amino acid metabolism	Arginine biosynthesis	2	56	0.562665	0.999999	ko00220	Os03t0279400-02(-);Os03t0279400-01(-)	K00620+K00620
Metabolism	Global and overview maps	Biosynthesis of amino acids	12	369	0.580402	0.999999	ko01230	Os06t0632200-02(TS);Os06t0632200-01(TS);Os01t0948400-02(OsP5CR);Os01t0948400-01(OsP5CR);Os06t0542200-01(-);Os03t0279400-02(-);Os03t0279400-01(-);Os03t0797000-01(-);Os04t0306400-01(OsRPI);Os01t0276100-01(OsIDHa);Os03t0850400-01(-);Os02t0608550-00(-)	K06001+K06001+K00286+K00286+K15227+K00620+K00620+K01695+K01807+K00030+K00928+K01653
Metabolism	Metabolism of terpenoids and polyketides	Diterpenoid biosynthesis	2	60	0.600455	0.999999	ko00904	Os03t0650200-00(-);Os07t0594966-00(-)	K22639+K22639
Genetic Information Processing	Folding, sorting and degradation	Protein processing in endoplasmic reticulum	11	345	0.607086	0.999999	ko04141	Os10t0542200-01(-);Os03t0267000-00(OsHSP18.0-CI);Os03t0266900-02(OsHsp17.3);Os11t0199200-02(ESP2);Os11t0199200-01(ESP2);Os06t0219500-00(-);Os03t0742800-01(-);Os03t0742800-02(-);Os03t0131300-01(-);Os03t0131300-02(-);Os03t0245800-02(OsHSP26)	K04523+K13993+K13993+K09580+K09580+K13993+K14006+K14006+K04523+K04523+K13993
Metabolism	Metabolism of other amino acids	Selenocompound metabolism	1	29	0.627112	0.999999	ko00450	Os03t0743900-01(OsATPS)	K13811
Genetic Information Processing	Replication and repair	Base excision repair	2	63	0.627154	0.999999	ko03410	Os01t0204000-02(-);Os01t0204000-01(-)	K03504+K03504
Metabolism	Amino acid metabolism	Valine, leucine and isoleucine biosynthesis	1	31	0.651687	0.999999	ko00290	Os02t0608550-00(-)	K01653
Metabolism	Metabolism of cofactors and vitamins	One carbon pool by folate	1	32	0.663362	0.999999	ko00670	Os01t0687500-01(-)	K00604
Genetic Information Processing	Replication and repair	Nucleotide excision repair	3	102	0.667639	0.999999	ko03420	Os10t0574500-00(-);Os01t0204000-02(-);Os01t0204000-01(-)	K10756+K03504+K03504
Genetic Information Processing	Transcription	Spliceosome	9	301	0.681109	0.999999	ko03040	Os12t0572300-01(-);Os01t0686600-01(-);Os12t0572400-02(-);Os12t0572400-01(-);Os01t0265800-02(RBP-P);Os01t0265800-01(RBP-P);Os06t0218000-00(OsSKIPb);Os08t0107900-02(OsMAGO1);Os08t0107900-01(OsMAGO1)	K12900+K12867+K12900+K12900+K12741+K12741+K06063+K12877+K12877
Organismal Systems	Environmental adaptation	Plant-pathogen interaction	10	337	0.69527	0.999999	ko04626	Os03t0181500-01(ONI1);Os04t0470500-00(-);Os04t0618700-01(Os-FLS2);Os04t0471700-00(OsWRKY35);Os04t0514600-00(-);Os12t0163100-00(OsCNGC16);Os11t0569733-00(-);Os11t0136600-00(OsCDPK25);Os09t0479600-01(-);Os12t0133500-00(OsCDPK26)	K15397+K13459+K13420+K18835+K13459+K05391+K13437+K13412+K13457+K13412
Metabolism	Amino acid metabolism	Tyrosine metabolism	2	74	0.713252	0.999999	ko00350	Os07t0572100-01(DAO);Os06t0338700-00(-)	K00276+K00276
Genetic Information Processing	Folding, sorting and degradation	Protein export	2	76	0.726991	0.999999	ko03060	Os01t0321300-00(-);Os04t0623700-01(-)	K03070+K03104
Metabolism	Carbohydrate metabolism	Ascorbate and aldarate metabolism	2	79	0.746556	0.999999	ko00053	Os05t0485800-00(-);Os06t0561000-01(OsMIOX)	K00423+K00469
Metabolism	Metabolism of cofactors and vitamins	Pantothenate and CoA biosynthesis	1	41	0.752368	0.999999	ko00770	Os02t0608550-00(-)	K01653
Genetic Information Processing	Translation	RNA transport	8	290	0.759324	0.999999	ko03013	Os10t0467600-01(p28);Os02t0139200-01(OsPRMT5);Os06t0338900-01(-);Os03t0172000-02(MOS3/SAR3);Os03t0172000-01(MOS3/SAR3);Os01t0583700-00(OsSTA17);Os08t0107900-02(OsMAGO1);Os08t0107900-01(OsMAGO1)	K03259+K02516+K03241+K14297+K14297+K03243+K12877+K12877
Metabolism	Carbohydrate metabolism	Pyruvate metabolism	4	154	0.761911	0.999999	ko00620	Os08t0191700-01(GLYI-11);Os08t0191700-02(GLYI-11);Os08t0191700-03(GLYI-11);Os08t0191700-04(GLYI-11)	K01759+K01759+K01759+K01759
Metabolism	Metabolism of terpenoids and polyketides	Terpenoid backbone biosynthesis	2	82	0.764909	0.999999	ko00900	Os04t0602900-02(-);Os06t0678200-01(OsSPS1)	K00587+K14066
Metabolism	Amino acid metabolism	Alanine, aspartate and glutamate metabolism	2	84	0.776497	0.999999	ko00250	Os04t0650700-03(OsASNase2);Os04t0650700-01(OsASNase2)	K13051+K13051
Metabolism	Nucleotide metabolism	Pyrimidine metabolism	2	86	0.787584	0.999999	ko00240	Os03t0378000-01(-);Os05t0570400-00(-)	K01510+K01937
Metabolism	Glycan biosynthesis and metabolism	Various types of N-glycan biosynthesis	1	46	0.791239	0.999999	ko00513	Os06t0245700-00(-)	K01231
Genetic Information Processing	Translation	Ribosome biogenesis in eukaryotes	3	126	0.797921	0.999999	ko03008	Os03t0343300-01(-);Os02t0543300-00(-);Os03t0735100-01(OsWD40-87)	K14567+K14536+K14548
Metabolism	Carbohydrate metabolism	Citrate cycle (TCA cycle)	2	88	0.798186	0.999999	ko00020	Os02t0621700-01(-);Os01t0276100-01(OsIDHa)	K01900+K00030
Metabolism	Lipid metabolism	Fatty acid elongation	1	51	0.824029	0.999999	ko00062	Os03t0181500-01(ONI1)	K15397
Genetic Information Processing	Folding, sorting and degradation	SNARE interactions in vesicular transport	1	54	0.841185	0.999999	ko04130	Os11t0168100-01(-)	K08500
Cellular Processes	Transport and catabolism	Peroxisome	3	140	0.852135	0.999999	ko04146	Os03t0131200-01(CATC);Os03t0131200-02(CATC);Os01t0269000-01(-)	K03781+K03781+K01640
Metabolism	Carbohydrate metabolism	Fructose and mannose metabolism	2	102	0.860122	0.999999	ko00051	Os03t0294200-01(OsF2KP2);Os03t0294200-02(OsF2KP2)	K01103+K01103
Metabolism	Lipid metabolism	Fatty acid biosynthesis	1	58	0.861495	0.999999	ko00061	Os05t0435700-01(-)	K02372
Environmental Information Processing	Membrane transport	ABC transporters	1	59	0.866154	0.999999	ko02010	Os02t0693700-02(OsABCB11)	K05658
Genetic Information Processing	Translation	mRNA surveillance pathway	4	191	0.886627	0.999999	ko03015	Os08t0107900-02(OsMAGO1);Os08t0107900-01(OsMAGO1);Os08t0305300-02(-);Os08t0305300-01(-)	K12877+K12877+K14409+K14409
Metabolism	Amino acid metabolism	Lysine degradation	1	64	0.887212	0.999999	ko00310	Os07t0435900-01(OsSET25)	K11420
Metabolism	Glycan biosynthesis and metabolism	N-Glycan biosynthesis	1	64	0.887212	0.999999	ko00510	Os06t0245700-00(-)	K01231
Genetic Information Processing	Folding, sorting and degradation	Ubiquitin mediated proteolysis	4	201	0.908619	0.999999	ko04120	Os12t0626300-01(APC5);Os05t0153132-00(OsUBC36);Os05t0152900-00(-);Os01t0122200-01(-)	K03352+K10581+K04506+K04506
Cellular Processes	Transport and catabolism	Phagosome	2	129	0.93327	0.999999	ko04145	Os01t0222500-01(-);Os08t0428900-01(-)	K02150+K00921
Metabolism	Carbohydrate metabolism	Glyoxylate and dicarboxylate metabolism	2	135	0.943663	0.999999	ko00630	Os03t0131200-01(CATC);Os03t0131200-02(CATC)	K03781+K03781
Metabolism	Carbohydrate metabolism	Pentose phosphate pathway	1	91	0.955336	0.999999	ko00030	Os04t0306400-01(OsRPI)	K01807
Metabolism	Energy metabolism	Oxidative phosphorylation	3	192	0.958316	0.999999	ko00190	Os01t0222500-01(-);Os05t0114000-01(-);Os12t0422971-00(-)	K02150+K01507+K03936
Environmental Information Processing	Signal transduction	Plant hormone signal transduction	7	375	0.970942	0.999999	ko04075	Os12t0138500-01(-);Os03t0265500-01(OsCOI2);Os03t0265500-02(OsCOI2);Os11t0141900-00(-);Os04t0673300-01(RR6);Os01t0741900-01(IAA6);Os04t0604900-01(OsXTH16)	K14508+K13463+K13463+K14508+K14492+K14484+K14504
Metabolism	Global and overview maps	Fatty acid metabolism	1	111	0.977562	0.999999	ko01212	Os05t0435700-01(-)	K02372
Environmental Information Processing	Signal transduction	MAPK signaling pathway - plant	4	265	0.979571	0.999999	ko04016	Os03t0178100-00(OsHMA6);Os04t0618700-01(Os-FLS2);Os03t0131200-01(CATC);Os03t0131200-02(CATC)	K17686+K13420+K03781+K03781
Metabolism	Amino acid metabolism	Cysteine and methionine metabolism	2	182	0.985715	0.999999	ko00270	Os05t0149400-01(ACO5);Os03t0850400-01(-)	K05933+K00928
Genetic Information Processing	Folding, sorting and degradation	RNA degradation	2	186	0.987329	0.999999	ko03018	Os11t0176200-01(OsDSHCT);Os12t0156400-01(-)	K12598+K12611
Metabolism	Energy metabolism	Carbon fixation in photosynthetic organisms	1	152	0.994561	0.999999	ko00710	Os04t0306400-01(OsRPI)	K01807
Metabolism	Metabolism of other amino acids	Glutathione metabolism	1	161	0.996019	0.999999	ko00480	Os03t0595600-00(OsGSTU43)	K00799
Metabolism	Global and overview maps	Carbon metabolism	5	461	0.999587	0.999999	ko01200	Os03t0131200-01(CATC);Os03t0131200-02(CATC);Os02t0621700-01(-);Os04t0306400-01(OsRPI);Os01t0276100-01(OsIDHa)	K03781+K03781+K01900+K01807+K00030
Metabolism	Carbohydrate metabolism	Amino sugar and nucleotide sugar metabolism	1	226	0.999587	0.999999	ko00520	Os05t0488900-01(-)	K00326
Genetic Information Processing	Translation	Ribosome	1	403	0.999999	0.999999	ko03010	Os01t0328400-01(RPS27a)	K02977

## Sheet:  ZJ22c-vs-zj-esc
All enrichment KEGG terms of target of miRNAs between ZJ22c and zj-esc in the comparison.
KEGG_A_class	KEGG_B_class	Pathway	ZJ22c-vs-Pir1c (159)	All (7519)	Pvalue	Qvalue	Pathway ID	Genes	K_IDs
Metabolism	Carbohydrate metabolism	Inositol phosphate metabolism	12	109	2.8142e-06	0.000236393	ko00562	Os03t0826600-01(NPC1);Os03t0826600-02(NPC1);Os12t0141100-01(-);Os12t0141100-02(-);Os07t0658700-01(-);Os03t0230500-01(DSM3);Os02t0822500-04(-);Os02t0822500-03(-);Os02t0822500-01(-);Os11t0145000-01(-);Os06t0561000-01(OsMIOX);Os08t0428900-01(-)	K01114+K01114+K00889+K00889+K00889+K00913+K00889+K00889+K00889+K00889+K00469+K00921
Environmental Information Processing	Signal transduction	Phosphatidylinositol signaling system	10	115	0.000149261	0.00626896	ko04070	Os12t0141100-01(-);Os12t0141100-02(-);Os07t0658700-01(-);Os07t0619200-01(-);Os03t0230500-01(DSM3);Os02t0822500-04(-);Os02t0822500-03(-);Os02t0822500-01(-);Os11t0145000-01(-);Os08t0428900-01(-)	K00889+K00889+K00889+K02183+K00913+K00889+K00889+K00889+K00889+K00921
Genetic Information Processing	Replication and repair	Non-homologous end-joining	4	18	0.000467459	0.0105797	ko03450	Os07t0184900-02(OsKu70);Os07t0184900-01(OsKu70);Os07t0184900-03(OsKu70);Os04t0606450-01(OsLig4)	K10884+K10884+K10884+K10777
Metabolism	Metabolism of cofactors and vitamins	One carbon pool by folate	5	32	0.000503795	0.0105797	ko00670	Os01t0687500-01(-);Os03t0738400-03(OsSHM1);Os03t0738400-01(OsSHM1);Os07t0578600-02(-);Os07t0578600-01(-)	K00604+K00600+K00600+K01934+K01934
Metabolism	Amino acid metabolism	Glycine, serine and threonine metabolism	9	119	0.000895841	0.0150501	ko00260	Os04t0136200-00(OsDAO3);Os07t0108300-01(ALT-2);Os07t0108300-02(ALT-2);Os07t0182100-01(OsTSA);Os03t0797000-01(-);Os02t0593100-00(OsDAO5);Os03t0738400-03(OsSHM1);Os03t0738400-01(OsSHM1);Os03t0850400-01(-)	K00276+K14272+K14272+K01695+K01695+K00276+K00600+K00600+K00928
Cellular Processes	Transport and catabolism	Endocytosis	13	249	0.00230137	0.0322192	ko04144	Os12t0141100-01(-);Os12t0141100-02(-);Os07t0658700-01(-);Os12t0104766-00(-);Os02t0822500-04(-);Os02t0822500-03(-);Os02t0822500-01(-);Os11t0145000-01(-);Os03t0381200-02(-);Os03t0381200-01(-);Os08t0175200-02(-);Os08t0175200-01(-);Os11t0104866-00(-)	K00889+K00889+K00889+K04646+K00889+K00889+K00889+K00889+K10365+K10365+K19476+K19476+K04646
Organismal Systems	Environmental adaptation	Circadian rhythm - plant	6	73	0.00430887	0.0517064	ko04712	Os03t0309200-01(PHYB);Os03t0309200-02(PHYB);Os11t0530600-01(CHS*);Os03t0719800-01(PHYA);Os02t0625000-01(OSCRY2);Os03t0752100-01(PHYC)	K12121+K12121+K00660+K12120+K12119+K12120
Metabolism	Carbohydrate metabolism	Pyruvate metabolism	8	154	0.0161976	0.170075	ko00620	Os08t0191700-01(GLYI-11);Os08t0191700-02(GLYI-11);Os08t0191700-03(GLYI-11);Os08t0191700-04(GLYI-11);Os03t0773800-02(-);Os03t0773800-01(-);Os03t0773800-03(-);Os03t0672300-01(-)	K01759+K01759+K01759+K01759+K00026+K00026+K00026+K00873
Metabolism	Carbohydrate metabolism	Glyoxylate and dicarboxylate metabolism	7	135	0.0240845	0.208378	ko00630	Os07t0108300-01(ALT-2);Os07t0108300-02(ALT-2);Os03t0773800-02(-);Os03t0773800-01(-);Os03t0773800-03(-);Os03t0738400-03(OsSHM1);Os03t0738400-01(OsSHM1)	K14272+K14272+K00026+K00026+K00026+K00600+K00600
Metabolism	Lipid metabolism	Linoleic acid metabolism	3	30	0.0248069	0.208378	ko00591	Os05t0304600-02(OsLOX7);Os05t0304600-01(OsLOX7);Os03t0810900-01(OspPLAIVbeta)	K00454+K00454+K14674
Metabolism	Lipid metabolism	alpha-Linolenic acid metabolism	5	84	0.0322016	0.245903	ko00592	Os05t0304600-02(OsLOX7);Os05t0304600-01(OsLOX7);Os03t0810900-01(OspPLAIVbeta);Os03t0438100-02(AOC);Os03t0438100-01(AOC)	K00454+K00454+K14674+K10525+K10525
Metabolism	Carbohydrate metabolism	Citrate cycle (TCA cycle)	5	88	0.0382422	0.267696	ko00020	Os02t0621700-01(-);Os03t0773800-02(-);Os03t0773800-01(-);Os03t0773800-03(-);Os01t0276100-01(OsIDHa)	K01900+K00026+K00026+K00026+K00030
Metabolism	Metabolism of other amino acids	Cyanoamino acid metabolism	5	92	0.0449336	0.290242	ko00460	Os04t0650700-03(OsASNase2);Os04t0650700-01(OsASNase2);Os05t0365600-01(Os5bglu19);Os03t0738400-03(OsSHM1);Os03t0738400-01(OsSHM1)	K13051+K13051+K01188+K00600+K00600
Metabolism	Global and overview maps	Biosynthesis of amino acids	13	369	0.0483737	0.290242	ko01230	Os01t0948400-02(OsP5CR);Os01t0948400-01(OsP5CR);Os06t0542200-01(-);Os07t0108300-01(ALT-2);Os07t0108300-02(ALT-2);Os07t0182100-01(OsTSA);Os03t0797000-01(-);Os03t0738400-03(OsSHM1);Os03t0738400-01(OsSHM1);Os04t0306400-01(OsRPI);Os01t0276100-01(OsIDHa);Os03t0672300-01(-);Os03t0850400-01(-)	K00286+K00286+K15227+K14272+K14272+K01695+K01695+K00600+K00600+K01807+K00030+K00873+K00928
Metabolism	Carbohydrate metabolism	Starch and sucrose metabolism	10	269	0.0586294	0.328325	ko00500	Os09t0457400-01(Amy3A/B/C*(RAmy3A/B/C));Os07t0421300-01(-);Os02t0129600-01(-);Os03t0758100-01(Pho1);Os05t0365600-01(Os5bglu19);Os02t0733300-01(OsGH9B1);Os02t0744700-02(OsSSIIb);Os02t0744700-01(OsSSIIb);Os04t0535600-01(OSINV2);Os04t0535600-02(OSINV2)	K01176+K01187+K01177+K00688+K01188+K01179+K00703+K00703+K01193+K01193
Metabolism	Metabolism of other amino acids	beta-Alanine metabolism	4	74	0.0710335	0.372926	ko00410	Os03t0851800-01(PANC);Os03t0851800-02(PANC);Os04t0136200-00(OsDAO3);Os02t0593100-00(OsDAO5)	K01918+K01918+K00276+K00276
Metabolism	Carbohydrate metabolism	Propanoate metabolism	3	47	0.0766133	0.37856	ko00640	Os07t0170100-01(-);Os07t0170100-02(-);Os02t0621700-01(-)	K00167+K00167+K01900
Metabolism	Lipid metabolism	Ether lipid metabolism	3	49	0.0844849	0.394263	ko00565	Os03t0826600-01(NPC1);Os03t0826600-02(NPC1);Os03t0810900-01(OspPLAIVbeta)	K01114+K01114+K14674
Metabolism	Amino acid metabolism	Alanine, aspartate and glutamate metabolism	4	84	0.101746	0.431441	ko00250	Os04t0650700-03(OsASNase2);Os04t0650700-01(OsASNase2);Os07t0108300-01(ALT-2);Os07t0108300-02(ALT-2)	K13051+K13051+K14272+K14272
Metabolism	Energy metabolism	Carbon fixation in photosynthetic organisms	6	152	0.102724	0.431441	ko00710	Os07t0108300-01(ALT-2);Os07t0108300-02(ALT-2);Os03t0773800-02(-);Os03t0773800-01(-);Os03t0773800-03(-);Os04t0306400-01(OsRPI)	K14272+K14272+K00026+K00026+K00026+K01807
Metabolism	Global and overview maps	Biosynthesis of secondary metabolites	50	2022	0.112532	0.440985	ko01110	Os03t0851800-01(PANC);Os03t0851800-02(PANC);Os03t0181500-01(ONI1);Os06t0214850-00(-);Os04t0136200-00(OsDAO3);Os03t0826600-01(NPC1);Os03t0826600-02(NPC1);Os11t0530600-01(CHS*);Os09t0457400-01(Amy3A/B/C*(RAmy3A/B/C));Os04t0650700-03(OsASNase2);Os04t0650700-01(OsASNase2);Os07t0421300-01(-);Os02t0129600-01(-);Os07t0170100-01(-);Os07t0170100-02(-);Os01t0948400-02(OsP5CR);Os01t0948400-01(OsP5CR);Os06t0…	K01918+K01918+K15397+K17872+K00276+K01114+K01114+K00660+K01176+K13051+K13051+K01187+K01177+K00167+K00167+K00286+K00286+K15227+K00688+K01900+K00454+K00454+K14272+K14272+K01188+K00587+K01695+K01695+K00026+K00026+K00026+K00276+K00600+K00600+K01807+K14674+K22845+K08242+K00030+K09589+K00703+K00703+K10525+K10525+K00873+K01193+K01193+K00928+K13513+K14066
Metabolism	Global and overview maps	2-Oxocarboxylic acid metabolism	4	88	0.115496	0.440985	ko01210	Os07t0108300-01(ALT-2);Os07t0108300-02(ALT-2);Os01t0276100-01(OsIDHa);Os03t0850400-01(-)	K14272+K14272+K00030+K00928
Genetic Information Processing	Translation	Aminoacyl-tRNA biosynthesis	4	90	0.122663	0.447985	ko00970	Os08t0150800-01(-);Os01t0687500-01(-);Os08t0320000-01(-);Os10t0182000-01(-)	K01866+K00604+K01866+K01872
Metabolism	Carbohydrate metabolism	Pentose and glucuronate interconversions	4	96	0.145253	0.508384	ko00040	Os06t0144900-01(-);Os06t0545400-01(OsPGL1);Os06t0545800-01(OsPGL8);Os06t0545200-00(OsPGL10)	K01728+K01213+K01213+K01213
Genetic Information Processing	Replication and repair	Mismatch repair	3	66	0.163207	0.548374	ko03430	Os09t0407600-01(OsMsh6);Os10t0574500-00(-);Os05t0244600-01(-)	K08737+K10756+K07466
Metabolism	Amino acid metabolism	Phenylalanine, tyrosine and tryptophan biosynthesis	3	70	0.18417	0.580793	ko00400	Os06t0542200-01(-);Os07t0182100-01(OsTSA);Os03t0797000-01(-)	K15227+K01695+K01695
Genetic Information Processing	Transcription	Spliceosome	9	301	0.186683	0.580793	ko03040	Os12t0572300-01(-);Os08t0492100-03(-);Os08t0492100-02(-);Os08t0492100-01(-);Os12t0572400-02(-);Os12t0572400-01(-);Os08t0416400-01(-);Os01t0265800-02(RBP-P);Os01t0265800-01(RBP-P)	K12900+K12741+K12741+K12741+K12900+K12900+K12822+K12741+K12741
Metabolism	Metabolism of cofactors and vitamins	Pantothenate and CoA biosynthesis	2	41	0.214776	0.62211	ko00770	Os03t0851800-01(PANC);Os03t0851800-02(PANC)	K01918+K01918
Metabolism	Biosynthesis of other secondary metabolites	Isoquinoline alkaloid biosynthesis	2	41	0.214776	0.62211	ko00950	Os04t0136200-00(OsDAO3);Os02t0593100-00(OsDAO5)	K00276+K00276
Metabolism	Carbohydrate metabolism	Galactose metabolism	3	82	0.250584	0.701635	ko00052	Os07t0421300-01(-);Os04t0535600-01(OSINV2);Os04t0535600-02(OSINV2)	K01187+K01193+K01193
Organismal Systems	Environmental adaptation	Plant-pathogen interaction	9	337	0.283477	0.749631	ko04626	Os03t0181500-01(ONI1);Os04t0470500-00(-);Os07t0619200-01(-);Os04t0471700-00(OsWRKY35);Os04t0514600-00(-);Os12t0163100-00(OsCNGC16);Os08t0246100-01(-);Os09t0558300-02(OsCNGC15);Os09t0558300-01(OsCNGC15)	K15397+K13459+K02183+K18835+K13459+K05391+K13457+K05391+K05391
Metabolism	Biosynthesis of other secondary metabolites	Tropane, piperidine and pyridine alkaloid biosynthesis	2	50	0.285574	0.749631	ko00960	Os04t0136200-00(OsDAO3);Os02t0593100-00(OsDAO5)	K00276+K00276
Genetic Information Processing	Folding, sorting and degradation	Protein processing in endoplasmic reticulum	9	345	0.306768	0.758448	ko04141	Os07t0409500-01(OSK21);Os10t0542200-01(-);Os03t0267000-00(OsHSP18.0-CI);Os03t0266900-02(OsHsp17.3);Os06t0219500-00(-);Os03t0742800-01(-);Os03t0742800-02(-);Os03t0131300-01(-);Os03t0131300-02(-)	K03094+K04523+K13993+K13993+K13993+K14006+K14006+K04523+K04523
Metabolism	Lipid metabolism	Steroid biosynthesis	2	54	0.316985	0.758448	ko00100	Os03t0810900-01(OspPLAIVbeta);Os03t0136200-01(Ossmt2-1)	K14674+K08242
Genetic Information Processing	Folding, sorting and degradation	Proteasome	3	95	0.325726	0.758448	ko03050	Os02t0133800-01(OsPAF1);Os02t0325100-01(OsRpt3);Os02t0325100-02(OsRpt3)	K02725+K03063+K03063
Metabolism	Amino acid metabolism	Arginine biosynthesis	2	56	0.332582	0.758448	ko00220	Os07t0108300-01(ALT-2);Os07t0108300-02(ALT-2)	K14272+K14272
Metabolism	Biosynthesis of other secondary metabolites	Monobactam biosynthesis	1	19	0.334078	0.758448	ko00261	Os03t0850400-01(-)	K00928
Cellular Processes	Transport and catabolism	Autophagy - other eukaryotes	2	59	0.355783	0.770178	ko04136	Os11t0141000-01(-);Os11t0141000-02(-)	K17606+K17606
Genetic Information Processing	Folding, sorting and degradation	Sulfur relay system	1	21	0.362016	0.770178	ko04122	Os12t0588900-01(-)	K14169
Metabolism	Amino acid metabolism	Lysine biosynthesis	1	22	0.375545	0.770178	ko00300	Os03t0850400-01(-)	K00928
Metabolism	Global and overview maps	Carbon metabolism	11	461	0.384042	0.770178	ko01200	Os02t0621700-01(-);Os07t0108300-01(ALT-2);Os07t0108300-02(ALT-2);Os03t0773800-02(-);Os03t0773800-01(-);Os03t0773800-03(-);Os03t0738400-03(OsSHM1);Os03t0738400-01(OsSHM1);Os04t0306400-01(OsRPI);Os01t0276100-01(OsIDHa);Os03t0672300-01(-)	K01900+K14272+K14272+K00026+K00026+K00026+K00600+K00600+K01807+K00030+K00873
Metabolism	Metabolism of cofactors and vitamins	Ubiquinone and other terpenoid-quinone biosynthesis	2	64	0.393783	0.770178	ko00130	Os06t0214850-00(-);Os12t0181300-00(-)	K17872+K12501
Metabolism	Lipid metabolism	Arachidonic acid metabolism	1	24	0.401753	0.770178	ko00590	Os03t0810900-01(OspPLAIVbeta)	K14674
Metabolism	Global and overview maps	Metabolic pathways	77	3546	0.403426	0.770178	ko01100	Os03t0851800-01(PANC);Os03t0851800-02(PANC);Os03t0181500-01(ONI1);Os03t0378000-01(-);Os06t0214850-00(-);Os04t0136200-00(OsDAO3);Os03t0826600-01(NPC1);Os03t0826600-02(NPC1);Os11t0530600-01(CHS*);Os06t0144900-01(-);Os05t0570400-00(-);Os12t0141100-01(-);Os12t0141100-02(-);Os09t0457400-01(Amy3A/B/C*(RAmy3A/B/C));Os07t0658700-01(-);Os04t0650700-03(OsASNase2);Os04t0650700-01(OsASNase2);Os07t0421300-01(…	K01918+K01918+K15397+K01510+K17872+K00276+K01114+K01114+K00660+K01728+K01937+K00889+K00889+K01176+K00889+K13051+K13051+K01187+K01177+K01759+K01759+K01759+K01759+K00913+K00167+K00167+K01213+K00286+K00286+K15227+K00688+K11816+K00889+K00889+K00889+K01900+K00423+K00654+K00454+K00454+K14272+K14272+K01188+K05292+K01695+K01695+K00889+K00026+K00026+K00026+K01231+K00276+K00600+K00600+K00469+K01807+K01213+…
Metabolism	Metabolism of terpenoids and polyketides	Brassinosteroid biosynthesis	1	28	0.450935	0.795467	ko00905	Os01t0197100-01(D2)	K09589
Metabolism	Biosynthesis of other secondary metabolites	Flavonoid biosynthesis	2	72	0.452356	0.795467	ko00941	Os11t0530600-01(CHS*);Os06t0343600-01(-)	K00660+K22845
Metabolism	Amino acid metabolism	Valine, leucine and isoleucine degradation	2	73	0.459455	0.795467	ko00280	Os07t0170100-01(-);Os07t0170100-02(-)	K00167+K00167
Metabolism	Amino acid metabolism	Tyrosine metabolism	2	74	0.466501	0.795467	ko00350	Os04t0136200-00(OsDAO3);Os02t0593100-00(OsDAO5)	K00276+K00276
Metabolism	Amino acid metabolism	Phenylalanine metabolism	2	74	0.466501	0.795467	ko00360	Os04t0136200-00(OsDAO3);Os02t0593100-00(OsDAO5)	K00276+K00276
Genetic Information Processing	Transcription	Basal transcription factors	2	75	0.473492	0.795467	ko03022	Os09t0534800-01(OsTFIIB);Os09t0534800-02(OsTFIIB)	K03124+K03124
Metabolism	Carbohydrate metabolism	Ascorbate and aldarate metabolism	2	79	0.500902	0.805464	ko00053	Os05t0485800-00(-);Os06t0561000-01(OsMIOX)	K00423+K00469
Metabolism	Lipid metabolism	Glycerophospholipid metabolism	4	175	0.509229	0.805464	ko00564	Os03t0826600-01(NPC1);Os03t0826600-02(NPC1);Os03t0810900-01(OspPLAIVbeta);Os01t0782500-01(-)	K01114+K01114+K14674+K13513
Metabolism	Glycan biosynthesis and metabolism	Glycosylphosphatidylinositol(GPI)-anchor biosynthesis	1	34	0.517274	0.805464	ko00563	Os11t0479232-01(-)	K05292
Metabolism	Metabolism of terpenoids and polyketides	Terpenoid backbone biosynthesis	2	82	0.520855	0.805464	ko00900	Os04t0602900-02(-);Os06t0678200-01(OsSPS1)	K00587+K14066
Genetic Information Processing	Replication and repair	DNA replication	2	83	0.527387	0.805464	ko03030	Os10t0574500-00(-);Os05t0244600-01(-)	K10756+K07466
Metabolism	Amino acid metabolism	Cysteine and methionine metabolism	4	182	0.540331	0.80555	ko00270	Os03t0773800-02(-);Os03t0773800-01(-);Os03t0773800-03(-);Os03t0850400-01(-)	K00026+K00026+K00026+K00928
Metabolism	Nucleotide metabolism	Pyrimidine metabolism	2	86	0.546623	0.80555	ko00240	Os03t0378000-01(-);Os05t0570400-00(-)	K01510+K01937
Metabolism	Nucleotide metabolism	Purine metabolism	3	143	0.586749	0.849774	ko00230	Os03t0378000-01(-);Os03t0320900-01(V2);Os03t0672300-01(-)	K01510+K00942+K00873
Metabolism	Amino acid metabolism	Arginine and proline metabolism	2	95	0.601016	0.855684	ko00330	Os01t0948400-02(OsP5CR);Os01t0948400-01(OsP5CR)	K00286+K00286
Genetic Information Processing	Folding, sorting and degradation	Ubiquitin mediated proteolysis	4	201	0.619381	0.863398	ko04120	Os07t0409500-01(OSK21);Os12t0626300-01(APC5);Os01t0125900-01(OsUBC34);Os01t0761900-00(-)	K03094+K03352+K10581+K04506
Metabolism	Glycan biosynthesis and metabolism	Various types of N-glycan biosynthesis	1	46	0.626991	0.863398	ko00513	Os06t0245700-00(-)	K01231
Genetic Information Processing	Replication and repair	Nucleotide excision repair	2	102	0.639846	0.866889	ko03420	Os10t0574500-00(-);Os05t0244600-01(-)	K10756+K07466
Metabolism	Lipid metabolism	Fatty acid elongation	1	51	0.66503	0.872852	ko00062	Os03t0181500-01(ONI1)	K15397
Metabolism	Lipid metabolism	Sphingolipid metabolism	1	51	0.66503	0.872852	ko00600	Os01t0928800-01(OsLCB2a1)	K00654
Genetic Information Processing	Folding, sorting and degradation	SNARE interactions in vesicular transport	1	54	0.685976	0.886492	ko04130	Os11t0168100-01(-)	K08500
Genetic Information Processing	Transcription	RNA polymerase	1	59	0.718032	0.913859	ko03020	Os05t0151000-00(-)	K03006
Genetic Information Processing	Replication and repair	Base excision repair	1	63	0.741318	0.913893	ko03410	Os05t0579100-01(-)	K01247
Metabolism	Glycan biosynthesis and metabolism	N-Glycan biosynthesis	1	64	0.746834	0.913893	ko00510	Os06t0245700-00(-)	K01231
Genetic Information Processing	Translation	Ribosome biogenesis in eukaryotes	2	126	0.750698	0.913893	ko03008	Os03t0343300-01(-);Os03t0735100-01(OsWD40-87)	K14567+K14548
Metabolism	Lipid metabolism	Glycerolipid metabolism	2	135	0.784068	0.940882	ko00561	Os03t0810900-01(OspPLAIVbeta);Os01t0782500-01(-)	K14674+K13513
Genetic Information Processing	Folding, sorting and degradation	Protein export	1	76	0.804581	0.951899	ko03060	Os04t0623700-01(-)	K03104
Metabolism	Carbohydrate metabolism	Pentose phosphate pathway	1	91	0.858694	0.997953	ko00030	Os04t0306400-01(OsRPI)	K01807
Genetic Information Processing	Translation	RNA transport	4	290	0.868068	0.997953	ko03013	Os07t0124500-01(eIF-3c);Os10t0467600-01(p28);Os02t0139200-01(OsPRMT5);Os06t0338900-01(-)	K03252+K03259+K02516+K03241
Genetic Information Processing	Replication and repair	Homologous recombination	1	99	0.881164	0.997953	ko03440	Os05t0244600-01(-)	K07466
Metabolism	Amino acid metabolism	Tryptophan metabolism	1	103	0.891029	0.997953	ko00380	Os04t0128900-01(YUCCA7)	K11816
Genetic Information Processing	Translation	mRNA surveillance pathway	2	191	0.916244	0.999857	ko03015	Os08t0305300-02(-);Os08t0305300-01(-)	K14409+K14409
Metabolism	Energy metabolism	Oxidative phosphorylation	2	192	0.917705	0.999857	ko00190	Os05t0114000-01(-);Os12t0422971-00(-)	K01507+K03936
Cellular Processes	Transport and catabolism	Phagosome	1	129	0.938032	0.999857	ko04145	Os08t0428900-01(-)	K00921
Environmental Information Processing	Signal transduction	Plant hormone signal transduction	4	375	0.960711	0.999857	ko04075	Os03t0265500-01(OsCOI2);Os03t0265500-02(OsCOI2);Os01t0741900-01(IAA6);Os02t0551100-01(SAPK6)	K13463+K13463+K14484+K14498
Environmental Information Processing	Signal transduction	MAPK signaling pathway - plant	2	265	0.978287	0.999857	ko04016	Os07t0619200-01(-);Os02t0551100-01(SAPK6)	K02183+K14498
Genetic Information Processing	Folding, sorting and degradation	RNA degradation	1	186	0.982149	0.999857	ko03018	Os11t0176200-01(OsDSHCT)	K12598
Metabolism	Carbohydrate metabolism	Glycolysis / Gluconeogenesis	1	224	0.992256	0.999857	ko00010	Os03t0672300-01(-)	K00873
Metabolism	Biosynthesis of other secondary metabolites	Phenylpropanoid biosynthesis	1	323	0.999139	0.999857	ko00940	Os05t0365600-01(Os5bglu19)	K01188
Genetic Information Processing	Translation	Ribosome	1	403	0.999857	0.999857	ko03010	Os01t0328400-01(RPS27a)	K02977

## Sheet:  zj-esa-vs-zj-esb
All enrichment KEGG terms of target of miRNAs between zj-esa and zj-esb in the comparison.
KEGG_A_class	KEGG_B_class	Pathway	Pir1a-vs-Pir1b (142)	All (7519)	Pvalue	Qvalue	Pathway ID	Genes	K_IDs
Metabolism	Biosynthesis of other secondary metabolites	Phenylpropanoid biosynthesis	19	323	9.24095e-06	0.000702312	ko00940	Os03t0369000-01(PRX46);Os01t0327100-01(prx15);Os01t0327100-02(prx15);Os10t0109300-01(PRX125);Os10t0109300-02(PRX125);Os02t0626400-01(OsPAL);Os01t0930800-01(Os1bglu5);Os08t0498600-02(ROMT-27);Os08t0498600-01(ROMT-27);Os02t0235900-01(-);Os04t0688200-01(prx60);Os05t0320700-02(C4H2);Os07t0639400-01(prx108);Os05t0135000-01(prx68);Os03t0368000-00(PRX42);Os03t0368300-01(prx43);Os06t0656500-01(4CL4);Os06…	K00430+K00430+K00430+K00430+K00430+K10775+K01188+K00588+K00588+K22395+K00430+K00487+K00430+K00430+K00430+K00430+K01904+K01904+K00430
Metabolism	Global and overview maps	Biosynthesis of secondary metabolites	54	2022	0.00225869	0.0577937	ko01110	Os04t0664900-01(OsCIN5);Os03t0369000-01(PRX46);Os01t0327100-01(prx15);Os01t0327100-02(prx15);Os09t0403300-00(CYP735A4);Os12t0563000-00(GPAT);Os10t0109300-01(PRX125);Os10t0109300-02(PRX125);Os02t0626400-01(OsPAL);Os08t0131300-00(GPAT);Os01t0930800-01(Os1bglu5);Os05t0171000-01(OsPLDalpha2);Os06t0632200-02(TS);Os06t0632200-01(TS);Os10t0550900-01(OsProDH);Os08t0498600-02(ROMT-27);Os08t0498600-01(ROMT…	K01193+K00430+K00430+K00430+K10717+K13508+K00430+K00430+K10775+K13508+K01188+K01115+K06001+K06001+K00318+K00588+K00588+K00286+K00286+K00620+K00620+K00276+K22395+K00430+K00487+K01640+K00454+K00454+K00454+K00454+K01695+K00430+K08695+K13545+K13545+K00511+K00511+K05933+K00430+K00703+K00703+K00703+K00703+K00430+K01115+K10717+K13427+K13427+K00430+K10760+K01904+K01904+K09838+K00430
Metabolism	Lipid metabolism	Linoleic acid metabolism	4	30	0.00228133	0.0577937	ko00591	Os02t0194700-01(OsLOX1);Os02t0194700-02(OsLOX1);Os05t0304600-02(OsLOX7);Os05t0304600-01(OsLOX7)	K00454+K00454+K00454+K00454
Metabolism	Amino acid metabolism	Arginine and proline metabolism	6	95	0.00896264	0.164924	ko00330	Os10t0550900-01(OsProDH);Os01t0948400-02(OsP5CR);Os01t0948400-01(OsP5CR);Os01t0710200-01(PAO1);Os02t0104700-02(NOA1);Os02t0104700-01(NOA1)	K00318+K00286+K00286+K12259+K13427+K13427
Metabolism	Global and overview maps	Metabolic pathways	81	3546	0.0108503	0.164924	ko01100	Os04t0664900-01(OsCIN5);Os10t0492900-01(-);Os03t0369000-01(PRX46);Os01t0327100-01(prx15);Os01t0327100-02(prx15);Os03t0595600-00(OsGSTU43);Os09t0403300-00(CYP735A4);Os12t0563000-00(GPAT);Os10t0109300-01(PRX125);Os10t0109300-02(PRX125);Os08t0530400-01(OSMCP);Os02t0626400-01(OsPAL);Os03t0294200-01(OsF2KP2);Os03t0294200-02(OsF2KP2);Os08t0131300-00(GPAT);Os01t0930800-01(Os1bglu5);Os06t0328900-01(-);Os…	K01193+K07407+K00430+K00430+K00430+K00799+K10717+K13508+K00430+K00430+K00387+K10775+K01103+K01103+K13508+K01188+K07408+K01115+K06001+K06001+K00318+K00588+K00588+K01184+K00913+K00286+K00286+K00620+K00620+K07408+K00276+K22395+K00430+K00487+K01640+K00423+K09480+K00454+K00454+K00454+K00454+K01488+K04713+K01535+K01535+K01695+K19892+K19892+K00430+K07541+K08695+K01051+K00511+K00511+K05933+K00430+K12259+…
Cellular Processes	Transport and catabolism	Endocytosis	10	249	0.0192097	0.217421	ko04144	Os05t0171000-01(OsPLDalpha2);Os02t0198300-01(-);Os02t0198300-02(-);Os03t0381200-02(-);Os03t0381200-01(-);Os03t0356596-01(-);Os02t0120200-01(OsPLDkappa);Os03t0246800-01(-);Os03t0246800-02(-);Os03t0246800-03(-)	K01115+K12486+K12486+K10365+K10365+K00889+K01115+K18442+K18442+K18442
Metabolism	Amino acid metabolism	Arginine biosynthesis	4	56	0.0209829	0.217421	ko00220	Os03t0279400-02(-);Os03t0279400-01(-);Os02t0104700-02(NOA1);Os02t0104700-01(NOA1)	K00620+K00620+K13427+K13427
Metabolism	Biosynthesis of other secondary metabolites	Stilbenoid, diarylheptanoid and gingerol biosynthesis	3	33	0.0237967	0.217421	ko00945	Os08t0498600-02(ROMT-27);Os08t0498600-01(ROMT-27);Os05t0320700-02(C4H2)	K00588+K00588+K00487
Metabolism	Glycan biosynthesis and metabolism	Glycosylphosphatidylinositol(GPI)-anchor biosynthesis	3	34	0.0257472	0.217421	ko00563	Os12t0596900-01(-);Os01t0907300-01(-);Os01t0907300-02(-)	K07541+K05291+K05291
Metabolism	Biosynthesis of other secondary metabolites	Flavonoid biosynthesis	4	72	0.046766	0.324809	ko00941	Os08t0498600-02(ROMT-27);Os08t0498600-01(ROMT-27);Os05t0320700-02(C4H2);Os04t0630600-00(OsSTA134)	K00588+K00588+K00487+K08695
Metabolism	Metabolism of terpenoids and polyketides	Zeatin biosynthesis	3	43	0.0470118	0.324809	ko00908	Os09t0403300-00(CYP735A4);Os08t0429800-00(CYP735A3);Os01t0688300-00(OsIPT8)	K10717+K10717+K10760
Metabolism	Lipid metabolism	alpha-Linolenic acid metabolism	4	84	0.0740185	0.436059	ko00592	Os02t0194700-01(OsLOX1);Os02t0194700-02(OsLOX1);Os05t0304600-02(OsLOX7);Os05t0304600-01(OsLOX7)	K00454+K00454+K00454+K00454
Metabolism	Metabolism of terpenoids and polyketides	Sesquiterpenoid and triterpenoid biosynthesis	2	24	0.0745891	0.436059	ko00909	Os03t0231700-02(-);Os03t0231700-01(-)	K00511+K00511
Genetic Information Processing	Translation	Aminoacyl-tRNA biosynthesis	4	90	0.090097	0.489098	ko00970	Os05t0150900-03(-);Os05t0150900-02(-);Os05t0150900-01(-);Os01t0687500-01(-)	K01892+K01892+K01892+K00604
Metabolism	Lipid metabolism	Glycerophospholipid metabolism	6	175	0.113328	0.569905	ko00564	Os12t0563000-00(GPAT);Os08t0131300-00(GPAT);Os04t0394100-00(-);Os05t0171000-01(OsPLDalpha2);Os02t0120200-01(OsPLDkappa);Os05t0535400-00(-)	K13508+K13508+K18696+K01115+K01115+K14156
Metabolism	Metabolism of cofactors and vitamins	Ubiquinone and other terpenoid-quinone biosynthesis	3	64	0.11998	0.569905	ko00130	Os05t0320700-02(C4H2);Os06t0656500-01(4CL4);Os06t0656500-02(4CL4)	K00487+K01904+K01904
Metabolism	Carbohydrate metabolism	Starch and sucrose metabolism	8	269	0.136072	0.608321	ko00500	Os04t0664900-01(OsCIN5);Os01t0930800-01(Os1bglu5);Os03t0374600-01(-);Os03t0374600-02(-);Os01t0720600-03(SSIVA);Os01t0720600-02(SSIVA);Os01t0720600-04(SSIVA);Os01t0720600-01(SSIVA)	K01193+K01188+K19892+K19892+K00703+K00703+K00703+K00703
Metabolism	Amino acid metabolism	Phenylalanine, tyrosine and tryptophan biosynthesis	3	70	0.145693	0.61515	ko00400	Os06t0632200-02(TS);Os06t0632200-01(TS);Os03t0797000-01(-)	K06001+K06001+K01695
Metabolism	Amino acid metabolism	Glycine, serine and threonine metabolism	4	119	0.187349	0.713553	ko00260	Os06t0632200-02(TS);Os06t0632200-01(TS);Os07t0572100-01(DAO);Os03t0797000-01(-)	K06001+K06001+K00276+K01695
Metabolism	Lipid metabolism	Synthesis and degradation of ketone bodies	1	11	0.189309	0.713553	ko00072	Os01t0269000-01(-)	K01640
Metabolism	Carbohydrate metabolism	Galactose metabolism	3	82	0.201673	0.713553	ko00052	Os04t0664900-01(OsCIN5);Os10t0492900-01(-);Os07t0209100-01(-)	K01193+K07407+K06617
Genetic Information Processing	Replication and repair	DNA replication	3	83	0.206555	0.713553	ko03030	Os12t0242900-01(-);Os01t0204000-02(-);Os01t0204000-01(-)	K02321+K03504+K03504
Metabolism	Glycan biosynthesis and metabolism	Glycosphingolipid biosynthesis - globo and isoglobo series	1	14	0.234448	0.716462	ko00603	Os10t0492900-01(-)	K07407
Metabolism	Lipid metabolism	Ether lipid metabolism	2	49	0.236431	0.716462	ko00565	Os05t0171000-01(OsPLDalpha2);Os02t0120200-01(OsPLDkappa)	K01115+K01115
Metabolism	Lipid metabolism	Sphingolipid metabolism	2	51	0.250478	0.716462	ko00600	Os10t0492900-01(-);Os06t0330400-00(-)	K07407+K04713
Metabolism	Lipid metabolism	Glycerolipid metabolism	4	135	0.251191	0.716462	ko00561	Os10t0492900-01(-);Os12t0563000-00(GPAT);Os08t0131300-00(GPAT);Os02t0539100-01(-)	K07407+K13508+K13508+K09480
Metabolism	Lipid metabolism	Steroid biosynthesis	2	54	0.271589	0.716462	ko00100	Os03t0231700-02(-);Os03t0231700-01(-)	K00511+K00511
Metabolism	Carbohydrate metabolism	Pentose and glucuronate interconversions	3	96	0.272012	0.716462	ko00040	Os11t0249400-00(OsPGL12);Os07t0691100-01(OsPME23);Os01t0172900-00(PG)	K01184+K01051+K01184
Genetic Information Processing	Replication and repair	Non-homologous end-joining	1	18	0.290775	0.716462	ko03450	Os04t0606450-01(OsLig4)	K10777
Organismal Systems	Environmental adaptation	Plant-pathogen interaction	8	337	0.304406	0.716462	ko04626	Os04t0618700-01(Os-FLS2);Os04t0471700-00(OsWRKY35);Os02t0513000-01(OsRLCK72);Os11t0569733-00(-);Os11t0136600-00(OsCDPK25);Os02t0104700-02(NOA1);Os02t0104700-01(NOA1);Os12t0133500-00(OsCDPK26)	K13420+K18835+K13430+K13437+K13412+K13427+K13427+K13412
Metabolism	Amino acid metabolism	Tryptophan metabolism	3	103	0.308202	0.716462	ko00380	Os06t0328900-01(-);Os10t0515200-01(-);Os08t0152300-00(-)	K07408+K07408+K07408
Metabolism	Metabolism of terpenoids and polyketides	Diterpenoid biosynthesis	2	60	0.313704	0.716462	ko00904	Os03t0650200-00(-);Os07t0594966-00(-)	K22639+K22639
Genetic Information Processing	Folding, sorting and degradation	Protein processing in endoplasmic reticulum	8	345	0.327031	0.716462	ko04141	Os10t0542200-01(-);Os01t0851400-01(-);Os11t0199200-01(ESP2);Os03t0742800-01(-);Os03t0742800-02(-);Os03t0131300-01(-);Os03t0131300-02(-);Os03t0245800-02(OsHSP26)	K04523+K11863+K09580+K14006+K14006+K04523+K04523+K13993
Genetic Information Processing	Folding, sorting and degradation	Sulfur relay system	1	21	0.330301	0.716462	ko04122	Os12t0588900-01(-)	K14169
Genetic Information Processing	Replication and repair	Base excision repair	2	63	0.334589	0.716462	ko03410	Os01t0204000-02(-);Os01t0204000-01(-)	K03504+K03504
Metabolism	Carbohydrate metabolism	Inositol phosphate metabolism	3	109	0.339377	0.716462	ko00562	Os03t0230500-01(DSM3);Os03t0356596-01(-);Os08t0428900-01(-)	K00913+K00889+K00921
Genetic Information Processing	Replication and repair	Mismatch repair	2	66	0.355289	0.729782	ko03430	Os01t0204000-02(-);Os01t0204000-01(-)	K03504+K03504
Environmental Information Processing	Signal transduction	Phosphatidylinositol signaling system	3	115	0.370475	0.74095	ko04070	Os03t0230500-01(DSM3);Os03t0356596-01(-);Os08t0428900-01(-)	K00913+K00889+K00921
Metabolism	Amino acid metabolism	Phenylalanine metabolism	2	74	0.409273	0.758653	ko00360	Os02t0626400-01(OsPAL);Os07t0572100-01(DAO)	K10775+K00276
Metabolism	Metabolism of other amino acids	beta-Alanine metabolism	2	74	0.409273	0.758653	ko00410	Os07t0572100-01(DAO);Os01t0710200-01(PAO1)	K00276+K12259
Metabolism	Metabolism of cofactors and vitamins	Porphyrin and chlorophyll metabolism	2	74	0.409273	0.758653	ko00860	Os10t0389300-02(OsRCCR2);Os10t0389300-01(OsRCCR2)	K13545+K13545
Metabolism	Metabolism of cofactors and vitamins	One carbon pool by folate	1	32	0.457403	0.827682	ko00670	Os01t0687500-01(-)	K00604
Metabolism	Global and overview maps	2-Oxocarboxylic acid metabolism	2	88	0.498034	0.861212	ko01210	Os03t0279400-02(-);Os03t0279400-01(-)	K00620+K00620
Genetic Information Processing	Folding, sorting and degradation	Ubiquitin mediated proteolysis	4	201	0.529427	0.861212	ko04120	Os05t0153132-00(OsUBC36);Os05t0152900-00(-);Os01t0125900-01(OsUBC34);Os01t0122200-01(-)	K10581+K04506+K10581+K04506
Metabolism	Biosynthesis of other secondary metabolites	Isoquinoline alkaloid biosynthesis	1	41	0.54334	0.861212	ko00950	Os07t0572100-01(DAO)	K00276
Metabolism	Global and overview maps	Biosynthesis of amino acids	7	369	0.550628	0.861212	ko01230	Os06t0632200-02(TS);Os06t0632200-01(TS);Os01t0948400-02(OsP5CR);Os01t0948400-01(OsP5CR);Os03t0279400-02(-);Os03t0279400-01(-);Os03t0797000-01(-)	K06001+K06001+K00286+K00286+K00620+K00620+K01695
Metabolism	Carbohydrate metabolism	Butanoate metabolism	1	43	0.56052	0.861212	ko00650	Os01t0269000-01(-)	K01640
Metabolism	Metabolism of terpenoids and polyketides	Carotenoid biosynthesis	1	43	0.56052	0.861212	ko00906	Os04t0448950-01(-)	K09838
Genetic Information Processing	Replication and repair	Homologous recombination	2	99	0.5616	0.861212	ko03440	Os01t0204000-02(-);Os01t0204000-01(-)	K03504+K03504
Metabolism	Carbohydrate metabolism	Fructose and mannose metabolism	2	102	0.577919	0.861212	ko00051	Os03t0294200-01(OsF2KP2);Os03t0294200-02(OsF2KP2)	K01103+K01103
Genetic Information Processing	Replication and repair	Nucleotide excision repair	2	102	0.577919	0.861212	ko03420	Os01t0204000-02(-);Os01t0204000-01(-)	K03504+K03504
Metabolism	Energy metabolism	Sulfur metabolism	1	48	0.600712	0.877964	ko00920	Os08t0530400-01(OSMCP)	K00387
Metabolism	Biosynthesis of other secondary metabolites	Tropane, piperidine and pyridine alkaloid biosynthesis	1	50	0.615747	0.882958	ko00960	Os07t0572100-01(DAO)	K00276
Genetic Information Processing	Translation	RNA transport	5	290	0.645606	0.90863	ko03013	Os05t0353400-01(OsImpbeta1);Os02t0741500-01(-);Os12t0165900-01(OsNucAP2);Os08t0107900-02(OsMAGO1);Os08t0107900-01(OsMAGO1)	K14293+K09291+K14297+K12877+K12877
Environmental Information Processing	Membrane transport	ABC transporters	1	59	0.676742	0.918435	ko02010	Os02t0693700-02(OsABCB11)	K05658
Genetic Information Processing	Transcription	RNA polymerase	1	59	0.676742	0.918435	ko03020	Os01t0183400-01(OsNF-YC13)	K03004
Metabolism	Amino acid metabolism	Lysine degradation	1	64	0.706366	0.940094	ko00310	Os07t0435900-01(OsSET25)	K11420
Cellular Processes	Transport and catabolism	Peroxisome	2	140	0.746813	0.940094	ko04146	Os01t0269000-01(-);Os05t0209400-01(-)	K01640+K17879
Metabolism	Amino acid metabolism	Valine, leucine and isoleucine degradation	1	73	0.753057	0.940094	ko00280	Os01t0269000-01(-)	K01640
Metabolism	Amino acid metabolism	Tyrosine metabolism	1	74	0.757766	0.940094	ko00350	Os07t0572100-01(DAO)	K00276
Genetic Information Processing	Transcription	Basal transcription factors	1	75	0.762386	0.940094	ko03022	Os01t0680400-01(-)	K03135
Genetic Information Processing	Folding, sorting and degradation	Protein export	1	76	0.766919	0.940094	ko03060	Os01t0321300-00(-)	K03070
Metabolism	Carbohydrate metabolism	Ascorbate and aldarate metabolism	1	79	0.780008	0.940962	ko00053	Os05t0485800-00(-)	K00423
Genetic Information Processing	Transcription	Spliceosome	4	301	0.826647	0.969051	ko03040	Os01t0686600-01(-);Os06t0218000-00(OsSKIPb);Os08t0107900-02(OsMAGO1);Os08t0107900-01(OsMAGO1)	K12867+K06063+K12877+K12877
Metabolism	Metabolism of other amino acids	Cyanoamino acid metabolism	1	92	0.828794	0.969051	ko00460	Os01t0930800-01(Os1bglu5)	K01188
Environmental Information Processing	Signal transduction	Plant hormone signal transduction	5	375	0.843793	0.97164	ko04075	Os12t0138500-01(-);Os03t0265500-01(OsCOI2);Os03t0265500-02(OsCOI2);Os11t0141900-00(-);Os04t0673300-01(RR6)	K14508+K13463+K13463+K14508+K14492
Genetic Information Processing	Folding, sorting and degradation	RNA degradation	2	186	0.871189	0.971998	ko03018	Os12t0156400-01(-);Os10t0471350-01(-)	K12611+K14442
Genetic Information Processing	Translation	mRNA surveillance pathway	2	191	0.880657	0.971998	ko03015	Os08t0107900-02(OsMAGO1);Os08t0107900-01(OsMAGO1)	K12877+K12877
Metabolism	Energy metabolism	Oxidative phosphorylation	2	192	0.882472	0.971998	ko00190	Os03t0689300-02(OSA1);Os03t0689300-01(OSA1)	K01535+K01535
Genetic Information Processing	Translation	Ribosome biogenesis in eukaryotes	1	126	0.91132	0.980863	ko03008	Os02t0543300-00(-)	K14536
Cellular Processes	Transport and catabolism	Phagosome	1	129	0.916333	0.980863	ko04145	Os08t0428900-01(-)	K00921
Metabolism	Nucleotide metabolism	Purine metabolism	1	143	0.93625	0.983125	ko00230	Os07t0661000-01(-)	K01488
Metabolism	Metabolism of other amino acids	Glutathione metabolism	1	161	0.95509	0.983125	ko00480	Os03t0595600-00(OsGSTU43)	K00799
Environmental Information Processing	Signal transduction	MAPK signaling pathway - plant	2	265	0.963309	0.983125	ko04016	Os03t0178100-00(OsHMA6);Os04t0618700-01(Os-FLS2)	K17686+K13420
Metabolism	Amino acid metabolism	Cysteine and methionine metabolism	1	182	0.97019	0.983125	ko00270	Os05t0149400-01(ACO5)	K05933
Metabolism	Carbohydrate metabolism	Amino sugar and nucleotide sugar metabolism	1	226	0.987417	0.987417	ko00520	Os05t0488900-01(-)	K00326

## Sheet: zj-esa-vs-zj-esc
All enrichment KEGG terms of target of miRNAs between zj-esa and zj-esc in the comparison.
KEGG_A_class	KEGG_B_class	Pathway	Pir1a-vs-Pir1c (236)	All (7519)	Pvalue	Qvalue	Pathway ID	Genes	K_IDs
Metabolism	Carbohydrate metabolism	Starch and sucrose metabolism	20	269	0.000285656	0.0308508	ko00500	Os04t0249500-00(SUS7);Os09t0457400-01(Amy3A/B/C*(RAmy3A/B/C));Os01t0930800-01(Os1bglu5);Os03t0758100-01(Pho1);Os09t0530200-01(OsGH9B14);Os04t0309600-01(SUS5);Os03t0374600-01(-);Os03t0374600-02(-);Os10t0521000-01(OsTRE);Os08t0409100-01(OsTPP6);Os01t0749400-02(OsTPS2);Os03t0749300-03(OsBGLU1);Os03t0749300-01(OsBGLU1);Os03t0749300-02(OsBGLU1);Os05t0366800-00(Os5bglu23);Os08t0445700-01(OsTPS8);Os08t0…	K00695+K01176+K01188+K00688+K01179+K00695+K19892+K19892+K01194+K01087+K16055+K05349+K05349+K05349+K01188+K16055+K16055+K01193+K01193+K01179
Genetic Information Processing	Replication and repair	Non-homologous end-joining	4	18	0.00204598	0.0994092	ko03450	Os07t0184900-02(OsKu70);Os07t0184900-01(OsKu70);Os07t0184900-03(OsKu70);Os04t0606450-01(OsLig4)	K10884+K10884+K10884+K10777
Metabolism	Global and overview maps	Biosynthesis of secondary metabolites	83	2022	0.00276137	0.0994092	ko01110	Os04t0249500-00(SUS7);Os06t0306300-01(prx78);Os03t0713000-00(-);Os05t0549700-02(-);Os05t0549700-01(-);Os05t0102000-01(OsJMT1);Os10t0477900-00(-);Os09t0457400-01(Amy3A/B/C*(RAmy3A/B/C));Os02t0603800-01(OsHDS);Os01t0930800-01(Os1bglu5);Os05t0211100-01(CYP51G3);Os05t0211100-02(CYP51G3);Os02t0814200-02(Os0053);Os02t0814200-01(Os0053);Os11t0143200-01(OsCPD1);Os01t0948400-02(OsP5CR);Os01t0948400-01(OsP…	K00695+K00430+K01754+K01733+K01733+K08241+K08695+K01176+K03526+K01188+K05917+K05917+K15404+K15404+K09588+K00286+K00286+K15095+K00688+K00128+K00128+K00827+K02552+K00276+K00695+K09832+K00487+K13066+K01640+K01648+K01648+K01648+K06127+K00454+K00430+K00430+K00001+K20623+K00133+K01695+K00026+K00026+K00026+K10528+K10528+K09588+K00901+K01194+K10251+K01087+K01858+K05933+K16055+K05349+K05349+K05349+K19517+…
Metabolism	Amino acid metabolism	Glycine, serine and threonine metabolism	9	119	0.0122896	0.288348	ko00260	Os03t0713000-00(-);Os05t0549700-02(-);Os05t0549700-01(-);Os03t0338000-01(-);Os07t0572100-01(DAO);Os03t0760700-01(-);Os03t0797000-01(-);Os01t0316100-00(-);Os01t0328700-01(-)	K01754+K01733+K01733+K00827+K00276+K00133+K01695+K00306+K00382
Metabolism	Amino acid metabolism	Lysine degradation	6	64	0.01474	0.288348	ko00310	Os02t0730000-02(OsALDH2a);Os02t0730000-01(OsALDH2a);Os08t0400200-00(OsSET30);Os01t0316100-00(-);Os01t0328700-01(-);Os04t0544100-01(OsSET20)	K00128+K00128+K11420+K00306+K00382+K11420
Metabolism	Lipid metabolism	alpha-Linolenic acid metabolism	7	84	0.0160193	0.288348	ko00592	Os05t0102000-01(OsJMT1);Os02t0194700-01(OsLOX1);Os02t0110200-02(HPL3);Os02t0110200-01(HPL3);Os03t0179900-01(OsLOX2);Os03t0132000-01(OsACS4);Os01t0370000-01(OsOPR9)	K08241+K00454+K10528+K10528+K00454+K10526+K05894
Metabolism	Carbohydrate metabolism	Citrate cycle (TCA cycle)	7	88	0.0202239	0.312026	ko00020	Os01t0300200-01(-);Os01t0300200-03(-);Os01t0300200-02(-);Os03t0773800-02(-);Os03t0773800-01(-);Os03t0773800-03(-);Os01t0328700-01(-)	K01648+K01648+K01648+K00026+K00026+K00026+K00382
Genetic Information Processing	Folding, sorting and degradation	Sulfur relay system	3	21	0.026746	0.361071	ko04122	Os12t0588900-01(-);Os09t0338400-02(OsISC1);Os09t0338400-01(OsISC1)	K14169+K04487+K04487
Metabolism	Amino acid metabolism	Tryptophan metabolism	7	103	0.0427416	0.43343	ko00380	Os06t0328900-01(-);Os10t0515200-01(-);Os02t0730000-02(OsALDH2a);Os02t0730000-01(OsALDH2a);Os12t0512000-01(YUCCA5);Os08t0152300-00(-);Os01t0328700-01(-)	K07408+K07408+K00128+K00128+K11816+K07408+K00382
Metabolism	Biosynthesis of other secondary metabolites	Phenylpropanoid biosynthesis	16	323	0.0470184	0.43343	ko00940	Os06t0306300-01(prx78);Os01t0930800-01(Os1bglu5);Os05t0320700-02(C4H2);Os12t0199500-00(OsCOMTL1);Os06t0681600-01(prx89);Os06t0681600-02(prx89);Os03t0749300-03(OsBGLU1);Os03t0749300-01(OsBGLU1);Os03t0749300-02(OsBGLU1);Os05t0366800-00(Os5bglu23);Os02t0741200-01(prx31);Os08t0113000-01(prx117);Os06t0547100-00(prx87);Os06t0656500-01(4CL4);Os06t0656500-02(4CL4);Os07t0638600-00(prx105)	K00430+K01188+K00487+K13066+K00430+K00430+K05349+K05349+K05349+K01188+K00430+K00430+K00430+K01904+K01904+K00430
Metabolism	Metabolism of cofactors and vitamins	Ubiquinone and other terpenoid-quinone biosynthesis	5	64	0.0497978	0.43343	ko00130	Os09t0361500-01(ICS1);Os05t0320700-02(C4H2);Os01t0976600-01(-);Os06t0656500-01(4CL4);Os06t0656500-02(4CL4)	K02552+K00487+K06127+K01904+K01904
Metabolism	Metabolism of terpenoids and polyketides	Limonene and pinene degradation	2	12	0.0526324	0.43343	ko00903	Os02t0730000-02(OsALDH2a);Os02t0730000-01(OsALDH2a)	K00128+K00128
Metabolism	Global and overview maps	Metabolic pathways	124	3546	0.0530942	0.43343	ko01100	Os04t0249500-00(SUS7);Os12t0178100-01(OsAPx6);Os06t0306300-01(prx78);Os11t0544800-01(GATB);Os10t0492900-01(-);Os03t0713000-00(-);Os05t0549700-02(-);Os05t0549700-01(-);Os07t0674100-01(OsUXS6);Os04t0643300-01(-);Os10t0477900-00(-);Os09t0457400-01(Amy3A/B/C*(RAmy3A/B/C));Os02t0603800-01(OsHDS);Os01t0930800-01(Os1bglu5);Os09t0346500-04(CAB1R);Os06t0328900-01(-);Os05t0211100-01(CYP51G3);Os05t0211100-0…	K00695+K00434+K00430+K02434+K07407+K01754+K01733+K01733+K08678+K00648+K08695+K01176+K03526+K01188+K08912+K07408+K05917+K05917+K01051+K01184+K09588+K00913+K00286+K00286+K07408+K00688+K00128+K00128+K00827+K02552+K01179+K00276+K00695+K10256+K09832+K00487+K02641+K02641+K02641+K13066+K01640+K01648+K01648+K01648+K00423+K00799+K00654+K06127+K00454+K01488+K04713+K00430+K00430+K00001+K20623+K01535+K01535+…
Metabolism	Metabolism of terpenoids and polyketides	Brassinosteroid biosynthesis	3	28	0.0561854	0.43343	ko00905	Os11t0143200-01(OsCPD1);Os09t0264400-01(-);Os12t0139300-01(OsCPD2)	K09588+K20623+K09588
Metabolism	Amino acid metabolism	Arginine and proline metabolism	6	95	0.0776009	0.499225	ko00330	Os01t0948400-02(OsP5CR);Os01t0948400-01(OsP5CR);Os02t0730000-02(OsALDH2a);Os02t0730000-01(OsALDH2a);Os01t0710200-01(PAO1);Os05t0489100-01(-)	K00286+K00286+K00128+K00128+K12259+K00472
Metabolism	Metabolism of cofactors and vitamins	One carbon pool by folate	3	32	0.07774	0.499225	ko00670	Os01t0687500-01(-);Os07t0578600-02(-);Os07t0578600-01(-)	K00604+K01934+K01934
Metabolism	Amino acid metabolism	Valine, leucine and isoleucine degradation	5	73	0.0785817	0.499225	ko00280	Os02t0730000-02(OsALDH2a);Os02t0730000-01(OsALDH2a);Os03t0338000-01(-);Os01t0269000-01(-);Os01t0328700-01(-)	K00128+K00128+K00827+K01640+K00382
Metabolism	Lipid metabolism	Steroid biosynthesis	4	54	0.0885904	0.510471	ko00100	Os05t0211100-01(CYP51G3);Os05t0211100-02(CYP51G3);Os01t0211000-00(-);Os03t0231800-02(-)	K05917+K05917+K09832+K00511
Genetic Information Processing	Folding, sorting and degradation	Protein export	5	76	0.0898051	0.510471	ko03060	Os01t0321300-00(-);Os10t0521300-01(-);Os03t0116000-00(-);Os04t0623700-01(-);Os12t0438900-01(-)	K03070+K03217+K03217+K03104+K12946
Metabolism	Metabolism of cofactors and vitamins	Vitamin B6 metabolism	2	18	0.108035	0.56249	ko00750	Os05t0549700-02(-);Os05t0549700-01(-)	K01733+K01733
Genetic Information Processing	Transcription	RNA polymerase	4	59	0.113335	0.56249	ko03020	Os03t0646800-01(-);Os03t0646800-02(-);Os05t0151000-00(-);Os03t0845700-01(-)	K03010+K03010+K03006+K03016
Metabolism	Carbohydrate metabolism	Galactose metabolism	5	82	0.114581	0.56249	ko00052	Os10t0492900-01(-);Os08t0495800-01(Osh69);Os08t0495800-02(Osh69);Os04t0535600-01(OSINV2);Os04t0535600-02(OSINV2)	K07407+K06617+K06617+K01193+K01193
Genetic Information Processing	Folding, sorting and degradation	Protein processing in endoplasmic reticulum	15	345	0.125047	0.587176	ko04141	Os10t0542200-01(-);Os11t0703900-01(HSP70);Os01t0851400-01(-);Os12t0514500-01(-);Os08t0487800-01(-);Os07t0692800-00(-);Os11t0199200-01(ESP2);Os06t0219500-00(-);Os07t0471000-01(IRE1);Os03t0131300-01(-);Os03t0131300-02(-);Os08t0162400-02(-);Os08t0162400-01(-);Os02t0711300-01(-);Os06t0163500-01(OsSub49)	K04523+K03283+K11863+K09487+K09487+K03237+K09580+K13993+K08852+K04523+K04523+K10666+K10666+K13993+K08653
Metabolism	Lipid metabolism	Cutin, suberine and wax biosynthesis	3	43	0.151509	0.681792	ko00073	Os02t0814200-02(Os0053);Os02t0814200-01(Os0053);Os08t0557800-01(-)	K15404+K15404+K13356
Metabolism	Metabolism of other amino acids	Cyanoamino acid metabolism	5	92	0.162178	0.70061	ko00460	Os01t0930800-01(Os1bglu5);Os03t0749300-03(OsBGLU1);Os03t0749300-01(OsBGLU1);Os03t0749300-02(OsBGLU1);Os05t0366800-00(Os5bglu23)	K01188+K05349+K05349+K05349+K01188
Metabolism	Metabolism of terpenoids and polyketides	Sesquiterpenoid and triterpenoid biosynthesis	2	24	0.172919	0.718279	ko00909	Os03t0231800-02(-);Os06t0483200-01(OsOSC6)	K00511+K19011
Metabolism	Metabolism of other amino acids	beta-Alanine metabolism	4	74	0.202298	0.773149	ko00410	Os02t0730000-02(OsALDH2a);Os02t0730000-01(OsALDH2a);Os07t0572100-01(DAO);Os01t0710200-01(PAO1)	K00128+K00128+K00276+K12259
Metabolism	Carbohydrate metabolism	Pyruvate metabolism	7	154	0.209489	0.773149	ko00620	Os02t0730000-02(OsALDH2a);Os02t0730000-01(OsALDH2a);Os03t0773800-02(-);Os03t0773800-01(-);Os03t0773800-03(-);Os03t0672300-01(-);Os01t0328700-01(-)	K00128+K00128+K00026+K00026+K00026+K00873+K00382
Metabolism	Lipid metabolism	Sphingolipid metabolism	3	51	0.214764	0.773149	ko00600	Os10t0492900-01(-);Os01t0928800-01(OsLCB2a1);Os06t0330400-00(-)	K07407+K00654+K04713
Metabolism	Lipid metabolism	Biosynthesis of unsaturated fatty acids	3	51	0.214764	0.773149	ko01040	Os02t0716500-03(OsFAD2);Os06t0299100-01(-);Os04t0483500-01(KCR1)	K10256+K10251+K10251
Metabolism	Carbohydrate metabolism	Ascorbate and aldarate metabolism	4	79	0.235636	0.780346	ko00053	Os12t0178100-01(OsAPx6);Os02t0730000-02(OsALDH2a);Os02t0730000-01(OsALDH2a);Os05t0485800-00(-)	K00434+K00128+K00128+K00423
Metabolism	Lipid metabolism	Linoleic acid metabolism	2	30	0.24233	0.780346	ko00591	Os02t0194700-01(OsLOX1);Os03t0179900-01(OsLOX2)	K00454+K00454
Metabolism	Lipid metabolism	Glycerolipid metabolism	6	135	0.249727	0.780346	ko00561	Os10t0492900-01(-);Os02t0730000-02(OsALDH2a);Os02t0730000-01(OsALDH2a);Os12t0576900-01(-);Os02t0714100-01(OsDGAT);Os09t0394700-01(-)	K07407+K00128+K00128+K00901+K22848+K01054
Metabolism	Amino acid metabolism	Valine, leucine and isoleucine biosynthesis	2	31	0.254073	0.780346	ko00290	Os03t0713000-00(-);Os02t0608550-00(-)	K01754+K01653
Metabolism	Amino acid metabolism	Histidine metabolism	2	31	0.254073	0.780346	ko00340	Os02t0730000-02(OsALDH2a);Os02t0730000-01(OsALDH2a)	K00128+K00128
Organismal Systems	Environmental adaptation	Plant-pathogen interaction	13	337	0.260115	0.780346	ko04626	Os06t0191500-01(-);Os04t0470500-00(-);Os04t0618700-01(Os-FLS2);Os07t0681400-01(OsCML24);Os12t0169800-00(OsCDPK28);Os12t0514500-01(-);Os03t0769500-01(-);Os08t0487800-01(-);Os11t0639600-02(-);Os11t0639600-01(-);Os11t0559200-00(Xa21*);Os11t0569733-00(-);Os04t0219600-01(rNBS17)	K13413+K13459+K13420+K13448+K13412+K09487+K13448+K09487+K13457+K13457+K13437+K13437+K13457
Metabolism	Glycan biosynthesis and metabolism	Glycosylphosphatidylinositol(GPI)-anchor biosynthesis	2	34	0.289328	0.84137	ko00563	Os01t0907300-01(-);Os01t0907300-02(-)	K05291+K05291
Metabolism	Lipid metabolism	Synthesis and degradation of ketone bodies	1	11	0.296038	0.84137	ko00072	Os01t0269000-01(-)	K01640
Metabolism	Metabolism of terpenoids and polyketides	Monoterpenoid biosynthesis	1	12	0.318165	0.881073	ko00902	Os04t0531750-00(-)	K15095
Metabolism	Metabolism of cofactors and vitamins	Thiamine metabolism	2	38	0.335981	0.881394	ko00730	Os09t0338400-02(OsISC1);Os09t0338400-01(OsISC1)	K04487+K04487
Metabolism	Carbohydrate metabolism	C5-Branched dibasic acid metabolism	1	13	0.3396	0.881394	ko00660	Os02t0608550-00(-)	K01653
Metabolism	Energy metabolism	Carbon fixation in photosynthetic organisms	6	152	0.342764	0.881394	ko00710	Os03t0773800-02(-);Os03t0773800-01(-);Os03t0773800-03(-);Os03t0781400-02(-);Os03t0781400-01(-);Os12t0169600-01(-)	K00026+K00026+K00026+K01807+K01807+K01623
Metabolism	Glycan biosynthesis and metabolism	Glycosphingolipid biosynthesis - globo and isoglobo series	1	14	0.360364	0.905101	ko00603	Os10t0492900-01(-)	K07407
Metabolism	Global and overview maps	Biosynthesis of amino acids	13	369	0.374215	0.918527	ko01230	Os03t0713000-00(-);Os05t0549700-02(-);Os05t0549700-01(-);Os01t0948400-02(OsP5CR);Os01t0948400-01(OsP5CR);Os03t0760700-01(-);Os03t0797000-01(-);Os03t0781400-02(-);Os03t0781400-01(-);Os03t0672300-01(-);Os02t0608550-00(-);Os03t0712800-02(OsGS1);Os12t0169600-01(-)	K01754+K01733+K01733+K00286+K00286+K00133+K01695+K01807+K01807+K00873+K01653+K01915+K01623
Metabolism	Carbohydrate metabolism	Butanoate metabolism	2	43	0.392929	0.943031	ko00650	Os01t0269000-01(-);Os02t0608550-00(-)	K01640+K01653
Metabolism	Carbohydrate metabolism	Glyoxylate and dicarboxylate metabolism	5	135	0.418501	0.960182	ko00630	Os03t0773800-02(-);Os03t0773800-01(-);Os03t0773800-03(-);Os01t0328700-01(-);Os03t0712800-02(OsGS1)	K00026+K00026+K00026+K00382+K01915
Metabolism	Metabolism of cofactors and vitamins	Folate biosynthesis	2	47	0.43687	0.960182	ko00790	Os01t0238500-01(-);Os01t0238500-02(-)	K18482+K18482
Metabolism	Carbohydrate metabolism	Inositol phosphate metabolism	4	109	0.448361	0.960182	ko00562	Os03t0230500-01(DSM3);Os10t0369900-01(OsINO2);Os03t0737701-01(OsMIK);Os08t0428900-01(-)	K00913+K01858+K19517+K00921
Cellular Processes	Transport and catabolism	Peroxisome	5	140	0.449567	0.960182	ko04146	Os01t0269000-01(-);Os02t0123200-01(-);Os08t0557800-01(-);Os05t0209400-01(-);Os01t0316100-00(-)	K01640+K13335+K13356+K17879+K00306
Metabolism	Biosynthesis of other secondary metabolites	Monobactam biosynthesis	1	19	0.454828	0.960182	ko00261	Os03t0760700-01(-)	K00133
Metabolism	Lipid metabolism	Fatty acid degradation	3	80	0.461748	0.960182	ko00071	Os02t0730000-02(OsALDH2a);Os02t0730000-01(OsALDH2a);Os11t0210600-01(Adh3)	K00128+K00128+K00001
Metabolism	Global and overview maps	Fatty acid metabolism	4	111	0.46231	0.960182	ko01212	Os04t0643300-01(-);Os02t0716500-03(OsFAD2);Os06t0299100-01(-);Os04t0483500-01(KCR1)	K00648+K10256+K10251+K10251
Metabolism	Lipid metabolism	Fatty acid elongation	2	51	0.479039	0.974755	ko00062	Os06t0299100-01(-);Os04t0483500-01(KCR1)	K10251+K10251
Metabolism	Amino acid metabolism	Lysine biosynthesis	1	22	0.504696	0.974755	ko00300	Os03t0760700-01(-)	K00133
Genetic Information Processing	Folding, sorting and degradation	SNARE interactions in vesicular transport	2	54	0.509377	0.974755	ko04130	Os02t0119400-01(-);Os12t0192300-00(-)	K08501+K08486
Metabolism	Amino acid metabolism	Cysteine and methionine metabolism	6	182	0.51043	0.974755	ko00270	Os03t0338000-01(-);Os03t0760700-01(-);Os03t0773800-02(-);Os03t0773800-01(-);Os03t0773800-03(-);Os05t0149400-01(ACO5)	K00827+K00133+K00026+K00026+K00026+K05933
Environmental Information Processing	Signal transduction	Plant hormone signal transduction	12	375	0.515552	0.974755	ko04075	Os06t0191500-01(-);Os03t0265500-01(OsCOI2);Os03t0265500-02(OsCOI2);Os03t0639300-01(OsPIL12);Os01t0741900-01(IAA6);Os03t0633500-01(IAA11);Os10t0392400-01(OsTIFY11d);Os06t0605900-01(OsFbox316);Os04t0608300-01(OsSAUR20);Os05t0563400-01(OsARF15);Os09t0280500-01(OsbZIP70);Os11t0221000-01(OsIAA27)	K13413+K13463+K13463+K16189+K14484+K14484+K13464+K14515+K14488+K14486+K14431+K14484
Genetic Information Processing	Translation	Aminoacyl-tRNA biosynthesis	3	90	0.540713	0.974755	ko00970	Os11t0544800-01(GATB);Os01t0687500-01(-);Os02t0139600-01(-)	K02434+K00604+K22503
Metabolism	Carbohydrate metabolism	Pentose phosphate pathway	3	91	0.548243	0.974755	ko00030	Os03t0781400-02(-);Os03t0781400-01(-);Os12t0169600-01(-)	K01807+K01807+K01623
Environmental Information Processing	Membrane transport	ABC transporters	2	59	0.557314	0.974755	ko02010	Os02t0190000-00(-);Os02t0693700-02(OsABCB11)	K05658+K05658
Cellular Processes	Transport and catabolism	Autophagy - other eukaryotes	2	59	0.557314	0.974755	ko04136	Os03t0391000-01(OsATG4a);Os04t0682000-01(Atg4)	K08342+K08342
Metabolism	Carbohydrate metabolism	Glycolysis / Gluconeogenesis	7	224	0.559582	0.974755	ko00010	Os02t0730000-02(OsALDH2a);Os02t0730000-01(OsALDH2a);Os11t0210600-01(Adh3);Os03t0672300-01(-);Os01t0328700-01(-);Os04t0603000-00(-);Os12t0169600-01(-)	K00128+K00128+K00001+K00873+K00382+K01792+K01623
Metabolism	Energy metabolism	Photosynthesis - antenna proteins	1	27	0.577917	0.990715	ko00196	Os09t0346500-04(CAB1R)	K08912
Environmental Information Processing	Signal transduction	MAPK signaling pathway - plant	8	265	0.596371	0.995054	ko04016	Os06t0191500-01(-);Os04t0618700-01(Os-FLS2);Os08t0102900-00(OsVQ32);Os11t0160500-01(OsbZIP81);Os06t0605900-01(OsFbox316);Os06t0203800-01(RLCK204);Os02t0666300-01(YDA2);Os05t0545300-01(-)	K13413+K13420+K20725+K20557+K14515+K20718+K20717+K20716
Metabolism	Energy metabolism	Photosynthesis	3	98	0.598875	0.995054	ko00195	Os02t0103800-02(OsLFNR1);Os02t0103800-01(OsLFNR1);Os02t0103800-03(OsLFNR1)	K02641+K02641+K02641
Metabolism	Glycan biosynthesis and metabolism	Other glycan degradation	1	30	0.616566	0.999337	ko00511	Os10t0140200-01(-)	K01191
Metabolism	Biosynthesis of other secondary metabolites	Stilbenoid, diarylheptanoid and gingerol biosynthesis	1	33	0.65169	0.999337	ko00945	Os05t0320700-02(C4H2)	K00487
Metabolism	Biosynthesis of other secondary metabolites	Flavonoid biosynthesis	2	72	0.665934	0.999337	ko00941	Os10t0477900-00(-);Os05t0320700-02(C4H2)	K08695+K00487
Metabolism	Amino acid metabolism	Tyrosine metabolism	2	74	0.680602	0.999337	ko00350	Os07t0572100-01(DAO);Os11t0210600-01(Adh3)	K00276+K00001
Genetic Information Processing	Transcription	Basal transcription factors	2	75	0.687738	0.999337	ko03022	Os09t0534800-01(OsTFIIB);Os09t0534800-02(OsTFIIB)	K03124+K03124
Environmental Information Processing	Signal transduction	Phosphatidylinositol signaling system	3	115	0.705625	0.999337	ko04070	Os03t0230500-01(DSM3);Os12t0576900-01(-);Os08t0428900-01(-)	K00913+K00901+K00921
Metabolism	Metabolism of cofactors and vitamins	Pantothenate and CoA biosynthesis	1	41	0.730463	0.999337	ko00770	Os02t0608550-00(-)	K01653
Metabolism	Biosynthesis of other secondary metabolites	Isoquinoline alkaloid biosynthesis	1	41	0.730463	0.999337	ko00950	Os07t0572100-01(DAO)	K00276
Genetic Information Processing	Replication and repair	DNA replication	2	83	0.740214	0.999337	ko03030	Os01t0642900-01(SSB);Os07t0406800-01(-)	K03111+K02685
Metabolism	Amino acid metabolism	Alanine, aspartate and glutamate metabolism	2	84	0.746217	0.999337	ko00250	Os03t0338000-01(-);Os03t0712800-02(OsGS1)	K00827+K01915
Metabolism	Metabolism of terpenoids and polyketides	Carotenoid biosynthesis	1	43	0.747208	0.999337	ko00906	Os04t0448950-01(-)	K09838
Metabolism	Metabolism of terpenoids and polyketides	Zeatin biosynthesis	1	43	0.747208	0.999337	ko00908	Os01t0688300-00(OsIPT8)	K10760
Genetic Information Processing	Translation	Ribosome biogenesis in eukaryotes	3	126	0.762308	0.999337	ko03008	Os12t0634800-01(-);Os11t0545000-03(-);Os11t0545000-01(-)	K14546+K14565+K14565
Metabolism	Global and overview maps	2-Oxocarboxylic acid metabolism	2	88	0.769056	0.999337	ko01210	Os03t0760700-01(-);Os02t0608550-00(-)	K00133+K01653
Metabolism	Carbohydrate metabolism	Propanoate metabolism	1	47	0.777654	0.999337	ko00640	Os01t0328700-01(-)	K00382
Metabolism	Biosynthesis of other secondary metabolites	Tropane, piperidine and pyridine alkaloid biosynthesis	1	50	0.798067	0.999337	ko00960	Os07t0572100-01(DAO)	K00276
Cellular Processes	Transport and catabolism	Endocytosis	6	249	0.800263	0.999337	ko04144	Os11t0703900-01(HSP70);Os02t0198300-01(-);Os02t0198300-02(-);Os04t0117300-02(-);Os03t0381200-02(-);Os03t0381200-01(-)	K03283+K12486+K12486+K18443+K10365+K10365
Metabolism	Energy metabolism	Nitrogen metabolism	1	51	0.804447	0.999337	ko00910	Os03t0712800-02(OsGS1)	K01915
Metabolism	Carbohydrate metabolism	Pentose and glucuronate interconversions	2	96	0.809427	0.999337	ko00040	Os08t0220400-01(OsPME24);Os11t0249400-00(OsPGL12)	K01051+K01184
Metabolism	Nucleotide metabolism	Purine metabolism	3	143	0.832244	0.999337	ko00230	Os07t0661000-01(-);Os03t0672300-01(-);Os08t0557200-01(-)	K01488+K00873+K01517
Metabolism	Amino acid metabolism	Arginine biosynthesis	1	56	0.833461	0.999337	ko00220	Os03t0712800-02(OsGS1)	K01915
Genetic Information Processing	Folding, sorting and degradation	RNA degradation	4	186	0.841484	0.999337	ko03018	Os06t0300800-01(OsWD40-128);Os11t0176200-01(OsDSHCT);Os04t0467400-01(OsCAF1-3);Os02t0102900-01(OsCPn60beta2)	K12616+K12598+K01148+K04077
Metabolism	Lipid metabolism	Fatty acid biosynthesis	1	58	0.843828	0.999337	ko00061	Os04t0643300-01(-)	K00648
Metabolism	Metabolism of terpenoids and polyketides	Diterpenoid biosynthesis	1	60	0.853552	0.999337	ko00904	Os04t0517600-00(-)	K04124
Genetic Information Processing	Replication and repair	Mismatch repair	1	66	0.879253	0.999337	ko03430	Os01t0642900-01(SSB)	K03111
Metabolism	Metabolism of other amino acids	Glutathione metabolism	3	161	0.886343	0.999337	ko00480	Os12t0178100-01(OsAPx6);Os10t0529400-01(OsGSTU9);Os10t0530500-01(OsGSTU13)	K00434+K00799+K00799
Metabolism	Amino acid metabolism	Phenylalanine, tyrosine and tryptophan biosynthesis	1	70	0.893838	0.999337	ko00400	Os03t0797000-01(-)	K01695
Genetic Information Processing	Translation	RNA transport	6	290	0.898705	0.999337	ko03013	Os07t0613300-01(-);Os07t0613300-02(-);Os09t0363600-01(OsWD40-171);Os07t0692800-00(-);Os07t0685400-01(-);Os01t0583700-00(OsSTA17)	K14288+K14288+K13175+K03237+K14317+K03243
Organismal Systems	Environmental adaptation	Circadian rhythm - plant	1	73	0.903614	0.999337	ko04712	Os06t0694000-01(OsZTL2)	K12115
Metabolism	Amino acid metabolism	Phenylalanine metabolism	1	74	0.906669	0.999337	ko00360	Os07t0572100-01(DAO)	K00276
Metabolism	Lipid metabolism	Glycerophospholipid metabolism	3	175	0.917076	0.999337	ko00564	Os10t0163310-01(-);Os12t0576900-01(-);Os08t0557200-01(-)	K06129+K00901+K01517
Metabolism	Metabolism of terpenoids and polyketides	Terpenoid backbone biosynthesis	1	82	0.92788	0.999337	ko00900	Os02t0603800-01(OsHDS)	K03526
Metabolism	Global and overview maps	Carbon metabolism	9	461	0.958145	0.999337	ko01200	Os03t0713000-00(-);Os03t0773800-02(-);Os03t0773800-01(-);Os03t0773800-03(-);Os03t0781400-02(-);Os03t0781400-01(-);Os03t0672300-01(-);Os01t0328700-01(-);Os12t0169600-01(-)	K01754+K00026+K00026+K00026+K01807+K01807+K00873+K00382+K01623
Genetic Information Processing	Replication and repair	Homologous recombination	1	99	0.958341	0.999337	ko03440	Os01t0642900-01(SSB)	K03111
Metabolism	Carbohydrate metabolism	Fructose and mannose metabolism	1	102	0.962191	0.999337	ko00051	Os12t0169600-01(-)	K01623
Genetic Information Processing	Replication and repair	Nucleotide excision repair	1	102	0.962191	0.999337	ko03420	Os01t0636700-01(CSB)	K10841
Cellular Processes	Transport and catabolism	Phagosome	1	129	0.984233	0.999337	ko04145	Os08t0428900-01(-)	K00921
Metabolism	Energy metabolism	Oxidative phosphorylation	2	192	0.985054	0.999337	ko00190	Os03t0689300-02(OSA1);Os03t0689300-01(OSA1)	K01535+K01535
Genetic Information Processing	Transcription	Spliceosome	4	301	0.987014	0.999337	ko03040	Os11t0703900-01(HSP70);Os08t0492100-03(-);Os08t0492100-02(-);Os08t0492100-01(-)	K03283+K12741+K12741+K12741
Genetic Information Processing	Folding, sorting and degradation	Ubiquitin mediated proteolysis	2	201	0.988407	0.999337	ko04120	Os05t0152900-00(-);Os01t0125900-01(OsUBC34)	K04506+K10581
Genetic Information Processing	Translation	Ribosome	5	403	0.996351	0.999337	ko03010	Os08t0162900-00(-);Os03t0576700-01(RPL13b);Os06t0701400-01(-);Os06t0683200-01(-);Os09t0501200-01(rpL32_9.1)	K02873+K02873+K02942+K02895+K02912
Genetic Information Processing	Translation	mRNA surveillance pathway	1	191	0.99791	0.999337	ko03015	Os09t0542700-00(-)	K11584
Metabolism	Carbohydrate metabolism	Amino sugar and nucleotide sugar metabolism	1	226	0.999337	0.999337	ko00520	Os07t0674100-01(OsUXS6)	K08678

## Sheet: zj-esb-vs-zj-esc
All enrichment KEGG terms of target of miRNAs between zj-esb and zj-esc in the comparison.
KEGG_A_class	KEGG_B_class	Pathway	Pir1b-vs-Pir1c (184)	All (7519)	Pvalue	Qvalue	Pathway ID	Genes	K_IDs
Metabolism	Lipid metabolism	alpha-Linolenic acid metabolism	8	84	0.000984375	0.0974531	ko00592	Os05t0102000-01(OsJMT1);Os02t0194700-01(OsLOX1);Os05t0304600-02(OsLOX7);Os05t0304600-01(OsLOX7);Os02t0110200-02(HPL3);Os02t0110200-01(HPL3);Os03t0179900-01(OsLOX2);Os03t0132000-01(OsACS4)	K08241+K00454+K00454+K00454+K10528+K10528+K00454+K10526
Metabolism	Global and overview maps	Biosynthesis of secondary metabolites	66	2022	0.0042475	0.190822	ko01110	Os03t0851800-01(PANC);Os03t0851800-02(PANC);Os07t0412100-01(GBSSII);Os07t0412100-02(GBSSII);Os03t0713000-00(-);Os05t0549700-02(-);Os05t0549700-01(-);Os05t0102000-01(OsJMT1);Os10t0477900-00(-);Os09t0457400-01(Amy3A/B/C*(RAmy3A/B/C));Os02t0603800-01(OsHDS);Os05t0211100-01(CYP51G3);Os05t0211100-02(CYP51G3);Os04t0650800-01(-);Os11t0143200-01(OsCPD1);Os04t0531750-00(-);Os03t0758100-01(Pho1);Os02t07300…	K01918+K01918+K13679+K13679+K01754+K01733+K01733+K08241+K08695+K01176+K03526+K05917+K05917+K00058+K09588+K15095+K00688+K00128+K00128+K00827+K02552+K09832+K13066+K01648+K01648+K01648+K06127+K00454+K00454+K00454+K00430+K00430+K01599+K00001+K20623+K00133+K09842+K10528+K10528+K09588+K00901+K01194+K01895+K01895+K10251+K01087+K01858+K19517+K10251+K01188+K00454+K01807+K01807+K00430+K00430+K00430+K04124+…
Metabolism	Lipid metabolism	Linoleic acid metabolism	4	30	0.00578248	0.190822	ko00591	Os02t0194700-01(OsLOX1);Os05t0304600-02(OsLOX7);Os05t0304600-01(OsLOX7);Os03t0179900-01(OsLOX2)	K00454+K00454+K00454+K00454
Genetic Information Processing	Folding, sorting and degradation	Sulfur relay system	3	21	0.0138614	0.288146	ko04122	Os12t0588900-01(-);Os09t0338400-02(OsISC1);Os09t0338400-01(OsISC1)	K14169+K04487+K04487
Metabolism	Carbohydrate metabolism	Starch and sucrose metabolism	13	269	0.0145528	0.288146	ko00500	Os07t0412100-01(GBSSII);Os07t0412100-02(GBSSII);Os09t0457400-01(Amy3A/B/C*(RAmy3A/B/C));Os03t0758100-01(Pho1);Os09t0530200-01(OsGH9B14);Os03t0374600-01(-);Os03t0374600-02(-);Os10t0521000-01(OsTRE);Os08t0409100-01(OsTPP6);Os05t0366800-00(Os5bglu23);Os08t0445700-01(OsTPS8);Os08t0445700-02(OsTPS8);Os05t0129200-00(OsGH9B12)	K13679+K13679+K01176+K00688+K01179+K19892+K19892+K01194+K01087+K01188+K16055+K16055+K01179
Metabolism	Amino acid metabolism	Lysine degradation	5	64	0.019783	0.326419	ko00310	Os02t0730000-02(OsALDH2a);Os02t0730000-01(OsALDH2a);Os08t0400200-00(OsSET30);Os01t0316100-00(-);Os04t0544100-01(OsSET20)	K00128+K00128+K11420+K00306+K11420
Metabolism	Amino acid metabolism	Glycine, serine and threonine metabolism	7	119	0.0264367	0.368047	ko00260	Os03t0713000-00(-);Os05t0549700-02(-);Os05t0549700-01(-);Os04t0650800-01(-);Os03t0338000-01(-);Os03t0760700-01(-);Os01t0316100-00(-)	K01754+K01733+K01733+K00058+K00827+K00133+K00306
Metabolism	Metabolism of terpenoids and polyketides	Brassinosteroid biosynthesis	3	28	0.030149	0.368047	ko00905	Os11t0143200-01(OsCPD1);Os09t0264400-01(-);Os12t0139300-01(OsCPD2)	K09588+K20623+K09588
Metabolism	Metabolism of terpenoids and polyketides	Limonene and pinene degradation	2	12	0.0334588	0.368047	ko00903	Os02t0730000-02(OsALDH2a);Os02t0730000-01(OsALDH2a)	K00128+K00128
Metabolism	Lipid metabolism	Steroid biosynthesis	4	54	0.0425204	0.382824	ko00100	Os05t0211100-01(CYP51G3);Os05t0211100-02(CYP51G3);Os01t0211000-00(-);Os03t0231800-02(-)	K05917+K05917+K09832+K00511
Metabolism	Metabolism of cofactors and vitamins	One carbon pool by folate	3	32	0.042536	0.382824	ko00670	Os01t0687500-01(-);Os07t0578600-02(-);Os07t0578600-01(-)	K00604+K01934+K01934
Metabolism	Lipid metabolism	Glycerolipid metabolism	7	135	0.0474075	0.391112	ko00561	Os11t0683500-01(Os11bglu36);Os11t0683500-02(Os11bglu36);Os02t0730000-02(OsALDH2a);Os02t0730000-01(OsALDH2a);Os12t0576900-01(-);Os02t0714100-01(OsDGAT);Os09t0394700-01(-)	K21362+K21362+K00128+K00128+K00901+K22848+K01054
Organismal Systems	Environmental adaptation	Plant-pathogen interaction	13	337	0.069306	0.452176	ko04626	Os06t0191500-01(-);Os04t0618700-01(Os-FLS2);Os07t0681400-01(OsCML24);Os12t0169800-00(OsCDPK28);Os12t0514500-01(-);Os03t0769500-01(-);Os08t0487800-01(-);Os11t0639600-02(-);Os11t0639600-01(-);Os11t0559200-00(Xa21*);Os11t0569733-00(-);Os09t0479600-01(-);Os04t0219600-01(rNBS17)	K13413+K13420+K13448+K13412+K09487+K13448+K09487+K13457+K13457+K13437+K13437+K13457+K13457
Metabolism	Metabolism of cofactors and vitamins	Vitamin B6 metabolism	2	18	0.0705213	0.452176	ko00750	Os05t0549700-02(-);Os05t0549700-01(-)	K01733+K01733
Metabolism	Metabolism of cofactors and vitamins	Ubiquinone and other terpenoid-quinone biosynthesis	4	64	0.0710101	0.452176	ko00130	Os09t0361500-01(ICS1);Os01t0976600-01(-);Os06t0656500-01(4CL4);Os06t0656500-02(4CL4)	K02552+K06127+K01904+K01904
Metabolism	Global and overview maps	Metabolic pathways	97	3546	0.0730789	0.452176	ko01100	Os03t0851800-01(PANC);Os03t0851800-02(PANC);Os12t0178100-01(OsAPx6);Os07t0412100-01(GBSSII);Os07t0412100-02(GBSSII);Os03t0713000-00(-);Os05t0549700-02(-);Os05t0549700-01(-);Os07t0674100-01(OsUXS6);Os04t0643300-01(-);Os03t0670200-01(-);Os08t0530400-01(OSMCP);Os10t0477900-00(-);Os09t0457400-01(Amy3A/B/C*(RAmy3A/B/C));Os02t0603800-01(OsHDS);Os09t0346500-04(CAB1R);Os05t0211100-01(CYP51G3);Os05t021110…	K01918+K01918+K00434+K13679+K13679+K01754+K01733+K01733+K08678+K00648+K05284+K00387+K08695+K01176+K03526+K08912+K05917+K05917+K00058+K01051+K09588+K00913+K00688+K00128+K00128+K00827+K02552+K01179+K10256+K09832+K02641+K02641+K02641+K13066+K01648+K01648+K01648+K00799+K00654+K06127+K00454+K00454+K00454+K00430+K00430+K01599+K00001+K20623+K00133+K19892+K19892+K09842+K09588+K00901+K01194+K01895+K01895+…
Metabolism	Metabolism of other amino acids	beta-Alanine metabolism	4	74	0.10709	0.623642	ko00410	Os03t0851800-01(PANC);Os03t0851800-02(PANC);Os02t0730000-02(OsALDH2a);Os02t0730000-01(OsALDH2a)	K01918+K01918+K00128+K00128
Metabolism	Metabolism of terpenoids and polyketides	Sesquiterpenoid and triterpenoid biosynthesis	2	24	0.115806	0.63693	ko00909	Os03t0231800-02(-);Os06t0483200-01(OsOSC6)	K00511+K19011
Metabolism	Lipid metabolism	Biosynthesis of unsaturated fatty acids	3	51	0.128391	0.668984	ko01040	Os02t0716500-03(OsFAD2);Os06t0299100-01(-);Os04t0483500-01(KCR1)	K10256+K10251+K10251
Metabolism	Amino acid metabolism	Histidine metabolism	2	31	0.175123	0.866859	ko00340	Os02t0730000-02(OsALDH2a);Os02t0730000-01(OsALDH2a)	K00128+K00128
Metabolism	Metabolism of cofactors and vitamins	Thiamine metabolism	2	38	0.238048	0.903901	ko00730	Os09t0338400-02(OsISC1);Os09t0338400-01(OsISC1)	K04487+K04487
Metabolism	Metabolism of terpenoids and polyketides	Monoterpenoid biosynthesis	1	12	0.257349	0.903901	ko00902	Os04t0531750-00(-)	K15095
Metabolism	Amino acid metabolism	Valine, leucine and isoleucine degradation	3	73	0.264698	0.903901	ko00280	Os02t0730000-02(OsALDH2a);Os02t0730000-01(OsALDH2a);Os03t0338000-01(-)	K00128+K00128+K00827
Metabolism	Metabolism of cofactors and vitamins	Pantothenate and CoA biosynthesis	2	41	0.265438	0.903901	ko00770	Os03t0851800-01(PANC);Os03t0851800-02(PANC)	K01918+K01918
Metabolism	Biosynthesis of other secondary metabolites	Phenylpropanoid biosynthesis	10	323	0.266798	0.903901	ko00940	Os01t0591300-01(OsALDH2C1);Os12t0199500-00(OsCOMTL1);Os06t0681600-01(prx89);Os06t0681600-02(prx89);Os05t0366800-00(Os5bglu23);Os02t0741200-01(prx31);Os08t0113000-01(prx117);Os06t0547100-00(prx87);Os06t0656500-01(4CL4);Os06t0656500-02(4CL4)	K12355+K13066+K00430+K00430+K01188+K00430+K00430+K00430+K01904+K01904
Metabolism	Carbohydrate metabolism	Inositol phosphate metabolism	4	109	0.277221	0.903901	ko00562	Os03t0230500-01(DSM3);Os10t0369900-01(OsINO2);Os03t0737701-01(OsMIK);Os08t0428900-01(-)	K00913+K01858+K19517+K00921
Metabolism	Metabolism of terpenoids and polyketides	Carotenoid biosynthesis	2	43	0.283711	0.903901	ko00906	Os07t0282300-01(OsAAO3);Os04t0448950-01(-)	K09842+K09838
Genetic Information Processing	Folding, sorting and degradation	Protein export	3	76	0.28473	0.903901	ko03060	Os10t0521300-01(-);Os03t0116000-00(-);Os12t0438900-01(-)	K03217+K03217+K12946
Metabolism	Global and overview maps	Fatty acid metabolism	4	111	0.288197	0.903901	ko01212	Os04t0643300-01(-);Os02t0716500-03(OsFAD2);Os06t0299100-01(-);Os04t0483500-01(KCR1)	K00648+K10256+K10251+K10251
Metabolism	Carbohydrate metabolism	Ascorbate and aldarate metabolism	3	79	0.304885	0.903901	ko00053	Os12t0178100-01(OsAPx6);Os02t0730000-02(OsALDH2a);Os02t0730000-01(OsALDH2a)	K00434+K00128+K00128
Metabolism	Carbohydrate metabolism	Glycolysis / Gluconeogenesis	7	224	0.308727	0.903901	ko00010	Os02t0730000-02(OsALDH2a);Os02t0730000-01(OsALDH2a);Os11t0210600-01(Adh3);Os02t0525900-01(-);Os02t0525900-02(-);Os04t0603000-00(-);Os12t0169600-01(-)	K00128+K00128+K00001+K01895+K01895+K01792+K01623
Metabolism	Lipid metabolism	Fatty acid degradation	3	80	0.311621	0.903901	ko00071	Os02t0730000-02(OsALDH2a);Os02t0730000-01(OsALDH2a);Os11t0210600-01(Adh3)	K00128+K00128+K00001
Metabolism	Carbohydrate metabolism	Propanoate metabolism	2	47	0.320096	0.903901	ko00640	Os02t0525900-01(-);Os02t0525900-02(-)	K01895+K01895
Metabolism	Metabolism of cofactors and vitamins	Folate biosynthesis	2	47	0.320096	0.903901	ko00790	Os01t0238500-01(-);Os01t0238500-02(-)	K18482+K18482
Environmental Information Processing	Signal transduction	MAPK signaling pathway - plant	8	265	0.322632	0.903901	ko04016	Os06t0191500-01(-);Os04t0618700-01(Os-FLS2);Os08t0102900-00(OsVQ32);Os11t0160500-01(OsbZIP81);Os06t0605900-01(OsFbox316);Os06t0203800-01(RLCK204);Os02t0666300-01(YDA2);Os05t0545300-01(-)	K13413+K13420+K20725+K20557+K14515+K20718+K20717+K20716
Genetic Information Processing	Folding, sorting and degradation	Protein processing in endoplasmic reticulum	10	345	0.336847	0.903901	ko04141	Os10t0542200-01(-);Os11t0703900-01(HSP70);Os12t0514500-01(-);Os08t0487800-01(-);Os07t0692800-00(-);Os06t0219500-00(-);Os07t0471000-01(IRE1);Os03t0131300-01(-);Os03t0131300-02(-);Os02t0711300-01(-)	K04523+K03283+K09487+K09487+K03237+K13993+K08852+K04523+K04523+K13993
Metabolism	Lipid metabolism	Fatty acid elongation	2	51	0.35603	0.903901	ko00062	Os06t0299100-01(-);Os04t0483500-01(KCR1)	K10251+K10251
Metabolism	Carbohydrate metabolism	Citrate cycle (TCA cycle)	3	88	0.365494	0.903901	ko00020	Os01t0300200-01(-);Os01t0300200-03(-);Os01t0300200-02(-)	K01648+K01648+K01648
Metabolism	Biosynthesis of other secondary metabolites	Monobactam biosynthesis	1	19	0.375816	0.903901	ko00261	Os03t0760700-01(-)	K00133
Genetic Information Processing	Translation	Aminoacyl-tRNA biosynthesis	3	90	0.378888	0.903901	ko00970	Os01t0687500-01(-);Os02t0139600-01(-);Os10t0182000-01(-)	K00604+K22503+K01872
Genetic Information Processing	Folding, sorting and degradation	SNARE interactions in vesicular transport	2	54	0.382538	0.903901	ko04130	Os02t0119400-01(-);Os12t0192300-00(-)	K08501+K08486
Metabolism	Carbohydrate metabolism	Pentose phosphate pathway	3	91	0.385564	0.903901	ko00030	Os03t0781400-02(-);Os03t0781400-01(-);Os12t0169600-01(-)	K01807+K01807+K01623
Metabolism	Amino acid metabolism	Arginine and proline metabolism	3	95	0.412089	0.903901	ko00330	Os02t0730000-02(OsALDH2a);Os02t0730000-01(OsALDH2a);Os05t0489100-01(-)	K00128+K00128+K00472
Metabolism	Amino acid metabolism	Lysine biosynthesis	1	22	0.420644	0.903901	ko00300	Os03t0760700-01(-)	K00133
Genetic Information Processing	Transcription	RNA polymerase	2	59	0.425636	0.903901	ko03020	Os03t0646800-01(-);Os03t0646800-02(-)	K03010+K03010
Cellular Processes	Transport and catabolism	Autophagy - other eukaryotes	2	59	0.425636	0.903901	ko04136	Os03t0391000-01(OsATG4a);Os04t0682000-01(Atg4)	K08342+K08342
Metabolism	Energy metabolism	Photosynthesis	3	98	0.431752	0.903901	ko00195	Os02t0103800-02(OsLFNR1);Os02t0103800-01(OsLFNR1);Os02t0103800-03(OsLFNR1)	K02641+K02641+K02641
Genetic Information Processing	Replication and repair	Homologous recombination	3	99	0.438255	0.903901	ko03440	Os01t0106700-00(-);Os01t0642900-01(SSB);Os05t0244600-01(-)	K04728+K03111+K07466
Metabolism	Amino acid metabolism	Tryptophan metabolism	3	103	0.463977	0.937424	ko00380	Os02t0730000-02(OsALDH2a);Os02t0730000-01(OsALDH2a);Os12t0512000-01(YUCCA5)	K00128+K00128+K11816
Genetic Information Processing	Replication and repair	Mismatch repair	2	66	0.483231	0.944489	ko03430	Os01t0642900-01(SSB);Os05t0244600-01(-)	K03111+K07466
Metabolism	Energy metabolism	Photosynthesis - antenna proteins	1	27	0.488352	0.944489	ko00196	Os09t0346500-04(CAB1R)	K08912
Metabolism	Carbohydrate metabolism	Pyruvate metabolism	4	154	0.523636	0.944489	ko00620	Os02t0730000-02(OsALDH2a);Os02t0730000-01(OsALDH2a);Os02t0525900-01(-);Os02t0525900-02(-)	K00128+K00128+K01895+K01895
Metabolism	Glycan biosynthesis and metabolism	Other glycan degradation	1	30	0.525136	0.944489	ko00511	Os10t0140200-01(-)	K01191
Metabolism	Amino acid metabolism	Valine, leucine and isoleucine biosynthesis	1	31	0.536803	0.944489	ko00290	Os03t0713000-00(-)	K01754
Organismal Systems	Environmental adaptation	Circadian rhythm - plant	2	73	0.537151	0.944489	ko04712	Os01t0566100-01(OsELF3.2);Os01t0566100-02(OsELF3.2)	K12125+K12125
Environmental Information Processing	Signal transduction	Phosphatidylinositol signaling system	3	115	0.537786	0.944489	ko04070	Os03t0230500-01(DSM3);Os12t0576900-01(-);Os08t0428900-01(-)	K00913+K00901+K00921
Genetic Information Processing	Transcription	Basal transcription factors	2	75	0.551836	0.944489	ko03022	Os09t0534800-01(OsTFIIB);Os09t0534800-02(OsTFIIB)	K03124+K03124
Metabolism	Global and overview maps	Biosynthesis of amino acids	9	369	0.553337	0.944489	ko01230	Os03t0713000-00(-);Os05t0549700-02(-);Os05t0549700-01(-);Os04t0650800-01(-);Os03t0760700-01(-);Os03t0781400-02(-);Os03t0781400-01(-);Os03t0712800-02(OsGS1);Os12t0169600-01(-)	K01754+K01733+K01733+K00058+K00133+K01807+K01807+K01915+K01623
Metabolism	Glycan biosynthesis and metabolism	Glycosylphosphatidylinositol(GPI)-anchor biosynthesis	1	34	0.570121	0.956644	ko00563	Os03t0670200-01(-)	K05284
Metabolism	Carbohydrate metabolism	Galactose metabolism	2	82	0.600626	0.980125	ko00052	Os08t0495800-01(Osh69);Os08t0495800-02(Osh69)	K06617+K06617
Genetic Information Processing	Replication and repair	DNA replication	2	83	0.607263	0.980125	ko03030	Os01t0642900-01(SSB);Os05t0244600-01(-)	K03111+K07466
Metabolism	Amino acid metabolism	Alanine, aspartate and glutamate metabolism	2	84	0.613815	0.980125	ko00250	Os03t0338000-01(-);Os03t0712800-02(OsGS1)	K00827+K01915
Metabolism	Carbohydrate metabolism	Glyoxylate and dicarboxylate metabolism	3	135	0.646891	0.980188	ko00630	Os02t0525900-01(-);Os02t0525900-02(-);Os03t0712800-02(OsGS1)	K01895+K01895+K01915
Metabolism	Lipid metabolism	Cutin, suberine and wax biosynthesis	1	43	0.656436	0.980188	ko00073	Os08t0557800-01(-)	K13356
Cellular Processes	Transport and catabolism	Peroxisome	3	140	0.671156	0.980188	ko04146	Os02t0123200-01(-);Os08t0557800-01(-);Os01t0316100-00(-)	K13335+K13356+K00306
Genetic Information Processing	Folding, sorting and degradation	Proteasome	2	95	0.680445	0.980188	ko03050	Os11t0615700-01(OsPAE1);Os11t0615700-02(OsPAE1)	K02729+K02729
Metabolism	Energy metabolism	Sulfur metabolism	1	48	0.696694	0.980188	ko00920	Os08t0530400-01(OSMCP)	K00387
Environmental Information Processing	Signal transduction	Plant hormone signal transduction	8	375	0.705689	0.980188	ko04075	Os06t0191500-01(-);Os03t0639300-01(OsPIL12);Os03t0633500-01(IAA11);Os10t0392400-01(OsTIFY11d);Os06t0605900-01(OsFbox316);Os04t0608300-01(OsSAUR20);Os05t0563400-01(OsARF15);Os09t0280500-01(OsbZIP70)	K13413+K16189+K14484+K13464+K14515+K14488+K14486+K14431
Genetic Information Processing	Replication and repair	Nucleotide excision repair	2	102	0.717785	0.980188	ko03420	Os01t0636700-01(CSB);Os05t0244600-01(-)	K10841+K07466
Metabolism	Lipid metabolism	Sphingolipid metabolism	1	51	0.71856	0.980188	ko00600	Os01t0928800-01(OsLCB2a1)	K00654
Metabolism	Energy metabolism	Nitrogen metabolism	1	51	0.71856	0.980188	ko00910	Os03t0712800-02(OsGS1)	K01915
Genetic Information Processing	Translation	RNA transport	6	290	0.719802	0.980188	ko03013	Os05t0353400-01(OsImpbeta1);Os07t0613300-01(-);Os07t0613300-02(-);Os09t0363600-01(OsWD40-171);Os07t0692800-00(-);Os07t0685400-01(-)	K14293+K14288+K14288+K13175+K03237+K14317
Metabolism	Energy metabolism	Carbon fixation in photosynthetic organisms	3	152	0.72437	0.980188	ko00710	Os03t0781400-02(-);Os03t0781400-01(-);Os12t0169600-01(-)	K01807+K01807+K01623
Metabolism	Amino acid metabolism	Arginine biosynthesis	1	56	0.751573	0.980188	ko00220	Os03t0712800-02(OsGS1)	K01915
Metabolism	Metabolism of other amino acids	Glutathione metabolism	3	161	0.759722	0.980188	ko00480	Os12t0178100-01(OsAPx6);Os10t0529400-01(OsGSTU9);Os10t0530500-01(OsGSTU13)	K00434+K00799+K00799
Metabolism	Lipid metabolism	Fatty acid biosynthesis	1	58	0.763672	0.980188	ko00061	Os04t0643300-01(-)	K00648
Environmental Information Processing	Membrane transport	ABC transporters	1	59	0.769501	0.980188	ko02010	Os02t0190000-00(-)	K05658
Metabolism	Metabolism of terpenoids and polyketides	Diterpenoid biosynthesis	1	60	0.775186	0.980188	ko00904	Os04t0517600-00(-)	K04124
Genetic Information Processing	Replication and repair	Base excision repair	1	63	0.791418	0.980188	ko03410	Os05t0579100-01(-)	K01247
Metabolism	Lipid metabolism	Glycerophospholipid metabolism	3	175	0.807375	0.980188	ko00564	Os10t0163310-01(-);Os12t0576900-01(-);Os08t0557200-01(-)	K06129+K00901+K01517
Metabolism	Amino acid metabolism	Cysteine and methionine metabolism	3	182	0.828078	0.980188	ko00270	Os04t0650800-01(-);Os03t0338000-01(-);Os03t0760700-01(-)	K00058+K00827+K00133
Metabolism	Biosynthesis of other secondary metabolites	Flavonoid biosynthesis	1	72	0.833446	0.980188	ko00941	Os10t0477900-00(-)	K08695
Genetic Information Processing	Folding, sorting and degradation	RNA degradation	3	186	0.839037	0.980188	ko03018	Os06t0300800-01(OsWD40-128);Os04t0467400-01(OsCAF1-3);Os02t0102900-01(OsCPn60beta2)	K12616+K01148+K04077
Metabolism	Amino acid metabolism	Tyrosine metabolism	1	74	0.841575	0.980188	ko00350	Os11t0210600-01(Adh3)	K00001
Metabolism	Metabolism of cofactors and vitamins	Porphyrin and chlorophyll metabolism	1	74	0.841575	0.980188	ko00860	Os01t0622300-01(HEME)	K01599
Metabolism	Metabolism of terpenoids and polyketides	Terpenoid backbone biosynthesis	1	82	0.870331	0.999506	ko00900	Os02t0603800-01(OsHDS)	K03526
Metabolism	Global and overview maps	2-Oxocarboxylic acid metabolism	1	88	0.888434	0.999506	ko01210	Os03t0760700-01(-)	K00133
Metabolism	Metabolism of other amino acids	Cyanoamino acid metabolism	1	92	0.899082	0.999506	ko00460	Os05t0366800-00(Os5bglu23)	K01188
Metabolism	Carbohydrate metabolism	Pentose and glucuronate interconversions	1	96	0.908719	0.999506	ko00040	Os08t0220400-01(OsPME24)	K01051
Metabolism	Carbohydrate metabolism	Fructose and mannose metabolism	1	102	0.921485	0.999506	ko00051	Os12t0169600-01(-)	K01623
Metabolism	Global and overview maps	Carbon metabolism	7	461	0.94033	0.999506	ko01200	Os03t0713000-00(-);Os04t0650800-01(-);Os02t0525900-01(-);Os02t0525900-02(-);Os03t0781400-02(-);Os03t0781400-01(-);Os12t0169600-01(-)	K01754+K00058+K01895+K01895+K01807+K01807+K01623
Genetic Information Processing	Translation	Ribosome biogenesis in eukaryotes	1	126	0.957076	0.999506	ko03008	Os12t0634800-01(-)	K14546
Cellular Processes	Transport and catabolism	Phagosome	1	129	0.960202	0.999506	ko04145	Os08t0428900-01(-)	K00921
Metabolism	Nucleotide metabolism	Purine metabolism	1	143	0.972047	0.999506	ko00230	Os08t0557200-01(-)	K01517
Genetic Information Processing	Translation	Ribosome	5	403	0.972595	0.999506	ko03010	Os08t0162900-00(-);Os03t0576700-01(RPL13b);Os06t0701400-01(-);Os06t0683200-01(-);Os09t0501200-01(rpL32_9.1)	K02873+K02873+K02942+K02895+K02912
Genetic Information Processing	Translation	mRNA surveillance pathway	1	191	0.991719	0.999506	ko03015	Os09t0542700-00(-)	K11584
Metabolism	Carbohydrate metabolism	Amino sugar and nucleotide sugar metabolism	1	226	0.996606	0.999506	ko00520	Os07t0674100-01(OsUXS6)	K08678
Cellular Processes	Transport and catabolism	Endocytosis	1	249	0.998116	0.999506	ko04144	Os11t0703900-01(HSP70)	K03283
Genetic Information Processing	Transcription	Spliceosome	1	301	0.999506	0.999506	ko03040	Os11t0703900-01(HSP70)	K03283

## Sheet:  ZJ22a-vs-ZJ22b
All enrichment KEGG terms of target of miRNAs between ZJ22a and ZJ22b in the comparison.
KEGG_A_class	KEGG_B_class	Pathway	ZJ22a-vs-ZJ22b (255)	All (7519)	Pvalue	Qvalue	Pathway ID	Genes	K_IDs
Metabolism	Amino acid metabolism	Glycine, serine and threonine metabolism	12	119	0.00067412	0.056687	ko00260	Os03t0713000-00(-);Os05t0549700-02(-);Os05t0549700-01(-);Os03t0338000-01(-);Os03t0760700-01(-);Os07t0182100-01(OsTSA);Os03t0797000-01(-);Os03t0738400-03(OsSHM1);Os03t0738400-01(OsSHM1);Os01t0316100-00(-);Os03t0850400-01(-);Os01t0328700-01(-)	K01754+K01733+K01733+K00827+K00133+K01695+K01695+K00600+K00600+K00306+K00928+K00382
Metabolism	Global and overview maps	Biosynthesis of secondary metabolites	91	2022	0.00105957	0.056687	ko01110	Os07t0412100-01(GBSSII);Os07t0412100-02(GBSSII);Os03t0181500-01(ONI1);Os03t0713000-00(-);Os05t0549700-02(-);Os05t0549700-01(-);Os03t0826600-01(NPC1);Os03t0826600-02(NPC1);Os05t0102000-01(OsJMT1);Os03t0310400-01(-);Os10t0477900-00(-);Os09t0457400-01(Amy3A/B/C*(RAmy3A/B/C));Os02t0603800-01(OsHDS);Os11t0184100-01(-);Os05t0211100-01(CYP51G3);Os05t0211100-02(CYP51G3);Os07t0421300-01(-);Os02t0129600-01…	K13679+K13679+K15397+K01754+K01733+K01733+K01114+K01114+K08241+K01692+K08695+K01176+K03526+K09591+K05917+K05917+K01187+K01177+K09588+K00167+K00167+K00286+K00286+K15227+K22013+K22013+K22013+K15095+K00688+K00128+K00128+K00827+K02552+K13066+K01648+K01648+K01648+K06127+K00454+K00430+K00430+K01599+K00587+K00001+K20623+K00133+K01695+K01695+K09842+K00600+K00600+K10528+K10528+K08695+K09588+K00901+K01194+…
Metabolism	Carbohydrate metabolism	Starch and sucrose metabolism	19	269	0.00191053	0.0681423	ko00500	Os07t0412100-01(GBSSII);Os07t0412100-02(GBSSII);Os09t0457400-01(Amy3A/B/C*(RAmy3A/B/C));Os07t0421300-01(-);Os02t0129600-01(-);Os03t0758100-01(Pho1);Os09t0530200-01(OsGH9B14);Os03t0374600-01(-);Os03t0374600-02(-);Os10t0521000-01(OsTRE);Os08t0409100-01(OsTPP6);Os01t0749400-02(OsTPS2);Os02t0733300-01(OsGH9B1);Os05t0366800-00(Os5bglu23);Os02t0744700-02(OsSSIIb);Os02t0744700-01(OsSSIIb);Os08t0445700-0…	K13679+K13679+K01176+K01187+K01177+K00688+K01179+K19892+K19892+K01194+K01087+K16055+K01179+K01188+K00703+K00703+K16055+K16055+K01179
Metabolism	Amino acid metabolism	Lysine degradation	7	64	0.00567303	0.14459	ko00310	Os03t0310400-01(-);Os02t0730000-02(OsALDH2a);Os02t0730000-01(OsALDH2a);Os08t0400200-00(OsSET30);Os01t0316100-00(-);Os01t0328700-01(-);Os04t0544100-01(OsSET20)	K01692+K00128+K00128+K11420+K00306+K00382+K11420
Metabolism	Metabolism of terpenoids and polyketides	Limonene and pinene degradation	3	12	0.00675656	0.14459	ko00903	Os03t0310400-01(-);Os02t0730000-02(OsALDH2a);Os02t0730000-01(OsALDH2a)	K01692+K00128+K00128
Metabolism	Carbohydrate metabolism	Inositol phosphate metabolism	9	109	0.0114724	0.175975	ko00562	Os03t0826600-01(NPC1);Os03t0826600-02(NPC1);Os03t0230500-01(DSM3);Os02t0822500-04(-);Os02t0822500-03(-);Os02t0822500-01(-);Os06t0561000-01(OsMIOX);Os10t0369900-01(OsINO2);Os03t0737701-01(OsMIK)	K01114+K01114+K00913+K00889+K00889+K00889+K00469+K01858+K19517
Metabolism	Amino acid metabolism	Valine, leucine and isoleucine degradation	7	73	0.0115124	0.175975	ko00280	Os03t0310400-01(-);Os07t0170100-01(-);Os07t0170100-02(-);Os02t0730000-02(OsALDH2a);Os02t0730000-01(OsALDH2a);Os03t0338000-01(-);Os01t0328700-01(-)	K01692+K00167+K00167+K00128+K00128+K00827+K00382
Metabolism	Metabolism of terpenoids and polyketides	Brassinosteroid biosynthesis	4	28	0.0139352	0.186384	ko00905	Os11t0184100-01(-);Os11t0143200-01(OsCPD1);Os09t0264400-01(-);Os12t0139300-01(OsCPD2)	K09591+K09588+K20623+K09588
Metabolism	Lipid metabolism	alpha-Linolenic acid metabolism	7	84	0.023432	0.278581	ko00592	Os05t0102000-01(OsJMT1);Os02t0194700-01(OsLOX1);Os02t0110200-02(HPL3);Os02t0110200-01(HPL3);Os03t0179900-01(OsLOX2);Os03t0132000-01(OsACS4);Os01t0370000-01(OsOPR9)	K08241+K00454+K10528+K10528+K00454+K10526+K05894
Genetic Information Processing	Folding, sorting and degradation	Sulfur relay system	3	21	0.0326446	0.349298	ko04122	Os12t0588900-01(-);Os09t0338400-02(OsISC1);Os09t0338400-01(OsISC1)	K14169+K04487+K04487
Metabolism	Metabolism of other amino acids	Taurine and hypotaurine metabolism	2	11	0.0514966	0.500922	ko00430	Os01t0151500-00(-);Os01t0151400-01(-)	K18592+K18592
Metabolism	Global and overview maps	Metabolic pathways	133	3546	0.0592213	0.528057	ko01100	Os12t0178100-01(OsAPx6);Os07t0412100-01(GBSSII);Os07t0412100-02(GBSSII);Os03t0181500-01(ONI1);Os11t0544800-01(GATB);Os03t0378000-01(-);Os03t0278000-02(UXS);Os03t0278000-01(UXS);Os03t0713000-00(-);Os05t0549700-02(-);Os05t0549700-01(-);Os07t0674100-01(OsUXS6);Os04t0643300-01(-);Os03t0826600-01(NPC1);Os03t0826600-02(NPC1);Os06t0144900-01(-);Os03t0670200-01(-);Os03t0310400-01(-);Os10t0477900-00(-);Os…	K00434+K13679+K13679+K15397+K02434+K01510+K08678+K08678+K01754+K01733+K01733+K08678+K00648+K01114+K01114+K01728+K05284+K01692+K08695+K01176+K03526+K09591+K08912+K05917+K05917+K01187+K01177+K01051+K09588+K00913+K00167+K00167+K01213+K00286+K00286+K15227+K00688+K00128+K00128+K00827+K02552+K01179+K10256+K00889+K00889+K00889+K02641+K02641+K02641+K13066+K01648+K01648+K01648+K00799+K00654+K06127+K00454+…
Metabolism	Carbohydrate metabolism	Propanoate metabolism	4	47	0.0740244	0.581028	ko00640	Os03t0310400-01(-);Os07t0170100-01(-);Os07t0170100-02(-);Os01t0328700-01(-)	K01692+K00167+K00167+K00382
Metabolism	Global and overview maps	Biosynthesis of amino acids	18	369	0.0760224	0.581028	ko01230	Os03t0713000-00(-);Os05t0549700-02(-);Os05t0549700-01(-);Os01t0948400-02(OsP5CR);Os01t0948400-01(OsP5CR);Os06t0542200-01(-);Os03t0760700-01(-);Os07t0182100-01(OsTSA);Os03t0797000-01(-);Os03t0738400-03(OsSHM1);Os03t0738400-01(OsSHM1);Os04t0306400-01(OsRPI);Os01t0276100-01(OsIDHa);Os03t0781400-02(-);Os03t0781400-01(-);Os03t0850400-01(-);Os03t0712800-02(OsGS1);Os12t0169600-01(-)	K01754+K01733+K01733+K00286+K00286+K15227+K00133+K01695+K01695+K00600+K00600+K01807+K00030+K01807+K01807+K00928+K01915+K01623
Genetic Information Processing	Translation	Aminoacyl-tRNA biosynthesis	6	90	0.0845324	0.602998	ko00970	Os11t0544800-01(GATB);Os05t0150900-03(-);Os05t0150900-02(-);Os05t0150900-01(-);Os02t0139600-01(-);Os10t0182000-01(-)	K02434+K01892+K01892+K01892+K22503+K01872
Organismal Systems	Environmental adaptation	Plant-pathogen interaction	16	337	0.108411	0.690757	ko04626	Os06t0191500-01(-);Os03t0181500-01(ONI1);Os04t0618700-01(Os-FLS2);Os07t0681400-01(OsCML24);Os12t0169800-00(OsCDPK28);Os12t0514500-01(-);Os03t0769500-01(-);Os08t0487800-01(-);Os04t0471700-00(OsWRKY35);Os11t0639600-02(-);Os11t0639600-01(-);Os11t0559200-00(Xa21*);Os12t0163100-00(OsCNGC16);Os11t0569733-00(-);Os09t0479600-01(-);Os04t0219600-01(rNBS17)	K13413+K15397+K13420+K13448+K13412+K09487+K13448+K09487+K18835+K13457+K13457+K13437+K05391+K13437+K13457+K13457
Metabolism	Lipid metabolism	Steroid biosynthesis	4	54	0.109746	0.690757	ko00100	Os05t0211100-01(CYP51G3);Os05t0211100-02(CYP51G3);Os03t0136200-01(Ossmt2-1);Os03t0231800-02(-)	K05917+K05917+K08242+K00511
Metabolism	Metabolism of cofactors and vitamins	Vitamin B6 metabolism	2	18	0.122886	0.709013	ko00750	Os05t0549700-02(-);Os05t0549700-01(-)	K01733+K01733
Metabolism	Biosynthesis of other secondary metabolites	Monobactam biosynthesis	2	19	0.134403	0.709013	ko00261	Os03t0760700-01(-);Os03t0850400-01(-)	K00133+K00928
Genetic Information Processing	Transcription	RNA polymerase	4	59	0.139152	0.709013	ko03020	Os04t0492300-01(-);Os03t0646800-01(-);Os03t0646800-02(-);Os03t0845700-01(-)	K03018+K03010+K03010+K03016
Cellular Processes	Transport and catabolism	Autophagy - other eukaryotes	4	59	0.139152	0.709013	ko04136	Os11t0141000-01(-);Os11t0141000-02(-);Os03t0391000-01(OsATG4a);Os04t0682000-01(Atg4)	K17606+K17606+K08342+K08342
Metabolism	Amino acid metabolism	Lysine biosynthesis	2	22	0.170219	0.760791	ko00300	Os03t0760700-01(-);Os03t0850400-01(-)	K00133+K00928
Metabolism	Metabolism of cofactors and vitamins	Ubiquinone and other terpenoid-quinone biosynthesis	4	64	0.171325	0.760791	ko00130	Os09t0361500-01(ICS1);Os01t0976600-01(-);Os06t0656500-01(4CL4);Os06t0656500-02(4CL4)	K02552+K06127+K01904+K01904
Metabolism	Lipid metabolism	Glycerolipid metabolism	7	135	0.174117	0.760791	ko00561	Os11t0683500-01(Os11bglu36);Os11t0683500-02(Os11bglu36);Os02t0730000-02(OsALDH2a);Os02t0730000-01(OsALDH2a);Os12t0576900-01(-);Os02t0714100-01(OsDGAT);Os09t0394700-01(-)	K21362+K21362+K00128+K00128+K00901+K22848+K01054
Metabolism	Carbohydrate metabolism	Citrate cycle (TCA cycle)	5	88	0.178116	0.760791	ko00020	Os01t0300200-01(-);Os01t0300200-03(-);Os01t0300200-02(-);Os01t0276100-01(OsIDHa);Os01t0328700-01(-)	K01648+K01648+K01648+K00030+K00382
Genetic Information Processing	Replication and repair	Mismatch repair	4	66	0.184865	0.760791	ko03430	Os10t0574500-00(-);Os01t0642900-01(SSB);Os01t0204000-02(-);Os01t0204000-01(-)	K10756+K03111+K03504+K03504
Metabolism	Lipid metabolism	Arachidonic acid metabolism	2	24	0.194886	0.770486	ko00590	Os01t0151500-00(-);Os01t0151400-01(-)	K18592+K18592
Metabolism	Metabolism of other amino acids	Cyanoamino acid metabolism	5	92	0.201623	0.770486	ko00460	Os03t0738400-03(OsSHM1);Os03t0738400-01(OsSHM1);Os01t0151500-00(-);Os05t0366800-00(Os5bglu23);Os01t0151400-01(-)	K00600+K00600+K18592+K01188+K18592
Metabolism	Amino acid metabolism	Arginine and proline metabolism	5	95	0.219904	0.788206	ko00330	Os01t0948400-02(OsP5CR);Os01t0948400-01(OsP5CR);Os02t0730000-02(OsALDH2a);Os02t0730000-01(OsALDH2a);Os05t0489100-01(-)	K00286+K00286+K00128+K00128+K00472
Metabolism	Carbohydrate metabolism	Pentose and glucuronate interconversions	5	96	0.226109	0.788206	ko00040	Os06t0144900-01(-);Os08t0220400-01(OsPME24);Os06t0545400-01(OsPGL1);Os06t0545800-01(OsPGL8);Os06t0545200-00(OsPGL10)	K01728+K01051+K01213+K01213+K01213
Metabolism	Metabolism of cofactors and vitamins	Porphyrin and chlorophyll metabolism	4	74	0.242069	0.788206	ko00860	Os04t0692600-02(-);Os04t0692600-01(-);Os04t0692600-03(-);Os01t0622300-01(HEME)	K22013+K22013+K22013+K01599
Metabolism	Lipid metabolism	Fatty acid elongation	3	51	0.249056	0.788206	ko00062	Os03t0181500-01(ONI1);Os06t0299100-01(-);Os04t0483500-01(KCR1)	K15397+K10251+K10251
Metabolism	Lipid metabolism	Biosynthesis of unsaturated fatty acids	3	51	0.249056	0.788206	ko01040	Os02t0716500-03(OsFAD2);Os06t0299100-01(-);Os04t0483500-01(KCR1)	K10256+K10251+K10251
Metabolism	Lipid metabolism	Linoleic acid metabolism	2	30	0.270713	0.788206	ko00591	Os02t0194700-01(OsLOX1);Os03t0179900-01(OsLOX2)	K00454+K00454
Metabolism	Amino acid metabolism	Tryptophan metabolism	5	103	0.270859	0.788206	ko00380	Os03t0310400-01(-);Os02t0730000-02(OsALDH2a);Os02t0730000-01(OsALDH2a);Os12t0512000-01(YUCCA5);Os01t0328700-01(-)	K01692+K00128+K00128+K11816+K00382
Genetic Information Processing	Folding, sorting and degradation	SNARE interactions in vesicular transport	3	54	0.276772	0.788206	ko04130	Os11t0168100-01(-);Os02t0119400-01(-);Os12t0192300-00(-)	K08500+K08501+K08486
Metabolism	Carbohydrate metabolism	Ascorbate and aldarate metabolism	4	79	0.279657	0.788206	ko00053	Os12t0178100-01(OsAPx6);Os02t0730000-02(OsALDH2a);Os02t0730000-01(OsALDH2a);Os06t0561000-01(OsMIOX)	K00434+K00128+K00128+K00469
Metabolism	Amino acid metabolism	Histidine metabolism	2	31	0.283425	0.788206	ko00340	Os02t0730000-02(OsALDH2a);Os02t0730000-01(OsALDH2a)	K00128+K00128
Metabolism	Lipid metabolism	Fatty acid degradation	4	80	0.28729	0.788206	ko00071	Os03t0310400-01(-);Os02t0730000-02(OsALDH2a);Os02t0730000-01(OsALDH2a);Os11t0210600-01(Adh3)	K01692+K00128+K00128+K00001
Metabolism	Metabolism of cofactors and vitamins	One carbon pool by folate	2	32	0.296117	0.792114	ko00670	Os03t0738400-03(OsSHM1);Os03t0738400-01(OsSHM1)	K00600+K00600
Genetic Information Processing	Replication and repair	DNA replication	4	83	0.310353	0.806335	ko03030	Os10t0574500-00(-);Os01t0642900-01(SSB);Os01t0204000-02(-);Os01t0204000-01(-)	K10756+K03111+K03504+K03504
Metabolism	Glycan biosynthesis and metabolism	Glycosylphosphatidylinositol(GPI)-anchor biosynthesis	2	34	0.321389	0.806335	ko00563	Os03t0670200-01(-);Os12t0596900-01(-)	K05284+K07541
Metabolism	Global and overview maps	Fatty acid metabolism	5	111	0.324041	0.806335	ko01212	Os04t0643300-01(-);Os03t0310400-01(-);Os02t0716500-03(OsFAD2);Os06t0299100-01(-);Os04t0483500-01(KCR1)	K00648+K01692+K10256+K10251+K10251
Cellular Processes	Transport and catabolism	Endocytosis	10	249	0.337253	0.806596	ko04144	Os11t0703900-01(HSP70);Os12t0104766-00(-);Os02t0822500-04(-);Os02t0822500-03(-);Os02t0822500-01(-);Os03t0381200-02(-);Os03t0381200-01(-);Os08t0175200-02(-);Os08t0175200-01(-);Os11t0104866-00(-)	K03283+K04646+K00889+K00889+K00889+K10365+K10365+K19476+K19476+K04646
Metabolism	Metabolism of terpenoids and polyketides	Monoterpenoid biosynthesis	1	12	0.339223	0.806596	ko00902	Os04t0531750-00(-)	K15095
Environmental Information Processing	Signal transduction	Phosphatidylinositol signaling system	5	115	0.35109	0.813315	ko04070	Os03t0230500-01(DSM3);Os02t0822500-04(-);Os02t0822500-03(-);Os02t0822500-01(-);Os12t0576900-01(-)	K00913+K00889+K00889+K00889+K00901
Genetic Information Processing	Replication and repair	Base excision repair	3	63	0.360971	0.813315	ko03410	Os01t0801000-01(-);Os01t0204000-02(-);Os01t0204000-01(-)	K01142+K03504+K03504
Metabolism	Metabolism of cofactors and vitamins	Thiamine metabolism	2	38	0.37117	0.813315	ko00730	Os09t0338400-02(OsISC1);Os09t0338400-01(OsISC1)	K04487+K04487
Metabolism	Carbohydrate metabolism	Pentose phosphate pathway	4	91	0.372453	0.813315	ko00030	Os04t0306400-01(OsRPI);Os03t0781400-02(-);Os03t0781400-01(-);Os12t0169600-01(-)	K01807+K01807+K01807+K01623
Genetic Information Processing	Folding, sorting and degradation	Protein processing in endoplasmic reticulum	13	345	0.388265	0.830886	ko04141	Os07t0409500-01(OSK21);Os10t0542200-01(-);Os11t0703900-01(HSP70);Os03t0267000-00(OsHSP18.0-CI);Os12t0514500-01(-);Os08t0487800-01(-);Os03t0266900-02(OsHsp17.3);Os07t0692800-00(-);Os06t0219500-00(-);Os07t0471000-01(IRE1);Os03t0131300-01(-);Os03t0131300-02(-);Os02t0711300-01(-)	K03094+K04523+K03283+K13993+K09487+K09487+K13993+K03237+K13993+K08852+K04523+K04523+K13993
Metabolism	Amino acid metabolism	Phenylalanine, tyrosine and tryptophan biosynthesis	3	70	0.425589	0.876497	ko00400	Os06t0542200-01(-);Os07t0182100-01(OsTSA);Os03t0797000-01(-)	K15227+K01695+K01695
Metabolism	Metabolism of terpenoids and polyketides	Carotenoid biosynthesis	2	43	0.431222	0.876497	ko00906	Os07t0282300-01(OsAAO3);Os04t0448950-01(-)	K09842+K09838
Genetic Information Processing	Replication and repair	Homologous recombination	4	99	0.434153	0.876497	ko03440	Os01t0106700-00(-);Os01t0642900-01(SSB);Os01t0204000-02(-);Os01t0204000-01(-)	K04728+K03111+K03504+K03504
Organismal Systems	Environmental adaptation	Circadian rhythm - plant	3	73	0.452622	0.88183	ko04712	Os06t0694000-01(OsZTL2);Os01t0566100-01(OsELF3.2);Os01t0566100-02(OsELF3.2)	K12115+K12125+K12125
Genetic Information Processing	Replication and repair	Nucleotide excision repair	4	102	0.456901	0.88183	ko03420	Os10t0574500-00(-);Os01t0204000-02(-);Os01t0204000-01(-);Os01t0636700-01(CSB)	K10756+K03504+K03504+K10841
Metabolism	Metabolism of other amino acids	beta-Alanine metabolism	3	74	0.461518	0.88183	ko00410	Os03t0310400-01(-);Os02t0730000-02(OsALDH2a);Os02t0730000-01(OsALDH2a)	K01692+K00128+K00128
Metabolism	Metabolism of cofactors and vitamins	Folate biosynthesis	2	47	0.477012	0.883897	ko00790	Os01t0238500-01(-);Os01t0238500-02(-)	K18482+K18482
Genetic Information Processing	Folding, sorting and degradation	Protein export	3	76	0.479121	0.883897	ko03060	Os10t0521300-01(-);Os03t0116000-00(-);Os12t0438900-01(-)	K03217+K03217+K12946
Metabolism	Lipid metabolism	Ether lipid metabolism	2	49	0.499056	0.905068	ko00565	Os03t0826600-01(NPC1);Os03t0826600-02(NPC1)	K01114+K01114
Metabolism	Carbohydrate metabolism	Galactose metabolism	3	82	0.530225	0.930067	ko00052	Os07t0421300-01(-);Os08t0495800-01(Osh69);Os08t0495800-02(Osh69)	K01187+K06617+K06617
Metabolism	Metabolism of terpenoids and polyketides	Terpenoid backbone biosynthesis	3	82	0.530225	0.930067	ko00900	Os02t0603800-01(OsHDS);Os04t0602900-02(-);Os06t0678200-01(OsSPS1)	K03526+K00587+K14066
Metabolism	Nucleotide metabolism	Pyrimidine metabolism	3	86	0.562703	0.957341	ko00240	Os03t0378000-01(-);Os04t0105500-02(-);Os04t0105500-01(-)	K01510+K13800+K13800
Metabolism	Metabolism of terpenoids and polyketides	Sesquiterpenoid and triterpenoid biosynthesis	1	24	0.563668	0.957341	ko00909	Os03t0231800-02(-)	K00511
Metabolism	Global and overview maps	2-Oxocarboxylic acid metabolism	3	88	0.578426	0.967055	ko01210	Os03t0760700-01(-);Os01t0276100-01(OsIDHa);Os03t0850400-01(-)	K00133+K00030+K00928
Metabolism	Energy metabolism	Photosynthesis - antenna proteins	1	27	0.606711	0.985141	ko00196	Os09t0346500-04(CAB1R)	K08912
Metabolism	Metabolism of terpenoids and polyketides	Diterpenoid biosynthesis	2	60	0.609175	0.985141	ko00904	Os04t0611700-00(OsKS3);Os04t0517600-00(-)	K04121+K04124
Genetic Information Processing	Translation	Ribosome biogenesis in eukaryotes	4	126	0.623919	0.985141	ko03008	Os12t0634800-01(-);Os11t0545000-03(-);Os11t0545000-01(-);Os03t0735100-01(OsWD40-87)	K14546+K14565+K14565+K14548
Metabolism	Metabolism of other amino acids	Glutathione metabolism	5	161	0.642686	0.985141	ko00480	Os12t0178100-01(OsAPx6);Os10t0529400-01(OsGSTU9);Os01t0151500-00(-);Os01t0151400-01(-);Os10t0530500-01(OsGSTU13)	K00434+K00799+K18592+K18592+K00799
Metabolism	Glycan biosynthesis and metabolism	Other glycan degradation	1	30	0.645523	0.985141	ko00511	Os10t0140200-01(-)	K01191
Metabolism	Energy metabolism	Photosynthesis	3	98	0.65154	0.985141	ko00195	Os02t0103800-02(OsLFNR1);Os02t0103800-01(OsLFNR1);Os02t0103800-03(OsLFNR1)	K02641+K02641+K02641
Metabolism	Amino acid metabolism	Valine, leucine and isoleucine biosynthesis	1	31	0.657593	0.985141	ko00290	Os03t0713000-00(-)	K01754
Metabolism	Biosynthesis of other secondary metabolites	Phenylpropanoid biosynthesis	10	323	0.662899	0.985141	ko00940	Os01t0591300-01(OsALDH2C1);Os12t0199500-00(OsCOMTL1);Os06t0681600-01(prx89);Os06t0681600-02(prx89);Os05t0366800-00(Os5bglu23);Os02t0741200-01(prx31);Os08t0113000-01(prx117);Os06t0547100-00(prx87);Os06t0656500-01(4CL4);Os06t0656500-02(4CL4)	K12355+K13066+K00430+K00430+K01188+K00430+K00430+K00430+K01904+K01904
Metabolism	Carbohydrate metabolism	Glyoxylate and dicarboxylate metabolism	4	135	0.677566	0.993144	ko00630	Os03t0738400-03(OsSHM1);Os03t0738400-01(OsSHM1);Os01t0328700-01(-);Os03t0712800-02(OsGS1)	K00600+K00600+K00382+K01915
Metabolism	Biosynthesis of other secondary metabolites	Flavonoid biosynthesis	2	72	0.707282	0.998783	ko00941	Os10t0477900-00(-);Os04t0630600-00(OsSTA134)	K08695+K08695
Metabolism	Lipid metabolism	Glycerophospholipid metabolism	5	175	0.713808	0.998783	ko00564	Os10t0163310-01(-);Os03t0826600-01(NPC1);Os03t0826600-02(NPC1);Os12t0576900-01(-);Os08t0557200-01(-)	K06129+K01114+K01114+K00901+K01517
Genetic Information Processing	Transcription	Basal transcription factors	2	75	0.728362	0.998783	ko03022	Os09t0534800-01(OsTFIIB);Os09t0534800-02(OsTFIIB)	K03124+K03124
Metabolism	Energy metabolism	Carbon fixation in photosynthetic organisms	4	152	0.763818	0.998783	ko00710	Os04t0306400-01(OsRPI);Os03t0781400-02(-);Os03t0781400-01(-);Os12t0169600-01(-)	K01807+K01807+K01807+K01623
Metabolism	Lipid metabolism	Cutin, suberine and wax biosynthesis	1	43	0.77414	0.998783	ko00073	Os08t0557800-01(-)	K13356
Metabolism	Carbohydrate metabolism	Butanoate metabolism	1	43	0.77414	0.998783	ko00650	Os03t0310400-01(-)	K01692
Genetic Information Processing	Translation	RNA transport	8	290	0.774423	0.998783	ko03013	Os05t0353400-01(OsImpbeta1);Os02t0139200-01(OsPRMT5);Os07t0613300-01(-);Os07t0613300-02(-);Os09t0363600-01(OsWD40-171);Os07t0692800-00(-);Os07t0685400-01(-);Os06t0338900-01(-)	K14293+K02516+K14288+K14288+K13175+K03237+K14317+K03241
Metabolism	Carbohydrate metabolism	Glycolysis / Gluconeogenesis	6	224	0.77784	0.998783	ko00010	Os02t0730000-02(OsALDH2a);Os02t0730000-01(OsALDH2a);Os11t0210600-01(Adh3);Os01t0328700-01(-);Os04t0603000-00(-);Os12t0169600-01(-)	K00128+K00128+K00001+K00382+K01792+K01623
Metabolism	Amino acid metabolism	Alanine, aspartate and glutamate metabolism	2	84	0.784028	0.998783	ko00250	Os03t0338000-01(-);Os03t0712800-02(OsGS1)	K00827+K01915
Metabolism	Glycan biosynthesis and metabolism	Various types of N-glycan biosynthesis	1	46	0.796475	0.998783	ko00513	Os06t0245700-00(-)	K01231
Environmental Information Processing	Signal transduction	MAPK signaling pathway - plant	7	265	0.80162	0.998783	ko04016	Os06t0191500-01(-);Os04t0618700-01(Os-FLS2);Os08t0102900-00(OsVQ32);Os11t0160500-01(OsbZIP81);Os06t0605900-01(OsFbox316);Os06t0203800-01(RLCK204);Os05t0545300-01(-)	K13413+K13420+K20725+K20557+K14515+K20718+K20716
Metabolism	Lipid metabolism	Sphingolipid metabolism	1	51	0.828917	0.998783	ko00600	Os01t0928800-01(OsLCB2a1)	K00654
Metabolism	Energy metabolism	Nitrogen metabolism	1	51	0.828917	0.998783	ko00910	Os03t0712800-02(OsGS1)	K01915
Metabolism	Amino acid metabolism	Arginine biosynthesis	1	56	0.856205	0.998783	ko00220	Os03t0712800-02(OsGS1)	K01915
Cellular Processes	Transport and catabolism	Peroxisome	3	140	0.85953	0.998783	ko04146	Os02t0123200-01(-);Os08t0557800-01(-);Os01t0316100-00(-)	K13335+K13356+K00306
Metabolism	Lipid metabolism	Fatty acid biosynthesis	1	58	0.865864	0.998783	ko00061	Os04t0643300-01(-)	K00648
Metabolism	Nucleotide metabolism	Purine metabolism	3	143	0.869069	0.998783	ko00230	Os03t0378000-01(-);Os08t0557200-01(-);Os05t0349200-01(-)	K01510+K01517+K01490
Environmental Information Processing	Membrane transport	ABC transporters	1	59	0.870449	0.998783	ko02010	Os02t0190000-00(-)	K05658
Metabolism	Glycan biosynthesis and metabolism	N-Glycan biosynthesis	1	64	0.891133	0.998783	ko00510	Os06t0245700-00(-)	K01231
Metabolism	Carbohydrate metabolism	Pyruvate metabolism	3	154	0.899338	0.998783	ko00620	Os02t0730000-02(OsALDH2a);Os02t0730000-01(OsALDH2a);Os01t0328700-01(-)	K00128+K00128+K00382
Genetic Information Processing	Folding, sorting and degradation	Ubiquitin mediated proteolysis	4	201	0.914832	0.998783	ko04120	Os07t0409500-01(OSK21);Os12t0626300-01(APC5);Os01t0719100-02(OsRZFP34);Os01t0719100-04(OsRZFP34)	K03094+K03352+K10144+K10144
Metabolism	Amino acid metabolism	Tyrosine metabolism	1	74	0.923149	0.998783	ko00350	Os11t0210600-01(Adh3)	K00001
Metabolism	Amino acid metabolism	Phenylalanine metabolism	1	74	0.923149	0.998783	ko00360	Os03t0310400-01(-)	K01692
Environmental Information Processing	Signal transduction	Plant hormone signal transduction	8	375	0.945057	0.998783	ko04075	Os06t0191500-01(-);Os03t0639300-01(OsPIL12);Os03t0633500-01(IAA11);Os10t0392400-01(OsTIFY11d);Os06t0605900-01(OsFbox316);Os04t0608300-01(OsSAUR20);Os05t0563400-01(OsARF15);Os09t0280500-01(OsbZIP70)	K13413+K16189+K14484+K13464+K14515+K14488+K14486+K14431
Metabolism	Amino acid metabolism	Cysteine and methionine metabolism	3	182	0.950052	0.998783	ko00270	Os03t0338000-01(-);Os03t0760700-01(-);Os03t0850400-01(-)	K00827+K00133+K00928
Genetic Information Processing	Folding, sorting and degradation	RNA degradation	3	186	0.954958	0.998783	ko03018	Os06t0300800-01(OsWD40-128);Os04t0467400-01(OsCAF1-3);Os02t0102900-01(OsCPn60beta2)	K12616+K01148+K04077
Genetic Information Processing	Folding, sorting and degradation	Proteasome	1	95	0.963071	0.998783	ko03050	Os06t0301300-00(-)	K06699
Metabolism	Carbohydrate metabolism	Fructose and mannose metabolism	1	102	0.971089	0.998783	ko00051	Os12t0169600-01(-)	K01623
Genetic Information Processing	Transcription	Spliceosome	5	301	0.97815	0.998783	ko03040	Os11t0703900-01(HSP70);Os12t0572300-01(-);Os12t0572400-02(-);Os12t0572400-01(-);Os08t0416400-01(-)	K03283+K12900+K12900+K12900+K12822
Metabolism	Global and overview maps	Carbon metabolism	9	461	0.978215	0.998783	ko01200	Os03t0713000-00(-);Os03t0738400-03(OsSHM1);Os03t0738400-01(OsSHM1);Os04t0306400-01(OsRPI);Os01t0276100-01(OsIDHa);Os03t0781400-02(-);Os03t0781400-01(-);Os01t0328700-01(-);Os12t0169600-01(-)	K01754+K00600+K00600+K01807+K00030+K01807+K01807+K00382+K01623
Metabolism	Carbohydrate metabolism	Amino sugar and nucleotide sugar metabolism	3	226	0.984565	0.998783	ko00520	Os03t0278000-02(UXS);Os03t0278000-01(UXS);Os07t0674100-01(OsUXS6)	K08678+K08678+K08678
Genetic Information Processing	Translation	Ribosome	5	403	0.998337	0.998783	ko03010	Os08t0162900-00(-);Os03t0576700-01(RPL13b);Os06t0701400-01(-);Os06t0683200-01(-);Os09t0501200-01(rpL32_9.1)	K02873+K02873+K02942+K02895+K02912
Genetic Information Processing	Translation	mRNA surveillance pathway	1	191	0.998739	0.998783	ko03015	Os09t0542700-00(-)	K11584
Metabolism	Energy metabolism	Oxidative phosphorylation	1	192	0.998783	0.998783	ko00190	Os12t0422971-00(-)	K03936

## Sheet:  ZJ22a-vs-ZJ22c
All enrichment KEGG terms of target of miRNAs between ZJ22a and ZJ22c in the comparison.
KEGG_A_class	KEGG_B_class	Pathway	ZJ22a-vs-ZJ22c (305)	All (7519)	Pvalue	Qvalue	Pathway ID	Genes	K_IDs
Metabolism	Amino acid metabolism	Glycine, serine and threonine metabolism	18	119	1.19866e-06	0.00013425	ko00260	Os04t0136200-00(OsDAO3);Os03t0713000-00(-);Os05t0549700-02(-);Os05t0549700-01(-);Os03t0338000-01(-);Os07t0572100-01(DAO);Os07t0108300-01(ALT-2);Os07t0108300-02(ALT-2);Os03t0760700-01(-);Os07t0182100-01(OsTSA);Os03t0797000-01(-);Os02t0593100-00(OsDAO5);Os03t0738400-03(OsSHM1);Os03t0738400-01(OsSHM1);Os06t0338700-00(-);Os01t0316100-00(-);Os03t0850400-01(-);Os01t0328700-01(-)	K00276+K01754+K01733+K01733+K00827+K00276+K14272+K14272+K00133+K01695+K01695+K00276+K00600+K00600+K00276+K00306+K00928+K00382
Metabolism	Carbohydrate metabolism	Inositol phosphate metabolism	14	109	0.000119419	0.00668746	ko00562	Os03t0826600-01(NPC1);Os03t0826600-02(NPC1);Os12t0141100-01(-);Os12t0141100-02(-);Os07t0658700-01(-);Os03t0230500-01(DSM3);Os02t0822500-04(-);Os02t0822500-03(-);Os02t0822500-01(-);Os11t0145000-01(-);Os06t0561000-01(OsMIOX);Os10t0369900-01(OsINO2);Os03t0737701-01(OsMIK);Os08t0428900-01(-)	K01114+K01114+K00889+K00889+K00889+K00913+K00889+K00889+K00889+K00889+K00469+K01858+K19517+K00921
Metabolism	Global and overview maps	Biosynthesis of secondary metabolites	108	2022	0.000522597	0.0195103	ko01110	Os03t0851800-01(PANC);Os03t0851800-02(PANC);Os07t0412100-01(GBSSII);Os07t0412100-02(GBSSII);Os03t0181500-01(ONI1);Os06t0214850-00(-);Os04t0136200-00(OsDAO3);Os03t0713000-00(-);Os05t0549700-02(-);Os05t0549700-01(-);Os09t0422000-01(HCT3);Os03t0826600-01(NPC1);Os03t0826600-02(NPC1);Os05t0102000-01(OsJMT1);Os03t0310400-01(-);Os10t0477900-00(-);Os09t0457400-01(Amy3A/B/C*(RAmy3A/B/C));Os02t0603800-01(O…	K01918+K01918+K13679+K13679+K15397+K17872+K00276+K01754+K01733+K01733+K13065+K01114+K01114+K08241+K01692+K08695+K01176+K03526+K05917+K05917+K03781+K03781+K01187+K01177+K09588+K00167+K00167+K00286+K00286+K15227+K00430+K22013+K22013+K22013+K15095+K00688+K00128+K00128+K00827+K02552+K00276+K00487+K13066+K01648+K01648+K01648+K06127+K00454+K14272+K14272+K00430+K00430+K01599+K00587+K00001+K20623+K00133+…
Metabolism	Metabolism of other amino acids	beta-Alanine metabolism	10	74	0.000744977	0.0208593	ko00410	Os03t0851800-01(PANC);Os03t0851800-02(PANC);Os04t0136200-00(OsDAO3);Os03t0310400-01(-);Os02t0730000-02(OsALDH2a);Os02t0730000-01(OsALDH2a);Os07t0572100-01(DAO);Os02t0593100-00(OsDAO5);Os01t0710200-01(PAO1);Os06t0338700-00(-)	K01918+K01918+K00276+K01692+K00128+K00128+K00276+K00276+K12259+K00276
Metabolism	Metabolism of terpenoids and polyketides	Limonene and pinene degradation	3	12	0.0110688	0.231269	ko00903	Os03t0310400-01(-);Os02t0730000-02(OsALDH2a);Os02t0730000-01(OsALDH2a)	K01692+K00128+K00128
Metabolism	Carbohydrate metabolism	Starch and sucrose metabolism	19	269	0.0129258	0.231269	ko00500	Os07t0412100-01(GBSSII);Os07t0412100-02(GBSSII);Os09t0457400-01(Amy3A/B/C*(RAmy3A/B/C));Os07t0421300-01(-);Os02t0129600-01(-);Os03t0758100-01(Pho1);Os09t0530200-01(OsGH9B14);Os03t0374600-01(-);Os03t0374600-02(-);Os10t0521000-01(OsTRE);Os08t0409100-01(OsTPP6);Os01t0749400-02(OsTPS2);Os02t0733300-01(OsGH9B1);Os05t0366800-00(Os5bglu23);Os02t0744700-02(OsSSIIb);Os02t0744700-01(OsSSIIb);Os08t0445700-0…	K13679+K13679+K01176+K01187+K01177+K00688+K01179+K19892+K19892+K01194+K01087+K16055+K01179+K01188+K00703+K00703+K16055+K16055+K01179
Metabolism	Amino acid metabolism	Lysine degradation	7	64	0.0144543	0.231269	ko00310	Os03t0310400-01(-);Os02t0730000-02(OsALDH2a);Os02t0730000-01(OsALDH2a);Os08t0400200-00(OsSET30);Os01t0316100-00(-);Os01t0328700-01(-);Os04t0544100-01(OsSET20)	K01692+K00128+K00128+K11420+K00306+K00382+K11420
Environmental Information Processing	Signal transduction	Phosphatidylinositol signaling system	10	115	0.0180288	0.241317	ko04070	Os12t0141100-01(-);Os12t0141100-02(-);Os07t0658700-01(-);Os03t0230500-01(DSM3);Os02t0822500-04(-);Os02t0822500-03(-);Os02t0822500-01(-);Os11t0145000-01(-);Os12t0576900-01(-);Os08t0428900-01(-)	K00889+K00889+K00889+K00913+K00889+K00889+K00889+K00889+K00901+K00921
Metabolism	Global and overview maps	Metabolic pathways	162	3546	0.0193915	0.241317	ko01100	Os03t0851800-01(PANC);Os03t0851800-02(PANC);Os12t0178100-01(OsAPx6);Os07t0412100-01(GBSSII);Os07t0412100-02(GBSSII);Os03t0181500-01(ONI1);Os11t0544800-01(GATB);Os03t0378000-01(-);Os06t0214850-00(-);Os04t0136200-00(OsDAO3);Os09t0528700-00(OsCYP76M7);Os03t0278000-02(UXS);Os03t0278000-01(UXS);Os03t0713000-00(-);Os05t0549700-02(-);Os05t0549700-01(-);Os09t0422000-01(HCT3);Os07t0674100-01(OsUXS6);Os04t…	K01918+K01918+K00434+K13679+K13679+K15397+K02434+K01510+K17872+K00276+K07408+K08678+K08678+K01754+K01733+K01733+K13065+K08678+K00648+K01114+K01114+K01728+K05284+K01692+K00889+K00889+K08695+K01176+K03526+K00889+K08912+K05917+K05917+K03781+K03781+K01187+K01177+K01051+K01184+K01759+K01759+K01759+K01759+K09588+K00913+K00167+K00167+K01213+K00286+K00286+K15227+K00430+K00688+K00128+K00128+K00827+K02552+…
Metabolism	Metabolism of terpenoids and polyketides	Brassinosteroid biosynthesis	4	28	0.0252028	0.282271	ko00905	Os11t0143200-01(OsCPD1);Os09t0264400-01(-);Os12t0139300-01(OsCPD2);Os01t0197100-01(D2)	K09588+K20623+K09588+K09589
Metabolism	Amino acid metabolism	Valine, leucine and isoleucine degradation	7	73	0.0279061	0.284134	ko00280	Os03t0310400-01(-);Os07t0170100-01(-);Os07t0170100-02(-);Os02t0730000-02(OsALDH2a);Os02t0730000-01(OsALDH2a);Os03t0338000-01(-);Os01t0328700-01(-)	K01692+K00167+K00167+K00128+K00128+K00827+K00382
Metabolism	Carbohydrate metabolism	Pentose and glucuronate interconversions	8	96	0.0405312	0.378291	ko00040	Os06t0144900-01(-);Os08t0220400-01(OsPME24);Os11t0249400-00(OsPGL12);Os06t0545400-01(OsPGL1);Os06t0611400-01(OsPGL5);Os06t0545800-01(OsPGL8);Os06t0545200-00(OsPGL10);Os06t0509600-00(-)	K01728+K01051+K01184+K01213+K01213+K01213+K01213+K01213
Metabolism	Metabolism of cofactors and vitamins	Ubiquinone and other terpenoid-quinone biosynthesis	6	64	0.0443899	0.382436	ko00130	Os06t0214850-00(-);Os09t0361500-01(ICS1);Os05t0320700-02(C4H2);Os01t0976600-01(-);Os06t0656500-01(4CL4);Os06t0656500-02(4CL4)	K17872+K02552+K00487+K06127+K01904+K01904
Genetic Information Processing	Folding, sorting and degradation	Sulfur relay system	3	21	0.0511897	0.399504	ko04122	Os12t0588900-01(-);Os09t0338400-02(OsISC1);Os09t0338400-01(OsISC1)	K14169+K04487+K04487
Metabolism	Lipid metabolism	alpha-Linolenic acid metabolism	7	84	0.053505	0.399504	ko00592	Os05t0102000-01(OsJMT1);Os02t0194700-01(OsLOX1);Os02t0110200-02(HPL3);Os02t0110200-01(HPL3);Os03t0179900-01(OsLOX2);Os03t0132000-01(OsACS4);Os01t0370000-01(OsOPR9)	K08241+K00454+K10528+K10528+K00454+K10526+K05894
Metabolism	Amino acid metabolism	Tryptophan metabolism	8	103	0.057228	0.400596	ko00380	Os09t0528700-00(OsCYP76M7);Os03t0310400-01(-);Os03t0131200-01(CATC);Os03t0131200-02(CATC);Os02t0730000-02(OsALDH2a);Os02t0730000-01(OsALDH2a);Os12t0512000-01(YUCCA5);Os01t0328700-01(-)	K07408+K01692+K03781+K03781+K00128+K00128+K11816+K00382
Metabolism	Biosynthesis of other secondary metabolites	Isoquinoline alkaloid biosynthesis	4	41	0.0831465	0.547789	ko00950	Os04t0136200-00(OsDAO3);Os07t0572100-01(DAO);Os02t0593100-00(OsDAO5);Os06t0338700-00(-)	K00276+K00276+K00276+K00276
Organismal Systems	Environmental adaptation	Plant-pathogen interaction	19	337	0.0904884	0.563039	ko04626	Os06t0191500-01(-);Os03t0181500-01(ONI1);Os04t0618700-01(Os-FLS2);Os07t0681400-01(OsCML24);Os12t0169800-00(OsCDPK28);Os12t0514500-01(-);Os03t0769500-01(-);Os08t0487800-01(-);Os04t0471700-00(OsWRKY35);Os11t0639600-02(-);Os11t0639600-01(-);Os11t0559200-00(Xa21*);Os12t0163100-00(OsCNGC16);Os11t0569733-00(-);Os08t0246100-01(-);Os09t0558300-02(OsCNGC15);Os09t0558300-01(OsCNGC15);Os09t0479600-01(-);Os0…	K13413+K15397+K13420+K13448+K13412+K09487+K13448+K09487+K18835+K13457+K13457+K13437+K05391+K13437+K13457+K05391+K05391+K13457+K13457
Metabolism	Global and overview maps	Biosynthesis of amino acids	20	369	0.112761	0.656798	ko01230	Os03t0713000-00(-);Os05t0549700-02(-);Os05t0549700-01(-);Os01t0948400-02(OsP5CR);Os01t0948400-01(OsP5CR);Os06t0542200-01(-);Os07t0108300-01(ALT-2);Os07t0108300-02(ALT-2);Os03t0760700-01(-);Os07t0182100-01(OsTSA);Os03t0797000-01(-);Os03t0738400-03(OsSHM1);Os03t0738400-01(OsSHM1);Os04t0306400-01(OsRPI);Os01t0276100-01(OsIDHa);Os03t0781400-02(-);Os03t0781400-01(-);Os03t0850400-01(-);Os03t0712800-02(…	K01754+K01733+K01733+K00286+K00286+K15227+K14272+K14272+K00133+K01695+K01695+K00600+K00600+K01807+K00030+K01807+K01807+K00928+K01915+K01623
Metabolism	Carbohydrate metabolism	Propanoate metabolism	4	47	0.121857	0.656798	ko00640	Os03t0310400-01(-);Os07t0170100-01(-);Os07t0170100-02(-);Os01t0328700-01(-)	K01692+K00167+K00167+K00382
Genetic Information Processing	Replication and repair	Mismatch repair	5	66	0.128754	0.656798	ko03430	Os09t0407600-01(OsMsh6);Os10t0574500-00(-);Os01t0642900-01(SSB);Os01t0204000-02(-);Os01t0204000-01(-)	K08737+K10756+K03111+K03504+K03504
Cellular Processes	Transport and catabolism	Endocytosis	14	249	0.134713	0.656798	ko04144	Os11t0703900-01(HSP70);Os12t0141100-01(-);Os12t0141100-02(-);Os07t0658700-01(-);Os12t0104766-00(-);Os02t0822500-04(-);Os02t0822500-03(-);Os02t0822500-01(-);Os11t0145000-01(-);Os03t0381200-02(-);Os03t0381200-01(-);Os08t0175200-02(-);Os08t0175200-01(-);Os11t0104866-00(-)	K03283+K00889+K00889+K00889+K04646+K00889+K00889+K00889+K00889+K10365+K10365+K19476+K19476+K04646
Metabolism	Metabolism of cofactors and vitamins	One carbon pool by folate	3	32	0.13865	0.656798	ko00670	Os01t0687500-01(-);Os03t0738400-03(OsSHM1);Os03t0738400-01(OsSHM1)	K00604+K00600+K00600
Metabolism	Biosynthesis of other secondary metabolites	Tropane, piperidine and pyridine alkaloid biosynthesis	4	50	0.143634	0.656798	ko00960	Os04t0136200-00(OsDAO3);Os07t0572100-01(DAO);Os02t0593100-00(OsDAO5);Os06t0338700-00(-)	K00276+K00276+K00276+K00276
Metabolism	Metabolism of cofactors and vitamins	Vitamin B6 metabolism	2	18	0.164162	0.656798	ko00750	Os05t0549700-02(-);Os05t0549700-01(-)	K01733+K01733
Metabolism	Biosynthesis of other secondary metabolites	Flavonoid biosynthesis	5	72	0.166978	0.656798	ko00941	Os09t0422000-01(HCT3);Os10t0477900-00(-);Os05t0320700-02(C4H2);Os04t0630600-00(OsSTA134);Os06t0343600-01(-)	K13065+K08695+K00487+K08695+K22845
Metabolism	Lipid metabolism	Steroid biosynthesis	4	54	0.174816	0.656798	ko00100	Os05t0211100-01(CYP51G3);Os05t0211100-02(CYP51G3);Os03t0136200-01(Ossmt2-1);Os03t0231800-02(-)	K05917+K05917+K08242+K00511
Metabolism	Biosynthesis of other secondary metabolites	Monobactam biosynthesis	2	19	0.17882	0.656798	ko00261	Os03t0760700-01(-);Os03t0850400-01(-)	K00133+K00928
Metabolism	Amino acid metabolism	Tyrosine metabolism	5	74	0.18062	0.656798	ko00350	Os04t0136200-00(OsDAO3);Os07t0572100-01(DAO);Os11t0210600-01(Adh3);Os02t0593100-00(OsDAO5);Os06t0338700-00(-)	K00276+K00276+K00001+K00276+K00276
Metabolism	Amino acid metabolism	Phenylalanine metabolism	5	74	0.18062	0.656798	ko00360	Os04t0136200-00(OsDAO3);Os03t0310400-01(-);Os07t0572100-01(DAO);Os02t0593100-00(OsDAO5);Os06t0338700-00(-)	K00276+K01692+K00276+K00276+K00276
Metabolism	Carbohydrate metabolism	Glyoxylate and dicarboxylate metabolism	8	135	0.181902	0.656798	ko00630	Os03t0131200-01(CATC);Os03t0131200-02(CATC);Os07t0108300-01(ALT-2);Os07t0108300-02(ALT-2);Os03t0738400-03(OsSHM1);Os03t0738400-01(OsSHM1);Os01t0328700-01(-);Os03t0712800-02(OsGS1)	K03781+K03781+K14272+K14272+K00600+K00600+K00382+K01915
Metabolism	Amino acid metabolism	Arginine and proline metabolism	6	95	0.187657	0.656798	ko00330	Os01t0948400-02(OsP5CR);Os01t0948400-01(OsP5CR);Os02t0730000-02(OsALDH2a);Os02t0730000-01(OsALDH2a);Os01t0710200-01(PAO1);Os05t0489100-01(-)	K00286+K00286+K00128+K00128+K12259+K00472
Cellular Processes	Transport and catabolism	Autophagy - other eukaryotes	4	59	0.216647	0.735287	ko04136	Os11t0141000-01(-);Os11t0141000-02(-);Os03t0391000-01(OsATG4a);Os04t0682000-01(Atg4)	K17606+K17606+K08342+K08342
Metabolism	Amino acid metabolism	Lysine biosynthesis	2	22	0.223777	0.737148	ko00300	Os03t0760700-01(-);Os03t0850400-01(-)	K00133+K00928
Metabolism	Carbohydrate metabolism	Citrate cycle (TCA cycle)	5	88	0.285476	0.864012	ko00020	Os01t0300200-01(-);Os01t0300200-03(-);Os01t0300200-02(-);Os01t0276100-01(OsIDHa);Os01t0328700-01(-)	K01648+K01648+K01648+K00030+K00382
Metabolism	Global and overview maps	2-Oxocarboxylic acid metabolism	5	88	0.285476	0.864012	ko01210	Os07t0108300-01(ALT-2);Os07t0108300-02(ALT-2);Os03t0760700-01(-);Os01t0276100-01(OsIDHa);Os03t0850400-01(-)	K14272+K14272+K00133+K00030+K00928
Metabolism	Global and overview maps	Fatty acid metabolism	6	111	0.295007	0.864012	ko01212	Os04t0643300-01(-);Os03t0310400-01(-);Os02t0716500-03(OsFAD2);Os05t0435700-01(-);Os06t0299100-01(-);Os04t0483500-01(KCR1)	K00648+K01692+K10256+K02372+K10251+K10251
Metabolism	Lipid metabolism	Glycerolipid metabolism	7	135	0.307651	0.864012	ko00561	Os11t0683500-01(Os11bglu36);Os11t0683500-02(Os11bglu36);Os02t0730000-02(OsALDH2a);Os02t0730000-01(OsALDH2a);Os12t0576900-01(-);Os02t0714100-01(OsDGAT);Os09t0394700-01(-)	K21362+K21362+K00128+K00128+K00901+K22848+K01054
Metabolism	Biosynthesis of other secondary metabolites	Phenylpropanoid biosynthesis	15	323	0.331192	0.864012	ko00940	Os09t0422000-01(HCT3);Os01t0591300-01(OsALDH2C1);Os06t0547400-01(prx86);Os05t0320700-02(C4H2);Os12t0199500-00(OsCOMTL1);Os06t0681600-01(prx89);Os06t0681600-02(prx89);Os05t0366800-00(Os5bglu23);Os02t0741200-01(prx31);Os08t0113000-01(prx117);Os06t0547100-00(prx87);Os06t0656500-01(4CL4);Os06t0656500-02(4CL4);Os01t0205900-02(prx2);Os01t0205900-01(prx2)	K13065+K12355+K00430+K00487+K13066+K00430+K00430+K01188+K00430+K00430+K00430+K01904+K01904+K00430+K00430
Metabolism	Lipid metabolism	Fatty acid elongation	3	51	0.342305	0.864012	ko00062	Os03t0181500-01(ONI1);Os06t0299100-01(-);Os04t0483500-01(KCR1)	K15397+K10251+K10251
Metabolism	Lipid metabolism	Biosynthesis of unsaturated fatty acids	3	51	0.342305	0.864012	ko01040	Os02t0716500-03(OsFAD2);Os06t0299100-01(-);Os04t0483500-01(KCR1)	K10256+K10251+K10251
Organismal Systems	Environmental adaptation	Circadian rhythm - plant	4	73	0.343763	0.864012	ko04712	Os06t0694000-01(OsZTL2);Os01t0566100-01(OsELF3.2);Os01t0566100-02(OsELF3.2);Os02t0625000-01(OSCRY2)	K12115+K12125+K12125+K12119
Metabolism	Lipid metabolism	Linoleic acid metabolism	2	30	0.3452	0.864012	ko00591	Os02t0194700-01(OsLOX1);Os03t0179900-01(OsLOX2)	K00454+K00454
Metabolism	Metabolism of cofactors and vitamins	Porphyrin and chlorophyll metabolism	4	74	0.353086	0.864012	ko00860	Os04t0692600-02(-);Os04t0692600-01(-);Os04t0692600-03(-);Os01t0622300-01(HEME)	K22013+K22013+K22013+K01599
Metabolism	Amino acid metabolism	Histidine metabolism	2	31	0.360089	0.864012	ko00340	Os02t0730000-02(OsALDH2a);Os02t0730000-01(OsALDH2a)	K00128+K00128
Genetic Information Processing	Folding, sorting and degradation	Protein export	4	76	0.371729	0.864012	ko03060	Os01t0321300-00(-);Os10t0521300-01(-);Os03t0116000-00(-);Os12t0438900-01(-)	K03070+K03217+K03217+K12946
Genetic Information Processing	Folding, sorting and degradation	SNARE interactions in vesicular transport	3	54	0.375906	0.864012	ko04130	Os11t0168100-01(-);Os02t0119400-01(-);Os12t0192300-00(-)	K08500+K08501+K08486
Metabolism	Biosynthesis of other secondary metabolites	Stilbenoid, diarylheptanoid and gingerol biosynthesis	2	33	0.389473	0.864012	ko00945	Os09t0422000-01(HCT3);Os05t0320700-02(C4H2)	K13065+K00487
Metabolism	Metabolism of terpenoids and polyketides	Monoterpenoid biosynthesis	1	12	0.391821	0.864012	ko00902	Os04t0531750-00(-)	K15095
Metabolism	Amino acid metabolism	Arginine biosynthesis	3	56	0.398123	0.864012	ko00220	Os07t0108300-01(ALT-2);Os07t0108300-02(ALT-2);Os03t0712800-02(OsGS1)	K14272+K14272+K01915
Metabolism	Carbohydrate metabolism	Ascorbate and aldarate metabolism	4	79	0.399611	0.864012	ko00053	Os12t0178100-01(OsAPx6);Os02t0730000-02(OsALDH2a);Os02t0730000-01(OsALDH2a);Os06t0561000-01(OsMIOX)	K00434+K00128+K00128+K00469
Metabolism	Glycan biosynthesis and metabolism	Glycosylphosphatidylinositol(GPI)-anchor biosynthesis	2	34	0.403942	0.864012	ko00563	Os03t0670200-01(-);Os11t0479232-01(-)	K05284+K05292
Metabolism	Lipid metabolism	Fatty acid degradation	4	80	0.408863	0.864012	ko00071	Os03t0310400-01(-);Os02t0730000-02(OsALDH2a);Os02t0730000-01(OsALDH2a);Os11t0210600-01(Adh3)	K01692+K00128+K00128+K00001
Genetic Information Processing	Transcription	RNA polymerase	3	59	0.431022	0.872864	ko03020	Os03t0646800-01(-);Os03t0646800-02(-);Os03t0845700-01(-)	K03010+K03010+K03016
Metabolism	Carbohydrate metabolism	Pyruvate metabolism	7	154	0.434428	0.872864	ko00620	Os08t0191700-01(GLYI-11);Os08t0191700-02(GLYI-11);Os08t0191700-03(GLYI-11);Os08t0191700-04(GLYI-11);Os02t0730000-02(OsALDH2a);Os02t0730000-01(OsALDH2a);Os01t0328700-01(-)	K01759+K01759+K01759+K01759+K00128+K00128+K00382
Genetic Information Processing	Replication and repair	DNA replication	4	83	0.436432	0.872864	ko03030	Os10t0574500-00(-);Os01t0642900-01(SSB);Os01t0204000-02(-);Os01t0204000-01(-)	K10756+K03111+K03504+K03504
Metabolism	Amino acid metabolism	Alanine, aspartate and glutamate metabolism	4	84	0.445545	0.875456	ko00250	Os03t0338000-01(-);Os07t0108300-01(ALT-2);Os07t0108300-02(ALT-2);Os03t0712800-02(OsGS1)	K00827+K14272+K14272+K01915
Metabolism	Metabolism of cofactors and vitamins	Thiamine metabolism	2	38	0.460068	0.888407	ko00730	Os09t0338400-02(OsISC1);Os09t0338400-01(OsISC1)	K04487+K04487
Genetic Information Processing	Translation	Aminoacyl-tRNA biosynthesis	4	90	0.499149	0.917447	ko00970	Os11t0544800-01(GATB);Os01t0687500-01(-);Os02t0139600-01(-);Os10t0182000-01(-)	K02434+K00604+K22503+K01872
Metabolism	Metabolism of cofactors and vitamins	Pantothenate and CoA biosynthesis	2	41	0.500092	0.917447	ko00770	Os03t0851800-01(PANC);Os03t0851800-02(PANC)	K01918+K01918
Cellular Processes	Transport and catabolism	Peroxisome	6	140	0.504875	0.917447	ko04146	Os03t0131200-01(CATC);Os03t0131200-02(CATC);Os02t0123200-01(-);Os08t0557800-01(-);Os05t0209400-01(-);Os01t0316100-00(-)	K03781+K03781+K13335+K13356+K17879+K00306
Metabolism	Carbohydrate metabolism	Pentose phosphate pathway	4	91	0.507873	0.917447	ko00030	Os04t0306400-01(OsRPI);Os03t0781400-02(-);Os03t0781400-01(-);Os12t0169600-01(-)	K01807+K01807+K01807+K01623
Metabolism	Metabolism of terpenoids and polyketides	Carotenoid biosynthesis	2	43	0.525699	0.924683	ko00906	Os07t0282300-01(OsAAO3);Os04t0448950-01(-)	K09842+K09838
Genetic Information Processing	Folding, sorting and degradation	Protein processing in endoplasmic reticulum	14	345	0.539598	0.924683	ko04141	Os07t0409500-01(OSK21);Os10t0542200-01(-);Os11t0703900-01(HSP70);Os03t0267000-00(OsHSP18.0-CI);Os01t0851400-01(-);Os12t0514500-01(-);Os08t0487800-01(-);Os03t0266900-02(OsHsp17.3);Os07t0692800-00(-);Os06t0219500-00(-);Os07t0471000-01(IRE1);Os03t0131300-01(-);Os03t0131300-02(-);Os02t0711300-01(-)	K03094+K04523+K03283+K13993+K11863+K09487+K09487+K13993+K03237+K13993+K08852+K04523+K04523+K13993
Genetic Information Processing	Folding, sorting and degradation	Proteasome	4	95	0.54206	0.924683	ko03050	Os02t0634900-01(PAB2);Os06t0699900-01(OsRpn1b);Os02t0325100-01(OsRpt3);Os02t0325100-02(OsRpt3)	K02726+K03028+K03063+K03063
Metabolism	Amino acid metabolism	Phenylalanine, tyrosine and tryptophan biosynthesis	3	70	0.544902	0.924683	ko00400	Os06t0542200-01(-);Os07t0182100-01(OsTSA);Os03t0797000-01(-)	K15227+K01695+K01695
Metabolism	Metabolism of cofactors and vitamins	Folate biosynthesis	2	47	0.574201	0.931485	ko00790	Os01t0238500-01(-);Os01t0238500-02(-)	K18482+K18482
Genetic Information Processing	Replication and repair	Homologous recombination	4	99	0.575	0.931485	ko03440	Os01t0106700-00(-);Os01t0642900-01(SSB);Os01t0204000-02(-);Os01t0204000-01(-)	K04728+K03111+K03504+K03504
Genetic Information Processing	Translation	Ribosome biogenesis in eukaryotes	5	126	0.584309	0.931485	ko03008	Os12t0634800-01(-);Os11t0545000-03(-);Os11t0545000-01(-);Os03t0735100-01(OsWD40-87);Os10t0456900-01(-)	K14546+K14565+K14565+K14548+K14572
Metabolism	Energy metabolism	Carbon fixation in photosynthetic organisms	6	152	0.586162	0.931485	ko00710	Os07t0108300-01(ALT-2);Os07t0108300-02(ALT-2);Os04t0306400-01(OsRPI);Os03t0781400-02(-);Os03t0781400-01(-);Os12t0169600-01(-)	K14272+K14272+K01807+K01807+K01807+K01623
Metabolism	Lipid metabolism	Ether lipid metabolism	2	49	0.597066	0.931485	ko00565	Os03t0826600-01(NPC1);Os03t0826600-02(NPC1)	K01114+K01114
Genetic Information Processing	Replication and repair	Nucleotide excision repair	4	102	0.598812	0.931485	ko03420	Os10t0574500-00(-);Os01t0204000-02(-);Os01t0204000-01(-);Os01t0636700-01(CSB)	K10756+K03504+K03504+K10841
Metabolism	Metabolism of cofactors and vitamins	Biotin metabolism	1	24	0.630419	0.949385	ko00780	Os05t0435700-01(-)	K02372
Metabolism	Metabolism of terpenoids and polyketides	Sesquiterpenoid and triterpenoid biosynthesis	1	24	0.630419	0.949385	ko00909	Os03t0231800-02(-)	K00511
Environmental Information Processing	Signal transduction	MAPK signaling pathway - plant	10	265	0.639358	0.949385	ko04016	Os06t0191500-01(-);Os04t0618700-01(Os-FLS2);Os08t0102900-00(OsVQ32);Os11t0160500-01(OsbZIP81);Os03t0131200-01(CATC);Os03t0131200-02(CATC);Os06t0605900-01(OsFbox316);Os06t0203800-01(RLCK204);Os02t0666300-01(YDA2);Os05t0545300-01(-)	K13413+K13420+K20725+K20557+K03781+K03781+K14515+K20718+K20717+K20716
Metabolism	Carbohydrate metabolism	Galactose metabolism	3	82	0.652702	0.949385	ko00052	Os07t0421300-01(-);Os08t0495800-01(Osh69);Os08t0495800-02(Osh69)	K01187+K06617+K06617
Metabolism	Metabolism of terpenoids and polyketides	Terpenoid backbone biosynthesis	3	82	0.652702	0.949385	ko00900	Os02t0603800-01(OsHDS);Os04t0602900-02(-);Os06t0678200-01(OsSPS1)	K03526+K00587+K14066
Metabolism	Energy metabolism	Photosynthesis - antenna proteins	1	27	0.673732	0.952729	ko00196	Os09t0346500-04(CAB1R)	K08912
Metabolism	Nucleotide metabolism	Pyrimidine metabolism	3	86	0.684319	0.952729	ko00240	Os03t0378000-01(-);Os04t0105500-02(-);Os04t0105500-01(-)	K01510+K13800+K13800
Metabolism	Lipid metabolism	Fatty acid biosynthesis	2	58	0.68853	0.952729	ko00061	Os04t0643300-01(-);Os05t0435700-01(-)	K00648+K02372
Environmental Information Processing	Membrane transport	ABC transporters	2	59	0.697565	0.952729	ko02010	Os02t0190000-00(-);Os02t0693700-02(OsABCB11)	K05658+K05658
Metabolism	Metabolism of terpenoids and polyketides	Diterpenoid biosynthesis	2	60	0.706383	0.952729	ko00904	Os04t0611700-00(OsKS3);Os04t0517600-00(-)	K04121+K04124
Metabolism	Glycan biosynthesis and metabolism	Other glycan degradation	1	30	0.711984	0.952729	ko00511	Os10t0140200-01(-)	K01191
Metabolism	Amino acid metabolism	Valine, leucine and isoleucine biosynthesis	1	31	0.723714	0.952729	ko00290	Os03t0713000-00(-)	K01754
Metabolism	Metabolism of other amino acids	Cyanoamino acid metabolism	3	92	0.72765	0.952729	ko00460	Os03t0738400-03(OsSHM1);Os03t0738400-01(OsSHM1);Os05t0366800-00(Os5bglu23)	K00600+K00600+K01188
Genetic Information Processing	Replication and repair	Base excision repair	2	63	0.731559	0.952729	ko03410	Os01t0204000-02(-);Os01t0204000-01(-)	K03504+K03504
Genetic Information Processing	Translation	RNA transport	10	290	0.746656	0.961212	ko03013	Os07t0124500-01(eIF-3c);Os02t0139200-01(OsPRMT5);Os07t0613300-01(-);Os07t0613300-02(-);Os09t0363600-01(OsWD40-171);Os07t0692800-00(-);Os07t0685400-01(-);Os03t0225500-02(NUP133);Os03t0225500-01(NUP133);Os06t0338900-01(-)	K03252+K02516+K14288+K14288+K13175+K03237+K14317+K14300+K14300+K03241
Metabolism	Energy metabolism	Photosynthesis	3	98	0.766197	0.975159	ko00195	Os02t0103800-02(OsLFNR1);Os02t0103800-01(OsLFNR1);Os02t0103800-03(OsLFNR1)	K02641+K02641+K02641
Genetic Information Processing	Transcription	Basal transcription factors	2	75	0.814638	0.994024	ko03022	Os09t0534800-01(OsTFIIB);Os09t0534800-02(OsTFIIB)	K03124+K03124
Genetic Information Processing	Folding, sorting and degradation	Ubiquitin mediated proteolysis	6	201	0.831667	0.994024	ko04120	Os07t0409500-01(OSK21);Os01t0123800-00(-);Os12t0626300-01(APC5);Os01t0719100-02(OsRZFP34);Os01t0719100-04(OsRZFP34);Os01t0761900-00(-)	K03094+K04506+K03352+K10144+K10144+K04506
Metabolism	Lipid metabolism	Cutin, suberine and wax biosynthesis	1	43	0.832322	0.994024	ko00073	Os08t0557800-01(-)	K13356
Metabolism	Carbohydrate metabolism	Butanoate metabolism	1	43	0.832322	0.994024	ko00650	Os03t0310400-01(-)	K01692
Metabolism	Metabolism of terpenoids and polyketides	Zeatin biosynthesis	1	43	0.832322	0.994024	ko00908	Os01t0688300-00(OsIPT8)	K10760
Environmental Information Processing	Signal transduction	Plant hormone signal transduction	12	375	0.840964	0.994024	ko04075	Os06t0191500-01(-);Os03t0265500-01(OsCOI2);Os03t0265500-02(OsCOI2);Os03t0639300-01(OsPIL12);Os03t0633500-01(IAA11);Os10t0392400-01(OsTIFY11d);Os06t0605900-01(OsFbox316);Os04t0608300-01(OsSAUR20);Os05t0563400-01(OsARF15);Os04t0604900-01(OsXTH16);Os01t0753500-01(OsARF3);Os09t0280500-01(OsbZIP70)	K13413+K13463+K13463+K16189+K14484+K13464+K14515+K14488+K14486+K14504+K14486+K14431
Metabolism	Lipid metabolism	Glycerophospholipid metabolism	5	175	0.844534	0.994024	ko00564	Os10t0163310-01(-);Os03t0826600-01(NPC1);Os03t0826600-02(NPC1);Os12t0576900-01(-);Os08t0557200-01(-)	K06129+K01114+K01114+K00901+K01517
Metabolism	Glycan biosynthesis and metabolism	Various types of N-glycan biosynthesis	1	46	0.852021	0.994024	ko00513	Os06t0245700-00(-)	K01231
Metabolism	Lipid metabolism	Sphingolipid metabolism	1	51	0.879859	0.99981	ko00600	Os01t0928800-01(OsLCB2a1)	K00654
Metabolism	Energy metabolism	Nitrogen metabolism	1	51	0.879859	0.99981	ko00910	Os03t0712800-02(OsGS1)	K01915
Metabolism	Carbohydrate metabolism	Glycolysis / Gluconeogenesis	6	224	0.897854	0.99981	ko00010	Os02t0730000-02(OsALDH2a);Os02t0730000-01(OsALDH2a);Os11t0210600-01(Adh3);Os01t0328700-01(-);Os04t0603000-00(-);Os12t0169600-01(-)	K00128+K00128+K00001+K00382+K01792+K01623
Metabolism	Glycan biosynthesis and metabolism	N-Glycan biosynthesis	1	64	0.930165	0.99981	ko00510	Os06t0245700-00(-)	K01231
Metabolism	Global and overview maps	Carbon metabolism	13	461	0.940961	0.99981	ko01200	Os03t0713000-00(-);Os03t0131200-01(CATC);Os03t0131200-02(CATC);Os07t0108300-01(ALT-2);Os07t0108300-02(ALT-2);Os03t0738400-03(OsSHM1);Os03t0738400-01(OsSHM1);Os04t0306400-01(OsRPI);Os01t0276100-01(OsIDHa);Os03t0781400-02(-);Os03t0781400-01(-);Os01t0328700-01(-);Os12t0169600-01(-)	K01754+K03781+K03781+K14272+K14272+K00600+K00600+K01807+K00030+K01807+K01807+K00382+K01623
Metabolism	Metabolism of other amino acids	Glutathione metabolism	3	161	0.962221	0.99981	ko00480	Os12t0178100-01(OsAPx6);Os10t0529400-01(OsGSTU9);Os10t0530500-01(OsGSTU13)	K00434+K00799+K00799
Metabolism	Amino acid metabolism	Cysteine and methionine metabolism	3	182	0.980702	0.99981	ko00270	Os03t0338000-01(-);Os03t0760700-01(-);Os03t0850400-01(-)	K00827+K00133+K00928
Metabolism	Nucleotide metabolism	Purine metabolism	2	143	0.981864	0.99981	ko00230	Os03t0378000-01(-);Os08t0557200-01(-)	K01510+K01517
Genetic Information Processing	Folding, sorting and degradation	RNA degradation	3	186	0.983066	0.99981	ko03018	Os06t0300800-01(OsWD40-128);Os04t0467400-01(OsCAF1-3);Os02t0102900-01(OsCPn60beta2)	K12616+K01148+K04077
Genetic Information Processing	Translation	mRNA surveillance pathway	3	191	0.985633	0.99981	ko03015	Os09t0542700-00(-);Os08t0305300-02(-);Os08t0305300-01(-)	K11584+K14409+K14409
Metabolism	Carbohydrate metabolism	Fructose and mannose metabolism	1	102	0.985779	0.99981	ko00051	Os12t0169600-01(-)	K01623
Genetic Information Processing	Transcription	Spliceosome	5	301	0.99486	0.99981	ko03040	Os11t0703900-01(HSP70);Os12t0572300-01(-);Os12t0572400-02(-);Os12t0572400-01(-);Os08t0416400-01(-)	K03283+K12900+K12900+K12900+K12822
Cellular Processes	Transport and catabolism	Phagosome	1	129	0.995433	0.99981	ko04145	Os08t0428900-01(-)	K00921
Metabolism	Carbohydrate metabolism	Amino sugar and nucleotide sugar metabolism	3	226	0.995595	0.99981	ko00520	Os03t0278000-02(UXS);Os03t0278000-01(UXS);Os07t0674100-01(OsUXS6)	K08678+K08678+K08678
Metabolism	Energy metabolism	Oxidative phosphorylation	1	192	0.999683	0.99981	ko00190	Os12t0422971-00(-)	K03936
Genetic Information Processing	Translation	Ribosome	5	403	0.99981	0.99981	ko03010	Os08t0162900-00(-);Os03t0576700-01(RPL13b);Os06t0701400-01(-);Os06t0683200-01(-);Os09t0501200-01(rpL32_9.1)	K02873+K02873+K02942+K02895+K02912

## Sheet:  ZJ22b-vs-ZJ22c
All enrichment KEGG terms of target of miRNAs between ZJ22b and ZJ22c in the comparison.
KEGG_A_class	KEGG_B_class	Pathway	ZJ22b-vs-ZJ22c (180)	All (7519)	Pvalue	Qvalue	Pathway ID	Genes	K_IDs
Metabolism	Amino acid metabolism	Glycine, serine and threonine metabolism	12	119	2.50318e-05	0.00242808	ko00260	Os03t0713000-00(-);Os05t0549700-02(-);Os05t0549700-01(-);Os03t0338000-01(-);Os07t0572100-01(DAO);Os03t0760700-01(-);Os07t0182100-01(OsTSA);Os03t0797000-01(-);Os03t0738400-03(OsSHM1);Os03t0738400-01(OsSHM1);Os06t0338700-00(-);Os01t0316100-00(-)	K01754+K01733+K01733+K00827+K00276+K00133+K01695+K01695+K00600+K00600+K00276+K00306
Metabolism	Global and overview maps	Biosynthesis of secondary metabolites	67	2022	0.0013851	0.0603835	ko01110	Os03t0851800-01(PANC);Os03t0851800-02(PANC);Os02t0569400-02(CYP76M8);Os02t0569400-01(CYP76M8);Os06t0214850-00(-);Os11t0495950-00(-);Os03t0713000-00(-);Os05t0549700-02(-);Os05t0549700-01(-);Os09t0422000-01(HCT3);Os05t0102000-01(OsJMT1);Os10t0477900-00(-);Os09t0457400-01(Amy3A/B/C*(RAmy3A/B/C));Os05t0211100-01(CYP51G3);Os05t0211100-02(CYP51G3);Os03t0131200-01(CATC);Os03t0131200-02(CATC);Os11t014320…	K01918+K01918+K16084+K16084+K17872+K22395+K01754+K01733+K01733+K13065+K08241+K08695+K01176+K05917+K05917+K03781+K03781+K09588+K00430+K00128+K00128+K00827+K00276+K00487+K16084+K00133+K01695+K13081+K01695+K10251+K12153+K00600+K00600+K10528+K10528+K09588+K00901+K01194+K01858+K09589+K19517+K10251+K01188+K00454+K16084+K01807+K01807+K00703+K00703+K00703+K00703+K00430+K00430+K04124+K10526+K16055+K16055+…
Metabolism	Metabolism of other amino acids	beta-Alanine metabolism	7	74	0.00186753	0.0603835	ko00410	Os03t0851800-01(PANC);Os03t0851800-02(PANC);Os02t0730000-02(OsALDH2a);Os02t0730000-01(OsALDH2a);Os07t0572100-01(DAO);Os01t0710200-01(PAO1);Os06t0338700-00(-)	K01918+K01918+K00128+K00128+K00276+K12259+K00276
Organismal Systems	Environmental adaptation	Plant-pathogen interaction	16	337	0.00673289	0.163273	ko04626	Os07t0186500-01(-);Os07t0681400-01(OsCML24);Os12t0514500-01(-);Os03t0769500-01(-);Os10t0162854-01(-);Os06t0191300-02(OsMKK5);Os06t0191300-01(OsMKK5);Os11t0639600-02(-);Os11t0639600-01(-);Os11t0227100-00(-);Os12t0500500-01(-);Os11t0569733-00(-);Os09t0270700-00(-);Os11t0224900-00(Os11gRGA3);Os06t0158300-01(-);Os04t0219600-01(rNBS17)	K13457+K13448+K09487+K13448+K13457+K13413+K13413+K13457+K13457+K13457+K13457+K13437+K13457+K13457+K13457+K13457
Metabolism	Carbohydrate metabolism	Starch and sucrose metabolism	13	269	0.0122817	0.226968	ko00500	Os09t0457400-01(Amy3A/B/C*(RAmy3A/B/C));Os09t0530200-01(OsGH9B14);Os03t0374600-01(-);Os03t0374600-02(-);Os10t0521000-01(OsTRE);Os05t0366800-00(Os5bglu23);Os01t0720600-03(SSIVA);Os01t0720600-02(SSIVA);Os01t0720600-04(SSIVA);Os01t0720600-01(SSIVA);Os08t0445700-01(OsTPS8);Os08t0445700-02(OsTPS8);Os05t0129200-00(OsGH9B12)	K01176+K01179+K19892+K19892+K01194+K01188+K00703+K00703+K00703+K00703+K16055+K16055+K01179
Metabolism	Metabolism of terpenoids and polyketides	Diterpenoid biosynthesis	5	60	0.0140392	0.226968	ko00904	Os02t0569400-02(CYP76M8);Os02t0569400-01(CYP76M8);Os06t0599200-01(-);Os02t0569900-01(OsCYP76M7);Os04t0517600-00(-)	K16084+K16084+K16084+K16084+K04124
Metabolism	Metabolism of terpenoids and polyketides	Brassinosteroid biosynthesis	3	28	0.0284944	0.346285	ko00905	Os11t0143200-01(OsCPD1);Os12t0139300-01(OsCPD2);Os01t0197100-01(D2)	K09588+K09588+K09589
Metabolism	Amino acid metabolism	Valine, leucine and isoleucine degradation	5	73	0.0301785	0.346285	ko00280	Os12t0605800-01(OsL55);Os12t0605800-02(OsL55);Os02t0730000-02(OsALDH2a);Os02t0730000-01(OsALDH2a);Os03t0338000-01(-)	K01968+K01968+K00128+K00128+K00827
Metabolism	Metabolism of terpenoids and polyketides	Limonene and pinene degradation	2	12	0.0321295	0.346285	ko00903	Os02t0730000-02(OsALDH2a);Os02t0730000-01(OsALDH2a)	K00128+K00128
Metabolism	Amino acid metabolism	Tryptophan metabolism	6	103	0.0367025	0.347269	ko00380	Os09t0528700-00(OsCYP76M7);Os03t0131200-01(CATC);Os03t0131200-02(CATC);Os02t0730000-02(OsALDH2a);Os02t0730000-01(OsALDH2a);Os12t0512000-01(YUCCA5)	K07408+K03781+K03781+K00128+K00128+K11816
Metabolism	Global and overview maps	Metabolic pathways	97	3546	0.0397512	0.347269	ko01100	Os03t0851800-01(PANC);Os03t0851800-02(PANC);Os06t0131300-01(ADC1);Os06t0214850-00(-);Os09t0528700-00(OsCYP76M7);Os11t0495950-00(-);Os03t0713000-00(-);Os05t0549700-02(-);Os05t0549700-01(-);Os09t0422000-01(HCT3);Os07t0674100-01(OsUXS6);Os12t0605800-01(OsL55);Os12t0605800-02(OsL55);Os03t0294200-01(OsF2KP2);Os03t0294200-02(OsF2KP2);Os10t0477900-00(-);Os09t0457400-01(Amy3A/B/C*(RAmy3A/B/C));Os09t03465…	K01918+K01918+K01583+K17872+K07408+K22395+K01754+K01733+K01733+K13065+K08678+K01968+K01968+K01103+K01103+K08695+K01176+K08912+K05917+K05917+K03781+K03781+K00423+K01051+K01184+K09588+K00729+K00430+K00128+K00128+K00827+K01179+K00276+K00487+K02641+K02641+K02641+K02372+K00799+K01213+K00654+K00133+K01695+K01695+K19892+K19892+K10251+K12153+K00889+K00600+K00600+K09588+K00901+K01194+K22848+K01858+K01054+…
Metabolism	Lipid metabolism	Glycerolipid metabolism	7	135	0.0429612	0.347269	ko00561	Os02t0730000-02(OsALDH2a);Os02t0730000-01(OsALDH2a);Os12t0576900-01(-);Os02t0714100-01(OsDGAT);Os09t0394700-01(-);Os07t0565700-02(-);Os07t0565700-01(-)	K00128+K00128+K00901+K22848+K01054+K01054+K01054
Metabolism	Lipid metabolism	alpha-Linolenic acid metabolism	5	84	0.0504384	0.350246	ko00592	Os05t0102000-01(OsJMT1);Os02t0110200-02(HPL3);Os02t0110200-01(HPL3);Os03t0179900-01(OsLOX2);Os03t0132000-01(OsACS4)	K08241+K10528+K10528+K00454+K10526
Cellular Processes	Transport and catabolism	Peroxisome	7	140	0.0505509	0.350246	ko04146	Os03t0167600-01(OsMS2);Os03t0131200-01(CATC);Os03t0131200-02(CATC);Os09t0314300-01(-);Os09t0314300-02(-);Os05t0209400-01(-);Os01t0316100-00(-)	K13356+K03781+K03781+K13336+K13336+K17879+K00306
Metabolism	Metabolism of cofactors and vitamins	Ubiquinone and other terpenoid-quinone biosynthesis	4	64	0.066611	0.387193	ko00130	Os06t0214850-00(-);Os05t0320700-02(C4H2);Os06t0656500-01(4CL4);Os06t0656500-02(4CL4)	K17872+K00487+K01904+K01904
Metabolism	Amino acid metabolism	Lysine degradation	4	64	0.066611	0.387193	ko00310	Os02t0730000-02(OsALDH2a);Os02t0730000-01(OsALDH2a);Os01t0316100-00(-);Os04t0544100-01(OsSET20)	K00128+K00128+K00306+K11420
Metabolism	Metabolism of cofactors and vitamins	Vitamin B6 metabolism	2	18	0.0678586	0.387193	ko00750	Os05t0549700-02(-);Os05t0549700-01(-)	K01733+K01733
Metabolism	Biosynthesis of other secondary metabolites	Flavonoid biosynthesis	4	72	0.093438	0.503527	ko00941	Os09t0422000-01(HCT3);Os10t0477900-00(-);Os05t0320700-02(C4H2);Os03t0259400-00(OsLAR)	K13065+K08695+K00487+K13081
Metabolism	Global and overview maps	Biosynthesis of amino acids	13	369	0.104326	0.532613	ko01230	Os03t0713000-00(-);Os05t0549700-02(-);Os05t0549700-01(-);Os03t0760700-01(-);Os07t0182100-01(OsTSA);Os03t0797000-01(-);Os03t0738400-03(OsSHM1);Os03t0738400-01(OsSHM1);Os03t0781400-02(-);Os03t0781400-01(-);Os03t0672300-01(-);Os03t0712800-02(OsGS1);Os12t0169600-01(-)	K01754+K01733+K01733+K00133+K01695+K01695+K00600+K00600+K01807+K01807+K00873+K01915+K01623
Metabolism	Lipid metabolism	Steroid biosynthesis	3	54	0.138616	0.672288	ko00100	Os05t0211100-01(CYP51G3);Os05t0211100-02(CYP51G3);Os03t0231800-02(-)	K05917+K05917+K00511
Metabolism	Biosynthesis of other secondary metabolites	Phenylpropanoid biosynthesis	11	323	0.151238	0.684451	ko00940	Os11t0495950-00(-);Os09t0422000-01(HCT3);Os06t0547400-01(prx86);Os05t0320700-02(C4H2);Os05t0366800-00(Os5bglu23);Os02t0741200-01(prx31);Os08t0113000-01(prx117);Os06t0656500-01(4CL4);Os06t0656500-02(4CL4);Os01t0205900-02(prx2);Os01t0205900-01(prx2)	K22395+K13065+K00430+K00487+K01188+K00430+K00430+K01904+K01904+K00430+K00430
Genetic Information Processing	Transcription	RNA polymerase	3	59	0.167166	0.684451	ko03020	Os04t0492300-01(-);Os03t0646800-01(-);Os03t0646800-02(-)	K03018+K03010+K03010
Metabolism	Amino acid metabolism	Histidine metabolism	2	31	0.169229	0.684451	ko00340	Os02t0730000-02(OsALDH2a);Os02t0730000-01(OsALDH2a)	K00128+K00128
Metabolism	Metabolism of cofactors and vitamins	One carbon pool by folate	2	32	0.177826	0.684451	ko00670	Os03t0738400-03(OsSHM1);Os03t0738400-01(OsSHM1)	K00600+K00600
Metabolism	Metabolism of other amino acids	Cyanoamino acid metabolism	4	92	0.178194	0.684451	ko00460	Os03t0570100-01(-);Os03t0738400-03(OsSHM1);Os03t0738400-01(OsSHM1);Os05t0366800-00(Os5bglu23)	K12153+K00600+K00600+K01188
Metabolism	Biosynthesis of other secondary metabolites	Stilbenoid, diarylheptanoid and gingerol biosynthesis	2	33	0.18649	0.684451	ko00945	Os09t0422000-01(HCT3);Os05t0320700-02(C4H2)	K13065+K00487
Metabolism	Amino acid metabolism	Arginine and proline metabolism	4	95	0.192668	0.684451	ko00330	Os06t0131300-01(ADC1);Os02t0730000-02(OsALDH2a);Os02t0730000-01(OsALDH2a);Os01t0710200-01(PAO1)	K01583+K00128+K00128+K12259
Metabolism	Carbohydrate metabolism	Pentose and glucuronate interconversions	4	96	0.197574	0.684451	ko00040	Os08t0220400-01(OsPME24);Os11t0249400-00(OsPGL12);Os06t0611400-01(OsPGL5);Os06t0509600-00(-)	K01051+K01184+K01213+K01213
Metabolism	Carbohydrate metabolism	Glyoxylate and dicarboxylate metabolism	5	135	0.222077	0.736425	ko00630	Os03t0131200-01(CATC);Os03t0131200-02(CATC);Os03t0738400-03(OsSHM1);Os03t0738400-01(OsSHM1);Os03t0712800-02(OsGS1)	K03781+K03781+K00600+K00600+K01915
Metabolism	Carbohydrate metabolism	Fructose and mannose metabolism	4	102	0.22776	0.736425	ko00051	Os03t0294200-01(OsF2KP2);Os03t0294200-02(OsF2KP2);Os06t0652300-00(-);Os12t0169600-01(-)	K01103+K01103+K02377+K01623
Metabolism	Biosynthesis of other secondary metabolites	Glucosinolate biosynthesis	1	12	0.252471	0.756293	ko00966	Os03t0570100-01(-)	K12153
Metabolism	Metabolism of cofactors and vitamins	Pantothenate and CoA biosynthesis	2	41	0.257295	0.756293	ko00770	Os03t0851800-01(PANC);Os03t0851800-02(PANC)	K01918+K01918
Metabolism	Biosynthesis of other secondary metabolites	Isoquinoline alkaloid biosynthesis	2	41	0.257295	0.756293	ko00950	Os07t0572100-01(DAO);Os06t0338700-00(-)	K00276+K00276
Genetic Information Processing	Folding, sorting and degradation	Protein export	3	76	0.273687	0.780812	ko03060	Os01t0321300-00(-);Os10t0521300-01(-);Os03t0116000-00(-)	K03070+K03217+K03217
Metabolism	Carbohydrate metabolism	Ascorbate and aldarate metabolism	3	79	0.293341	0.81265	ko00053	Os06t0567900-01(AO);Os02t0730000-02(OsALDH2a);Os02t0730000-01(OsALDH2a)	K00423+K00128+K00128
Environmental Information Processing	Signal transduction	MAPK signaling pathway - plant	8	265	0.301602	0.81265	ko04016	Os08t0102900-00(OsVQ32);Os03t0131200-01(CATC);Os03t0131200-02(CATC);Os06t0191300-02(OsMKK5);Os06t0191300-01(OsMKK5);Os06t0203800-01(RLCK204);Os02t0666300-01(YDA2);Os05t0545300-01(-)	K20725+K03781+K03781+K13413+K13413+K20718+K20717+K20716
Metabolism	Metabolism of cofactors and vitamins	Folate biosynthesis	2	47	0.310826	0.814868	ko00790	Os01t0238500-01(-);Os01t0238500-02(-)	K18482+K18482
Metabolism	Biosynthesis of other secondary metabolites	Tropane, piperidine and pyridine alkaloid biosynthesis	2	50	0.33734	0.837045	ko00960	Os07t0572100-01(DAO);Os06t0338700-00(-)	K00276+K00276
Metabolism	Lipid metabolism	Fatty acid elongation	2	51	0.346114	0.837045	ko00062	Os04t0116600-01(-);Os04t0483500-01(KCR1)	K10251+K10251
Metabolism	Lipid metabolism	Biosynthesis of unsaturated fatty acids	2	51	0.346114	0.837045	ko01040	Os04t0116600-01(-);Os04t0483500-01(KCR1)	K10251+K10251
Genetic Information Processing	Replication and repair	Non-homologous end-joining	1	18	0.353802	0.837045	ko03450	Os04t0606450-01(OsLig4)	K10777
Metabolism	Biosynthesis of other secondary metabolites	Monobactam biosynthesis	1	19	0.369309	0.839922	ko00261	Os03t0760700-01(-)	K00133
Metabolism	Carbohydrate metabolism	Pentose phosphate pathway	3	91	0.372337	0.839922	ko00030	Os03t0781400-02(-);Os03t0781400-01(-);Os12t0169600-01(-)	K01807+K01807+K01623
Genetic Information Processing	Folding, sorting and degradation	Sulfur relay system	1	21	0.399221	0.862266	ko04122	Os12t0588900-01(-)	K14169
Metabolism	Amino acid metabolism	Lysine biosynthesis	1	22	0.413643	0.862266	ko00300	Os03t0760700-01(-)	K00133
Cellular Processes	Transport and catabolism	Autophagy - other eukaryotes	2	59	0.414697	0.862266	ko04136	Os11t0141000-01(-);Os11t0141000-02(-)	K17606+K17606
Metabolism	Energy metabolism	Photosynthesis	3	98	0.417799	0.862266	ko00195	Os02t0103800-02(OsLFNR1);Os02t0103800-01(OsLFNR1);Os02t0103800-03(OsLFNR1)	K02641+K02641+K02641
Metabolism	Metabolism of cofactors and vitamins	Biotin metabolism	1	24	0.441464	0.873918	ko00780	Os05t0435700-01(-)	K02372
Metabolism	Metabolism of terpenoids and polyketides	Sesquiterpenoid and triterpenoid biosynthesis	1	24	0.441464	0.873918	ko00909	Os03t0231800-02(-)	K00511
Metabolism	Energy metabolism	Photosynthesis - antenna proteins	1	27	0.480751	0.887551	ko00196	Os09t0346500-04(CAB1R)	K08912
Metabolism	Carbohydrate metabolism	Inositol phosphate metabolism	3	109	0.486859	0.887551	ko00562	Os11t0146100-01(-);Os10t0369900-01(OsINO2);Os03t0737701-01(OsMIK)	K00889+K01858+K19517
Metabolism	Global and overview maps	Fatty acid metabolism	3	111	0.499004	0.887551	ko01212	Os05t0435700-01(-);Os04t0116600-01(-);Os04t0483500-01(KCR1)	K02372+K10251+K10251
Metabolism	Amino acid metabolism	Phenylalanine, tyrosine and tryptophan biosynthesis	2	70	0.502725	0.887551	ko00400	Os07t0182100-01(OsTSA);Os03t0797000-01(-)	K01695+K01695
Metabolism	Glycan biosynthesis and metabolism	Other glycan degradation	1	30	0.51729	0.887551	ko00511	Os10t0140200-01(-)	K01191
Metabolism	Lipid metabolism	Linoleic acid metabolism	1	30	0.51729	0.887551	ko00591	Os03t0179900-01(OsLOX2)	K00454
Metabolism	Amino acid metabolism	Valine, leucine and isoleucine biosynthesis	1	31	0.528892	0.887551	ko00290	Os03t0713000-00(-)	K01754
Metabolism	Amino acid metabolism	Tyrosine metabolism	2	74	0.532579	0.887551	ko00350	Os07t0572100-01(DAO);Os06t0338700-00(-)	K00276+K00276
Metabolism	Amino acid metabolism	Phenylalanine metabolism	2	74	0.532579	0.887551	ko00360	Os07t0572100-01(DAO);Os06t0338700-00(-)	K00276+K00276
Genetic Information Processing	Transcription	Basal transcription factors	2	75	0.539851	0.887551	ko03022	Os09t0534800-01(OsTFIIB);Os09t0534800-02(OsTFIIB)	K03124+K03124
Metabolism	Lipid metabolism	Fatty acid degradation	2	80	0.575031	0.929633	ko00071	Os02t0730000-02(OsALDH2a);Os02t0730000-01(OsALDH2a)	K00128+K00128
Metabolism	Carbohydrate metabolism	Galactose metabolism	2	82	0.588548	0.935887	ko00052	Os08t0495800-01(Osh69);Os08t0495800-02(Osh69)	K06617+K06617
Metabolism	Amino acid metabolism	Alanine, aspartate and glutamate metabolism	2	84	0.601745	0.94144	ko00250	Os03t0338000-01(-);Os03t0712800-02(OsGS1)	K00827+K01915
Metabolism	Global and overview maps	2-Oxocarboxylic acid metabolism	2	88	0.627182	0.965662	ko01210	Os03t0760700-01(-);Os03t0570100-01(-)	K00133+K12153
Metabolism	Lipid metabolism	Cutin, suberine and wax biosynthesis	1	43	0.648263	0.967407	ko00073	Os03t0167600-01(OsMS2)	K13356
Metabolism	Metabolism of terpenoids and polyketides	Zeatin biosynthesis	1	43	0.648263	0.967407	ko00908	Os01t0688300-00(OsIPT8)	K10760
Genetic Information Processing	Folding, sorting and degradation	Proteasome	2	95	0.668649	0.969227	ko03050	Os02t0634900-01(PAB2);Os06t0301300-00(-)	K02726+K06699
Metabolism	Energy metabolism	Carbon fixation in photosynthetic organisms	3	152	0.710406	0.969227	ko00710	Os03t0781400-02(-);Os03t0781400-01(-);Os12t0169600-01(-)	K01807+K01807+K01623
Metabolism	Lipid metabolism	Sphingolipid metabolism	1	51	0.710597	0.969227	ko00600	Os01t0928800-01(OsLCB2a1)	K00654
Metabolism	Energy metabolism	Nitrogen metabolism	1	51	0.710597	0.969227	ko00910	Os03t0712800-02(OsGS1)	K01915
Metabolism	Carbohydrate metabolism	Pyruvate metabolism	3	154	0.718731	0.969227	ko00620	Os02t0730000-02(OsALDH2a);Os02t0730000-01(OsALDH2a);Os03t0672300-01(-)	K00128+K00128+K00873
Genetic Information Processing	Folding, sorting and degradation	Protein processing in endoplasmic reticulum	7	345	0.726403	0.969227	ko04141	Os01t0851400-01(-);Os12t0514500-01(-);Os07t0692800-00(-);Os06t0219500-00(-);Os07t0471000-01(IRE1);Os12t0619100-00(OsDjA12);Os02t0711300-01(-)	K11863+K09487+K03237+K13993+K08852+K09503+K13993
Genetic Information Processing	Folding, sorting and degradation	SNARE interactions in vesicular transport	1	54	0.731026	0.969227	ko04130	Os12t0192300-00(-)	K08486
Metabolism	Amino acid metabolism	Arginine biosynthesis	1	56	0.743842	0.969227	ko00220	Os03t0712800-02(OsGS1)	K01915
Metabolism	Lipid metabolism	Fatty acid biosynthesis	1	58	0.75605	0.969227	ko00061	Os05t0435700-01(-)	K02372
Environmental Information Processing	Membrane transport	ABC transporters	1	59	0.761935	0.969227	ko02010	Os02t0693700-02(OsABCB11)	K05658
Environmental Information Processing	Signal transduction	Phosphatidylinositol signaling system	2	115	0.766866	0.969227	ko04070	Os11t0146100-01(-);Os12t0576900-01(-)	K00889+K00901
Metabolism	Global and overview maps	Carbon metabolism	9	461	0.782841	0.969227	ko01200	Os03t0713000-00(-);Os03t0131200-01(CATC);Os03t0131200-02(CATC);Os03t0738400-03(OsSHM1);Os03t0738400-01(OsSHM1);Os03t0781400-02(-);Os03t0781400-01(-);Os03t0672300-01(-);Os12t0169600-01(-)	K01754+K03781+K03781+K00600+K00600+K01807+K01807+K00873+K01623
Metabolism	Glycan biosynthesis and metabolism	N-Glycan biosynthesis	1	64	0.78931	0.969227	ko00510	Os03t0821800-01(-)	K00729
Metabolism	Carbohydrate metabolism	Glycolysis / Gluconeogenesis	4	224	0.78993	0.969227	ko00010	Os02t0730000-02(OsALDH2a);Os02t0730000-01(OsALDH2a);Os03t0672300-01(-);Os12t0169600-01(-)	K00128+K00128+K00873+K01623
Genetic Information Processing	Replication and repair	Mismatch repair	1	66	0.799362	0.969227	ko03430	Os09t0407600-01(OsMsh6)	K08737
Genetic Information Processing	Translation	RNA transport	5	290	0.830361	0.994383	ko03013	Os07t0124500-01(eIF-3c);Os07t0613300-01(-);Os07t0613300-02(-);Os09t0363600-01(OsWD40-171);Os07t0692800-00(-)	K03252+K14288+K14288+K13175+K03237
Metabolism	Nucleotide metabolism	Purine metabolism	2	143	0.861597	0.994917	ko00230	Os03t0672300-01(-);Os05t0349200-01(-)	K00873+K01490
Genetic Information Processing	Replication and repair	DNA replication	1	83	0.867652	0.994917	ko03030	Os12t0242900-01(-)	K02321
Genetic Information Processing	Translation	Aminoacyl-tRNA biosynthesis	1	90	0.888521	0.994917	ko00970	Os02t0139600-01(-)	K22503
Environmental Information Processing	Signal transduction	Plant hormone signal transduction	6	375	0.891956	0.994917	ko04075	Os03t0639300-01(OsPIL12);Os06t0191300-02(OsMKK5);Os06t0191300-01(OsMKK5);Os10t0392400-01(OsTIFY11d);Os04t0604900-01(OsXTH16);Os09t0280500-01(OsbZIP70)	K16189+K13413+K13413+K13464+K14504+K14431
Metabolism	Metabolism of other amino acids	Glutathione metabolism	2	161	0.90241	0.994917	ko00480	Os10t0529400-01(OsGSTU9);Os10t0530500-01(OsGSTU13)	K00799+K00799
Genetic Information Processing	Replication and repair	Nucleotide excision repair	1	102	0.916963	0.994917	ko03420	Os01t0636700-01(CSB)	K10841
Metabolism	Amino acid metabolism	Cysteine and methionine metabolism	2	182	0.935815	0.994917	ko00270	Os03t0338000-01(-);Os03t0760700-01(-)	K00827+K00133
Cellular Processes	Transport and catabolism	Endocytosis	3	249	0.941387	0.994917	ko04144	Os03t0381200-02(-);Os03t0381200-01(-);Os11t0146100-01(-)	K10365+K10365+K00889
Genetic Information Processing	Translation	Ribosome biogenesis in eukaryotes	1	126	0.953996	0.994917	ko03008	Os12t0618300-01(-)	K14539
Genetic Information Processing	Folding, sorting and degradation	Ubiquitin mediated proteolysis	2	201	0.956461	0.994917	ko04120	Os01t0125900-01(OsUBC34);Os01t0761900-00(-)	K10581+K04506
Genetic Information Processing	Translation	Ribosome	5	403	0.96831	0.994917	ko03010	Os08t0162900-00(-);Os03t0576700-01(RPL13b);Os03t0612600-01(-);Os06t0683200-01(-);Os09t0501200-01(rpL32_9.1)	K02873+K02873+K02897+K02895+K02912
Metabolism	Carbohydrate metabolism	Amino sugar and nucleotide sugar metabolism	2	226	0.974162	0.994917	ko00520	Os07t0674100-01(OsUXS6);Os06t0652300-00(-)	K08678+K02377
Metabolism	Lipid metabolism	Glycerophospholipid metabolism	1	175	0.986306	0.994917	ko00564	Os12t0576900-01(-)	K00901
Genetic Information Processing	Folding, sorting and degradation	RNA degradation	1	186	0.989579	0.994917	ko03018	Os06t0300800-01(OsWD40-128)	K12616
Genetic Information Processing	Translation	mRNA surveillance pathway	1	191	0.990797	0.994917	ko03015	Os09t0542700-00(-)	K11584
Genetic Information Processing	Transcription	Spliceosome	2	301	0.994917	0.994917	ko03040	Os08t0492100-02(-);Os08t0416400-01(-)	K12741+K12822
