# Supplementary material for: Whole-Transcriptome Analysis Reveals Autophagy Is Involved in Early Senescence of zj-es Mutant Rice
Source: Front Plant Sci. 2022 Jun 3;13:899054. doi: 10.3389/fpls.2022.899054 (PMC9204060; doi:10.3389/fpls.2022.899054)
Supplement: Supplementary file 7 [file Table_5.XLSX]

## Sheet: GO enrichment
GO enrichment of module turquoise genes
GO ID (level1)	GO Term (level1)	GO ID (level2)	GO Term (level2)	number_of_turquoise (All)	Genes_of_turquoise
GO:0008150	Biological Process	GO:0051179	localization	831	MSTRG.11456(ndhH),MSTRG.13009(NUA),MSTRG.13824(--),MSTRG.1408(atpB),MSTRG.18399(ALA2),MSTRG.18661(DGD1),MSTRG.21297(SFH6),MSTRG.21469(ndhB1),MSTRG.22075(atpB),MSTRG.24928(atpB),MSTRG.25937(HEX6),MSTRG.2641(ABCB11),MSTRG.2736(XI-K),MSTRG.30597(COX1),MSTRG.30605(ATPA),MSTRG.32198(atpH),MSTRG.3270(ndhB1),MSTRG.4058(VPS53),MSTRG.5087(ndhF),MSTRG.7056(Os05g0567100),MSTRG.9084(ndhG),MSTRG.9106(ndhK),MS…
GO:0008150	Biological Process	GO:0044699	single-organism process	2373	MSTRG.10517(NAC021),MSTRG.11068(CALS8),MSTRG.11456(ndhH),MSTRG.11498(--),MSTRG.11499(--),MSTRG.13009(NUA),MSTRG.13059(--),MSTRG.1319(OCT2),MSTRG.13824(--),MSTRG.1408(atpB),MSTRG.15490(SCAB1),MSTRG.1721(CAPH),MSTRG.1793(petA),MSTRG.1828(--),MSTRG.18399(ALA2),MSTRG.18661(DGD1),MSTRG.19312(BGLU15),MSTRG.21469(ndhB1),MSTRG.22075(atpB),MSTRG.24743(KIN14M),MSTRG.24928(atpB),MSTRG.25937(HEX6),MSTRG.2596…
0157500(ROMT9),Os08g0158200(-),Os08g0159500(OsLSD1),Os08g0160500(CSLF6),Os08g0167000(OsABCG18),Os08g0174700(TBP1),Os08g0178100(-),Os08g0178700(-),Os08g0187800(OsGPT1),Os08g0190800(-),Os08g0191000(OsPILS2),Os08g0191600(OsATG8c),Os08g0191700(GLYI-11),Os08g0205400(OsATX1),Os08g0205900(-),Os08g0206600(-),Os08g0232700(OsEXO70FX4),Os08g0236400(OsRLCK248),Os08g0240800(VLN5),Os08g0243500(OsCPR2),Os08g024…
GO:0008150	Biological Process	GO:0048511	rhythmic process	15	Os01g0102900(LIR1),Os01g0182600(GI),Os01g0498200(-),Os02g0115700(CATA1),Os02g0121200(-),Os02g0150800(OsZTL1),Os03g0107800(OsPP42),Os03g0284100(OsPRR73),Os03g0387900(-),Os03g0410300(ELF4_chr.3),Os05g0291700(-),Os06g0727200(CATB),Os07g0695100(Hd2),Os09g0532400(OsPRR95),Os10g0498700(OsMed16_1)
GO:0008150	Biological Process	GO:0009987	cellular process	3248	MSTRG.10063(--),MSTRG.10392(GIP),MSTRG.10517(NAC021),MSTRG.11068(CALS8),MSTRG.11084(--),MSTRG.11273(CLPB1),MSTRG.11417(--),MSTRG.11456(ndhH),MSTRG.11498(--),MSTRG.11499(--),MSTRG.11586(--),MSTRG.13009(NUA),MSTRG.13059(--),MSTRG.1319(OCT2),MSTRG.1408(atpB),MSTRG.14760(--),MSTRG.14792(SIT2),MSTRG.15120(--),MSTRG.1533(TY3B-G),MSTRG.15458(--),MSTRG.15490(SCAB1),MSTRG.16096(--),MSTRG.16778(--),MSTRG.1…
0235300(OsTOR),Os05g0237800(OsLHT8),Os05g0244700(OsAT-IV),Os05g0251500(-),Os05g0253200(-),Os05g0261700(-),Os05g0268500(OsEnS-75),Os05g0270200(OsSAD1),Os05g0274200(-),Os05g0275700(OsRFPHC-15),Os05g0280500(GPAT),Os05g0289400(-),Os05g0295700(-),Os05g0299500(-),Os05g0299700(OsSAP15),Os05g0301600(-),Os05g0302300(JMJ704),Os05g0304100(-),Os05g0304400(OsGDI2),Os05g0304600(OsLOX7),Os05g0305900(-),Os05g030…
GO:0008150	Biological Process	GO:0048518	positive regulation of biological process	234	Os01g0125800(AIP1),Os01g0165000(DREB2A),Os01g0169500(-),Os01g0230200(OsbHLH074),Os01g0239000(-),Os01g0254000(OsARL1d),Os01g0256400(-),Os01g0269100(-),Os01g0283500(OsRhmbd3),Os01g0367700(Orysa),Os01g0542700(OsbZIP04),Os01g0546900(JMJ709),Os01g0547200(-),Os01g0587300(-),Os01g0620100(OsWD40-19),Os01g0648500(-),Os01g0668300(-),Os01g0680400(-),Os01g0749300(HSFA4A),Os01g0753000(EIP8),Os01g0772200(OsTFI…
GO:0008150	Biological Process	GO:0002376	immune system process	38	MSTRG.25968(JUB1),MSTRG.29204(ESP3),MSTRG.32004(NRPD1),MSTRG.6848(--),Os01g0390900(OsDsPTP1),Os01g0527600(SHL2),Os01g0575500(OsWD40-16),Os01g0958700(-),Os02g0234300(OsPUB4),Os02g0327000(OsGAP1),Os02g0475300(-),Os02g0603800(OsHDS),Os02g0629400(-),Os02g0732500(OsARL1b),Os03g0146400(OsPAO),Os03g0270000(-),Os03g0299900(OsAGD2),Os03g0643300(OsOAT),Os03g0698900(-),Os03g0784900(-),Os04g0165700(OsCAS),Os…
GO:0008150	Biological Process	GO:0051704	multi-organism process	133	MSTRG.18661(DGD1),MSTRG.25968(JUB1),MSTRG.27676(CAMTA2),MSTRG.4664(PUB21),Os01g0276800(Gas2),Os01g0279700(OsPT21),Os01g0501700(OsTATC),Os01g0527600(SHL2),Os01g0580100(-),Os01g0642700(-),Os01g0669100(OsLSK1),Os01g0670100(-),Os01g0783800(-),Os01g0853400(OsCOI1a),Os01g0884300(OsNAC6),Os01g0885700(-),Os01g0895100(-),Os01g0923700(HK3),Os01g0934000(OsATG18c),Os01g0960500(-),Os02g0115700(CATA1),Os02g023…
GO:0008150	Biological Process	GO:0050896	response to stimulus	802	MSTRG.10517(NAC021),MSTRG.11273(CLPB1),MSTRG.11498(--),MSTRG.11499(--),MSTRG.13059(--),MSTRG.1359(ATJ15),MSTRG.18126(--),MSTRG.1828(--),MSTRG.18661(DGD1),MSTRG.24228(--),MSTRG.25968(JUB1),MSTRG.27676(CAMTA2),MSTRG.29204(ESP3),MSTRG.30605(ATPA),MSTRG.31000(TPS9),MSTRG.32004(NRPD1),MSTRG.4058(VPS53),MSTRG.4652(MIK2),MSTRG.4664(PUB21),MSTRG.5074(--),MSTRG.6848(--),MSTRG.7056(Os05g0567100),MSTRG.7409…
GO:0008150	Biological Process	GO:0040007	growth	40	Os01g0177200(-),Os01g0203000(-),Os01g0575500(OsWD40-16),Os01g0884300(OsNAC6),Os01g0907400(JMJ705),Os01g0923700(HK3),Os02g0204700(OsCYP734A2),Os02g0596900(-),Os02g0622100(HBD2),Os03g0144800(-),Os03g0183100(BP-73),Os03g0227700(OsDWF4),Os03g0356700(VLN2),Os03g0390700(-),Os03g0681700(OsWD40-81),Os04g0485200(-),Os04g0648800(OsHIP1),Os05g0235300(OsTOR),Os05g0333200(D1),Os05g0593100(-),Os06g0489200(-),O…
GO:0008150	Biological Process	GO:0040011	locomotion	6	Os01g0580100(-),Os02g0742200(OsRac3),Os03g0140500(-),Os06g0234200(OsRAC4),Os08g0544500(LPL3),Os11g0524300(-)
GO:0008150	Biological Process	GO:0023052	signaling	289	MSTRG.10517(NAC021),MSTRG.11498(--),MSTRG.11499(--),MSTRG.18661(DGD1),MSTRG.4652(MIK2),MSTRG.6848(--),Os01g0104000(-),Os01g0178500(OsIAA1),Os01g0186700(-),Os01g0190300(OsIAA2),Os01g0203000(-),Os01g0227300(OsRab7B1),Os01g0231000(OsIAA3),Os01g0253100(-),Os01g0269100(-),Os01g0279300(OsCaM3),Os01g0286100(PIL15),Os01g0296100(-),Os01g0310800(OsWAK4),Os01g0364400(OsRLCK35),Os01g0390900(OsDsPTP1),Os01g05…
GO:0008150	Biological Process	GO:0022610	biological adhesion	1	Os10g0494500(OsRFP)
GO:0008150	Biological Process	GO:0048519	negative regulation of biological process	210	MSTRG.10063(--),MSTRG.11417(--),MSTRG.15120(--),MSTRG.1533(TY3B-G),MSTRG.15458(--),MSTRG.16096(--),MSTRG.16778(--),MSTRG.17045(--),MSTRG.1721(CAPH),MSTRG.18085(--),MSTRG.1828(--),MSTRG.18292(TY3B-I),MSTRG.1868(TY3B-G),MSTRG.1870(--),MSTRG.19587(Rv2228c),MSTRG.2013(--),MSTRG.2030(--),MSTRG.2032(--),MSTRG.20782(Rv2228c),MSTRG.20784(--),MSTRG.23(--),MSTRG.24064(--),MSTRG.24100(Rv2228c),MSTRG.24867(-…
GO:0008150	Biological Process	GO:0008152	metabolic process	2949	MSTRG.10063(--),MSTRG.10392(GIP),MSTRG.10517(NAC021),MSTRG.11068(CALS8),MSTRG.11084(--),MSTRG.11273(CLPB1),MSTRG.11417(--),MSTRG.11456(ndhH),MSTRG.11498(--),MSTRG.11499(--),MSTRG.11586(--),MSTRG.13009(NUA),MSTRG.13059(--),MSTRG.1408(atpB),MSTRG.14760(--),MSTRG.14792(SIT2),MSTRG.15120(--),MSTRG.1533(TY3B-G),MSTRG.15458(--),MSTRG.16096(--),MSTRG.16778(--),MSTRG.17045(--),MSTRG.1721(CAPH),MSTRG.1728…
P32),Os06g0191300(OsMKK5),Os06g0192500(-),Os06g0193400(OsPTF1),Os06g0194900(SUS2),Os06g0196300(OsPrx),Os06g0196700(ARF16),Os06g0199800(OsGPCR),Os06g0207000(-),Os06g0208700(OsPFA-DSP3),Os06g0210200(-),Os06g0210400(-),Os06g0214300(-),Os06g0214800(GID1L2),Os06g0214900(-),Os06g0215200(-),Os06g0216700(OsSCL3),Os06g0218300(-),Os06g0219700(OsFbox304),Os06g0219800(-),Os06g0229200(-),Os06g0229300(HAZ1),Os…
GO:0008150	Biological Process	GO:0065007	biological regulation	1108	MSTRG.10063(--),MSTRG.10517(NAC021),MSTRG.11273(CLPB1),MSTRG.11417(--),MSTRG.11498(--),MSTRG.11499(--),MSTRG.13009(NUA),MSTRG.13059(--),MSTRG.14760(--),MSTRG.15120(--),MSTRG.1533(TY3B-G),MSTRG.15458(--),MSTRG.15490(SCAB1),MSTRG.16096(--),MSTRG.16778(--),MSTRG.17045(--),MSTRG.1721(CAPH),MSTRG.18085(--),MSTRG.1828(--),MSTRG.18292(TY3B-I),MSTRG.18661(DGD1),MSTRG.1868(TY3B-G),MSTRG.1870(--),MSTRG.195…
GO:0008150	Biological Process	GO:0098754	detoxification	36	Os01g0143100(-),Os01g0266600(OsPrxII),Os01g0327100(prx15),Os01g0734200(rbohA),Os01g0835500(rbohE),Os02g0115700(CATA1),Os02g0129800(-),Os02g0192700(Pre),Os02g0635200(NIT1),Os02g0646400(OsGRX10),Os02g0664000(OsGpx3),Os02g0813500(OsGR2),Os03g0121200(prx33),Os03g0351500(SODCC1),Os03g0358100(OsGpx2),Os03g0729300(-),Os03g0762300(-),Os03g0762400(prx51),Os04g0434800(OsAPx7),Os04g0556000(HMA5),Os04g055630…
GO:0008150	Biological Process	GO:0000003	reproduction	137	MSTRG.10517(NAC021),MSTRG.13009(NUA),MSTRG.13059(--),MSTRG.13074(Os02g0750400),MSTRG.2736(XI-K),MSTRG.29204(ESP3),Os01g0169500(-),Os01g0177200(-),Os01g0182600(GI),Os01g0193900(OsALYL1),Os01g0229300(CCP1),Os01g0338100(-),Os01g0390300(-),Os01g0501700(OsTATC),Os01g0527600(SHL2),Os01g0580100(-),Os01g0587300(-),Os01g0642700(-),Os01g0667200(GLYII-1),Os01g0669100(OsLSK1),Os01g0670100(-),Os01g0733600(-),…
GO:0008150	Biological Process	GO:0022414	reproductive process	136	MSTRG.10517(NAC021),MSTRG.13009(NUA),MSTRG.13059(--),MSTRG.13074(Os02g0750400),MSTRG.2736(XI-K),MSTRG.29204(ESP3),Os01g0169500(-),Os01g0177200(-),Os01g0182600(GI),Os01g0229300(CCP1),Os01g0338100(-),Os01g0390300(-),Os01g0501700(OsTATC),Os01g0527600(SHL2),Os01g0580100(-),Os01g0587300(-),Os01g0642700(-),Os01g0667200(GLYII-1),Os01g0669100(OsLSK1),Os01g0670100(-),Os01g0733600(-),Os01g0743400(-),Os01g0…
GO:0008150	Biological Process	GO:0050789	regulation of biological process	1002	MSTRG.10063(--),MSTRG.10517(NAC021),MSTRG.11273(CLPB1),MSTRG.11417(--),MSTRG.11498(--),MSTRG.11499(--),MSTRG.13009(NUA),MSTRG.13059(--),MSTRG.14760(--),MSTRG.15120(--),MSTRG.1533(TY3B-G),MSTRG.15458(--),MSTRG.15490(SCAB1),MSTRG.16096(--),MSTRG.16778(--),MSTRG.17045(--),MSTRG.1721(CAPH),MSTRG.18085(--),MSTRG.1828(--),MSTRG.18292(TY3B-I),MSTRG.18661(DGD1),MSTRG.1868(TY3B-G),MSTRG.1870(--),MSTRG.195…
GO:0008150	Biological Process	GO:0071840	cellular component organization or biogenesis	569	MSTRG.11068(CALS8),MSTRG.11498(--),MSTRG.11499(--),MSTRG.11586(--),MSTRG.13059(--),MSTRG.1721(CAPH),MSTRG.2248(pif1),MSTRG.32004(NRPD1),MSTRG.32198(atpH),MSTRG.3764(NEK5),MSTRG.4058(VPS53),MSTRG.800(--),MSTRG.9475(atpH),Os01g0105800(OsISC9),Os01g0125800(AIP1),Os01g0141100(OsSKD1),Os01g0149600(H2B),Os01g0153100(OsFbox002),Os01g0168500(OsATG18b),Os01g0179400(SSG4),Os01g0191500(-),Os01g0200000(OsATG…
GO:0008150	Biological Process	GO:0032501	multicellular organismal process	207	MSTRG.10517(NAC021),MSTRG.11068(CALS8),MSTRG.13009(NUA),MSTRG.13074(Os02g0750400),MSTRG.25968(JUB1),MSTRG.2736(XI-K),MSTRG.9376(--),Os01g0169500(-),Os01g0177200(-),Os01g0182600(GI),Os01g0197100(D2),Os01g0218032(ROS1A),Os01g0229300(CCP1),Os01g0338100(-),Os01g0527600(SHL2),Os01g0546900(JMJ709),Os01g0575500(OsWD40-16),Os01g0580100(-),Os01g0587300(-),Os01g0642700(-),Os01g0666800(-),Os01g0667200(GLYII…
GO:0008150	Biological Process	GO:0032502	developmental process	220	MSTRG.10517(NAC021),MSTRG.11068(CALS8),MSTRG.11498(--),MSTRG.11499(--),MSTRG.13009(NUA),MSTRG.13059(--),MSTRG.13074(Os02g0750400),MSTRG.25968(JUB1),MSTRG.2736(XI-K),MSTRG.29204(ESP3),MSTRG.9376(--),Os01g0141600(OsRUS5),Os01g0169500(-),Os01g0177200(-),Os01g0182600(GI),Os01g0197100(D2),Os01g0218032(ROS1A),Os01g0229300(CCP1),Os01g0338100(-),Os01g0527600(SHL2),Os01g0546900(JMJ709),Os01g0575500(OsWD40…
GO:0003674	Molecular Function	GO:0005215	transporter activity	431	MSTRG.1319(OCT2),MSTRG.1408(atpB),MSTRG.18399(ALA2),MSTRG.21297(SFH6),MSTRG.22075(atpB),MSTRG.24928(atpB),MSTRG.25937(HEX6),MSTRG.2641(ABCB11),MSTRG.30605(ATPA),MSTRG.32198(atpH),MSTRG.6412(DTX44),MSTRG.9106(ndhK),MSTRG.9475(atpH),Os01g0110100(Pho1),Os01g0121700(-),Os01g0130000(OsMTP9),Os01g0133400(OsPGLCT),Os01g0143100(-),Os01g0167500(-),Os01g0182200(OsSIP1),Os01g0218700(OsABCD1),Os01g0222500(-)…
GO:0003674	Molecular Function	GO:0003824	catalytic activity	2502	MSTRG.10392(GIP),MSTRG.11068(CALS8),MSTRG.11084(--),MSTRG.11273(CLPB1),MSTRG.11279(SIT2),MSTRG.11456(ndhH),MSTRG.11586(--),MSTRG.12705(ART3),MSTRG.13059(--),MSTRG.1408(atpB),MSTRG.14792(SIT2),MSTRG.18062(rpoB),MSTRG.18063(rpoC1),MSTRG.18118(--),MSTRG.18365(TPS7),MSTRG.18374(--),MSTRG.18399(ALA2),MSTRG.18661(DGD1),MSTRG.18730(At1g58060),MSTRG.19312(BGLU15),MSTRG.21469(ndhB1),MSTRG.22075(atpB),MSTR…
G43),Os07g0526600(-),Os07g0529000(OsEnS-107),Os07g0530600(-),Os07g0531600(-),Os07g0532800(-),Os07g0534700(-),Os07g0535800(-),Os07g0537900(-),Os07g0539300(Gns13),Os07g0541000(-),Os07g0541400(-),Os07g0541500(-),Os07g0553633(-),Os07g0561500(-),Os07g0562800(OsMyoVIIIA),Os07g0564100(-),Os07g0565600(OsCYP37),Os07g0566200(OsPP2C64),Os07g0570100(-),Os07g0575600(-),Os07g0575700(SIT3),Os07g0575800(-),Os07g…
GO:0003674	Molecular Function	GO:0000988	transcription factor activity, protein binding	41	Os01g0246100(OsHAC701),Os01g0338100(-),Os01g0648500(-),Os01g0680400(-),Os01g0893400(-),Os01g0920200(-),Os03g0196900(-),Os03g0271100(OsSIG2B),Os03g0641700(OsMED19b),Os03g0707600(SLR1),Os03g0747600(-),Os03g0860000(-),Os04g0271000(osSRT701),Os04g0482300(-),Os05g0100500(-),Os05g0347000(-),Os05g0494100(DRAP2),Os05g0540800(-),Os05g0588700(-),Os06g0688100(-),Os06g0708900(-),Os07g0164600(OsMED31a),Os07g0…
GO:0003674	Molecular Function	GO:0016530	metallochaperone activity	4	Os02g0794600(-),Os03g0351500(SODCC1),Os08g0561700(OsSOD4),Os09g0420700(-)
GO:0003674	Molecular Function	GO:0009055	electron carrier activity	47	MSTRG.30597(COX1),MSTRG.32243(rbcL),Os01g0174900(OsGRX1),Os01g0194600(OsGRX2),Os01g0235900(OsGRL1),Os01g0530400(OsGRX5),Os01g0612200(COXVB),Os01g0860601(-),Os01g0935700(-),Os02g0121800(-),Os02g0618100(OsGRX9),Os02g0646400(OsGRX10),Os02g0813500(OsGR2),Os02g0814400(-),Os03g0356400(OsGRL6),Os03g0429800(-),Os03g0659233(-),Os03g0659266(-),Os03g0713400(-),Os03g0772800(-),Os03g0835400(-),Os03g0835900(Os…
GO:0003674	Molecular Function	GO:0031386	protein tag	3	Os01g0918200(-),Os02g0161900(rubq2),Os02g0628800(-)
GO:0003674	Molecular Function	GO:0060089	molecular transducer activity	59	MSTRG.2738(XI-C),Os01g0104000(-),Os01g0253100(-),Os01g0310800(OsWAK4),Os01g0709500(-),Os01g0923700(HK3),Os01g0936100(OsRLCK55),Os02g0117500(OsGLR3.1),Os02g0176100(-),Os02g0186500(OsRLCK64),Os02g0283800(TMS10),Os02g0629400(-),Os02g0640500(SIT1),Os02g0712700(-),Os02g0738400(OHK5),Os03g0232900(-),Os03g0241600(OsRLCK105),Os03g0309200(PHYB),Os03g0701700(OS-ERS1),Os03g0719800(PHYA),Os03g0724300(-),Os03…
GO:0003674	Molecular Function	GO:0004871	signal transducer activity	65	Os01g0104000(-),Os01g0253100(-),Os01g0310800(OsWAK4),Os01g0709500(-),Os01g0923700(HK3),Os01g0936100(OsRLCK55),Os02g0117500(OsGLR3.1),Os02g0135200(OsMPK13),Os02g0148100(OsMAPK33),Os02g0176100(-),Os02g0186500(OsRLCK64),Os02g0283800(TMS10),Os02g0629400(-),Os02g0640500(SIT1),Os02g0712700(-),Os02g0738400(OHK5),Os03g0232900(-),Os03g0241600(OsRLCK105),Os03g0309200(PHYB),Os03g0701700(OS-ERS1),Os03g071980…
GO:0003674	Molecular Function	GO:0016209	antioxidant activity	36	Os01g0143100(-),Os01g0266600(OsPrxII),Os01g0327100(prx15),Os01g0734200(rbohA),Os01g0835500(rbohE),Os01g0855200(-),Os02g0115700(CATA1),Os02g0192700(Pre),Os02g0618100(OsGRX9),Os02g0646400(OsGRX10),Os02g0664000(OsGpx3),Os02g0753800(ANN2),Os02g0813500(OsGR2),Os03g0121200(prx33),Os03g0351500(SODCC1),Os03g0358100(OsGpx2),Os03g0729300(-),Os03g0762300(-),Os03g0762400(prx51),Os04g0434800(OsAPx7),Os04g0556…
GO:0003674	Molecular Function	GO:0098772	molecular function regulator	82	Os01g0269100(-),Os01g0270100(-),Os01g0600200(-),Os01g0615050(-),Os01g0615100(OCPI2),Os01g0664500(-),Os01g0788400(OsPME6),Os01g0803200(Oc1*),Os01g0813900(-),Os01g0908100(-),Os01g0976000(-),Os02g0133000(CycT1),Os02g0191700(-),Os02g0230100(-),Os02g0327000(OsGAP1),Os02g0600100(-),Os02g0602300(-),Os02g0617600(-),Os02g0644500(OsATG13a),Os02g0709800(OsGAP1),Os02g0722500(-),Os02g0761900(-),Os02g0762400(K…
GO:0003674	Molecular Function	GO:0001071	nucleic acid binding transcription factor activity	157	MSTRG.10517(NAC021),MSTRG.17436(--),Os01g0165000(DREB2A),Os01g0195000(OsIDD2),Os01g0203000(-),Os01g0230200(OsbHLH074),Os01g0239000(-),Os01g0279900(OsbZIP03),Os01g0289600(OsWRKY9),Os01g0542700(OsbZIP04),Os01g0572100(OsC3H7),Os01g0572300(OsIDD11),Os01g0584900(OsWRKY77),Os01g0607400(OsWD40-17),Os01g0626400(WRKY11),Os01g0658900(OsBZ8),Os01g0749300(HSFA4A),Os01g0750100(WRKY13),Os01g0808100(OsbZIP08),O…
GO:0003674	Molecular Function	GO:0005488	binding	2828	MSTRG.10392(GIP),MSTRG.11084(--),MSTRG.11273(CLPB1),MSTRG.11456(ndhH),MSTRG.11498(--),MSTRG.11499(--),MSTRG.12636(ATL4),MSTRG.13009(NUA),MSTRG.1359(ATJ15),MSTRG.1408(atpB),MSTRG.14760(--),MSTRG.14792(SIT2),MSTRG.15038(--),MSTRG.17436(--),MSTRG.1792(ycf4),MSTRG.1793(petA),MSTRG.18062(rpoB),MSTRG.18063(rpoC1),MSTRG.1828(--),MSTRG.18365(TPS7),MSTRG.18399(ALA2),MSTRG.18730(At1g58060),MSTRG.21469(ndhB…
g0495700(-),Os06g0496800(-),Os06g0499900(-),Os06g0501900(CYP76M9),Os06g0506600(OsUBC17),Os06g0507400(-),Os06g0509100(-),Os06g0543200(-),Os06g0543400(OsCIPK25),Os06g0548000(-),Os06g0548100(-),Os06g0549600(-),Os06g0552400(-),Os06g0554700(-),Os06g0564500(-),Os06g0566100(-),Os06g0568200(OsVHA-B),Os06g0568600(OsKO5),Os06g0569500(KO4),Os06g0581500(-),Os06g0586150(-),Os06g0588900(-),Os06g0591600(-),Os06…
GO:0003674	Molecular Function	GO:0045735	nutrient reservoir activity	4	Os03g0693700(OsOxO1),Os03g0693900(OsOxO3),Os03g0694000(Osoxo4),Os05g0116000(-)
GO:0003674	Molecular Function	GO:0005198	structural molecule activity	59	MSTRG.26724(rpl2-A),MSTRG.27933(rpl22),MSTRG.30599(RPL5),MSTRG.32225(RPL5),MSTRG.9463(RPS12),Os01g0105800(OsISC9),Os01g0256600(-),Os01g0620100(OsWD40-19),Os01g0633000(-),Os01g0658500(-),Os01g0678600(-),Os01g0749200(WLP1),Os01g0805000(-),Os01g0805900(OsTUB4),Os01g0815100(-),Os02g0137200(-),Os02g0179800(-),Os02g0523300(-),Os02g0652600(-),Os02g0741500(-),Os02g0822600(-),Os03g0168900(-),Os03g0214600(…
GO:0005575	Cellular Component	GO:0044422	organelle part	958	MSTRG.11273(CLPB1),MSTRG.11456(ndhH),MSTRG.13009(NUA),MSTRG.13824(--),MSTRG.1408(atpB),MSTRG.1792(ycf4),MSTRG.1793(petA),MSTRG.18399(ALA2),MSTRG.18661(DGD1),MSTRG.21469(ndhB1),MSTRG.22075(atpB),MSTRG.24743(KIN14M),MSTRG.24928(atpB),MSTRG.26646(ndhD),MSTRG.26724(rpl2-A),MSTRG.27933(rpl22),MSTRG.30597(COX1),MSTRG.30599(RPL5),MSTRG.30605(ATPA),MSTRG.32004(NRPD1),MSTRG.32198(atpH),MSTRG.32225(RPL5),M…
GO:0005575	Cellular Component	GO:0005623	cell	3088	MSTRG.10063(--),MSTRG.11068(CALS8),MSTRG.11273(CLPB1),MSTRG.11279(SIT2),MSTRG.11417(--),MSTRG.11456(ndhH),MSTRG.11498(--),MSTRG.11499(--),MSTRG.12636(ATL4),MSTRG.13009(NUA),MSTRG.13074(Os02g0750400),MSTRG.13079(--),MSTRG.1359(ATJ15),MSTRG.13600(--),MSTRG.13824(--),MSTRG.1408(atpB),MSTRG.14760(--),MSTRG.14792(SIT2),MSTRG.15120(--),MSTRG.1533(TY3B-G),MSTRG.15458(--),MSTRG.16096(--),MSTRG.16778(--),…
0(-),Os05g0458000(-),Os05g0458400(OsFtsH8),Os05g0460000(OsctHSP70-1),Os05g0460800(-),Os05g0461300(OsRab8A2),Os05g0462600(-),Os05g0465100(-),Os05g0466600(-),Os05g0472300(-),Os05g0474800(OsWRKY70),Os05g0475300(-),Os05g0480000(OsSTN8),Os05g0481500(-),Os05g0486600(BARD1),Os05g0490200(-),Os05g0490700(OsSET22),Os05g0491100(CALa*),Os05g0494100(DRAP2),Os05g0494500(-),Os05g0495700(GPDH1),Os05g0495900(Gns8…
GO:0005575	Cellular Component	GO:0044464	cell part	3055	MSTRG.10063(--),MSTRG.11068(CALS8),MSTRG.11273(CLPB1),MSTRG.11279(SIT2),MSTRG.11417(--),MSTRG.11456(ndhH),MSTRG.11498(--),MSTRG.11499(--),MSTRG.12636(ATL4),MSTRG.13009(NUA),MSTRG.13074(Os02g0750400),MSTRG.13079(--),MSTRG.1359(ATJ15),MSTRG.13600(--),MSTRG.13824(--),MSTRG.1408(atpB),MSTRG.14760(--),MSTRG.14792(SIT2),MSTRG.15120(--),MSTRG.1533(TY3B-G),MSTRG.15458(--),MSTRG.16096(--),MSTRG.16778(--),…
(OsSET22),Os05g0491100(CALa*),Os05g0494100(DRAP2),Os05g0494500(-),Os05g0495700(GPDH1),Os05g0495900(Gns8),Os05g0497300(OsERF#074),Os05g0497700(OsDegp8),Os05g0500000(OsUGT705A2),Os05g0501400(-),Os05g0501600(-),Os05g0503300(-),Os05g0506200(-),Os05g0508300(-),Os05g0509500(-),Os05g0513400(-),Os05g0513500(-),Os05g0513900(-),Os05g0514300(OsTLP10),Os05g0515400(OsARF14),Os05g0515700(OsVOZ2),Os05g0516600(O…
GO:0005575	Cellular Component	GO:0016020	membrane	1962	MSTRG.11068(CALS8),MSTRG.11456(ndhH),MSTRG.13059(--),MSTRG.13600(--),MSTRG.13824(--),MSTRG.1408(atpB),MSTRG.1792(ycf4),MSTRG.1793(petA),MSTRG.18399(ALA2),MSTRG.18661(DGD1),MSTRG.21469(ndhB1),MSTRG.22075(atpB),MSTRG.24928(atpB),MSTRG.25937(HEX6),MSTRG.2641(ABCB11),MSTRG.26646(ndhD),MSTRG.2738(XI-C),MSTRG.30597(COX1),MSTRG.30605(ATPA),MSTRG.32198(atpH),MSTRG.32243(rbcL),MSTRG.3270(ndhB1),MSTRG.4058…
NHX2),Os11g0655000(-),Os11g0660000(OsMHX),Os11g0661300(ER-ANT1),Os11g0670900(-),Os11g0673100(-),Os11g0679700(OsGPAT3),Os11g0704800(OsRhmbd18),Os11g0707600(OsGL1-11),Os11g0707800(OsUCP2),Os12g0100500(-),Os12g0105300(-),Os12g0105500(-),Os12g0105700(-),Os12g0105800(-),Os12g0106600(-),Os12g0115500(OsLTP1.20),Os12g0121300(-),Os12g0130200(-),Os12g0130300(-),Os12g0132200(OsCIPK32),Os12g0132800(OsZIFL10)…
GO:0005575	Cellular Component	GO:0044425	membrane part	1647	MSTRG.11068(CALS8),MSTRG.13600(--),MSTRG.1408(atpB),MSTRG.1792(ycf4),MSTRG.1793(petA),MSTRG.18399(ALA2),MSTRG.21469(ndhB1),MSTRG.22075(atpB),MSTRG.24928(atpB),MSTRG.25937(HEX6),MSTRG.26646(ndhD),MSTRG.2738(XI-C),MSTRG.30597(COX1),MSTRG.30605(ATPA),MSTRG.32198(atpH),MSTRG.32243(rbcL),MSTRG.3270(ndhB1),MSTRG.5087(ndhF),MSTRG.6412(DTX44),MSTRG.9084(ndhG),MSTRG.9106(ndhK),MSTRG.9463(RPS12),MSTRG.9467…
GO:0005575	Cellular Component	GO:0043226	organelle	2198	MSTRG.10063(--),MSTRG.11273(CLPB1),MSTRG.11279(SIT2),MSTRG.11417(--),MSTRG.11456(ndhH),MSTRG.11498(--),MSTRG.11499(--),MSTRG.12636(ATL4),MSTRG.13009(NUA),MSTRG.13074(Os02g0750400),MSTRG.13079(--),MSTRG.13600(--),MSTRG.13824(--),MSTRG.1408(atpB),MSTRG.14760(--),MSTRG.14792(SIT2),MSTRG.15120(--),MSTRG.1533(TY3B-G),MSTRG.15458(--),MSTRG.16096(--),MSTRG.16778(--),MSTRG.17045(--),MSTRG.1721(CAPH),MSTR…
0549100(OsAPx4),Os08g0556900(CP),Os08g0557700(AHP1),Os08g0557800(-),Os08g0559300(SPY),Os08g0561700(OsSOD4),Os08g0562200(OsNTL5),Os08g0562300(-),Os08g0566000(-),Os08g0566600(OsPGR5),Os08g0567200(-),Os09g0101800(-),Os09g0106700(R2R3-MYB),Os09g0109500(-),Os09g0110400(-),Os09g0121000(SMC6),Os09g0121050(-),Os09g0133200(-),Os09g0133600(-),Os09g0134400(-),Os09g0244900(-),Os09g0250700(-),Os09g0261300(-),…
GO:0005575	Cellular Component	GO:0032991	macromolecular complex	699	MSTRG.1408(atpB),MSTRG.1792(ycf4),MSTRG.1828(--),MSTRG.22075(atpB),MSTRG.24743(KIN14M),MSTRG.24928(atpB),MSTRG.26724(rpl2-A),MSTRG.27733(--),MSTRG.27933(rpl22),MSTRG.29151(At1g43190),MSTRG.30599(RPL5),MSTRG.30605(ATPA),MSTRG.32198(atpH),MSTRG.32225(RPL5),MSTRG.32243(rbcL),MSTRG.4058(VPS53),MSTRG.6098(--),MSTRG.9106(ndhK),MSTRG.9463(RPS12),MSTRG.9475(atpH),Os01g0102900(LIR1),Os01g0141700(OsWD40-2)…
GO:0005575	Cellular Component	GO:0019012	virion	1	MSTRG.13009(NUA)
GO:0005575	Cellular Component	GO:0044423	virion part	1	MSTRG.13009(NUA)
GO:0005575	Cellular Component	GO:0031012	extracellular matrix	2	Os02g0740700(OsMMP1),Os10g0557900(-)
GO:0005575	Cellular Component	GO:0099512	supramolecular fiber	22	Os01g0125800(AIP1),Os01g0235900(OsGRL1),Os01g0256400(-),Os01g0805900(OsTUB4),Os01g0816400(-),Os02g0274100(AIM1),Os02g0523300(-),Os02g0719100(-),Os03g0200200(-),Os03g0312600(-),Os03g0381200(-),Os03g0783000(-),Os04g0501700(-),Os04g0538800(-),Os04g0624000(OsATG8b),Os05g0154700(SRS3),Os07g0512200(Atg8),Os08g0191600(OsATG8c),Os09g0267500(OsWD40-168),Os09g0422600(-),Os10g0345701(-),Os10g0494800(OsKTN80…
GO:0005575	Cellular Component	GO:0009295	nucleoid	6	Os01g0895100(-),Os01g0901900(-),Os03g0611700(-),Os03g0785200(-),Os05g0291700(-),Os11g0425300(-)
GO:0005575	Cellular Component	GO:0044421	extracellular region part	21	Os01g0382000(OsPR1b),Os01g0794800(-),Os01g0795000(RSP1),Os01g0940000(CKX4),Os02g0119300(-),Os02g0469600(-),Os03g0351500(SODCC1),Os05g0508300(-),Os06g0144600(-),Os06g0238300(-),Os07g0127600(OsPR1#073),Os07g0127700(PR1b),Os07g0129300(OsPR1),Os08g0318500(Cen8.t01153),Os08g0556900(CP),Os08g0561700(OsSOD4),Os09g0442300(-),Os09g0482720(-),Os10g0191300(OsPR1#101),Os10g0483500(OsCKX3),Os12g0238100(-)
GO:0005575	Cellular Component	GO:0031974	membrane-enclosed lumen	190	MSTRG.32004(NRPD1),Os01g0174900(OsGRX1),Os01g0179400(SSG4),Os01g0184900(BIP104),Os01g0191500(-),Os01g0193900(OsALYL1),Os01g0263500(OsMed3_1),Os01g0266600(OsPrxII),Os01g0338100(-),Os01g0343200(-),Os01g0349400(OsPP5),Os01g0367700(Orysa),Os01g0390300(-),Os01g0390400(-),Os01g0510800(TAF6),Os01g0526200(-),Os01g0530400(OsGRX5),Os01g0547200(-),Os01g0648500(-),Os01g0679000(-),Os01g0680400(-),Os01g0706900…
GO:0005575	Cellular Component	GO:0030054	cell junction	54	MSTRG.11498(--),MSTRG.11499(--),MSTRG.13009(NUA),MSTRG.18399(ALA2),MSTRG.7056(Os05g0567100),Os01g0327100(prx15),Os01g0548750(-),Os01g0587300(-),Os01g0864500(OsSDS1),Os01g0916200(-),Os01g0952200(OsFbox058),Os01g0966000(-),Os02g0105500(-),Os02g0179800(-),Os02g0274100(AIM1),Os02g0823100(OsPIP1),Os03g0121200(prx33),Os03g0124200(OsCrRLK1L6),Os03g0140500(-),Os03g0218400(OsMST4),Os03g0669800(-),Os03g071…
GO:0005575	Cellular Component	GO:0055044	symplast	49	Os01g0327100(prx15),Os01g0548750(-),Os01g0587300(-),Os01g0864500(OsSDS1),Os01g0916200(-),Os01g0952200(OsFbox058),Os01g0966000(-),Os02g0105500(-),Os02g0179800(-),Os02g0274100(AIM1),Os02g0823100(OsPIP1),Os03g0121200(prx33),Os03g0124200(OsCrRLK1L6),Os03g0140500(-),Os03g0218400(OsMST4),Os03g0669800(-),Os03g0715500(OsTVLP1),Os03g0751100(OPT),Os03g0843300(OsLEA7),Os04g0559700(OsPIP1),Os04g0619600(OsRLC…
GO:0005575	Cellular Component	GO:0005576	extracellular region	94	Os01g0179400(SSG4),Os01g0270100(-),Os01g0296200(OsPGL13),Os01g0327100(prx15),Os01g0382000(OsPR1b),Os01g0624000(-),Os01g0788400(OsPME6),Os01g0794800(-),Os01g0795000(RSP1),Os01g0803200(Oc1*),Os01g0850550(OsLAC7),Os01g0892600(-),Os01g0897200(OsRNS2),Os01g0940000(CKX4),Os01g0974500(-),Os02g0119300(-),Os02g0469600(-),Os02g0534400(OSCIN1),Os02g0696500(OsXTH23),Os02g0753800(ANN2),Os02g0797500(AST),Os03g…

## Sheet: KEGG enrichment
KEGG enrichment of module turquoise genes
KEGG_A_class	KEGG_B_class	Pathway	turquoise (1538)	All (5840)	Pvalue	Qvalue	Pathway ID	Genes	K_IDs
Cellular Processes	Transport and catabolism	Autophagy - other eukaryotes	28	43	9.98257e-08	7.42916e-06	ko04136	Os03g0746600(OsWD40-91);Os03g0122000(-);Os04g0624000(OsATG8b);Os11g0162000(-);Os12g0446700(-);Os05g0180600(-);Os07g0512200(Atg8);Os08g0191600(OsATG8c);Os01g0200000(OsATG3a);Os02g0217600(OsPP2A-3);Os03g0644000(ATG6B);Os03g0268200(OsATG1a);Os02g0179800(-);Os02g0644500(OsATG13a);Os08g0307400(-);Os01g0614900(OsATG7);Os03g0681700(OsWD40-81);Os02g0791800(OsATG18a);Os11g0100100(OsATG8e);Os04g0497350(OsA…	K17890+K08269+K08341+K08331+K19730+K00914+K08341+K08341+K08343+K04382+K08334+K08269+K08330+K08331+K00914+K08337+K08266+K17908+K08341+K17888+K07204+K07204+K17907+K04382+K08334+K07203+K17907+K08342
Metabolism	Lipid metabolism	Glycerolipid metabolism	49	95	1.11717e-07	7.42916e-06	ko00561	Os03g0425300(-);Os05g0387200(-);Os10g0492900(-);Os07g0100300(SQD2.1);Os05g0280500(GPAT);Os03g0265100(PLS2);Os01g0682500(-);Os12g0100500(-);Os11g0158400(-);Os01g0762000(OspPLAIValpha);Os04g0647800(-);Os02g0114400(GPAT);Os04g0634700(OsBIDK1);Os03g0719400(-);Os06g0563900(-);Os09g0423600(-);Os01g0847800(AKR3);Os02g0730000(OsALDH2a);Os01g0783200(-);Os08g0178700(-);Os02g0539100(-);Os05g0363100(-);Os11g…	K00901+K06118+K07407+K06119+K13508+K06119+K15918+K01054+K09480+K14674+K00864+K13508+K00901+K01054+K11155+K03715+K00002+K00128+K00901+K00901+K09480+K01054+K13508+K09480+K00901+K14674+K15728+K00128+K22848+K01054+K14085+K15728+K00128+K01054+K03715+K11155+K09480+K13523+K15728+K01054+K18693+K18693+K13513+K07407+K00128+K13506+K07407+K00655+K09480
Metabolism	Energy metabolism	Oxidative phosphorylation	74	180	8.49069e-06	0.000376421	ko00190	Os03g0718600(-);Os02g0816800(OsNDUFA9);Os03g0295500(-);Os05g0533700(-);Os01g0659200(v-ATP-E);Os01g0974800(-);Os02g0520800(-);Os06g0662000(PLS1);Os02g0550100(-);Os03g0251500(-);Os03g0772800(-);Os02g0175400(VHA-A2);Os10g0320400(-);Os01g0222500(-);Os10g0355800(ATPB);Os01g0711000(-);Os06g0568200(OsVHA-B);Os11g0169900(-);Os03g0713400(-);Os12g0168900(-);Os07g0134800(SDH1);Os02g0794600(-);Os04g0398500(-…	K02258+K03953+K03952+K03940+K02150+K01507+K00411+K02145+K02155+K02154+K02266+K02145+K02136+K02150+K02112+K02147+K02147+K02155+K03934+K02155+K00234+K02260+K00411+K02257+K02154+K00417+K03661+K02154+K02137+K00413+K02133+K02146+K00236+K02151+K02260+K02152+K01507+K02135+K02148+K02265+K02151+K05575+K05576+K05578+K02108+K05577+K05572+K02110+K03884+K02128+K02261+K02132+K03936+K02126+K03880+K03881+K02262+…
Metabolism	Global and overview maps	Metabolic pathways	795	2747	1.18274e-05	0.00039326	ko01100	Os10g0525500(OsGSTU21);Os07g0677100(POX8.1);Os11g0588300(OsGSTT1);Os08g0342400(-);Os07g0613000(-);Os07g0687900(wsi76);Os08g0206600(-);Os06g0726400(SBE1);Os07g0627000(DPE1);Os02g0708200(-);Os04g0486950(-);Os02g0627100(OsPAL1);Os03g0718600(-);Os03g0181500(ONI1);Os02g0805500(-);Os01g0654500(-);Os03g0328400(-);Os07g0676900(prx109);Os02g0816800(OsNDUFA9);Os03g0425300(-);Os04g0429800(OsNaPRT2);Os02g055…	K00799+K00430+K00799+K12524+K00951+K18819+K00602+K00700+K00705+K00876+K01638+K10775+K02258+K15397+K01082+K00031+K14641+K00430+K03953+K00901+K00763+K05894+K00083+K00951+K00766+K00020+K01510+K06118+K16871+K00921+K17872+K02293+K00083+K03952+K00106+K15919+K00051+K01725+K00249+K03847+K00606+K10532+K08679+K00939+K03940+K01814+K13065+K01723+K01193+K00949+K22913+K07407+K00058+K00799+K05546+K14190+K01228+…
Cellular Processes	Transport and catabolism	Peroxisome	46	102	2.90768e-05	0.000773442	ko04146	Os01g0654500(-);Os03g0429800(-);Os09g0133200(-);Os04g0614000(-);Os03g0786100(OsGLO1);Os10g0329300(-);Os08g0502700(-);Os03g0351500(SODCC1);Os03g0829100(-);Os10g0467200(-);Os07g0152900(GLO4);Os02g0817700(OsI57);Os05g0323900(SODA1);Os06g0727200(CATB);Os03g0708100(OMT7);Os07g0665200(Cu/Zn-SOD);Os02g0661000(-);Os01g0505400(-);Os01g0269000(-);Os05g0317200(LACS8);Os01g0681200(-);Os08g0500100(OsPEX5);Os0…	K00031+K00106+K11147+K13237+K11517+K00869+K00830+K04565+K08726+K13345+K11517+K07513+K04564+K03781+K00477+K04565+K13337+K12261+K01640+K01897+K01897+K13342+K00031+K12663+K13335+K01578+K11517+K13346+K00232+K13343+K13339+K13336+K13348+K01897+K01897+K00232+K03781+K04565+K13348+K00232+K13356+K17879+K06664+K11517+K00232+K13354
Cellular Processes	Transport and catabolism	Phagosome	42	93	6.15606e-05	0.00136459	ko04145	Os10g0441800(OsRab5A2);Os08g0450800(-);Os03g0791500(-);Os01g0659200(v-ATP-E);Os08g0450700(-);Os06g0662000(PLS1);Os02g0550100(-);Os03g0251500(-);Os01g0254900(-);Os02g0178400(-);Os02g0175400(VHA-A2);Os01g0227300(OsRab7B1);Os01g0222500(-);Os05g0516600(OsRab7B3);Os05g0180600(-);Os01g0711000(-);Os06g0568200(OsVHA-B);Os12g0631100(GLUP4);Os01g0714900(OsRab7A2);Os11g0169900(-);Os06g0259000(-);Os03g066650…	K07889+K00921+K08517+K02150+K00921+K02145+K02155+K02154+K08488+K07342+K02145+K07897+K02150+K07897+K00914+K02147+K02147+K07889+K07897+K02155+K00921+K07889+K02155+K00921+K10956+K07897+K02154+K03661+K02154+K04392+K00921+K02146+K00914+K07375+K08492+K02151+K02152+K00921+K02148+K04392+K02151+K00921
Metabolism	Energy metabolism	Photosynthesis	41	91	8.01998e-05	0.0015238	ko00195	Os04g0473150(-);Os01g0773700(PSBW);Os07g0147500(PsbR);Os07g0141400(PsbP);Os07g0435300(PsaE);Os09g0481200(PsaG);Os10g0461100(-);Os10g0355800(ATPB);Os03g0659266(-);Os08g0560900(PsaD);Os03g0784700(FNR);Os05g0443500(Fd);Os01g0860601(-);Os06g0101600(OsPC);Os07g0544800(-);Os03g0659233(-);Os04g0414700(-);Os12g0420400(PsaL);Os03g0835900(OsFd3);Os12g0189400(PsaN);Os07g0148900(PsaK);Os07g0147550(OsPsbR2);O…	K02703+K02721+K03541+K02717+K02693+K08905+K02717+K02112+K02708+K02692+K02641+K02639+K02639+K02638+K08901+K02707+K14332+K02699+K02639+K02701+K02698+K03541+K02723+K02641+K02717+K02717+K02640+K02691+K02108+K02707+K02690+K02704+K02712+K02110+K02634+K02708+K02112+K02634+K02112+K02112+K02110
Metabolism	Amino acid metabolism	Tyrosine metabolism	26	51	0.000140529	0.0023363	ko00350	Os02g0302700(OsNAAT2);Os11g0210300(ADH1);Os11g0245100(OsGSTZ4);Os01g0760600(-);Os06g0345200(OsNAAT4);Os02g0196800(-);Os02g0236000(-);Os06g0338200(OsDAO1);Os06g0548000(-);Os06g0699500(-);Os11g0644800(-);Os02g0797500(AST);Os06g0103300(-);Os01g0871300(-);Os08g0140300(TDC1);Os02g0302200(-);Os11g0210600(Adh3);Os07g0437500(TDC2);Os10g0159800(-);Os02g0709200(-);Os02g0168100(OsHPPD);Os02g0637700(-);Os03g…	K00815+K18857+K01800+K14454+K00815+K01555+K14455+K00276+K14455+K07253+K00815+K00811+K00451+K15849+K01593+K00815+K00001+K01593+K00001+K00817+K00457+K00001+K00121+K01593+K01557+K01800
Metabolism	Global and overview maps	Carbon metabolism	107	307	0.000434378	0.00603265	ko01200	Os04g0486950(-);Os01g0654500(-);Os01g0228600(OsHPR2-1);Os08g0562100(-);Os08g0447000(-);Os02g0595500(OsIDHc);Os11g0629500(-);Os03g0754200(-);Os08g0547100(-);Os03g0786100(OsGLO1);Os06g0486800(OsFDH);Os08g0502700(-);Os12g0625000(rcs1);Os03g0266200(OsEno3);Os07g0529000(OsEnS-107);Os01g0760600(-);Os02g0105200(-);Os06g0617800(-);Os01g0110400(-);Os10g0405600(OsPFK10);Os01g0682500(-);Os06g0608700(OsAld-Y…	K01638+K00031+K15919+K00051+K00058+K00030+K01079+K01803+K01057+K11517+K00122+K00830+K01738+K01689+K01637+K14454+K00627+K00948+K00626+K00850+K15918+K01623+K01601+K14455+K01623+K00026+K00036+K14455+K11517+K00948+K03841+K00600+K00025+K01738+K00028+K00036+K01810+K03781+K00261+K01006+K00873+K00033+K13034+K00850+K00850+K01913+K00627+K01810+K00029+K00026+K19269+K00140+K01057+K00234+K00031+K01455+K14272+…
Metabolism	Lipid metabolism	Fatty acid degradation	26	54	0.000453583	0.00603265	ko00071	Os07g0675000(-);Os05g0529200(-);Os01g0348600(-);Os11g0210300(ADH1);Os03g0310400(-);Os01g0110400(-);Os02g0817700(OsI57);Os02g0274100(AIM1);Os02g0730000(OsALDH2a);Os05g0317200(LACS8);Os01g0681200(-);Os11g0210600(Adh3);Os10g0159800(-);Os11g0605500(ACX2);Os11g0147000(-);Os01g0655800(-);Os06g0270900(OsALDH2B1);Os09g0440300(ALDH7);Os11g0186200(OsALDH3H2);Os05g0163700(OsACX4);Os02g0637700(-);Os03g018960…	K00249+K07517+K10527+K18857+K01692+K00626+K07513+K10527+K00128+K01897+K01897+K00001+K00001+K00232+K01897+K01897+K00128+K14085+K00128+K00232+K00001+K00121+K07517+K00232+K00128+K00232
Metabolism	Metabolism of other amino acids	beta-Alanine metabolism	24	49	0.000543554	0.00657206	ko00410	Os08g0465800(OsGAD1);Os02g0736400(OsDHODH1);Os03g0310400(-);Os06g0338200(OsDAO1);Os04g0623300(PAO3);Os07g0485100(-);Os02g0730000(OsALDH2a);Os07g0188800(OsALDH6B2);Os01g0807900(-);Os09g0394100(-);Os11g0605500(ACX2);Os12g0264500(-);Os06g0677400(-);Os06g0270900(OsALDH2B1);Os09g0440300(ALDH7);Os11g0186200(OsALDH3H2);Os01g0710200(PAO1);Os05g0163700(OsACX4);Os06g0354500(ACX3);Os04g0671200(PAO4);Os03g02…	K01580+K00207+K01692+K00276+K17839+K01431+K00128+K00140+K01464+K01578+K00232+K05605+K23146+K00128+K14085+K00128+K12259+K00232+K00232+K17839+K01580+K00128+K00232+K05605
Metabolism	Lipid metabolism	Glycerophospholipid metabolism	50	128	0.000991765	0.0109921	ko00564	Os03g0425300(-);Os05g0358700(OsPLDzeta1);Os02g0119800(-);Os03g0826600(NPC1);Os05g0280500(GPAT);Os12g0121300(-);Os02g0514500(-);Os10g0327300(-);Os01g0762000(OspPLAIValpha);Os02g0114400(GPAT);Os04g0634700(OsBIDK1);Os09g0513100(-);Os01g0183000(-);Os08g0224800(-);Os01g0783200(-);Os08g0178700(-);Os05g0495700(GPDH1);Os10g0387000(-);Os01g0801600(-);Os02g0173500(-);Os01g0175000(-);Os01g0763600(-);Os10g05…	K00901+K01115+K00993+K01114+K13508+K00967+K18696+K00981+K14674+K13508+K00901+K22389+K14156+K00967+K00901+K00901+K00006+K00967+K00006+K00968+K06130+K01126+K00968+K13508+K01115+K01115+K13510+K01115+K00901+K06129+K06124+K00967+K14674+K22389+K15728+K01114+K15728+K00995+K13523+K15728+K00981+K01126+K18693+K18693+K01126+K13513+K01517+K13506+K00111+K00655
Metabolism	Metabolism of other amino acids	Phosphonate and phosphinate metabolism	7	9	0.00186074	0.0190368	ko00440	Os02g0119800(-);Os12g0121300(-);Os08g0224800(-);Os10g0387000(-);Os02g0173500(-);Os10g0578900(-);Os11g0123400(-)	K00993+K00967+K00967+K00967+K00968+K00968+K00967
Metabolism	Carbohydrate metabolism	Propanoate metabolism	17	34	0.00261446	0.0248374	ko00640	Os10g0363300(ACC1);Os03g0310400(-);Os01g0110400(-);Os07g0170100(-);Os12g0183100(-);Os07g0188800(OsALDH6B2);Os09g0394100(-);Os11g0605500(ACX2);Os02g0525900(-);Os12g0264500(-);Os06g0677400(-);Os01g0314100(-);Os05g0163700(OsACX4);Os06g0354500(ACX3);Os04g0404800(-);Os06g0347100(-);Os06g0594100(OsCRO)	K11262+K01692+K00626+K00167+K00166+K00140+K01578+K00232+K01895+K05605+K23146+K09699+K00232+K00232+K01895+K00232+K05605
Metabolism	Amino acid metabolism	Phenylalanine, tyrosine and tryptophan biosynthesis	23	54	0.00675463	0.0598911	ko00400	Os03g0126000(-);Os02g0302700(OsNAAT2);Os02g0266000(-);Os06g0709000(-);Os01g0760600(-);Os06g0345200(OsNAAT4);Os09g0565700(EIP3);Os02g0236000(-);Os06g0548000(-);Os06g0632200(TS);Os11g0644800(-);Os02g0797500(AST);Os01g0871300(-);Os02g0302200(-);Os01g0764400(CM);Os03g0826500(OASA1);Os07g0182100(OsTSA);Os03g0718000(OASB2);Os02g0709200(-);Os01g0375200(DHQDT/SDH);Os04g0467700(-);Os08g0135900(TS);Os02g07…	K00766+K00815+K01817+K15227+K14454+K00815+K05359+K14455+K14455+K06001+K00815+K00811+K15849+K00815+K01850+K01657+K01695+K01658+K00817+K13832+K01609+K01696+K00891
Metabolism	Glycan biosynthesis and metabolism	N-Glycan biosynthesis	19	43	0.00837929	0.0614407	ko00510	Os04g0576800(-);Os04g0544900(-);Os03g0216600(-);Os01g0921200(OsMOGS);Os02g0832800(GlcNAc-TI);Os12g0611900(-);Os03g0824400(-);Os02g0595100(-);Os02g0688500(-);Os04g0477500(OsSTA124);Os05g0519900(-);Os02g0147200(-);Os03g0288700(-);Os02g0798100(-);Os06g0245700(-);Os05g0209100(-);Os04g0606400(-);Os02g0146500(-);Os02g0594900(-)	K12345+K03847+K05546+K01228+K00726+K00737+K00721+K00737+K03849+K00737+K07151+K00902+K07252+K00736+K01231+K23741+K01230+K00902+K00737
Metabolism	Amino acid metabolism	Arginine and proline metabolism	28	70	0.00838651	0.0614407	ko00330	Os02g0611200(SAMDC2);Os05g0536400(-);Os01g0760600(-);Os04g0346000(-);Os02g0236000(-);Os06g0548000(-);Os04g0466600(OsAIH);Os02g0827100(-);Os10g0550900(OsProDH);Os04g0623300(PAO3);Os02g0797500(AST);Os02g0730000(OsALDH2a);Os04g0106300(OsARG);Os04g0118100(OsAMI1);Os01g0848200(P5CS2);Os05g0513900(-);Os06g0528600(OSSPDS2);Os06g0270900(OsALDH2B1);Os09g0440300(ALDH7);Os11g0186200(OsALDH3H2);Os04g0498600(…	K01611+K00294+K14454+K00472+K14455+K14455+K10536+K00472+K00318+K17839+K00811+K00128+K01476+K01426+K12657+K01259+K00797+K00128+K14085+K00128+K01611+K12259+K12251+K17839+K13427+K00128+K00819+K12657
Metabolism	Nucleotide metabolism	Pyrimidine metabolism	27	67	0.00851413	0.0614407	ko00240	Os02g0708200(-);Os03g0328400(-);Os03g0378000(-);Os02g0736400(OsDHODH1);Os11g0484400(-);Os07g0204500(-);Os09g0567900(-);Os07g0213500(-);Os11g0265000(-);Os01g0951400(UMPS2);Os01g0654100(-);Os04g0346800(-);Os01g0935600(-);Os08g0504400(-);Os07g0485100(-);Os01g0709400(-);Os12g0123500(-);Os01g0807900(-);Os08g0436100(-);Os05g0455700(-);Os07g0492000(OsNDPK1);Os01g0712700(-);Os05g0573300(-);Os08g0557900(-…	K00876+K14641+K01510+K00207+K13998+K03787+K01240+K01520+K00876+K13421+K01937+K16904+K00943+K16329+K01431+K03787+K14641+K01464+K01510+K00761+K00940+K01489+K01937+K01240+K09903+K00876+K01489
Metabolism	Amino acid metabolism	Phenylalanine metabolism	23	55	0.00877724	0.0614407	ko00360	Os02g0627100(OsPAL1);Os02g0302700(OsNAAT2);Os03g0310400(-);Os02g0626400(OsPAL);Os01g0760600(-);Os06g0345200(OsNAAT4);Os02g0236000(-);Os06g0338200(OsDAO1);Os06g0548000(-);Os06g0699500(-);Os11g0644800(-);Os02g0797500(AST);Os04g0518100(OsPAL02);Os01g0871300(-);Os08g0140300(TDC1);Os02g0302200(-);Os04g0118100(OsAMI1);Os02g0626600(OsPAL05);Os07g0437500(TDC2);Os02g0709200(-);Os02g0168100(OsHPPD);Os01g07…	K10775+K00815+K01692+K10775+K14454+K00815+K14455+K00276+K14455+K07253+K00815+K00811+K13064+K15849+K01593+K00815+K01426+K10775+K01593+K00817+K00457+K00074+K01593
Metabolism	Lipid metabolism	Sphingolipid metabolism	16	35	0.0102836	0.0683859	ko00600	Os10g0492900(-);Os05g0539400(OsBgal9);Os03g0264000(-);Os11g0516000(OsLCB2a3);Os02g0581300(-);Os01g0624000(-);Os02g0745700(-);Os07g0444000(-);Os01g0100900(SPL1);Os01g0952600(-);Os07g0627700(OsGL1-9);Os10g0493600(alphaGa1);Os02g0656200(OsCERK);Os03g0698900(-);Os07g0679300(alpha-Gal);MSTRG.7056(Os05g0567100)	K07407+K12309+K23727+K00654+K23727+K12349+K04713+K17108+K01634+K01190+K04713+K07407+K04715+K04711+K07407+K04718
Genetic Information Processing	Folding, sorting and degradation	Ubiquitin mediated proteolysis	54	158	0.0164373	0.10043	ko04120	Os09g0252800(-);Os05g0232500(OsUBC43);Os05g0104900(OsPUB66);Os05g0463900(-);Os08g0374100(OsUBC5);Os01g0925800(OsUBC44);Os05g0425700(OsFbox258);Os01g0104600(OsDET1);Os02g0746000(CUL3A);Os01g0819500(OsUBC22);Os01g0271500(-);Os02g0708300(OsRBX1a);Os10g0536000(OsSce1);Os05g0149600(OsCUL1-2);Os05g0159000(-);Os05g0460200(OsUBC12);Os08g0170900(OsCUL3c);Os01g0141700(OsWD40-2);Os05g0182500(OsUBC8);Os05g05…	K10592+K10581+K09561+K10590+K10579+K04649+K03875+K10571+K03869+K06689+K10686+K03868+K10577+K03347+K10589+K10575+K03869+K10140+K10573+K10581+K10581+K10579+K10144+K03869+K10610+K10592+K06689+K10143+K06689+K04506+K10144+K10591+K04554+K03094+K10581+K03354+K10575+K10604+K10597+K10590+K03347+K10580+K10588+K03178+K10578+K03178+K10588+K10688+K04706+K04506+K06689+K10576+K06689+K10601
Cellular Processes	Transport and catabolism	Endocytosis	58	172	0.0176924	0.10043	ko04144	Os10g0441800(OsRab5A2);Os02g0437800(-);Os01g0338200(-);Os11g0557900(-);Os03g0572300(-);Os02g0235000(-);Os03g0186800(-);Os03g0843100(OsRab11A1);Os05g0358700(OsPLDzeta1);Os10g0169800(-);Os01g0862300(-);Os01g0738600(-);Os09g0327100(OsRab11C2);Os06g0136700(-);Os01g0227300(OsRab7B1);Os01g0141100(OsSKD1);Os07g0414800(-);Os03g0108400(-);Os05g0516600(OsRab7B3);Os03g0666100(OsGNOM1);Os06g0687800(-);Os02g0…	K07889+K12479+K11866+K05754+K12185+K05756+K12185+K07904+K01115+K19367+K17917+K12471+K07904+K18465+K07897+K12196+K10364+K12193+K07897+K18443+K12483+K18442+K05755+K07889+K18466+K12471+K12190+K07897+K12189+K03283+K07901+K07901+K12486+K19476+K00889+K07889+K18468+K07904+K07897+K12493+K01115+K18464+K01115+K10591+K10365+K01115+K12194+K12198+K19476+K12486+K11866+K19476+K12194+K11826+K03283+K05757+K12200+…
Metabolism	Metabolism of other amino acids	Glutathione metabolism	46	132	0.017846	0.10043	ko00480	Os10g0525500(OsGSTU21);Os11g0588300(OsGSTT1);Os01g0654500(-);Os03g0283100(OsGSTL2);Os01g0949700(OsGSTU7);Os02g0813500(OsGR2);Os10g0529500(OsGSTU30);Os04g0485300(OsG6PDH2);Os10g0528300(OsGSTU4);Os03g0318500(OsG6PDH5);Os01g0966000(-);Os11g0484500(Os6PGDH2);Os01g0369700(OsGSTF5);Os02g0794700(-);Os08g0562700(-);Os02g0465900(OsARP);Os01g0371200(OsGSTF1);Os03g0358100(OsGpx2);Os10g0529400(OsGSTU9);Os10g…	K00799+K00799+K00031+K00799+K00799+K00383+K00799+K00036+K00799+K00036+K01469+K00033+K00799+K01255+K01256+K22596+K00799+K00432+K00799+K00799+K00031+K01255+K00432+K21456+K00036+K00799+K00799+K00799+K00434+K00799+K00797+K00799+K00799+K00799+K00434+K00799+K00799+K00432+K00799+K00434+K00799+K01919+K00036+K00799+K00799+K00799
Metabolism	Amino acid metabolism	Valine, leucine and isoleucine degradation	21	52	0.0185729	0.10043	ko00280	Os05g0565500(-);Os07g0675000(-);Os03g0310400(-);Os12g0605800(OsL55);Os01g0110400(-);Os02g0817700(OsI57);Os07g0170100(-);Os02g0730000(OsALDH2a);Os12g0183100(-);Os07g0188800(OsALDH6B2);Os01g0269000(-);Os08g0544900(-);Os12g0264500(-);Os06g0677400(-);Os06g0270900(OsALDH2B1);Os09g0440300(ALDH7);Os01g0314100(-);Os11g0186200(OsALDH3H2);Os02g0646500(OS-ALDH);Os03g0231600(-);Os06g0594100(OsCRO)	K00020+K00249+K01692+K01968+K00626+K07513+K00167+K00128+K00166+K00140+K01640+K01641+K05605+K23146+K00128+K14085+K09699+K00128+K00128+K00826+K05605
Metabolism	Amino acid metabolism	Arginine biosynthesis	16	37	0.0188779	0.10043	ko00220	Os01g0760600(-);Os02g0236000(-);Os06g0210200(-);Os06g0548000(-);Os04g0543900(OsGDH2);Os02g0797500(AST);Os02g0690800(-);Os04g0106300(OsARG);Os07g0108300(ALT-2);Os01g0558200(-);Os08g0511900(-);Os05g0129100(-);Os10g0390500(ALAAT);Os02g0104700(NOA1);Os02g0650900(OsGDH3);Os07g0461900(-)	K14454+K14455+K14677+K14455+K00261+K00811+K01438+K01476+K14272+K00262+K14677+K00818+K00814+K13427+K00261+K00818
Metabolism	Biosynthesis of other secondary metabolites	Isoquinoline alkaloid biosynthesis	13	29	0.0238856	0.121184	ko00950	Os02g0302700(OsNAAT2);Os01g0760600(-);Os06g0345200(OsNAAT4);Os02g0236000(-);Os06g0338200(OsDAO1);Os06g0548000(-);Os11g0644800(-);Os02g0797500(AST);Os01g0871300(-);Os08g0140300(TDC1);Os02g0302200(-);Os07g0437500(TDC2);Os08g0140500(OsTDC3)	K00815+K14454+K00815+K14455+K00276+K14455+K00815+K00811+K15849+K01593+K00815+K01593+K01593
Environmental Information Processing	Signal transduction	Phosphatidylinositol signaling system	31	85	0.0246694	0.121184	ko04070	Os03g0425300(-);Os08g0450800(-);Os08g0450700(-);Os03g0310800(-);Os03g0290500(-);Os12g0562400(OsPLC3);Os03g0743500(OsCML4);Os10g0327300(-);Os08g0556700(-);Os04g0634700(OsBIDK1);Os05g0491100(CALa*);Os05g0180600(-);Os06g0259000(-);Os02g0822500(-);Os02g0554300(-);Os01g0783200(-);Os08g0178700(-);Os09g0402300(-);Os03g0689100(-);Os07g0694000(OsPI-PLC1);Os12g0236700(-);Os12g0576900(-);Os08g0307400(-);Os1…	K00901+K00921+K00921+K02183+K21797+K05857+K02183+K00981+K18081+K00901+K02183+K00914+K00921+K00889+K21797+K00901+K00901+K00921+K13024+K05857+K00921+K00901+K00914+K01110+K00921+K00981+K02183+K00913+K02183+K00921+K02183
Metabolism	Carbohydrate metabolism	Pyruvate metabolism	34	95	0.0257147	0.121184	ko00620	Os04g0486950(-);Os08g0562100(-);Os10g0363300(ACC1);Os02g0105200(-);Os01g0110400(-);Os08g0434300(MDH);Os10g0478200(OscMDH);Os10g0503500(-);Os08g0191700(GLYI-11);Os05g0405000(flo4);Os01g0276700(-);Os03g0305000(-);Os02g0730000(OsALDH2a);Os06g0499900(-);Os01g0188400(NADP-ME);Os01g0829800(-);Os03g0332400(GLYII-2);Os09g0509200(-);Os06g0105400(-);Os03g0773800(-);Os02g0525900(-);Os11g0216000(-);Os12g0632…	K01638+K00051+K11262+K00627+K00626+K00026+K00025+K00028+K01759+K01006+K00873+K01913+K00128+K00627+K00029+K00026+K01069+K00162+K00627+K00026+K01895+K00873+K00026+K00128+K14085+K00128+K00029+K01679+K00627+K01759+K00873+K00128+K01895+K00051
Metabolism	Carbohydrate metabolism	Glyoxylate and dicarboxylate metabolism	33	92	0.0268092	0.121184	ko00630	Os04g0486950(-);Os01g0228600(OsHPR2-1);Os03g0786100(OsGLO1);Os06g0486800(OsFDH);Os08g0502700(-);Os07g0529000(OsEnS-107);Os01g0110400(-);Os01g0682500(-);Os05g0427800(-);Os08g0434300(MDH);Os07g0152900(GLO4);Os05g0429000(OsSHM5);Os10g0478200(OscMDH);Os06g0727200(CATB);Os03g0305000(-);Os01g0829800(-);Os09g0261300(-);Os01g0764900(-);Os07g0108300(ALT-2);Os02g0194100(-);Os07g0616500(GLO5);Os03g0773800(-…	K01638+K15919+K11517+K00122+K00830+K01637+K00626+K15918+K01601+K00026+K11517+K00600+K00025+K03781+K01913+K00026+K19269+K01455+K14272+K01647+K11517+K00026+K01895+K15893+K00026+K03781+K15919+K15919+K01647+K00605+K01895+K11517+K01601
Metabolism	Metabolism of terpenoids and polyketides	Terpenoid backbone biosynthesis	23	60	0.0273347	0.121184	ko00900	Os01g0764600(-);Os05g0413400(-);Os05g0543400(OsFPPS2);Os10g0329300(-);Os01g0802100(OsIspE);Os02g0603800(OsHDS);Os02g0680400(-);Os01g0110400(-);Os03g0184550(-);Os11g0105800(-);Os02g0680600(OsIspF);Os04g0602900(-);Os12g0105500(-);Os07g0607700(-);Os09g0514400(-);Os07g0580900(OsGGPPS1);Os04g0692800(-);Os08g0544900(-);Os01g0832000(CDS5);Os09g0492700(HMGR);Os07g0190000(OsDXS);Os06g0708100(-);Os06g06782…	K06981+K01823+K00787+K00869+K00919+K03526+K06013+K00626+K15891+K15892+K01770+K00587+K15892+K11778+K05955+K13789+K05906+K01641+K15892+K00021+K01662+K15889+K14066
Metabolism	Carbohydrate metabolism	Inositol phosphate metabolism	28	77	0.0329234	0.13824	ko00562	Os08g0450800(-);Os08g0109100(-);Os03g0754200(-);Os08g0450700(-);Os03g0826600(NPC1);Os03g0290500(-);Os12g0562400(OsPLC3);Os08g0556700(-);Os03g0182400(-);Os10g0428200(-);Os05g0180600(-);Os03g0818100(-);Os06g0259000(-);Os02g0822500(-);Os02g0554300(-);Os07g0188800(OsALDH6B2);Os09g0402300(-);Os06g0195600(-);Os07g0694000(OsPI-PLC1);Os12g0236700(-);Os08g0307400(-);Os12g0407500(OsPP130);Os03g0852800(OsNP…	K00921+K22913+K01803+K00921+K01114+K21797+K05857+K18081+K22913+K22913+K00914+K03103+K00921+K00889+K21797+K00140+K00921+K22913+K05857+K00921+K00914+K01110+K01114+K00921+K01765+K01858+K00913+K00921
Metabolism	Carbohydrate metabolism	Citrate cycle (TCA cycle)	23	61	0.0332608	0.13824	ko00020	Os01g0654500(-);Os02g0595500(OsIDHc);Os02g0105200(-);Os11g0696200(-);Os08g0434300(MDH);Os10g0478200(OscMDH);Os06g0499900(-);Os01g0829800(-);Os07g0134800(SDH1);Os01g0300200(-);Os04g0508200(-);Os09g0509200(-);Os02g0194100(-);Os06g0105400(-);Os03g0773800(-);Os01g0276100(OsIDHa);Os12g0632700(-);Os04g0479200(-);Os02g0121800(-);Os03g0337900(-);Os09g0408600(-);Os02g0232400(-);Os04g0394200(-)	K00031+K00030+K00627+K01648+K00026+K00025+K00627+K00026+K00234+K01648+K00031+K00162+K01647+K00627+K00026+K00030+K00026+K00030+K00236+K01679+K00627+K01647+K00658
Metabolism	Carbohydrate metabolism	Pentose phosphate pathway	23	62	0.0400999	0.161615	ko00030	Os08g0345700(OsPFPA3);Os08g0547100(-);Os06g0617800(-);Os10g0405600(OsPFK10);Os06g0608700(OsAld-Y);Os01g0118000(-);Os04g0485300(OsG6PDH2);Os03g0100040(-);Os01g0866400(FR);Os03g0318500(OsG6PDH5);Os06g0256500(Pgi2(Pgib));Os11g0484500(Os6PGDH2);Os06g0151900(OsPFK06);Os09g0415800(OsPFK08);Os08g0478800(-);Os09g0529100(-);Os01g0926300(-);Os04g0266900(-);Os02g0600400(OsG6PDH1);Os03g0776000(Pgi1(Pgia));Os…	K00895+K01057+K00948+K00850+K01623+K01623+K00036+K00948+K03841+K00036+K01810+K00033+K00850+K00850+K01810+K01057+K00616+K00615+K00036+K01810+K01807+K00850+K00036
Genetic Information Processing	Folding, sorting and degradation	SNARE interactions in vesicular transport	17	44	0.0495459	0.18973	ko04130	Os03g0791500(-);Os08g0277900(-);Os02g0820700(-);Os06g0168500(-);Os09g0416700(-);Os12g0639800(-);Os01g0254900(-);Os01g0964000(-);Os06g0174400(OsVAMP7111);Os07g0164300(-);Os04g0530400(-);Os07g0577900(-);Os10g0154000(OsVAMP714);Os02g0119400(-);Os03g0803000(-);Os02g0658900(-);Os08g0440000(-)	K08517+K08503+K08504+K08486+K08495+K08515+K08488+K08516+K08515+K08486+K08492+K08505+K08515+K08501+K08515+K08497+K08495
Genetic Information Processing	Transcription	Basal transcription factors	22	60	0.0499289	0.18973	ko03022	Os01g0970500(OsTFIIAgamma1);Os11g0473100(MAT1);Os07g0205200(-);Os05g0347000(-);Os01g0772200(OsTFIIF2-2);Os01g0510800(TAF6);Os01g0680400(-);Os05g0144800(OsXPD);Os12g0574800(-);Os09g0431500(-);Os01g0648500(-);Os10g0397200(-);Os02g0125800(-);Os09g0534800(OsTFIIB);Os06g0645700(OsHAF701);Os08g0338200(-);Os03g0196900(-);Os03g0441000(-);Os08g0343300(-);Os01g0338100(-);Os09g0410125(-);Os06g0645901(-)	K03123+K10842+K03130+K03132+K03139+K03131+K03135+K10844+K14649+K03134+K03132+K03137+K03143+K03124+K03125+K03141+K03124+K03129+K03136+K03127+K03128+K03125
Metabolism	Metabolism of terpenoids and polyketides	Carotenoid biosynthesis	15	38	0.0524808	0.193887	ko00906	Os03g0184000(PDS1);Os10g0546600(CYP97C2);Os06g0729000(PSY1);Os09g0457100(OsABA8OX3);Os09g0555500(OsPSY);Os07g0154100(OSNCED3);Os04g0578400(OsBCH2);Os07g0204900(-);Os07g0282300(OsAAO3);Os03g0810800(OsABA2);Os12g0617400(OsNCED2);Os04g0448900(OsABA1);Os03g0645900(OsNCED1);Os01g0566500(OsCCD8a);Os04g0448950(-)	K02293+K09837+K02291+K09843+K02291+K09840+K15746+K00514+K09842+K09841+K09840+K09838+K09840+K17913+K09838
Metabolism	Metabolism of cofactors and vitamins	Nicotinate and nicotinamide metabolism	10	23	0.0560648	0.199287	ko00760	Os04g0429800(OsNaPRT2);Os07g0204500(-);Os09g0567900(-);Os01g0709400(-);Os02g0134400(OsLASPO);Os04g0271000(osSRT701);Os04g0436400(-);Os03g0837300(OsNaPRT1);Os01g0957000(-);Os08g0557900(-)	K00763+K03787+K01240+K03787+K00278+K11416+K00858+K00763+K00858+K01240
Metabolism	Biosynthesis of other secondary metabolites	Indole alkaloid biosynthesis	3	4	0.0585673	0.199287	ko00901	Os08g0140300(TDC1);Os07g0437500(TDC2);Os08g0140500(OsTDC3)	K01593+K01593+K01593
Metabolism	Biosynthesis of other secondary metabolites	Biosynthesis of various secondary metabolites - part 2	3	4	0.0585673	0.199287	ko00998	Os12g0263800(-);Os12g0263600(-);Os12g0263200(-)	K21568+K21568+K21568
Metabolism	Metabolism of terpenoids and polyketides	Limonene and pinene degradation	5	9	0.0599359	0.199287	ko00903	Os03g0310400(-);Os02g0730000(OsALDH2a);Os06g0270900(OsALDH2B1);Os11g0186200(OsALDH3H2);Os02g0646500(OS-ALDH)	K01692+K00128+K00128+K00128+K00128
Metabolism	Biosynthesis of other secondary metabolites	Caffeine metabolism	2	2	0.0693232	0.224878	ko00232	Os03g0429800(-);Os01g0865100(-)	K00106+K00365
Organismal Systems	Environmental adaptation	Circadian rhythm - plant	18	51	0.0992672	0.314346	ko04712	Os04g0452100(OsCRY1b);Os09g0532400(OsPRR95);Os03g0309200(PHYB);Os03g0719800(PHYA);Os07g0495100(CK2beta3);Os10g0564900(-);Os05g0571000(OsWD40-123);Os11g0157600(OsPRR59);Os06g0142600(HD3B);Os03g0762000(HD6);Os07g0695100(Hd2);Os02g0771100(PPS);Os03g0207300(CK2alpha3);Os02g0150800(OsZTL1);Os01g0182600(GI);Os03g0284100(OsPRR73);Os02g0828566(-);Os01g0286100(PIL15)	K12118+K12130+K12121+K12120+K03115+K03115+K16240+K12130+K12125+K03097+K12129+K10143+K03097+K12115+K12124+K12129+K16221+K12126
Metabolism	Biosynthesis of other secondary metabolites	Tropane, piperidine and pyridine alkaloid biosynthesis	13	35	0.105634	0.326727	ko00960	Os02g0302700(OsNAAT2);Os01g0760600(-);Os06g0345200(OsNAAT4);Os02g0236000(-);Os06g0338200(OsDAO1);Os06g0548000(-);Os11g0644800(-);Os02g0797500(AST);Os01g0871300(-);Os03g0269100(OsSAG13);Os02g0302200(-);Os02g0709200(-);Os03g0268900(-)	K00815+K14454+K00815+K14455+K00276+K14455+K00815+K00811+K15849+K08081+K00815+K00817+K08081
Metabolism	Metabolism of cofactors and vitamins	Thiamine metabolism	9	23	0.124974	0.377763	ko00730	Os04g0671100(-);Os01g0931400(ROX1);Os08g0566000(-);Os08g0118900(-);Os03g0306900(-);Os01g0356500(OsSTA15);Os12g0236400(ADK-A);Os07g0190000(OsDXS);Os08g0288200(-)	K00939+K00949+K22911+K00939+K20896+K00949+K00939+K01662+K00939
Metabolism	Amino acid metabolism	Cysteine and methionine metabolism	40	129	0.132605	0.383524	ko00270	Os08g0342400(-);Os08g0447000(-);Os03g0161800(Sip2A);Os02g0302700(OsNAAT2);Os02g0611200(SAMDC2);Os12g0625000(rcs1);Os01g0760600(-);Os09g0451000(ACO1);Os06g0112200(OsMTN);Os06g0345200(OsNAAT4);Os02g0236000(-);Os08g0434300(MDH);Os06g0548000(-);Os10g0478200(OscMDH);Os11g0644800(-);Os06g0149900(-);Os01g0580500(ACO7);Os11g0216900(OsIDI2);Os04g0669800(OsMTK);Os04g0165700(OsCAS);Os02g0797500(AST);Os01g08…	K12524+K00058+K08967+K00815+K01611+K01738+K14454+K05933+K01244+K00815+K14455+K00026+K14455+K00025+K00815+K01738+K05933+K08963+K00899+K13034+K00811+K00026+K00789+K00815+K00928+K00899+K21456+K00026+K01738+K01011+K00797+K00026+K16054+K01611+K00558+K01762+K08967+K01919+K00826+K01739
Metabolism	Global and overview maps	Biosynthesis of secondary metabolites	425	1549	0.132648	0.383524	ko01110	Os07g0677100(POX8.1);Os08g0342400(-);Os08g0206600(-);Os06g0726400(SBE1);Os07g0627000(DPE1);Os04g0486950(-);Os02g0627100(OsPAL1);Os03g0181500(ONI1);Os01g0654500(-);Os07g0676900(prx109);Os02g0569400(CYP76M8);Os02g0570700(Oscyp71Z7);Os03g0425300(-);Os02g0559400(OPR8);Os10g0194200(OsCAD1);Os03g0126000(-);Os05g0526900(OsUGT706D2);Os06g0214900(-);Os02g0206400(-);Os03g0184000(PDS1);Os02g0187800(GH2);Os0…	K00430+K12524+K00602+K00700+K00705+K01638+K10775+K15397+K00031+K00430+K16084+K21291+K00901+K05894+K00083+K00766+K22845+K17872+K13496+K02293+K00083+K00106+K15919+K16085+K00249+K00606+K00939+K01814+K13065+K01723+K01193+K00058+K14190+K00030+K06981+K00895+K21719+K01079+K01803+K11262+K01057+K08099+K01885+K00430+K00815+K01823+K11517+K14759+K13065+K00430+K14036+K09753+K22845+K01817+K00700+K13035+K09837+…
Metabolism	Global and overview maps	2-Oxocarboxylic acid metabolism	22	67	0.141585	0.400655	ko01210	Os01g0654500(-);Os02g0595500(OsIDHc);Os01g0652600(-);Os01g0760600(-);Os02g0236000(-);Os06g0210200(-);Os06g0548000(-);Os02g0797500(AST);Os02g0690800(-);Os04g0508200(-);Os07g0108300(ALT-2);Os01g0927900(-);Os02g0194100(-);Os01g0276100(OsIDHa);Os04g0479200(-);Os08g0511900(-);Os05g0129100(-);Os10g0390500(ALAAT);Os02g0232400(-);Os03g0231600(-);Os07g0461900(-);MSTRG.684(Os05g0573700)	K00031+K00030+K00053+K14454+K14455+K14677+K14455+K00811+K01438+K00031+K14272+K00928+K01647+K00030+K00030+K14677+K00818+K00814+K01647+K00826+K00818+K00053
Metabolism	Amino acid metabolism	Alanine, aspartate and glutamate metabolism	19	59	0.187972	0.518474	ko00250	Os02g0112900(OsGABA-T);Os08g0465800(OsGAD1);Os08g0502700(-);Os05g0536400(-);Os01g0760600(-);Os04g0650700(OsASNase2);Os02g0236000(-);Os06g0548000(-);Os08g0205900(-);Os04g0543900(OsGDH2);Os02g0797500(AST);Os07g0108300(ALT-2);Os02g0134400(OsLASPO);Os03g0597600(OsASNase1);Os04g0614600(OSL2);Os01g0558200(-);Os10g0390500(ALAAT);Os03g0236200(OsGAD3);Os02g0650900(OsGDH3)	K16871+K01580+K00830+K00294+K14454+K13051+K14455+K14455+K16871+K00261+K00811+K14272+K00278+K13051+K16871+K00262+K00814+K01580+K00261
Metabolism	Biosynthesis of other secondary metabolites	Betalain biosynthesis	3	6	0.191017	0.518474	ko00965	Os08g0140300(TDC1);Os07g0437500(TDC2);Os08g0140500(OsTDC3)	K01593+K01593+K01593
Metabolism	Metabolism of terpenoids and polyketides	Diterpenoid biosynthesis	17	53	0.210333	0.559487	ko00904	Os02g0569400(CYP76M8);Os02g0570700(Oscyp71Z7);Os04g0178400(-);Os06g0569500(KO4);Os02g0570400(OsKS7);Os04g0180400(CYP99A2);Os04g0179200(OsMAS);Os01g0561600(CYP76M14);Os12g0491800(OsKSL10);Os02g0571900(CYP76M6);Os02g0571100(OsCPS2);Os04g0178300(OsCPS4);Os04g0179700(OsKS4);Os06g0599200(-);Os06g0568600(OsKO5);Os02g0569900(OsCYP76M7);Os11g0474800(OsKS8)	K16084+K21291+K16085+K21719+K14036+K16085+K13070+K16084+K14037+K21718+K04120+K14043+K14046+K16084+K04122+K16084+K14044
Metabolism	Carbohydrate metabolism	Glycolysis / Gluconeogenesis	47	161	0.226673	0.58484	ko00010	Os08g0345700(OsPFPA3);Os03g0754200(-);Os11g0210300(ADH1);Os03g0266200(OsEno3);Os02g0105200(-);Os10g0405600(OsPFK10);Os06g0608700(OsAld-Y);Os01g0118000(-);Os01g0866400(FR);Os06g0256500(Pgi2(Pgib));Os01g0276700(-);Os06g0151900(OsPFK06);Os09g0415800(OsPFK08);Os01g0847800(AKR3);Os03g0305000(-);Os08g0241600(-);Os02g0730000(OsALDH2a);Os06g0499900(-);Os08g0478800(-);Os03g0818100(-);Os11g0210600(Adh3);Os…	K00895+K01803+K18857+K01689+K00627+K00850+K01623+K01623+K03841+K01810+K00873+K00850+K00850+K00002+K01913+K01792+K00128+K00627+K01810+K03103+K00001+K00162+K00627+K00001+K01810+K00927+K01568+K01895+K00844+K00873+K00128+K14085+K00128+K00850+K01792+K00001+K00121+K00627+K00134+K00927+K00873+K01689+K00128+K01785+K01895+K01792+K01568
Metabolism	Nucleotide metabolism	Purine metabolism	32	107	0.228659	0.58484	ko00230	Os07g0613000(-);Os08g0206600(-);Os03g0328400(-);Os05g0161200(-);Os03g0378000(-);Os03g0429800(-);Os04g0671100(-);Os07g0204500(-);Os09g0442600(-);Os06g0617800(-);Os10g0457500(-);Os03g0100040(-);Os08g0118900(-);Os01g0276700(-);Os06g0665500(OsAAH);Os01g0709400(-);Os12g0123500(-);Os01g0865100(-);Os08g0436100(-);Os09g0553300(-);Os11g0216000(-);Os07g0492000(OsNDPK1);Os12g0597500(OsUAH);Os04g0504000(OsAP…	K00951+K00602+K14641+K00951+K01510+K00106+K00939+K03787+K00951+K00948+K01519+K00948+K00939+K00873+K02083+K03787+K14641+K00365+K01510+K18453+K00873+K00940+K18151+K00759+K00939+K00856+K00873+K01517+K13484+K00601+K00939+K01490
Metabolism	Amino acid metabolism	Histidine metabolism	8	23	0.24085	0.604397	ko00340	Os05g0400800(-);Os02g0541325(-);Os02g0730000(OsALDH2a);Os02g0709200(-);Os06g0270900(OsALDH2B1);Os09g0440300(ALDH7);Os11g0186200(OsALDH3H2);Os02g0646500(OS-ALDH)	K01814+K01590+K00128+K00817+K00128+K14085+K00128+K00128
Metabolism	Global and overview maps	Biosynthesis of amino acids	76	269	0.252798	0.619019	ko01230	Os08g0342400(-);Os01g0654500(-);Os03g0126000(-);Os05g0400800(-);Os08g0447000(-);Os02g0595500(OsIDHc);Os11g0629500(-);Os03g0754200(-);Os02g0302700(OsNAAT2);Os02g0266000(-);Os01g0652600(-);Os06g0709000(-);Os12g0625000(rcs1);Os03g0266200(OsEno3);Os01g0760600(-);Os06g0617800(-);Os10g0405600(OsPFK10);Os06g0345200(OsNAAT4);Os06g0608700(OsAld-Y);Os09g0565700(EIP3);Os02g0236000(-);Os01g0118000(-);Os06g02…	K12524+K00031+K00766+K01814+K00058+K00030+K01079+K01803+K00815+K01817+K00053+K15227+K01738+K01689+K14454+K00948+K00850+K00815+K01623+K05359+K14455+K01623+K14677+K14455+K00948+K00600+K06001+K00815+K01738+K00873+K13034+K00811+K00850+K01438+K00850+K15849+K01476+K00789+K00815+K00031+K14272+K01850+K00616+K12657+K01657+K01695+K01658+K00928+K10206+K01647+K00615+K00817+K00927+K01807+K00873+K01738+K00030+…
Metabolism	Metabolism of terpenoids and polyketides	Monoterpenoid biosynthesis	4	10	0.255985	0.619019	ko00902	Os04g0531750(-);Os04g0531900(-);Os04g0531700(-);Os04g0532400(-)	K15095+K15095+K15095+K15095
Metabolism	Lipid metabolism	Biosynthesis of unsaturated fatty acids	13	41	0.266716	0.621989	ko01040	Os04g0271200(OsPAS2);Os07g0417200(OsFAD2-2);Os02g0817700(OsI57);Os05g0460800(-);Os04g0558400(-);Os04g0116600(-);Os11g0605500(ACX2);Os07g0416900(OsFAD2-3);Os05g0163700(OsACX4);Os01g0919900(OsSSI2);Os06g0354500(ACX3);Os07g0416700(OsFAD2-4);Os06g0347100(-)	K10703+K10256+K07513+K10703+K01068+K10251+K00232+K10256+K00232+K03921+K00232+K10256+K00232
Metabolism	Glycan biosynthesis and metabolism	Various types of N-glycan biosynthesis	11	34	0.266824	0.621989	ko00513	Os04g0544900(-);Os02g0832800(GlcNAc-TI);Os08g0472600(OsFUT11);Os12g0170600(-);Os07g0417800(-);Os05g0519900(-);Os06g0229200(-);Os02g0798100(-);Os06g0245700(-);Os05g0209100(-);Os04g0606400(-)	K03847+K00726+K00753+K14412+K05531+K07151+K14413+K00736+K01231+K23741+K01230
Genetic Information Processing	Folding, sorting and degradation	Proteasome	20	66	0.271243	0.621989	ko03050	Os09g0326800(OsRpn1a);Os03g0695600(OsPBD1);Os03g0851300(OsRpn5);Os02g0600100(-);Os08g0550100(OsRpn3);Os05g0594800(-);Os07g0435100(OSRPN12);Os06g0167600(-);Os09g0538200(OsPAD1);Os04g0485000(OsRpn7);Os01g0267200(OsRpn11);Os02g0205300(OSRPT6);Os08g0224700(OsRpn2a);Os03g0243300(OsS5a);Os06g0699900(OsRpn1b);Os02g0199900(OsRpt4a);Os03g0298400(OSRPT2B);Os03g0214600(OsRpn9b);Os06g0173100(OsRpt5b);Os02g03…	K03028+K02734+K03035+K03037+K03033+K06691+K03031+K02728+K02731+K03037+K03030+K03066+K03032+K03029+K03028+K03064+K03062+K03039+K03065+K03063
Metabolism	Glycan biosynthesis and metabolism	Glycosylphosphatidylinositol(GPI)-anchor biosynthesis	9	28	0.305283	0.68818	ko00563	Os01g0580100(-);Os01g0682200(-);Os03g0670200(-);Os02g0781600(-);Os04g0678800(-);Os02g0688900(-);Os02g0219400(-);Os01g0907300(-);Os03g0378200(-)	K05286+K05289+K05284+K05310+K03434+K05293+K05290+K05291+K05283
Metabolism	Energy metabolism	Carbon fixation in photosynthetic organisms	27	93	0.311981	0.691558	ko00710	Os08g0562100(-);Os03g0754200(-);Os01g0760600(-);Os06g0608700(OsAld-Y);Os05g0427800(-);Os02g0236000(-);Os01g0118000(-);Os08g0434300(MDH);Os06g0548000(-);Os01g0866400(FR);Os10g0478200(OscMDH);Os10g0503500(-);Os05g0405000(flo4);Os01g0188400(NADP-ME);Os01g0829800(-);Os07g0108300(ALT-2);Os04g0266900(-);Os03g0773800(-);Os06g0668200(PGK);Os04g0306400(OsRPI);Os12g0632700(-);Os01g0723400(NADP-ME2);Os10g03…	K00051+K01803+K14454+K01623+K01601+K14455+K01623+K00026+K14455+K03841+K00025+K00028+K01006+K00029+K00026+K14272+K00615+K00026+K00927+K01807+K00026+K00029+K00814+K00134+K00927+K00051+K01601
Metabolism	Glycan biosynthesis and metabolism	Other types of O-glycan biosynthesis	4	11	0.323973	0.706368	ko00514	Os07g0587100(-);Os08g0559300(SPY);Os06g0180000(-);Os05g0386000(-)	K20783+K09667+K20782+K20782
Genetic Information Processing	Folding, sorting and degradation	Protein export	18	61	0.330827	0.709678	ko03060	Os05g0509500(-);Os06g0342100(SRP19);Os02g0178400(-);Os03g0844700(-);Os04g0446300(-);Os08g0254500(-);Os04g0307200(OsDjC43);Os03g0634000(-);Os11g0153700(-);Os06g0273800(OsSigP5);Os08g0323000(-);Os01g0889000(-);Os08g0480100(-);Os08g0524000(-);Os11g0195100(-);Os02g0435000(OsNSCC2);Os01g0772800(-);Os01g0501700(OsTATC)	K03106+K03105+K07342+K03217+K12947+K10956+K09540+K03116+K03106+K13280+K03107+K03108+K13431+K12272+K03070+K12275+K03106+K03118
Metabolism	Carbohydrate metabolism	Butanoate metabolism	11	36	0.340373	0.71523	ko00650	Os02g0112900(OsGABA-T);Os08g0465800(OsGAD1);Os03g0310400(-);Os01g0110400(-);Os08g0205900(-);Os03g0305000(-);Os01g0269000(-);Os08g0544900(-);Os04g0614600(OSL2);Os01g0796400(-);Os03g0236200(OsGAD3)	K16871+K01580+K01692+K00626+K16871+K01913+K01640+K01641+K16871+K00074+K01580
Metabolism	Metabolism of cofactors and vitamins	Ubiquinone and other terpenoid-quinone biosynthesis	17	58	0.349453	0.71523	ko00130	Os06g0214900(-);Os02g0302700(OsNAAT2);Os02g0581500(-);Os02g0276500(OsVTE1);Os06g0345200(OsNAAT4);Os11g0644800(-);Os03g0691400(-);Os10g0436800(-);Os08g0388900(-);Os09g0361500(ICS1);Os08g0130400(-);Os02g0302200(-);Os01g0784800(-);Os02g0581400(-);Os03g0152400(OsACS1);Os02g0605500(-);Os02g0168100(OsHPPD)	K17872+K00815+K14759+K09834+K00815+K00815+K19222+K03809+K06125+K02552+K14760+K00815+K03809+K14759+K01904+K12501+K00457
Genetic Information Processing	Folding, sorting and degradation	RNA degradation	36	128	0.353314	0.71523	ko03018	Os01g0872700(OsXrn3);Os03g0266200(OsEno3);Os10g0405600(OsPFK10);Os06g0300800(OsWD40-128);Os02g0782200(-);Os04g0613400(-);Os11g0176200(OsDSHCT);Os06g0151900(OsPFK06);Os09g0415800(OsPFK08);Os09g0123100(-);Os02g0294700(-);Os12g0102400(OsRINGC2-2);Os03g0166800(OsCCR4b);Os04g0467400(OsCAF1-3);Os11g0102800(OsRINGC2-1);Os02g0517300(-);Os02g0641800(OsRH8);Os04g0492900(-);Os01g0118100(-);Os02g0810300(OsAB…	K12619+K01689+K00850+K12616+K12605+K12606+K12598+K00850+K00850+K12607+K12617+K10643+K12603+K01148+K10643+K12617+K12614+K01148+K14442+K12608+K12614+K12611+K12600+K12586+K00850+K14442+K12591+K12611+K04043+K12614+K12581+K12617+K01689+K12620+K12580+K12617
Metabolism	Energy metabolism	Sulfur metabolism	12	40	0.354926	0.71523	ko00920	Os02g0805500(-);Os12g0625000(rcs1);Os08g0530400(OSMCP);Os05g0503300(-);Os07g0509800(OsAPRL1);Os01g0667200(GLYII-1);Os06g0149900(-);Os04g0165700(OsCAS);Os06g0564500(-);Os02g0167100(OsStr23);Os04g0535400(-);Os03g0376100(-)	K01082+K01738+K00387+K00392+K05907+K17725+K01738+K13034+K01738+K01011+K22966+K01739
Metabolism	Lipid metabolism	Ether lipid metabolism	10	33	0.363919	0.722406	ko00565	Os05g0358700(OsPLDzeta1);Os02g0119800(-);Os03g0826600(NPC1);Os01g0762000(OspPLAIValpha);Os01g0310100(OsPLDzeta2);Os01g0172400(OsPLDalpha1);Os05g0357800(-);Os06g0604400(OsPLDalpha3);Os03g0810900(OspPLAIVbeta);Os03g0852800(OsNPC3)	K01115+K00993+K01114+K14674+K01115+K01115+K13510+K01115+K14674+K01114
Metabolism	Lipid metabolism	Arachidonic acid metabolism	6	19	0.383356	0.738932	ko00590	Os03g0829100(-);Os01g0762000(OspPLAIValpha);Os03g0358100(OsGpx2);Os04g0556300(OsGpx1);Os03g0810900(OspPLAIVbeta);Os02g0664000(OsGpx3)	K08726+K14674+K00432+K00432+K14674+K00432
Metabolism	Metabolism of cofactors and vitamins	One carbon pool by folate	6	19	0.383356	0.738932	ko00670	Os08g0206600(-);Os11g0484400(-);Os05g0429000(OsSHM5);Os12g0168000(-);Os04g0623800(Amt);Os08g0500900(-)	K00602+K13998+K00600+K01934+K00605+K00601
Metabolism	Metabolism of cofactors and vitamins	Porphyrin and chlorophyll metabolism	15	52	0.390736	0.742399	ko00860	Os10g0419600(OsCHL);Os01g0271200(-);Os01g0227100(NYC1);Os01g0949400(Se13);Os02g0168800(PBD);Os03g0654600(NOL);Os10g0389200(OsRCCR1);Os04g0490100(-);Os04g0692600(-);Os03g0146400(OsPAO);Os01g0527700(-);Os09g0532000(SGR);Os03g0186100(UROS);Os10g0389300(OsRCCR2);Os03g0337600(UroD)	K08099+K01885+K13606+K08101+K01749+K13606+K13545+K00231+K22013+K13071+K02257+K22013+K01719+K13545+K01599
Metabolism	Carbohydrate metabolism	Galactose metabolism	19	67	0.397954	0.745463	ko00052	Os07g0687900(wsi76);Os02g0534400(OSCIN1);Os10g0492900(-);Os05g0539400(OsBgal9);Os10g0405600(OsPFK10);Os06g0151900(OsPFK06);Os09g0415800(OsPFK08);Os09g0255000(OSINV1);Os05g0187100(HXK7);Os09g0526700(OsUGE3);Os01g0191700(OsPFK01);Os09g0323000(OsUGE4);Os01g0952600(-);Os07g0171200(GalT);Os05g0595100(OsUGE1);Os07g0209100(-);Os10g0493600(alphaGa1);Os10g0155500(-);Os07g0679300(alpha-Gal)	K18819+K01193+K07407+K12309+K00850+K00850+K00850+K01193+K00844+K01784+K00850+K01784+K01190+K00965+K01784+K06617+K07407+K01785+K07407
Metabolism	Metabolism of cofactors and vitamins	Folate biosynthesis	10	34	0.404375	0.74697	ko00790	Os11g0484400(-);Os07g0618500(-);Os04g0662700(-);Os12g0507000(-);Os02g0592200(-);Os04g0661600(-);Os05g0517500(-);Os05g0244700(OsAT-IV);Os06g0670000(-);Os02g0258900(-)	K13998+K13941+K01495+K03639+K01113+K15376+K01307+K18482+K15631+K03639
Metabolism	Lipid metabolism	Synthesis and degradation of ketone bodies	3	9	0.436741	0.783199	ko00072	Os01g0110400(-);Os01g0269000(-);Os08g0544900(-)	K00626+K01640+K01641
Metabolism	Global and overview maps	Fatty acid metabolism	25	91	0.441871	0.783199	ko01212	Os07g0675000(-);Os10g0363300(ACC1);Os01g0348600(-);Os03g0310400(-);Os01g0110400(-);Os04g0271200(OsPAS2);Os07g0417200(OsFAD2-2);Os02g0817700(OsI57);Os02g0274100(AIM1);Os05g0460800(-);Os07g0561500(-);Os05g0317200(LACS8);Os01g0681200(-);Os04g0116600(-);Os11g0605500(ACX2);Os07g0416900(OsFAD2-3);Os11g0147000(-);Os01g0655800(-);Os05g0163700(OsACX4);Os01g0919900(OsSSI2);Os06g0354500(ACX3);Os02g0196900(-…	K00249+K11262+K10527+K01692+K00626+K10703+K10256+K07513+K10527+K10703+K00059+K01897+K01897+K10251+K00232+K10256+K01897+K01897+K00232+K03921+K00232+K09458+K10256+K00232+K00059
Metabolism	Metabolism of cofactors and vitamins	Pantothenate and CoA biosynthesis	10	35	0.444915	0.783199	ko00770	Os01g0225400(-);Os01g0652600(-);Os02g0736400(OsDHODH1);Os01g0360600(-);Os07g0485100(-);Os01g0807900(-);Os06g0207000(-);Os03g0231600(-);Os08g0176100(-);MSTRG.684(Os05g0573700)	K00606+K00053+K00207+K00859+K01431+K01464+K09680+K00826+K01922+K00053
Metabolism	Amino acid metabolism	Lysine degradation	14	50	0.447542	0.783199	ko00310	Os08g0180100(OsSET27);Os03g0310400(-);Os01g0110400(-);Os02g0730000(OsALDH2a);Os03g0307800(IEZ1);Os02g0783700(-);Os09g0362900(OsSET35);Os05g0490700(OsSET22);Os06g0270900(OsALDH2B1);Os09g0440300(ALDH7);Os11g0186200(OsALDH3H2);Os02g0646500(OS-ALDH);Os04g0394200(-);Os04g0544100(OsSET20)	K22748+K01692+K00626+K00128+K11430+K14157+K11420+K11420+K00128+K14085+K00128+K00128+K00658+K11420
Metabolism	Biosynthesis of other secondary metabolites	Anthocyanin biosynthesis	1	2	0.457389	0.790036	ko00942	Os07g0148200(-)	K12930
Metabolism	Energy metabolism	Photosynthesis - antenna proteins	5	17	0.477189	0.813668	ko00196	Os08g0435900(cab);Os09g0346500(CAB1R);Os02g0764500(-);Os03g0592500(LHCB);Os06g0320500(-)	K08910+K08912+K08911+K08913+K08907
Metabolism	Metabolism of other amino acids	Cyanoamino acid metabolism	18	67	0.507455	0.854324	ko00460	Os02g0635200(NIT1);Os04g0650700(OsASNase2);Os01g0930800(Os1bglu5);Os05g0429000(OsSHM5);Os04g0165700(OsCAS);Os04g0474900(OsTAGG1);Os05g0366600(Os5bglu22);Os01g0764900(-);Os03g0749500(-);Os12g0512800(OsCYP71E5);Os03g0597600(OsASNase1);Os04g0513400(Os4bglu16);Os05g0449600(-);Os09g0511700(Os9bglu32);Os03g0749300(OsBGLU1);Os04g0474800(Os4bglu12);Os09g0511600(Os9bglu31);MSTRG.19312(BGLU15)	K13035+K13051+K01188+K00600+K13034+K01188+K01188+K01455+K01188+K13029+K13051+K05350+K05349+K01188+K05349+K01188+K01188+K05350
Metabolism	Glycan biosynthesis and metabolism	Glycosphingolipid biosynthesis - globo and isoglobo series	3	10	0.514208	0.85487	ko00603	Os10g0492900(-);Os10g0493600(alphaGa1);Os07g0679300(alpha-Gal)	K07407+K07407+K07407
Metabolism	Metabolism of cofactors and vitamins	Vitamin B6 metabolism	4	14	0.525335	0.860314	ko00750	Os03g0115500(-);Os10g0377800(-);Os07g0100200(OsPDX1.3a);Os10g0100700(OsPDX1.3b)	K00275+K23998+K06215+K06215
Metabolism	Glycan biosynthesis and metabolism	Other glycan degradation	5	18	0.533985	0.860314	ko00511	Os05g0539400(OsBgal9);Os10g0339600(-);Os07g0444000(-);Os10g0140200(-);Os01g0952600(-)	K12309+K15923+K17108+K01191+K01190
Metabolism	Lipid metabolism	Steroid biosynthesis	12	45	0.536888	0.860314	ko00100	Os10g0545200(OsGL1-10);Os01g0103600(-);Os01g0762000(OspPLAIValpha);Os01g0211600(-);Os11g0707600(OsGL1-11);Os01g0134500(OsSTE1);Os03g0810900(OspPLAIVbeta);Os07g0101500(OsGL1-8);Os07g0200700(-);Os02g0139700(OsOSC2);Os03g0231800(-);Os09g0103100(-)	K14423+K01824+K14674+K09832+K14424+K00227+K14674+K14424+K00801+K01853+K00511+K01052
Metabolism	Amino acid metabolism	Glycine, serine and threonine metabolism	22	84	0.554161	0.871032	ko00260	Os08g0342400(-);Os01g0228600(OsHPR2-1);Os08g0447000(-);Os11g0629500(-);Os08g0502700(-);Os01g0682500(-);Os06g0338200(OsDAO1);Os04g0555900(SERR);Os05g0429000(OsSHM5);Os06g0632200(TS);Os08g0424500(SK2(T)(SCL);Os07g0108300(ALT-2);Os07g0182100(OsTSA);Os04g0464200(BAD1);Os01g0927900(-);Os02g0101500(OsHPR1);Os09g0440300(ALDH7);Os04g0107200(-);Os08g0135900(TS);Os04g0107500(-);Os04g0623800(Amt);Os06g06987…	K12524+K15919+K00058+K01079+K00830+K15918+K00276+K12235+K00600+K06001+K00130+K14272+K01695+K00130+K00928+K15893+K14085+K15919+K01696+K15919+K00605+K00499
Metabolism	Lipid metabolism	alpha-Linolenic acid metabolism	16	61	0.556674	0.871032	ko00592	Os02g0559400(OPR8);Os03g0225900(AOS2);Os01g0348600(-);Os11g0210300(ADH1);Os01g0762000(OspPLAIValpha);Os02g0817700(OsI57);Os02g0274100(AIM1);Os09g0513100(-);Os05g0304600(OsLOX7);Os11g0605500(ACX2);Os08g0509100(OsLOX8);Os03g0810900(OspPLAIVbeta);Os04g0615100(-);Os05g0163700(OsACX4);Os06g0354500(ACX3);Os06g0347100(-)	K05894+K01723+K10527+K18857+K14674+K07513+K10527+K22389+K00454+K00232+K00454+K14674+K22389+K00232+K00232+K00232
Metabolism	Amino acid metabolism	Tryptophan metabolism	21	81	0.576236	0.891156	ko00380	Os09g0528700(OsCYP76M7);Os04g0475600(-);Os03g0310400(-);Os01g0110400(-);Os06g0328900(-);Os09g0344500(ZRP4);Os06g0727200(CATB);Os10g0515200(-);Os02g0730000(OsALDH2a);Os08g0102000(OsSNAT2);Os08g0140300(TDC1);Os04g0118100(OsAMI1);Os07g0437500(TDC2);Os02g0592000(-);Os06g0270900(OsALDH2B1);Os09g0440300(ALDH7);Os11g0186200(OsALDH3H2);Os02g0115700(CATA1);Os08g0140500(OsTDC3);Os02g0646500(OS-ALDH);Os04g0…	K07408+K23947+K01692+K00626+K07408+K22588+K03781+K07408+K00128+K22450+K01593+K01426+K01593+K23947+K00128+K14085+K00128+K03781+K01593+K00128+K00658
Metabolism	Carbohydrate metabolism	Starch and sucrose metabolism	51	197	0.585368	0.894872	ko00500	Os06g0726400(SBE1);Os07g0627000(DPE1);Os02g0534400(OSCIN1);Os04g0409200(OsBEIIa);Os05g0533600(SSIVB);Os08g0520900(OsPHS8);Os01g0930800(Os1bglu5);Os02g0790500(OsTPS5);Os01g0715400(OsSTA30);Os08g0224500(-);Os03g0340500(SUS4);Os02g0129600(-);Os06g0256500(Pgi2(Pgib));Os02g0184400(OsSPS2);Os03g0401300(SUS1);Os01g0236800(OsBamy4);Os01g0730300(OsTPS3);Os04g0474900(OsTAGG1);Os08g0478800(-);Os05g0366600(O…	K00700+K00705+K01193+K00700+K00703+K01214+K01188+K16055+K01176+K19893+K00695+K01177+K01810+K00696+K00695+K01177+K16055+K01188+K01810+K01188+K16055+K01193+K00703+K01087+K01087+K01188+K01810+K00696+K07024+K01194+K05350+K00975+K00695+K00844+K05349+K01188+K16055+K16055+K05349+K01177+K00703+K00703+K01188+K01087+K16055+K00703+K00975+K07024+K01188+K05350+K16055
Genetic Information Processing	Folding, sorting and degradation	Protein processing in endoplasmic reticulum	61	236	0.594389	0.897134	ko04141	Os02g0664200(-);Os02g0181800(-);Os03g0733800(ERO1);Os09g0407200(OsRAD23);Os08g0430200(RAD23);Os03g0216600(-);Os01g0921200(OsMOGS);Os05g0104900(OsPUB66);Os12g0636000(OsRDCP5);Os03g0822700(-);Os01g0254000(OsARL1d);Os01g0276800(Gas2);Os04g0549600(OsDjA6);Os02g0178400(-);Os03g0266300(Oshsp17.9A);Os01g0819500(OsUBC22);Os02g0708300(OsRBX1a);Os05g0149600(OsCUL1-2);Os05g0460200(OsUBC12);Os07g0484300(-);O…	K11718+K14016+K10950+K10839+K10839+K05546+K01228+K09561+K10666+K09562+K07953+K08288+K09503+K07342+K13993+K06689+K03868+K03347+K10575+K10636+K09503+K09518+K14007+K09523+K10085+K08852+K03283+K13525+K10666+K06689+K07151+K10956+K09503+K09540+K14007+K06689+K04554+K14006+K03094+K04523+K10575+K13989+K10088+K10597+K03347+K23741+K14005+K01230+K13249+K10578+K10084+K06689+K14012+K14003+K12275+K13993+K06689+…
Metabolism	Biosynthesis of other secondary metabolites	Aflatoxin biosynthesis	1	3	0.600338	0.897134	ko00254	Os10g0363300(ACC1)	K11262
Metabolism	Lipid metabolism	Linoleic acid metabolism	5	20	0.637978	0.918211	ko00591	Os01g0762000(OspPLAIValpha);Os05g0304600(OsLOX7);Os08g0509100(OsLOX8);Os03g0810900(OspPLAIVbeta);Os03g0700700(OsLOX1)	K14674+K00454+K00454+K14674+K15718
Metabolism	Metabolism of cofactors and vitamins	Riboflavin metabolism	5	20	0.637978	0.918211	ko00740	Os11g0300400(-);Os03g0238600(OsPAP3c);Os02g0473000(-);Os09g0553300(-);Os10g0464400(-)	K20860+K14379+K11752+K18453+K20884
Metabolism	Metabolism of terpenoids and polyketides	Sesquiterpenoid and triterpenoid biosynthesis	5	20	0.637978	0.918211	ko00909	Os07g0218200(TPS3);Os03g0184550(-);Os07g0200700(-);Os03g0231800(-);MSTRG.18365(TPS7)	K15803+K15891+K00801+K00511+K15803
Genetic Information Processing	Folding, sorting and degradation	Sulfur relay system	4	16	0.642058	0.918211	ko04122	Os12g0507000(-);Os02g0762300(-);Os02g0167100(OsStr23);Os02g0258900(-)	K03639+K14168+K01011+K03639
Metabolism	Glycan biosynthesis and metabolism	Glycosaminoglycan degradation	4	17	0.692787	0.978151	ko00531	Os05g0155700(-);Os05g0539400(OsBgal9);Os01g0931100(-);Os03g0211700(-)	K10532+K12309+K10532+K07964
Environmental Information Processing	Signal transduction	MAPK signaling pathway - plant	53	212	0.698679	0.978151	ko04016	Os05g0539800(OsRTH2);Os10g0564500(SAPK3);Os04g0556000(HMA5);Os06g0665800(HMA9);Os03g0310800(-);Os07g0129300(OsPR1);Os03g0701700(OS-ERS1);Os01g0734200(rbohA);Os04g0432000(SAPK7);Os05g0474800(OsWRKY70);Os09g0325700(PP2C1);Os08g0453700(RbohF);Os07g0416100(-);Os08g0157000(OsMAPK2);Os03g0743500(OsCML4);Os03g0764800(SAPK8);Os02g0135200(OsMPK13);Os06g0191300(OsMKK5);Os01g0382000(OsPR1b);Os05g0491100(CAL…	K20726+K14498+K17686+K17686+K02183+K13449+K14509+K13447+K14498+K13424+K14497+K13447+K13424+K20600+K02183+K14498+K20538+K13413+K13449+K02183+K14497+K03781+K20547+K14496+K20726+K14515+K17686+K13449+K20717+K20535+K20726+K14516+K13414+K14510+K20553+K13447+K20538+K13449+K14498+K14515+K13414+K00940+K20717+K14498+K03781+K13449+K17686+K02183+K14498+K14497+K02183+K14498+K02183
Environmental Information Processing	Membrane transport	ABC transporters	12	51	0.725846	1	ko02010	Os05g0196100(OsABCC14);Os04g0209300(OsABCC10);Os06g0184700(OsABCC12);Os03g0280000(OsABCB13);Os04g0209200(OsABCC9);Os01g0911300(OsABCB24);Os02g0190300(OsABCB9);Os01g0356400(OsABCC8);Os01g0534700(OsABCB3);Os03g0142800(OsABCC13);MSTRG.2641(ABCB11);MSTRG.9253(--)	K05665+K05665+K05674+K05658+K05665+K05656+K05658+K05665+K05658+K05665+K05658+K05665
Metabolism	Metabolism of other amino acids	Taurine and hypotaurine metabolism	2	9	0.730822	1	ko00430	Os08g0465800(OsGAD1);Os03g0236200(OsGAD3)	K01580+K01580
Genetic Information Processing	Translation	mRNA surveillance pathway	30	124	0.739282	1	ko03015	Os01g0939500(-);Os08g0187700(-);Os08g0427900(-);Os08g0180000(-);Os02g0617600(-);Os07g0693900(-);Os03g0347200(-);Os03g0754900(OsWD40-93);Os02g0820000(OsPP41);Os06g0319600(-);Os04g0659900(LML1);Os04g0252200(-);Os01g0349400(OsPP5);Os05g0373900(-);Os02g0191700(-);Os11g0176100(-);Os02g0217600(OsPP2A-3);Os06g0677700(OsC3H45);Os04g0677800(-);Os04g0440100(UPF3);Os09g0566100(-);Os02g0780600(-);Os03g026800…	K03265+K14400+K12881+K00565+K04354+K06100+K12882+K14406+K06269+K14376+K06965+K14401+K06269+K03265+K11583+K14407+K04382+K14404+K14416+K14328+K14400+K00565+K06269+K14397+K13917+K04354+K04382+K03265+K14398+K14326
Metabolism	Amino acid metabolism	Lysine biosynthesis	3	15	0.798442	1	ko00300	Os08g0342400(-);Os01g0927900(-);Os03g0299900(OsAGD2)	K12524+K00928+K10206
Metabolism	Lipid metabolism	Fatty acid elongation	10	46	0.808538	1	ko00062	Os03g0181500(ONI1);Os05g0574600(OsCHS);Os04g0271200(OsPAS2);Os05g0460800(-);Os04g0558400(-);Os04g0116600(-);Os03g0382100(-);Os02g0731900(-);Os05g0568000(KCS1);MSTRG.4776(KCS1)	K15397+K15397+K10703+K10703+K01068+K10251+K15397+K15397+K15397+K15397
Metabolism	Carbohydrate metabolism	Ascorbate and aldarate metabolism	14	63	0.811765	1	ko00053	Os12g0612100(-);Os08g0114300(-);Os02g0730000(OsALDH2a);Os12g0482700(-);Os08g0549100(OsAPx4);Os08g0557600(OsMDAR4);Os08g0151800(OsMDAR5);Os06g0270900(OsALDH2B1);Os09g0440300(ALDH7);Os11g0186200(OsALDH3H2);Os04g0434800(OsAPx7);Os07g0694700(APX2);Os02g0646500(OS-ALDH);Os09g0567300(MDHAR)	K14190+K00103+K00128+K17744+K00434+K08232+K08232+K00128+K14085+K00128+K00434+K00434+K00128+K08232
Metabolism	Biosynthesis of other secondary metabolites	Flavone and flavonol biosynthesis	2	11	0.829294	1	ko00944	Os01g0176000(OsUGT98B1);Os01g0176200(-)	K22771+K22771
Metabolism	Glycan biosynthesis and metabolism	Glycosphingolipid biosynthesis - ganglio series	1	6	0.840358	1	ko00604	Os05g0539400(OsBgal9)	K12309
Metabolism	Metabolism of terpenoids and polyketides	Brassinosteroid biosynthesis	5	26	0.853815	1	ko00905	Os02g0204700(OsCYP734A2);Os12g0139300(OsCPD2);Os06g0600400(OsCYP734A4);Os01g0197100(D2);Os03g0227700(OsDWF4)	K15639+K09588+K15639+K09589+K09587
Metabolism	Metabolism of other amino acids	Selenocompound metabolism	4	22	0.869817	1	ko00450	Os05g0105050(-);Os05g0105000(-);Os12g0287300(OsISC2);Os03g0376100(-)	K08247+K08247+K11717+K01739
Metabolism	Biosynthesis of other secondary metabolites	Monobactam biosynthesis	2	13	0.894042	1	ko00261	Os08g0342400(-);Os01g0927900(-)	K12524+K00928
Metabolism	Carbohydrate metabolism	Fructose and mannose metabolism	15	73	0.89945	1	ko00051	Os08g0345700(OsPFPA3);Os03g0754200(-);Os03g0294200(OsF2KP2);Os10g0405600(OsPFK10);Os06g0608700(OsAld-Y);Os03g0115100(-);Os01g0118000(-);Os01g0866400(FR);Os06g0151900(OsPFK06);Os09g0415800(OsPFK08);Os05g0187100(HXK7);Os01g0191700(OsPFK01);Os08g0545200(OsDH1);Os07g0669100(OsXYLA1);Os06g0652400(-)	K00895+K01803+K01103+K00850+K01623+K05305+K01623+K03841+K00850+K00850+K00844+K00850+K00008+K01805+K02377
Metabolism	Energy metabolism	Nitrogen metabolism	7	39	0.920553	1	ko00910	Os10g0471300(OsCYN);Os08g0470200(OsalphaCA6);Os04g0543900(OsGDH2);Os01g0764900(-);Os02g0770800(OsNIA1);Os01g0558200(-);Os02g0650900(OsGDH3)	K01725+K01674+K00261+K01455+K10534+K00262+K00261
Metabolism	Biosynthesis of other secondary metabolites	Flavonoid biosynthesis	12	62	0.923098	1	ko00941	Os05g0526900(OsUGT706D2);Os11g0182200(-);Os04g0500700(OsHCT1);Os05g0526800(OsUGT706D3);Os01g0735900(OsUGT706B1);Os10g0116400(-);Os04g0630800(-);Os05g0527000(OsUGT706C3);Os06g0343600(-);Os12g0240900(NOMT);Os04g0664600(-);Os09g0481400(-)	K22845+K13065+K13065+K22845+K22845+K22845+K08695+K22845+K22845+K22440+K13065+K00588
Genetic Information Processing	Replication and repair	Nucleotide excision repair	17	86	0.938971	1	ko03420	Os09g0407200(OsRAD23);Os01g0253600(OsRPA14);Os08g0430200(RAD23);Os11g0473100(MAT1);Os01g0846000(-);Os02g0708300(OsRBX1a);Os03g0855700(-);Os01g0141700(OsWD40-2);Os05g0144800(OsXPD);Os01g0585400(-);Os02g0125800(-);Os03g0100400(XPF);Os08g0338200(-);Os08g0427500(XPC);Os02g0776800(RPA1A);Os01g0636700(CSB);MSTRG.967(--)	K10839+K10740+K10839+K10842+K07466+K03868+K07466+K10140+K10844+K10610+K03143+K10848+K03141+K10838+K07466+K10841+K07466
Genetic Information Processing	Translation	Aminoacyl-tRNA biosynthesis	12	64	0.941187	1	ko00970	Os05g0163000(-);Os01g0271200(-);Os06g0103600(-);Os03g0111700(-);Os10g0506200(OsValRS3);Os01g0743400(-);Os03g0694900(OsValRS1);Os05g0558900(PAL11);Os02g0686400(-);Os06g0245800(-);Os01g0559100(-);Os02g0623500(-)	K01887+K01885+K14164+K01873+K01873+K01867+K01873+K01890+K22503+K01872+K01875+K04567
Environmental Information Processing	Signal transduction	Plant hormone signal transduction	63	280	0.942809	1	ko04075	Os03g0180800(TIFY11A);Os05g0515400(OsARF14);Os01g0190300(OsIAA2);Os04g0653000(EG2);Os10g0564500(SAPK3);Os06g0714300(OsSAUR29);Os07g0182400(OsIAA24);Os07g0592600(GH3-8);Os01g0231000(OsIAA3);Os07g0129300(OsPR1);Os03g0701700(OS-ERS1);Os04g0432000(SAPK7);Os11g0143300(OSRR9);Os09g0325700(PP2C1);Os01g0764800(GH3-2);Os08g0557700(AHP1);Os06g0183100(ORR2);Os12g0609200(-);Os01g0808100(OsbZIP08);Os03g076480…	K13464+K14486+K14484+K13464+K14498+K14488+K14484+K14487+K14484+K13449+K14509+K14498+K14492+K14497+K14487+K14490+K14491+K13464+K14431+K14498+K14485+K13413+K14431+K14491+K13449+K14497+K14488+K14490+K13946+K14494+K14489+K14496+K14515+K14486+K14491+K13449+K14516+K14488+K14510+K13449+K14502+K14498+K13946+K14515+K13464+K14500+K14431+K14498+K13449+K14486+K14484+K14500+K13463+K14491+K14486+K14498+K14497+…
Metabolism	Biosynthesis of other secondary metabolites	Glucosinolate biosynthesis	1	10	0.953078	1	ko00966	Os03g0231600(-)	K00826
Metabolism	Metabolism of cofactors and vitamins	Biotin metabolism	3	22	0.954172	1	ko00780	Os07g0561500(-);Os02g0196900(-);Os10g0456100(-)	K00059+K09458+K00059
Metabolism	Lipid metabolism	Fatty acid biosynthesis	9	52	0.955148	1	ko00061	Os10g0363300(ACC1);Os07g0561500(-);Os05g0317200(LACS8);Os01g0681200(-);Os11g0147000(-);Os01g0655800(-);Os01g0919900(OsSSI2);Os02g0196900(-);Os10g0456100(-)	K11262+K00059+K01897+K01897+K01897+K01897+K03921+K09458+K00059
Metabolism	Biosynthesis of other secondary metabolites	Stilbenoid, diarylheptanoid and gingerol biosynthesis	4	28	0.96022	1	ko00945	Os11g0182200(-);Os04g0500700(OsHCT1);Os04g0664600(-);Os09g0481400(-)	K13065+K13065+K13065+K00588
Genetic Information Processing	Replication and repair	Non-homologous end-joining	1	11	0.965456	1	ko03450	Os03g0834000(OsFEN-1b)	K04799
Metabolism	Amino acid metabolism	Valine, leucine and isoleucine biosynthesis	3	24	0.970997	1	ko00290	Os01g0652600(-);Os03g0231600(-);MSTRG.684(Os05g0573700)	K00053+K00826+K00053
Metabolism	Lipid metabolism	Cutin, suberine and wax biosynthesis	5	35	0.972237	1	ko00073	Os02g0621300(OsCER1);Os02g0734600(-);Os10g0486100(-);Os08g0557800(-);Os04g0511200(EFA27)	K15404+K17991+K15402+K13356+K17991
Metabolism	Metabolism of terpenoids and polyketides	Zeatin biosynthesis	6	42	0.980522	1	ko00908	Os10g0483500(OsCKX3);Os02g0206400(-);Os01g0940000(CKX4);Os04g0556400(-);Os01g0968700(OsIPT9);Os02g0206100(-)	K00279+K13496+K00279+K13495+K00791+K13496
Genetic Information Processing	Translation	RNA transport	40	197	0.981319	1	ko03013	Os01g0620100(OsWD40-19);Os08g0427900(-);Os02g0767100(-);Os05g0472300(-);Os03g0347200(-);Os08g0176800(OsWD40-156);Os03g0858100(-);Os07g0613300(-);Os12g0131300(-);Os10g0536000(OsSce1);Os02g0741500(-);Os07g0685400(-);Os06g0338900(-);Os11g0132700(-);Os12g0503200(-);Os01g0918200(-);Os07g0529800(GOS2);Os07g0167000(eIF-3e);Os01g0794500(-);Os04g0440100(UPF3);Os11g0677500(-);Os02g0273800(-);Os02g0205400(O…	K14299+K12881+K13174+K03538+K12882+K14298+K14290+K14288+K14320+K10577+K09291+K14317+K03241+K14320+K03243+K12160+K03113+K03250+K03113+K14328+K01164+K18213+K13137+K00784+K03539+K03539+K14320+K00784+K03259+K12880+K14295+K18213+K09291+K03260+K14326+K14289+K03113+K05749+K14289+K09291
Metabolism	Carbohydrate metabolism	Amino sugar and nucleotide sugar metabolism	35	176	0.982505	1	ko00520	Os05g0387200(-);Os02g0791500(OsUGlcAE3);Os05g0247100(DIP3);Os11g0700900(C10923);Os03g0115100(-);Os12g0128700(-);Os10g0363100(-);Os03g0320100(-);Os06g0256500(Pgi2(Pgib));Os06g0726200(Cht1*(Chi1));Os04g0636100(-);Os08g0478800(-);Os04g0618200(-);Os11g0132600(OsWD40-181);Os06g0356800(-);Os11g0131900(OsARAF3);Os08g0327100(OsGAUT4);Os03g0776000(Pgi1(Pgia));Os09g0298200(OsAGPS1);Os05g0187100(HXK7);Os09g…	K06118+K08679+K01183+K01183+K05305+K01209+K13648+K01209+K01810+K20547+K13648+K01810+K12448+K01209+K01183+K01209+K13648+K01810+K00975+K00844+K01784+K12446+K12448+K00326+K13648+K01784+K00965+K01784+K00972+K00975+K08679+K08679+K08678+K01183+K02377
Organismal Systems	Environmental adaptation	Plant-pathogen interaction	62	292	0.983686	1	ko04626	Os03g0181500(ONI1);Os07g0186500(-);Os05g0223000(OsCML18);Os03g0758300(OsCNGC7);Os02g0595700(tufA);Os09g0392100(OsEDS1);Os03g0310800(-);Os07g0129300(OsPR1);Os07g0681400(OsCML24);Os08g0117400(OsCML7);Os01g0734200(rbohA);Os01g0135700(OsCML16);Os05g0474800(OsWRKY70);Os08g0453700(RbohF);Os05g0312600(OsCML21);Os05g0574600(OsCHS);Os07g0416100(-);Os08g0157000(OsMAPK2);Os03g0743500(OsCML4);Os04g0647800(-)…	K15397+K13457+K13448+K05391+K02358+K18875+K02183+K13449+K13448+K13448+K13447+K13448+K13424+K13447+K13448+K15397+K13424+K20600+K02183+K00864+K13413+K13449+K02183+K13448+K13429+K13448+K13448+K13448+K13459+K13449+K13412+K13414+K13437+K13447+K13449+K13457+K13457+K13414+K18835+K15397+K13448+K13457+K13448+K13412+K13456+K13429+K15397+K13449+K05391+K13457+K13436+K18835+K02183+K13427+K13448+K01373+K02183+…
Genetic Information Processing	Translation	Ribosome biogenesis in eukaryotes	16	99	0.994544	1	ko03008	Os12g0299700(-);Os01g0872700(OsXrn3);Os05g0472300(-);Os07g0495100(CK2beta3);Os10g0564900(-);Os03g0858100(-);Os03g0762000(HD6);Os08g0107500(-);Os03g0352400(OsNug2);Os01g0888700(-);Os03g0151700(OsWD40-63);Os03g0207300(CK2alpha3);Os11g0677500(-);Os12g0175900(-);Os12g0101000(OsCCT39);Os12g0188900(-)	K14565+K12619+K03538+K03115+K03115+K14290+K03097+K14574+K14537+K07179+K14556+K03097+K01164+K03539+K03539+K14570
Genetic Information Processing	Replication and repair	Mismatch repair	7	55	0.995747	1	ko03430	Os01g0253600(OsRPA14);Os01g0846000(-);Os03g0855700(-);Os05g0274200(-);Os09g0551900(-);Os02g0776800(RPA1A);MSTRG.967(--)	K10740+K07466+K07466+K08735+K08739+K07466+K07466
Genetic Information Processing	Replication and repair	Homologous recombination	13	86	0.995815	1	ko03440	Os01g0253600(OsRPA14);Os11g0302700(RecA);Os01g0846000(-);Os06g0150100(-);Os06g0715600(-);Os03g0855700(-);Os07g0689950(-);Os04g0648700(EME1);Os05g0486600(BARD1);Os09g0500600(TOP3);Os02g0776800(RPA1A);Os01g0948100(OsMUS81);MSTRG.967(--)	K10740+K03553+K07466+K20776+K12173+K07466+K10728+K10882+K10683+K03165+K07466+K08991+K07466
Genetic Information Processing	Transcription	RNA polymerase	6	63	0.999784	1	ko03020	Os09g0110400(-);Os01g0889200(-);Os04g0394500(OsRPC53);Os01g0679000(-);MSTRG.18062(rpoB);MSTRG.18063(rpoC1)	K03011+K03026+K03026+K03023+K03043+K03046
Genetic Information Processing	Transcription	Spliceosome	35	216	0.999889	1	ko03040	Os05g0364600(-);Os08g0427900(-);Os07g0281000(OsC3H49);Os09g0407900(-);Os05g0178900(-);Os01g0316600(-);Os03g0347200(-);Os07g0508000(-);Os07g0633200(-);Os06g0566100(-);Os09g0491756(OsC3H60);Os08g0127700(-);Os07g0621500(-);Os10g0115600(U1-70K);Os06g0343100(-);Os02g0827300(-);Os02g0146400(-);Os02g0122800(-);Os06g0170500(OsC3H40);Os01g0840100(OsMed37_1);Os10g0486600(-);Os08g0159900(PRP5);Os05g0289400(…	K12890+K12881+K12872+K12847+K12850+K12890+K12882+K12815+K12900+K12741+K12836+K12819+K12818+K11093+K12818+K12829+K12828+K12893+K12872+K03283+K12859+K12811+K12869+K12897+K12844+K12839+K12900+K12828+K12880+K12820+K12818+K12844+K03283+K11984+K12813
Genetic Information Processing	Replication and repair	DNA replication	6	71	0.999967	1	ko03030	Os01g0253600(OsRPA14);Os01g0846000(-);Os03g0855700(-);Os03g0834000(OsFEN-1b);Os02g0776800(RPA1A);MSTRG.967(--)	K10740+K07466+K07466+K04799+K07466+K07466
Metabolism	Carbohydrate metabolism	Pentose and glucuronate interconversions	6	82	0.999998	1	ko00040	Os01g0847800(AKR3);Os12g0633000(-);Os01g0788400(OsPME6);Os07g0640200(-);Os08g0545200(OsDH1);Os07g0669100(OsXYLA1)	K00002+K00854+K01051+K00854+K00008+K01805
Metabolism	Biosynthesis of other secondary metabolites	Phenylpropanoid biosynthesis	37	266	1	1	ko00940	Os07g0677100(POX8.1);Os02g0627100(OsPAL1);Os07g0676900(prx109);Os10g0194200(OsCAD1);Os02g0187800(GH2);Os11g0182200(-);Os01g0327100(prx15);Os04g0500700(OsHCT1);Os03g0762300(-);Os08g0441500(OsCCR);Os01g0591300(OsALDH2C1);Os02g0626400(OsPAL);Os01g0930800(Os1bglu5);Os03g0762400(prx51);Os04g0688500(prx62);Os04g0518100(OsPAL02);Os04g0474900(OsTAGG1);Os07g0694300(prx116);Os05g0366600(Os5bglu22);Os02g062…	K00430+K10775+K00430+K00083+K00083+K13065+K00430+K13065+K00430+K09753+K12355+K10775+K01188+K00430+K00430+K13064+K01188+K00430+K01188+K10775+K00430+K01188+K05350+K00430+K05349+K01904+K01188+K05349+K00083+K09755+K01188+K01188+K23260+K13065+K00588+K00083+K05350
Genetic Information Processing	Replication and repair	Base excision repair	1	52	1	1	ko03410	Os03g0834000(OsFEN-1b)	K04799
Genetic Information Processing	Translation	Ribosome	35	359	1	1	ko03010	Os12g0135900(-);Os02g0137200(-);Os01g0678600(-);Os03g0843400(-);Os05g0101400(-);Os03g0452300(-);Os02g0652600(-);Os03g0704000(-);Os03g0725000(OsRpl6-1);Os05g0513500(-);Os02g0822600(-);Os03g0815400(-);Os01g0749200(WLP1);Os01g0805000(-);Os03g0168900(-);Os01g0633000(-);Os03g0265400(-);Os06g0683200(-);Os01g0589000(-);Os12g0616200(HLL);Os03g0315800(-);gene-rps2(-);gene-rpl22(-);gene-rps15-2(-);gene-rps…	K02895+K02906+K02968+K02990+K02902+K02988+K02884+K02952+K02933+K02913+K02939+K02879+K02871+K02914+K02911+K02909+K02926+K02895+K02945+K02874+K02945+K02967+K02890+K02956+K02956+K02965+K02886+K02874+K02954+K02886+K02992+K02965+K02886+K02890+K02967
