# Supplementary material for: Whole-Transcriptome Analysis Reveals Autophagy Is Involved in Early Senescence of zj-es Mutant Rice
Source: Front Plant Sci. 2022 Jun 3;13:899054. doi: 10.3389/fpls.2022.899054 (PMC9204060; doi:10.3389/fpls.2022.899054)
Supplement: Supplementary file 8 [file Table_6.XLSX]

## Sheet: Sheet1
gene_id	TF_family
Os01g0852650	FAR1
Os02g0202800	FAR1
Os02g0284500	FAR1
Os02g0542200	FAR1
Os02g0550900	FAR1
Os02g0608100	FAR1
Os02g0608300	FAR1
Os03g0164400	FAR1
Os03g0181600	FAR1
Os03g0255000	FAR1
Os03g0255400	FAR1
Os03g0655600	FAR1
Os03g0777700	FAR1
Os03g0843700	FAR1
Os04g0354200	FAR1
Os04g0421700	FAR1
Os04g0443000	FAR1
Os04g0476500	FAR1
Os04g0598300	LFY
Os04g0615900	FAR1
Os06g0166100	FAR1
Os06g0597800	FAR1
Os07g0496300	FAR1
Os07g0563600	FAR1
Os07g0615900	FAR1
Os10g0571900	FAR1
Os11g0244900	FAR1
Os11g0681300	FAR1
Os12g0160900	FAR1
Os12g0225300	FAR1
