# Supplementary material for: Whole-Transcriptome Analysis Reveals Autophagy Is Involved in Early Senescence of zj-es Mutant Rice
Source: Front Plant Sci. 2022 Jun 3;13:899054. doi: 10.3389/fpls.2022.899054 (PMC9204060; doi:10.3389/fpls.2022.899054)
Supplement: Supplementary file 9 [file Table_7.XLSX]

## Sheet: mRNA-lncRNA
lncRNA_Index	lncRNA_ID	mRNA_ID	Symbol	Description	KEGG_A_class	KEGG_B_class	Pathway	K_ID	GO Component	GO Function	GO Process
1	MSTRG.6.1	Os01g0100100	-	RabGAP/TBC domain containing protein	-	-	-	-	GO:0005623//cell	GO:0005096//GTPase activator activity;GO:0017137//Rab GTPase binding	GO:0006886//intracellular protein transport;GO:0090630//activation of GTPase activity
1	MSTRG.6.1	Os01g0100200	-	Conserved hypothetical protein	-	-	-	-	-	-	-
1	MSTRG.6.1	Os01g0100300	-	Cytochrome P450 domain containing protein	-	-	-	-	-	GO:0004497//monooxygenase activity;GO:0005506//iron ion binding;GO:0016705//oxidoreductase activity, acting on paired donors, with incorporation or reduction of molecular oxygen;GO:0020037//heme binding	GO:0055114//oxidation-reduction process
1	MSTRG.6.1	Os01g0100466	-	Hypothetical protein	-	-	-	-	-	-	-
1	MSTRG.6.1	Os01g0100500	-	Immunoglobulin-like domain containing protein	-	-	-	-	GO:0016020//membrane;GO:0016021//integral component of membrane	-	-
1	MSTRG.6.1	Os01g0100600	-	Single-stranded nucleic acid binding R3H domain containing protein	-	-	-	-	-	GO:0003676//nucleic acid binding	-
2	MSTRG.26.1	Os01g0102300	OsTLP27	Thylakoid lumen protein, Photosynthesis and chloroplast developmen	-	-	-	-	GO:0009543//chloroplast thylakoid lumen	-	-
2	MSTRG.26.1	Os01g0102400	OsHAP5H	Histone-fold domain containing protein	-	-	-	-	GO:0000786//nucleosome;GO:0005634//nucleus;GO:0005737//cytoplasm	GO:0000978//RNA polymerase II core promoter proximal region sequence-specific DNA binding;GO:0003677//DNA binding;GO:0046982//protein heterodimerization activity	GO:0006355//regulation of transcription, DNA-templated
2	MSTRG.26.1	Os01g0102500	-	Conserved hypothetical protein	-	-	-	-	-	-	-
2	MSTRG.26.1	Os01g0102700	-	Translocon-associated beta family protein	Genetic Information Processing	Folding, sorting and degradation	ko04141//Protein processing in endoplasmic reticulum	K13250	GO:0005783//endoplasmic reticulum	-	-
2	MSTRG.26.1	Os01g0102800	CSB	Similar to chromatin remodeling complex subunit	Genetic Information Processing	Replication and repair	ko03420//Nucleotide excision repair	K10841	-	GO:0005524//ATP binding	-
2	MSTRG.26.1	Os01g0102600	OsSK4	Shikimate kinase domain containing protein	-	-	-	-	GO:0009507//chloroplast;GO:0009570//chloroplast stroma	GO:0004765//shikimate kinase activity	GO:0009658//chloroplast organization;GO:0010027//thylakoid membrane organization;GO:0016310//phosphorylation
3	MSTRG.36.1	Os01g0103050	-	Non-protein coding transcript	-	-	-	-	-	-	-
3	MSTRG.36.1	Os01g0103400	-	Hypothetical gene	-	-	-	-	-	-	-
3	MSTRG.36.1	Os01g0103600	-	Similar to sterol-8,7-isomerase	Metabolism;Metabolism;Metabolism	Global and overview maps;Global and overview maps;Lipid metabolism	ko01100//Metabolic pathways;ko01110//Biosynthesis of secondary metabolites;ko00100//Steroid biosynthesis	K01824;K01824;K01824	GO:0005783//endoplasmic reticulum;GO:0005789//endoplasmic reticulum membrane;GO:0005886//plasma membrane;GO:0016020//membrane;GO:0016021//integral component of membrane	GO:0000247//C-8 sterol isomerase activity;GO:0004769//steroid delta-isomerase activity;GO:0016853//isomerase activity;GO:0047750//cholestenol delta-isomerase activity	GO:0006629//lipid metabolic process;GO:0006694//steroid biosynthetic process;GO:0008202//steroid metabolic process;GO:0016125//sterol metabolic process;GO:0016126//sterol biosynthetic process
3	MSTRG.36.1	Os01g0103650	-	Hypothetical gene	-	-	-	-	-	-	-
3	MSTRG.36.1	Os01g0103700	-	Conserved hypothetical protein	-	-	-	-	GO:0032039//integrator complex	-	GO:0016180//snRNA processing;GO:0034472//snRNA 3'-end processing
3	MSTRG.36.1	Os01g0103100	-	TGF-beta receptor, type I/II extracellular region family protein	-	-	-	-	GO:0016020//membrane;GO:0016021//integral component of membrane	GO:0015333//peptide:proton symporter activity;GO:0022857//transmembrane transporter activity;GO:0035673//oligopeptide transmembrane transporter activity;GO:1904680//peptide transmembrane transporter activity	GO:0006857//oligopeptide transport;GO:0035672//oligopeptide transmembrane transport;GO:0055085//transmembrane transport;GO:1902600//hydrogen ion transmembrane transport
3	MSTRG.36.1	Os01g0103075	-	Hypothetical protein	-	-	-	-	-	-	-
4	MSTRG.42.2	Os01g0103700	-	Conserved hypothetical protein	-	-	-	-	GO:0032039//integrator complex	-	GO:0016180//snRNA processing;GO:0034472//snRNA 3'-end processing
4	MSTRG.42.2	Os01g0103800	OsDW1-01g	Conserved hypothetical protein	-	-	-	-	-	-	-
4	MSTRG.42.2	Os01g0104000	-	C-type lectin domain containing protein	-	-	-	-	GO:0005886//plasma membrane;GO:0016021//integral component of membrane	GO:0004672//protein kinase activity;GO:0004675//transmembrane receptor protein serine/threonine kinase activity;GO:0004713//protein tyrosine kinase activity;GO:0005524//ATP binding	GO:0006468//protein phosphorylation;GO:0007178//transmembrane receptor protein serine/threonine kinase signaling pathway;GO:0018108//peptidyl-tyrosine phosphorylation
4	MSTRG.42.2	Os01g0104100	OsCOIN	Similar to protein binding / zinc ion binding	-	-	-	-	-	GO:0005515//protein binding	-
5	MSTRG.49.1	Os01g0104600	OsDET1	Homolog of Arabidopsis DE-ETIOLATED1 (DET1), Modulation of the ABA signaling pathway and ABA biosynthesis, Regulation of chlorophyll conten	Genetic Information Processing	Folding, sorting and degradation	ko04120//Ubiquitin mediated proteolysis	K10571	GO:0005634//nucleus	-	GO:0006281//DNA repair
5	MSTRG.49.1	Os01g0104900	-	Transferase family protein	-	-	-	-	-	GO:0016747//transferase activity, transferring acyl groups other than amino-acyl groups	-
6	MSTRG.56.1	Os01g0105700	OsbHLH071	Basic helix-loop-helix dimerisation region bHLH domain containing protein	-	-	-	-	GO:0005634//nucleus	GO:0001228//transcriptional activator activity, RNA polymerase II transcription regulatory region sequence-specific binding;GO:0046983//protein dimerization activity	GO:0045944//positive regulation of transcription from RNA polymerase II promoter
6	MSTRG.56.1	Os01g0105800	OsISC9	Similar to Iron sulfur assembly protein 1	-	-	-	-	GO:0005739//mitochondrion	GO:0005198//structural molecule activity;GO:0051536//iron-sulfur cluster binding;GO:0051537//2 iron, 2 sulfur cluster binding	GO:0016226//iron-sulfur cluster assembly;GO:0097428//protein maturation by iron-sulfur cluster transfer
6	MSTRG.56.1	Os01g0106200	-	Similar to RER1A protein (AtRER1A)	-	-	-	-	GO:0005783//endoplasmic reticulum;GO:0016020//membrane;GO:0016021//integral component of membrane;GO:0030173//integral component of Golgi membrane	-	GO:0006621//protein retention in ER lumen;GO:0006890//retrograde vesicle-mediated transport, Golgi to ER
6	MSTRG.56.1	Os01g0106300	-	Similar to Isoflavone reductase homolog IRL (EC 1.3.1.-)	-	-	-	-	-	-	-
6	MSTRG.56.1	Os01g0105900	-	Carbohydrate/purine kinase domain containing protein	-	-	-	-	-	GO:0016301//kinase activity	-
7	MSTRG.66.1	Os01g0107400	-	Conserved hypothetical protein	-	-	-	-	-	-	-
8	MSTRG.96.1	Os01g0112300	-	Hypothetical conserved gene	-	-	-	-	-	-	-
8	MSTRG.96.1	Os01g0112400	OsNIP4	Major intrinsic protein family protein	-	-	-	-	GO:0016020//membrane;GO:0016021//integral component of membrane	GO:0015267//channel activity	GO:0055085//transmembrane transport
9	MSTRG.102.1	Os01g0113300	OsRLCK3	Similar to ARK protein (Fragment)	-	-	-	-	GO:0016020//membrane;GO:0016021//integral component of membrane	GO:0004672//protein kinase activity;GO:0005524//ATP binding;GO:0030247//polysaccharide binding	GO:0006468//protein phosphorylation
9	MSTRG.102.1	Os01g0113325	-	Hypothetical protein	-	-	-	-	-	-	-
9	MSTRG.102.1	Os01g0113350	-	Hypothetical conserved gene	-	-	-	-	GO:0005886//plasma membrane;GO:0016021//integral component of membrane	GO:0004672//protein kinase activity;GO:0004674//protein serine/threonine kinase activity;GO:0005524//ATP binding;GO:0031625//ubiquitin protein ligase binding	GO:0006468//protein phosphorylation
9	MSTRG.102.1	Os01g0113450	-	Hypothetical protein	-	-	-	-	-	-	-
9	MSTRG.102.1	Os01g0113600	-	Hypothetical protein	-	-	-	-	-	-	-
9	MSTRG.102.1	Os01g0113650	-	Hypothetical conserved gene	-	-	-	-	GO:0005886//plasma membrane;GO:0016021//integral component of membrane	GO:0004672//protein kinase activity;GO:0004674//protein serine/threonine kinase activity;GO:0005524//ATP binding;GO:0031625//ubiquitin protein ligase binding	GO:0006468//protein phosphorylation
9	MSTRG.102.1	Os01g0113700	-	Similar to Receptor-like kinase	-	-	-	-	GO:0016020//membrane;GO:0016021//integral component of membrane	GO:0004672//protein kinase activity;GO:0005524//ATP binding	GO:0006468//protein phosphorylation
9	MSTRG.102.1	Os01g0113750	-	Non-protein coding transcript	-	-	-	-	-	-	-
10	MSTRG.108.1	Os01g0113600	-	Hypothetical protein	-	-	-	-	-	-	-
10	MSTRG.108.1	Os01g0113650	-	Hypothetical conserved gene	-	-	-	-	GO:0005886//plasma membrane;GO:0016021//integral component of membrane	GO:0004672//protein kinase activity;GO:0004674//protein serine/threonine kinase activity;GO:0005524//ATP binding;GO:0031625//ubiquitin protein ligase binding	GO:0006468//protein phosphorylation
10	MSTRG.108.1	Os01g0113700	-	Similar to Receptor-like kinase	-	-	-	-	GO:0016020//membrane;GO:0016021//integral component of membrane	GO:0004672//protein kinase activity;GO:0005524//ATP binding	GO:0006468//protein phosphorylation
10	MSTRG.108.1	Os01g0113750	-	Non-protein coding transcript	-	-	-	-	-	-	-
10	MSTRG.108.1	Os01g0114000	-	Similar to H0315A08.1 protein	-	-	-	-	-	-	-
10	MSTRG.108.1	Os01g0113400	OsRLCK4	Similar to Receptor-like kinase	-	-	-	-	-	GO:0000166//nucleotide binding;GO:0004672//protein kinase activity;GO:0004674//protein serine/threonine kinase activity;GO:0005524//ATP binding	GO:0006468//protein phosphorylation
10	MSTRG.108.1	Os01g0113900	-	Similar to Receptor-like protein kinase	-	-	-	-	-	GO:0016301//kinase activity	-
10	MSTRG.108.1	Os01g0113950	-	Hypothetical protein	-	-	-	-	-	-	-
11	MSTRG.116.1	Os01g0114100	OsRLCK5	Similar to Protein kinase RLK17	-	-	-	-	-	GO:0004672//protein kinase activity;GO:0005524//ATP binding;GO:0030247//polysaccharide binding	GO:0006468//protein phosphorylation
11	MSTRG.116.1	Os01g0114150	-	Non-protein coding transcript	-	-	-	-	-	-	-
11	MSTRG.116.1	Os01g0114400	OsRLCK7	Similar to Receptor-like kinase	-	-	-	-	-	GO:0004672//protein kinase activity;GO:0005524//ATP binding	GO:0006468//protein phosphorylation
11	MSTRG.116.1	Os01g0114402	-	Hypothetical protein	-	-	-	-	-	-	-
12	MSTRG.117.1	Os01g0114100	OsRLCK5	Similar to Protein kinase RLK17	-	-	-	-	-	GO:0004672//protein kinase activity;GO:0005524//ATP binding;GO:0030247//polysaccharide binding	GO:0006468//protein phosphorylation
12	MSTRG.117.1	Os01g0114150	-	Non-protein coding transcript	-	-	-	-	-	-	-
12	MSTRG.117.1	Os01g0114400	OsRLCK7	Similar to Receptor-like kinase	-	-	-	-	-	GO:0004672//protein kinase activity;GO:0005524//ATP binding	GO:0006468//protein phosphorylation
12	MSTRG.117.1	Os01g0114402	-	Hypothetical protein	-	-	-	-	-	-	-
12	MSTRG.117.1	Os01g0114550	-	Non-protein coding transcript	-	-	-	-	-	-	-
13	MSTRG.114.2	Os01g0114100	OsRLCK5	Similar to Protein kinase RLK17	-	-	-	-	-	GO:0004672//protein kinase activity;GO:0005524//ATP binding;GO:0030247//polysaccharide binding	GO:0006468//protein phosphorylation
13	MSTRG.114.2	Os01g0114150	-	Non-protein coding transcript	-	-	-	-	-	-	-
13	MSTRG.114.2	Os01g0114400	OsRLCK7	Similar to Receptor-like kinase	-	-	-	-	-	GO:0004672//protein kinase activity;GO:0005524//ATP binding	GO:0006468//protein phosphorylation
13	MSTRG.114.2	Os01g0114402	-	Hypothetical protein	-	-	-	-	-	-	-
13	MSTRG.114.2	Os01g0114550	-	Non-protein coding transcript	-	-	-	-	-	-	-
14	MSTRG.129.5	Os01g0114800	-	Similar to H0215A08.3 protein	-	-	-	-	-	-	-
14	MSTRG.129.5	Os01g0114900	OsRLCK9	Similar to LRK14	-	-	-	-	-	GO:0004672//protein kinase activity;GO:0005524//ATP binding	GO:0006468//protein phosphorylation
14	MSTRG.129.5	MSTRG.128	--	PREDICTED: DNA-3-methyladenine glycosylase 1-like [Oryza brachyantha]	Genetic Information Processing	Replication and repair	ko03410//Base excision repair	K01247	-	-	-
14	MSTRG.129.5	Os01g0115300	-	Hypothetical gene	-	-	-	-	-	-	-
14	MSTRG.129.5	Os01g0115200	-	Similar to OSIGBa0140C02.7 protein	Metabolism;Metabolism;Metabolism;Metabolism	Global and overview maps;Amino acid metabolism;Amino acid metabolism;Amino acid metabolism	ko01100//Metabolic pathways;ko00380//Tryptophan metabolism;ko00330//Arginine and proline metabolism;ko00360//Phenylalanine metabolism	K01426;K01426;K01426;K01426	-	-	-
15	MSTRG.135.1	Os01g0115533	-	Non-protein coding transcript	-	-	-	-	-	-	-
15	MSTRG.135.1	Os01g0115566	OsRLCK10	Similar to Receptor-like kinase	-	-	-	-	-	-	-
15	MSTRG.135.1	Os01g0115600	OsRLCK11	Similar to LRK14	-	-	-	-	-	GO:0004672//protein kinase activity;GO:0005524//ATP binding;GO:0030247//polysaccharide binding	GO:0006468//protein phosphorylation
15	MSTRG.135.1	Os01g0115700	-	Similar to Receptor-like kinase	-	-	-	-	GO:0016020//membrane;GO:0016021//integral component of membrane	GO:0004672//protein kinase activity;GO:0005524//ATP binding	GO:0006468//protein phosphorylation
15	MSTRG.135.1	Os01g0115725	-	Hypothetical protein	-	-	-	-	-	-	-
15	MSTRG.135.1	MSTRG.138	--	hypothetical protein DAI22_01g009908 [Oryza sativa Japonica Group]	-	-	-	-	-	-	-
15	MSTRG.135.1	Os01g0115750	Os8Tak2	Similar to Receptor-like protein kinase	-	-	-	-	GO:0016020//membrane;GO:0016021//integral component of membrane	GO:0004672//protein kinase activity;GO:0005524//ATP binding	GO:0006468//protein phosphorylation
15	MSTRG.135.1	Os01g0115752	-	Non-protein coding transcript	-	-	-	-	-	-	-
16	MSTRG.148.1	Os01g0116200	OsRLCK13	Protein kinase, core domain containing protein	-	-	-	-	-	GO:0004672//protein kinase activity;GO:0005524//ATP binding	GO:0006468//protein phosphorylation
16	MSTRG.148.1	Os01g0116250	-	Hypothetical protein	-	-	-	-	-	-	-
16	MSTRG.148.1	Os01g0116400	-	Protein kinase, core domain containing protein	-	-	-	-	GO:0016020//membrane;GO:0016021//integral component of membrane	GO:0004672//protein kinase activity;GO:0005524//ATP binding	GO:0006468//protein phosphorylation
16	MSTRG.148.1	Os01g0116650	-	Hypothetical protein	-	-	-	-	-	-	-
16	MSTRG.148.1	Os01g0116900	-	Protein kinase, catalytic domain domain containing protein	-	-	-	-	GO:0016020//membrane;GO:0016021//integral component of membrane	GO:0004672//protein kinase activity;GO:0005524//ATP binding	GO:0006468//protein phosphorylation
17	MSTRG.149.1	Os01g0116200	OsRLCK13	Protein kinase, core domain containing protein	-	-	-	-	-	GO:0004672//protein kinase activity;GO:0005524//ATP binding	GO:0006468//protein phosphorylation
17	MSTRG.149.1	Os01g0116250	-	Hypothetical protein	-	-	-	-	-	-	-
17	MSTRG.149.1	Os01g0116400	-	Protein kinase, core domain containing protein	-	-	-	-	GO:0016020//membrane;GO:0016021//integral component of membrane	GO:0004672//protein kinase activity;GO:0005524//ATP binding	GO:0006468//protein phosphorylation
17	MSTRG.149.1	Os01g0116650	-	Hypothetical protein	-	-	-	-	-	-	-
17	MSTRG.149.1	Os01g0116900	-	Protein kinase, catalytic domain domain containing protein	-	-	-	-	GO:0016020//membrane;GO:0016021//integral component of membrane	GO:0004672//protein kinase activity;GO:0005524//ATP binding	GO:0006468//protein phosphorylation
17	MSTRG.149.1	Os01g0116300	OsRLCK14	Similar to Receptor-like kinase	-	-	-	-	-	-	-
18	MSTRG.153.2	Os01g0116400	-	Protein kinase, core domain containing protein	-	-	-	-	GO:0016020//membrane;GO:0016021//integral component of membrane	GO:0004672//protein kinase activity;GO:0005524//ATP binding	GO:0006468//protein phosphorylation
18	MSTRG.153.2	Os01g0116650	-	Hypothetical protein	-	-	-	-	-	-	-
18	MSTRG.153.2	Os01g0116800	-	Similar to Receptor-like kinase	-	-	-	-	-	GO:0000166//nucleotide binding;GO:0004672//protein kinase activity;GO:0004674//protein serine/threonine kinase activity;GO:0005524//ATP binding	GO:0006468//protein phosphorylation
18	MSTRG.153.2	Os01g0116901	-	Hypothetical protein	-	-	-	-	-	-	-
18	MSTRG.153.2	Os01g0116600	SPL33	Eukaryotic translation elongation factor 1 alpha (eEF1A)-like protein, Negative regulation of cell death, Defense respons	Genetic Information Processing	Translation	ko03015//mRNA surveillance pathway	K14416	-	GO:0003746//translation elongation factor activity;GO:0003924//GTPase activity;GO:0005525//GTP binding;GO:0046872//metal ion binding	-
18	MSTRG.153.2	Os01g0116300	OsRLCK14	Similar to Receptor-like kinase	-	-	-	-	-	-	-
19	MSTRG.156.1	Os01g0116800	-	Similar to Receptor-like kinase	-	-	-	-	-	GO:0000166//nucleotide binding;GO:0004672//protein kinase activity;GO:0004674//protein serine/threonine kinase activity;GO:0005524//ATP binding	GO:0006468//protein phosphorylation
19	MSTRG.156.1	Os01g0116901	-	Hypothetical protein	-	-	-	-	-	-	-
19	MSTRG.156.1	Os01g0116600	SPL33	Eukaryotic translation elongation factor 1 alpha (eEF1A)-like protein, Negative regulation of cell death, Defense respons	Genetic Information Processing	Translation	ko03015//mRNA surveillance pathway	K14416	-	GO:0003746//translation elongation factor activity;GO:0003924//GTPase activity;GO:0005525//GTP binding;GO:0046872//metal ion binding	-
20	MSTRG.169.1	Os01g0117900	OsUMAMIT1	Similar to nodulin-like protein	-	-	-	-	GO:0005886//plasma membrane;GO:0016020//membrane;GO:0016021//integral component of membrane	GO:0022857//transmembrane transporter activity	GO:0055085//transmembrane transport
20	MSTRG.169.1	Os01g0118000	-	Similar to Fructose-bisphosphate aldolase (EC 4.1.2.13) (Fragment)	Metabolism;Metabolism;Metabolism;Metabolism;Metabolism;Metabolism;Metabolism;Metabolism	Global and overview maps;Global and overview maps;Global and overview maps;Global and overview maps;Carbohydrate metabolism;Energy metabolism;Carbohydrate metabolism;Carbohydrate metabolism	ko01100//Metabolic pathways;ko01110//Biosynthesis of secondary metabolites;ko01200//Carbon metabolism;ko01230//Biosynthesis of amino acids;ko00010//Glycolysis / Gluconeogenesis;ko00710//Carbon fixation in photosynthetic organisms;ko00051//Fructose and mannose metabolism;ko00030//Pentose phosphate pathway	K01623;K01623;K01623;K01623;K01623;K01623;K01623;K01623	GO:0005739//mitochondrion;GO:0005829//cytosol;GO:0009534//chloroplast thylakoid;GO:0010287//plastoglobule	GO:0003824//catalytic activity;GO:0004332//fructose-bisphosphate aldolase activity;GO:0016829//lyase activity	GO:0006096//glycolytic process;GO:0006979//response to oxidative stress;GO:0030388//fructose 1,6-bisphosphate metabolic process;GO:0046686//response to cadmium ion
20	MSTRG.169.1	Os01g0118033	-	Non-protein coding transcript	-	-	-	-	-	-	-
20	MSTRG.169.1	Os01g0117700	-	Similar to LRK14	-	-	-	-	GO:0016020//membrane;GO:0016021//integral component of membrane	GO:0004672//protein kinase activity;GO:0005524//ATP binding	GO:0006468//protein phosphorylation
21	MSTRG.193.4	Os01g0121900	-	Seven-in-absentia protein, sina domain containing protein	Genetic Information Processing	Folding, sorting and degradation	ko04120//Ubiquitin mediated proteolysis	K04506	GO:0005634//nucleus;GO:0005737//cytoplasm	GO:0005515//protein binding;GO:0008270//zinc ion binding;GO:0046872//metal ion binding;GO:0061630//ubiquitin protein ligase activity	GO:0006511//ubiquitin-dependent protein catabolic process;GO:0007275//multicellular organism development;GO:0016567//protein ubiquitination
21	MSTRG.193.4	Os01g0121950	-	Hypothetical conserved gene	Genetic Information Processing	Folding, sorting and degradation	ko04120//Ubiquitin mediated proteolysis	K04506	GO:0005634//nucleus;GO:0005737//cytoplasm	GO:0005515//protein binding;GO:0008270//zinc ion binding;GO:0046872//metal ion binding;GO:0061630//ubiquitin protein ligase activity	GO:0006511//ubiquitin-dependent protein catabolic process;GO:0007275//multicellular organism development;GO:0016567//protein ubiquitination
21	MSTRG.193.4	Os01g0121700	-	ABC transporter-like domain containing protein	-	-	-	-	GO:0005886//plasma membrane;GO:0016020//membrane;GO:0016021//integral component of membrane	GO:0000166//nucleotide binding;GO:0005524//ATP binding;GO:0016887//ATPase activity;GO:0042626//ATPase activity, coupled to transmembrane movement of substances	GO:0055085//transmembrane transport
22	MSTRG.202.1	Os01g0125550	-	Conserved hypothetical protein	-	-	-	-	-	-	-
22	MSTRG.202.1	Os01g0125600	-	Heavy metal transport/detoxification protein domain containing protein	-	-	-	-	-	GO:0046872//metal ion binding	GO:0030001//metal ion transport
22	MSTRG.202.1	Os01g0125700	-	Conserved hypothetical protein	-	-	-	-	-	-	-
22	MSTRG.202.1	Os01g0125800	AIP1	Actin-interacting, WD40-repeat protein, Actin turnove	-	-	-	-	GO:0030864//cortical actin cytoskeleton;GO:0042643//actomyosin, actin portion	GO:0005515//protein binding;GO:0051015//actin filament binding	GO:0030042//actin filament depolymerization;GO:0030836//positive regulation of actin filament depolymerization
22	MSTRG.202.1	Os01g0125850	-	Hypothetical protein	-	-	-	-	-	-	-
23	MSTRG.214.1	Os01g0126000	-	Hypothetical gene	-	-	-	-	-	-	-
23	MSTRG.214.1	Os01g0126100	OsLPR1	Multicopper oxidas	-	-	-	-	GO:0005783//endoplasmic reticulum;GO:0005789//endoplasmic reticulum membrane;GO:0016020//membrane	GO:0005507//copper ion binding;GO:0016491//oxidoreductase activity;GO:0016722//oxidoreductase activity, oxidizing metal ions;GO:0046872//metal ion binding	GO:0055114//oxidation-reduction process
23	MSTRG.214.1	Os01g0126401	-	Hypothetical gene	-	-	-	-	-	-	-
23	MSTRG.214.1	Os01g0126600	OsFDML2	Paralog of FACTOR OF DNA METHYLATION LIKE	-	-	-	-	-	-	GO:0031047//gene silencing by RNA
24	MSTRG.227.2	Os01g0128100	-	Similar to Bifunctional nuclease (Fragment)	-	-	-	-	-	GO:0000014//single-stranded DNA endodeoxyribonuclease activity;GO:0003676//nucleic acid binding;GO:0004519//endonuclease activity;GO:0004521//endoribonuclease activity;GO:0008309//double-stranded DNA exodeoxyribonuclease activity;GO:0016788//hydrolase activity, acting on ester bonds;GO:0043765//T/G mismatch-specific endonuclease activity	GO:0006308//DNA catabolic process;GO:0090502//RNA phosphodiester bond hydrolysis, endonucleolytic
24	MSTRG.227.2	Os01g0128200	-	Similar to Nuclease I	-	-	-	-	-	GO:0003676//nucleic acid binding;GO:0004519//endonuclease activity;GO:0016788//hydrolase activity, acting on ester bonds	GO:0006308//DNA catabolic process;GO:0090305//nucleic acid phosphodiester bond hydrolysis
24	MSTRG.227.2	Os01g0128250	-	Hypothetical gene	-	-	-	-	-	-	-
24	MSTRG.227.2	Os01g0128400	-	Protein of unknown function DUF2359, TMEM214 domain containing protein	-	-	-	-	GO:0005634//nucleus;GO:0005774//vacuolar membrane;GO:0005783//endoplasmic reticulum;GO:0005794//Golgi apparatus;GO:0005886//plasma membrane;GO:0009506//plasmodesma	-	-
25	MSTRG.230.1	Os01g0128800	OsNTMC2T3	Similar to plant synaptotagmin	-	-	-	-	GO:0016020//membrane;GO:0016021//integral component of membrane	GO:0008289//lipid binding	GO:0006869//lipid transport
26	MSTRG.236.1	Os01g0129800	-	Conserved hypothetical protein	-	-	-	-	-	-	-
26	MSTRG.236.1	Os01g0130000	OsMTP9	Cation efflux protein family protein	-	-	-	-	GO:0005623//cell;GO:0005773//vacuole;GO:0005774//vacuolar membrane;GO:0005886//plasma membrane;GO:0016020//membrane;GO:0016021//integral component of membrane	GO:0008324//cation transmembrane transporter activity;GO:0015086//cadmium ion transmembrane transporter activity;GO:0015093//ferrous iron transmembrane transporter activity;GO:0015341//zinc efflux active transmembrane transporter activity	GO:0006811//ion transport;GO:0006812//cation transport;GO:0006876//cellular cadmium ion homeostasis;GO:0006879//cellular iron ion homeostasis;GO:0006882//cellular zinc ion homeostasis;GO:0034755//iron ion transmembrane transport;GO:0055085//transmembrane transport;GO:0070574//cadmium ion transmembrane transport;GO:0071577//zinc II ion transmembrane transport;GO:0098655//cation transmembrane trans…
26	MSTRG.236.1	Os01g0130100	-	Hypothetical gene	-	-	-	-	-	-	-
26	MSTRG.236.1	Os01g0130200	-	Hypothetical conserved gene	-	-	-	-	GO:0005634//nucleus	GO:0005515//protein binding	GO:0006952//defense response;GO:0010112//regulation of systemic acquired resistance;GO:0042742//defense response to bacterium
27	MSTRG.237.1	Os01g0130000	OsMTP9	Cation efflux protein family protein	-	-	-	-	GO:0005623//cell;GO:0005773//vacuole;GO:0005774//vacuolar membrane;GO:0005886//plasma membrane;GO:0016020//membrane;GO:0016021//integral component of membrane	GO:0008324//cation transmembrane transporter activity;GO:0015086//cadmium ion transmembrane transporter activity;GO:0015093//ferrous iron transmembrane transporter activity;GO:0015341//zinc efflux active transmembrane transporter activity	GO:0006811//ion transport;GO:0006812//cation transport;GO:0006876//cellular cadmium ion homeostasis;GO:0006879//cellular iron ion homeostasis;GO:0006882//cellular zinc ion homeostasis;GO:0034755//iron ion transmembrane transport;GO:0055085//transmembrane transport;GO:0070574//cadmium ion transmembrane transport;GO:0071577//zinc II ion transmembrane transport;GO:0098655//cation transmembrane trans…
27	MSTRG.237.1	Os01g0130100	-	Hypothetical gene	-	-	-	-	-	-	-
27	MSTRG.237.1	Os01g0130200	-	Hypothetical conserved gene	-	-	-	-	GO:0005634//nucleus	GO:0005515//protein binding	GO:0006952//defense response;GO:0010112//regulation of systemic acquired resistance;GO:0042742//defense response to bacterium
28	MSTRG.246.1	Os01g0131600	OsAP2	Hypothetical conserved gene	-	-	-	-	GO:0005634//nucleus;GO:0016021//integral component of membrane	GO:0003677//DNA binding;GO:0003700//transcription factor activity, sequence-specific DNA binding	GO:0006355//regulation of transcription, DNA-templated
28	MSTRG.246.1	Os01g0131450	-	Hypothetical protein	-	-	-	-	-	-	-
28	MSTRG.246.1	Os01g0131800	-	Signal peptidase 22 kDa subunit family protein	Genetic Information Processing	Folding, sorting and degradation	ko03060//Protein export	K12948	GO:0005783//endoplasmic reticulum;GO:0005787//signal peptidase complex;GO:0005789//endoplasmic reticulum membrane;GO:0016020//membrane;GO:0016021//integral component of membrane;GO:0031090//organelle membrane;GO:0043231//intracellular membrane-bounded organelle	GO:0008233//peptidase activity;GO:0016787//hydrolase activity	GO:0006465//signal peptide processing;GO:0006508//proteolysis;GO:0045047//protein targeting to ER
28	MSTRG.246.1	Os01g0132000	IAI2	Similar to Wound-induced protease inhibitor (WIP1)	-	-	-	-	GO:0005576//extracellular region	GO:0004867//serine-type endopeptidase inhibitor activity;GO:0008233//peptidase activity;GO:0030414//peptidase inhibitor activity	GO:0010466//negative regulation of peptidase activity;GO:0010951//negative regulation of endopeptidase activity
28	MSTRG.246.1	Os01g0132100	-	Leucine-rich repeat domain containing protein	-	-	-	-	GO:0016020//membrane;GO:0016021//integral component of membrane	GO:0005515//protein binding	-
28	MSTRG.246.1	Os01g0132050	-	Hypothetical protein	-	-	-	-	-	-	-
29	MSTRG.250.2	Os01g0132500	-	Protein of unknown function DUF1639 domain containing protein	-	-	-	-	-	-	-
30	MSTRG.252.1	Os01g0132800	-	Peptidyl-tRNA hydrolase family protein	-	-	-	-	GO:0009507//chloroplast;GO:0009536//plastid;GO:0009570//chloroplast stroma	GO:0004045//aminoacyl-tRNA hydrolase activity	GO:0006397//mRNA processing;GO:0008380//RNA splicing
30	MSTRG.252.1	Os01g0132766	-	Zinc finger, C2H2-like domain containing protein	-	-	-	-	GO:0005634//nucleus	GO:0003676//nucleic acid binding;GO:0003700//transcription factor activity, sequence-specific DNA binding;GO:0043565//sequence-specific DNA binding;GO:0044212//transcription regulatory region DNA binding	GO:0006355//regulation of transcription, DNA-templated;GO:0009736//cytokinin-activated signaling pathway;GO:0009740//gibberellic acid mediated signaling pathway;GO:0010026//trichome differentiation
31	MSTRG.253.1	Os01g0132800	-	Peptidyl-tRNA hydrolase family protein	-	-	-	-	GO:0009507//chloroplast;GO:0009536//plastid;GO:0009570//chloroplast stroma	GO:0004045//aminoacyl-tRNA hydrolase activity	GO:0006397//mRNA processing;GO:0008380//RNA splicing
31	MSTRG.253.1	Os01g0132766	-	Zinc finger, C2H2-like domain containing protein	-	-	-	-	GO:0005634//nucleus	GO:0003676//nucleic acid binding;GO:0003700//transcription factor activity, sequence-specific DNA binding;GO:0043565//sequence-specific DNA binding;GO:0044212//transcription regulatory region DNA binding	GO:0006355//regulation of transcription, DNA-templated;GO:0009736//cytokinin-activated signaling pathway;GO:0009740//gibberellic acid mediated signaling pathway;GO:0010026//trichome differentiation
32	MSTRG.254.1	Os01g0132766	-	Zinc finger, C2H2-like domain containing protein	-	-	-	-	GO:0005634//nucleus	GO:0003676//nucleic acid binding;GO:0003700//transcription factor activity, sequence-specific DNA binding;GO:0043565//sequence-specific DNA binding;GO:0044212//transcription regulatory region DNA binding	GO:0006355//regulation of transcription, DNA-templated;GO:0009736//cytokinin-activated signaling pathway;GO:0009740//gibberellic acid mediated signaling pathway;GO:0010026//trichome differentiation
33	MSTRG.263.1	Os01g0134200	-	Similar to Universal stress protein family protein	-	-	-	-	-	-	-
34	MSTRG.295.1	Os01g0137875	-	Non-protein coding transcript	-	-	-	-	-	-	-
34	MSTRG.295.1	Os01g0137950	OsRLCK23	Similar to predicted protein	-	-	-	-	-	GO:0004672//protein kinase activity;GO:0005524//ATP binding	GO:0006468//protein phosphorylation
34	MSTRG.295.1	Os01g0138000	-	Hypothetical protein	-	-	-	-	-	-	-
34	MSTRG.295.1	Os01g0138232	-	Hypothetical protein	-	-	-	-	-	-	-
34	MSTRG.295.1	Os01g0138300	-	Conserved hypothetical protein	-	-	-	-	GO:0016020//membrane;GO:0016021//integral component of membrane	GO:0004672//protein kinase activity;GO:0005524//ATP binding;GO:0030247//polysaccharide binding	GO:0006468//protein phosphorylation
34	MSTRG.295.1	Os01g0138350	-	Non-protein coding transcript	-	-	-	-	-	-	-
34	MSTRG.295.1	Os01g0138400	-	Serine/threonine protein kinase domain containing protein	-	-	-	-	GO:0016021//integral component of membrane	GO:0004672//protein kinase activity;GO:0005524//ATP binding;GO:0030247//polysaccharide binding	GO:0006468//protein phosphorylation
34	MSTRG.295.1	Os01g0138451	-	Hypothetical protein	-	-	-	-	-	-	-
34	MSTRG.295.1	Os01g0137800	-	Non-protein coding transcript	-	-	-	-	-	-	-
34	MSTRG.295.1	Os01g0138100	-	Conserved hypothetical protein	-	-	-	-	-	-	-
35	MSTRG.308.1	Os01g0139200	-	Octicosapeptide/Phox/Bem1p domain containing protein	-	-	-	-	-	GO:0005515//protein binding	-
35	MSTRG.308.1	Os01g0139600	-	Similar to Lipid phosphate phosphatase 2 (EC 3.1.3.-) (AtLPP2) (Phosphatidic acid phosphatase 2) (AtPAP2) (Prenyl diphosphate phosphatase)	Metabolism;Metabolism;Metabolism	Global and overview maps;Lipid metabolism;Lipid metabolism	ko01110//Biosynthesis of secondary metabolites;ko00564//Glycerophospholipid metabolism;ko00561//Glycerolipid metabolism	K18693;K18693;K18693	GO:0005886//plasma membrane;GO:0016020//membrane;GO:0016021//integral component of membrane	GO:0008195//phosphatidate phosphatase activity	GO:0016311//dephosphorylation
35	MSTRG.308.1	Os01g0139000	-	Reticulon family protein	-	-	-	-	GO:0005783//endoplasmic reticulum;GO:0005789//endoplasmic reticulum membrane;GO:0016020//membrane;GO:0016021//integral component of membrane	-	-
36	MSTRG.313.2	Os01g0141700	OsWD40-2	Similar to predicted protein	Genetic Information Processing;Genetic Information Processing	Folding, sorting and degradation;Replication and repair	ko04120//Ubiquitin mediated proteolysis;ko03420//Nucleotide excision repair	K10140;K10140	GO:0005634//nucleus;GO:0080008//Cul4-RING E3 ubiquitin ligase complex	GO:0003684//damaged DNA binding;GO:0005515//protein binding	GO:0006281//DNA repair
37	MSTRG.315.1	Os01g0141600	OsRUS5	Protein of unknown function DUF647 family protein	-	-	-	-	GO:0005739//mitochondrion;GO:0009941//chloroplast envelope	-	GO:0010224//response to UV-B;GO:0032502//developmental process
37	MSTRG.315.1	Os01g0141900	-	Conserved hypothetical protein	-	-	-	-	-	-	-
38	MSTRG.331.3	Os01g0144380	-	Hypothetical gene	-	-	-	-	-	-	-
38	MSTRG.331.3	Os01g0144500	-	Ubiquitin fusion degradation protein UFD1 domain containing protein	Genetic Information Processing	Folding, sorting and degradation	ko04141//Protein processing in endoplasmic reticulum	K14016	GO:0034098//VCP-NPL4-UFD1 AAA ATPase complex	GO:0031593//polyubiquitin binding	GO:0006511//ubiquitin-dependent protein catabolic process;GO:0030433//ER-associated ubiquitin-dependent protein catabolic process;GO:0071712//ER-associated misfolded protein catabolic process
38	MSTRG.331.3	Os01g0144700	-	Conserved hypothetical protein	-	-	-	-	GO:0016020//membrane;GO:0016021//integral component of membrane	-	-
38	MSTRG.331.3	Os01g0144800	-	Protein of unknown function DUF3681 domain containing protein	-	-	-	-	GO:0016020//membrane;GO:0016021//integral component of membrane	-	-
38	MSTRG.331.3	Os01g0144340	-	Similar to Actin-related protein 5	-	-	-	-	-	-	-
39	MSTRG.337.1	Os01g0146101	-	Conserved hypothetical protein	-	-	-	-	-	-	-
40	MSTRG.340.1	Os01g0146600	-	Conserved hypothetical protein	-	-	-	-	-	-	-
41	MSTRG.343.1	Os01g0147200	IWS1	IWS1, C-terminal family protein	-	-	-	-	GO:0005634//nucleus	-	-
41	MSTRG.343.1	Os01g0147300	OsSTA4	Similar to membrane protein	-	-	-	-	GO:0016020//membrane;GO:0016021//integral component of membrane	GO:0004252//serine-type endopeptidase activity;GO:0008233//peptidase activity;GO:0016787//hydrolase activity	GO:0006508//proteolysis
41	MSTRG.343.1	Os01g0147400	-	Uncharacterised domain XH domain containing protein	-	-	-	-	-	-	-
41	MSTRG.343.1	Os01g0147600	-	Conserved hypothetical protein	-	-	-	-	-	-	-
41	MSTRG.343.1	Os01g0147650	-	Non-protein coding transcript	-	-	-	-	-	-	-
42	MSTRG.349.1	Os01g0147900	OsTPI1	Triosephosphate isomerase, Glycolytic enzyme, Key component in XA3/XA26-mediated resistance to Xo	Metabolism;Metabolism;Metabolism;Metabolism;Metabolism;Metabolism;Metabolism;Metabolism	Global and overview maps;Global and overview maps;Global and overview maps;Global and overview maps;Carbohydrate metabolism;Energy metabolism;Carbohydrate metabolism;Carbohydrate metabolism	ko01100//Metabolic pathways;ko01110//Biosynthesis of secondary metabolites;ko01200//Carbon metabolism;ko01230//Biosynthesis of amino acids;ko00010//Glycolysis / Gluconeogenesis;ko00710//Carbon fixation in photosynthetic organisms;ko00562//Inositol phosphate metabolism;ko00051//Fructose and mannose metabolism	K01803;K01803;K01803;K01803;K01803;K01803;K01803;K01803	GO:0005737//cytoplasm;GO:0005829//cytosol	GO:0003824//catalytic activity;GO:0004807//triose-phosphate isomerase activity;GO:0016853//isomerase activity	GO:0006094//gluconeogenesis;GO:0006096//glycolytic process;GO:0019563//glycerol catabolic process;GO:0046166//glyceraldehyde-3-phosphate biosynthetic process
42	MSTRG.349.1	Os01g0147950	-	Non-protein coding transcript	-	-	-	-	-	-	-
42	MSTRG.349.1	Os01g0148000	-	Similar to predicted protein	-	-	-	-	GO:0000151//ubiquitin ligase complex;GO:0005737//cytoplasm	GO:0008270//zinc ion binding;GO:0016740//transferase activity;GO:0046872//metal ion binding;GO:0061630//ubiquitin protein ligase activity	GO:0016567//protein ubiquitination;GO:0071596//ubiquitin-dependent protein catabolic process via the N-end rule pathway
42	MSTRG.349.1	Os01g0148050	-	Hypothetical conserved gene	-	-	-	-	GO:0000151//ubiquitin ligase complex;GO:0005737//cytoplasm	GO:0008270//zinc ion binding;GO:0016740//transferase activity;GO:0046872//metal ion binding;GO:0061630//ubiquitin protein ligase activity	GO:0016567//protein ubiquitination;GO:0071596//ubiquitin-dependent protein catabolic process via the N-end rule pathway
43	MSTRG.351.1	Os01g0148050	-	Hypothetical conserved gene	-	-	-	-	GO:0000151//ubiquitin ligase complex;GO:0005737//cytoplasm	GO:0008270//zinc ion binding;GO:0016740//transferase activity;GO:0046872//metal ion binding;GO:0061630//ubiquitin protein ligase activity	GO:0016567//protein ubiquitination;GO:0071596//ubiquitin-dependent protein catabolic process via the N-end rule pathway
44	MSTRG.352.1	Os01g0148050	-	Hypothetical conserved gene	-	-	-	-	GO:0000151//ubiquitin ligase complex;GO:0005737//cytoplasm	GO:0008270//zinc ion binding;GO:0016740//transferase activity;GO:0046872//metal ion binding;GO:0061630//ubiquitin protein ligase activity	GO:0016567//protein ubiquitination;GO:0071596//ubiquitin-dependent protein catabolic process via the N-end rule pathway
44	MSTRG.352.1	Os01g0148200	-	Hypothetical protein	-	-	-	-	GO:0016020//membrane;GO:0016021//integral component of membrane	-	-
45	MSTRG.353.3	Os01g0148200	-	Hypothetical protein	-	-	-	-	GO:0016020//membrane;GO:0016021//integral component of membrane	-	-
45	MSTRG.353.3	Os01g0148500	-	Protein of unknown function DUF1677, Oryza sativa family protein	-	-	-	-	-	GO:0005515//protein binding	-
46	MSTRG.402.1	Os01g0153500	-	Protein of unknown function DUF674 domain containing protein	-	-	-	-	-	-	-
46	MSTRG.402.1	Os01g0153550	-	Hypothetical protein	-	-	-	-	-	-	-
46	MSTRG.402.1	Os01g0153600	-	Protein of unknown function DUF674 domain containing protein	-	-	-	-	-	-	-
46	MSTRG.402.1	Os01g0153625	-	Hypothetical protein	-	-	-	-	-	-	-
46	MSTRG.402.1	Os01g0153700	-	Conserved hypothetical protein	-	-	-	-	-	-	-
46	MSTRG.402.1	Os01g0153800	-	Similar to gibberellin receptor GID1L2	-	-	-	-	-	GO:0016787//hydrolase activity	GO:0009056//catabolic process
46	MSTRG.402.1	Os01g0153900	-	Hypothetical conserved gene	-	-	-	-	-	-	-
46	MSTRG.402.1	Os01g0153950	-	Protein of unknown function DUF674 domain containing protein	-	-	-	-	GO:0016021//integral component of membrane	-	-
46	MSTRG.402.1	Os01g0154000	-	Conserved hypothetical protein	-	-	-	-	-	-	-
47	MSTRG.404.1	Os01g0154600	-	Protein of unknown function DUF674 domain containing protein	-	-	-	-	-	-	-
48	MSTRG.408.1	Os01g0154950	-	Hypothetical gene	-	-	-	-	-	-	-
48	MSTRG.408.1	Os01g0155000	Hsr203j	Alpha/beta hydrolase fold-3 domain containing protein	-	-	-	-	-	GO:0016787//hydrolase activity	GO:0009056//catabolic process
48	MSTRG.408.1	Os01g0155300	-	Similar to dirigent-like protein	-	-	-	-	GO:0005576//extracellular region;GO:0048046//apoplast	-	-
48	MSTRG.408.1	Os01g0155400	-	Conserved hypothetical protein	-	-	-	-	-	-	-
49	MSTRG.414.1	Os01g0157200	-	Conserved hypothetical protein	-	-	-	-	-	-	-
49	MSTRG.414.1	Os01g0157400	-	Conserved hypothetical protein	-	-	-	-	-	-	-
49	MSTRG.414.1	Os01g0157500	-	Protein of unknown function DUF1110 domain containing protein	-	-	-	-	-	-	-
49	MSTRG.414.1	Os01g0157600	-	Conserved hypothetical protein	-	-	-	-	-	-	-
49	MSTRG.414.1	Os01g0157800	OsDjC2	Heat shock protein DnaJ, N-terminal domain containing protein	-	-	-	-	GO:0001405//presequence translocase-associated import motor	GO:0001671//ATPase activator activity	GO:0030150//protein import into mitochondrial matrix;GO:0032781//positive regulation of ATPase activity
49	MSTRG.414.1	Os01g0157900	-	Protein of unknown function Cys-rich family protein	-	-	-	-	-	-	-
49	MSTRG.414.1	Os01g0158000	-	Importin alpha-2 subunit	-	-	-	-	GO:0005634//nucleus;GO:0005643//nuclear pore;GO:0005654//nucleoplasm;GO:0005737//cytoplasm;GO:0005829//cytosol;GO:0048471//perinuclear region of cytoplasm	GO:0005515//protein binding;GO:0008139//nuclear localization sequence binding;GO:0008565//protein transporter activity;GO:0061608//nuclear import signal receptor activity	GO:0006606//protein import into nucleus;GO:0006607//NLS-bearing protein import into nucleus;GO:0015031//protein transport
50	MSTRG.418.1	Os01g0157600	-	Conserved hypothetical protein	-	-	-	-	-	-	-
50	MSTRG.418.1	Os01g0157700	OsGT43D	Glycosyl transferase, family 43 domain containing protein	-	-	-	-	GO:0000139//Golgi membrane;GO:0005794//Golgi apparatus;GO:0016020//membrane;GO:0016021//integral component of membrane	GO:0015018//galactosylgalactosylxylosylprotein 3-beta-glucuronosyltransferase activity;GO:0016740//transferase activity;GO:0042285//xylosyltransferase activity	GO:0009834//plant-type secondary cell wall biogenesis;GO:0010417//glucuronoxylan biosynthetic process;GO:0071555//cell wall organization
50	MSTRG.418.1	Os01g0157800	OsDjC2	Heat shock protein DnaJ, N-terminal domain containing protein	-	-	-	-	GO:0001405//presequence translocase-associated import motor	GO:0001671//ATPase activator activity	GO:0030150//protein import into mitochondrial matrix;GO:0032781//positive regulation of ATPase activity
50	MSTRG.418.1	Os01g0157900	-	Protein of unknown function Cys-rich family protein	-	-	-	-	-	-	-
50	MSTRG.418.1	Os01g0158100	-	Pentatricopeptide repeat containing protein	-	-	-	-	-	GO:0005515//protein binding	-
50	MSTRG.418.1	Os01g0158200	OsSCP1	Similar to Serine carboxypeptidase II-1 precursor (EC 3.4.16.6) (CP-MII.1) (Fragment)	-	-	-	-	-	GO:0004180//carboxypeptidase activity;GO:0004185//serine-type carboxypeptidase activity;GO:0008233//peptidase activity;GO:0016787//hydrolase activity	GO:0006508//proteolysis;GO:0051603//proteolysis involved in cellular protein catabolic process
51	MSTRG.439.3	Os01g0164300	-	Pollen Ole e 1 allergen/extensin domain containing protein	-	-	-	-	GO:0071944//cell periphery	-	-
51	MSTRG.439.3	Os01g0164500	BIP115	Similar to ATP-dependent RNA helicase-like protein	-	-	-	-	GO:0005730//nucleolus	GO:0000166//nucleotide binding;GO:0003676//nucleic acid binding;GO:0003723//RNA binding;GO:0003724//RNA helicase activity;GO:0004386//helicase activity;GO:0005524//ATP binding;GO:0016787//hydrolase activity	-
51	MSTRG.439.3	Os01g0164600	OsPP2C01	Protein phosphatase 2C-related domain containing protein	-	-	-	-	-	GO:0003824//catalytic activity;GO:0004721//phosphoprotein phosphatase activity;GO:0016787//hydrolase activity;GO:0046872//metal ion binding	-
51	MSTRG.439.3	Os01g0164650	-	Non-protein coding transcript	-	-	-	-	-	-	-
51	MSTRG.439.3	Os01g0164700	-	Uncharacterised protein family UPF0363 domain containing protein	-	-	-	-	GO:0071818//BAT3 complex	GO:0005515//protein binding	GO:0045048//protein insertion into ER membrane
52	MSTRG.453.2	Os01g0166800	-	Similar to ETG1 (E2F TARGET GENE 1)	-	-	-	-	GO:0000790//nuclear chromatin;GO:0005634//nucleus;GO:0009941//chloroplast envelope;GO:0042555//MCM complex	GO:0003682//chromatin binding	GO:0006260//DNA replication;GO:0006261//DNA-dependent DNA replication;GO:0006301//postreplication repair;GO:0007062//sister chromatid cohesion
52	MSTRG.453.2	Os01g0166700	-	Saposin family protein	-	-	-	-	GO:0005764//lysosome	-	GO:0006629//lipid metabolic process;GO:0006665//sphingolipid metabolic process
53	MSTRG.459.1	Os01g0167600	-	Hypothetical conserved gene	-	-	-	-	GO:0016020//membrane;GO:0016021//integral component of membrane	-	-
53	MSTRG.459.1	Os01g0167750	-	Pentatricopeptide repeat domain containing protein	-	-	-	-	-	GO:0005515//protein binding	-
53	MSTRG.459.1	Os01g0167800	-	Conserved hypothetical protein	-	-	-	-	-	-	-
54	MSTRG.480.1	Os01g0170600	-	Hypothetical conserved gene	-	-	-	-	-	-	-
54	MSTRG.480.1	Os01g0170800	-	Pentatricopeptide repeat domain containing protein	-	-	-	-	GO:0005739//mitochondrion	GO:0005515//protein binding	-
55	MSTRG.485.1	Os01g0170800	-	Pentatricopeptide repeat domain containing protein	-	-	-	-	GO:0005739//mitochondrion	GO:0005515//protein binding	-
55	MSTRG.485.1	Os01g0170900	OsCLE101	Conserved hypothetical protein	-	-	-	-	-	-	-
56	MSTRG.495.1	Os01g0172400	OsPLDalpha1	Similar to Phospholipase D alpha 1	Metabolism;Metabolism;Cellular Processes;Metabolism;Metabolism	Global and overview maps;Global and overview maps;Transport and catabolism;Lipid metabolism;Lipid metabolism	ko01100//Metabolic pathways;ko01110//Biosynthesis of secondary metabolites;ko04144//Endocytosis;ko00564//Glycerophospholipid metabolism;ko00565//Ether lipid metabolism	K01115;K01115;K01115;K01115;K01115	GO:0016020//membrane	GO:0003824//catalytic activity;GO:0004630//phospholipase D activity;GO:0005509//calcium ion binding;GO:0016787//hydrolase activity;GO:0070290//N-acylphosphatidylethanolamine-specific phospholipase D activity	GO:0006629//lipid metabolic process;GO:0016042//lipid catabolic process;GO:0046470//phosphatidylcholine metabolic process
56	MSTRG.495.1	Os01g0172600	-	Similar to electron carrier/ heme binding / peroxidase	Metabolism;Metabolism;Metabolism	Global and overview maps;Global and overview maps;Biosynthesis of other secondary metabolites	ko01100//Metabolic pathways;ko01110//Biosynthesis of secondary metabolites;ko00940//Phenylpropanoid biosynthesis	K00430;K00430;K00430	GO:0009505//plant-type cell wall;GO:0009506//plasmodesma	GO:0004601//peroxidase activity;GO:0016491//oxidoreductase activity;GO:0020037//heme binding;GO:0046872//metal ion binding	GO:0006979//response to oxidative stress;GO:0042744//hydrogen peroxide catabolic process;GO:0055114//oxidation-reduction process;GO:0098869//cellular oxidant detoxification
56	MSTRG.495.1	Os01g0172701	-	Regulator of chromosome condensation, RCC1 domain containing protein	-	-	-	-	-	-	-
56	MSTRG.495.1	Os01g0172800	-	Embryo-specific 3 family protein	-	-	-	-	-	GO:0005515//protein binding	-
56	MSTRG.495.1	Os01g0172900	PG	Glycoside hydrolase, family 28 domain containing protein	Metabolism;Metabolism	Global and overview maps;Carbohydrate metabolism	ko01100//Metabolic pathways;ko00040//Pentose and glucuronate interconversions	K01184;K01184	-	GO:0004650//polygalacturonase activity;GO:0016787//hydrolase activity;GO:0016798//hydrolase activity, acting on glycosyl bonds	GO:0005975//carbohydrate metabolic process;GO:0008152//metabolic process
56	MSTRG.495.1	Os01g0173000	-	Putative thiol-disulphide oxidoreductase DCC domain containing protein	-	-	-	-	GO:0010287//plastoglobule	-	-
56	MSTRG.495.1	Os01g0173100	OsAlba1	Alba, DNA/RNA-binding protein family protein	-	-	-	-	-	GO:0003676//nucleic acid binding	-
57	MSTRG.502.1	Os01g0173900	OsABCC3	Similar to MRP-like ABC transporter	Environmental Information Processing	Membrane transport	ko02010//ABC transporters	K05665	GO:0000325//plant-type vacuole;GO:0005774//vacuolar membrane;GO:0016020//membrane;GO:0016021//integral component of membrane	GO:0000166//nucleotide binding;GO:0005524//ATP binding;GO:0016887//ATPase activity;GO:0042626//ATPase activity, coupled to transmembrane movement of substances	GO:0055085//transmembrane transport
57	MSTRG.502.1	Os01g0173950	-	Non-protein coding transcript	-	-	-	-	-	-	-
57	MSTRG.502.1	Os01g0174100	-	Conserved hypothetical protein	-	-	-	-	-	-	-
57	MSTRG.502.1	Os01g0174200	-	Hypothetical protein	-	-	-	-	-	-	-
57	MSTRG.502.1	Os01g0174300	-	Flavoprotein pyridine nucleotide cytochrome reductase domain containing protein	Metabolism	Carbohydrate metabolism	ko00520//Amino sugar and nucleotide sugar metabolism	K00326	GO:0005739//mitochondrion;GO:0005794//Golgi apparatus;GO:0009505//plant-type cell wall	GO:0004128//cytochrome-b5 reductase activity, acting on NAD(P)H;GO:0005507//copper ion binding;GO:0016491//oxidoreductase activity	GO:0009651//response to salt stress;GO:0055114//oxidation-reduction process
58	MSTRG.509.1	Os01g0174100	-	Conserved hypothetical protein	-	-	-	-	-	-	-
58	MSTRG.509.1	Os01g0174200	-	Hypothetical protein	-	-	-	-	-	-	-
58	MSTRG.509.1	Os01g0174300	-	Flavoprotein pyridine nucleotide cytochrome reductase domain containing protein	Metabolism	Carbohydrate metabolism	ko00520//Amino sugar and nucleotide sugar metabolism	K00326	GO:0005739//mitochondrion;GO:0005794//Golgi apparatus;GO:0009505//plant-type cell wall	GO:0004128//cytochrome-b5 reductase activity, acting on NAD(P)H;GO:0005507//copper ion binding;GO:0016491//oxidoreductase activity	GO:0009651//response to salt stress;GO:0055114//oxidation-reduction process
58	MSTRG.509.1	Os01g0174600	OsC3H1	Zinc finger, CCCH-type domain containing protein	-	-	-	-	GO:0005829//cytosol	GO:0003677//DNA binding;GO:0003730//mRNA 3'-UTR binding;GO:0046872//metal ion binding	GO:0061158//3'-UTR-mediated mRNA destabilization
58	MSTRG.509.1	Os01g0174700	OsPIDlike	Similar to Akt (Fragment)	-	-	-	-	GO:0005634//nucleus;GO:0005737//cytoplasm;GO:0005886//plasma membrane	GO:0000166//nucleotide binding;GO:0004672//protein kinase activity;GO:0004674//protein serine/threonine kinase activity;GO:0005524//ATP binding;GO:0016301//kinase activity;GO:0016740//transferase activity	GO:0006468//protein phosphorylation;GO:0007275//multicellular organism development;GO:0009734//auxin-activated signaling pathway;GO:0016310//phosphorylation;GO:0048825//cotyledon development
59	MSTRG.511.1	Os01g0174400	-	Hypothetical gene	-	-	-	-	-	-	-
59	MSTRG.511.1	Os01g0174500	-	Metridin-like ShK toxin domain containing protein	Metabolism;Metabolism	Global and overview maps;Amino acid metabolism	ko01100//Metabolic pathways;ko00330//Arginine and proline metabolism	K00472;K00472	GO:0005783//endoplasmic reticulum	GO:0004656//procollagen-proline 4-dioxygenase activity;GO:0005506//iron ion binding;GO:0016705//oxidoreductase activity, acting on paired donors, with incorporation or reduction of molecular oxygen;GO:0031418//L-ascorbic acid binding	GO:0018401//peptidyl-proline hydroxylation to 4-hydroxy-L-proline;GO:0055114//oxidation-reduction process
59	MSTRG.511.1	Os01g0174600	OsC3H1	Zinc finger, CCCH-type domain containing protein	-	-	-	-	GO:0005829//cytosol	GO:0003677//DNA binding;GO:0003730//mRNA 3'-UTR binding;GO:0046872//metal ion binding	GO:0061158//3'-UTR-mediated mRNA destabilization
59	MSTRG.511.1	Os01g0174700	OsPIDlike	Similar to Akt (Fragment)	-	-	-	-	GO:0005634//nucleus;GO:0005737//cytoplasm;GO:0005886//plasma membrane	GO:0000166//nucleotide binding;GO:0004672//protein kinase activity;GO:0004674//protein serine/threonine kinase activity;GO:0005524//ATP binding;GO:0016301//kinase activity;GO:0016740//transferase activity	GO:0006468//protein phosphorylation;GO:0007275//multicellular organism development;GO:0009734//auxin-activated signaling pathway;GO:0016310//phosphorylation;GO:0048825//cotyledon development
59	MSTRG.511.1	Os01g0174900	OsGRX1	Thioredoxin fold domain containing protein	-	-	-	-	GO:0005623//cell;GO:0005739//mitochondrion;GO:0005759//mitochondrial matrix	GO:0009055//electron carrier activity;GO:0015035//protein disulfide oxidoreductase activity;GO:0015038//glutathione disulfide oxidoreductase activity;GO:0046872//metal ion binding;GO:0051536//iron-sulfur cluster binding;GO:0051537//2 iron, 2 sulfur cluster binding	GO:0022900//electron transport chain;GO:0045454//cell redox homeostasis;GO:0055114//oxidation-reduction process
59	MSTRG.511.1	Os01g0175000	-	Similar to Biostress-resistance-related protein (Fragment)	Metabolism	Lipid metabolism	ko00564//Glycerophospholipid metabolism	K06130	-	GO:0016787//hydrolase activity	-
60	MSTRG.512.1	Os01g0174600	OsC3H1	Zinc finger, CCCH-type domain containing protein	-	-	-	-	GO:0005829//cytosol	GO:0003677//DNA binding;GO:0003730//mRNA 3'-UTR binding;GO:0046872//metal ion binding	GO:0061158//3'-UTR-mediated mRNA destabilization
60	MSTRG.512.1	Os01g0174700	OsPIDlike	Similar to Akt (Fragment)	-	-	-	-	GO:0005634//nucleus;GO:0005737//cytoplasm;GO:0005886//plasma membrane	GO:0000166//nucleotide binding;GO:0004672//protein kinase activity;GO:0004674//protein serine/threonine kinase activity;GO:0005524//ATP binding;GO:0016301//kinase activity;GO:0016740//transferase activity	GO:0006468//protein phosphorylation;GO:0007275//multicellular organism development;GO:0009734//auxin-activated signaling pathway;GO:0016310//phosphorylation;GO:0048825//cotyledon development
60	MSTRG.512.1	Os01g0174900	OsGRX1	Thioredoxin fold domain containing protein	-	-	-	-	GO:0005623//cell;GO:0005739//mitochondrion;GO:0005759//mitochondrial matrix	GO:0009055//electron carrier activity;GO:0015035//protein disulfide oxidoreductase activity;GO:0015038//glutathione disulfide oxidoreductase activity;GO:0046872//metal ion binding;GO:0051536//iron-sulfur cluster binding;GO:0051537//2 iron, 2 sulfur cluster binding	GO:0022900//electron transport chain;GO:0045454//cell redox homeostasis;GO:0055114//oxidation-reduction process
60	MSTRG.512.1	Os01g0175000	-	Similar to Biostress-resistance-related protein (Fragment)	Metabolism	Lipid metabolism	ko00564//Glycerophospholipid metabolism	K06130	-	GO:0016787//hydrolase activity	-
61	MSTRG.516.1	Os01g0175100	-	Kv1.4 voltage-gated K+ channel family protein	-	-	-	-	-	-	-
61	MSTRG.516.1	Os01g0175400	-	Ankyrin repeat containing protein	-	-	-	-	-	GO:0005515//protein binding	-
62	MSTRG.518.1	Os01g0175500	-	Protein of unknown function DUF1618 domain containing protein	-	-	-	-	-	-	-
62	MSTRG.518.1	Os01g0175633	-	Hypothetical protein	-	-	-	-	-	-	-
62	MSTRG.518.1	Os01g0175600	BOR2	Boron (B) transporte	-	-	-	-	GO:0005887//integral component of plasma membrane;GO:0016020//membrane;GO:0016021//integral component of membrane	GO:0005452//inorganic anion exchanger activity;GO:0080139//borate efflux transmembrane transporter activity	GO:0006820//anion transport;GO:0035445//borate transmembrane transport;GO:0046713//borate transport;GO:0051453//regulation of intracellular pH
63	MSTRG.526.1	Os01g0176000	OsUGT98B1	UDP-glucuronosyl/UDP-glucosyltransferase family protein	Metabolism	Biosynthesis of other secondary metabolites	ko00944//Flavone and flavonol biosynthesis	K22771	GO:0043231//intracellular membrane-bounded organelle	GO:0008194//UDP-glycosyltransferase activity;GO:0016740//transferase activity;GO:0016757//transferase activity, transferring glycosyl groups;GO:0016758//transferase activity, transferring hexosyl groups;GO:0080043//quercetin 3-O-glucosyltransferase activity;GO:0080044//quercetin 7-O-glucosyltransferase activity	-
63	MSTRG.526.1	Os01g0176050	-	Hypothetical protein	-	-	-	-	-	-	-
63	MSTRG.526.1	Os01g0176100	-	UDP-glucuronosyl/UDP-glucosyltransferase family protein	Metabolism	Biosynthesis of other secondary metabolites	ko00944//Flavone and flavonol biosynthesis	K22771	GO:0043231//intracellular membrane-bounded organelle	GO:0008194//UDP-glycosyltransferase activity;GO:0016740//transferase activity;GO:0016757//transferase activity, transferring glycosyl groups;GO:0016758//transferase activity, transferring hexosyl groups;GO:0080043//quercetin 3-O-glucosyltransferase activity;GO:0080044//quercetin 7-O-glucosyltransferase activity	-
63	MSTRG.526.1	Os01g0176150	-	Hypothetical protein	-	-	-	-	-	-	-
63	MSTRG.526.1	Os01g0176200	-	UDP-glucuronosyl/UDP-glucosyltransferase family protein	Metabolism	Biosynthesis of other secondary metabolites	ko00944//Flavone and flavonol biosynthesis	K22771	GO:0043231//intracellular membrane-bounded organelle	GO:0008194//UDP-glycosyltransferase activity;GO:0016740//transferase activity;GO:0016757//transferase activity, transferring glycosyl groups;GO:0016758//transferase activity, transferring hexosyl groups;GO:0080043//quercetin 3-O-glucosyltransferase activity;GO:0080044//quercetin 7-O-glucosyltransferase activity	-
63	MSTRG.526.1	Os01g0176300	-	Pentatricopeptide repeat domain containing protein	-	-	-	-	GO:0043231//intracellular membrane-bounded organelle	GO:0005515//protein binding;GO:0008270//zinc ion binding	GO:0009451//RNA modification
63	MSTRG.526.1	Os01g0175850	-	UDP-glucuronosyl/UDP-glucosyltransferase domain containing protein	Metabolism;Metabolism	Global and overview maps;Metabolism of terpenoids and polyketides	ko01110//Biosynthesis of secondary metabolites;ko00908//Zeatin biosynthesis	K13496;K13496	-	-	-
64	MSTRG.554.1	Os01g0179200	-	Syntaxin, N-terminal domain containing protein	Genetic Information Processing	Folding, sorting and degradation	ko04130//SNARE interactions in vesicular transport	K08490	GO:0000139//Golgi membrane;GO:0012505//endomembrane system;GO:0016020//membrane;GO:0016021//integral component of membrane;GO:0031201//SNARE complex	GO:0000149//SNARE binding;GO:0005484//SNAP receptor activity	GO:0006886//intracellular protein transport;GO:0006888//ER to Golgi vesicle-mediated transport;GO:0006906//vesicle fusion;GO:0016192//vesicle-mediated transport;GO:0048278//vesicle docking
64	MSTRG.554.1	Os01g0179400	SSG4	Amyloplast-localized protein containing DUF490, Regulation of starch grain size	-	-	-	-	GO:0005887//integral component of plasma membrane;GO:0009501//amyloplast;GO:0009507//chloroplast;GO:0009528//plastid inner membrane;GO:0009536//plastid;GO:0009706//chloroplast inner membrane;GO:0016020//membrane;GO:0016021//integral component of membrane;GO:0031972//chloroplast intermembrane space;GO:0048046//apoplast	-	GO:0009306//protein secretion;GO:0009660//amyloplast organization;GO:0015031//protein transport
65	MSTRG.563.3	Os01g0180400	-	Protein of unknown function DUF581 domain containing protein	-	-	-	-	-	-	-
66	MSTRG.576.1	Os01g0182500	-	Hypothetical conserved gene	-	-	-	-	-	-	-
66	MSTRG.576.1	Os01g0182400	-	Conserved hypothetical protein	-	-	-	-	GO:0005634//nucleus	GO:0003682//chromatin binding	-
67	MSTRG.589.1	Os01g0183950	-	Hypothetical protein	-	-	-	-	-	-	-
67	MSTRG.589.1	Os01g0184000	-	NUC156 family protein	-	-	-	-	GO:0005634//nucleus	GO:0000166//nucleotide binding;GO:0005524//ATP binding;GO:0051731//polynucleotide 5'-hydroxyl-kinase activity	GO:0000448//cleavage in ITS2 between 5.8S rRNA and LSU-rRNA of tricistronic rRNA transcript (SSU-rRNA, 5.8S rRNA, LSU-rRNA);GO:0006396//RNA processing;GO:0016310//phosphorylation
67	MSTRG.589.1	Os01g0184050	-	Hypothetical protein	-	-	-	-	-	-	-
67	MSTRG.589.1	Os01g0184100	OsHsp18.0	Class II small heat shock protein, Positive regulation in both Xoo resistance and heat/salt toleranc	Genetic Information Processing	Folding, sorting and degradation	ko04141//Protein processing in endoplasmic reticulum	K13993	GO:0005737//cytoplasm	GO:0043621//protein self-association;GO:0051082//unfolded protein binding	GO:0000302//response to reactive oxygen species;GO:0006457//protein folding;GO:0009408//response to heat;GO:0009651//response to salt stress;GO:0042542//response to hydrogen peroxide;GO:0051259//protein oligomerization
68	MSTRG.619.1	Os01g0189100	-	Ankyrin domain containing protein	-	-	-	-	-	GO:0005515//protein binding	-
69	MSTRG.619.2	Os01g0189100	-	Ankyrin domain containing protein	-	-	-	-	-	GO:0005515//protein binding	-
70	MSTRG.622.1	Os01g0189100	-	Ankyrin domain containing protein	-	-	-	-	-	GO:0005515//protein binding	-
70	MSTRG.622.1	Os01g0189700	-	Similar to cDNA clone:001-031-C06, full insert sequence	-	-	-	-	GO:0016020//membrane;GO:0016021//integral component of membrane	GO:0005515//protein binding	-
71	MSTRG.623.3	Os01g0189100	-	Ankyrin domain containing protein	-	-	-	-	-	GO:0005515//protein binding	-
71	MSTRG.623.3	Os01g0189800	-	Protein of unknown function DUF1618 domain containing protein	-	-	-	-	-	-	-
71	MSTRG.623.3	Os01g0190000	-	Similar to oxidoreductase	-	-	-	-	GO:0005634//nucleus	GO:0016491//oxidoreductase activity;GO:0016702//oxidoreductase activity, acting on single donors with incorporation of molecular oxygen, incorporation of two atoms of oxygen	GO:0055114//oxidation-reduction process
72	MSTRG.623.5	Os01g0189100	-	Ankyrin domain containing protein	-	-	-	-	-	GO:0005515//protein binding	-
72	MSTRG.623.5	Os01g0189800	-	Protein of unknown function DUF1618 domain containing protein	-	-	-	-	-	-	-
72	MSTRG.623.5	Os01g0190000	-	Similar to oxidoreductase	-	-	-	-	GO:0005634//nucleus	GO:0016491//oxidoreductase activity;GO:0016702//oxidoreductase activity, acting on single donors with incorporation of molecular oxygen, incorporation of two atoms of oxygen	GO:0055114//oxidation-reduction process
73	MSTRG.623.6	Os01g0189100	-	Ankyrin domain containing protein	-	-	-	-	-	GO:0005515//protein binding	-
73	MSTRG.623.6	Os01g0189800	-	Protein of unknown function DUF1618 domain containing protein	-	-	-	-	-	-	-
73	MSTRG.623.6	Os01g0190000	-	Similar to oxidoreductase	-	-	-	-	GO:0005634//nucleus	GO:0016491//oxidoreductase activity;GO:0016702//oxidoreductase activity, acting on single donors with incorporation of molecular oxygen, incorporation of two atoms of oxygen	GO:0055114//oxidation-reduction process
74	MSTRG.646.1	Os01g0193900	OsALYL1	Homeodomain-like domain containing protein	-	-	-	-	GO:0005654//nucleoplasm;GO:0017053//transcriptional repressor complex	GO:0003677//DNA binding	GO:0000003//reproduction;GO:0006351//transcription, DNA-templated;GO:0006357//regulation of transcription from RNA polymerase II promoter;GO:0051726//regulation of cell cycle
74	MSTRG.646.1	Os01g0194000	-	Conserved hypothetical protein	-	-	-	-	-	-	-
75	MSTRG.655.1	Os01g0196300	DPF	Basic helix-loop-helix (bHLH) transcription factor, Diterpenoid phytoalexin factor, Biosynthesis of diterpenoid phytoalexins, Stress respons	-	-	-	-	GO:0005634//nucleus	GO:0046983//protein dimerization activity	GO:0006355//regulation of transcription, DNA-templated
75	MSTRG.655.1	Os01g0196500	-	Prenylated rab acceptor PRA1 family protein	-	-	-	-	GO:0016020//membrane;GO:0016021//integral component of membrane	-	-
75	MSTRG.655.1	Os01g0196600	-	Similar to 260 kDa major acidic fibroblast growth factor-stimulated phosphoprotein (Fragment)	-	-	-	-	GO:0005773//vacuole;GO:0016021//integral component of membrane	GO:0003824//catalytic activity	-
76	MSTRG.669.1	Os01g0197350	-	Hypothetical genes	-	-	-	-	GO:0016020//membrane;GO:0016021//integral component of membrane	-	-
76	MSTRG.669.1	Os01g0197450	-	Pentatricopeptide repeat domain containing protein	-	-	-	-	GO:0043231//intracellular membrane-bounded organelle	GO:0005515//protein binding	GO:0009451//RNA modification;GO:0031930//mitochondria-nucleus signaling pathway
76	MSTRG.669.1	Os01g0197500	-	Similar to predicted protein	-	-	-	-	GO:0016020//membrane;GO:0016021//integral component of membrane	-	-
76	MSTRG.669.1	Os01g0197700	Gn1a	Cytokinin oxidase/dehydrogenase, Regulation of grain productio	Metabolism	Metabolism of terpenoids and polyketides	ko00908//Zeatin biosynthesis	K00279	GO:0005576//extracellular region;GO:0005615//extracellular space	GO:0003824//catalytic activity;GO:0016491//oxidoreductase activity;GO:0019139//cytokinin dehydrogenase activity;GO:0050660//flavin adenine dinucleotide binding;GO:0071949//FAD binding	GO:0007275//multicellular organism development;GO:0009690//cytokinin metabolic process;GO:0009736//cytokinin-activated signaling pathway;GO:0010229//inflorescence development;GO:0055114//oxidation-reduction process
76	MSTRG.669.1	Os01g0197400	-	Conserved hypothetical protein	-	-	-	-	-	-	-
77	MSTRG.679.1	Os01g0199950	-	Hypothetical gene	-	-	-	-	-	-	-
77	MSTRG.679.1	Os01g0199400	-	Alpha/beta hydrolase family protein	-	-	-	-	GO:0005783//endoplasmic reticulum;GO:0005794//Golgi apparatus;GO:0016020//membrane;GO:0016021//integral component of membrane	GO:0016298//lipase activity	-
77	MSTRG.679.1	Os01g0199550	-	Non-protein coding transcript	-	-	-	-	-	-	-
77	MSTRG.679.1	Os01g0199900	-	Similar to Phosphoribosylaminoimidazole carboxylase catalytic subunit (EC 4.1.1.21) (AIR carboxylase) (AIRC)	Metabolism;Metabolism;Metabolism	Global and overview maps;Global and overview maps;Nucleotide metabolism	ko01100//Metabolic pathways;ko01110//Biosynthesis of secondary metabolites;ko00230//Purine metabolism	K11808;K11808;K11808	GO:0009507//chloroplast	GO:0000166//nucleotide binding;GO:0004638//phosphoribosylaminoimidazole carboxylase activity;GO:0005524//ATP binding;GO:0046872//metal ion binding	GO:0006189//'de novo' IMP biosynthetic process
78	MSTRG.689.1	Os01g0200600	OsERF#039	Similar to Avr9/Cf-9 rapidly elicited protein 111A	-	-	-	-	GO:0005634//nucleus	GO:0003677//DNA binding;GO:0003700//transcription factor activity, sequence-specific DNA binding	GO:0006355//regulation of transcription, DNA-templated
78	MSTRG.689.1	Os01g0200400	-	Thioredoxin domain 2 containing protein	-	-	-	-	GO:0016020//membrane;GO:0016021//integral component of membrane	-	-
79	MSTRG.701.1	Os01g0202800	OsNIP1	Similar to NOD26-like membrane integral protein ZmNIP1-1	-	-	-	-	GO:0016020//membrane;GO:0016021//integral component of membrane	GO:0015267//channel activity	GO:0055085//transmembrane transport
79	MSTRG.701.1	Os01g0203300	-	Conserved hypothetical protein	-	-	-	-	-	-	-
80	MSTRG.704.1	Os01g0203900	-	Hypothetical protein	-	-	-	-	-	-	-
80	MSTRG.704.1	Os01g0203800	-	Protein of unknown function DUF641, plant domain containing protein	-	-	-	-	-	-	GO:0009639//response to red or far red light;GO:0009959//negative gravitropism
81	MSTRG.714.1	Os01g0205100	OsWD40-8	WD40 repeat-like domain containing protein	-	-	-	-	-	GO:0005515//protein binding	-
81	MSTRG.714.1	Os01g0205200	-	Pentatricopeptide repeat domain containing protein	-	-	-	-	GO:0009507//chloroplast;GO:0043231//intracellular membrane-bounded organelle	GO:0005515//protein binding;GO:0008270//zinc ion binding	GO:0009451//RNA modification;GO:0010087//phloem or xylem histogenesis;GO:0010305//leaf vascular tissue pattern formation;GO:0010588//cotyledon vascular tissue pattern formation;GO:0048366//leaf development;GO:1900865//chloroplast RNA modification
81	MSTRG.714.1	Os01g0205300	-	Similar to rho termination factor, N-terminal domain containing protein	-	-	-	-	-	-	GO:0006353//DNA-templated transcription, termination
81	MSTRG.714.1	Os01g0205401	-	Non-protein coding transcript	-	-	-	-	-	-	-
81	MSTRG.714.1	Os01g0205500	-	Similar to 60S ribosomal protein L11-2 (L16). Splice isoform 2	Genetic Information Processing	Translation	ko03010//Ribosome	K02868	GO:0005840//ribosome;GO:0022625//cytosolic large ribosomal subunit	GO:0003723//RNA binding;GO:0003735//structural constituent of ribosome	GO:0000027//ribosomal large subunit assembly;GO:0006412//translation
81	MSTRG.714.1	Os01g0205550	-	Non-protein coding transcript	-	-	-	-	-	-	-
81	MSTRG.714.1	Os01g0205700	GSK1	Similar to Shaggy-like kinase (Fragment)	Environmental Information Processing	Signal transduction	ko04075//Plant hormone signal transduction	K14502	-	GO:0004672//protein kinase activity;GO:0005524//ATP binding	GO:0006468//protein phosphorylation
81	MSTRG.714.1	Os01g0205800	-	Non-protein coding transcript	-	-	-	-	-	-	-
81	MSTRG.714.1	MSTRG.710	PCMP-E53	pentatricopeptide repeat-containing protein DOT4, chloroplastic [Oryza sativa Japonica Group]	-	-	-	-	GO:0009536//plastid	-	GO:0009451//RNA modification;GO:0009888//tissue development;GO:0010051//xylem and phloem pattern formation;GO:0048827//phyllome development;GO:0050896//response to stimulus
82	MSTRG.724.1	MSTRG.722	--	class E basic helix-loop-helix protein 22 [Oryza sativa Japonica Group]	-	-	-	-	-	-	-
82	MSTRG.724.1	Os01g0208700	PEPC-2	Similar to Phosphoenolpyruvate carboxylase (Fragment)	Metabolism;Metabolism;Metabolism;Metabolism	Global and overview maps;Global and overview maps;Carbohydrate metabolism;Energy metabolism	ko01100//Metabolic pathways;ko01200//Carbon metabolism;ko00620//Pyruvate metabolism;ko00710//Carbon fixation in photosynthetic organisms	K01595;K01595;K01595;K01595	GO:0005829//cytosol;GO:0009507//chloroplast;GO:0048046//apoplast	GO:0003824//catalytic activity;GO:0008964//phosphoenolpyruvate carboxylase activity	GO:0006099//tricarboxylic acid cycle;GO:0015977//carbon fixation;GO:0048366//leaf development
83	MSTRG.723.3	Os01g0208700	PEPC-2	Similar to Phosphoenolpyruvate carboxylase (Fragment)	Metabolism;Metabolism;Metabolism;Metabolism	Global and overview maps;Global and overview maps;Carbohydrate metabolism;Energy metabolism	ko01100//Metabolic pathways;ko01200//Carbon metabolism;ko00620//Pyruvate metabolism;ko00710//Carbon fixation in photosynthetic organisms	K01595;K01595;K01595;K01595	GO:0005829//cytosol;GO:0009507//chloroplast;GO:0048046//apoplast	GO:0003824//catalytic activity;GO:0008964//phosphoenolpyruvate carboxylase activity	GO:0006099//tricarboxylic acid cycle;GO:0015977//carbon fixation;GO:0048366//leaf development
83	MSTRG.723.3	Os01g0208800	-	Similar to Phosphoenolpyruvate carboxylase (Fragment)	-	-	-	-	-	-	-
84	MSTRG.730.1	Os01g0209150	-	Hypothetical gene	-	-	-	-	-	-	-
84	MSTRG.730.1	Os01g0209300	-	Non-protein coding transcript	-	-	-	-	-	-	-
84	MSTRG.730.1	Os01g0209000	-	Alg9-like mannosyltransferase family protein	Metabolism;Metabolism;Metabolism	Global and overview maps;Glycan biosynthesis and metabolism;Glycan biosynthesis and metabolism	ko01100//Metabolic pathways;ko00510//N-Glycan biosynthesis;ko00513//Various types of N-glycan biosynthesis	K03846;K03846;K03846	GO:0005783//endoplasmic reticulum;GO:0005789//endoplasmic reticulum membrane;GO:0016020//membrane;GO:0016021//integral component of membrane	GO:0000026//alpha-1,2-mannosyltransferase activity;GO:0000030//mannosyltransferase activity;GO:0016757//transferase activity, transferring glycosyl groups	GO:0030433//ER-associated ubiquitin-dependent protein catabolic process;GO:0097502//mannosylation
85	MSTRG.731.1	Os01g0209150	-	Hypothetical gene	-	-	-	-	-	-	-
85	MSTRG.731.1	Os01g0209300	-	Non-protein coding transcript	-	-	-	-	-	-	-
85	MSTRG.731.1	Os01g0209400	-	Nucleotide-binding, alpha-beta plait domain containing protein	-	-	-	-	-	GO:0003676//nucleic acid binding;GO:0003723//RNA binding	-
85	MSTRG.731.1	Os01g0209000	-	Alg9-like mannosyltransferase family protein	Metabolism;Metabolism;Metabolism	Global and overview maps;Glycan biosynthesis and metabolism;Glycan biosynthesis and metabolism	ko01100//Metabolic pathways;ko00510//N-Glycan biosynthesis;ko00513//Various types of N-glycan biosynthesis	K03846;K03846;K03846	GO:0005783//endoplasmic reticulum;GO:0005789//endoplasmic reticulum membrane;GO:0016020//membrane;GO:0016021//integral component of membrane	GO:0000026//alpha-1,2-mannosyltransferase activity;GO:0000030//mannosyltransferase activity;GO:0016757//transferase activity, transferring glycosyl groups	GO:0030433//ER-associated ubiquitin-dependent protein catabolic process;GO:0097502//mannosylation
86	MSTRG.742.1	Os01g0210500	-	Similar to SOUL-like protein	-	-	-	-	GO:0005774//vacuolar membrane	GO:0020037//heme binding	-
86	MSTRG.742.1	Os01g0210550	-	Hypothetical gene	-	-	-	-	-	-	-
86	MSTRG.742.1	Os01g0210600	-	Protein of unknown function DUF538 family protein	-	-	-	-	-	-	-
86	MSTRG.742.1	Os01g0210900	-	Cytochrome P450 family protein	Metabolism;Metabolism;Metabolism	Global and overview maps;Global and overview maps;Lipid metabolism	ko01100//Metabolic pathways;ko01110//Biosynthesis of secondary metabolites;ko00100//Steroid biosynthesis	K09832;K09832;K09832	GO:0016020//membrane;GO:0016021//integral component of membrane	GO:0004497//monooxygenase activity;GO:0005506//iron ion binding;GO:0016491//oxidoreductase activity;GO:0016705//oxidoreductase activity, acting on paired donors, with incorporation or reduction of molecular oxygen;GO:0020037//heme binding;GO:0046872//metal ion binding	GO:0016125//sterol metabolic process;GO:0055114//oxidation-reduction process
86	MSTRG.742.1	Os01g0210800	-	Conserved hypothetical protein	Metabolism	Global and overview maps	ko01100//Metabolic pathways	K01000	GO:0016021//integral component of membrane	GO:0008963//phospho-N-acetylmuramoyl-pentapeptide-transferase activity	-
87	MSTRG.744.1	Os01g0210500	-	Similar to SOUL-like protein	-	-	-	-	GO:0005774//vacuolar membrane	GO:0020037//heme binding	-
87	MSTRG.744.1	Os01g0210550	-	Hypothetical gene	-	-	-	-	-	-	-
87	MSTRG.744.1	Os01g0210600	-	Protein of unknown function DUF538 family protein	-	-	-	-	-	-	-
87	MSTRG.744.1	Os01g0210800	-	Conserved hypothetical protein	Metabolism	Global and overview maps	ko01100//Metabolic pathways	K01000	GO:0016021//integral component of membrane	GO:0008963//phospho-N-acetylmuramoyl-pentapeptide-transferase activity	-
88	MSTRG.755.1	Os01g0213350	-	Hypothetical gene	-	-	-	-	-	-	-
88	MSTRG.755.1	Os01g0213400	OsRFPH2-8	Zinc finger, RING/FYVE/PHD-type domain containing protein	-	-	-	-	GO:0016020//membrane;GO:0016021//integral component of membrane	GO:0008270//zinc ion binding;GO:0046872//metal ion binding	GO:0016567//protein ubiquitination
89	MSTRG.761.1	Os01g0214600	OsGELP2	Lipase, GDSL domain containing protein	-	-	-	-	-	GO:0016788//hydrolase activity, acting on ester bonds	-
89	MSTRG.761.1	Os01g0215000	OsGELP4	Lipase, GDSL domain containing protein	-	-	-	-	-	GO:0016788//hydrolase activity, acting on ester bonds	-
90	MSTRG.775.1	Os01g0219000	-	Conserved hypothetical protein	-	-	-	-	GO:0005829//cytosol	-	-
90	MSTRG.775.1	Os01g0219200	ZYGO1	F-box protein, Mediation of bouquet formation, Promotion of homolog pairing, synapsis, and crossover formation in meiosi	-	-	-	-	GO:0005634//nucleus	GO:0005515//protein binding	GO:0061458//reproductive system development
90	MSTRG.775.1	Os01g0219300	-	Conserved hypothetical protein	-	-	-	-	-	-	-
90	MSTRG.775.1	Os01g0218900	-	Zinc finger, PHD-type domain containing protein	-	-	-	-	-	GO:0046872//metal ion binding	-
91	MSTRG.781.1	Os01g0220200	-	Similar to Uncharacterized plant-specific domain TIGR01589 family protein	-	-	-	-	-	-	-
91	MSTRG.781.1	Os01g0220400	-	Hypothetical protein	-	-	-	-	-	-	-
91	MSTRG.781.1	Os01g0220500	-	Similar to predicted protein	-	-	-	-	-	-	-
92	MSTRG.799.1	Os01g0223200	OsGELP12	Lipase, GDSL domain containing protein	-	-	-	-	-	GO:0016788//hydrolase activity, acting on ester bonds	-
92	MSTRG.799.1	MSTRG.800	--	helicase-like protein [Oryza sativa Japonica Group]	-	-	-	-	GO:0043231//intracellular membrane-bounded organelle	GO:0004386//helicase activity;GO:0032550//purine ribonucleoside binding	GO:0006259//DNA metabolic process;GO:0032392//DNA geometric change
93	MSTRG.802.1	MSTRG.801	--	OSJNBa0081C01.22 [Oryza sativa Japonica Group]	-	-	-	-	-	-	-
93	MSTRG.802.1	MSTRG.803	--	OSJNBb0034G17.12 [Oryza sativa Japonica Group]	-	-	-	-	GO:0043231//intracellular membrane-bounded organelle	-	-
94	MSTRG.806.3	Os01g0223700	-	Bulb-type lectin domain domain containing protein	-	-	-	-	-	-	-
94	MSTRG.806.3	Os01g0223900	-	Serine/threonine protein kinase-related domain containing protein	-	-	-	-	GO:0005886//plasma membrane;GO:0016020//membrane;GO:0016021//integral component of membrane	GO:0000166//nucleotide binding;GO:0004672//protein kinase activity;GO:0004674//protein serine/threonine kinase activity;GO:0005524//ATP binding;GO:0016301//kinase activity;GO:0016740//transferase activity	GO:0006468//protein phosphorylation;GO:0016310//phosphorylation;GO:0048544//recognition of pollen
94	MSTRG.806.3	Os01g0223600	-	Similar to Pto kinase interactor 1-like protein	-	-	-	-	GO:0016021//integral component of membrane	GO:0004672//protein kinase activity;GO:0005524//ATP binding	GO:0006468//protein phosphorylation
94	MSTRG.806.3	Os01g0223800	-	Hypothetical conserved gene	-	-	-	-	GO:0005886//plasma membrane;GO:0016020//membrane;GO:0016021//integral component of membrane	GO:0000166//nucleotide binding;GO:0004672//protein kinase activity;GO:0004674//protein serine/threonine kinase activity;GO:0005524//ATP binding;GO:0016301//kinase activity;GO:0016740//transferase activity	GO:0006468//protein phosphorylation;GO:0016310//phosphorylation;GO:0048544//recognition of pollen
95	MSTRG.820.1	Os01g0225600	Lea14A	Similar to Dehydrin	-	-	-	-	GO:0005829//cytosol	-	GO:0009269//response to desiccation
95	MSTRG.820.1	Os01g0225700	-	Hypothetical gene	-	-	-	-	-	-	-
95	MSTRG.820.1	MSTRG.823	--	OSJNBb0034G17.12 [Oryza sativa Japonica Group]	-	-	-	-	GO:0043231//intracellular membrane-bounded organelle	-	GO:0010466//negative regulation of peptidase activity
95	MSTRG.820.1	Os01g0225500	-	Similar to 3-methyl-2-oxobutanoate hydroxymethyltransferase	Metabolism;Metabolism;Metabolism	Global and overview maps;Global and overview maps;Metabolism of cofactors and vitamins	ko01100//Metabolic pathways;ko01110//Biosynthesis of secondary metabolites;ko00770//Pantothenate and CoA biosynthesis	K00606;K00606;K00606	GO:0005739//mitochondrion	GO:0000287//magnesium ion binding;GO:0003824//catalytic activity;GO:0003864//3-methyl-2-oxobutanoate hydroxymethyltransferase activity;GO:0008168//methyltransferase activity;GO:0016740//transferase activity;GO:0046872//metal ion binding	GO:0015940//pantothenate biosynthetic process
96	MSTRG.832.4	Os01g0227250	-	Hypothetical gene	-	-	-	-	-	-	-
96	MSTRG.832.4	Os01g0227350	-	Hypothetical protein	-	-	-	-	-	-	-
96	MSTRG.832.4	Os01g0227100	NYC1	Chlorophyll b reductase, Leaf senescenc	Metabolism;Metabolism;Metabolism	Global and overview maps;Global and overview maps;Metabolism of cofactors and vitamins	ko01100//Metabolic pathways;ko01110//Biosynthesis of secondary metabolites;ko00860//Porphyrin and chlorophyll metabolism	K13606;K13606;K13606	GO:0009507//chloroplast;GO:0009535//chloroplast thylakoid membrane;GO:0009536//plastid;GO:0009579//thylakoid;GO:0016020//membrane;GO:0016021//integral component of membrane;GO:0042170//plastid membrane	GO:0016491//oxidoreductase activity;GO:0034256//chlorophyll(ide) b reductase activity	GO:0010304//PSII associated light-harvesting complex II catabolic process;GO:0015996//chlorophyll catabolic process;GO:0055114//oxidation-reduction process
96	MSTRG.832.4	Os01g0227300	OsRab7B1	Similar to RAB7D	Cellular Processes;Cellular Processes	Transport and catabolism;Transport and catabolism	ko04144//Endocytosis;ko04145//Phagosome	K07897;K07897	GO:0005774//vacuolar membrane;GO:0012505//endomembrane system	GO:0003924//GTPase activity;GO:0005525//GTP binding	GO:0006886//intracellular protein transport;GO:0032482//Rab protein signal transduction
97	MSTRG.832.5	Os01g0227250	-	Hypothetical gene	-	-	-	-	-	-	-
97	MSTRG.832.5	Os01g0227350	-	Hypothetical protein	-	-	-	-	-	-	-
97	MSTRG.832.5	Os01g0227100	NYC1	Chlorophyll b reductase, Leaf senescenc	Metabolism;Metabolism;Metabolism	Global and overview maps;Global and overview maps;Metabolism of cofactors and vitamins	ko01100//Metabolic pathways;ko01110//Biosynthesis of secondary metabolites;ko00860//Porphyrin and chlorophyll metabolism	K13606;K13606;K13606	GO:0009507//chloroplast;GO:0009535//chloroplast thylakoid membrane;GO:0009536//plastid;GO:0009579//thylakoid;GO:0016020//membrane;GO:0016021//integral component of membrane;GO:0042170//plastid membrane	GO:0016491//oxidoreductase activity;GO:0034256//chlorophyll(ide) b reductase activity	GO:0010304//PSII associated light-harvesting complex II catabolic process;GO:0015996//chlorophyll catabolic process;GO:0055114//oxidation-reduction process
97	MSTRG.832.5	Os01g0227300	OsRab7B1	Similar to RAB7D	Cellular Processes;Cellular Processes	Transport and catabolism;Transport and catabolism	ko04144//Endocytosis;ko04145//Phagosome	K07897;K07897	GO:0005774//vacuolar membrane;GO:0012505//endomembrane system	GO:0003924//GTPase activity;GO:0005525//GTP binding	GO:0006886//intracellular protein transport;GO:0032482//Rab protein signal transduction
98	MSTRG.835.1	Os01g0227200	-	Similar to Somatic embryogenesis receptor kinase-like protein	-	-	-	-	GO:0005886//plasma membrane;GO:0016020//membrane;GO:0016021//integral component of membrane	GO:0004672//protein kinase activity;GO:0004675//transmembrane receptor protein serine/threonine kinase activity;GO:0005524//ATP binding	GO:0006468//protein phosphorylation;GO:0007178//transmembrane receptor protein serine/threonine kinase signaling pathway
98	MSTRG.835.1	Os01g0227250	-	Hypothetical gene	-	-	-	-	-	-	-
98	MSTRG.835.1	Os01g0227350	-	Hypothetical protein	-	-	-	-	-	-	-
98	MSTRG.835.1	Os01g0227400	-	Similar to Cytochrome P450 71A1 (EC 1.14.-.-) (CYPLXXIA1) (ARP-2)	-	-	-	-	GO:0016020//membrane	GO:0004497//monooxygenase activity;GO:0005506//iron ion binding;GO:0016491//oxidoreductase activity;GO:0016705//oxidoreductase activity, acting on paired donors, with incorporation or reduction of molecular oxygen;GO:0016709//oxidoreductase activity, acting on paired donors, with incorporation or reduction of molecular oxygen, NAD(P)H as one donor, and incorporation of one atom of oxygen;GO:00200…	GO:0055114//oxidation-reduction process
98	MSTRG.835.1	Os01g0227500	-	Cytochrome P450 family protein	-	-	-	-	GO:0016020//membrane;GO:0016021//integral component of membrane	GO:0004497//monooxygenase activity;GO:0005506//iron ion binding;GO:0016491//oxidoreductase activity;GO:0016705//oxidoreductase activity, acting on paired donors, with incorporation or reduction of molecular oxygen;GO:0016709//oxidoreductase activity, acting on paired donors, with incorporation or reduction of molecular oxygen, NAD(P)H as one donor, and incorporation of one atom of oxygen;GO:00200…	GO:0055114//oxidation-reduction process
99	MSTRG.838.1	Os01g0227350	-	Hypothetical protein	-	-	-	-	-	-	-
99	MSTRG.838.1	Os01g0227400	-	Similar to Cytochrome P450 71A1 (EC 1.14.-.-) (CYPLXXIA1) (ARP-2)	-	-	-	-	GO:0016020//membrane	GO:0004497//monooxygenase activity;GO:0005506//iron ion binding;GO:0016491//oxidoreductase activity;GO:0016705//oxidoreductase activity, acting on paired donors, with incorporation or reduction of molecular oxygen;GO:0016709//oxidoreductase activity, acting on paired donors, with incorporation or reduction of molecular oxygen, NAD(P)H as one donor, and incorporation of one atom of oxygen;GO:00200…	GO:0055114//oxidation-reduction process
99	MSTRG.838.1	MSTRG.839	--	Os01g0227600 [Oryza sativa Japonica Group]	-	-	-	-	-	-	-
99	MSTRG.838.1	Os01g0227300	OsRab7B1	Similar to RAB7D	Cellular Processes;Cellular Processes	Transport and catabolism;Transport and catabolism	ko04144//Endocytosis;ko04145//Phagosome	K07897;K07897	GO:0005774//vacuolar membrane;GO:0012505//endomembrane system	GO:0003924//GTPase activity;GO:0005525//GTP binding	GO:0006886//intracellular protein transport;GO:0032482//Rab protein signal transduction
99	MSTRG.838.1	Os01g0227700	-	Cytochrome P450 family protein	-	-	-	-	GO:0016020//membrane;GO:0016021//integral component of membrane	GO:0004497//monooxygenase activity;GO:0005506//iron ion binding;GO:0016491//oxidoreductase activity;GO:0016705//oxidoreductase activity, acting on paired donors, with incorporation or reduction of molecular oxygen;GO:0016709//oxidoreductase activity, acting on paired donors, with incorporation or reduction of molecular oxygen, NAD(P)H as one donor, and incorporation of one atom of oxygen;GO:00200…	GO:0055114//oxidation-reduction process
100	MSTRG.842.1	Os01g0227800	-	Similar to cDNA, clone: J075083L18, full insert sequence	-	-	-	-	GO:0016020//membrane;GO:0016021//integral component of membrane	GO:0004497//monooxygenase activity;GO:0005506//iron ion binding;GO:0016491//oxidoreductase activity;GO:0016705//oxidoreductase activity, acting on paired donors, with incorporation or reduction of molecular oxygen;GO:0016709//oxidoreductase activity, acting on paired donors, with incorporation or reduction of molecular oxygen, NAD(P)H as one donor, and incorporation of one atom of oxygen;GO:00200…	GO:0055114//oxidation-reduction process
100	MSTRG.842.1	MSTRG.843	At3g47570	Os01g0228200 [Oryza sativa Japonica Group]	-	-	-	-	GO:0031224//intrinsic component of membrane;GO:0043231//intracellular membrane-bounded organelle	GO:0004672//protein kinase activity;GO:0032550//purine ribonucleoside binding	GO:0006464//cellular protein modification process
100	MSTRG.842.1	Os01g0228300	-	Mpv17/PMP22 family protein	Cellular Processes	Transport and catabolism	ko04146//Peroxisome	K13348	GO:0005737//cytoplasm;GO:0016020//membrane;GO:0016021//integral component of membrane	-	-
100	MSTRG.842.1	Os01g0228400	-	Pentatricopeptide repeat domain containing protein	-	-	-	-	GO:0005739//mitochondrion	GO:0005515//protein binding	-
100	MSTRG.842.1	Os01g0228450	-	Hypothetical protein	-	-	-	-	-	-	-
101	MSTRG.850.1	Os01g0228500	-	Harpin-induced 1 domain containing protein	-	-	-	-	GO:0016020//membrane;GO:0016021//integral component of membrane	-	-
101	MSTRG.850.1	Os01g0228600	OsHPR2-1	Cytosolic hydroxypyruvate reductase, NADPH-dependent HPR, Photorespiratory metabolis	Metabolism;Metabolism;Metabolism;Metabolism;Metabolism	Global and overview maps;Global and overview maps;Global and overview maps;Carbohydrate metabolism;Amino acid metabolism	ko01100//Metabolic pathways;ko01110//Biosynthesis of secondary metabolites;ko01200//Carbon metabolism;ko00630//Glyoxylate and dicarboxylate metabolism;ko00260//Glycine, serine and threonine metabolism	K15919;K15919;K15919;K15919;K15919	GO:0005829//cytosol	GO:0016491//oxidoreductase activity;GO:0016616//oxidoreductase activity, acting on the CH-OH group of donors, NAD or NADP as acceptor;GO:0016618//hydroxypyruvate reductase activity;GO:0030267//glyoxylate reductase (NADP) activity;GO:0047995//hydroxyphenylpyruvate reductase activity;GO:0051287//NAD binding	GO:0009854//oxidative photosynthetic carbon pathway;GO:0055114//oxidation-reduction process
101	MSTRG.850.1	Os01g0228901	-	Hypothetical gene	-	-	-	-	-	-	-
102	MSTRG.852.1	Os01g0228901	-	Hypothetical gene	-	-	-	-	-	-	-
102	MSTRG.852.1	Os01g0229000	-	Similar to Transcription factor myb	-	-	-	-	GO:0005634//nucleus	-	-
102	MSTRG.852.1	Os01g0229100	-	Similar to Eukaryotic translation initiation factor 3 subunit 6-interacting protein	-	-	-	-	GO:0005737//cytoplasm;GO:0005852//eukaryotic translation initiation factor 3 complex;GO:0016282//eukaryotic 43S preinitiation complex;GO:0033290//eukaryotic 48S preinitiation complex	GO:0003743//translation initiation factor activity	GO:0001732//formation of cytoplasmic translation initiation complex;GO:0002183//cytoplasmic translational initiation;GO:0006412//translation;GO:0006413//translational initiation
103	MSTRG.858.1	Os01g0229500	-	Thioesterase superfamily domain containing protein	-	-	-	-	-	GO:0047617//acyl-CoA hydrolase activity	-
103	MSTRG.858.1	Os01g0229800	-	Similar to Vegetative storage protein PNI288	-	-	-	-	-	GO:0003824//catalytic activity	GO:0009116//nucleoside metabolic process
103	MSTRG.858.1	Os01g0229600	-	Conserved hypothetical protein	-	-	-	-	GO:0016020//membrane;GO:0016021//integral component of membrane	GO:0047617//acyl-CoA hydrolase activity	-
104	MSTRG.860.1	Os01g0229700	OsWD40-9	WD40 repeat domain containing protein	-	-	-	-	-	GO:0004842//ubiquitin-protein transferase activity;GO:0005515//protein binding	GO:0016567//protein ubiquitination
104	MSTRG.860.1	Os01g0229600	-	Conserved hypothetical protein	-	-	-	-	GO:0016020//membrane;GO:0016021//integral component of membrane	GO:0047617//acyl-CoA hydrolase activity	-
105	MSTRG.862.1	MSTRG.865	--	OSJNBa0093P23.6 [Oryza sativa Japonica Group]	-	-	-	-	-	-	-
106	MSTRG.863.1	MSTRG.865	--	OSJNBa0093P23.6 [Oryza sativa Japonica Group]	-	-	-	-	-	-	-
106	MSTRG.863.1	Os01g0230200	OsbHLH074	Basic helix-loop-helix dimerisation region bHLH domain containing protein	-	-	-	-	GO:0005634//nucleus	GO:0001228//transcriptional activator activity, RNA polymerase II transcription regulatory region sequence-specific binding;GO:0046983//protein dimerization activity	GO:0006355//regulation of transcription, DNA-templated;GO:0045944//positive regulation of transcription from RNA polymerase II promoter
107	MSTRG.878.1	Os01g0232300	TRZ3	Similar to TRZ3 (TRNASE Z 3); 3'-tRNA processing endoribonuclease/ catalytic	Genetic Information Processing	Translation	ko03013//RNA transport	K00784	GO:0005739//mitochondrion	-	GO:0008033//tRNA processing;GO:0072684//mitochondrial tRNA 3'-trailer cleavage, endonucleolytic
107	MSTRG.878.1	Os01g0232400	-	Similar to VHS1 protein (Fragment)	Genetic Information Processing	Translation	ko03013//RNA transport	K00784	GO:0005802//trans-Golgi network;GO:0016020//membrane;GO:0030136//clathrin-coated vesicle	GO:0030276//clathrin binding	GO:0006886//intracellular protein transport;GO:0035652//cargo loading into clathrin-coated vesicle
107	MSTRG.878.1	Os01g0232450	-	Conserved hypothetical protein	-	-	-	-	-	-	-
107	MSTRG.878.1	Os01g0232550	-	Hypothetical conserved gene	-	-	-	-	-	-	-
107	MSTRG.878.1	Os01g0232700	-	Similar to Histidinol dehydrogenase, chloroplast precursor (EC 1.1.1.23) (HDH). Splice isoform 2	Metabolism;Metabolism;Metabolism;Metabolism	Global and overview maps;Global and overview maps;Global and overview maps;Amino acid metabolism	ko01100//Metabolic pathways;ko01110//Biosynthesis of secondary metabolites;ko01230//Biosynthesis of amino acids;ko00340//Histidine metabolism	K00013;K00013;K00013;K00013	GO:0005737//cytoplasm;GO:0005829//cytosol;GO:0009507//chloroplast;GO:0009536//plastid;GO:0009570//chloroplast stroma	GO:0004399//histidinol dehydrogenase activity;GO:0008270//zinc ion binding;GO:0016491//oxidoreductase activity;GO:0046872//metal ion binding;GO:0051287//NAD binding	GO:0000105//histidine biosynthetic process;GO:0008652//cellular amino acid biosynthetic process;GO:0009411//response to UV;GO:0009555//pollen development;GO:0055114//oxidation-reduction process
108	MSTRG.891.1	Os01g0234900	OsRFPHC-14	Similar to Ubiquitin ligase SINAT5 (EC 6.3.2.-) (Seven in absentia homolog 5). Splice isoform 2	Genetic Information Processing	Folding, sorting and degradation	ko04120//Ubiquitin mediated proteolysis	K04506	GO:0005634//nucleus;GO:0005737//cytoplasm	GO:0005515//protein binding;GO:0008270//zinc ion binding;GO:0016874//ligase activity;GO:0046872//metal ion binding;GO:0061630//ubiquitin protein ligase activity	GO:0006511//ubiquitin-dependent protein catabolic process;GO:0007275//multicellular organism development;GO:0016567//protein ubiquitination
108	MSTRG.891.1	Os01g0235100	-	Similar to predicted protein	-	-	-	-	GO:0009507//chloroplast;GO:0009535//chloroplast thylakoid membrane	-	-
108	MSTRG.891.1	Os01g0235325	-	Hypothetical protein	-	-	-	-	-	-	-
108	MSTRG.891.1	Os01g0235350	-	Conserved hypothetical protein	-	-	-	-	GO:0016020//membrane;GO:0016021//integral component of membrane	-	-
108	MSTRG.891.1	Os01g0235300	-	SOUL haem-binding protein domain containing protein	-	-	-	-	-	GO:0020037//heme binding	-
109	MSTRG.898.1	Os01g0235800	-	K Homology domain containing protein	-	-	-	-	-	GO:0003676//nucleic acid binding;GO:0003723//RNA binding	-
110	MSTRG.904.1	Os01g0235800	-	K Homology domain containing protein	-	-	-	-	-	GO:0003676//nucleic acid binding;GO:0003723//RNA binding	-
110	MSTRG.904.1	Os01g0235850	-	Hypothetical protein	-	-	-	-	GO:0016020//membrane;GO:0016021//integral component of membrane	-	-
110	MSTRG.904.1	Os01g0235900	OsGRL1	Thioredoxin fold domain containing protein	-	-	-	-	GO:0005623//cell;GO:0005884//actin filament	GO:0009055//electron carrier activity;GO:0015035//protein disulfide oxidoreductase activity	GO:0009902//chloroplast relocation;GO:0022900//electron transport chain;GO:0045454//cell redox homeostasis;GO:0051017//actin filament bundle assembly;GO:0055114//oxidation-reduction process
111	MSTRG.905.1	Os01g0235850	-	Hypothetical protein	-	-	-	-	GO:0016020//membrane;GO:0016021//integral component of membrane	-	-
111	MSTRG.905.1	Os01g0235900	OsGRL1	Thioredoxin fold domain containing protein	-	-	-	-	GO:0005623//cell;GO:0005884//actin filament	GO:0009055//electron carrier activity;GO:0015035//protein disulfide oxidoreductase activity	GO:0009902//chloroplast relocation;GO:0022900//electron transport chain;GO:0045454//cell redox homeostasis;GO:0051017//actin filament bundle assembly;GO:0055114//oxidation-reduction process
112	MSTRG.913.1	Os01g0236700	-	Octicosapeptide/Phox/Bem1p domain containing protein	-	-	-	-	GO:0005634//nucleus	GO:0003677//DNA binding;GO:0005515//protein binding	-
112	MSTRG.913.1	Os01g0236900	-	Hypothetical protein	-	-	-	-	-	-	-
112	MSTRG.913.1	Os01g0237000	-	Uncharacterised protein family UPF0497, trans-membrane plant subgroup domain containing protein	-	-	-	-	GO:0005886//plasma membrane;GO:0016020//membrane;GO:0016021//integral component of membrane	GO:0051539//4 iron, 4 sulfur cluster binding	-
113	MSTRG.916.2	Os01g0236800	OsBamy4	Similar to predicted protein	Metabolism;Metabolism;Metabolism	Global and overview maps;Global and overview maps;Carbohydrate metabolism	ko01100//Metabolic pathways;ko01110//Biosynthesis of secondary metabolites;ko00500//Starch and sucrose metabolism	K01177;K01177;K01177	-	GO:0016161//beta-amylase activity;GO:0016787//hydrolase activity;GO:0016798//hydrolase activity, acting on glycosyl bonds	GO:0000272//polysaccharide catabolic process;GO:0005975//carbohydrate metabolic process;GO:0008152//metabolic process
113	MSTRG.916.2	Os01g0236900	-	Hypothetical protein	-	-	-	-	-	-	-
113	MSTRG.916.2	Os01g0237000	-	Uncharacterised protein family UPF0497, trans-membrane plant subgroup domain containing protein	-	-	-	-	GO:0005886//plasma membrane;GO:0016020//membrane;GO:0016021//integral component of membrane	GO:0051539//4 iron, 4 sulfur cluster binding	-
113	MSTRG.916.2	Os01g0237200	-	Conserved hypothetical protein	Genetic Information Processing	Translation	ko03010//Ribosome	K02957	GO:0005840//ribosome;GO:0022627//cytosolic small ribosomal subunit	GO:0003735//structural constituent of ribosome	GO:0006412//translation
114	MSTRG.927.1	Os01g0239100	OsDjB1	Heat shock protein DnaJ family protein	-	-	-	-	GO:0005829//cytosol	GO:0051082//unfolded protein binding;GO:0051087//chaperone binding	GO:0006457//protein folding;GO:0051085//chaperone mediated protein folding requiring cofactor
114	MSTRG.927.1	Os01g0239150	-	Hypothetical protein	-	-	-	-	GO:0016020//membrane;GO:0016021//integral component of membrane	-	-
115	MSTRG.930.1	Os01g0239200	OsTPT1	Similar to Phophate translocator (Fragment)	-	-	-	-	GO:0005794//Golgi apparatus;GO:0009507//chloroplast;GO:0009536//plastid;GO:0016020//membrane;GO:0016021//integral component of membrane;GO:0031969//chloroplast membrane	GO:0015297//antiporter activity;GO:0022857//transmembrane transporter activity	GO:0008643//carbohydrate transport;GO:0055085//transmembrane transport
115	MSTRG.930.1	Os01g0239300	-	Conserved hypothetical protein	-	-	-	-	-	-	-
116	MSTRG.933.1	Os01g0240600	-	Hypothetical conserved gene	-	-	-	-	-	-	-
117	MSTRG.934.1	Os01g0240600	-	Hypothetical conserved gene	-	-	-	-	-	-	-
118	MSTRG.954.1	Os01g0246400	-	Similar to Low molecular mass early light-inducible protein HV90, chloroplast precursor (ELIP)	-	-	-	-	GO:0009535//chloroplast thylakoid membrane	-	-
118	MSTRG.954.1	Os01g0246601	-	Protein of unknown function DUF296 domain containing protein	-	-	-	-	GO:0005634//nucleus	GO:0003680//AT DNA binding;GO:0003700//transcription factor activity, sequence-specific DNA binding	GO:0006355//regulation of transcription, DNA-templated;GO:0010228//vegetative to reproductive phase transition of meristem
118	MSTRG.954.1	Os01g0246200	-	Similar to TCP-domain protein	-	-	-	-	GO:0005634//nucleus	GO:0003700//transcription factor activity, sequence-specific DNA binding;GO:0043565//sequence-specific DNA binding	GO:0006355//regulation of transcription, DNA-templated;GO:0048831//regulation of shoot system development;GO:2000032//regulation of secondary shoot formation
119	MSTRG.962.1	Os01g0248450	-	Non-protein coding transcript	-	-	-	-	-	-	-
119	MSTRG.962.1	Os01g0248600	PSF2	GINS complex, Psf2 component family protein	-	-	-	-	GO:0000811//GINS complex;GO:0005634//nucleus;GO:0031298//replication fork protection complex	GO:0043138//3'-5' DNA helicase activity	GO:0000727//double-strand break repair via break-induced replication;GO:0006260//DNA replication;GO:0032508//DNA duplex unwinding
119	MSTRG.962.1	Os01g0248400	-	Similar to Isocitrate dehydrogenase (Fragment)	Metabolism;Metabolism;Metabolism;Metabolism;Metabolism;Cellular Processes;Metabolism;Metabolism	Global and overview maps;Global and overview maps;Global and overview maps;Global and overview maps;Metabolism of other amino acids;Transport and catabolism;Global and overview maps;Carbohydrate metabolism	ko01100//Metabolic pathways;ko01110//Biosynthesis of secondary metabolites;ko01200//Carbon metabolism;ko01230//Biosynthesis of amino acids;ko00480//Glutathione metabolism;ko04146//Peroxisome;ko01210//2-Oxocarboxylic acid metabolism;ko00020//Citrate cycle (TCA cycle)	K00031;K00031;K00031;K00031;K00031;K00031;K00031;K00031	GO:0005739//mitochondrion	GO:0000287//magnesium ion binding;GO:0004450//isocitrate dehydrogenase (NADP+) activity;GO:0016491//oxidoreductase activity;GO:0016616//oxidoreductase activity, acting on the CH-OH group of donors, NAD or NADP as acceptor;GO:0042803//protein homodimerization activity;GO:0046872//metal ion binding;GO:0051287//NAD binding	GO:0006099//tricarboxylic acid cycle;GO:0006102//isocitrate metabolic process;GO:0006739//NADP metabolic process;GO:0055114//oxidation-reduction process
120	MSTRG.972.5	Os01g0251100	-	Similar to 50S ribosomal protein L3-2, chloroplast precursor	Genetic Information Processing	Translation	ko03010//Ribosome	K02906	GO:0005739//mitochondrion;GO:0005762//mitochondrial large ribosomal subunit;GO:0005840//ribosome	GO:0003735//structural constituent of ribosome	GO:0006412//translation
120	MSTRG.972.5	Os01g0251400	-	Conserved hypothetical protein	-	-	-	-	-	-	-
121	MSTRG.976.1	Os01g0252100	OsSKgamma	Similar to Glycogen synthase kinase-3 homolog MsK-3 (EC 2.7.1.-)	-	-	-	-	GO:0005737//cytoplasm;GO:0005829//cytosol	GO:0000166//nucleotide binding;GO:0004672//protein kinase activity;GO:0004674//protein serine/threonine kinase activity;GO:0005524//ATP binding	GO:0006468//protein phosphorylation;GO:0007165//signal transduction
121	MSTRG.976.1	Os01g0252150	-	Hypothetical protein	-	-	-	-	-	-	-
121	MSTRG.976.1	Os01g0252300	-	Conserved hypothetical protein	-	-	-	-	-	-	-
121	MSTRG.976.1	Os01g0252600	-	Similar to predicted protein	-	-	-	-	-	-	-
121	MSTRG.976.1	Os01g0252400	-	Hypothetical gene	-	-	-	-	-	-	-
122	MSTRG.982.1	Os01g0253000	-	Similar to LpimPth3	-	-	-	-	GO:0005886//plasma membrane;GO:0009506//plasmodesma;GO:0016020//membrane;GO:0016021//integral component of membrane	GO:0000166//nucleotide binding;GO:0004672//protein kinase activity;GO:0004674//protein serine/threonine kinase activity;GO:0005524//ATP binding	GO:0006468//protein phosphorylation;GO:0046777//protein autophosphorylation
122	MSTRG.982.1	Os01g0253050	-	Conserved hypothetical protein	-	-	-	-	-	-	-
122	MSTRG.982.1	Os01g0253100	-	Similar to Avr9/Cf-9 induced kinase 1	-	-	-	-	GO:0005886//plasma membrane;GO:0016020//membrane;GO:0016021//integral component of membrane	GO:0004672//protein kinase activity;GO:0004675//transmembrane receptor protein serine/threonine kinase activity;GO:0005524//ATP binding	GO:0006468//protein phosphorylation;GO:0007178//transmembrane receptor protein serine/threonine kinase signaling pathway
123	MSTRG.986.1	Os01g0253000	-	Similar to LpimPth3	-	-	-	-	GO:0005886//plasma membrane;GO:0009506//plasmodesma;GO:0016020//membrane;GO:0016021//integral component of membrane	GO:0000166//nucleotide binding;GO:0004672//protein kinase activity;GO:0004674//protein serine/threonine kinase activity;GO:0005524//ATP binding	GO:0006468//protein phosphorylation;GO:0046777//protein autophosphorylation
123	MSTRG.986.1	Os01g0253050	-	Conserved hypothetical protein	-	-	-	-	-	-	-
123	MSTRG.986.1	Os01g0253200	-	Similar to pectinesterase inhibitor domain containing protein	-	-	-	-	-	GO:0004857//enzyme inhibitor activity;GO:0030599//pectinesterase activity;GO:0046910//pectinesterase inhibitor activity	GO:0043086//negative regulation of catalytic activity
123	MSTRG.986.1	Os01g0253300	rImpa1a	Importin alpha-1a subunit	-	-	-	-	GO:0005634//nucleus;GO:0005643//nuclear pore;GO:0005654//nucleoplasm;GO:0005737//cytoplasm;GO:0005829//cytosol;GO:0048471//perinuclear region of cytoplasm	GO:0005515//protein binding;GO:0008139//nuclear localization sequence binding;GO:0008565//protein transporter activity;GO:0061608//nuclear import signal receptor activity	GO:0006606//protein import into nucleus;GO:0006607//NLS-bearing protein import into nucleus;GO:0015031//protein transport;GO:0016032//viral process
124	MSTRG.1008.1	Os01g0257900	-	Hypothetical protein	-	-	-	-	-	-	-
124	MSTRG.1008.1	Os01g0258000	-	Conserved hypothetical protein	-	-	-	-	-	-	-
125	MSTRG.1018.2	Os01g0259900	SAD1L	Conserved hypothetical protein	-	-	-	-	-	-	-
125	MSTRG.1018.2	Os01g0259966	-	Non-protein coding transcript	-	-	-	-	-	-	-
125	MSTRG.1018.2	Os01g0260000	-	Protein prenyltransferase domain containing protein	-	-	-	-	GO:0016021//integral component of membrane	GO:0005515//protein binding	GO:0009451//RNA modification
125	MSTRG.1018.2	Os01g0260100	-	Similar to Kinesin heavy chain (Fragment)	-	-	-	-	-	GO:0003777//microtubule motor activity;GO:0005524//ATP binding;GO:0008017//microtubule binding	GO:0007018//microtubule-based movement
125	MSTRG.1018.2	MSTRG.1016	--	Os01g0255700, partial [Oryza sativa Japonica Group]	-	-	-	-	-	-	-
126	MSTRG.1020.1	Os01g0260100	-	Similar to Kinesin heavy chain (Fragment)	-	-	-	-	-	GO:0003777//microtubule motor activity;GO:0005524//ATP binding;GO:0008017//microtubule binding	GO:0007018//microtubule-based movement
126	MSTRG.1020.1	Os01g0260500	-	Hypothetical conserved gene	-	-	-	-	-	GO:0005515//protein binding;GO:0043531//ADP binding	-
127	MSTRG.1039.1	Os01g0263300	atp6	Similar to Peroxidase 72 precursor (EC 1.11.1.7) (Atperox P72) (PRXR8) (ATP6a)	Metabolism;Metabolism;Metabolism	Global and overview maps;Global and overview maps;Biosynthesis of other secondary metabolites	ko01100//Metabolic pathways;ko01110//Biosynthesis of secondary metabolites;ko00940//Phenylpropanoid biosynthesis	K00430;K00430;K00430	GO:0005576//extracellular region	GO:0004601//peroxidase activity;GO:0016491//oxidoreductase activity;GO:0020037//heme binding;GO:0046872//metal ion binding	GO:0006979//response to oxidative stress;GO:0042744//hydrogen peroxide catabolic process;GO:0055114//oxidation-reduction process;GO:0098869//cellular oxidant detoxification
127	MSTRG.1039.1	Os01g0263400	-	Pentatricopeptide repeat domain containing protein	-	-	-	-	GO:0005739//mitochondrion	GO:0005515//protein binding	-
127	MSTRG.1039.1	Os01g0263600	Du1L	U5 snRNP-associated 102 kDa protein (U5-102 kDa protein)	Genetic Information Processing	Transcription	ko03040//Spliceosome	K12855	GO:0046540//U4/U6 x U5 tri-snRNP complex;GO:0071013//catalytic step 2 spliceosome	GO:0005515//protein binding	GO:0000244//spliceosomal tri-snRNP complex assembly;GO:0000398//mRNA splicing, via spliceosome;GO:0006396//RNA processing;GO:0080188//RNA-directed DNA methylation;GO:2000630//positive regulation of miRNA metabolic process;GO:2000636//positive regulation of primary miRNA processing
128	MSTRG.1038.2	Os01g0263300	atp6	Similar to Peroxidase 72 precursor (EC 1.11.1.7) (Atperox P72) (PRXR8) (ATP6a)	Metabolism;Metabolism;Metabolism	Global and overview maps;Global and overview maps;Biosynthesis of other secondary metabolites	ko01100//Metabolic pathways;ko01110//Biosynthesis of secondary metabolites;ko00940//Phenylpropanoid biosynthesis	K00430;K00430;K00430	GO:0005576//extracellular region	GO:0004601//peroxidase activity;GO:0016491//oxidoreductase activity;GO:0020037//heme binding;GO:0046872//metal ion binding	GO:0006979//response to oxidative stress;GO:0042744//hydrogen peroxide catabolic process;GO:0055114//oxidation-reduction process;GO:0098869//cellular oxidant detoxification
128	MSTRG.1038.2	Os01g0263400	-	Pentatricopeptide repeat domain containing protein	-	-	-	-	GO:0005739//mitochondrion	GO:0005515//protein binding	-
128	MSTRG.1038.2	Os01g0263600	Du1L	U5 snRNP-associated 102 kDa protein (U5-102 kDa protein)	Genetic Information Processing	Transcription	ko03040//Spliceosome	K12855	GO:0046540//U4/U6 x U5 tri-snRNP complex;GO:0071013//catalytic step 2 spliceosome	GO:0005515//protein binding	GO:0000244//spliceosomal tri-snRNP complex assembly;GO:0000398//mRNA splicing, via spliceosome;GO:0006396//RNA processing;GO:0080188//RNA-directed DNA methylation;GO:2000630//positive regulation of miRNA metabolic process;GO:2000636//positive regulation of primary miRNA processing
129	MSTRG.1052.3	Os01g0265700	-	Conserved hypothetical protein	-	-	-	-	-	-	-
130	MSTRG.1056.1	Os01g0266200	-	Conserved hypothetical protein	-	-	-	-	-	-	-
130	MSTRG.1056.1	Os01g0266400	-	Conserved hypothetical protein	-	-	-	-	-	-	-
130	MSTRG.1056.1	Os01g0266500	-	Phenazine biosynthesis PhzC/PhzF protein family protein	-	-	-	-	-	GO:0003824//catalytic activity	GO:0009058//biosynthetic process
131	MSTRG.1068.1	Os01g0267800	OsRLCK29	Serine/threonine protein kinase domain containing protein	-	-	-	-	GO:0005886//plasma membrane	GO:0000166//nucleotide binding;GO:0004672//protein kinase activity;GO:0004674//protein serine/threonine kinase activity;GO:0004675//transmembrane receptor protein serine/threonine kinase activity;GO:0005524//ATP binding	GO:0006468//protein phosphorylation;GO:0007178//transmembrane receptor protein serine/threonine kinase signaling pathway
131	MSTRG.1068.1	Os01g0268000	-	Hypothetical protein	-	-	-	-	-	-	-
131	MSTRG.1068.1	Os01g0268100	OsZIFL1	Similar to Major facilitator superfamily antiporter	-	-	-	-	GO:0016021//integral component of membrane	-	GO:0055085//transmembrane transport
131	MSTRG.1068.1	Os01g0268201	-	Non-protein coding transcript	-	-	-	-	-	-	-
132	MSTRG.1072.1	Os01g0268300	-	Similar to DNA gyrase B subunit	-	-	-	-	GO:0005694//chromosome;GO:0005739//mitochondrion;GO:0009507//chloroplast;GO:0009536//plastid	GO:0000166//nucleotide binding;GO:0003677//DNA binding;GO:0003916//DNA topoisomerase activity;GO:0003918//DNA topoisomerase type II (ATP-hydrolyzing) activity;GO:0005524//ATP binding;GO:0016853//isomerase activity;GO:0046872//metal ion binding	GO:0006265//DNA topological change
132	MSTRG.1072.1	Os01g0268600	-	Glycoside hydrolase, family 31 protein	-	-	-	-	-	GO:0003824//catalytic activity;GO:0004553//hydrolase activity, hydrolyzing O-glycosyl compounds;GO:0016787//hydrolase activity;GO:0016798//hydrolase activity, acting on glycosyl bonds;GO:0030246//carbohydrate binding	GO:0005975//carbohydrate metabolic process;GO:0008152//metabolic process
132	MSTRG.1072.1	Os01g0268700	OsSTA10	Protein of unknown function DUF617, plant domain containing protein	-	-	-	-	-	-	GO:0010274//hydrotropism
132	MSTRG.1072.1	Os01g0268733	-	Hypothetical gene	-	-	-	-	-	-	-
133	MSTRG.1074.1	Os01g0268700	OsSTA10	Protein of unknown function DUF617, plant domain containing protein	-	-	-	-	-	-	GO:0010274//hydrotropism
133	MSTRG.1074.1	Os01g0268733	-	Hypothetical gene	-	-	-	-	-	-	-
134	MSTRG.1075.1	Os01g0268700	OsSTA10	Protein of unknown function DUF617, plant domain containing protein	-	-	-	-	-	-	GO:0010274//hydrotropism
134	MSTRG.1075.1	Os01g0268733	-	Hypothetical gene	-	-	-	-	-	-	-
134	MSTRG.1075.1	Os01g0268800	OsRhmbd2	Ubiquitin-associated/translation elongation factor EF1B, N-terminal, eukaryote domain containing protein	-	-	-	-	GO:0016020//membrane;GO:0016021//integral component of membrane	GO:0004252//serine-type endopeptidase activity;GO:0005515//protein binding	GO:0006508//proteolysis
135	MSTRG.1081.1	Os01g0269550	-	Hypothetical protein	-	-	-	-	-	-	-
136	MSTRG.1109.1	Os01g0275700	-	Non-protein coding transcript	-	-	-	-	-	-	-
136	MSTRG.1109.1	Os01g0275900	-	Hypothetical conserved gene	-	-	-	-	-	-	-
136	MSTRG.1109.1	Os01g0276000	-	Similar to 60S ribosomal protein L30	Genetic Information Processing	Translation	ko03010//Ribosome	K02908	GO:0005840//ribosome;GO:0022625//cytosolic large ribosomal subunit	GO:0003723//RNA binding;GO:0003735//structural constituent of ribosome	GO:0006412//translation
136	MSTRG.1109.1	Os01g0276033	-	Non-protein coding transcript	-	-	-	-	-	-	-
136	MSTRG.1109.1	Os01g0276066	-	Non-protein coding transcript	-	-	-	-	-	-	-
136	MSTRG.1109.1	Os01g0275950	-	Hypothetical conserved gene	-	-	-	-	-	-	-
137	MSTRG.1114.1	Os01g0276066	-	Non-protein coding transcript	-	-	-	-	-	-	-
137	MSTRG.1114.1	Os01g0275800	-	Hypothetical gene	-	-	-	-	-	-	-
137	MSTRG.1114.1	Os01g0275950	-	Hypothetical conserved gene	-	-	-	-	-	-	-
137	MSTRG.1114.1	Os01g0276100	OsIDHa	Similar to 3-isopropylmalate dehydrogenase, chloroplast precursor (EC 1.1.1.85) (Beta-IPM dehydrogenase) (IMDH) (3-IPM-DH)	Metabolism;Metabolism;Metabolism;Metabolism;Metabolism;Metabolism	Global and overview maps;Global and overview maps;Global and overview maps;Global and overview maps;Global and overview maps;Carbohydrate metabolism	ko01100//Metabolic pathways;ko01110//Biosynthesis of secondary metabolites;ko01200//Carbon metabolism;ko01230//Biosynthesis of amino acids;ko01210//2-Oxocarboxylic acid metabolism;ko00020//Citrate cycle (TCA cycle)	K00030;K00030;K00030;K00030;K00030;K00030	GO:0005739//mitochondrion	GO:0000287//magnesium ion binding;GO:0004449//isocitrate dehydrogenase (NAD+) activity;GO:0016616//oxidoreductase activity, acting on the CH-OH group of donors, NAD or NADP as acceptor;GO:0051287//NAD binding	GO:0006099//tricarboxylic acid cycle;GO:0006102//isocitrate metabolic process;GO:0055114//oxidation-reduction process
138	MSTRG.1141.1	Os01g0279300	OsCaM3	Similar to Calmodulin 1 (Fragment)	Organismal Systems;Environmental Information Processing;Environmental Information Processing	Environmental adaptation;Signal transduction;Signal transduction	ko04626//Plant-pathogen interaction;ko04016//MAPK signaling pathway - plant;ko04070//Phosphatidylinositol signaling system	K02183;K02183;K02183	GO:0005634//nucleus	GO:0005509//calcium ion binding;GO:0046872//metal ion binding	GO:0019722//calcium-mediated signaling
138	MSTRG.1141.1	Os01g0279200	-	Similar to COP9 signalosome complex subunit 2	-	-	-	-	GO:0005737//cytoplasm;GO:0005829//cytosol;GO:0008180//COP9 signalosome	GO:0003714//transcription corepressor activity	GO:0000338//protein deneddylation;GO:0045892//negative regulation of transcription, DNA-templated
138	MSTRG.1141.1	Os01g0279500	-	Hypothetical gene	-	-	-	-	-	-	-
139	MSTRG.1145.1	Os01g0279800	-	Similar to LRR protein	-	-	-	-	GO:0005886//plasma membrane	GO:0005515//protein binding	GO:0009755//hormone-mediated signaling pathway
139	MSTRG.1145.1	Os01g0279900	OsbZIP03	Similar to Transcription factor TGA6 (AtbZIP45). Splice isoform 2	Environmental Information Processing	Signal transduction	ko04075//Plant hormone signal transduction	K14431	GO:0005634//nucleus	GO:0003677//DNA binding;GO:0003700//transcription factor activity, sequence-specific DNA binding;GO:0005515//protein binding;GO:0043565//sequence-specific DNA binding	GO:0006351//transcription, DNA-templated;GO:0006355//regulation of transcription, DNA-templated;GO:0006952//defense response
139	MSTRG.1145.1	Os01g0280000	-	Similar to Histone mRNA exonuclease 1	-	-	-	-	-	GO:0000175//3'-5'-exoribonuclease activity;GO:0003676//nucleic acid binding;GO:0008310//single-stranded DNA 3'-5' exodeoxyribonuclease activity	GO:0006259//DNA metabolic process;GO:0090305//nucleic acid phosphodiester bond hydrolysis;GO:0090503//RNA phosphodiester bond hydrolysis, exonucleolytic
140	MSTRG.1148.1	Os01g0280400	-	DNA-binding protein	-	-	-	-	GO:0005739//mitochondrion	GO:0003677//DNA binding;GO:0005515//protein binding	-
140	MSTRG.1148.1	Os01g0280500	-	Similar to Eukaryotic translation initiation factor 6 (eIF-6) (B4 integrin interactor) (CAB) (p27(BBP)) (B(2)GCN homolog)	Genetic Information Processing	Translation	ko03008//Ribosome biogenesis in eukaryotes	K03264	GO:0005634//nucleus;GO:0005730//nucleolus;GO:0005737//cytoplasm;GO:0005829//cytosol;GO:0030687//preribosome, large subunit precursor	GO:0003743//translation initiation factor activity;GO:0043022//ribosome binding;GO:0043023//ribosomal large subunit binding	GO:0000054//ribosomal subunit export from nucleus;GO:0000460//maturation of 5.8S rRNA;GO:0000470//maturation of LSU-rRNA;GO:0006412//translation;GO:0006413//translational initiation;GO:0007229//integrin-mediated signaling pathway;GO:0042254//ribosome biogenesis;GO:0042256//mature ribosome assembly;GO:0042273//ribosomal large subunit biogenesis;GO:1902626//assembly of large subunit precursor of pr…
140	MSTRG.1148.1	Os01g0280600	-	Conserved hypothetical protein	-	-	-	-	-	-	-
141	MSTRG.1152.1	Os01g0281000	OsFbox006	Cyclin-like F-box domain containing protein	-	-	-	-	-	GO:0005515//protein binding	-
141	MSTRG.1152.1	Os01g0281050	-	Hypothetical protein	-	-	-	-	-	-	-
141	MSTRG.1152.1	Os01g0281200	OsCycB1	Similar to Type B-like cyclin (Fragment)	-	-	-	-	GO:0005634//nucleus	-	-
141	MSTRG.1152.1	Os01g0281250	-	Hypothetical protein	-	-	-	-	-	-	-
142	MSTRG.1163.1	MSTRG.1164	--	Os01g0285950 [Oryza sativa Japonica Group]	-	-	-	-	-	-	-
142	MSTRG.1163.1	Os01g0286000	-	Snf7 family protein	Cellular Processes	Transport and catabolism	ko04144//Endocytosis	K15053	-	-	GO:0007034//vacuolar transport
142	MSTRG.1163.1	Os01g0286100	PIL15	Phytochrome-interacting factor-like protein, Basic helix-loop-helix factor, Repression of seedling growth in the dar	Environmental Information Processing;Organismal Systems	Signal transduction;Environmental adaptation	ko04075//Plant hormone signal transduction;ko04712//Circadian rhythm - plant	K12126;K12126	GO:0005634//nucleus	GO:0003677//DNA binding;GO:0005515//protein binding;GO:0046983//protein dimerization activity	GO:0006355//regulation of transcription, DNA-templated;GO:0090229//negative regulation of red or far-red light signaling pathway
142	MSTRG.1163.1	Os01g0286200	-	Hypothetical protein	-	-	-	-	-	-	-
143	MSTRG.1167.1	MSTRG.1164	--	Os01g0285950 [Oryza sativa Japonica Group]	-	-	-	-	-	-	-
143	MSTRG.1167.1	Os01g0286000	-	Snf7 family protein	Cellular Processes	Transport and catabolism	ko04144//Endocytosis	K15053	-	-	GO:0007034//vacuolar transport
143	MSTRG.1167.1	Os01g0286200	-	Hypothetical protein	-	-	-	-	-	-	-
144	MSTRG.1170.1	Os01g0286500	-	Conserved hypothetical protein	-	-	-	-	-	-	-
144	MSTRG.1170.1	Os01g0286100	PIL15	Phytochrome-interacting factor-like protein, Basic helix-loop-helix factor, Repression of seedling growth in the dar	Environmental Information Processing;Organismal Systems	Signal transduction;Environmental adaptation	ko04075//Plant hormone signal transduction;ko04712//Circadian rhythm - plant	K12126;K12126	GO:0005634//nucleus	GO:0003677//DNA binding;GO:0005515//protein binding;GO:0046983//protein dimerization activity	GO:0006355//regulation of transcription, DNA-templated;GO:0090229//negative regulation of red or far-red light signaling pathway
144	MSTRG.1170.1	Os01g0286200	-	Hypothetical protein	-	-	-	-	-	-	-
145	MSTRG.1173.1	Os01g0286900	OsIAA4	Similar to Auxin-responsive protein IAA31 (Indoleacetic acid-induced protein 31)	Environmental Information Processing	Signal transduction	ko04075//Plant hormone signal transduction	K14484	GO:0005634//nucleus	GO:0005515//protein binding	GO:0006355//regulation of transcription, DNA-templated;GO:0009734//auxin-activated signaling pathway
145	MSTRG.1173.1	MSTRG.1175	--	Os06g0108900, partial [Oryza sativa Japonica Group]	-	-	-	-	-	-	-
146	MSTRG.1174.1	Os01g0286900	OsIAA4	Similar to Auxin-responsive protein IAA31 (Indoleacetic acid-induced protein 31)	Environmental Information Processing	Signal transduction	ko04075//Plant hormone signal transduction	K14484	GO:0005634//nucleus	GO:0005515//protein binding	GO:0006355//regulation of transcription, DNA-templated;GO:0009734//auxin-activated signaling pathway
146	MSTRG.1174.1	MSTRG.1175	--	Os06g0108900, partial [Oryza sativa Japonica Group]	-	-	-	-	-	-	-
147	MSTRG.1184.2	Os01g0290600	-	Similar to isopenicillin N epimerase	Metabolism;Metabolism	Global and overview maps;Amino acid metabolism	ko01100//Metabolic pathways;ko00270//Cysteine and methionine metabolism	K22207;K22207	-	GO:0003824//catalytic activity	-
147	MSTRG.1184.2	Os01g0290800	-	Hypothetical protein	-	-	-	-	-	-	-
148	MSTRG.1196.1	Os01g0294500	-	Similar to Class III peroxidase 9	Metabolism;Metabolism;Metabolism	Global and overview maps;Global and overview maps;Biosynthesis of other secondary metabolites	ko01100//Metabolic pathways;ko01110//Biosynthesis of secondary metabolites;ko00940//Phenylpropanoid biosynthesis	K00430;K00430;K00430	GO:0005576//extracellular region;GO:0009505//plant-type cell wall;GO:0009506//plasmodesma	GO:0004601//peroxidase activity;GO:0016491//oxidoreductase activity;GO:0020037//heme binding;GO:0046872//metal ion binding	GO:0006979//response to oxidative stress;GO:0042744//hydrogen peroxide catabolic process;GO:0055114//oxidation-reduction process;GO:0098869//cellular oxidant detoxification
148	MSTRG.1196.1	MSTRG.1197	--	OSJNBb0067G11.3 [Oryza sativa Japonica Group]	-	-	-	-	-	-	-
149	MSTRG.1208.1	Os01g0298301	-	Hypothetical conserved gene	-	-	-	-	-	-	-
149	MSTRG.1208.1	Os01g0298400	-	Myb transcription factor domain containing protein	-	-	-	-	GO:0005634//nucleus	GO:0003677//DNA binding;GO:0043565//sequence-specific DNA binding	GO:0006355//regulation of transcription, DNA-templated
150	MSTRG.1212.2	Os01g0299300	GPAT	Hypothetical conserved gene	Metabolism;Metabolism;Metabolism;Metabolism	Global and overview maps;Global and overview maps;Lipid metabolism;Lipid metabolism	ko01100//Metabolic pathways;ko01110//Biosynthesis of secondary metabolites;ko00564//Glycerophospholipid metabolism;ko00561//Glycerolipid metabolism	K13508;K13508;K13508;K13508	GO:0016020//membrane	GO:0016746//transferase activity, transferring acyl groups;GO:0016791//phosphatase activity;GO:0090447//glycerol-3-phosphate 2-O-acyltransferase activity	GO:0010143//cutin biosynthetic process;GO:0016311//dephosphorylation
150	MSTRG.1212.2	Os01g0299500	-	Conserved hypothetical protein	-	-	-	-	GO:0016021//integral component of membrane	-	-
150	MSTRG.1212.2	Os01g0299700	-	3'-5' exonuclease domain containing protein	-	-	-	-	GO:0005737//cytoplasm	GO:0003676//nucleic acid binding;GO:0008408//3'-5' exonuclease activity	GO:0006139//nucleobase-containing compound metabolic process;GO:0090305//nucleic acid phosphodiester bond hydrolysis
150	MSTRG.1212.2	Os01g0299801	-	Conserved hypothetical protein	-	-	-	-	-	-	-
151	MSTRG.1221.1	Os01g0302000	-	Hypothetical conserved gene	-	-	-	-	-	-	-
151	MSTRG.1221.1	Os01g0302100	-	Conserved hypothetical protein	-	-	-	-	-	-	-
152	MSTRG.1221.2	Os01g0302000	-	Hypothetical conserved gene	-	-	-	-	-	-	-
152	MSTRG.1221.2	Os01g0302100	-	Conserved hypothetical protein	-	-	-	-	-	-	-
153	MSTRG.1227.1	Os01g0302800	-	Conserved hypothetical protein	-	-	-	-	-	-	-
153	MSTRG.1227.1	Os01g0302900	-	Conserved hypothetical protein	-	-	-	-	-	-	-
153	MSTRG.1227.1	Os01g0303000	-	Similar to CP12 (Fragment)	-	-	-	-	GO:0009507//chloroplast	-	GO:0080153//negative regulation of reductive pentose-phosphate cycle
154	MSTRG.1236.1	Os01g0304400	-	Conserved hypothetical protein	-	-	-	-	-	-	-
154	MSTRG.1236.1	Os01g0304050	-	Non-protein coding transcript	-	-	-	-	-	-	-
154	MSTRG.1236.1	Os01g0304200	-	Similar to Transcription factor PCF7	-	-	-	-	-	-	-
155	MSTRG.1237.1	Os01g0304500	-	Hypothetical conserved gene	-	-	-	-	GO:0016020//membrane;GO:0016021//integral component of membrane	-	-
156	MSTRG.1238.1	Os01g0304500	-	Hypothetical conserved gene	-	-	-	-	GO:0016020//membrane;GO:0016021//integral component of membrane	-	-
157	MSTRG.1248.2	Os01g0309900	-	Lipase, class 3 family protein	-	-	-	-	-	GO:0016787//hydrolase activity	GO:0006629//lipid metabolic process;GO:0016042//lipid catabolic process
157	MSTRG.1248.2	Os01g0310032	-	Similar to Cold-regulated protein	-	-	-	-	-	-	-
158	MSTRG.1250.1	Os01g0310550	-	Non-protein coding transcript	-	-	-	-	-	-	-
158	MSTRG.1250.1	Os01g0310600	-	Non-protein coding transcript	-	-	-	-	-	-	-
159	MSTRG.1249.2	Os01g0310600	-	Non-protein coding transcript	-	-	-	-	-	-	-
159	MSTRG.1249.2	Os01g0310700	-	Non-protein coding transcript	-	-	-	-	-	-	-
160	MSTRG.1251.2	Os01g0310700	-	Non-protein coding transcript	-	-	-	-	-	-	-
160	MSTRG.1251.2	Os01g0310800	OsWAK4	Similar to Pto kinase interactor 1	-	-	-	-	GO:0005886//plasma membrane	GO:0000166//nucleotide binding;GO:0004672//protein kinase activity;GO:0004674//protein serine/threonine kinase activity;GO:0004675//transmembrane receptor protein serine/threonine kinase activity;GO:0005524//ATP binding;GO:0016301//kinase activity;GO:0016740//transferase activity	GO:0006468//protein phosphorylation;GO:0007178//transmembrane receptor protein serine/threonine kinase signaling pathway;GO:0016310//phosphorylation
161	MSTRG.1279.1	Os01g0321700	-	Similar to predicted protein	-	-	-	-	GO:0000139//Golgi membrane;GO:0005737//cytoplasm;GO:0005783//endoplasmic reticulum;GO:0005789//endoplasmic reticulum membrane;GO:0005829//cytosol;GO:0012507//ER to Golgi transport vesicle membrane;GO:0016020//membrane;GO:0030127//COPII vesicle coat;GO:0031410//cytoplasmic vesicle;GO:0070971//endoplasmic reticulum exit site	GO:0005096//GTPase activator activity;GO:0008270//zinc ion binding;GO:0046872//metal ion binding	GO:0003400//regulation of COPII vesicle coating;GO:0006886//intracellular protein transport;GO:0006888//ER to Golgi vesicle-mediated transport;GO:0007030//Golgi organization;GO:0008360//regulation of cell shape;GO:0010584//pollen exine formation;GO:0015031//protein transport;GO:0016192//vesicle-mediated transport;GO:0016236//macroautophagy;GO:0043547//positive regulation of GTPase activity;GO:004…
162	MSTRG.1287.1	MSTRG.1286	--	-	-	-	-	-	-	-	-
162	MSTRG.1287.1	Os01g0324400	-	Hypothetical conserved gene	-	-	-	-	-	-	-
163	MSTRG.1291.1	MSTRG.1289	--	Os08g0158800, partial [Oryza sativa Japonica Group]	-	-	-	-	-	-	-
163	MSTRG.1291.1	MSTRG.1290	--	Os08g0158800, partial [Oryza sativa Japonica Group]	-	-	-	-	-	-	-
164	MSTRG.1302.2	Os01g0327900	OsFbox008	Hypothetical conserved gene	-	-	-	-	-	GO:0005515//protein binding	-
165	MSTRG.1314.1	Os01g0329300	OsPGL20	Pectin lyase fold domain containing protein	-	-	-	-	GO:0005576//extracellular region	GO:0004650//polygalacturonase activity;GO:0016787//hydrolase activity;GO:0016798//hydrolase activity, acting on glycosyl bonds	GO:0005975//carbohydrate metabolic process;GO:0008152//metabolic process;GO:0071555//cell wall organization
165	MSTRG.1314.1	Os01g0329350	-	Hypothetical protein	-	-	-	-	-	-	-
166	MSTRG.1316.1	Os01g0329900	OsGELP14	Similar to Lipase homolog (Fragment)	-	-	-	-	GO:0016020//membrane;GO:0016021//integral component of membrane	GO:0016788//hydrolase activity, acting on ester bonds	-
166	MSTRG.1316.1	Os01g0330001	-	Non-protein coding transcript	-	-	-	-	-	-	-
167	MSTRG.1323.2	Os01g0332002	-	Non-protein coding transcript	-	-	-	-	-	-	-
168	MSTRG.1329.1	Os01g0332700	-	Similar to predicted protein	-	-	-	-	-	-	-
168	MSTRG.1329.1	Os01g0332800	OsSCP3	Similar to Serine carboxypeptidase II-like protein	-	-	-	-	GO:0005773//vacuole	GO:0004180//carboxypeptidase activity;GO:0004185//serine-type carboxypeptidase activity;GO:0008233//peptidase activity;GO:0016787//hydrolase activity	GO:0006508//proteolysis;GO:0051603//proteolysis involved in cellular protein catabolic process
168	MSTRG.1329.1	Os01g0332900	-	Similar to immediate-early protein RSP40	-	-	-	-	-	-	-
169	MSTRG.1345.1	Os01g0337900	-	Similar to Dihydrolipoamide dehydrogenase	Metabolism;Metabolism;Metabolism;Metabolism;Metabolism;Metabolism;Metabolism;Metabolism;Metabolism;Metabolism;Metabolism;Metabolism	Global and overview maps;Global and overview maps;Global and overview maps;Carbohydrate metabolism;Carbohydrate metabolism;Carbohydrate metabolism;Amino acid metabolism;Amino acid metabolism;Carbohydrate metabolism;Amino acid metabolism;Amino acid metabolism;Carbohydrate metabolism	ko01100//Metabolic pathways;ko01110//Biosynthesis of secondary metabolites;ko01200//Carbon metabolism;ko00010//Glycolysis / Gluconeogenesis;ko00620//Pyruvate metabolism;ko00630//Glyoxylate and dicarboxylate metabolism;ko00260//Glycine, serine and threonine metabolism;ko00380//Tryptophan metabolism;ko00020//Citrate cycle (TCA cycle);ko00280//Valine, leucine and isoleucine degradation;ko00310//Lysi…	K00382;K00382;K00382;K00382;K00382;K00382;K00382;K00382;K00382;K00382;K00382;K00382	GO:0005623//cell	GO:0000166//nucleotide binding;GO:0004148//dihydrolipoyl dehydrogenase activity;GO:0009055//electron carrier activity;GO:0016491//oxidoreductase activity;GO:0016668//oxidoreductase activity, acting on a sulfur group of donors, NAD(P) as acceptor;GO:0050660//flavin adenine dinucleotide binding	GO:0022900//electron transport chain;GO:0045454//cell redox homeostasis;GO:0055114//oxidation-reduction process
169	MSTRG.1345.1	Os01g0338100	-	Similar to Transcription initiation factor IID, 18kD subunit family protein	Genetic Information Processing	Transcription	ko03022//Basal transcription factors	K03127	GO:0005634//nucleus;GO:0005669//transcription factor TFIID complex	GO:0003677//DNA binding;GO:0003712//transcription cofactor activity;GO:0046982//protein heterodimerization activity	GO:0006357//regulation of transcription from RNA polymerase II promoter;GO:0006366//transcription from RNA polymerase II promoter;GO:0009793//embryo development ending in seed dormancy;GO:0009960//endosperm development;GO:0048316//seed development
169	MSTRG.1345.1	Os01g0338000	OsARL1e	Similar to GTP-binding protein SAR1A	Genetic Information Processing	Folding, sorting and degradation	ko04141//Protein processing in endoplasmic reticulum	K07953	GO:0005783//endoplasmic reticulum;GO:0005794//Golgi apparatus;GO:0030127//COPII vesicle coat;GO:0070971//endoplasmic reticulum exit site	GO:0000166//nucleotide binding;GO:0003924//GTPase activity;GO:0005525//GTP binding	GO:0003400//regulation of COPII vesicle coating;GO:0006886//intracellular protein transport;GO:0006888//ER to Golgi vesicle-mediated transport;GO:0015031//protein transport;GO:0016050//vesicle organization;GO:0016192//vesicle-mediated transport;GO:0061024//membrane organization;GO:0070863//positive regulation of protein exit from endoplasmic reticulum
169	MSTRG.1345.1	Os01g0338200	-	Mov34/MPN/PAD-1 family protein	Cellular Processes	Transport and catabolism	ko04144//Endocytosis	K11866	GO:0005768//endosome;GO:0016020//membrane	GO:0004843//thiol-dependent ubiquitin-specific protease activity;GO:0005515//protein binding	GO:0016579//protein deubiquitination;GO:0070536//protein K63-linked deubiquitination;GO:0071108//protein K48-linked deubiquitination
170	MSTRG.1347.1	Os01g0338000	OsARL1e	Similar to GTP-binding protein SAR1A	Genetic Information Processing	Folding, sorting and degradation	ko04141//Protein processing in endoplasmic reticulum	K07953	GO:0005783//endoplasmic reticulum;GO:0005794//Golgi apparatus;GO:0030127//COPII vesicle coat;GO:0070971//endoplasmic reticulum exit site	GO:0000166//nucleotide binding;GO:0003924//GTPase activity;GO:0005525//GTP binding	GO:0003400//regulation of COPII vesicle coating;GO:0006886//intracellular protein transport;GO:0006888//ER to Golgi vesicle-mediated transport;GO:0015031//protein transport;GO:0016050//vesicle organization;GO:0016192//vesicle-mediated transport;GO:0061024//membrane organization;GO:0070863//positive regulation of protein exit from endoplasmic reticulum
170	MSTRG.1347.1	Os01g0338200	-	Mov34/MPN/PAD-1 family protein	Cellular Processes	Transport and catabolism	ko04144//Endocytosis	K11866	GO:0005768//endosome;GO:0016020//membrane	GO:0004843//thiol-dependent ubiquitin-specific protease activity;GO:0005515//protein binding	GO:0016579//protein deubiquitination;GO:0070536//protein K63-linked deubiquitination;GO:0071108//protein K48-linked deubiquitination
171	MSTRG.1348.1	Os01g0338100	-	Similar to Transcription initiation factor IID, 18kD subunit family protein	Genetic Information Processing	Transcription	ko03022//Basal transcription factors	K03127	GO:0005634//nucleus;GO:0005669//transcription factor TFIID complex	GO:0003677//DNA binding;GO:0003712//transcription cofactor activity;GO:0046982//protein heterodimerization activity	GO:0006357//regulation of transcription from RNA polymerase II promoter;GO:0006366//transcription from RNA polymerase II promoter;GO:0009793//embryo development ending in seed dormancy;GO:0009960//endosperm development;GO:0048316//seed development
171	MSTRG.1348.1	Os01g0338000	OsARL1e	Similar to GTP-binding protein SAR1A	Genetic Information Processing	Folding, sorting and degradation	ko04141//Protein processing in endoplasmic reticulum	K07953	GO:0005783//endoplasmic reticulum;GO:0005794//Golgi apparatus;GO:0030127//COPII vesicle coat;GO:0070971//endoplasmic reticulum exit site	GO:0000166//nucleotide binding;GO:0003924//GTPase activity;GO:0005525//GTP binding	GO:0003400//regulation of COPII vesicle coating;GO:0006886//intracellular protein transport;GO:0006888//ER to Golgi vesicle-mediated transport;GO:0015031//protein transport;GO:0016050//vesicle organization;GO:0016192//vesicle-mediated transport;GO:0061024//membrane organization;GO:0070863//positive regulation of protein exit from endoplasmic reticulum
171	MSTRG.1348.1	Os01g0338200	-	Mov34/MPN/PAD-1 family protein	Cellular Processes	Transport and catabolism	ko04144//Endocytosis	K11866	GO:0005768//endosome;GO:0016020//membrane	GO:0004843//thiol-dependent ubiquitin-specific protease activity;GO:0005515//protein binding	GO:0016579//protein deubiquitination;GO:0070536//protein K63-linked deubiquitination;GO:0071108//protein K48-linked deubiquitination
172	MSTRG.1362.1	Os01g0342500	-	Hypothetical conserved gene	-	-	-	-	-	-	-
173	MSTRG.1365.1	Os01g0342500	-	Hypothetical conserved gene	-	-	-	-	-	-	-
174	MSTRG.1371.1	Os01g0343100	-	Protein of unknown function DUF594 family protein	-	-	-	-	GO:0016020//membrane;GO:0016021//integral component of membrane	-	-
174	MSTRG.1371.1	Os01g0343300	OsGATA8	Zinc finger, NHR/GATA-type domain containing protein	-	-	-	-	GO:0005634//nucleus	GO:0003700//transcription factor activity, sequence-specific DNA binding;GO:0008270//zinc ion binding;GO:0043565//sequence-specific DNA binding	GO:0006355//regulation of transcription, DNA-templated;GO:0030154//cell differentiation
175	MSTRG.1370.3	Os01g0343100	-	Protein of unknown function DUF594 family protein	-	-	-	-	GO:0016020//membrane;GO:0016021//integral component of membrane	-	-
175	MSTRG.1370.3	Os01g0343300	OsGATA8	Zinc finger, NHR/GATA-type domain containing protein	-	-	-	-	GO:0005634//nucleus	GO:0003700//transcription factor activity, sequence-specific DNA binding;GO:0008270//zinc ion binding;GO:0043565//sequence-specific DNA binding	GO:0006355//regulation of transcription, DNA-templated;GO:0030154//cell differentiation
175	MSTRG.1370.3	Os01g0343350	-	Hypothetical protein	-	-	-	-	GO:0016020//membrane;GO:0016021//integral component of membrane	-	-
176	MSTRG.1378.1	Os01g0344620	-	Hypothetical gene	-	-	-	-	GO:0016020//membrane;GO:0016021//integral component of membrane	-	-
176	MSTRG.1378.1	MSTRG.1379	--	OSIGBa0103O01.5 [Oryza sativa]	-	-	-	-	-	-	GO:0008152//metabolic process
177	MSTRG.1388.1	Os01g0347100	-	Protein of unknown function DUF1399 family protein	-	-	-	-	GO:0005886//plasma membrane	-	-
177	MSTRG.1388.1	Os01g0347150	-	Non-protein coding transcript	-	-	-	-	-	-	-
177	MSTRG.1388.1	Os01g0347300	-	Conserved hypothetical protein	-	-	-	-	GO:0016020//membrane;GO:0016021//integral component of membrane	-	-
177	MSTRG.1388.1	Os01g0347000	OsPHS1b	Similar to PROPYZAMIDE-HTPERSENSITIVE 1	-	-	-	-	-	GO:0004721//phosphoprotein phosphatase activity;GO:0004725//protein tyrosine phosphatase activity;GO:0008138//protein tyrosine/serine/threonine phosphatase activity;GO:0016791//phosphatase activity	GO:0006470//protein dephosphorylation;GO:0009737//response to abscisic acid;GO:0016311//dephosphorylation;GO:0035335//peptidyl-tyrosine dephosphorylation;GO:0043622//cortical microtubule organization
178	MSTRG.1403.1	Os01g0351800	-	2OG-Fe(II) oxygenase domain containing protein	-	-	-	-	-	GO:0016491//oxidoreductase activity;GO:0046872//metal ion binding;GO:0051213//dioxygenase activity	GO:0055114//oxidation-reduction process
178	MSTRG.1403.1	MSTRG.1404	--	HGWP repeat containing protein-like [Oryza sativa Japonica Group]	-	-	-	-	-	-	-
179	MSTRG.1407.1	MSTRG.1408	atpB	ATP synthase beta subunit, partial [Thunbergia coccinea]	Metabolism;Metabolism;Metabolism	Global and overview maps;Energy metabolism;Energy metabolism	ko01100//Metabolic pathways;ko00190//Oxidative phosphorylation;ko00195//Photosynthesis	K02112;K02112;K02112	GO:0019866//organelle inner membrane;GO:0033178//proton-transporting two-sector ATPase complex, catalytic domain;GO:0044434//chloroplast part;GO:0044455//mitochondrial membrane part	GO:0019829//cation-transporting ATPase activity;GO:0032550//purine ribonucleoside binding	GO:0006754//ATP biosynthetic process;GO:0015988//energy coupled proton transmembrane transport, against electrochemical gradient
179	MSTRG.1407.1	Os01g0352751	-	Non-protein coding transcript	-	-	-	-	-	-	-
180	MSTRG.1409.1	MSTRG.1408	atpB	ATP synthase beta subunit, partial [Thunbergia coccinea]	Metabolism;Metabolism;Metabolism	Global and overview maps;Energy metabolism;Energy metabolism	ko01100//Metabolic pathways;ko00190//Oxidative phosphorylation;ko00195//Photosynthesis	K02112;K02112;K02112	GO:0019866//organelle inner membrane;GO:0033178//proton-transporting two-sector ATPase complex, catalytic domain;GO:0044434//chloroplast part;GO:0044455//mitochondrial membrane part	GO:0019829//cation-transporting ATPase activity;GO:0032550//purine ribonucleoside binding	GO:0006754//ATP biosynthetic process;GO:0015988//energy coupled proton transmembrane transport, against electrochemical gradient
180	MSTRG.1409.1	Os01g0352751	-	Non-protein coding transcript	-	-	-	-	-	-	-
181	MSTRG.1423.1	Os01g0357400	Amy1B*(RAmy1B)	Similar to Alpha-amylase	Metabolism;Metabolism;Metabolism	Global and overview maps;Global and overview maps;Carbohydrate metabolism	ko01100//Metabolic pathways;ko01110//Biosynthesis of secondary metabolites;ko00500//Starch and sucrose metabolism	K01176;K01176;K01176	-	-	-
181	MSTRG.1423.1	Os01g0357500	-	Similar to Ferredoxin-nitrite reductase	Metabolism;Metabolism	Global and overview maps;Energy metabolism	ko01100//Metabolic pathways;ko00910//Nitrogen metabolism	K00366;K00366	-	-	-
181	MSTRG.1423.1	Os01g0357900	OsRALF-4	Similar to RALF	-	-	-	-	GO:0009506//plasmodesma	-	GO:0019722//calcium-mediated signaling
182	MSTRG.1430.1	Os01g0358800	-	Similar to N-acetyltransferase	-	-	-	-	-	GO:0016747//transferase activity, transferring acyl groups other than amino-acyl groups	-
182	MSTRG.1430.1	Os01g0358900	-	Similar to GDHB glutamate dehydrogenase	Metabolism;Metabolism;Metabolism;Metabolism;Metabolism	Global and overview maps;Global and overview maps;Amino acid metabolism;Energy metabolism;Amino acid metabolism	ko01100//Metabolic pathways;ko01200//Carbon metabolism;ko00250//Alanine, aspartate and glutamate metabolism;ko00910//Nitrogen metabolism;ko00220//Arginine biosynthesis	K00261;K00261;K00261;K00261;K00261	GO:0005739//mitochondrion	GO:0004352//glutamate dehydrogenase (NAD+) activity	GO:0006538//glutamate catabolic process;GO:0055114//oxidation-reduction process
182	MSTRG.1430.1	MSTRG.1431	TY3B-G	cell wall protein-like [Oryza sativa Japonica Group]	-	-	-	-	-	GO:0016772//transferase activity, transferring phosphorus-containing groups;GO:0046872//metal ion binding	-
183	MSTRG.1433.1	MSTRG.1435	--	TPA_exp: transposase [Oryza sativa]	-	-	-	-	GO:0043231//intracellular membrane-bounded organelle	-	GO:0006026//aminoglycan catabolic process;GO:0043207//response to external biotic stimulus;GO:0044036//cell wall macromolecule metabolic process
183	MSTRG.1433.1	MSTRG.1431	TY3B-G	cell wall protein-like [Oryza sativa Japonica Group]	-	-	-	-	-	GO:0016772//transferase activity, transferring phosphorus-containing groups;GO:0046872//metal ion binding	-
183	MSTRG.1433.1	MSTRG.1432	--	OSJNBa0059D20.7 [Oryza sativa Japonica Group]	-	-	-	-	-	-	-
183	MSTRG.1433.1	Os01g0359400	-	NB-ARC domain containing protein	-	-	-	-	-	GO:0043531//ADP binding	-
184	MSTRG.1434.1	MSTRG.1435	--	TPA_exp: transposase [Oryza sativa]	-	-	-	-	GO:0043231//intracellular membrane-bounded organelle	-	GO:0006026//aminoglycan catabolic process;GO:0043207//response to external biotic stimulus;GO:0044036//cell wall macromolecule metabolic process
184	MSTRG.1434.1	MSTRG.1431	TY3B-G	cell wall protein-like [Oryza sativa Japonica Group]	-	-	-	-	-	GO:0016772//transferase activity, transferring phosphorus-containing groups;GO:0046872//metal ion binding	-
184	MSTRG.1434.1	MSTRG.1432	--	OSJNBa0059D20.7 [Oryza sativa Japonica Group]	-	-	-	-	-	-	-
184	MSTRG.1434.1	Os01g0359400	-	NB-ARC domain containing protein	-	-	-	-	-	GO:0043531//ADP binding	-
185	MSTRG.1440.1	Os01g0360100	-	Similar to Powdery mildew resistance protein pm3f (Fragment)	-	-	-	-	-	-	-
185	MSTRG.1440.1	Os01g0360150	-	Hypothetical protein	-	-	-	-	GO:0016020//membrane;GO:0016021//integral component of membrane	-	-
185	MSTRG.1440.1	MSTRG.1439	RGA3	Os01g0360175 [Oryza sativa Japonica Group]	-	-	-	-	-	-	-
185	MSTRG.1440.1	Os01g0360200	RBOHB	Similar to Respiratory burst oxidase homolog	Organismal Systems;Environmental Information Processing	Environmental adaptation;Signal transduction	ko04626//Plant-pathogen interaction;ko04016//MAPK signaling pathway - plant	K13447;K13447	GO:0005886//plasma membrane;GO:0016020//membrane;GO:0016021//integral component of membrane	GO:0004601//peroxidase activity;GO:0005509//calcium ion binding;GO:0005515//protein binding;GO:0016174//NAD(P)H oxidase activity;GO:0016491//oxidoreductase activity;GO:0043621//protein self-association;GO:0046872//metal ion binding;GO:0050664//oxidoreductase activity, acting on NAD(P)H, oxygen as acceptor	GO:0055114//oxidation-reduction process;GO:0098869//cellular oxidant detoxification
185	MSTRG.1440.1	Os01g0360333	-	Hypothetical protein	-	-	-	-	-	-	-
186	MSTRG.1452.1	Os01g0362400	-	Conserved hypothetical protein	-	-	-	-	-	-	-
186	MSTRG.1452.1	Os01g0362533	-	Conserved hypothetical protein	-	-	-	-	-	-	-
186	MSTRG.1452.1	Os01g0362800	-	Conserved hypothetical protein	-	-	-	-	-	-	-
187	MSTRG.1463.1	Os01g0364450	-	Hypothetical gene	-	-	-	-	-	-	-
188	MSTRG.1466.1	Os01g0364900	-	Conserved hypothetical protein	-	-	-	-	-	-	-
189	MSTRG.1467.2	Os01g0366300	-	Similar to Receptor protein kinase	-	-	-	-	GO:0005886//plasma membrane;GO:0016020//membrane;GO:0016021//integral component of membrane	GO:0004672//protein kinase activity;GO:0004674//protein serine/threonine kinase activity;GO:0005524//ATP binding	GO:0006468//protein phosphorylation
189	MSTRG.1467.2	Os01g0366400	-	Hypothetical protein	-	-	-	-	-	-	-
190	MSTRG.1495.2	Os01g0372100	-	Hypothetical gene	-	-	-	-	-	-	-
190	MSTRG.1495.2	Os01g0372400	OsGSTF13	Glutathione S-transferase, C-terminal-like domain containing protein	Metabolism;Metabolism	Global and overview maps;Metabolism of other amino acids	ko01100//Metabolic pathways;ko00480//Glutathione metabolism	K00799;K00799	GO:0005737//cytoplasm	GO:0004364//glutathione transferase activity;GO:0005515//protein binding;GO:0043295//glutathione binding	GO:0006749//glutathione metabolic process
190	MSTRG.1495.2	Os01g0372450	-	Hypothetical protein	-	-	-	-	-	-	-
190	MSTRG.1495.2	Os01g0372500	ANS	Similar to Leucoanthocyanidin dioxygenase (EC 1.14.11.19) (LDOX) (Leucocyanidin oxygenase) (Leucoanthocyanidin hydroxylase)	Metabolism;Metabolism;Metabolism	Global and overview maps;Global and overview maps;Biosynthesis of other secondary metabolites	ko01100//Metabolic pathways;ko01110//Biosynthesis of secondary metabolites;ko00941//Flavonoid biosynthesis	K05277;K05277;K05277	-	GO:0016491//oxidoreductase activity;GO:0031418//L-ascorbic acid binding;GO:0046872//metal ion binding;GO:0050589//leucocyanidin oxygenase activity;GO:0051213//dioxygenase activity	GO:0009718//anthocyanin-containing compound biosynthetic process;GO:0009813//flavonoid biosynthetic process;GO:0055114//oxidation-reduction process
191	MSTRG.1499.1	MSTRG.1498	--	OSJNBb0067G11.3 [Oryza sativa Japonica Group]	-	-	-	-	-	-	-
191	MSTRG.1499.1	Os01g0373400	-	Homeodomain-like containing protein	-	-	-	-	GO:0005840//ribosome	GO:0003677//DNA binding	-
191	MSTRG.1499.1	Os01g0373200	-	Hypothetical conserved gene	-	-	-	-	-	-	-
192	MSTRG.1501.1	MSTRG.1498	--	OSJNBb0067G11.3 [Oryza sativa Japonica Group]	-	-	-	-	-	-	-
192	MSTRG.1501.1	Os01g0373400	-	Homeodomain-like containing protein	-	-	-	-	GO:0005840//ribosome	GO:0003677//DNA binding	-
192	MSTRG.1501.1	Os01g0373500	-	Protein of unknown function DUF594 domain containing protein	-	-	-	-	GO:0016020//membrane;GO:0016021//integral component of membrane	-	-
193	MSTRG.1502.1	MSTRG.1498	--	OSJNBb0067G11.3 [Oryza sativa Japonica Group]	-	-	-	-	-	-	-
193	MSTRG.1502.1	Os01g0373400	-	Homeodomain-like containing protein	-	-	-	-	GO:0005840//ribosome	GO:0003677//DNA binding	-
193	MSTRG.1502.1	Os01g0373500	-	Protein of unknown function DUF594 domain containing protein	-	-	-	-	GO:0016020//membrane;GO:0016021//integral component of membrane	-	-
193	MSTRG.1502.1	Os01g0373200	-	Hypothetical conserved gene	-	-	-	-	-	-	-
194	MSTRG.1503.1	MSTRG.1498	--	OSJNBb0067G11.3 [Oryza sativa Japonica Group]	-	-	-	-	-	-	-
194	MSTRG.1503.1	Os01g0373400	-	Homeodomain-like containing protein	-	-	-	-	GO:0005840//ribosome	GO:0003677//DNA binding	-
194	MSTRG.1503.1	Os01g0373500	-	Protein of unknown function DUF594 domain containing protein	-	-	-	-	GO:0016020//membrane;GO:0016021//integral component of membrane	-	-
194	MSTRG.1503.1	Os01g0373200	-	Hypothetical conserved gene	-	-	-	-	-	-	-
195	MSTRG.1505.1	Os01g0374501	-	Similar to mTERF family protein	-	-	-	-	-	GO:0003690//double-stranded DNA binding	GO:0006355//regulation of transcription, DNA-templated
195	MSTRG.1505.1	Os01g0374600	OsLAC1	Similar to Laccase-21	-	-	-	-	GO:0048046//apoplast	GO:0005507//copper ion binding;GO:0016491//oxidoreductase activity;GO:0016722//oxidoreductase activity, oxidizing metal ions;GO:0046872//metal ion binding;GO:0052716//hydroquinone:oxygen oxidoreductase activity	GO:0046274//lignin catabolic process;GO:0055114//oxidation-reduction process
195	MSTRG.1505.1	Os01g0374900	-	Zinc finger, RING/FYVE/PHD-type domain containing protein	Genetic Information Processing	Folding, sorting and degradation	ko04120//Ubiquitin mediated proteolysis	K10604	-	GO:0061630//ubiquitin protein ligase activity	GO:0016567//protein ubiquitination
196	MSTRG.1510.1	Os01g0375100	OsDjC6	Similar to DnAJ-like protein slr0093	-	-	-	-	-	-	-
197	MSTRG.1512.1	Os01g0376200	-	Non-protein coding transcript	-	-	-	-	-	-	-
198	MSTRG.1515.1	Os01g0376600	-	Hypothetical conserved gene	-	-	-	-	-	-	-
198	MSTRG.1515.1	Os01g0377000	-	Cytochrome P450 family protein	-	-	-	-	GO:0016020//membrane;GO:0016021//integral component of membrane	GO:0004497//monooxygenase activity;GO:0005506//iron ion binding;GO:0016491//oxidoreductase activity;GO:0016705//oxidoreductase activity, acting on paired donors, with incorporation or reduction of molecular oxygen;GO:0016709//oxidoreductase activity, acting on paired donors, with incorporation or reduction of molecular oxygen, NAD(P)H as one donor, and incorporation of one atom of oxygen;GO:00200…	GO:0055114//oxidation-reduction process
198	MSTRG.1515.1	Os01g0377250	-	Similar to Cytochrome P450 CYP71K15	-	-	-	-	-	-	-
199	MSTRG.1535.1	Os01g0386500	OsRNAG	Conserved hypothetical protein	-	-	-	-	-	-	-
200	MSTRG.1536.1	Os01g0386500	OsRNAG	Conserved hypothetical protein	-	-	-	-	-	-	-
200	MSTRG.1536.1	Os01g0386600	-	TGF-beta receptor, type I/II extracellular region family protein	-	-	-	-	GO:0016020//membrane;GO:0016021//integral component of membrane	GO:0015112//nitrate transmembrane transporter activity;GO:0015333//peptide:proton symporter activity;GO:0022857//transmembrane transporter activity;GO:0035673//oligopeptide transmembrane transporter activity;GO:1904680//peptide transmembrane transporter activity	GO:0010167//response to nitrate;GO:0015706//nitrate transport;GO:0055085//transmembrane transport
201	MSTRG.1537.1	Os01g0386500	OsRNAG	Conserved hypothetical protein	-	-	-	-	-	-	-
201	MSTRG.1537.1	Os01g0386600	-	TGF-beta receptor, type I/II extracellular region family protein	-	-	-	-	GO:0016020//membrane;GO:0016021//integral component of membrane	GO:0015112//nitrate transmembrane transporter activity;GO:0015333//peptide:proton symporter activity;GO:0022857//transmembrane transporter activity;GO:0035673//oligopeptide transmembrane transporter activity;GO:1904680//peptide transmembrane transporter activity	GO:0010167//response to nitrate;GO:0015706//nitrate transport;GO:0055085//transmembrane transport
202	MSTRG.1539.1	Os01g0386500	OsRNAG	Conserved hypothetical protein	-	-	-	-	-	-	-
202	MSTRG.1539.1	Os01g0386600	-	TGF-beta receptor, type I/II extracellular region family protein	-	-	-	-	GO:0016020//membrane;GO:0016021//integral component of membrane	GO:0015112//nitrate transmembrane transporter activity;GO:0015333//peptide:proton symporter activity;GO:0022857//transmembrane transporter activity;GO:0035673//oligopeptide transmembrane transporter activity;GO:1904680//peptide transmembrane transporter activity	GO:0010167//response to nitrate;GO:0015706//nitrate transport;GO:0055085//transmembrane transport
203	MSTRG.1540.1	Os01g0386500	OsRNAG	Conserved hypothetical protein	-	-	-	-	-	-	-
203	MSTRG.1540.1	Os01g0386600	-	TGF-beta receptor, type I/II extracellular region family protein	-	-	-	-	GO:0016020//membrane;GO:0016021//integral component of membrane	GO:0015112//nitrate transmembrane transporter activity;GO:0015333//peptide:proton symporter activity;GO:0022857//transmembrane transporter activity;GO:0035673//oligopeptide transmembrane transporter activity;GO:1904680//peptide transmembrane transporter activity	GO:0010167//response to nitrate;GO:0015706//nitrate transport;GO:0055085//transmembrane transport
203	MSTRG.1540.1	Os01g0386700	-	Similar to BSK1 (BR-SIGNALING KINASE 1); ATP binding / binding / kinase/ protein kinase/ protein tyrosine kinase	-	-	-	-	-	-	-
204	MSTRG.1542.1	MSTRG.1544	--	OSJNBa0042F21.11 [Oryza sativa Japonica Group]	-	-	-	-	-	-	-
204	MSTRG.1542.1	MSTRG.1541	--	cell wall protein-like [Oryza sativa Japonica Group]	-	-	-	-	-	-	-
205	MSTRG.1545.1	MSTRG.1544	--	OSJNBa0042F21.11 [Oryza sativa Japonica Group]	-	-	-	-	-	-	-
205	MSTRG.1545.1	MSTRG.1546	--	OSJNBa0057M08.14 [Oryza sativa Japonica Group]	-	-	-	-	-	-	-
206	MSTRG.1548.1	MSTRG.1546	--	OSJNBa0057M08.14 [Oryza sativa Japonica Group]	-	-	-	-	-	-	-
206	MSTRG.1548.1	Os01g0387133	-	Hypothetical gene	-	-	-	-	-	-	-
207	MSTRG.1558.1	Os01g0390600	-	Pentatricopeptide repeat domain containing protein	-	-	-	-	GO:0043231//intracellular membrane-bounded organelle	GO:0005515//protein binding	GO:0009451//RNA modification;GO:0080156//mitochondrial mRNA modification
207	MSTRG.1558.1	Os01g0390900	OsDsPTP1	Similar to Dual-specificity protein phosphatase-like protein	-	-	-	-	GO:0005634//nucleus;GO:0005737//cytoplasm;GO:0005829//cytosol;GO:0005886//plasma membrane	GO:0008138//protein tyrosine/serine/threonine phosphatase activity;GO:0016791//phosphatase activity;GO:0017017//MAP kinase tyrosine/serine/threonine phosphatase activity;GO:0033549//MAP kinase phosphatase activity	GO:0006470//protein dephosphorylation;GO:0006979//response to oxidative stress;GO:0009651//response to salt stress;GO:0010193//response to ozone;GO:0010224//response to UV-B;GO:0010225//response to UV-C;GO:0016311//dephosphorylation;GO:0034051//negative regulation of plant-type hypersensitive response;GO:0034599//cellular response to oxidative stress;GO:0043407//negative regulation of MAP kinase …
208	MSTRG.1576.1	MSTRG.1575	Tf2-11	OSJNBb0045P24.9 [Oryza sativa Japonica Group]	-	-	-	-	-	-	-
208	MSTRG.1576.1	Os01g0495701	-	Hypothetical conserved gene	-	-	-	-	-	-	-
209	MSTRG.1577.1	MSTRG.1575	Tf2-11	OSJNBb0045P24.9 [Oryza sativa Japonica Group]	-	-	-	-	-	-	-
209	MSTRG.1577.1	Os01g0495701	-	Hypothetical conserved gene	-	-	-	-	-	-	-
209	MSTRG.1577.1	Os01g0444100	-	Conserved hypothetical protein	-	-	-	-	GO:0016020//membrane;GO:0016021//integral component of membrane	-	-
210	MSTRG.1585.1	Os01g0498200	-	Conserved hypothetical protein	-	-	-	-	-	-	GO:0006355//regulation of transcription, DNA-templated;GO:0007623//circadian rhythm
210	MSTRG.1585.1	Os01g0498300	-	Glycosyltransferase AER61, uncharacterized domain containing protein	-	-	-	-	GO:0016020//membrane;GO:0016021//integral component of membrane	GO:0016757//transferase activity, transferring glycosyl groups	-
211	MSTRG.1587.1	Os01g0499300	-	Mov34/MPN/PAD-1 family protein	Cellular Processes	Transport and catabolism	ko04144//Endocytosis	K11866	GO:0005768//endosome;GO:0016020//membrane	GO:0004843//thiol-dependent ubiquitin-specific protease activity;GO:0005515//protein binding	GO:0016579//protein deubiquitination;GO:0070536//protein K63-linked deubiquitination;GO:0071108//protein K48-linked deubiquitination
211	MSTRG.1587.1	Os01g0500100	-	Conserved hypothetical protein	-	-	-	-	-	-	-
212	MSTRG.1592.2	Os01g0500750	-	Non-protein coding transcript	-	-	-	-	-	-	-
212	MSTRG.1592.2	Os01g0500900	-	Rossmann-like alpha/beta/alpha sandwich fold domain containing protein	Genetic Information Processing	Translation	ko00970//Aminoacyl-tRNA biosynthesis	K01866	GO:0005739//mitochondrion;GO:0005829//cytosol;GO:0009507//chloroplast;GO:0009570//chloroplast stroma	GO:0000166//nucleotide binding;GO:0003723//RNA binding;GO:0004812//aminoacyl-tRNA ligase activity;GO:0004831//tyrosine-tRNA ligase activity;GO:0005524//ATP binding;GO:0016874//ligase activity	GO:0006412//translation;GO:0006418//tRNA aminoacylation for protein translation;GO:0006437//tyrosyl-tRNA aminoacylation;GO:0009793//embryo development ending in seed dormancy;GO:0043039//tRNA aminoacylation
212	MSTRG.1592.2	Os01g0501000	OsMED9	Conserved hypothetical protein	-	-	-	-	GO:0016592//mediator complex	-	-
213	MSTRG.1592.3	Os01g0500750	-	Non-protein coding transcript	-	-	-	-	-	-	-
213	MSTRG.1592.3	Os01g0500900	-	Rossmann-like alpha/beta/alpha sandwich fold domain containing protein	Genetic Information Processing	Translation	ko00970//Aminoacyl-tRNA biosynthesis	K01866	GO:0005739//mitochondrion;GO:0005829//cytosol;GO:0009507//chloroplast;GO:0009570//chloroplast stroma	GO:0000166//nucleotide binding;GO:0003723//RNA binding;GO:0004812//aminoacyl-tRNA ligase activity;GO:0004831//tyrosine-tRNA ligase activity;GO:0005524//ATP binding;GO:0016874//ligase activity	GO:0006412//translation;GO:0006418//tRNA aminoacylation for protein translation;GO:0006437//tyrosyl-tRNA aminoacylation;GO:0009793//embryo development ending in seed dormancy;GO:0043039//tRNA aminoacylation
213	MSTRG.1592.3	Os01g0501000	OsMED9	Conserved hypothetical protein	-	-	-	-	GO:0016592//mediator complex	-	-
214	MSTRG.1592.4	Os01g0500750	-	Non-protein coding transcript	-	-	-	-	-	-	-
214	MSTRG.1592.4	Os01g0500900	-	Rossmann-like alpha/beta/alpha sandwich fold domain containing protein	Genetic Information Processing	Translation	ko00970//Aminoacyl-tRNA biosynthesis	K01866	GO:0005739//mitochondrion;GO:0005829//cytosol;GO:0009507//chloroplast;GO:0009570//chloroplast stroma	GO:0000166//nucleotide binding;GO:0003723//RNA binding;GO:0004812//aminoacyl-tRNA ligase activity;GO:0004831//tyrosine-tRNA ligase activity;GO:0005524//ATP binding;GO:0016874//ligase activity	GO:0006412//translation;GO:0006418//tRNA aminoacylation for protein translation;GO:0006437//tyrosyl-tRNA aminoacylation;GO:0009793//embryo development ending in seed dormancy;GO:0043039//tRNA aminoacylation
214	MSTRG.1592.4	Os01g0501000	OsMED9	Conserved hypothetical protein	-	-	-	-	GO:0016592//mediator complex	-	-
214	MSTRG.1592.4	Os01g0500825	-	Conserved hypothetical protein	-	-	-	-	-	-	-
215	MSTRG.1600.3	Os01g0502700	-	Similar to Histone H2A	-	-	-	-	GO:0000786//nucleosome;GO:0000790//nuclear chromatin;GO:0005634//nucleus;GO:0005694//chromosome	GO:0003677//DNA binding;GO:0046982//protein heterodimerization activity	GO:0006325//chromatin organization
216	MSTRG.1603.1	MSTRG.1604	--	uncharacterized protein LOC107280564 [Oryza sativa Japonica Group]	-	-	-	-	-	-	-
217	MSTRG.1606.1	Os01g0504100	OsPUP8	Protein of unknown function DUF250 domain containing protein	-	-	-	-	GO:0016020//membrane;GO:0016021//integral component of membrane	GO:0005215//transporter activity;GO:0015211//purine nucleoside transmembrane transporter activity	GO:0015860//purine nucleoside transmembrane transport
217	MSTRG.1606.1	Os01g0504300	-	Non-protein coding transcript	-	-	-	-	-	-	-
218	MSTRG.1625.1	Os01g0508500	RH2	Conserved hypothetical protein	-	-	-	-	GO:0005634//nucleus	GO:0005515//protein binding	GO:0006952//defense response;GO:0010112//regulation of systemic acquired resistance
218	MSTRG.1625.1	Os01g0508300	-	Conserved hypothetical protein	-	-	-	-	-	-	-
219	MSTRG.1637.1	Os01g0510800	TAF6	Histone-fold domain containing protein	Genetic Information Processing	Transcription	ko03022//Basal transcription factors	K03131	GO:0000124//SAGA complex;GO:0005634//nucleus;GO:0005669//transcription factor TFIID complex;GO:0046695//SLIK (SAGA-like) complex	GO:0001102//RNA polymerase II activating transcription factor binding;GO:0046982//protein heterodimerization activity	GO:0006325//chromatin organization;GO:0006352//DNA-templated transcription, initiation;GO:0006357//regulation of transcription from RNA polymerase II promoter;GO:0006366//transcription from RNA polymerase II promoter;GO:0006367//transcription initiation from RNA polymerase II promoter;GO:0051123//RNA polymerase II transcriptional preinitiation complex assembly
219	MSTRG.1637.1	Os01g0510901	-	Conserved hypothetical protein	-	-	-	-	-	-	-
220	MSTRG.1645.1	Os01g0511600	-	Similar to lrgB-like family protein	-	-	-	-	GO:0016020//membrane;GO:0016021//integral component of membrane	-	-
220	MSTRG.1645.1	Os01g0511700	-	Conserved hypothetical protein	-	-	-	-	-	-	-
221	MSTRG.1646.3	Os01g0512200	-	Armadillo-type fold domain containing protein	-	-	-	-	GO:0005623//cell;GO:0005794//Golgi apparatus;GO:0010008//endosome membrane;GO:0016020//membrane;GO:0030117//membrane coat;GO:0030123//AP-3 adaptor complex	-	GO:0006623//protein targeting to vacuole;GO:0006886//intracellular protein transport;GO:0006896//Golgi to vacuole transport;GO:0006903//vesicle targeting;GO:0007032//endosome organization;GO:0015031//protein transport;GO:0016192//vesicle-mediated transport;GO:0080171//lytic vacuole organization;GO:1990019//protein storage vacuole organization
222	MSTRG.1647.1	Os01g0512200	-	Armadillo-type fold domain containing protein	-	-	-	-	GO:0005623//cell;GO:0005794//Golgi apparatus;GO:0010008//endosome membrane;GO:0016020//membrane;GO:0030117//membrane coat;GO:0030123//AP-3 adaptor complex	-	GO:0006623//protein targeting to vacuole;GO:0006886//intracellular protein transport;GO:0006896//Golgi to vacuole transport;GO:0006903//vesicle targeting;GO:0007032//endosome organization;GO:0015031//protein transport;GO:0016192//vesicle-mediated transport;GO:0080171//lytic vacuole organization;GO:1990019//protein storage vacuole organization
223	MSTRG.1653.1	Os01g0513400	-	Protein of unknown function DUF789 family protein	-	-	-	-	-	-	-
223	MSTRG.1653.1	Os01g0513500	-	Hypothetical gene	-	-	-	-	-	-	-
223	MSTRG.1653.1	Os01g0513800	-	Similar to Brix domain containing protein 1 homolog	-	-	-	-	GO:0005634//nucleus;GO:0005730//nucleolus	GO:0019843//rRNA binding	GO:0000027//ribosomal large subunit assembly;GO:0000463//maturation of LSU-rRNA from tricistronic rRNA transcript (SSU-rRNA, 5.8S rRNA, LSU-rRNA);GO:0000470//maturation of LSU-rRNA
223	MSTRG.1653.1	Os01g0513850	-	Hypothetical protein	-	-	-	-	-	-	-
223	MSTRG.1653.1	Os01g0513700	-	Similar to trafficking protein particle complex subunit 1	-	-	-	-	GO:0005783//endoplasmic reticulum;GO:0005794//Golgi apparatus;GO:0005829//cytosol;GO:0030008//TRAPP complex	GO:0017112//Rab guanyl-nucleotide exchange factor activity	GO:0006888//ER to Golgi vesicle-mediated transport;GO:0009555//pollen development;GO:0009933//meristem structural organization;GO:0016192//vesicle-mediated transport
224	MSTRG.1660.1	Os01g0516200	-	Similar to Stress-responsive protein	-	-	-	-	-	-	GO:0009865//pollen tube adhesion
224	MSTRG.1660.1	Os01g0516600	-	Similar to Stable protein 1	-	-	-	-	GO:0005829//cytosol;GO:0005886//plasma membrane	-	GO:0009865//pollen tube adhesion;GO:0042742//defense response to bacterium;GO:0050832//defense response to fungus
225	MSTRG.1662.1	Os01g0516625	-	Hypothetical protein	-	-	-	-	-	-	-
226	MSTRG.1671.1	Os01g0520180	-	Hypothetical conserved gene	-	-	-	-	-	-	-
227	MSTRG.1679.1	Os01g0523100	-	Protein kinase, catalytic domain domain containing protein	-	-	-	-	GO:0016020//membrane;GO:0016021//integral component of membrane	GO:0000166//nucleotide binding;GO:0004672//protein kinase activity;GO:0004674//protein serine/threonine kinase activity;GO:0005515//protein binding;GO:0005524//ATP binding;GO:0016301//kinase activity;GO:0016740//transferase activity	GO:0006468//protein phosphorylation;GO:0016310//phosphorylation
227	MSTRG.1679.1	Os01g0523250	-	Hypothetical protein	-	-	-	-	-	-	-
227	MSTRG.1679.1	Os01g0523401	-	Similar to ribosomal protein S18	Genetic Information Processing	Translation	ko03010//Ribosome	K02963	GO:0005763//mitochondrial small ribosomal subunit;GO:0005840//ribosome;GO:0009507//chloroplast;GO:0009536//plastid	GO:0003723//RNA binding;GO:0003735//structural constituent of ribosome;GO:0019843//rRNA binding;GO:0070181//small ribosomal subunit rRNA binding	GO:0006412//translation
227	MSTRG.1679.1	MSTRG.1678	ndhB1	NADH-plastoquinone oxidoreductase subunit 2 [Plukenetia volubilis]	Metabolism;Metabolism	Global and overview maps;Energy metabolism	ko01100//Metabolic pathways;ko00190//Oxidative phosphorylation	K05573;K05573	GO:0031224//intrinsic component of membrane;GO:0044391//ribosomal subunit;GO:0044434//chloroplast part	GO:0003723//RNA binding;GO:0005198//structural molecule activity;GO:0048037//cofactor binding;GO:0050136//NADH dehydrogenase (quinone) activity	GO:0010467//gene expression;GO:0022904//respiratory electron transport chain;GO:0051234//establishment of localization
228	MSTRG.1680.1	Os01g0523100	-	Protein kinase, catalytic domain domain containing protein	-	-	-	-	GO:0016020//membrane;GO:0016021//integral component of membrane	GO:0000166//nucleotide binding;GO:0004672//protein kinase activity;GO:0004674//protein serine/threonine kinase activity;GO:0005515//protein binding;GO:0005524//ATP binding;GO:0016301//kinase activity;GO:0016740//transferase activity	GO:0006468//protein phosphorylation;GO:0016310//phosphorylation
228	MSTRG.1680.1	Os01g0523250	-	Hypothetical protein	-	-	-	-	-	-	-
228	MSTRG.1680.1	Os01g0523401	-	Similar to ribosomal protein S18	Genetic Information Processing	Translation	ko03010//Ribosome	K02963	GO:0005763//mitochondrial small ribosomal subunit;GO:0005840//ribosome;GO:0009507//chloroplast;GO:0009536//plastid	GO:0003723//RNA binding;GO:0003735//structural constituent of ribosome;GO:0019843//rRNA binding;GO:0070181//small ribosomal subunit rRNA binding	GO:0006412//translation
228	MSTRG.1680.1	MSTRG.1678	ndhB1	NADH-plastoquinone oxidoreductase subunit 2 [Plukenetia volubilis]	Metabolism;Metabolism	Global and overview maps;Energy metabolism	ko01100//Metabolic pathways;ko00190//Oxidative phosphorylation	K05573;K05573	GO:0031224//intrinsic component of membrane;GO:0044391//ribosomal subunit;GO:0044434//chloroplast part	GO:0003723//RNA binding;GO:0005198//structural molecule activity;GO:0048037//cofactor binding;GO:0050136//NADH dehydrogenase (quinone) activity	GO:0010467//gene expression;GO:0022904//respiratory electron transport chain;GO:0051234//establishment of localization
229	MSTRG.1681.1	Os01g0523401	-	Similar to ribosomal protein S18	Genetic Information Processing	Translation	ko03010//Ribosome	K02963	GO:0005763//mitochondrial small ribosomal subunit;GO:0005840//ribosome;GO:0009507//chloroplast;GO:0009536//plastid	GO:0003723//RNA binding;GO:0003735//structural constituent of ribosome;GO:0019843//rRNA binding;GO:0070181//small ribosomal subunit rRNA binding	GO:0006412//translation
229	MSTRG.1681.1	MSTRG.1678	ndhB1	NADH-plastoquinone oxidoreductase subunit 2 [Plukenetia volubilis]	Metabolism;Metabolism	Global and overview maps;Energy metabolism	ko01100//Metabolic pathways;ko00190//Oxidative phosphorylation	K05573;K05573	GO:0031224//intrinsic component of membrane;GO:0044391//ribosomal subunit;GO:0044434//chloroplast part	GO:0003723//RNA binding;GO:0005198//structural molecule activity;GO:0048037//cofactor binding;GO:0050136//NADH dehydrogenase (quinone) activity	GO:0010467//gene expression;GO:0022904//respiratory electron transport chain;GO:0051234//establishment of localization
230	MSTRG.1692.1	Os01g0525800	-	Similar to DVL5	-	-	-	-	-	-	-
230	MSTRG.1692.1	Os01g0526200	-	TRAUB family protein	-	-	-	-	GO:0005634//nucleus;GO:0005730//nucleolus	-	-
231	MSTRG.1693.1	Os01g0526200	-	TRAUB family protein	-	-	-	-	GO:0005634//nucleus;GO:0005730//nucleolus	-	-
232	MSTRG.1694.2	Os01g0526100	-	Similar to splicing factor 45	Genetic Information Processing	Transcription	ko03040//Spliceosome	K12840	GO:0005634//nucleus;GO:0005737//cytoplasm	GO:0003676//nucleic acid binding;GO:0003723//RNA binding	GO:0000380//alternative mRNA splicing, via spliceosome;GO:0000381//regulation of alternative mRNA splicing, via spliceosome;GO:0006281//DNA repair;GO:0043484//regulation of RNA splicing
233	MSTRG.1694.4	Os01g0526100	-	Similar to splicing factor 45	Genetic Information Processing	Transcription	ko03040//Spliceosome	K12840	GO:0005634//nucleus;GO:0005737//cytoplasm	GO:0003676//nucleic acid binding;GO:0003723//RNA binding	GO:0000380//alternative mRNA splicing, via spliceosome;GO:0000381//regulation of alternative mRNA splicing, via spliceosome;GO:0006281//DNA repair;GO:0043484//regulation of RNA splicing
234	MSTRG.1695.1	Os01g0526200	-	TRAUB family protein	-	-	-	-	GO:0005634//nucleus;GO:0005730//nucleolus	-	-
235	MSTRG.1701.1	Os01g0528000	-	Transcription factor IIIC, subunit 5 domain containing protein	-	-	-	-	GO:0000127//transcription factor TFIIIC complex	-	GO:0006384//transcription initiation from RNA polymerase III promoter;GO:0070898//RNA polymerase III transcriptional preinitiation complex assembly
235	MSTRG.1701.1	Os01g0527900	-	Hypothetical conserved gene	-	-	-	-	GO:0005840//ribosome	-	-
235	MSTRG.1701.1	MSTRG.1703	GTF3C5	general transcription factor 3C polypeptide 5 isoform X2 [Oryza sativa Japonica Group]	-	-	-	-	-	-	-
236	MSTRG.1702.1	Os01g0528000	-	Transcription factor IIIC, subunit 5 domain containing protein	-	-	-	-	GO:0000127//transcription factor TFIIIC complex	-	GO:0006384//transcription initiation from RNA polymerase III promoter;GO:0070898//RNA polymerase III transcriptional preinitiation complex assembly
236	MSTRG.1702.1	Os01g0528300	-	Similar to OSIGBa0142C11.3 protein	-	-	-	-	GO:0005737//cytoplasm;GO:0009507//chloroplast	GO:0004664//prephenate dehydratase activity;GO:0047769//arogenate dehydratase activity	GO:0009094//L-phenylalanine biosynthetic process
236	MSTRG.1702.1	Os01g0527900	-	Hypothetical conserved gene	-	-	-	-	GO:0005840//ribosome	-	-
236	MSTRG.1702.1	MSTRG.1703	GTF3C5	general transcription factor 3C polypeptide 5 isoform X2 [Oryza sativa Japonica Group]	-	-	-	-	-	-	-
237	MSTRG.1706.1	Os01g0530300	-	SANT associated domain containing protein	-	-	-	-	-	-	-
237	MSTRG.1706.1	Os01g0530316	-	Non-protein coding transcript	-	-	-	-	-	-	-
238	MSTRG.1707.1	Os01g0530300	-	SANT associated domain containing protein	-	-	-	-	-	-	-
238	MSTRG.1707.1	Os01g0530316	-	Non-protein coding transcript	-	-	-	-	-	-	-
238	MSTRG.1707.1	Os01g0530341	-	Similar to Adenylate cyclase	-	-	-	-	-	-	-
238	MSTRG.1707.1	Os01g0530400	OsGRX5	Thioredoxin fold domain containing protein	-	-	-	-	GO:0005623//cell;GO:0005739//mitochondrion;GO:0005759//mitochondrial matrix	GO:0009055//electron carrier activity;GO:0015035//protein disulfide oxidoreductase activity;GO:0015038//glutathione disulfide oxidoreductase activity;GO:0046872//metal ion binding;GO:0051536//iron-sulfur cluster binding;GO:0051537//2 iron, 2 sulfur cluster binding	GO:0022900//electron transport chain;GO:0045454//cell redox homeostasis;GO:0055114//oxidation-reduction process
238	MSTRG.1707.1	Os01g0530450	-	Similar to Biostress-resistance-related protein (Fragment)	-	-	-	-	-	-	-
238	MSTRG.1707.1	Os01g0530500	Os_F0571	Protein of unknown function DUF295 domain containing protein	-	-	-	-	-	-	-
239	MSTRG.1713.1	Os01g0531300	-	Hypothetical conserved gene	-	-	-	-	GO:0008352//katanin complex	GO:0008568//microtubule-severing ATPase activity	GO:0007019//microtubule depolymerization;GO:0051013//microtubule severing
239	MSTRG.1713.1	Os01g0531400	-	Hypothetical conserved gene	-	-	-	-	GO:0005886//plasma membrane	-	-
239	MSTRG.1713.1	Os01g0531200	-	Phospholipase C, phosphatidylinositol-specific, Y domain domain containing protein	-	-	-	-	-	GO:0004435//phosphatidylinositol phospholipase C activity	GO:0006629//lipid metabolic process;GO:0007165//signal transduction;GO:0035556//intracellular signal transduction
239	MSTRG.1713.1	Os01g0531500	-	Dienelactone hydrolase domain containing protein	-	-	-	-	-	GO:0016787//hydrolase activity	-
240	MSTRG.1728.1	Os01g0533450	-	Similar to RNA-binding protein Nova-1	-	-	-	-	-	GO:0003723//RNA binding	-
240	MSTRG.1728.1	Os01g0533500	OsGSL4	Similar to Callose synthase 1 catalytic subunit	-	-	-	-	GO:0000148//1,3-beta-D-glucan synthase complex;GO:0016020//membrane;GO:0016021//integral component of membrane	GO:0003843//1,3-beta-D-glucan synthase activity	GO:0006075//(1->3)-beta-D-glucan biosynthetic process
240	MSTRG.1728.1	MSTRG.1729	CALS6	callose synthase 7 [Oryza sativa Japonica Group]	-	-	-	-	-	GO:0016757//transferase activity, transferring glycosyl groups	-
240	MSTRG.1728.1	Os01g0533400	OsBgal5	Glycoside hydrolase, family 35 protein	-	-	-	-	GO:0005576//extracellular region;GO:0005618//cell wall;GO:0005773//vacuole;GO:0048046//apoplast	GO:0004553//hydrolase activity, hydrolyzing O-glycosyl compounds;GO:0004565//beta-galactosidase activity;GO:0016787//hydrolase activity;GO:0016798//hydrolase activity, acting on glycosyl bonds;GO:0030246//carbohydrate binding	GO:0005975//carbohydrate metabolic process;GO:0008152//metabolic process
240	MSTRG.1728.1	MSTRG.1732	CALS6	callose synthase 7 [Oryza sativa Japonica Group]	-	-	-	-	-	GO:0016740//transferase activity	-
241	MSTRG.1730.1	Os01g0533450	-	Similar to RNA-binding protein Nova-1	-	-	-	-	-	GO:0003723//RNA binding	-
241	MSTRG.1730.1	Os01g0533500	OsGSL4	Similar to Callose synthase 1 catalytic subunit	-	-	-	-	GO:0000148//1,3-beta-D-glucan synthase complex;GO:0016020//membrane;GO:0016021//integral component of membrane	GO:0003843//1,3-beta-D-glucan synthase activity	GO:0006075//(1->3)-beta-D-glucan biosynthetic process
241	MSTRG.1730.1	MSTRG.1729	CALS6	callose synthase 7 [Oryza sativa Japonica Group]	-	-	-	-	-	GO:0016757//transferase activity, transferring glycosyl groups	-
241	MSTRG.1730.1	Os01g0533800	OsGSL4	Conserved hypothetical protein	-	-	-	-	-	-	-
241	MSTRG.1730.1	Os01g0533400	OsBgal5	Glycoside hydrolase, family 35 protein	-	-	-	-	GO:0005576//extracellular region;GO:0005618//cell wall;GO:0005773//vacuole;GO:0048046//apoplast	GO:0004553//hydrolase activity, hydrolyzing O-glycosyl compounds;GO:0004565//beta-galactosidase activity;GO:0016787//hydrolase activity;GO:0016798//hydrolase activity, acting on glycosyl bonds;GO:0030246//carbohydrate binding	GO:0005975//carbohydrate metabolic process;GO:0008152//metabolic process
241	MSTRG.1730.1	MSTRG.1732	CALS6	callose synthase 7 [Oryza sativa Japonica Group]	-	-	-	-	-	GO:0016740//transferase activity	-
242	MSTRG.1731.1	Os01g0533450	-	Similar to RNA-binding protein Nova-1	-	-	-	-	-	GO:0003723//RNA binding	-
242	MSTRG.1731.1	Os01g0533500	OsGSL4	Similar to Callose synthase 1 catalytic subunit	-	-	-	-	GO:0000148//1,3-beta-D-glucan synthase complex;GO:0016020//membrane;GO:0016021//integral component of membrane	GO:0003843//1,3-beta-D-glucan synthase activity	GO:0006075//(1->3)-beta-D-glucan biosynthetic process
242	MSTRG.1731.1	MSTRG.1729	CALS6	callose synthase 7 [Oryza sativa Japonica Group]	-	-	-	-	-	GO:0016757//transferase activity, transferring glycosyl groups	-
242	MSTRG.1731.1	Os01g0533800	OsGSL4	Conserved hypothetical protein	-	-	-	-	-	-	-
242	MSTRG.1731.1	MSTRG.1732	CALS6	callose synthase 7 [Oryza sativa Japonica Group]	-	-	-	-	-	GO:0016740//transferase activity	-
243	MSTRG.1732.1	Os01g0533500	OsGSL4	Similar to Callose synthase 1 catalytic subunit	-	-	-	-	GO:0000148//1,3-beta-D-glucan synthase complex;GO:0016020//membrane;GO:0016021//integral component of membrane	GO:0003843//1,3-beta-D-glucan synthase activity	GO:0006075//(1->3)-beta-D-glucan biosynthetic process
243	MSTRG.1732.1	MSTRG.1729	CALS6	callose synthase 7 [Oryza sativa Japonica Group]	-	-	-	-	-	GO:0016757//transferase activity, transferring glycosyl groups	-
243	MSTRG.1732.1	Os01g0533800	OsGSL4	Conserved hypothetical protein	-	-	-	-	-	-	-
244	MSTRG.1733.1	Os01g0533500	OsGSL4	Similar to Callose synthase 1 catalytic subunit	-	-	-	-	GO:0000148//1,3-beta-D-glucan synthase complex;GO:0016020//membrane;GO:0016021//integral component of membrane	GO:0003843//1,3-beta-D-glucan synthase activity	GO:0006075//(1->3)-beta-D-glucan biosynthetic process
244	MSTRG.1733.1	MSTRG.1729	CALS6	callose synthase 7 [Oryza sativa Japonica Group]	-	-	-	-	-	GO:0016757//transferase activity, transferring glycosyl groups	-
244	MSTRG.1733.1	Os01g0533800	OsGSL4	Conserved hypothetical protein	-	-	-	-	-	-	-
245	MSTRG.1738.1	Os01g0534800	-	Similar to PRLI-interacting factor K (Fragment)	-	-	-	-	GO:0034098//VCP-NPL4-UFD1 AAA ATPase complex	GO:0031593//polyubiquitin binding	GO:0006511//ubiquitin-dependent protein catabolic process;GO:0030433//ER-associated ubiquitin-dependent protein catabolic process;GO:0071712//ER-associated misfolded protein catabolic process
245	MSTRG.1738.1	Os01g0534700	OsABCB3	ABC transporter, transmembrane domain domain containing protein	Environmental Information Processing	Membrane transport	ko02010//ABC transporters	K05658	GO:0016020//membrane;GO:0016021//integral component of membrane	GO:0000166//nucleotide binding;GO:0005524//ATP binding;GO:0016887//ATPase activity;GO:0042626//ATPase activity, coupled to transmembrane movement of substances	GO:0055085//transmembrane transport
245	MSTRG.1738.1	Os01g0535001	-	Non-protein coding transcript	-	-	-	-	-	-	-
246	MSTRG.1739.1	Os01g0534800	-	Similar to PRLI-interacting factor K (Fragment)	-	-	-	-	GO:0034098//VCP-NPL4-UFD1 AAA ATPase complex	GO:0031593//polyubiquitin binding	GO:0006511//ubiquitin-dependent protein catabolic process;GO:0030433//ER-associated ubiquitin-dependent protein catabolic process;GO:0071712//ER-associated misfolded protein catabolic process
246	MSTRG.1739.1	Os01g0534700	OsABCB3	ABC transporter, transmembrane domain domain containing protein	Environmental Information Processing	Membrane transport	ko02010//ABC transporters	K05658	GO:0016020//membrane;GO:0016021//integral component of membrane	GO:0000166//nucleotide binding;GO:0005524//ATP binding;GO:0016887//ATPase activity;GO:0042626//ATPase activity, coupled to transmembrane movement of substances	GO:0055085//transmembrane transport
246	MSTRG.1739.1	Os01g0535001	-	Non-protein coding transcript	-	-	-	-	-	-	-
247	MSTRG.1740.1	Os01g0534800	-	Similar to PRLI-interacting factor K (Fragment)	-	-	-	-	GO:0034098//VCP-NPL4-UFD1 AAA ATPase complex	GO:0031593//polyubiquitin binding	GO:0006511//ubiquitin-dependent protein catabolic process;GO:0030433//ER-associated ubiquitin-dependent protein catabolic process;GO:0071712//ER-associated misfolded protein catabolic process
247	MSTRG.1740.1	Os01g0534700	OsABCB3	ABC transporter, transmembrane domain domain containing protein	Environmental Information Processing	Membrane transport	ko02010//ABC transporters	K05658	GO:0016020//membrane;GO:0016021//integral component of membrane	GO:0000166//nucleotide binding;GO:0005524//ATP binding;GO:0016887//ATPase activity;GO:0042626//ATPase activity, coupled to transmembrane movement of substances	GO:0055085//transmembrane transport
247	MSTRG.1740.1	Os01g0535001	-	Non-protein coding transcript	-	-	-	-	-	-	-
248	MSTRG.1753.1	Os01g0538650	-	Non-protein coding transcript	-	-	-	-	-	-	-
249	MSTRG.1767.1	Os01g0542700	OsbZIP04	bZIP transcription factor, bZIP-1 domain containing protein	-	-	-	-	GO:0005634//nucleus	GO:0003700//transcription factor activity, sequence-specific DNA binding;GO:0043565//sequence-specific DNA binding;GO:0044212//transcription regulatory region DNA binding	GO:0006355//regulation of transcription, DNA-templated;GO:0045893//positive regulation of transcription, DNA-templated
250	MSTRG.1769.1	Os01g0543000	-	Hypothetical gene	-	-	-	-	-	-	-
251	MSTRG.1770.2	Os01g0542700	OsbZIP04	bZIP transcription factor, bZIP-1 domain containing protein	-	-	-	-	GO:0005634//nucleus	GO:0003700//transcription factor activity, sequence-specific DNA binding;GO:0043565//sequence-specific DNA binding;GO:0044212//transcription regulatory region DNA binding	GO:0006355//regulation of transcription, DNA-templated;GO:0045893//positive regulation of transcription, DNA-templated
252	MSTRG.1770.3	Os01g0542700	OsbZIP04	bZIP transcription factor, bZIP-1 domain containing protein	-	-	-	-	GO:0005634//nucleus	GO:0003700//transcription factor activity, sequence-specific DNA binding;GO:0043565//sequence-specific DNA binding;GO:0044212//transcription regulatory region DNA binding	GO:0006355//regulation of transcription, DNA-templated;GO:0045893//positive regulation of transcription, DNA-templated
253	MSTRG.1770.4	Os01g0542700	OsbZIP04	bZIP transcription factor, bZIP-1 domain containing protein	-	-	-	-	GO:0005634//nucleus	GO:0003700//transcription factor activity, sequence-specific DNA binding;GO:0043565//sequence-specific DNA binding;GO:0044212//transcription regulatory region DNA binding	GO:0006355//regulation of transcription, DNA-templated;GO:0045893//positive regulation of transcription, DNA-templated
254	MSTRG.1778.2	Os01g0544450	OsMCM4	Similar to DNA replication licensing factor mcm4	Genetic Information Processing	Replication and repair	ko03030//DNA replication	K02212	GO:0000347//THO complex;GO:0005634//nucleus;GO:0005829//cytosol;GO:0042555//MCM complex	GO:0000166//nucleotide binding;GO:0003677//DNA binding;GO:0003678//DNA helicase activity;GO:0003688//DNA replication origin binding;GO:0003697//single-stranded DNA binding;GO:0004386//helicase activity;GO:0005524//ATP binding;GO:0016787//hydrolase activity;GO:0046872//metal ion binding	GO:0000727//double-strand break repair via break-induced replication;GO:0006260//DNA replication;GO:0006267//pre-replicative complex assembly involved in nuclear cell cycle DNA replication;GO:0006268//DNA unwinding involved in DNA replication;GO:0006270//DNA replication initiation;GO:0006271//DNA strand elongation involved in DNA replication;GO:0007049//cell cycle;GO:0009555//pollen development;G…
255	MSTRG.1778.4	Os01g0544450	OsMCM4	Similar to DNA replication licensing factor mcm4	Genetic Information Processing	Replication and repair	ko03030//DNA replication	K02212	GO:0000347//THO complex;GO:0005634//nucleus;GO:0005829//cytosol;GO:0042555//MCM complex	GO:0000166//nucleotide binding;GO:0003677//DNA binding;GO:0003678//DNA helicase activity;GO:0003688//DNA replication origin binding;GO:0003697//single-stranded DNA binding;GO:0004386//helicase activity;GO:0005524//ATP binding;GO:0016787//hydrolase activity;GO:0046872//metal ion binding	GO:0000727//double-strand break repair via break-induced replication;GO:0006260//DNA replication;GO:0006267//pre-replicative complex assembly involved in nuclear cell cycle DNA replication;GO:0006268//DNA unwinding involved in DNA replication;GO:0006270//DNA replication initiation;GO:0006271//DNA strand elongation involved in DNA replication;GO:0007049//cell cycle;GO:0009555//pollen development;G…
256	MSTRG.1794.1	MSTRG.1792	ycf4	photosystem I assembly protein Ycf4 [Oryza sativa Japonica Group]	-	-	-	-	GO:0009521//photosystem;GO:0016021//integral component of membrane;GO:0044434//chloroplast part	GO:0046906//tetrapyrrole binding;GO:0046914//transition metal ion binding	GO:0044237//cellular metabolic process
256	MSTRG.1794.1	MSTRG.1793	petA	cytochrome f [Secale cereale]	Metabolism;Metabolism	Global and overview maps;Energy metabolism	ko01100//Metabolic pathways;ko00195//Photosynthesis	K02634;K02634	GO:0016021//integral component of membrane;GO:0034357//photosynthetic membrane;GO:0044434//chloroplast part	GO:0043169//cation binding;GO:0046906//tetrapyrrole binding	GO:0044237//cellular metabolic process;GO:0044710//single-organism metabolic process
257	MSTRG.1820.1	Os01g0552850	-	Similar to E3 SUMO-protein ligase SIZ2	-	-	-	-	-	-	-
257	MSTRG.1820.1	Os01g0553200	-	Conserved hypothetical protein	-	-	-	-	-	-	-
258	MSTRG.1823.1	Os01g0553400	OsFbox017	Cyclin-like F-box domain containing protein	-	-	-	-	-	GO:0005515//protein binding	-
259	MSTRG.1827.1	MSTRG.1828	--	Os11g0115532 [Oryza sativa Japonica Group]	-	-	-	-	GO:0031461//cullin-RING ubiquitin ligase complex	GO:0005515//protein binding	GO:0043161//proteasome-mediated ubiquitin-dependent protein catabolic process;GO:0044773//mitotic DNA damage checkpoint
260	MSTRG.1829.1	MSTRG.1828	--	Os11g0115532 [Oryza sativa Japonica Group]	-	-	-	-	GO:0031461//cullin-RING ubiquitin ligase complex	GO:0005515//protein binding	GO:0043161//proteasome-mediated ubiquitin-dependent protein catabolic process;GO:0044773//mitotic DNA damage checkpoint
260	MSTRG.1829.1	Os01g0553901	-	HGWP repeat domain containing protein	-	-	-	-	-	-	-
261	MSTRG.1830.1	MSTRG.1828	--	Os11g0115532 [Oryza sativa Japonica Group]	-	-	-	-	GO:0031461//cullin-RING ubiquitin ligase complex	GO:0005515//protein binding	GO:0043161//proteasome-mediated ubiquitin-dependent protein catabolic process;GO:0044773//mitotic DNA damage checkpoint
262	MSTRG.1831.1	MSTRG.1828	--	Os11g0115532 [Oryza sativa Japonica Group]	-	-	-	-	GO:0031461//cullin-RING ubiquitin ligase complex	GO:0005515//protein binding	GO:0043161//proteasome-mediated ubiquitin-dependent protein catabolic process;GO:0044773//mitotic DNA damage checkpoint
263	MSTRG.1832.1	MSTRG.1828	--	Os11g0115532 [Oryza sativa Japonica Group]	-	-	-	-	GO:0031461//cullin-RING ubiquitin ligase complex	GO:0005515//protein binding	GO:0043161//proteasome-mediated ubiquitin-dependent protein catabolic process;GO:0044773//mitotic DNA damage checkpoint
264	MSTRG.1833.1	MSTRG.1828	--	Os11g0115532 [Oryza sativa Japonica Group]	-	-	-	-	GO:0031461//cullin-RING ubiquitin ligase complex	GO:0005515//protein binding	GO:0043161//proteasome-mediated ubiquitin-dependent protein catabolic process;GO:0044773//mitotic DNA damage checkpoint
265	MSTRG.1834.1	Os01g0554150	-	Transposase, MuDR, plant domain containing protein	-	-	-	-	-	-	-
265	MSTRG.1834.1	Os01g0554400	-	Non-protein coding transcript	-	-	-	-	-	-	-
266	MSTRG.1835.1	Os01g0554400	-	Non-protein coding transcript	-	-	-	-	-	-	-
267	MSTRG.1836.1	Os01g0554400	-	Non-protein coding transcript	-	-	-	-	-	-	-
267	MSTRG.1836.1	MSTRG.1837	--	OSIGBa0126B18.5 [Oryza sativa]	-	-	-	-	-	-	-
268	MSTRG.1843.1	Os01g0556201	-	Hypothetical gene	-	-	-	-	-	-	-
268	MSTRG.1843.1	Os01g0556400	OsDjC9	Heat shock protein DnaJ family protein	Genetic Information Processing	Folding, sorting and degradation	ko04141//Protein processing in endoplasmic reticulum	K09518	GO:0005789//endoplasmic reticulum membrane	GO:0030544//Hsp70 protein binding	GO:0030433//ER-associated ubiquitin-dependent protein catabolic process;GO:0051085//chaperone mediated protein folding requiring cofactor;GO:0071218//cellular response to misfolded protein
269	MSTRG.1869.1	MSTRG.1867	--	erythrocyte binding protein -like [Oryza sativa Japonica Group]	-	-	-	-	-	-	-
269	MSTRG.1869.1	MSTRG.1868	TY3B-G	OSIGBa0158F05.6 [Oryza sativa]	-	-	-	-	GO:0043231//intracellular membrane-bounded organelle	-	GO:0010466//negative regulation of peptidase activity
269	MSTRG.1869.1	MSTRG.1870	--	OSJNBb0002J11.5 [Oryza sativa Japonica Group]	-	-	-	-	GO:0043231//intracellular membrane-bounded organelle	-	GO:0010466//negative regulation of peptidase activity
270	MSTRG.1884.1	Os01g0563000	OsFKBP73	Hypothetical conserved gene	-	-	-	-	GO:0005737//cytoplasm	GO:0003755//peptidyl-prolyl cis-trans isomerase activity;GO:0005515//protein binding;GO:0016853//isomerase activity	GO:0000413//protein peptidyl-prolyl isomerization;GO:0061077//chaperone-mediated protein folding
271	MSTRG.1897.2	Os01g0565600	-	Protein of unknown function DUF866, eukaryotic family protein	-	-	-	-	-	-	-
271	MSTRG.1897.2	Os01g0565800	-	Protein of unknown function DUF538 family protein	-	-	-	-	-	-	-
271	MSTRG.1897.2	Os01g0566000	-	Armadillo-like helical domain containing protein	-	-	-	-	GO:0005737//cytoplasm	GO:0008408//3'-5' exonuclease activity	GO:0090305//nucleic acid phosphodiester bond hydrolysis
271	MSTRG.1897.2	Os01g0566100	OsELF3.2	Conserved hypothetical protein	Organismal Systems	Environmental adaptation	ko04712//Circadian rhythm - plant	K12125	GO:0005634//nucleus	-	GO:0009908//flower development;GO:2000028//regulation of photoperiodism, flowering
272	MSTRG.1902.1	Os01g0566701	OsbHLH117	Non-protein coding transcript	-	-	-	-	-	-	-
272	MSTRG.1902.1	Os01g0566800	OsbHLH117	Hypothetical conserved gene	-	-	-	-	-	GO:0046983//protein dimerization activity	GO:0006355//regulation of transcription, DNA-templated
272	MSTRG.1902.1	Os01g0566900	-	Similar to 3'-5' exonuclease domain-containing protein-like	-	-	-	-	-	GO:0003676//nucleic acid binding;GO:0003723//RNA binding;GO:0008408//3'-5' exonuclease activity	GO:0006139//nucleobase-containing compound metabolic process;GO:0090305//nucleic acid phosphodiester bond hydrolysis
273	MSTRG.1903.1	Os01g0566800	OsbHLH117	Hypothetical conserved gene	-	-	-	-	-	GO:0046983//protein dimerization activity	GO:0006355//regulation of transcription, DNA-templated
274	MSTRG.1909.1	Os01g0568400	-	Hypothetical conserved gene	-	-	-	-	-	GO:0004672//protein kinase activity;GO:0005524//ATP binding	GO:0006468//protein phosphorylation
275	MSTRG.1922.1	Os01g0571766	-	Conserved hypothetical protein	-	-	-	-	-	-	-
275	MSTRG.1922.1	Os01g0571800	-	Lateral organ boundaries, LOB domain containing protein	-	-	-	-	-	-	-
275	MSTRG.1922.1	Os01g0572100	OsC3H7	Zinc finger, CCCH-type domain containing protein	-	-	-	-	GO:0005634//nucleus	GO:0001162//RNA polymerase II intronic transcription regulatory region sequence-specific DNA binding;GO:0003700//transcription factor activity, sequence-specific DNA binding;GO:0046872//metal ion binding	GO:0045892//negative regulation of transcription, DNA-templated
276	MSTRG.1936.1	Os01g0575400	-	Similar to protein kinase family protein	-	-	-	-	GO:0005634//nucleus	GO:0004672//protein kinase activity;GO:0004693//cyclin-dependent protein serine/threonine kinase activity;GO:0005524//ATP binding	GO:0006468//protein phosphorylation;GO:0051301//cell division;GO:0051726//regulation of cell cycle
277	MSTRG.1937.1	Os01g0575400	-	Similar to protein kinase family protein	-	-	-	-	GO:0005634//nucleus	GO:0004672//protein kinase activity;GO:0004693//cyclin-dependent protein serine/threonine kinase activity;GO:0005524//ATP binding	GO:0006468//protein phosphorylation;GO:0051301//cell division;GO:0051726//regulation of cell cycle
277	MSTRG.1937.1	Os01g0575500	OsWD40-16	Similar to predicted protein	-	-	-	-	GO:0005886//plasma membrane;GO:0030136//clathrin-coated vesicle	GO:0005515//protein binding	GO:0000911//cytokinesis by cell plate formation;GO:0009825//multidimensional cell growth;GO:0010235//guard mother cell cytokinesis;GO:0045824//negative regulation of innate immune response
278	MSTRG.1947.1	Os01g0579900	-	Esterase/lipase/thioesterase domain containing protein	-	-	-	-	-	-	-
278	MSTRG.1947.1	Os01g0580000	-	Esterase/lipase/thioesterase domain containing protein	-	-	-	-	-	-	-
278	MSTRG.1947.1	Os01g0579600	OsCBL9	Similar to Calcineurin B-like protein 9	-	-	-	-	-	GO:0005509//calcium ion binding	-
279	MSTRG.1961.2	Os01g0581800	-	Hypothetical conserved gene	-	-	-	-	-	-	-
280	MSTRG.1966.1	Os01g0584032	-	Similar to skin secretory protein xP2	-	-	-	-	-	-	-
280	MSTRG.1966.1	Os01g0584100	-	Similar to hydroxyproline-rich glycoprotein family protein	-	-	-	-	-	-	-
280	MSTRG.1966.1	Os01g0584200	-	Similar to Myosin XI-K headless derivative (Fragment)	-	-	-	-	GO:0005623//cell;GO:0005737//cytoplasm;GO:0015629//actin cytoskeleton;GO:0031982//vesicle	GO:0000146//microfilament motor activity;GO:0030898//actin-dependent ATPase activity;GO:0051015//actin filament binding	GO:0007015//actin filament organization;GO:0030050//vesicle transport along actin filament
280	MSTRG.1966.1	Os01g0584300	-	Conserved hypothetical protein	-	-	-	-	-	-	-
281	MSTRG.1973.1	Os01g0585200	-	Similar to cDNA clone:J023088C01, full insert sequence	-	-	-	-	GO:0016020//membrane;GO:0016021//integral component of membrane	-	-
281	MSTRG.1973.1	Os01g0585300	-	Protein of unknown function DUF1118 family protein	-	-	-	-	GO:0009507//chloroplast;GO:0009515//granal stacked thylakoid;GO:0009534//chloroplast thylakoid;GO:0009535//chloroplast thylakoid membrane;GO:0016020//membrane;GO:0016021//integral component of membrane	-	GO:0010027//thylakoid membrane organization;GO:0010196//nonphotochemical quenching;GO:0090391//granum assembly
281	MSTRG.1973.1	Os01g0585400	-	Similar to DDB1A (DAMAGED DNA BINDING PROTEIN 1A); DNA binding / protein binding	Genetic Information Processing;Genetic Information Processing	Folding, sorting and degradation;Replication and repair	ko04120//Ubiquitin mediated proteolysis;ko03420//Nucleotide excision repair	K10610;K10610	-	-	-
282	MSTRG.1981.1	Os01g0585700	-	SIT4 phosphatase-associated protein family protein	-	-	-	-	-	GO:0019888//protein phosphatase regulator activity;GO:0019903//protein phosphatase binding	GO:0043666//regulation of phosphoprotein phosphatase activity
282	MSTRG.1981.1	MSTRG.1982	--	Os02g0165900 [Oryza sativa Japonica Group]	-	-	-	-	-	-	-
282	MSTRG.1981.1	Os01g0586000	-	Similar to H0714H04.7 protein	-	-	-	-	-	GO:0019888//protein phosphatase regulator activity;GO:0019903//protein phosphatase binding	GO:0043666//regulation of phosphoprotein phosphatase activity
283	MSTRG.1988.1	Os01g0587300	-	Similar to C2 domain-containing protein	-	-	-	-	GO:0005829//cytosol;GO:0005886//plasma membrane;GO:0009506//plasmodesma;GO:0016021//integral component of membrane	GO:0016757//transferase activity, transferring glycosyl groups	GO:0009911//positive regulation of flower development;GO:0099402//plant organ development
283	MSTRG.1988.1	Os01g0587500	-	Heat shock protein Hsp20 domain containing protein	-	-	-	-	GO:0016021//integral component of membrane	-	-
284	MSTRG.2001.1	Os01g0589000	-	Nucleic acid-binding, OB-fold domain containing protein	Genetic Information Processing	Translation	ko03010//Ribosome	K02945	GO:0005840//ribosome	GO:0003676//nucleic acid binding	-
284	MSTRG.2001.1	Os01g0589300	-	Similar to Single myb histone 1	-	-	-	-	GO:0000786//nucleosome;GO:0005634//nucleus	GO:0003677//DNA binding	GO:0006334//nucleosome assembly
284	MSTRG.2001.1	Os01g0589400	-	Pentatricopeptide repeat domain containing protein	-	-	-	-	GO:0043231//intracellular membrane-bounded organelle	GO:0005515//protein binding	GO:0009451//RNA modification
284	MSTRG.2001.1	Os01g0589200	-	Similar to Embryo-abundant protein EMB-like	-	-	-	-	-	-	-
285	MSTRG.2008.1	Os01g0589500	-	Uncharacterised conserved protein UCP009193 domain containing protein	-	-	-	-	-	-	-
285	MSTRG.2008.1	Os01g0589700	-	Conserved hypothetical protein	-	-	-	-	-	-	GO:0009642//response to light intensity
285	MSTRG.2008.1	Os01g0589800	-	Similar to OHP2	-	-	-	-	GO:0009535//chloroplast thylakoid membrane	-	-
285	MSTRG.2008.1	Os01g0590100	-	Conserved hypothetical protein	-	-	-	-	-	-	-
286	MSTRG.2014.1	MSTRG.2013	--	Os08g0481151 [Oryza sativa Japonica Group]	-	-	-	-	GO:0043231//intracellular membrane-bounded organelle	-	GO:0010466//negative regulation of peptidase activity
286	MSTRG.2014.1	MSTRG.2012	--	OSJNBa0036B17.6 [Oryza sativa Japonica Group]	-	-	-	-	-	-	-
287	MSTRG.2043.1	Os01g0596600	-	FBD domain containing protein	-	-	-	-	-	-	-
287	MSTRG.2043.1	Os01g0596700	-	FBD domain containing protein	-	-	-	-	-	GO:0016829//lyase activity	-
288	MSTRG.2046.1	Os01g0597600	OsATL15	Amino acid transporter, transmembrane domain containing protein	-	-	-	-	GO:0005886//plasma membrane;GO:0016021//integral component of membrane	GO:0015171//amino acid transmembrane transporter activity	GO:0003333//amino acid transmembrane transport
288	MSTRG.2046.1	Os01g0597701	-	Hypothetical conserved gene	-	-	-	-	-	-	-
288	MSTRG.2046.1	Os01g0598000	-	Similar to UDP-glycosyltransferase UGT703A5	Metabolism;Metabolism	Global and overview maps;Biosynthesis of other secondary metabolites	ko01110//Biosynthesis of secondary metabolites;ko00940//Phenylpropanoid biosynthesis	K23260;K23260	GO:0043231//intracellular membrane-bounded organelle	GO:0008194//UDP-glycosyltransferase activity;GO:0016740//transferase activity;GO:0016757//transferase activity, transferring glycosyl groups;GO:0016758//transferase activity, transferring hexosyl groups;GO:0080043//quercetin 3-O-glucosyltransferase activity;GO:0080044//quercetin 7-O-glucosyltransferase activity	-
289	MSTRG.2051.1	Os01g0598900	-	Cytoplasmic tRNA 2-thiolation protein 1	Genetic Information Processing	Folding, sorting and degradation	ko04122//Sulfur relay system	K14168	GO:0002144//cytosolic tRNA wobble base thiouridylase complex	GO:0000049//tRNA binding	GO:0002098//tRNA wobble uridine modification;GO:0002143//tRNA wobble position uridine thiolation;GO:0008033//tRNA processing;GO:0034227//tRNA thio-modification
289	MSTRG.2051.1	Os01g0599900	-	Similar to membrane protein-like	-	-	-	-	GO:0005737//cytoplasm;GO:0016020//membrane	-	GO:0034975//protein folding in endoplasmic reticulum
289	MSTRG.2051.1	Os01g0600000	-	Similar to Copia-like retroelement pol polyprotein	Metabolism;Metabolism	Global and overview maps;Energy metabolism	ko01100//Metabolic pathways;ko00190//Oxidative phosphorylation	K02140;K02140	GO:0000276//mitochondrial proton-transporting ATP synthase complex, coupling factor F(o)	GO:0015078//hydrogen ion transmembrane transporter activity	GO:0015986//ATP synthesis coupled proton transport
290	MSTRG.2070.1	Os01g0603300	-	Similar to MCB2 protein	-	-	-	-	GO:0005634//nucleus	GO:0003677//DNA binding	-
290	MSTRG.2070.1	Os01g0603500	-	Similar to Cf2/Cf5-like disease resistance protein (Fragment)	-	-	-	-	GO:0016021//integral component of membrane	GO:0005515//protein binding	-
290	MSTRG.2070.1	Os01g0603700	-	Hypothetical gene	-	-	-	-	-	-	-
290	MSTRG.2070.1	Os01g0603800	OsSTA22	Similar to Triticum sp. (pAWJL3) leucine rich repeat region mRNA (Fragment)	-	-	-	-	-	GO:0005515//protein binding	-
291	MSTRG.2072.1	Os01g0603300	-	Similar to MCB2 protein	-	-	-	-	GO:0005634//nucleus	GO:0003677//DNA binding	-
291	MSTRG.2072.1	Os01g0603700	-	Hypothetical gene	-	-	-	-	-	-	-
291	MSTRG.2072.1	Os01g0603800	OsSTA22	Similar to Triticum sp. (pAWJL3) leucine rich repeat region mRNA (Fragment)	-	-	-	-	-	GO:0005515//protein binding	-
292	MSTRG.2085.1	Os01g0604700	-	Similar to cDNA clone:001-043-A08, full insert sequence	-	-	-	-	GO:0016021//integral component of membrane	-	-
292	MSTRG.2085.1	Os01g0604900	OsSTA24	Hypothetical protein	-	-	-	-	-	-	-
292	MSTRG.2085.1	Os01g0605000	-	Hypothetical protein	-	-	-	-	-	-	-
292	MSTRG.2085.1	Os01g0605100	-	Similar to BCS1 protein-like protein	-	-	-	-	-	GO:0000166//nucleotide binding;GO:0005524//ATP binding	-
293	MSTRG.2086.1	Os01g0605000	-	Hypothetical protein	-	-	-	-	-	-	-
293	MSTRG.2086.1	Os01g0605100	-	Similar to BCS1 protein-like protein	-	-	-	-	-	GO:0000166//nucleotide binding;GO:0005524//ATP binding	-
294	MSTRG.2088.1	Os01g0604900	OsSTA24	Hypothetical protein	-	-	-	-	-	-	-
294	MSTRG.2088.1	Os01g0605000	-	Hypothetical protein	-	-	-	-	-	-	-
294	MSTRG.2088.1	Os01g0605100	-	Similar to BCS1 protein-like protein	-	-	-	-	-	GO:0000166//nucleotide binding;GO:0005524//ATP binding	-
295	MSTRG.2127.1	Os01g0612425	-	Hypothetical protein	-	-	-	-	-	-	-
295	MSTRG.2127.1	Os01g0612600	-	Protein of unknown function DUF1644 family protein	-	-	-	-	-	-	-
296	MSTRG.2147.1	Os01g0614900	OsATG7	NAD(P)-binding domain containing protein	Cellular Processes	Transport and catabolism	ko04136//Autophagy - other eukaryotes	K08337	GO:0000407//pre-autophagosomal structure;GO:0005737//cytoplasm	GO:0008641//small protein activating enzyme activity;GO:0019778//Atg12 activating enzyme activity;GO:0019779//Atg8 activating enzyme activity	GO:0000045//autophagosome assembly;GO:0000422//mitophagy;GO:0006501//C-terminal protein lipidation;GO:0006914//autophagy;GO:0006995//cellular response to nitrogen starvation;GO:0032446//protein modification by small protein conjugation;GO:0034727//piecemeal microautophagy of nucleus;GO:0044805//late nucleophagy
296	MSTRG.2147.1	Os01g0615000	-	Hypothetical protein	-	-	-	-	-	-	-
296	MSTRG.2147.1	Os01g0615100	OCPI2	Chymotrypsin protease inhibitor, Salt and osmotic stress toleranc	-	-	-	-	-	GO:0004867//serine-type endopeptidase inhibitor activity;GO:0008233//peptidase activity	GO:0009611//response to wounding;GO:0010951//negative regulation of endopeptidase activity
296	MSTRG.2147.1	Os01g0615300	OsAT1	Transferase family protein	-	-	-	-	-	GO:0016410//N-acyltransferase activity;GO:0016747//transferase activity, transferring acyl groups other than amino-acyl groups	-
296	MSTRG.2147.1	Os01g0615400	-	Hypothetical protein	-	-	-	-	-	-	-
296	MSTRG.2147.1	Os01g0615200	OsAT2	Transferase family protein	-	-	-	-	-	GO:0016410//N-acyltransferase activity;GO:0016747//transferase activity, transferring acyl groups other than amino-acyl groups	-
296	MSTRG.2147.1	Os01g0615250	-	Hypothetical protein	-	-	-	-	-	-	-
297	MSTRG.2155.5	Os01g0616500	-	Similar to 50S ribosomal protein L22	Genetic Information Processing	Translation	ko03010//Ribosome	K02890	GO:0005762//mitochondrial large ribosomal subunit;GO:0005840//ribosome;GO:0015934//large ribosomal subunit	GO:0003735//structural constituent of ribosome	GO:0006412//translation;GO:0042255//ribosome assembly
297	MSTRG.2155.5	Os01g0616300	-	Thioredoxin, core domain containing protein	-	-	-	-	GO:0005623//cell;GO:0005737//cytoplasm	-	GO:0045454//cell redox homeostasis
297	MSTRG.2155.5	Os01g0616366	-	Hypothetical protein	-	-	-	-	-	-	-
298	MSTRG.2163.1	Os01g0617600	-	Plant organelle RNA recognition domain domain containing protein	-	-	-	-	-	-	-
299	MSTRG.2166.1	Os01g0617600	-	Plant organelle RNA recognition domain domain containing protein	-	-	-	-	-	-	-
299	MSTRG.2166.1	Os01g0617650	-	Similar to AAP4; acidic amino acid transmembrane transporter/ amino acid transmembrane transporter/ neutral amino acid transmembrane transporter/ primary active transmembrane transporter	-	-	-	-	GO:0016020//membrane;GO:0016021//integral component of membrane	-	-
299	MSTRG.2166.1	Os01g0617800	-	Conserved hypothetical protein	-	-	-	-	-	-	-
300	MSTRG.2167.1	Os01g0617800	-	Conserved hypothetical protein	-	-	-	-	-	-	-
300	MSTRG.2167.1	Os01g0617900	-	Similar to oxygen-evolving complex-related	-	-	-	-	GO:0009523//photosystem II;GO:0009654//photosystem II oxygen evolving complex;GO:0019898//extrinsic component of membrane	GO:0005509//calcium ion binding	GO:0015979//photosynthesis
300	MSTRG.2167.1	Os01g0617950	-	Non-protein coding transcript	-	-	-	-	-	-	-
300	MSTRG.2167.1	Os01g0618000	-	Exonuclease domain containing protein	-	-	-	-	-	GO:0000175//3'-5'-exoribonuclease activity;GO:0003676//nucleic acid binding;GO:0008310//single-stranded DNA 3'-5' exodeoxyribonuclease activity	GO:0006259//DNA metabolic process;GO:0090305//nucleic acid phosphodiester bond hydrolysis;GO:0090503//RNA phosphodiester bond hydrolysis, exonucleolytic
301	MSTRG.2174.1	Os01g0618100	-	Similar to IN2-2 protein	-	-	-	-	-	-	-
301	MSTRG.2174.1	Os01g0618300	-	Armadillo-type fold domain containing protein	-	-	-	-	GO:0016021//integral component of membrane	-	-
301	MSTRG.2174.1	Os01g0618000	-	Exonuclease domain containing protein	-	-	-	-	-	GO:0000175//3'-5'-exoribonuclease activity;GO:0003676//nucleic acid binding;GO:0008310//single-stranded DNA 3'-5' exodeoxyribonuclease activity	GO:0006259//DNA metabolic process;GO:0090305//nucleic acid phosphodiester bond hydrolysis;GO:0090503//RNA phosphodiester bond hydrolysis, exonucleolytic
302	MSTRG.2186.1	Os01g0619900	OsTCL2	Similar to DNA binding	-	-	-	-	-	-	-
302	MSTRG.2186.1	Os01g0620100	OsWD40-19	WD40 repeat-like domain containing protein	Genetic Information Processing	Translation	ko03013//RNA transport	K14299	GO:0005635//nuclear envelope;GO:0031080//nuclear pore outer ring;GO:0035859//Seh1-associated complex	GO:0005198//structural molecule activity;GO:0005515//protein binding	GO:0015031//protein transport;GO:0034198//cellular response to amino acid starvation;GO:0034629//cellular protein complex localization;GO:1904263//positive regulation of TORC1 signaling
303	MSTRG.2208.1	Os01g0622400	-	Hypothetical conserved gene	-	-	-	-	-	-	-
303	MSTRG.2208.1	Os01g0622700	-	Similar to Protein ABIL1	-	-	-	-	GO:0005737//cytoplasm;GO:0005856//cytoskeleton	-	-
303	MSTRG.2208.1	Os01g0622800	-	Hypothetical protein	-	-	-	-	-	-	-
303	MSTRG.2208.1	Os01g0622901	-	Hypothetical conserved gene	-	-	-	-	-	-	-
303	MSTRG.2208.1	Os01g0622500	-	Hypothetical gene	-	-	-	-	-	-	-
304	MSTRG.2222.1	Os01g0625900	OsOFP2	Ovate Family Protein, Hormonal homeostasis, Vasculature developmen	-	-	-	-	-	-	GO:0045892//negative regulation of transcription, DNA-templated
304	MSTRG.2222.1	Os01g0626032	-	Non-protein coding transcript	-	-	-	-	-	-	-
304	MSTRG.2222.1	Os01g0626100	-	Armadillo-like helical domain containing protein	-	-	-	-	GO:0016020//membrane;GO:0030117//membrane coat	-	GO:0006886//intracellular protein transport;GO:0015031//protein transport;GO:0016192//vesicle-mediated transport
305	MSTRG.2223.1	Os01g0626032	-	Non-protein coding transcript	-	-	-	-	-	-	-
305	MSTRG.2223.1	Os01g0626100	-	Armadillo-like helical domain containing protein	-	-	-	-	GO:0016020//membrane;GO:0030117//membrane coat	-	GO:0006886//intracellular protein transport;GO:0015031//protein transport;GO:0016192//vesicle-mediated transport
305	MSTRG.2223.1	Os01g0626200	-	Clathrin adaptor, beta-adaptin, appendage, C-terminal subdomain domain containing protein	-	-	-	-	GO:0030131//clathrin adaptor complex	-	GO:0006886//intracellular protein transport;GO:0016192//vesicle-mediated transport
306	MSTRG.2224.1	Os01g0626032	-	Non-protein coding transcript	-	-	-	-	-	-	-
306	MSTRG.2224.1	Os01g0626100	-	Armadillo-like helical domain containing protein	-	-	-	-	GO:0016020//membrane;GO:0030117//membrane coat	-	GO:0006886//intracellular protein transport;GO:0015031//protein transport;GO:0016192//vesicle-mediated transport
306	MSTRG.2224.1	Os01g0626200	-	Clathrin adaptor, beta-adaptin, appendage, C-terminal subdomain domain containing protein	-	-	-	-	GO:0030131//clathrin adaptor complex	-	GO:0006886//intracellular protein transport;GO:0016192//vesicle-mediated transport
306	MSTRG.2224.1	Os01g0626300	-	Similar to Mitochondrial import receptor subunit TOM7-1 (Translocase of outer membrane 7 kDa subunit 1)	-	-	-	-	GO:0005742//mitochondrial outer membrane translocase complex	-	GO:0030150//protein import into mitochondrial matrix
306	MSTRG.2224.1	Os01g0626350	-	Non-protein coding transcript	-	-	-	-	-	-	-
307	MSTRG.2229.1	Os01g0626400	WRKY11	WRKY transcription factor, Control of flowering time and plant heigh	-	-	-	-	GO:0005634//nucleus	GO:0003677//DNA binding;GO:0003700//transcription factor activity, sequence-specific DNA binding;GO:0043565//sequence-specific DNA binding	GO:0006355//regulation of transcription, DNA-templated
307	MSTRG.2229.1	Os01g0626900	-	Helix-loop-helix DNA-binding domain containing protein	-	-	-	-	GO:0005634//nucleus	GO:0001228//transcriptional activator activity, RNA polymerase II transcription regulatory region sequence-specific binding;GO:0046983//protein dimerization activity	GO:0045944//positive regulation of transcription from RNA polymerase II promoter
308	MSTRG.2229.2	Os01g0626400	WRKY11	WRKY transcription factor, Control of flowering time and plant heigh	-	-	-	-	GO:0005634//nucleus	GO:0003677//DNA binding;GO:0003700//transcription factor activity, sequence-specific DNA binding;GO:0043565//sequence-specific DNA binding	GO:0006355//regulation of transcription, DNA-templated
308	MSTRG.2229.2	Os01g0626900	-	Helix-loop-helix DNA-binding domain containing protein	-	-	-	-	GO:0005634//nucleus	GO:0001228//transcriptional activator activity, RNA polymerase II transcription regulatory region sequence-specific binding;GO:0046983//protein dimerization activity	GO:0045944//positive regulation of transcription from RNA polymerase II promoter
309	MSTRG.2230.2	Os01g0626500	-	Conserved hypothetical protein	-	-	-	-	-	-	-
309	MSTRG.2230.2	Os01g0627400	OsCYP72A17	Similar to Cytochrome P450 monooxygenase CYP72A5 (Fragment)	-	-	-	-	GO:0016021//integral component of membrane	GO:0004497//monooxygenase activity;GO:0005506//iron ion binding;GO:0016491//oxidoreductase activity;GO:0016705//oxidoreductase activity, acting on paired donors, with incorporation or reduction of molecular oxygen;GO:0020037//heme binding;GO:0046872//metal ion binding	GO:0055114//oxidation-reduction process
309	MSTRG.2230.2	Os01g0627450	-	Hypothetical protein	-	-	-	-	-	-	-
310	MSTRG.2256.1	Os01g0633000	-	Similar to 50S ribosomal protein L31	Genetic Information Processing	Translation	ko03010//Ribosome	K02909	GO:0005840//ribosome	GO:0003735//structural constituent of ribosome	GO:0006412//translation
310	MSTRG.2256.1	Os01g0633200	X1	Similar to X1 (Fragment)	-	-	-	-	-	-	GO:0031047//gene silencing by RNA
311	MSTRG.2258.1	Os01g0633500	Rd	Dihydroflavonol-4-reductase (DFR), Proanthocyanidin synthesi	Metabolism;Metabolism;Metabolism	Global and overview maps;Global and overview maps;Biosynthesis of other secondary metabolites	ko01100//Metabolic pathways;ko01110//Biosynthesis of secondary metabolites;ko00941//Flavonoid biosynthesis	K13082;K13082;K13082	-	GO:0003824//catalytic activity;GO:0050662//coenzyme binding	-
311	MSTRG.2258.1	Os01g0633800	-	Non-protein coding transcript	-	-	-	-	-	-	-
312	MSTRG.2259.1	Os01g0633500	Rd	Dihydroflavonol-4-reductase (DFR), Proanthocyanidin synthesi	Metabolism;Metabolism;Metabolism	Global and overview maps;Global and overview maps;Biosynthesis of other secondary metabolites	ko01100//Metabolic pathways;ko01110//Biosynthesis of secondary metabolites;ko00941//Flavonoid biosynthesis	K13082;K13082;K13082	-	GO:0003824//catalytic activity;GO:0050662//coenzyme binding	-
312	MSTRG.2259.1	Os01g0633800	-	Non-protein coding transcript	-	-	-	-	-	-	-
313	MSTRG.2260.1	Os01g0633800	-	Non-protein coding transcript	-	-	-	-	-	-	-
314	MSTRG.2262.1	Os01g0633800	-	Non-protein coding transcript	-	-	-	-	-	-	-
315	MSTRG.2267.1	Os01g0633800	-	Non-protein coding transcript	-	-	-	-	-	-	-
315	MSTRG.2267.1	Os01g0634300	OsDjC11	Conserved hypothetical protein	-	-	-	-	GO:0005737//cytoplasm;GO:0031982//vesicle;GO:0043231//intracellular membrane-bounded organelle	GO:0030276//clathrin binding	GO:0006898//receptor-mediated endocytosis;GO:0072318//clathrin coat disassembly;GO:0072583//clathrin-mediated endocytosis
316	MSTRG.2270.1	Os01g0635200	-	Homeodomain-like containing protein	-	-	-	-	GO:0005634//nucleus	GO:0003677//DNA binding	-
316	MSTRG.2270.1	Os01g0635600	OsZHD5	Trimeric LpxA-like domain containing protein	-	-	-	-	-	-	-
316	MSTRG.2270.1	Os01g0635550	OsZHD5	ZF-HD homeobox protein Cys/His-rich dimerisation region domain containing protein	-	-	-	-	GO:0005634//nucleus	GO:0003677//DNA binding;GO:0046872//metal ion binding	-
317	MSTRG.2271.1	Os01g0635600	OsZHD5	Trimeric LpxA-like domain containing protein	-	-	-	-	-	-	-
317	MSTRG.2271.1	Os01g0635800	-	Hypothetical gene	-	-	-	-	-	-	-
317	MSTRG.2271.1	Os01g0635550	OsZHD5	ZF-HD homeobox protein Cys/His-rich dimerisation region domain containing protein	-	-	-	-	GO:0005634//nucleus	GO:0003677//DNA binding;GO:0046872//metal ion binding	-
318	MSTRG.2275.1	Os01g0636400	-	Alpha/beta hydrolase family protein	-	-	-	-	-	GO:0003824//catalytic activity;GO:0016787//hydrolase activity	-
318	MSTRG.2275.1	Os01g0636500	OsPGL19	Similar to Polygalacturonase PG2	-	-	-	-	GO:0005576//extracellular region	GO:0004650//polygalacturonase activity;GO:0016787//hydrolase activity;GO:0016798//hydrolase activity, acting on glycosyl bonds	GO:0005975//carbohydrate metabolic process;GO:0008152//metabolic process;GO:0071555//cell wall organization
318	MSTRG.2275.1	Os01g0636600	-	Hypothetical conserved gene	-	-	-	-	GO:0005739//mitochondrion;GO:0009507//chloroplast;GO:0009536//plastid	GO:0016787//hydrolase activity;GO:0042586//peptide deformylase activity;GO:0046872//metal ion binding	GO:0006412//translation;GO:0018206//peptidyl-methionine modification;GO:0031365//N-terminal protein amino acid modification;GO:0043686//co-translational protein modification
319	MSTRG.2291.1	Os01g0640400	-	Hypothetical protein	-	-	-	-	-	-	-
319	MSTRG.2291.1	Os01g0640600	-	Similar to LIMONENE cyclase like protein	-	-	-	-	GO:0016021//integral component of membrane	GO:0016757//transferase activity, transferring glycosyl groups	GO:0006486//protein glycosylation
319	MSTRG.2291.1	Os01g0641000	-	Similar to Protein kinase	-	-	-	-	-	GO:0004672//protein kinase activity;GO:0004674//protein serine/threonine kinase activity;GO:0005524//ATP binding	GO:0006468//protein phosphorylation
319	MSTRG.2291.1	Os01g0641050	-	Non-protein coding transcript	-	-	-	-	-	-	-
319	MSTRG.2291.1	Os01g0640800	-	Similar to radical SAM domain-containing protein	-	-	-	-	GO:0005737//cytoplasm	GO:0003824//catalytic activity;GO:0008173//RNA methyltransferase activity;GO:0051536//iron-sulfur cluster binding	GO:0006364//rRNA processing;GO:0030488//tRNA methylation;GO:0070475//rRNA base methylation
320	MSTRG.2297.1	Os01g0641000	-	Similar to Protein kinase	-	-	-	-	-	GO:0004672//protein kinase activity;GO:0004674//protein serine/threonine kinase activity;GO:0005524//ATP binding	GO:0006468//protein phosphorylation
320	MSTRG.2297.1	Os01g0641050	-	Non-protein coding transcript	-	-	-	-	-	-	-
320	MSTRG.2297.1	Os01g0640800	-	Similar to radical SAM domain-containing protein	-	-	-	-	GO:0005737//cytoplasm	GO:0003824//catalytic activity;GO:0008173//RNA methyltransferase activity;GO:0051536//iron-sulfur cluster binding	GO:0006364//rRNA processing;GO:0030488//tRNA methylation;GO:0070475//rRNA base methylation
321	MSTRG.2304.1	Os01g0642600	-	Protein of unknown function DUF617, plant family protein	-	-	-	-	-	-	GO:0010274//hydrotropism
322	MSTRG.2307.1	Os01g0642900	SSB	Nucleic acid-binding, OB-fold domain containing protein	Genetic Information Processing;Genetic Information Processing;Genetic Information Processing	Replication and repair;Replication and repair;Replication and repair	ko03440//Homologous recombination;ko03030//DNA replication;ko03430//Mismatch repair	K03111;K03111;K03111	GO:0005739//mitochondrion;GO:0009295//nucleoid;GO:0042645//mitochondrial nucleoid	GO:0003677//DNA binding;GO:0003697//single-stranded DNA binding	GO:0006260//DNA replication;GO:0006264//mitochondrial DNA replication;GO:0051096//positive regulation of helicase activity
322	MSTRG.2307.1	Os01g0642700	-	S-locus glycoprotein domain containing protein	-	-	-	-	-	-	GO:0048544//recognition of pollen
323	MSTRG.2308.1	Os01g0643800	-	Similar to Mitogen-activated protein kinase	Environmental Information Processing	Signal transduction	ko04016//MAPK signaling pathway - plant	K20538	GO:0005634//nucleus;GO:0005737//cytoplasm	GO:0000166//nucleotide binding;GO:0004672//protein kinase activity;GO:0004674//protein serine/threonine kinase activity;GO:0004707//MAP kinase activity;GO:0005524//ATP binding;GO:0016301//kinase activity;GO:0016740//transferase activity	GO:0000165//MAPK cascade;GO:0006468//protein phosphorylation;GO:0010468//regulation of gene expression;GO:0016310//phosphorylation;GO:0035556//intracellular signal transduction
323	MSTRG.2308.1	Os01g0643825	-	Hypothetical protein	-	-	-	-	-	-	-
324	MSTRG.2316.1	Os01g0645900	OsSultr5	Similar to sulfate transporter	-	-	-	-	GO:0005773//vacuole;GO:0009705//plant-type vacuole membrane;GO:0016020//membrane;GO:0016021//integral component of membrane	GO:0015098//molybdate ion transmembrane transporter activity	GO:0015689//molybdate ion transport;GO:0090414//molybdate ion export from vacuole
325	MSTRG.2340.1	Os01g0650700	-	Transposase, Ptta/En/Spm, plant domain containing protein	-	-	-	-	-	-	-
326	MSTRG.2379.1	Os01g0658300	-	Conserved hypothetical protein	-	-	-	-	-	-	-
326	MSTRG.2379.1	Os01g0658400	UBC5A	Ubiquitin-conjugating enzyme E	Genetic Information Processing;Genetic Information Processing	Folding, sorting and degradation;Folding, sorting and degradation	ko04141//Protein processing in endoplasmic reticulum;ko04120//Ubiquitin mediated proteolysis	K06689;K06689	-	GO:0000166//nucleotide binding;GO:0004842//ubiquitin-protein transferase activity;GO:0005524//ATP binding;GO:0016740//transferase activity;GO:0061631//ubiquitin conjugating enzyme activity	GO:0006511//ubiquitin-dependent protein catabolic process;GO:0016567//protein ubiquitination
326	MSTRG.2379.1	Os01g0658450	-	Non-protein coding transcript	-	-	-	-	-	-	-
327	MSTRG.2397.1	Os01g0661400	-	S1, RNA binding domain containing protein	Genetic Information Processing	Folding, sorting and degradation	ko03018//RNA degradation	K03681	GO:0000176//nuclear exosome (RNase complex);GO:0000177//cytoplasmic exosome (RNase complex);GO:0000178//exosome (RNase complex)	GO:0003723//RNA binding	GO:0000467//exonucleolytic trimming to generate mature 3'-end of 5.8S rRNA from tricistronic rRNA transcript (SSU-rRNA, 5.8S rRNA, LSU-rRNA);GO:0034427//nuclear-transcribed mRNA catabolic process, exonucleolytic, 3'-5';GO:0034475//U4 snRNA 3'-end processing;GO:0043928//exonucleolytic nuclear-transcribed mRNA catabolic process involved in deadenylation-dependent decay;GO:0071034//CUT catabolic pro…
327	MSTRG.2397.1	Os01g0661500	-	Mov34/MPN/PAD-1 family protein	Cellular Processes	Transport and catabolism	ko04144//Endocytosis	K11866	GO:0005768//endosome;GO:0016020//membrane	GO:0004843//thiol-dependent ubiquitin-specific protease activity;GO:0005515//protein binding	GO:0016579//protein deubiquitination;GO:0070536//protein K63-linked deubiquitination
328	MSTRG.2405.1	Os01g0661750	-	Hypothetical conserved gene	-	-	-	-	-	-	-
328	MSTRG.2405.1	Os01g0662300	rpl12-2	Similar to Isoform 2 of 50S ribosomal protein L12, chloroplastic	Genetic Information Processing	Translation	ko03010//Ribosome	K02935	-	GO:0003735//structural constituent of ribosome	GO:0006412//translation
329	MSTRG.2413.1	Os01g0663400	OsAP10	Similar to Aspartic proteinase oryzasin 1 precursor (EC 3.4.23.-)	-	-	-	-	-	GO:0004190//aspartic-type endopeptidase activity;GO:0008233//peptidase activity;GO:0016787//hydrolase activity	GO:0006508//proteolysis;GO:0006629//lipid metabolic process;GO:0030163//protein catabolic process
329	MSTRG.2413.1	Os01g0663800	-	Protein of unknown function DUF1296 family protein	-	-	-	-	-	GO:0005515//protein binding	-
330	MSTRG.2414.1	Os01g0663400	OsAP10	Similar to Aspartic proteinase oryzasin 1 precursor (EC 3.4.23.-)	-	-	-	-	-	GO:0004190//aspartic-type endopeptidase activity;GO:0008233//peptidase activity;GO:0016787//hydrolase activity	GO:0006508//proteolysis;GO:0006629//lipid metabolic process;GO:0030163//protein catabolic process
330	MSTRG.2414.1	Os01g0663800	-	Protein of unknown function DUF1296 family protein	-	-	-	-	-	GO:0005515//protein binding	-
331	MSTRG.2416.1	Os01g0664000	OsCttP1	Similar to carboxyl-terminal-processing protease	-	-	-	-	GO:0031977//thylakoid lumen	GO:0004175//endopeptidase activity;GO:0005515//protein binding;GO:0008236//serine-type peptidase activity	GO:0006508//proteolysis
331	MSTRG.2416.1	Os01g0663500	-	Transcriptional coactivator/pterin dehydratase family protein	Metabolism;Metabolism	Global and overview maps;Metabolism of cofactors and vitamins	ko01100//Metabolic pathways;ko00790//Folate biosynthesis	K01724;K01724	GO:0005739//mitochondrion	GO:0008124//4-alpha-hydroxytetrahydrobiopterin dehydratase activity	GO:0006729//tetrahydrobiopterin biosynthetic process
332	MSTRG.2433.1	Os01g0666101	-	Similar to predicted protein	-	-	-	-	-	-	-
332	MSTRG.2433.1	Os01g0666200	-	High mobility group, HMG1/HMG2 domain containing protein	-	-	-	-	GO:0005634//nucleus	GO:0003677//DNA binding	-
332	MSTRG.2433.1	Os01g0666500	-	Similar to cytochrome B561-related	-	-	-	-	-	-	-
332	MSTRG.2433.1	Os01g0666600	-	Conserved hypothetical protein	-	-	-	-	GO:0009507//chloroplast;GO:0016021//integral component of membrane	-	-
333	MSTRG.2445.1	Os01g0667600	OsRab11C1	Similar to GTP-binding protein	-	-	-	-	GO:0005768//endosome;GO:0012505//endomembrane system	GO:0003924//GTPase activity;GO:0005525//GTP binding	GO:0006886//intracellular protein transport;GO:0032482//Rab protein signal transduction
333	MSTRG.2445.1	Os01g0667550	-	Hypothetical gene	-	-	-	-	-	-	-
333	MSTRG.2445.1	Os01g0667725	-	Non-protein coding transcript	-	-	-	-	-	-	-
333	MSTRG.2445.1	Os01g0667750	-	Hypothetical gene	-	-	-	-	-	-	-
333	MSTRG.2445.1	Os01g0667800	-	Similar to U2 snRNP auxiliary factor, small subunit	Genetic Information Processing	Transcription	ko03040//Spliceosome	K12836	GO:0005681//spliceosomal complex;GO:0089701//U2AF	GO:0003676//nucleic acid binding;GO:0003723//RNA binding;GO:0030628//pre-mRNA 3'-splice site binding;GO:0046872//metal ion binding	GO:0000398//mRNA splicing, via spliceosome
334	MSTRG.2456.1	Os01g0669100	OsLSK1	S-domain receptor-like kinase, OsPR1b-interacting factor, Resistance protein, Grain yield, Disease resistanc	-	-	-	-	GO:0005886//plasma membrane;GO:0016020//membrane;GO:0016021//integral component of membrane	GO:0000166//nucleotide binding;GO:0004672//protein kinase activity;GO:0004674//protein serine/threonine kinase activity;GO:0005524//ATP binding;GO:0016301//kinase activity;GO:0016740//transferase activity	GO:0006468//protein phosphorylation;GO:0016310//phosphorylation;GO:0048544//recognition of pollen
334	MSTRG.2456.1	MSTRG.2453	--	stress response protein nst1-like [Oryza sativa Japonica Group]	-	-	-	-	-	-	-
335	MSTRG.2459.1	MSTRG.2460	--	OSJNBa0042N22.10 [Oryza sativa Japonica Group]	-	-	-	-	GO:0043231//intracellular membrane-bounded organelle	-	GO:0010466//negative regulation of peptidase activity
336	MSTRG.2464.1	Os01g0670600	-	Protein kinase, catalytic domain domain containing protein	-	-	-	-	GO:0005886//plasma membrane;GO:0016020//membrane;GO:0016021//integral component of membrane	GO:0000166//nucleotide binding;GO:0004672//protein kinase activity;GO:0004674//protein serine/threonine kinase activity;GO:0005524//ATP binding;GO:0016301//kinase activity;GO:0016740//transferase activity	GO:0006468//protein phosphorylation;GO:0016310//phosphorylation;GO:0048544//recognition of pollen
336	MSTRG.2464.1	Os01g0670100	-	Serine/threonine protein kinase-related domain containing protein	-	-	-	-	GO:0005886//plasma membrane;GO:0016021//integral component of membrane	GO:0000166//nucleotide binding;GO:0004672//protein kinase activity;GO:0004674//protein serine/threonine kinase activity;GO:0005524//ATP binding;GO:0016301//kinase activity;GO:0016740//transferase activity	GO:0006468//protein phosphorylation;GO:0016310//phosphorylation;GO:0048544//recognition of pollen
336	MSTRG.2464.1	Os01g0670500	-	Conserved hypothetical protein	-	-	-	-	-	-	-
337	MSTRG.2476.1	Os01g0673400	-	Conserved hypothetical protein	-	-	-	-	-	GO:0033612//receptor serine/threonine kinase binding	GO:0045168//cell-cell signaling involved in cell fate commitment
337	MSTRG.2476.1	Os01g0673500	-	Similar to predicted protein	-	-	-	-	GO:0005634//nucleus	GO:0000166//nucleotide binding;GO:0005524//ATP binding;GO:0008568//microtubule-severing ATPase activity;GO:0016887//ATPase activity	GO:0031122//cytoplasmic microtubule organization;GO:0051013//microtubule severing
337	MSTRG.2476.1	Os01g0673700	OsDof5	Similar to Dof3 (Fragment)	-	-	-	-	GO:0005634//nucleus	GO:0003677//DNA binding;GO:0003700//transcription factor activity, sequence-specific DNA binding;GO:0043565//sequence-specific DNA binding	GO:0006355//regulation of transcription, DNA-templated
337	MSTRG.2476.1	Os01g0673800	Os	Similar to ATP synthase protein I -related	-	-	-	-	GO:0009534//chloroplast thylakoid;GO:0009535//chloroplast thylakoid membrane	-	GO:0033614//chloroplast proton-transporting ATP synthase complex assembly
338	MSTRG.2480.1	Os01g0673600	OsUBC13	Ubiquitin-conjugating enzyme, Error-free DNA damage tolerance, Regulation of abiotic stress and hormone response	Genetic Information Processing	Folding, sorting and degradation	ko04120//Ubiquitin mediated proteolysis	K10580	GO:0005634//nucleus	GO:0000166//nucleotide binding;GO:0005524//ATP binding;GO:0016740//transferase activity;GO:0061631//ubiquitin conjugating enzyme activity	GO:0006301//postreplication repair;GO:0070534//protein K63-linked ubiquitination
338	MSTRG.2480.1	Os01g0673650	-	Non-protein coding transcript	-	-	-	-	-	-	-
338	MSTRG.2480.1	Os01g0673900	-	Zinc finger, RING-type domain containing protein	-	-	-	-	GO:0005774//vacuolar membrane	GO:0008270//zinc ion binding	-
339	MSTRG.2486.1	Os01g0674100	-	Similar to ATP binding protein	-	-	-	-	-	GO:0000166//nucleotide binding;GO:0004672//protein kinase activity;GO:0004674//protein serine/threonine kinase activity;GO:0005524//ATP binding	GO:0006468//protein phosphorylation
339	MSTRG.2486.1	Os01g0674150	-	Conserved hypothetical protein	-	-	-	-	-	-	-
339	MSTRG.2486.1	MSTRG.2487	--	Os02g0145500, partial [Oryza sativa Japonica Group]	-	-	-	-	-	-	-
339	MSTRG.2486.1	Os01g0674400	-	Hypothetical conserved gene	-	-	-	-	-	-	-
339	MSTRG.2486.1	Os01g0674450	-	Non-protein coding transcript	-	-	-	-	-	-	-
339	MSTRG.2486.1	Os01g0674500	OsTLP9	Similar to cDNA clone:J023048A08, full insert sequence	-	-	-	-	GO:0005929//cilium	GO:0035091//phosphatidylinositol binding	GO:0061512//protein localization to cilium
340	MSTRG.2488.3	Os01g0674150	-	Conserved hypothetical protein	-	-	-	-	-	-	-
340	MSTRG.2488.3	MSTRG.2487	--	Os02g0145500, partial [Oryza sativa Japonica Group]	-	-	-	-	-	-	-
340	MSTRG.2488.3	Os01g0674500	OsTLP9	Similar to cDNA clone:J023048A08, full insert sequence	-	-	-	-	GO:0005929//cilium	GO:0035091//phosphatidylinositol binding	GO:0061512//protein localization to cilium
341	MSTRG.2491.1	MSTRG.2487	--	Os02g0145500, partial [Oryza sativa Japonica Group]	-	-	-	-	-	-	-
341	MSTRG.2491.1	Os01g0674400	-	Hypothetical conserved gene	-	-	-	-	-	-	-
341	MSTRG.2491.1	Os01g0674450	-	Non-protein coding transcript	-	-	-	-	-	-	-
341	MSTRG.2491.1	Os01g0674700	-	Similar to EMB2279 (EMBRYO DEFECTIVE 2279)	-	-	-	-	GO:0009507//chloroplast	GO:0005515//protein binding	GO:0009658//chloroplast organization;GO:0009793//embryo development ending in seed dormancy;GO:0010239//chloroplast mRNA processing
342	MSTRG.2495.1	Os01g0675100	OsPrxII	Similar to peroxiredoxin	-	-	-	-	GO:0005623//cell;GO:0005737//cytoplasm	GO:0004601//peroxidase activity;GO:0008379//thioredoxin peroxidase activity;GO:0016209//antioxidant activity;GO:0016491//oxidoreductase activity;GO:0051920//peroxiredoxin activity	GO:0034599//cellular response to oxidative stress;GO:0042744//hydrogen peroxide catabolic process;GO:0045454//cell redox homeostasis;GO:0055114//oxidation-reduction process;GO:0098869//cellular oxidant detoxification
342	MSTRG.2495.1	Os01g0675400	-	DNA-binding pseudobarrel domain domain containing protein	-	-	-	-	-	-	-
342	MSTRG.2495.1	Os01g0674800	-	Serine/threonine-specific protein kinase NPK15-like	-	-	-	-	GO:0016021//integral component of membrane	GO:0004672//protein kinase activity;GO:0005524//ATP binding	GO:0006468//protein phosphorylation
343	MSTRG.2499.1	Os01g0675800	ONAC014	No apical meristem (NAM) protein domain containing protein	-	-	-	-	GO:0005634//nucleus	GO:0003677//DNA binding	GO:0006355//regulation of transcription, DNA-templated
343	MSTRG.2499.1	Os01g0675933	-	Conserved hypothetical protein	-	-	-	-	-	-	-
344	MSTRG.2501.1	Os01g0675700	OsIAA5	Similar to Auxin-responsive protein IAA14 (Indoleacetic acid-induced protein 14) (SOLITARY-ROOT protein)	Environmental Information Processing	Signal transduction	ko04075//Plant hormone signal transduction	K14484	GO:0005634//nucleus	GO:0005515//protein binding	GO:0006355//regulation of transcription, DNA-templated;GO:0009734//auxin-activated signaling pathway
344	MSTRG.2501.1	Os01g0675933	-	Conserved hypothetical protein	-	-	-	-	-	-	-
345	MSTRG.2518.1	Os01g0679500	-	Peptidase aspartic, catalytic domain containing protein	-	-	-	-	GO:0005576//extracellular region	GO:0004190//aspartic-type endopeptidase activity	GO:0006508//proteolysis;GO:0030163//protein catabolic process
345	MSTRG.2518.1	Os01g0679550	-	Similar to Aspartic proteinase nepenthesin-2	-	-	-	-	GO:0005576//extracellular region	GO:0004190//aspartic-type endopeptidase activity	GO:0006508//proteolysis;GO:0030163//protein catabolic process
345	MSTRG.2518.1	Os01g0679600	-	Similar to THAP domain-containing protein 4	-	-	-	-	-	-	-
346	MSTRG.2526.1	Os01g0680400	-	Histone-fold domain containing protein	Genetic Information Processing	Transcription	ko03022//Basal transcription factors	K03135	GO:0005634//nucleus;GO:0005669//transcription factor TFIID complex	GO:0003713//transcription coactivator activity;GO:0003743//translation initiation factor activity;GO:0008134//transcription factor binding;GO:0046982//protein heterodimerization activity	GO:0006367//transcription initiation from RNA polymerase II promoter;GO:0051123//RNA polymerase II transcriptional preinitiation complex assembly;GO:1903508//positive regulation of nucleic acid-templated transcription
346	MSTRG.2526.1	Os01g0680500	-	Hypothetical protein	-	-	-	-	-	-	-
346	MSTRG.2526.1	Os01g0680600	-	Conserved hypothetical protein	-	-	-	-	-	-	-
346	MSTRG.2526.1	Os01g0680650	-	Hypothetical conserved gene	-	-	-	-	-	-	-
347	MSTRG.2531.1	Os01g0681100	OsDRP1B	Similar to Dynamin-related protein 1B (Dynamin-like protein B)	-	-	-	-	GO:0005737//cytoplasm;GO:0016020//membrane	GO:0000166//nucleotide binding;GO:0003924//GTPase activity;GO:0005525//GTP binding;GO:0008017//microtubule binding	GO:0000266//mitochondrial fission
347	MSTRG.2531.1	Os01g0681150	-	Hypothetical protein	-	-	-	-	-	-	-
348	MSTRG.2551.1	Os01g0684800	-	Protein prenyltransferase, alpha subunit domain containing protein	-	-	-	-	GO:0005737//cytoplasm	GO:0008318//protein prenyltransferase activity	GO:0018342//protein prenylation
348	MSTRG.2551.1	Os01g0684900	-	Multi antimicrobial extrusion protein MatE family protein	-	-	-	-	GO:0016020//membrane;GO:0016021//integral component of membrane	GO:0015238//drug transmembrane transporter activity;GO:0015297//antiporter activity;GO:0022857//transmembrane transporter activity;GO:0042910//xenobiotic transporter activity	GO:0006855//drug transmembrane transport;GO:0042908//xenobiotic transport;GO:0055085//transmembrane transport
348	MSTRG.2551.1	Os01g0685100	-	Conserved hypothetical protein	-	-	-	-	-	-	-
348	MSTRG.2551.1	Os01g0685300	-	Conserved hypothetical protein	-	-	-	-	-	-	-
348	MSTRG.2551.1	Os01g0685200	-	Similar to anti-silencing protein 1	-	-	-	-	GO:0005634//nucleus	-	GO:0006333//chromatin assembly or disassembly
349	MSTRG.2559.2	Os01g0685900	-	Similar to 65kD microtubule associated protein	-	-	-	-	-	GO:0008017//microtubule binding	GO:0000226//microtubule cytoskeleton organization
349	MSTRG.2559.2	Os01g0686000	-	Similar to cDNA, clone: J100026I16, full insert sequence	-	-	-	-	-	-	-
349	MSTRG.2559.2	Os01g0686200	-	UDP-glucuronosyl/UDP-glucosyltransferase family protein	-	-	-	-	GO:0043231//intracellular membrane-bounded organelle	GO:0008194//UDP-glycosyltransferase activity;GO:0016740//transferase activity;GO:0016757//transferase activity, transferring glycosyl groups;GO:0016758//transferase activity, transferring hexosyl groups;GO:0080043//quercetin 3-O-glucosyltransferase activity;GO:0080044//quercetin 7-O-glucosyltransferase activity	-
349	MSTRG.2559.2	Os01g0686300	-	UDP-glucuronosyl/UDP-glucosyltransferase family protein	-	-	-	-	GO:0043231//intracellular membrane-bounded organelle	GO:0008194//UDP-glycosyltransferase activity;GO:0016740//transferase activity;GO:0016757//transferase activity, transferring glycosyl groups;GO:0016758//transferase activity, transferring hexosyl groups;GO:0080043//quercetin 3-O-glucosyltransferase activity;GO:0080044//quercetin 7-O-glucosyltransferase activity	-
350	MSTRG.2559.3	Os01g0685900	-	Similar to 65kD microtubule associated protein	-	-	-	-	-	GO:0008017//microtubule binding	GO:0000226//microtubule cytoskeleton organization
350	MSTRG.2559.3	Os01g0686000	-	Similar to cDNA, clone: J100026I16, full insert sequence	-	-	-	-	-	-	-
350	MSTRG.2559.3	Os01g0686200	-	UDP-glucuronosyl/UDP-glucosyltransferase family protein	-	-	-	-	GO:0043231//intracellular membrane-bounded organelle	GO:0008194//UDP-glycosyltransferase activity;GO:0016740//transferase activity;GO:0016757//transferase activity, transferring glycosyl groups;GO:0016758//transferase activity, transferring hexosyl groups;GO:0080043//quercetin 3-O-glucosyltransferase activity;GO:0080044//quercetin 7-O-glucosyltransferase activity	-
350	MSTRG.2559.3	Os01g0686300	-	UDP-glucuronosyl/UDP-glucosyltransferase family protein	-	-	-	-	GO:0043231//intracellular membrane-bounded organelle	GO:0008194//UDP-glycosyltransferase activity;GO:0016740//transferase activity;GO:0016757//transferase activity, transferring glycosyl groups;GO:0016758//transferase activity, transferring hexosyl groups;GO:0080043//quercetin 3-O-glucosyltransferase activity;GO:0080044//quercetin 7-O-glucosyltransferase activity	-
351	MSTRG.2560.1	Os01g0686200	-	UDP-glucuronosyl/UDP-glucosyltransferase family protein	-	-	-	-	GO:0043231//intracellular membrane-bounded organelle	GO:0008194//UDP-glycosyltransferase activity;GO:0016740//transferase activity;GO:0016757//transferase activity, transferring glycosyl groups;GO:0016758//transferase activity, transferring hexosyl groups;GO:0080043//quercetin 3-O-glucosyltransferase activity;GO:0080044//quercetin 7-O-glucosyltransferase activity	-
351	MSTRG.2560.1	Os01g0686300	-	UDP-glucuronosyl/UDP-glucosyltransferase family protein	-	-	-	-	GO:0043231//intracellular membrane-bounded organelle	GO:0008194//UDP-glycosyltransferase activity;GO:0016740//transferase activity;GO:0016757//transferase activity, transferring glycosyl groups;GO:0016758//transferase activity, transferring hexosyl groups;GO:0080043//quercetin 3-O-glucosyltransferase activity;GO:0080044//quercetin 7-O-glucosyltransferase activity	-
351	MSTRG.2560.1	Os01g0686100	-	Hypothetical conserved gene	-	-	-	-	-	-	-
352	MSTRG.2571.3	Os01g0687450	-	Hypothetical gene	-	-	-	-	-	-	-
352	MSTRG.2571.3	Os01g0687600	-	Similar to Arginine/serine-rich coiled coil protein 1	-	-	-	-	GO:0005634//nucleus;GO:0005737//cytoplasm	-	GO:0000380//alternative mRNA splicing, via spliceosome;GO:0000398//mRNA splicing, via spliceosome
352	MSTRG.2571.3	Os01g0687700	-	Protein of unknown function DUF292, eukaryotic domain containing protein	Cellular Processes	Transport and catabolism	ko04144//Endocytosis	K19476	-	-	GO:0008104//protein localization;GO:0015031//protein transport
352	MSTRG.2571.3	Os01g0687800	-	FAD linked oxidase, N-terminal domain containing protein	Metabolism;Metabolism	Global and overview maps;Carbohydrate metabolism	ko01100//Metabolic pathways;ko00053//Ascorbate and aldarate metabolism	K00103;K00103	GO:0016020//membrane	GO:0003885//D-arabinono-1,4-lactone oxidase activity;GO:0016491//oxidoreductase activity;GO:0050105//L-gulonolactone oxidase activity;GO:0050660//flavin adenine dinucleotide binding;GO:0071949//FAD binding	GO:0019853//L-ascorbic acid biosynthetic process;GO:0055114//oxidation-reduction process
353	MSTRG.2582.1	Os01g0689800	OsPOP3	Alpha/beta hydrolase fold-1 domain containing protein	-	-	-	-	-	GO:0008233//peptidase activity	-
354	MSTRG.2584.1	Os01g0689600	-	Hypothetical conserved gene	-	-	-	-	-	-	-
354	MSTRG.2584.1	Os01g0689975	OsPOP3	Hypothetical protein	-	-	-	-	-	-	-
354	MSTRG.2584.1	Os01g0689900	OsWAK10	Hypothetical conserved gene	-	-	-	-	GO:0005886//plasma membrane;GO:0016020//membrane;GO:0016021//integral component of membrane	GO:0000166//nucleotide binding;GO:0004672//protein kinase activity;GO:0004674//protein serine/threonine kinase activity;GO:0005524//ATP binding;GO:0016301//kinase activity;GO:0030247//polysaccharide binding	GO:0006468//protein phosphorylation;GO:0007166//cell surface receptor signaling pathway;GO:0016310//phosphorylation
355	MSTRG.2591.1	Os01g0690900	-	Conserved hypothetical protein	-	-	-	-	-	GO:0030247//polysaccharide binding	-
355	MSTRG.2591.1	Os01g0691000	-	Similar to Acidic endochitinase SE2 precursor (EC 3.2.1.14)	Metabolism;Metabolism	Global and overview maps;Carbohydrate metabolism	ko01100//Metabolic pathways;ko00520//Amino sugar and nucleotide sugar metabolism	K01183;K01183	GO:0005576//extracellular region	GO:0004553//hydrolase activity, hydrolyzing O-glycosyl compounds;GO:0004568//chitinase activity;GO:0016787//hydrolase activity;GO:0016798//hydrolase activity, acting on glycosyl bonds	GO:0005975//carbohydrate metabolic process;GO:0008152//metabolic process
355	MSTRG.2591.1	Os01g0691050	-	Protein kinase, catalytic domain domain containing protein	-	-	-	-	-	GO:0004672//protein kinase activity;GO:0005524//ATP binding	GO:0006468//protein phosphorylation
355	MSTRG.2591.1	Os01g0691100	OsLTP2.1	Plant lipid transfer protein/seed storage/trypsin-alpha amylase inhibitor domain containing protein	-	-	-	-	-	-	GO:0006869//lipid transport
355	MSTRG.2591.1	Os01g0691200	-	Hypothetical protein	-	-	-	-	GO:0016021//integral component of membrane	-	-
356	MSTRG.2649.1	Os01g0698100	-	SWAP/Surp domain containing protein	-	-	-	-	-	GO:0003723//RNA binding	GO:0000395//mRNA 5'-splice site recognition;GO:0006396//RNA processing
356	MSTRG.2649.1	Os01g0698150	-	Non-protein coding transcript	-	-	-	-	-	-	-
356	MSTRG.2649.1	Os01g0698200	OsSTRL1	Similar to strictosidine synthase 1	-	-	-	-	GO:0005783//endoplasmic reticulum;GO:0016020//membrane	GO:0016844//strictosidine synthase activity	GO:0009058//biosynthetic process
356	MSTRG.2649.1	Os01g0698500	-	Non-protein coding transcript	-	-	-	-	-	-	-
357	MSTRG.2657.1	Os01g0700400	-	Hypothetical protein	-	-	-	-	-	-	-
357	MSTRG.2657.1	Os01g0700500	-	Similar to Flavonoid 3-monooxygenase	-	-	-	-	GO:0016020//membrane	GO:0004497//monooxygenase activity;GO:0005506//iron ion binding;GO:0016491//oxidoreductase activity;GO:0016705//oxidoreductase activity, acting on paired donors, with incorporation or reduction of molecular oxygen;GO:0016709//oxidoreductase activity, acting on paired donors, with incorporation or reduction of molecular oxygen, NAD(P)H as one donor, and incorporation of one atom of oxygen;GO:00200…	GO:0055114//oxidation-reduction process
358	MSTRG.2661.1	Os01g0702000	OsBBD1	Protein of unknown function DUF151 domain containing protein	-	-	-	-	GO:0005634//nucleus;GO:0030891//VCB complex	GO:0004518//nuclease activity;GO:0016787//hydrolase activity	GO:0016567//protein ubiquitination;GO:0090305//nucleic acid phosphodiester bond hydrolysis
358	MSTRG.2661.1	MSTRG.2662	--	OSJNBa0006M15.2 [Oryza sativa Japonica Group]	-	-	-	-	GO:0043231//intracellular membrane-bounded organelle	-	GO:0010466//negative regulation of peptidase activity
358	MSTRG.2661.1	MSTRG.2663	--	OSJNBa0070M12.17 [Oryza sativa Japonica Group]	-	-	-	-	GO:0043231//intracellular membrane-bounded organelle	-	GO:0010466//negative regulation of peptidase activity
359	MSTRG.2672.1	Os01g0703600	SPL28	Clathrin-associated adaptor protein complex 1 medium subunit mu1 (AP1M1), Regulation of vesicular trafficking, Disease resistanc	-	-	-	-	GO:0016020//membrane;GO:0030131//clathrin adaptor complex	-	GO:0006886//intracellular protein transport;GO:0015031//protein transport;GO:0016192//vesicle-mediated transport
359	MSTRG.2672.1	Os01g0703800	-	Hypothetical protein	-	-	-	-	-	-	-
359	MSTRG.2672.1	Os01g0704000	-	Pectinesterase inhibitor domain containing protein	-	-	-	-	-	GO:0004857//enzyme inhibitor activity;GO:0030599//pectinesterase activity;GO:0046910//pectinesterase inhibitor activity	GO:0043086//negative regulation of catalytic activity
360	MSTRG.2674.1	Os01g0704100	NRT2.3	Nitrate transporter, Nitrate transpor	Metabolism	Energy metabolism	ko00910//Nitrogen metabolism	K02575	GO:0005886//plasma membrane;GO:0009705//plant-type vacuole membrane;GO:0016020//membrane;GO:0016021//integral component of membrane	GO:0005515//protein binding;GO:0015112//nitrate transmembrane transporter activity	GO:0015706//nitrate transport;GO:0042128//nitrate assimilation;GO:0055085//transmembrane transport;GO:0071249//cellular response to nitrate
360	MSTRG.2674.1	Os01g0704200	-	Similar to predicted protein	-	-	-	-	GO:0009507//chloroplast;GO:0016021//integral component of membrane	-	-
360	MSTRG.2674.1	Os01g0704300	Os_F0670	Conserved hypothetical protein	-	-	-	-	-	GO:0005515//protein binding	-
360	MSTRG.2674.1	Os01g0704400	-	Conserved hypothetical protein	-	-	-	-	-	-	-
361	MSTRG.2682.1	Os01g0705100	OsGLP1-3	Similar to Germin-like protein	-	-	-	-	GO:0005576//extracellular region;GO:0005618//cell wall;GO:0048046//apoplast	GO:0030145//manganese ion binding;GO:0045735//nutrient reservoir activity;GO:0046872//metal ion binding	-
361	MSTRG.2682.1	Os01g0705200	OsLEA14	Late embryogenesis abundant protein repeat containing protein	-	-	-	-	GO:0005634//nucleus	-	-
361	MSTRG.2682.1	Os01g0705400	-	Hypothetical conserved gene	-	-	-	-	-	-	-
361	MSTRG.2682.1	Os01g0705500	-	Similar to fiber protein Fb11	-	-	-	-	GO:0016021//integral component of membrane	-	-
362	MSTRG.2685.1	Os01g0705400	-	Hypothetical conserved gene	-	-	-	-	-	-	-
362	MSTRG.2685.1	Os01g0705300	-	Similar to PDE225/PTAC7	-	-	-	-	GO:0000427//plastid-encoded plastid RNA polymerase complex	-	GO:0042793//transcription from plastid promoter
363	MSTRG.2689.1	Os01g0705800	-	Conserved hypothetical protein	-	-	-	-	-	-	-
363	MSTRG.2689.1	Os01g0706000	-	Similar to RNA polymerase II transcriptional coactivator KELP	-	-	-	-	GO:0005634//nucleus;GO:0005667//transcription factor complex	GO:0003677//DNA binding;GO:0003713//transcription coactivator activity	GO:0006355//regulation of transcription, DNA-templated;GO:0060261//positive regulation of transcription initiation from RNA polymerase II promoter
363	MSTRG.2689.1	Os01g0706100	-	Conserved hypothetical protein	-	-	-	-	-	GO:0016829//lyase activity	-
363	MSTRG.2689.1	Os01g0706200	-	Cullin, N-terminal domain containing protein	-	-	-	-	-	GO:0031625//ubiquitin protein ligase binding	GO:0006511//ubiquitin-dependent protein catabolic process
364	MSTRG.2697.1	Os01g0706700	-	Protein of unknown function DUF590 family protein	-	-	-	-	GO:0016020//membrane;GO:0016021//integral component of membrane;GO:0034707//chloride channel complex	GO:0005254//chloride channel activity	GO:0006811//ion transport;GO:0006821//chloride transport;GO:1902476//chloride transmembrane transport
364	MSTRG.2697.1	Os01g0706800	-	Similar to agglutinin	-	-	-	-	-	-	-
364	MSTRG.2697.1	Os01g0706850	-	Non-protein coding transcript	-	-	-	-	-	-	-
365	MSTRG.2707.1	Os01g0708400	-	Non-protein coding transcript	-	-	-	-	-	-	-
365	MSTRG.2707.1	Os01g0708500	LOGL1	Similar to lysine decarboxylase-like protein	-	-	-	-	GO:0005634//nucleus;GO:0005829//cytosol	GO:0016787//hydrolase activity;GO:0016799//hydrolase activity, hydrolyzing N-glycosyl compounds	GO:0009691//cytokinin biosynthetic process
365	MSTRG.2707.1	Os01g0708700	-	IQ calmodulin-binding region domain containing protein	-	-	-	-	-	GO:0005515//protein binding	-
366	MSTRG.2710.1	Os01g0709000	-	Similar to Transcription factor MYB1	-	-	-	-	GO:0005634//nucleus	GO:0003677//DNA binding;GO:0003700//transcription factor activity, sequence-specific DNA binding;GO:0043565//sequence-specific DNA binding;GO:0044212//transcription regulatory region DNA binding	GO:0006355//regulation of transcription, DNA-templated;GO:0030154//cell differentiation
366	MSTRG.2710.1	Os01g0709100	-	Hypothetical protein	-	-	-	-	-	-	-
366	MSTRG.2710.1	Os01g0709750	-	Hypothetical gene	-	-	-	-	-	-	-
366	MSTRG.2710.1	Os01g0709500	-	Conserved hypothetical protein	-	-	-	-	GO:0005886//plasma membrane;GO:0016020//membrane;GO:0016021//integral component of membrane	GO:0000166//nucleotide binding;GO:0004672//protein kinase activity;GO:0004674//protein serine/threonine kinase activity;GO:0004675//transmembrane receptor protein serine/threonine kinase activity;GO:0005524//ATP binding	GO:0006468//protein phosphorylation;GO:0007178//transmembrane receptor protein serine/threonine kinase signaling pathway
367	MSTRG.2717.1	Os01g0710200	PAO1	Polyamine oxidase, Polyamine catabolis	Metabolism;Metabolism;Metabolism	Global and overview maps;Amino acid metabolism;Metabolism of other amino acids	ko01100//Metabolic pathways;ko00330//Arginine and proline metabolism;ko00410//beta-Alanine metabolism	K12259;K12259;K12259	GO:0005737//cytoplasm	GO:0016491//oxidoreductase activity;GO:0046592//polyamine oxidase activity;GO:0050660//flavin adenine dinucleotide binding;GO:0052894//norspermine:oxygen oxidoreductase activity;GO:0052901//spermine:oxygen oxidoreductase (spermidine-forming) activity;GO:0052903//N1-acetylspermine:oxygen oxidoreductase (3-acetamidopropanal-forming) activity;GO:1990534//thermospermine oxidase activity	GO:0046208//spermine catabolic process;GO:0048510//regulation of timing of transition from vegetative to reproductive phase;GO:0055114//oxidation-reduction process;GO:1903602//thermospermine catabolic process
367	MSTRG.2717.1	Os01g0710300	-	Conserved hypothetical protein	-	-	-	-	GO:0016021//integral component of membrane	-	-
367	MSTRG.2717.1	Os01g0710700	-	Lipase, class 3 family protein	-	-	-	-	GO:0005737//cytoplasm	GO:0008970//phosphatidylcholine 1-acylhydrolase activity;GO:0016787//hydrolase activity	GO:0006629//lipid metabolic process;GO:0016042//lipid catabolic process
368	MSTRG.2719.1	Os01g0710200	PAO1	Polyamine oxidase, Polyamine catabolis	Metabolism;Metabolism;Metabolism	Global and overview maps;Amino acid metabolism;Metabolism of other amino acids	ko01100//Metabolic pathways;ko00330//Arginine and proline metabolism;ko00410//beta-Alanine metabolism	K12259;K12259;K12259	GO:0005737//cytoplasm	GO:0016491//oxidoreductase activity;GO:0046592//polyamine oxidase activity;GO:0050660//flavin adenine dinucleotide binding;GO:0052894//norspermine:oxygen oxidoreductase activity;GO:0052901//spermine:oxygen oxidoreductase (spermidine-forming) activity;GO:0052903//N1-acetylspermine:oxygen oxidoreductase (3-acetamidopropanal-forming) activity;GO:1990534//thermospermine oxidase activity	GO:0046208//spermine catabolic process;GO:0048510//regulation of timing of transition from vegetative to reproductive phase;GO:0055114//oxidation-reduction process;GO:1903602//thermospermine catabolic process
368	MSTRG.2719.1	Os01g0710300	-	Conserved hypothetical protein	-	-	-	-	GO:0016021//integral component of membrane	-	-
368	MSTRG.2719.1	Os01g0710700	-	Lipase, class 3 family protein	-	-	-	-	GO:0005737//cytoplasm	GO:0008970//phosphatidylcholine 1-acylhydrolase activity;GO:0016787//hydrolase activity	GO:0006629//lipid metabolic process;GO:0016042//lipid catabolic process
369	MSTRG.2720.1	Os01g0710250	-	Hypothetical conserved gene	-	-	-	-	-	-	-
369	MSTRG.2720.1	Os01g0710300	-	Conserved hypothetical protein	-	-	-	-	GO:0016021//integral component of membrane	-	-
369	MSTRG.2720.1	Os01g0710700	-	Lipase, class 3 family protein	-	-	-	-	GO:0005737//cytoplasm	GO:0008970//phosphatidylcholine 1-acylhydrolase activity;GO:0016787//hydrolase activity	GO:0006629//lipid metabolic process;GO:0016042//lipid catabolic process
369	MSTRG.2720.1	Os01g0710800	-	Conserved hypothetical protein	-	-	-	-	-	-	-
369	MSTRG.2720.1	Os01g0711000	-	Similar to Vacuolar ATP synthase subunit B isoform 2 (EC 3.6.3.14) (V-ATPase B subunit 2) (Vacuolar proton pump B subunit 2)	Metabolism;Metabolism;Cellular Processes	Global and overview maps;Energy metabolism;Transport and catabolism	ko01100//Metabolic pathways;ko00190//Oxidative phosphorylation;ko04145//Phagosome	K02147;K02147;K02147	GO:0005739//mitochondrion;GO:0005743//mitochondrial inner membrane;GO:0009507//chloroplast;GO:0009535//chloroplast thylakoid membrane;GO:0009536//plastid;GO:0009579//thylakoid;GO:0016020//membrane;GO:0033180//proton-transporting V-type ATPase, V1 domain;GO:0045261//proton-transporting ATP synthase complex, catalytic core F(1)	GO:0000166//nucleotide binding;GO:0005524//ATP binding;GO:0032559//adenyl ribonucleotide binding;GO:0046933//proton-transporting ATP synthase activity, rotational mechanism	GO:0006754//ATP biosynthetic process;GO:0006811//ion transport;GO:0015986//ATP synthesis coupled proton transport;GO:0015991//ATP hydrolysis coupled proton transport;GO:0046034//ATP metabolic process;GO:1902600//hydrogen ion transmembrane transport
370	MSTRG.2727.1	Os01g0711200	-	Tyrosine protein kinase domain containing protein	-	-	-	-	GO:0016021//integral component of membrane	GO:0004672//protein kinase activity;GO:0005515//protein binding;GO:0005524//ATP binding	GO:0006468//protein phosphorylation
370	MSTRG.2727.1	Os01g0711400	-	Similar to Victorin binding protein	Metabolism;Metabolism;Metabolism;Metabolism;Metabolism	Global and overview maps;Global and overview maps;Global and overview maps;Carbohydrate metabolism;Amino acid metabolism	ko01100//Metabolic pathways;ko01110//Biosynthesis of secondary metabolites;ko01200//Carbon metabolism;ko00630//Glyoxylate and dicarboxylate metabolism;ko00260//Glycine, serine and threonine metabolism	K00281;K00281;K00281;K00281;K00281	GO:0005739//mitochondrion;GO:0005960//glycine cleavage complex;GO:0009941//chloroplast envelope;GO:0048046//apoplast	GO:0003824//catalytic activity;GO:0004375//glycine dehydrogenase (decarboxylating) activity;GO:0016594//glycine binding;GO:0030170//pyridoxal phosphate binding	GO:0006546//glycine catabolic process;GO:0019464//glycine decarboxylation via glycine cleavage system;GO:0055114//oxidation-reduction process
370	MSTRG.2727.1	Os01g0711500	OsCBL10	Calcineurin B-like protein, Calcium sensor, Flooding response during seed germinatio	-	-	-	-	-	GO:0005509//calcium ion binding;GO:0046872//metal ion binding	-
370	MSTRG.2727.1	Os01g0711600	OsRTH1	Protein of unknown function DUF778 family protein	Environmental Information Processing	Signal transduction	ko04016//MAPK signaling pathway - plant	K20726	GO:0016020//membrane;GO:0016021//integral component of membrane	-	-
371	MSTRG.2728.1	Os01g0711500	OsCBL10	Calcineurin B-like protein, Calcium sensor, Flooding response during seed germinatio	-	-	-	-	-	GO:0005509//calcium ion binding;GO:0046872//metal ion binding	-
371	MSTRG.2728.1	Os01g0711600	OsRTH1	Protein of unknown function DUF778 family protein	Environmental Information Processing	Signal transduction	ko04016//MAPK signaling pathway - plant	K20726	GO:0016020//membrane;GO:0016021//integral component of membrane	-	-
372	MSTRG.2754.1	Os01g0716450	-	Hypothetical gene	-	-	-	-	GO:0016020//membrane;GO:0016021//integral component of membrane	-	-
372	MSTRG.2754.1	Os01g0716500	-	Methyltransferase type 12 domain containing protein	-	-	-	-	-	-	-
372	MSTRG.2754.1	Os01g0716550	-	Non-protein coding transcript	-	-	-	-	-	-	-
373	MSTRG.2775.1	Os01g0720600	SSIVA	Similar to Starch synthase IV	Metabolism;Metabolism;Metabolism	Global and overview maps;Global and overview maps;Carbohydrate metabolism	ko01100//Metabolic pathways;ko01110//Biosynthesis of secondary metabolites;ko00500//Starch and sucrose metabolism	K00703;K00703;K00703	GO:0009501//amyloplast;GO:0009507//chloroplast	GO:0004373//glycogen (starch) synthase activity;GO:0016757//transferase activity, transferring glycosyl groups	GO:0019252//starch biosynthetic process
373	MSTRG.2775.1	Os01g0720700	OsSAT	Similar to satase isoform I	-	-	-	-	-	-	-
373	MSTRG.2775.1	Os01g0720800	OsSTA31	Hypothetical conserved gene	-	-	-	-	-	GO:0043531//ADP binding	-
373	MSTRG.2775.1	Os01g0720801	-	Hypothetical gene	-	-	-	-	-	-	-
373	MSTRG.2775.1	Os01g0720900	-	Hypothetical conserved gene	-	-	-	-	-	GO:0043531//ADP binding	-
374	MSTRG.2799.1	Os01g0724500	OsABCG38	Similar to ABC transporter (PDR5-like) isolog (PDR1 ABC transporter)	-	-	-	-	GO:0016020//membrane;GO:0016021//integral component of membrane	-	-
374	MSTRG.2799.1	Os01g0724700	-	Similar to lachrymatory-factor synthase	-	-	-	-	-	-	-
374	MSTRG.2799.1	Os01g0725000	-	Similar to H0402C08.3 protein	-	-	-	-	-	-	-
375	MSTRG.2802.1	Os01g0725900	-	Similar to arabinogalactan protein	-	-	-	-	GO:0071944//cell periphery	-	-
375	MSTRG.2802.1	Os01g0725400	-	Uncharacterised protein family UPF0497, trans-membrane plant subgroup domain containing protein	-	-	-	-	GO:0005886//plasma membrane;GO:0016020//membrane;GO:0016021//integral component of membrane	GO:0051539//4 iron, 4 sulfur cluster binding	-
375	MSTRG.2802.1	Os01g0725800	OsWD40-24	WD40/YVTN repeat-like domain containing protein	-	-	-	-	-	GO:0004672//protein kinase activity;GO:0005515//protein binding;GO:0005524//ATP binding	GO:0006468//protein phosphorylation
376	MSTRG.2803.1	Os01g0725900	-	Similar to arabinogalactan protein	-	-	-	-	GO:0071944//cell periphery	-	-
376	MSTRG.2803.1	Os01g0725400	-	Uncharacterised protein family UPF0497, trans-membrane plant subgroup domain containing protein	-	-	-	-	GO:0005886//plasma membrane;GO:0016020//membrane;GO:0016021//integral component of membrane	GO:0051539//4 iron, 4 sulfur cluster binding	-
376	MSTRG.2803.1	Os01g0725800	OsWD40-24	WD40/YVTN repeat-like domain containing protein	-	-	-	-	-	GO:0004672//protein kinase activity;GO:0005515//protein binding;GO:0005524//ATP binding	GO:0006468//protein phosphorylation
377	MSTRG.2804.1	Os01g0725600	-	Regulator of chromosome condensation, RCC1 domain containing protein	-	-	-	-	-	-	-
377	MSTRG.2804.1	Os01g0725900	-	Similar to arabinogalactan protein	-	-	-	-	GO:0071944//cell periphery	-	-
377	MSTRG.2804.1	Os01g0725400	-	Uncharacterised protein family UPF0497, trans-membrane plant subgroup domain containing protein	-	-	-	-	GO:0005886//plasma membrane;GO:0016020//membrane;GO:0016021//integral component of membrane	GO:0051539//4 iron, 4 sulfur cluster binding	-
377	MSTRG.2804.1	Os01g0725800	OsWD40-24	WD40/YVTN repeat-like domain containing protein	-	-	-	-	-	GO:0004672//protein kinase activity;GO:0005515//protein binding;GO:0005524//ATP binding	GO:0006468//protein phosphorylation
378	MSTRG.2808.1	Os01g0726001	-	Hypothetical gene	-	-	-	-	-	-	-
378	MSTRG.2808.1	Os01g0726100	-	Pollen Ole e 1 allergen and extensin domain containing protein	-	-	-	-	GO:0071944//cell periphery	-	-
379	MSTRG.2813.2	Os01g0727100	-	Glycosyl transferase, family 8 protein	-	-	-	-	GO:0000139//Golgi membrane;GO:0005794//Golgi apparatus	GO:0016740//transferase activity;GO:0016757//transferase activity, transferring glycosyl groups;GO:0047262//polygalacturonate 4-alpha-galacturonosyltransferase activity	GO:0045489//pectin biosynthetic process;GO:0071555//cell wall organization
379	MSTRG.2813.2	Os01g0727200	-	Hypothetical conserved gene	-	-	-	-	-	-	-
380	MSTRG.2824.1	Os01g0728000	-	Conserved hypothetical protein	-	-	-	-	-	-	-
380	MSTRG.2824.1	Os01g0728150	-	Similar to HVA22F (HVA22-LIKE PROTEIN F)	-	-	-	-	GO:0016020//membrane;GO:0016021//integral component of membrane	-	-
380	MSTRG.2824.1	Os01g0728200	-	Conserved hypothetical protein	-	-	-	-	-	-	-
380	MSTRG.2824.1	Os01g0728250	-	Conserved hypothetical protein	-	-	-	-	-	-	-
380	MSTRG.2824.1	Os01g0728300	-	Similar to Cytochrome P450 monooxygenase CYP72A5 (Fragment)	-	-	-	-	GO:0016021//integral component of membrane	GO:0004497//monooxygenase activity;GO:0005506//iron ion binding;GO:0016705//oxidoreductase activity, acting on paired donors, with incorporation or reduction of molecular oxygen;GO:0020037//heme binding	GO:0055114//oxidation-reduction process
380	MSTRG.2824.1	Os01g0728325	-	Hypothetical protein	-	-	-	-	-	-	-
381	MSTRG.2838.1	Os01g0728900	-	Hypothetical protein	-	-	-	-	-	-	-
381	MSTRG.2838.1	Os01g0729200	-	Conserved hypothetical protein	-	-	-	-	-	-	-
381	MSTRG.2838.1	Os01g0729400	-	Similar to Too many mouths protein	-	-	-	-	-	GO:0005515//protein binding	-
382	MSTRG.2840.1	Os01g0728900	-	Hypothetical protein	-	-	-	-	-	-	-
382	MSTRG.2840.1	Os01g0729200	-	Conserved hypothetical protein	-	-	-	-	-	-	-
382	MSTRG.2840.1	Os01g0729400	-	Similar to Too many mouths protein	-	-	-	-	-	GO:0005515//protein binding	-
382	MSTRG.2840.1	Os01g0729500	-	Conserved hypothetical protein	-	-	-	-	GO:0016020//membrane;GO:0016021//integral component of membrane	-	-
382	MSTRG.2840.1	Os01g0729600	-	Pyridoxal phosphate-dependent transferase, major region, subdomain 1 domain containing protein	-	-	-	-	-	GO:0003824//catalytic activity;GO:0008483//transaminase activity	-
382	MSTRG.2840.1	Os01g0729700	-	Hypothetical protein	-	-	-	-	-	-	-
383	MSTRG.2845.1	Os01g0729900	-	Conserved hypothetical protein	-	-	-	-	-	-	-
383	MSTRG.2845.1	Os01g0729950	-	Hypothetical protein	-	-	-	-	-	-	-
383	MSTRG.2845.1	MSTRG.2846	--	OSJNBa0084N21.7 [Oryza sativa Japonica Group]	-	-	-	-	GO:0043231//intracellular membrane-bounded organelle	-	GO:0010466//negative regulation of peptidase activity
383	MSTRG.2845.1	MSTRG.2847	--	OJ000114_01.17 [Oryza sativa Japonica Group]	-	-	-	-	GO:0043231//intracellular membrane-bounded organelle	-	GO:0010466//negative regulation of peptidase activity
384	MSTRG.2853.1	Os01g0730400	OsCEP6	Conserved hypothetical protein	-	-	-	-	-	-	-
384	MSTRG.2853.1	Os01g0730450	-	Hypothetical protein	-	-	-	-	-	-	-
384	MSTRG.2853.1	Os01g0730600	-	Conserved hypothetical protein	-	-	-	-	-	-	-
384	MSTRG.2853.1	Os01g0730700	OsWRKY14	WRKY transcription factor 14 (WRKY14)	-	-	-	-	GO:0005634//nucleus	GO:0003677//DNA binding;GO:0003700//transcription factor activity, sequence-specific DNA binding;GO:0043565//sequence-specific DNA binding	GO:0006355//regulation of transcription, DNA-templated
384	MSTRG.2853.1	Os01g0730500	OsDjC13	Similar to Ferredoxin (Bacterial type ferredoxin family)	-	-	-	-	-	GO:0005506//iron ion binding;GO:0009055//electron carrier activity	GO:0022900//electron transport chain
385	MSTRG.2859.1	Os01g0730900	-	DNA polymerase III, subunits gamma and tau domain containing protein	-	-	-	-	GO:0005634//nucleus;GO:0005663//DNA replication factor C complex;GO:0009360//DNA polymerase III complex;GO:0016021//integral component of membrane	GO:0003689//DNA clamp loader activity;GO:0003887//DNA-directed DNA polymerase activity;GO:0005524//ATP binding	GO:0006260//DNA replication;GO:0006261//DNA-dependent DNA replication;GO:0006281//DNA repair;GO:0071897//DNA biosynthetic process
385	MSTRG.2859.1	Os01g0731100	-	Similar to Pathogen-related protein	-	-	-	-	-	-	-
385	MSTRG.2859.1	Os01g0731150	-	Hypothetical protein	-	-	-	-	-	-	-
386	MSTRG.2867.1	Os01g0731800	-	Zinc finger, RING/FYVE/PHD-type domain containing protein	-	-	-	-	GO:0016020//membrane;GO:0016021//integral component of membrane	GO:0008270//zinc ion binding;GO:0046872//metal ion binding	-
386	MSTRG.2867.1	Os01g0732000	-	Similar to Mitochondrial import receptor subunit TOM7-1 (Translocase of outer membrane 7 kDa subunit 1)	-	-	-	-	GO:0005742//mitochondrial outer membrane translocase complex	-	GO:0030150//protein import into mitochondrial matrix
386	MSTRG.2867.1	Os01g0732300	OsOFP3	Protein of unknown function DUF623, plant domain containing protein	-	-	-	-	-	-	GO:0045892//negative regulation of transcription, DNA-templated
386	MSTRG.2867.1	Os01g0732200	-	GTP-binding protein, HSR1-related domain containing protein	-	-	-	-	-	GO:0005525//GTP binding	-
387	MSTRG.2868.2	Os01g0732000	-	Similar to Mitochondrial import receptor subunit TOM7-1 (Translocase of outer membrane 7 kDa subunit 1)	-	-	-	-	GO:0005742//mitochondrial outer membrane translocase complex	-	GO:0030150//protein import into mitochondrial matrix
387	MSTRG.2868.2	Os01g0732100	-	Conserved hypothetical protein	-	-	-	-	GO:0005747//mitochondrial respiratory chain complex I;GO:0016020//membrane;GO:0016021//integral component of membrane	-	-
387	MSTRG.2868.2	Os01g0732300	OsOFP3	Protein of unknown function DUF623, plant domain containing protein	-	-	-	-	-	-	GO:0045892//negative regulation of transcription, DNA-templated
387	MSTRG.2868.2	MSTRG.2869	RE1	Os05g0235100, partial [Oryza sativa Japonica Group]	-	-	-	-	GO:0043231//intracellular membrane-bounded organelle	-	GO:0006259//DNA metabolic process
388	MSTRG.2906.1	Os01g0737200	-	Non-protein coding transcript	-	-	-	-	-	-	-
388	MSTRG.2906.1	Os01g0737300	-	Similar to Phosphoesterase	-	-	-	-	-	GO:0003677//DNA binding;GO:0003690//double-stranded DNA binding;GO:0008270//zinc ion binding;GO:0046403//polynucleotide 3'-phosphatase activity;GO:0046404//ATP-dependent polydeoxyribonucleotide 5'-hydroxyl-kinase activity;GO:0050145//nucleoside phosphate kinase activity	GO:0006281//DNA repair;GO:0046939//nucleotide phosphorylation;GO:0046940//nucleoside monophosphate phosphorylation;GO:0098504//DNA 3' dephosphorylation involved in DNA repair;GO:0098506//polynucleotide 3' dephosphorylation
388	MSTRG.2906.1	Os01g0737401	-	Similar to diphosphonucleotide phosphatase 2	-	-	-	-	-	GO:0003690//double-stranded DNA binding;GO:0046403//polynucleotide 3'-phosphatase activity;GO:0046404//ATP-dependent polydeoxyribonucleotide 5'-hydroxyl-kinase activity;GO:0050145//nucleoside phosphate kinase activity	GO:0006281//DNA repair;GO:0046939//nucleotide phosphorylation;GO:0046940//nucleoside monophosphate phosphorylation;GO:0098506//polynucleotide 3' dephosphorylation
388	MSTRG.2906.1	MSTRG.2907	--	subtilase-like [Oryza sativa Japonica Group]	-	-	-	-	-	-	-
388	MSTRG.2906.1	Os01g0737500	OsALMT5	Uncharacterised protein family UPF0005 domain containing protein	-	-	-	-	GO:0009705//plant-type vacuole membrane;GO:0016020//membrane;GO:0016021//integral component of membrane	-	GO:0015743//malate transport
388	MSTRG.2906.1	Os01g0737550	-	Similar to OSIGBa0101A01.4 protein	-	-	-	-	-	-	-
388	MSTRG.2906.1	Os01g0737700	-	Similar to OSIGBa0101A01.4 protein	-	-	-	-	GO:0005737//cytoplasm	GO:0003676//nucleic acid binding;GO:0008408//3'-5' exonuclease activity	GO:0006139//nucleobase-containing compound metabolic process;GO:0090305//nucleic acid phosphodiester bond hydrolysis
388	MSTRG.2906.1	Os01g0737600	-	Similar to OSIGBa0101A01.4 protein	-	-	-	-	GO:0005737//cytoplasm	GO:0003676//nucleic acid binding;GO:0008408//3'-5' exonuclease activity	GO:0006139//nucleobase-containing compound metabolic process;GO:0090305//nucleic acid phosphodiester bond hydrolysis
389	MSTRG.2931.1	Os01g0741900	IAA6	Auxin-responsive protein, Drought tolerance, Control of tiller outgrowt	Environmental Information Processing	Signal transduction	ko04075//Plant hormone signal transduction	K14484	GO:0005634//nucleus	GO:0005515//protein binding	GO:0006355//regulation of transcription, DNA-templated;GO:0006417//regulation of translation;GO:0009733//response to auxin;GO:0009734//auxin-activated signaling pathway
389	MSTRG.2931.1	Os01g0742000	-	tRNA/rRNA methyltransferase, SpoU domain containing protein	-	-	-	-	GO:0009507//chloroplast	GO:0003723//RNA binding;GO:0008173//RNA methyltransferase activity	GO:0001510//RNA methylation;GO:0006396//RNA processing
389	MSTRG.2931.1	Os01g0742100	-	Hypothetical protein	-	-	-	-	-	-	-
390	MSTRG.2933.1	Os01g0742000	-	tRNA/rRNA methyltransferase, SpoU domain containing protein	-	-	-	-	GO:0009507//chloroplast	GO:0003723//RNA binding;GO:0008173//RNA methyltransferase activity	GO:0001510//RNA methylation;GO:0006396//RNA processing
390	MSTRG.2933.1	Os01g0742100	-	Hypothetical protein	-	-	-	-	-	-	-
391	MSTRG.2934.1	Os01g0741900	IAA6	Auxin-responsive protein, Drought tolerance, Control of tiller outgrowt	Environmental Information Processing	Signal transduction	ko04075//Plant hormone signal transduction	K14484	GO:0005634//nucleus	GO:0005515//protein binding	GO:0006355//regulation of transcription, DNA-templated;GO:0006417//regulation of translation;GO:0009733//response to auxin;GO:0009734//auxin-activated signaling pathway
391	MSTRG.2934.1	Os01g0742000	-	tRNA/rRNA methyltransferase, SpoU domain containing protein	-	-	-	-	GO:0009507//chloroplast	GO:0003723//RNA binding;GO:0008173//RNA methyltransferase activity	GO:0001510//RNA methylation;GO:0006396//RNA processing
391	MSTRG.2934.1	Os01g0742100	-	Hypothetical protein	-	-	-	-	-	-	-
391	MSTRG.2934.1	Os01g0742150	-	Non-protein coding transcript	-	-	-	-	-	-	-
392	MSTRG.2935.1	Os01g0741900	IAA6	Auxin-responsive protein, Drought tolerance, Control of tiller outgrowt	Environmental Information Processing	Signal transduction	ko04075//Plant hormone signal transduction	K14484	GO:0005634//nucleus	GO:0005515//protein binding	GO:0006355//regulation of transcription, DNA-templated;GO:0006417//regulation of translation;GO:0009733//response to auxin;GO:0009734//auxin-activated signaling pathway
392	MSTRG.2935.1	Os01g0742000	-	tRNA/rRNA methyltransferase, SpoU domain containing protein	-	-	-	-	GO:0009507//chloroplast	GO:0003723//RNA binding;GO:0008173//RNA methyltransferase activity	GO:0001510//RNA methylation;GO:0006396//RNA processing
392	MSTRG.2935.1	Os01g0742100	-	Hypothetical protein	-	-	-	-	-	-	-
392	MSTRG.2935.1	Os01g0742150	-	Non-protein coding transcript	-	-	-	-	-	-	-
392	MSTRG.2935.1	Os01g0742200	-	Similar to Elongation factor EF-2 (Fragment)	-	-	-	-	GO:0005829//cytosol;GO:1990904//ribonucleoprotein complex	GO:0003746//translation elongation factor activity;GO:0003924//GTPase activity;GO:0005525//GTP binding;GO:0043022//ribosome binding	GO:0006414//translational elongation
393	MSTRG.2946.1	Os01g0742200	-	Similar to Elongation factor EF-2 (Fragment)	-	-	-	-	GO:0005829//cytosol;GO:1990904//ribonucleoprotein complex	GO:0003746//translation elongation factor activity;GO:0003924//GTPase activity;GO:0005525//GTP binding;GO:0043022//ribosome binding	GO:0006414//translational elongation
393	MSTRG.2946.1	Os01g0742250	-	Hypothetical protein	-	-	-	-	-	-	-
393	MSTRG.2946.1	Os01g0742500	OsHXK6	Similar to Hexokinase	Metabolism;Metabolism;Metabolism;Metabolism;Metabolism;Metabolism;Metabolism;Metabolism	Global and overview maps;Global and overview maps;Global and overview maps;Carbohydrate metabolism;Carbohydrate metabolism;Carbohydrate metabolism;Carbohydrate metabolism;Carbohydrate metabolism	ko01100//Metabolic pathways;ko01110//Biosynthesis of secondary metabolites;ko01200//Carbon metabolism;ko00500//Starch and sucrose metabolism;ko00520//Amino sugar and nucleotide sugar metabolism;ko00010//Glycolysis / Gluconeogenesis;ko00051//Fructose and mannose metabolism;ko00052//Galactose metabolism	K00844;K00844;K00844;K00844;K00844;K00844;K00844;K00844	GO:0005623//cell;GO:0005739//mitochondrion;GO:0005829//cytosol;GO:0009507//chloroplast;GO:0009527//plastid outer membrane;GO:0009536//plastid;GO:0009707//chloroplast outer membrane;GO:0016020//membrane;GO:0016021//integral component of membrane	GO:0000166//nucleotide binding;GO:0004340//glucokinase activity;GO:0004396//hexokinase activity;GO:0005524//ATP binding;GO:0005536//glucose binding;GO:0008865//fructokinase activity;GO:0016301//kinase activity;GO:0016740//transferase activity;GO:0016773//phosphotransferase activity, alcohol group as acceptor;GO:0019158//mannokinase activity	GO:0001678//cellular glucose homeostasis;GO:0005975//carbohydrate metabolic process;GO:0006096//glycolytic process;GO:0009749//response to glucose;GO:0016310//phosphorylation;GO:0019318//hexose metabolic process;GO:0046835//carbohydrate phosphorylation;GO:0051156//glucose 6-phosphate metabolic process
393	MSTRG.2946.1	Os01g0742766	-	Hypothetical conserved gene	-	-	-	-	GO:0005634//nucleus;GO:0070876//SOSS complex	-	GO:0006281//DNA repair;GO:0006974//cellular response to DNA damage stimulus
393	MSTRG.2946.1	Os01g0742300	-	3-hydroxyacid dehydrogenase/reductase domain containing protein	Metabolism;Metabolism	Global and overview maps;Amino acid metabolism	ko01100//Metabolic pathways;ko00280//Valine, leucine and isoleucine degradation	K00020;K00020	GO:0005829//cytosol	GO:0016491//oxidoreductase activity;GO:0050661//NADP binding;GO:0051287//NAD binding	GO:0055114//oxidation-reduction process
393	MSTRG.2946.1	Os01g0742350	-	Conserved hypothetical protein	-	-	-	-	-	-	-
394	MSTRG.2965.1	Os01g0744300	-	Similar to Casein kinase-like protein	-	-	-	-	GO:0005634//nucleus;GO:0005737//cytoplasm	GO:0004672//protein kinase activity;GO:0004674//protein serine/threonine kinase activity;GO:0005524//ATP binding	GO:0006468//protein phosphorylation;GO:0006897//endocytosis;GO:0018105//peptidyl-serine phosphorylation;GO:0018107//peptidyl-threonine phosphorylation
395	MSTRG.2962.2	Os01g0744700	-	Protein of unknown function DUF1677, plant domain containing protein	-	-	-	-	-	-	-
396	MSTRG.2974.2	Os01g0747500	-	Similar to Dihydroorotase (EC 3.5.2.3)	Metabolism;Metabolism	Global and overview maps;Nucleotide metabolism	ko01100//Metabolic pathways;ko00240//Pyrimidine metabolism	K01465;K01465	GO:0005737//cytoplasm;GO:0005739//mitochondrion;GO:0009507//chloroplast	GO:0004151//dihydroorotase activity;GO:0016787//hydrolase activity;GO:0016812//hydrolase activity, acting on carbon-nitrogen (but not peptide) bonds, in cyclic amides;GO:0046872//metal ion binding	GO:0006207//'de novo' pyrimidine nucleobase biosynthetic process;GO:0006221//pyrimidine nucleotide biosynthetic process;GO:0019856//pyrimidine nucleobase biosynthetic process;GO:0044205//'de novo' UMP biosynthetic process
396	MSTRG.2974.2	Os01g0747600	-	Pentatricopeptide repeat domain containing protein	-	-	-	-	GO:0005739//mitochondrion	GO:0005515//protein binding	-
396	MSTRG.2974.2	Os01g0747750	-	Hypothetical conserved gene	-	-	-	-	-	-	-
396	MSTRG.2974.2	Os01g0747800	OsVQ3	VQ domain containing protein	-	-	-	-	-	-	-
397	MSTRG.2979.1	Os01g0748150	OsENODL1	Cupredoxin domain containing protein	-	-	-	-	GO:0005773//vacuole;GO:0016020//membrane;GO:0031225//anchored component of membrane;GO:0032578//aleurone grain membrane;GO:0046658//anchored component of plasma membrane	GO:0009055//electron carrier activity	GO:0022900//electron transport chain
397	MSTRG.2979.1	Os01g0748200	-	Conserved hypothetical protein	-	-	-	-	GO:0016020//membrane;GO:0016021//integral component of membrane	-	-
397	MSTRG.2979.1	Os01g0748000	-	Similar to Dynamin family protein	-	-	-	-	GO:0005737//cytoplasm;GO:0009504//cell plate;GO:0016020//membrane	GO:0000166//nucleotide binding;GO:0003924//GTPase activity;GO:0005525//GTP binding;GO:0008017//microtubule binding	GO:0000911//cytokinesis by cell plate formation
397	MSTRG.2979.1	Os01g0748300	-	Protein of unknown function DUF584 domain containing protein	-	-	-	-	-	-	-
398	MSTRG.2993.2	Os01g0750000	OsRab11D2	Similar to ras-related protein RIC2	-	-	-	-	GO:0005768//endosome;GO:0012505//endomembrane system	GO:0003924//GTPase activity;GO:0005525//GTP binding	GO:0006886//intracellular protein transport;GO:0032482//Rab protein signal transduction
398	MSTRG.2993.2	Os01g0750050	-	Non-protein coding transcript	-	-	-	-	-	-	-
398	MSTRG.2993.2	Os01g0750100	WRKY13	Similar to WRKY transcription factor-like (WRKY transcription factor 13) (WRKY13)	-	-	-	-	GO:0005634//nucleus	GO:0003677//DNA binding;GO:0003700//transcription factor activity, sequence-specific DNA binding;GO:0043565//sequence-specific DNA binding;GO:0044212//transcription regulatory region DNA binding	GO:0006355//regulation of transcription, DNA-templated
398	MSTRG.2993.2	Os01g0750300	OsCesA4	Similar to Cellulose synthase (Fragment)	-	-	-	-	GO:0005618//cell wall;GO:0005794//Golgi apparatus;GO:0005802//trans-Golgi network;GO:0005886//plasma membrane;GO:0016020//membrane;GO:0016021//integral component of membrane	GO:0016740//transferase activity;GO:0016757//transferase activity, transferring glycosyl groups;GO:0016759//cellulose synthase activity;GO:0016760//cellulose synthase (UDP-forming) activity;GO:0046872//metal ion binding	GO:0006970//response to osmotic stress;GO:0009414//response to water deprivation;GO:0009833//plant-type primary cell wall biogenesis;GO:0009834//plant-type secondary cell wall biogenesis;GO:0030244//cellulose biosynthetic process;GO:0042742//defense response to bacterium;GO:0050832//defense response to fungus;GO:0071555//cell wall organization
399	MSTRG.2993.3	Os01g0750000	OsRab11D2	Similar to ras-related protein RIC2	-	-	-	-	GO:0005768//endosome;GO:0012505//endomembrane system	GO:0003924//GTPase activity;GO:0005525//GTP binding	GO:0006886//intracellular protein transport;GO:0032482//Rab protein signal transduction
399	MSTRG.2993.3	Os01g0750050	-	Non-protein coding transcript	-	-	-	-	-	-	-
399	MSTRG.2993.3	Os01g0750100	WRKY13	Similar to WRKY transcription factor-like (WRKY transcription factor 13) (WRKY13)	-	-	-	-	GO:0005634//nucleus	GO:0003677//DNA binding;GO:0003700//transcription factor activity, sequence-specific DNA binding;GO:0043565//sequence-specific DNA binding;GO:0044212//transcription regulatory region DNA binding	GO:0006355//regulation of transcription, DNA-templated
399	MSTRG.2993.3	Os01g0750300	OsCesA4	Similar to Cellulose synthase (Fragment)	-	-	-	-	GO:0005618//cell wall;GO:0005794//Golgi apparatus;GO:0005802//trans-Golgi network;GO:0005886//plasma membrane;GO:0016020//membrane;GO:0016021//integral component of membrane	GO:0016740//transferase activity;GO:0016757//transferase activity, transferring glycosyl groups;GO:0016759//cellulose synthase activity;GO:0016760//cellulose synthase (UDP-forming) activity;GO:0046872//metal ion binding	GO:0006970//response to osmotic stress;GO:0009414//response to water deprivation;GO:0009833//plant-type primary cell wall biogenesis;GO:0009834//plant-type secondary cell wall biogenesis;GO:0030244//cellulose biosynthetic process;GO:0042742//defense response to bacterium;GO:0050832//defense response to fungus;GO:0071555//cell wall organization
400	MSTRG.2995.1	Os01g0750400	-	Leucine-rich repeat domain containing protein	-	-	-	-	GO:0016020//membrane;GO:0016021//integral component of membrane	GO:0005515//protein binding	-
400	MSTRG.2995.1	MSTRG.2996	--	Os08g0481151 [Oryza sativa Japonica Group]	-	-	-	-	GO:0043231//intracellular membrane-bounded organelle	-	GO:0010466//negative regulation of peptidase activity
400	MSTRG.2995.1	MSTRG.2997	TY3B-I	OSJNBa0081C01.21 [Oryza sativa Japonica Group]	-	-	-	-	GO:0043231//intracellular membrane-bounded organelle	-	GO:0010466//negative regulation of peptidase activity
401	MSTRG.2999.1	Os01g0750600	-	Protein kinase-like domain containing protein	-	-	-	-	GO:0005886//plasma membrane;GO:0016020//membrane;GO:0016021//integral component of membrane	GO:0004672//protein kinase activity;GO:0004675//transmembrane receptor protein serine/threonine kinase activity;GO:0005524//ATP binding	GO:0006468//protein phosphorylation;GO:0007178//transmembrane receptor protein serine/threonine kinase signaling pathway
401	MSTRG.2999.1	Os01g0750666	-	Hypothetical protein	-	-	-	-	-	-	-
402	MSTRG.3013.1	Os01g0752300	-	Similar to 60S ribosomal protein L18a-1	Genetic Information Processing	Translation	ko03010//Ribosome	K02882	GO:0005840//ribosome;GO:0022625//cytosolic large ribosomal subunit	GO:0003735//structural constituent of ribosome	GO:0006412//translation
402	MSTRG.3013.1	Os01g0752350	-	Hypothetical conserved gene	-	-	-	-	-	-	-
402	MSTRG.3013.1	Os01g0752400	-	Hypothetical conserved gene	-	-	-	-	GO:0016020//membrane;GO:0016021//integral component of membrane	-	-
402	MSTRG.3013.1	Os01g0752700	-	Similar to GTP-binding protein	-	-	-	-	GO:0005739//mitochondrion;GO:0005829//cytosol;GO:1990904//ribonucleoprotein complex	GO:0003924//GTPase activity;GO:0005525//GTP binding	-
402	MSTRG.3013.1	Os01g0752600	-	Glycosyl transferase, family 19 protein	Metabolism	Global and overview maps	ko01100//Metabolic pathways	K00748	GO:0005739//mitochondrion;GO:0005829//cytosol	GO:0005543//phospholipid binding;GO:0008915//lipid-A-disaccharide synthase activity	GO:0009245//lipid A biosynthetic process;GO:2001289//lipid X metabolic process
403	MSTRG.3028.1	Os01g0754200	OsGSL3	Glycosyl transferase, family 48 protein	-	-	-	-	GO:0000148//1,3-beta-D-glucan synthase complex;GO:0016020//membrane;GO:0016021//integral component of membrane	GO:0003843//1,3-beta-D-glucan synthase activity	GO:0006075//(1->3)-beta-D-glucan biosynthetic process
403	MSTRG.3028.1	Os01g0754300	-	Hypothetical protein	-	-	-	-	-	-	-
403	MSTRG.3028.1	Os01g0754700	-	Pentatricopeptide repeat domain containing protein	-	-	-	-	GO:0043231//intracellular membrane-bounded organelle	GO:0005515//protein binding	GO:0009451//RNA modification
404	MSTRG.3048.1	Os01g0759800	-	Hypothetical protein	-	-	-	-	-	-	-
404	MSTRG.3048.1	Os01g0759900	-	Similar to Permease 1	-	-	-	-	GO:0016020//membrane;GO:0016021//integral component of membrane	GO:0022857//transmembrane transporter activity	GO:0055085//transmembrane transport
404	MSTRG.3048.1	Os01g0760000	-	Similar to Dynein light chain	-	-	-	-	GO:0005737//cytoplasm;GO:0005856//cytoskeleton;GO:0005868//cytoplasmic dynein complex;GO:0005874//microtubule;GO:0030286//dynein complex	GO:0003774//motor activity;GO:0045505//dynein intermediate chain binding;GO:0051959//dynein light intermediate chain binding	GO:0007017//microtubule-based process;GO:2000582//positive regulation of ATP-dependent microtubule motor activity, plus-end-directed
404	MSTRG.3048.1	Os01g0760150	-	Non-protein coding transcript	-	-	-	-	-	-	-
404	MSTRG.3048.1	Os01g0760400	-	Toll-Interleukin receptor domain containing protein	-	-	-	-	GO:0005886//plasma membrane	GO:0005515//protein binding;GO:0043531//ADP binding	GO:0000725//recombinational repair;GO:0007165//signal transduction
405	MSTRG.3049.1	Os01g0759800	-	Hypothetical protein	-	-	-	-	-	-	-
405	MSTRG.3049.1	Os01g0759900	-	Similar to Permease 1	-	-	-	-	GO:0016020//membrane;GO:0016021//integral component of membrane	GO:0022857//transmembrane transporter activity	GO:0055085//transmembrane transport
405	MSTRG.3049.1	Os01g0760000	-	Similar to Dynein light chain	-	-	-	-	GO:0005737//cytoplasm;GO:0005856//cytoskeleton;GO:0005868//cytoplasmic dynein complex;GO:0005874//microtubule;GO:0030286//dynein complex	GO:0003774//motor activity;GO:0045505//dynein intermediate chain binding;GO:0051959//dynein light intermediate chain binding	GO:0007017//microtubule-based process;GO:2000582//positive regulation of ATP-dependent microtubule motor activity, plus-end-directed
405	MSTRG.3049.1	Os01g0760150	-	Non-protein coding transcript	-	-	-	-	-	-	-
405	MSTRG.3049.1	Os01g0760400	-	Toll-Interleukin receptor domain containing protein	-	-	-	-	GO:0005886//plasma membrane	GO:0005515//protein binding;GO:0043531//ADP binding	GO:0000725//recombinational repair;GO:0007165//signal transduction
405	MSTRG.3049.1	Os01g0760600	-	Aspartate aminotransferase, cytoplasmic (EC 2.6.1.1) (Transaminase A)	Metabolism;Metabolism;Metabolism;Metabolism;Metabolism;Metabolism;Metabolism;Metabolism;Metabolism;Metabolism;Metabolism;Metabolism;Metabolism;Metabolism;Metabolism	Global and overview maps;Global and overview maps;Global and overview maps;Global and overview maps;Amino acid metabolism;Energy metabolism;Amino acid metabolism;Global and overview maps;Amino acid metabolism;Amino acid metabolism;Amino acid metabolism;Amino acid metabolism;Amino acid metabolism;Biosynthesis of other secondary metabolites;Biosynthesis of other secondary metabolites	ko01100//Metabolic pathways;ko01110//Biosynthesis of secondary metabolites;ko01200//Carbon metabolism;ko01230//Biosynthesis of amino acids;ko00270//Cysteine and methionine metabolism;ko00710//Carbon fixation in photosynthetic organisms;ko00330//Arginine and proline metabolism;ko01210//2-Oxocarboxylic acid metabolism;ko00250//Alanine, aspartate and glutamate metabolism;ko00360//Phenylalanine metab…	K14454;K14454;K14454;K14454;K14454;K14454;K14454;K14454;K14454;K14454;K14454;K14454;K14454;K14454;K14454	GO:0005737//cytoplasm	GO:0003824//catalytic activity;GO:0004069//L-aspartate:2-oxoglutarate aminotransferase activity;GO:0008483//transaminase activity;GO:0016740//transferase activity;GO:0030170//pyridoxal phosphate binding	GO:0006099//tricarboxylic acid cycle;GO:0006103//2-oxoglutarate metabolic process;GO:0006520//cellular amino acid metabolic process;GO:0006522//alanine metabolic process;GO:0006531//aspartate metabolic process;GO:0006536//glutamate metabolic process;GO:0006807//nitrogen compound metabolic process;GO:0009058//biosynthetic process
405	MSTRG.3049.1	Os01g0760701	-	Hypothetical gene	-	-	-	-	-	-	-
406	MSTRG.3062.1	Os01g0762300	-	Similar to predicted protein	-	-	-	-	GO:0016020//membrane;GO:0016021//integral component of membrane	-	-
406	MSTRG.3062.1	Os01g0762500	Glua1*	Glutelin subunit mRNA	-	-	-	-	-	GO:0045735//nutrient reservoir activity	-
406	MSTRG.3062.1	Os01g0762601	-	Hypothetical protein	-	-	-	-	-	-	-
407	MSTRG.3069.1	Os01g0763600	-	PLC-like phosphodiesterase, TIM beta/alpha-barrel domain domain containing protein	Metabolism	Lipid metabolism	ko00564//Glycerophospholipid metabolism	K01126	-	GO:0008081//phosphoric diester hydrolase activity;GO:0008889//glycerophosphodiester phosphodiesterase activity	GO:0006629//lipid metabolic process
408	MSTRG.3072.1	Os01g0763300	-	Conserved hypothetical protein	-	-	-	-	-	-	-
408	MSTRG.3072.1	Os01g0763600	-	PLC-like phosphodiesterase, TIM beta/alpha-barrel domain domain containing protein	Metabolism	Lipid metabolism	ko00564//Glycerophospholipid metabolism	K01126	-	GO:0008081//phosphoric diester hydrolase activity;GO:0008889//glycerophosphodiester phosphodiesterase activity	GO:0006629//lipid metabolic process
408	MSTRG.3072.1	Os01g0763750	OsEXO70X1	Exo70 exocyst complex subunit family protein	-	-	-	-	GO:0000145//exocyst	-	GO:0006887//exocytosis;GO:0015031//protein transport
408	MSTRG.3072.1	Os01g0763850	-	Hypothetical protein	-	-	-	-	-	-	-
408	MSTRG.3072.1	Os01g0763900	-	X8 domain containing protein	-	-	-	-	-	GO:0016787//hydrolase activity	-
408	MSTRG.3072.1	Os01g0763800	-	Cytochrome P450, conserved site domain containing protein	-	-	-	-	GO:0016021//integral component of membrane	GO:0016705//oxidoreductase activity, acting on paired donors, with incorporation or reduction of molecular oxygen	GO:0055114//oxidation-reduction process
409	MSTRG.3078.3	Os01g0764300	-	Protein of unknown function DUF155 domain containing protein	-	-	-	-	GO:0005739//mitochondrion;GO:0016021//integral component of membrane	-	GO:0010082//regulation of root meristem growth;GO:0032875//regulation of DNA endoreduplication;GO:0051302//regulation of cell division
409	MSTRG.3078.3	Os01g0764400	CM	Similar to Chorismate mutase, chloroplast precursor (EC 5.4.99.5) (CM-1)	Metabolism;Metabolism;Metabolism;Metabolism	Global and overview maps;Global and overview maps;Global and overview maps;Amino acid metabolism	ko01100//Metabolic pathways;ko01110//Biosynthesis of secondary metabolites;ko01230//Biosynthesis of amino acids;ko00400//Phenylalanine, tyrosine and tryptophan biosynthesis	K01850;K01850;K01850;K01850	-	GO:0004106//chorismate mutase activity;GO:0016853//isomerase activity	GO:0008652//cellular amino acid biosynthetic process;GO:0009073//aromatic amino acid family biosynthetic process;GO:0046417//chorismate metabolic process
409	MSTRG.3078.3	Os01g0764600	-	Hypothetical conserved gene	Metabolism;Metabolism;Metabolism	Global and overview maps;Global and overview maps;Metabolism of terpenoids and polyketides	ko01100//Metabolic pathways;ko01110//Biosynthesis of secondary metabolites;ko00900//Terpenoid backbone biosynthesis	K06981;K06981;K06981	GO:0005737//cytoplasm;GO:0005829//cytosol	GO:0000166//nucleotide binding;GO:0005524//ATP binding;GO:0016301//kinase activity	GO:0016114//terpenoid biosynthetic process;GO:0016310//phosphorylation
409	MSTRG.3078.3	Os01g0764700	-	Resolvase, holliday junction-type, YqgF-like domain containing protein	-	-	-	-	-	-	GO:0000967//rRNA 5'-end processing;GO:0006139//nucleobase-containing compound metabolic process;GO:0006364//rRNA processing
409	MSTRG.3078.3	Os01g0764750	-	Non-protein coding transcript	-	-	-	-	-	-	-
409	MSTRG.3078.3	Os01g0764500	-	Similar to uvrB/uvrC motif-containing protein	-	-	-	-	GO:0009507//chloroplast	-	-
410	MSTRG.3078.4	Os01g0764300	-	Protein of unknown function DUF155 domain containing protein	-	-	-	-	GO:0005739//mitochondrion;GO:0016021//integral component of membrane	-	GO:0010082//regulation of root meristem growth;GO:0032875//regulation of DNA endoreduplication;GO:0051302//regulation of cell division
410	MSTRG.3078.4	Os01g0764400	CM	Similar to Chorismate mutase, chloroplast precursor (EC 5.4.99.5) (CM-1)	Metabolism;Metabolism;Metabolism;Metabolism	Global and overview maps;Global and overview maps;Global and overview maps;Amino acid metabolism	ko01100//Metabolic pathways;ko01110//Biosynthesis of secondary metabolites;ko01230//Biosynthesis of amino acids;ko00400//Phenylalanine, tyrosine and tryptophan biosynthesis	K01850;K01850;K01850;K01850	-	GO:0004106//chorismate mutase activity;GO:0016853//isomerase activity	GO:0008652//cellular amino acid biosynthetic process;GO:0009073//aromatic amino acid family biosynthetic process;GO:0046417//chorismate metabolic process
410	MSTRG.3078.4	Os01g0764600	-	Hypothetical conserved gene	Metabolism;Metabolism;Metabolism	Global and overview maps;Global and overview maps;Metabolism of terpenoids and polyketides	ko01100//Metabolic pathways;ko01110//Biosynthesis of secondary metabolites;ko00900//Terpenoid backbone biosynthesis	K06981;K06981;K06981	GO:0005737//cytoplasm;GO:0005829//cytosol	GO:0000166//nucleotide binding;GO:0005524//ATP binding;GO:0016301//kinase activity	GO:0016114//terpenoid biosynthetic process;GO:0016310//phosphorylation
410	MSTRG.3078.4	Os01g0764700	-	Resolvase, holliday junction-type, YqgF-like domain containing protein	-	-	-	-	-	-	GO:0000967//rRNA 5'-end processing;GO:0006139//nucleobase-containing compound metabolic process;GO:0006364//rRNA processing
410	MSTRG.3078.4	Os01g0764750	-	Non-protein coding transcript	-	-	-	-	-	-	-
410	MSTRG.3078.4	Os01g0764500	-	Similar to uvrB/uvrC motif-containing protein	-	-	-	-	GO:0009507//chloroplast	-	-
411	MSTRG.3079.1	Os01g0764400	CM	Similar to Chorismate mutase, chloroplast precursor (EC 5.4.99.5) (CM-1)	Metabolism;Metabolism;Metabolism;Metabolism	Global and overview maps;Global and overview maps;Global and overview maps;Amino acid metabolism	ko01100//Metabolic pathways;ko01110//Biosynthesis of secondary metabolites;ko01230//Biosynthesis of amino acids;ko00400//Phenylalanine, tyrosine and tryptophan biosynthesis	K01850;K01850;K01850;K01850	-	GO:0004106//chorismate mutase activity;GO:0016853//isomerase activity	GO:0008652//cellular amino acid biosynthetic process;GO:0009073//aromatic amino acid family biosynthetic process;GO:0046417//chorismate metabolic process
411	MSTRG.3079.1	Os01g0764600	-	Hypothetical conserved gene	Metabolism;Metabolism;Metabolism	Global and overview maps;Global and overview maps;Metabolism of terpenoids and polyketides	ko01100//Metabolic pathways;ko01110//Biosynthesis of secondary metabolites;ko00900//Terpenoid backbone biosynthesis	K06981;K06981;K06981	GO:0005737//cytoplasm;GO:0005829//cytosol	GO:0000166//nucleotide binding;GO:0005524//ATP binding;GO:0016301//kinase activity	GO:0016114//terpenoid biosynthetic process;GO:0016310//phosphorylation
411	MSTRG.3079.1	Os01g0764700	-	Resolvase, holliday junction-type, YqgF-like domain containing protein	-	-	-	-	-	-	GO:0000967//rRNA 5'-end processing;GO:0006139//nucleobase-containing compound metabolic process;GO:0006364//rRNA processing
411	MSTRG.3079.1	Os01g0764750	-	Non-protein coding transcript	-	-	-	-	-	-	-
411	MSTRG.3079.1	Os01g0764500	-	Similar to uvrB/uvrC motif-containing protein	-	-	-	-	GO:0009507//chloroplast	-	-
412	MSTRG.3080.1	Os01g0764400	CM	Similar to Chorismate mutase, chloroplast precursor (EC 5.4.99.5) (CM-1)	Metabolism;Metabolism;Metabolism;Metabolism	Global and overview maps;Global and overview maps;Global and overview maps;Amino acid metabolism	ko01100//Metabolic pathways;ko01110//Biosynthesis of secondary metabolites;ko01230//Biosynthesis of amino acids;ko00400//Phenylalanine, tyrosine and tryptophan biosynthesis	K01850;K01850;K01850;K01850	-	GO:0004106//chorismate mutase activity;GO:0016853//isomerase activity	GO:0008652//cellular amino acid biosynthetic process;GO:0009073//aromatic amino acid family biosynthetic process;GO:0046417//chorismate metabolic process
412	MSTRG.3080.1	Os01g0764600	-	Hypothetical conserved gene	Metabolism;Metabolism;Metabolism	Global and overview maps;Global and overview maps;Metabolism of terpenoids and polyketides	ko01100//Metabolic pathways;ko01110//Biosynthesis of secondary metabolites;ko00900//Terpenoid backbone biosynthesis	K06981;K06981;K06981	GO:0005737//cytoplasm;GO:0005829//cytosol	GO:0000166//nucleotide binding;GO:0005524//ATP binding;GO:0016301//kinase activity	GO:0016114//terpenoid biosynthetic process;GO:0016310//phosphorylation
412	MSTRG.3080.1	Os01g0764700	-	Resolvase, holliday junction-type, YqgF-like domain containing protein	-	-	-	-	-	-	GO:0000967//rRNA 5'-end processing;GO:0006139//nucleobase-containing compound metabolic process;GO:0006364//rRNA processing
412	MSTRG.3080.1	Os01g0764750	-	Non-protein coding transcript	-	-	-	-	-	-	-
412	MSTRG.3080.1	Os01g0764500	-	Similar to uvrB/uvrC motif-containing protein	-	-	-	-	GO:0009507//chloroplast	-	-
413	MSTRG.3094.1	Os01g0766400	-	Conserved hypothetical protein	-	-	-	-	GO:0000940//condensed chromosome outer kinetochore;GO:0005876//spindle microtubule	GO:0008017//microtubule binding	GO:0000278//mitotic cell cycle;GO:0007059//chromosome segregation;GO:0051301//cell division
414	MSTRG.3095.1	Os01g0766400	-	Conserved hypothetical protein	-	-	-	-	GO:0000940//condensed chromosome outer kinetochore;GO:0005876//spindle microtubule	GO:0008017//microtubule binding	GO:0000278//mitotic cell cycle;GO:0007059//chromosome segregation;GO:0051301//cell division
415	MSTRG.3099.3	Os01g0766900	OsCslC1	Hypothetical protein	-	-	-	-	GO:0016020//membrane;GO:0016021//integral component of membrane	-	-
415	MSTRG.3099.3	Os01g0766966	-	Hypothetical gene	-	-	-	-	-	-	-
415	MSTRG.3099.3	MSTRG.3100	CRWN4	protein CROWDED NUCLEI 4 [Oryza sativa Japonica Group]	-	-	-	-	GO:0009536//plastid;GO:0031981//nuclear lumen	GO:0004084//branched-chain-amino-acid transaminase activity	GO:0006796//phosphate-containing compound metabolic process;GO:0009081//branched-chain amino acid metabolic process;GO:0009404//toxin metabolic process;GO:0016570//histone modification;GO:0035194//posttranscriptional gene silencing by RNA;GO:0070918//production of small RNA involved in gene silencing by RNA;GO:1901605//alpha-amino acid metabolic process
415	MSTRG.3099.3	Os01g0767100	OsProCP1	Similar to Lysosomal Pro-X carboxypeptidase	-	-	-	-	GO:0005773//vacuole;GO:0009507//chloroplast	GO:0004180//carboxypeptidase activity;GO:0008236//serine-type peptidase activity;GO:0008239//dipeptidyl-peptidase activity	GO:0006508//proteolysis
416	MSTRG.3119.1	Os01g0770200	TYDC	Aromatic L-amino acid decarboxylase (AADC), Conversion of tyrosine into tyramin	-	-	-	-	-	GO:0003824//catalytic activity;GO:0004837//tyrosine decarboxylase activity;GO:0016829//lyase activity;GO:0016831//carboxy-lyase activity;GO:0030170//pyridoxal phosphate binding	GO:0006520//cellular amino acid metabolic process;GO:0019752//carboxylic acid metabolic process;GO:1901695//tyramine biosynthetic process
416	MSTRG.3119.1	Os01g0770100	-	O-acyltransferase, WSD1, N-terminal domain containing protein	-	-	-	-	GO:0005886//plasma membrane	GO:0004144//diacylglycerol O-acyltransferase activity;GO:0047196//long-chain-alcohol O-fatty-acyltransferase activity	GO:0019432//triglyceride biosynthetic process;GO:0045017//glycerolipid biosynthetic process
417	MSTRG.3124.1	Os01g0770400	OsFbox040	Cyclin-like F-box domain containing protein	-	-	-	-	-	GO:0005515//protein binding	-
417	MSTRG.3124.1	Os01g0770500	OsABCI6	Similar to ABC transporter ATP-binding protein	-	-	-	-	GO:0009941//chloroplast envelope	GO:0000166//nucleotide binding;GO:0005524//ATP binding;GO:0016887//ATPase activity	-
417	MSTRG.3124.1	Os01g0770700	COPT1	Similar to Copper transporter 1	-	-	-	-	GO:0005623//cell;GO:0005886//plasma membrane;GO:0005887//integral component of plasma membrane;GO:0016020//membrane;GO:0016021//integral component of membrane	GO:0005375//copper ion transmembrane transporter activity;GO:0005515//protein binding;GO:0043621//protein self-association;GO:0051119//sugar transmembrane transporter activity	GO:0006811//ion transport;GO:0006825//copper ion transport;GO:0006878//cellular copper ion homeostasis;GO:0006952//defense response;GO:0034219//carbohydrate transmembrane transport;GO:0035434//copper ion transmembrane transport
417	MSTRG.3124.1	Os01g0770800	COPT2	Ctr copper transporter family protein	-	-	-	-	GO:0005623//cell;GO:0005886//plasma membrane;GO:0016020//membrane;GO:0016021//integral component of membrane	GO:0005375//copper ion transmembrane transporter activity	GO:0006811//ion transport;GO:0006825//copper ion transport;GO:0006878//cellular copper ion homeostasis;GO:0035434//copper ion transmembrane transport
418	MSTRG.3129.1	Os01g0771000	-	Protein of unknown function DUF567 family protein	-	-	-	-	-	-	-
418	MSTRG.3129.1	Os01g0771100	-	Mitochondrial glycoprotein family protein	-	-	-	-	GO:0005739//mitochondrion;GO:0005759//mitochondrial matrix	-	-
418	MSTRG.3129.1	Os01g0771300	-	Hypothetical protein	-	-	-	-	-	-	-
418	MSTRG.3129.1	Os01g0771350	-	Hypothetical gene	-	-	-	-	GO:0016020//membrane;GO:0016021//integral component of membrane	-	-
418	MSTRG.3129.1	Os01g0771400	OsM2	Similar to CM0545.290.nc protein	-	-	-	-	GO:0005829//cytosol	GO:0004197//cysteine-type endopeptidase activity;GO:0004843//thiol-dependent ubiquitin-specific protease activity;GO:0005515//protein binding;GO:0036459//thiol-dependent ubiquitinyl hydrolase activity	GO:0006511//ubiquitin-dependent protein catabolic process;GO:0016579//protein deubiquitination;GO:0031647//regulation of protein stability
419	MSTRG.3152.1	Os01g0775100	-	Plus-3 domain containing protein	-	-	-	-	GO:0016593//Cdc73/Paf1 complex	GO:0003677//DNA binding;GO:1990269//RNA polymerase II C-terminal domain phosphoserine binding	GO:0006368//transcription elongation from RNA polymerase II promoter;GO:0016570//histone modification
419	MSTRG.3152.1	Os01g0775150	-	Non-protein coding transcript	-	-	-	-	-	-	-
419	MSTRG.3152.1	Os01g0775300	OsM1	MATH domain containing protein	-	-	-	-	-	GO:0005515//protein binding	-
419	MSTRG.3152.1	Os01g0775350	-	Hypothetical protein	-	-	-	-	-	-	-
420	MSTRG.3158.1	Os01g0776300	-	Protein of unknown function DUF26 domain containing protein	-	-	-	-	GO:0016020//membrane;GO:0016021//integral component of membrane	-	-
420	MSTRG.3158.1	Os01g0776400	OsWD40-25	Similar to predicted protein	-	-	-	-	-	GO:0005515//protein binding	-
420	MSTRG.3158.1	Os01g0776500	-	Peptidase cysteine/serine, trypsin-like domain containing protein	-	-	-	-	-	-	-
421	MSTRG.3163.1	Os01g0776400	OsWD40-25	Similar to predicted protein	-	-	-	-	-	GO:0005515//protein binding	-
421	MSTRG.3163.1	Os01g0776500	-	Peptidase cysteine/serine, trypsin-like domain containing protein	-	-	-	-	-	-	-
421	MSTRG.3163.1	Os01g0776700	-	Similar to predicted protein	-	-	-	-	GO:0009941//chloroplast envelope	-	-
421	MSTRG.3163.1	Os01g0776800	-	Domain of unknown function DUF1618 domain containing protein	-	-	-	-	GO:0016020//membrane;GO:0016021//integral component of membrane	-	-
422	MSTRG.3167.1	Os01g0776700	-	Similar to predicted protein	-	-	-	-	GO:0009941//chloroplast envelope	-	-
422	MSTRG.3167.1	Os01g0776800	-	Domain of unknown function DUF1618 domain containing protein	-	-	-	-	GO:0016020//membrane;GO:0016021//integral component of membrane	-	-
422	MSTRG.3167.1	Os01g0777000	-	Vacuolar protein sorting-associated protein 51 domain containing protein	-	-	-	-	GO:0005794//Golgi apparatus;GO:0005829//cytosol;GO:0017119//Golgi transport complex	-	GO:0006891//intra-Golgi vesicle-mediated transport
423	MSTRG.3171.1	Os01g0777400	-	Conserved hypothetical protein	-	-	-	-	-	-	-
423	MSTRG.3171.1	Os01g0777700	-	Similar to acid phosphatase/ oxidoreductase/ transition metal ion binding	Environmental Information Processing	Signal transduction	ko04070//Phosphatidylinositol signaling system	K13024	GO:0005737//cytoplasm;GO:0005829//cytosol	GO:0000166//nucleotide binding;GO:0000828//inositol hexakisphosphate kinase activity;GO:0000829//inositol heptakisphosphate kinase activity;GO:0000832//inositol hexakisphosphate 5-kinase activity;GO:0005524//ATP binding;GO:0016301//kinase activity;GO:0016740//transferase activity;GO:0033857//diphosphoinositol-pentakisphosphate kinase activity;GO:0052723//inositol hexakisphosphate 1-kinase activit…	GO:0006020//inositol metabolic process;GO:0016310//phosphorylation;GO:0032958//inositol phosphate biosynthetic process
423	MSTRG.3171.1	Os01g0777300	OsEXO1	DNA repair protein (XPGC)/yeast Rad family protein	Genetic Information Processing	Replication and repair	ko03430//Mismatch repair	K10746	GO:0005634//nucleus	GO:0003677//DNA binding;GO:0003824//catalytic activity;GO:0004518//nuclease activity;GO:0004519//endonuclease activity;GO:0004527//exonuclease activity;GO:0016787//hydrolase activity;GO:0016788//hydrolase activity, acting on ester bonds;GO:0017108//5'-flap endonuclease activity;GO:0035312//5'-3' exodeoxyribonuclease activity;GO:0046872//metal ion binding;GO:0048256//flap endonuclease activity	GO:0006281//DNA repair;GO:0006974//cellular response to DNA damage stimulus;GO:0090305//nucleic acid phosphodiester bond hydrolysis
424	MSTRG.3186.5	Os01g0779300	-	Concanavalin A-like lectin/glucanase, subgroup domain containing protein	-	-	-	-	GO:0005886//plasma membrane;GO:0016020//membrane;GO:0016021//integral component of membrane	GO:0004672//protein kinase activity;GO:0004675//transmembrane receptor protein serine/threonine kinase activity;GO:0005524//ATP binding;GO:0030246//carbohydrate binding	GO:0002229//defense response to oomycetes;GO:0006468//protein phosphorylation;GO:0006952//defense response;GO:0007178//transmembrane receptor protein serine/threonine kinase signaling pathway;GO:0042742//defense response to bacterium
425	MSTRG.3211.1	Os01g0783600	OsISC22	Similar to Frataxin	Metabolism	Metabolism of cofactors and vitamins	ko00860//Porphyrin and chlorophyll metabolism	K19054	GO:0005623//cell;GO:0005739//mitochondrion;GO:0009507//chloroplast	GO:0004322//ferroxidase activity;GO:0008198//ferrous iron binding;GO:0008199//ferric iron binding;GO:0034986//iron chaperone activity;GO:0051537//2 iron, 2 sulfur cluster binding	GO:0006879//cellular iron ion homeostasis;GO:0006979//response to oxidative stress;GO:0007005//mitochondrion organization;GO:0009060//aerobic respiration;GO:0009793//embryo development ending in seed dormancy;GO:0016226//iron-sulfur cluster assembly;GO:0018283//iron incorporation into metallo-sulfur cluster;GO:0042542//response to hydrogen peroxide;GO:0055114//oxidation-reduction process;GO:19033…
425	MSTRG.3211.1	Os01g0783700	-	Similar to EF-hand Ca2+-binding protein CCD1	-	-	-	-	-	GO:0005509//calcium ion binding	-
425	MSTRG.3211.1	Os01g0783851	-	Hypothetical protein	-	-	-	-	-	-	-
425	MSTRG.3211.1	MSTRG.3212	SD11	G-type lectin S-receptor-like serine/threonine-protein kinase At1g11330 isoform X3 [Oryza sativa Japonica Group]	-	-	-	-	GO:0005911//cell-cell junction	GO:0004672//protein kinase activity;GO:0032550//purine ribonucleoside binding;GO:0044389//ubiquitin-like protein ligase binding	GO:0006464//cellular protein modification process;GO:0016310//phosphorylation
425	MSTRG.3211.1	Os01g0784000	-	Similar to OSIGBa0117N13.1 protein	-	-	-	-	-	-	-
425	MSTRG.3211.1	Os01g0784200	-	Serine/threonine protein kinase-related domain containing protein	-	-	-	-	GO:0005886//plasma membrane;GO:0016021//integral component of membrane	GO:0000166//nucleotide binding;GO:0004672//protein kinase activity;GO:0004674//protein serine/threonine kinase activity;GO:0005524//ATP binding;GO:0016301//kinase activity;GO:0016740//transferase activity	GO:0006468//protein phosphorylation;GO:0016310//phosphorylation;GO:0048544//recognition of pollen
425	MSTRG.3211.1	Os01g0784101	-	Hypothetical protein	-	-	-	-	-	-	-
425	MSTRG.3211.1	Os01g0783800	-	Serine/threonine protein kinase-related domain containing protein	-	-	-	-	GO:0005886//plasma membrane;GO:0016021//integral component of membrane	GO:0000166//nucleotide binding;GO:0004672//protein kinase activity;GO:0004674//protein serine/threonine kinase activity;GO:0005524//ATP binding;GO:0016301//kinase activity;GO:0016740//transferase activity	GO:0006468//protein phosphorylation;GO:0016310//phosphorylation;GO:0048544//recognition of pollen
426	MSTRG.3214.1	Os01g0783851	-	Hypothetical protein	-	-	-	-	-	-	-
426	MSTRG.3214.1	MSTRG.3212	SD11	G-type lectin S-receptor-like serine/threonine-protein kinase At1g11330 isoform X3 [Oryza sativa Japonica Group]	-	-	-	-	GO:0005911//cell-cell junction	GO:0004672//protein kinase activity;GO:0032550//purine ribonucleoside binding;GO:0044389//ubiquitin-like protein ligase binding	GO:0006464//cellular protein modification process;GO:0016310//phosphorylation
426	MSTRG.3214.1	Os01g0784000	-	Similar to OSIGBa0117N13.1 protein	-	-	-	-	-	-	-
426	MSTRG.3214.1	Os01g0784200	-	Serine/threonine protein kinase-related domain containing protein	-	-	-	-	GO:0005886//plasma membrane;GO:0016021//integral component of membrane	GO:0000166//nucleotide binding;GO:0004672//protein kinase activity;GO:0004674//protein serine/threonine kinase activity;GO:0005524//ATP binding;GO:0016301//kinase activity;GO:0016740//transferase activity	GO:0006468//protein phosphorylation;GO:0016310//phosphorylation;GO:0048544//recognition of pollen
426	MSTRG.3214.1	Os01g0784101	-	Hypothetical protein	-	-	-	-	-	-	-
426	MSTRG.3214.1	Os01g0783800	-	Serine/threonine protein kinase-related domain containing protein	-	-	-	-	GO:0005886//plasma membrane;GO:0016021//integral component of membrane	GO:0000166//nucleotide binding;GO:0004672//protein kinase activity;GO:0004674//protein serine/threonine kinase activity;GO:0005524//ATP binding;GO:0016301//kinase activity;GO:0016740//transferase activity	GO:0006468//protein phosphorylation;GO:0016310//phosphorylation;GO:0048544//recognition of pollen
427	MSTRG.3219.2	Os01g0784450	-	Hypothetical protein	-	-	-	-	-	-	-
427	MSTRG.3219.2	Os01g0784700	-	Serine/threonine protein kinase-related domain containing protein	-	-	-	-	GO:0005886//plasma membrane;GO:0016021//integral component of membrane	GO:0000166//nucleotide binding;GO:0004672//protein kinase activity;GO:0004674//protein serine/threonine kinase activity;GO:0005524//ATP binding;GO:0016301//kinase activity;GO:0016740//transferase activity	GO:0006468//protein phosphorylation;GO:0016310//phosphorylation;GO:0048544//recognition of pollen
427	MSTRG.3219.2	Os01g0784725	-	Hypothetical protein	-	-	-	-	-	-	-
427	MSTRG.3219.2	Os01g0784500	OsRLCK44	Conserved hypothetical protein	-	-	-	-	GO:0016020//membrane;GO:0016021//integral component of membrane	-	-
428	ENSRNA049471700-T1	Os01g0791033	-	Similar to ribulose-1,5-bisphosphate carboxylase/oxygenase large subunit	Metabolism;Metabolism;Metabolism;Metabolism;Metabolism	Global and overview maps;Global and overview maps;Global and overview maps;Energy metabolism;Carbohydrate metabolism	ko01100//Metabolic pathways;ko01110//Biosynthesis of secondary metabolites;ko01200//Carbon metabolism;ko00710//Carbon fixation in photosynthetic organisms;ko00630//Glyoxylate and dicarboxylate metabolism	K01601;K01601;K01601;K01601;K01601	-	GO:0000287//magnesium ion binding	-
428	ENSRNA049471700-T1	MSTRG.3260	atpB	PREDICTED: ATP synthase subunit beta, chloroplastic-like [Gossypium hirsutum]	Metabolism;Metabolism;Metabolism	Global and overview maps;Energy metabolism;Energy metabolism	ko01100//Metabolic pathways;ko00190//Oxidative phosphorylation;ko00195//Photosynthesis	K02112;K02112;K02112	GO:0019866//organelle inner membrane;GO:0033178//proton-transporting two-sector ATPase complex, catalytic domain;GO:0044434//chloroplast part;GO:0044455//mitochondrial membrane part	GO:0019829//cation-transporting ATPase activity;GO:0032550//purine ribonucleoside binding	GO:0006754//ATP biosynthetic process;GO:0015988//energy coupled proton transmembrane transport, against electrochemical gradient
429	ENSRNA049471723-T1	Os01g0791033	-	Similar to ribulose-1,5-bisphosphate carboxylase/oxygenase large subunit	Metabolism;Metabolism;Metabolism;Metabolism;Metabolism	Global and overview maps;Global and overview maps;Global and overview maps;Energy metabolism;Carbohydrate metabolism	ko01100//Metabolic pathways;ko01110//Biosynthesis of secondary metabolites;ko01200//Carbon metabolism;ko00710//Carbon fixation in photosynthetic organisms;ko00630//Glyoxylate and dicarboxylate metabolism	K01601;K01601;K01601;K01601;K01601	-	GO:0000287//magnesium ion binding	-
429	ENSRNA049471723-T1	MSTRG.3260	atpB	PREDICTED: ATP synthase subunit beta, chloroplastic-like [Gossypium hirsutum]	Metabolism;Metabolism;Metabolism	Global and overview maps;Energy metabolism;Energy metabolism	ko01100//Metabolic pathways;ko00190//Oxidative phosphorylation;ko00195//Photosynthesis	K02112;K02112;K02112	GO:0019866//organelle inner membrane;GO:0033178//proton-transporting two-sector ATPase complex, catalytic domain;GO:0044434//chloroplast part;GO:0044455//mitochondrial membrane part	GO:0019829//cation-transporting ATPase activity;GO:0032550//purine ribonucleoside binding	GO:0006754//ATP biosynthetic process;GO:0015988//energy coupled proton transmembrane transport, against electrochemical gradient
430	MSTRG.3261.1	MSTRG.3262	rpoC2	RNA polymerase beta' subunit [Oryza longistaminata]	Genetic Information Processing	Transcription	ko03020//RNA polymerase	K03046	GO:0009536//plastid	GO:0003676//nucleic acid binding;GO:0034062//RNA polymerase activity	GO:0034645//cellular macromolecule biosynthetic process
431	MSTRG.3263.1	MSTRG.3262	rpoC2	RNA polymerase beta' subunit [Oryza longistaminata]	Genetic Information Processing	Transcription	ko03020//RNA polymerase	K03046	GO:0009536//plastid	GO:0003676//nucleic acid binding;GO:0034062//RNA polymerase activity	GO:0034645//cellular macromolecule biosynthetic process
432	MSTRG.3265.1	MSTRG.3270	ndhB1	NADH-plastoquinone oxidoreductase subunit 2 [Plukenetia volubilis]	Metabolism;Metabolism	Global and overview maps;Energy metabolism	ko01100//Metabolic pathways;ko00190//Oxidative phosphorylation	K05573;K05573	GO:0031224//intrinsic component of membrane;GO:0044434//chloroplast part	GO:0048037//cofactor binding;GO:0050136//NADH dehydrogenase (quinone) activity	GO:0022904//respiratory electron transport chain;GO:0051234//establishment of localization
433	MSTRG.3266.1	MSTRG.3270	ndhB1	NADH-plastoquinone oxidoreductase subunit 2 [Plukenetia volubilis]	Metabolism;Metabolism	Global and overview maps;Energy metabolism	ko01100//Metabolic pathways;ko00190//Oxidative phosphorylation	K05573;K05573	GO:0031224//intrinsic component of membrane;GO:0044434//chloroplast part	GO:0048037//cofactor binding;GO:0050136//NADH dehydrogenase (quinone) activity	GO:0022904//respiratory electron transport chain;GO:0051234//establishment of localization
433	MSTRG.3266.1	MSTRG.3271	--	Mitochondrion ORF162 [Oryza sativa Japonica Group]	-	-	-	-	GO:0043231//intracellular membrane-bounded organelle	-	-
434	MSTRG.3267.1	MSTRG.3270	ndhB1	NADH-plastoquinone oxidoreductase subunit 2 [Plukenetia volubilis]	Metabolism;Metabolism	Global and overview maps;Energy metabolism	ko01100//Metabolic pathways;ko00190//Oxidative phosphorylation	K05573;K05573	GO:0031224//intrinsic component of membrane;GO:0044434//chloroplast part	GO:0048037//cofactor binding;GO:0050136//NADH dehydrogenase (quinone) activity	GO:0022904//respiratory electron transport chain;GO:0051234//establishment of localization
434	MSTRG.3267.1	MSTRG.3271	--	Mitochondrion ORF162 [Oryza sativa Japonica Group]	-	-	-	-	GO:0043231//intracellular membrane-bounded organelle	-	-
435	ENSRNA049471715-T1	MSTRG.3270	ndhB1	NADH-plastoquinone oxidoreductase subunit 2 [Plukenetia volubilis]	Metabolism;Metabolism	Global and overview maps;Energy metabolism	ko01100//Metabolic pathways;ko00190//Oxidative phosphorylation	K05573;K05573	GO:0031224//intrinsic component of membrane;GO:0044434//chloroplast part	GO:0048037//cofactor binding;GO:0050136//NADH dehydrogenase (quinone) activity	GO:0022904//respiratory electron transport chain;GO:0051234//establishment of localization
435	ENSRNA049471715-T1	MSTRG.3271	--	Mitochondrion ORF162 [Oryza sativa Japonica Group]	-	-	-	-	GO:0043231//intracellular membrane-bounded organelle	-	-
436	MSTRG.3279.1	Os01g0793701	-	Hypothetical protein	-	-	-	-	-	-	-
436	MSTRG.3279.1	Os01g0793500	-	Similar to mRNA, clone: RTFL01-05-M08	-	-	-	-	-	-	-
436	MSTRG.3279.1	Os01g0793550	-	Hypothetical gene	-	-	-	-	-	-	-
436	MSTRG.3279.1	Os01g0793600	-	Conserved hypothetical protein	-	-	-	-	-	-	-
436	MSTRG.3279.1	Os01g0793800	-	Conserved hypothetical protein	-	-	-	-	-	-	-
436	MSTRG.3279.1	Os01g0793900	-	Conserved hypothetical protein	-	-	-	-	-	-	-
436	MSTRG.3279.1	Os01g0794100	-	Conserved hypothetical protein	-	-	-	-	-	-	-
437	MSTRG.3284.1	Os01g0794600	-	Hypothetical conserved gene	-	-	-	-	GO:0016020//membrane;GO:0016021//integral component of membrane	-	-
437	MSTRG.3284.1	Os01g0794650	-	Similar to Sodium/hydrogen exchanger family protein	-	-	-	-	GO:0012505//endomembrane system	-	GO:0006885//regulation of pH;GO:0015672//monovalent inorganic cation transport
437	MSTRG.3284.1	Os01g0794800	-	Similar to Subtilase	-	-	-	-	GO:0005615//extracellular space	GO:0004252//serine-type endopeptidase activity;GO:0008233//peptidase activity;GO:0008236//serine-type peptidase activity;GO:0016787//hydrolase activity	GO:0006508//proteolysis
437	MSTRG.3284.1	Os01g0794500	-	Translation initiation factor SUI1 domain containing protein	Genetic Information Processing	Translation	ko03013//RNA transport	K03113	-	GO:0003723//RNA binding;GO:0003743//translation initiation factor activity	GO:0006413//translational initiation
438	MSTRG.3292.1	Os01g0795050	-	Hypothetical gene	-	-	-	-	-	-	-
438	MSTRG.3292.1	Os01g0795100	OsSub7	Similar to Subtilase	-	-	-	-	GO:0005615//extracellular space	GO:0004252//serine-type endopeptidase activity;GO:0008233//peptidase activity;GO:0008236//serine-type peptidase activity;GO:0016787//hydrolase activity	GO:0006508//proteolysis
438	MSTRG.3292.1	Os01g0795300	-	Hypothetical protein	-	-	-	-	-	-	-
438	MSTRG.3292.1	Os01g0795400	Hwi2	Similar to Subtilase	-	-	-	-	GO:0005615//extracellular space	GO:0004252//serine-type endopeptidase activity	GO:0006508//proteolysis
439	MSTRG.3301.1	Os01g0795600	-	Conserved hypothetical protein	-	-	-	-	-	-	-
439	MSTRG.3301.1	Os01g0795700	-	Non-protein coding transcript	-	-	-	-	-	-	-
439	MSTRG.3301.1	MSTRG.3298	--	Os02g0474050 [Oryza sativa Japonica Group]	-	-	-	-	-	-	-
439	MSTRG.3301.1	MSTRG.3299	--	hypothetical protein DAI22_01g362400 [Oryza sativa Japonica Group]	-	-	-	-	-	-	-
439	MSTRG.3301.1	Os01g0795832	-	Conserved hypothetical protein	-	-	-	-	-	-	-
439	MSTRG.3301.1	Os01g0795900	-	Hypothetical protein	-	-	-	-	GO:0016020//membrane;GO:0016021//integral component of membrane	-	-
439	MSTRG.3301.1	Os01g0796000	-	Conserved hypothetical protein	-	-	-	-	-	-	-
440	MSTRG.3304.1	Os01g0795700	-	Non-protein coding transcript	-	-	-	-	-	-	-
440	MSTRG.3304.1	MSTRG.3298	--	Os02g0474050 [Oryza sativa Japonica Group]	-	-	-	-	-	-	-
440	MSTRG.3304.1	MSTRG.3299	--	hypothetical protein DAI22_01g362400 [Oryza sativa Japonica Group]	-	-	-	-	-	-	-
440	MSTRG.3304.1	Os01g0795766	-	Non-protein coding transcript	-	-	-	-	-	-	-
440	MSTRG.3304.1	Os01g0795832	-	Conserved hypothetical protein	-	-	-	-	-	-	-
440	MSTRG.3304.1	Os01g0795900	-	Hypothetical protein	-	-	-	-	GO:0016020//membrane;GO:0016021//integral component of membrane	-	-
441	MSTRG.3314.2	Os01g0797700	-	Non-protein coding transcript	-	-	-	-	-	-	-
441	MSTRG.3314.2	Os01g0797900	-	Hypothetical protein	-	-	-	-	-	-	-
442	MSTRG.3350.2	Os01g0801901	OsbZIP07	Similar to Transcription factor (Fragment)	-	-	-	-	-	GO:0003700//transcription factor activity, sequence-specific DNA binding	GO:0006355//regulation of transcription, DNA-templated
442	MSTRG.3350.2	Os01g0802000	OsRFPH2-12	Zinc finger, RING/FYVE/PHD-type domain containing protein	-	-	-	-	GO:0005737//cytoplasm	GO:0061630//ubiquitin protein ligase activity	GO:0016567//protein ubiquitination
442	MSTRG.3350.2	Os01g0802200	-	Conserved hypothetical protein	-	-	-	-	-	-	-
443	MSTRG.3360.1	Os01g0803300	-	Protein of unknown function DUF6, transmembrane domain containing protein	-	-	-	-	GO:0005886//plasma membrane;GO:0016020//membrane;GO:0016021//integral component of membrane	GO:0022857//transmembrane transporter activity	GO:0055085//transmembrane transport
444	MSTRG.3362.1	MSTRG.3361	CYP94A1	Os01g0803800, partial [Oryza sativa Japonica Group]	-	-	-	-	-	GO:0016491//oxidoreductase activity;GO:0046906//tetrapyrrole binding;GO:0046914//transition metal ion binding	GO:0044710//single-organism metabolic process
444	MSTRG.3362.1	Os01g0803900	-	Cytochrome P450 family protein	-	-	-	-	GO:0016020//membrane;GO:0016021//integral component of membrane	GO:0004497//monooxygenase activity;GO:0005506//iron ion binding;GO:0016491//oxidoreductase activity;GO:0016705//oxidoreductase activity, acting on paired donors, with incorporation or reduction of molecular oxygen;GO:0020037//heme binding;GO:0046872//metal ion binding	GO:0055114//oxidation-reduction process
445	MSTRG.3368.1	Os01g0804400	-	Cytochrome P450 family protein	-	-	-	-	GO:0016021//integral component of membrane	GO:0004497//monooxygenase activity;GO:0005506//iron ion binding;GO:0016491//oxidoreductase activity;GO:0016705//oxidoreductase activity, acting on paired donors, with incorporation or reduction of molecular oxygen;GO:0020037//heme binding;GO:0046872//metal ion binding	GO:0055114//oxidation-reduction process
446	MSTRG.3373.1	Os01g0804900	-	Similar to Cytochrome P450	-	-	-	-	-	GO:0004497//monooxygenase activity;GO:0005506//iron ion binding;GO:0016491//oxidoreductase activity;GO:0016705//oxidoreductase activity, acting on paired donors, with incorporation or reduction of molecular oxygen;GO:0020037//heme binding;GO:0046872//metal ion binding	GO:0055114//oxidation-reduction process
446	MSTRG.3373.1	Os01g0805000	-	50S ribosomal protein L34	Genetic Information Processing	Translation	ko03010//Ribosome	K02914	GO:0005762//mitochondrial large ribosomal subunit;GO:0005840//ribosome	GO:0003735//structural constituent of ribosome	GO:0006412//translation
446	MSTRG.3373.1	Os01g0805100	-	Conserved hypothetical protein	-	-	-	-	GO:0005794//Golgi apparatus	-	-
446	MSTRG.3373.1	Os01g0805300	PsbP	Mog1/PsbP, alpha/beta/alpha sandwich domain containing protein	-	-	-	-	GO:0009507//chloroplast;GO:0009523//photosystem II;GO:0009534//chloroplast thylakoid;GO:0009570//chloroplast stroma;GO:0009579//thylakoid;GO:0009654//photosystem II oxygen evolving complex;GO:0019898//extrinsic component of membrane;GO:0031977//thylakoid lumen	GO:0005509//calcium ion binding	GO:0015979//photosynthesis
446	MSTRG.3373.1	Os01g0805500	OsUGT87C1	Similar to indole-3-acetate beta-glucosyltransferase	-	-	-	-	GO:0043231//intracellular membrane-bounded organelle	GO:0008194//UDP-glycosyltransferase activity;GO:0016740//transferase activity;GO:0016757//transferase activity, transferring glycosyl groups;GO:0016758//transferase activity, transferring hexosyl groups;GO:0080043//quercetin 3-O-glucosyltransferase activity;GO:0080044//quercetin 7-O-glucosyltransferase activity	-
446	MSTRG.3373.1	Os01g0805400	OsEnS-18	UDP-glucuronosyl/UDP-glucosyltransferase family protein	-	-	-	-	GO:0043231//intracellular membrane-bounded organelle	GO:0008194//UDP-glycosyltransferase activity;GO:0016740//transferase activity;GO:0016757//transferase activity, transferring glycosyl groups;GO:0016758//transferase activity, transferring hexosyl groups;GO:0080043//quercetin 3-O-glucosyltransferase activity;GO:0080044//quercetin 7-O-glucosyltransferase activity	-
447	MSTRG.3389.1	Os01g0807266	-	Hypothetical gene	-	-	-	-	-	-	-
447	MSTRG.3389.1	Os01g0807532	-	Hypothetical conserved gene	-	-	-	-	-	-	-
448	MSTRG.3396.1	Os01g0809000	-	Hypothetical protein	-	-	-	-	-	-	-
448	MSTRG.3396.1	Os01g0809300	OsLRP	Leucine-rich repeat, N-terminal domain containing protein	Metabolism;Metabolism	Global and overview maps;Carbohydrate metabolism	ko01100//Metabolic pathways;ko00650//Butanoate metabolism	K00109;K00109	GO:0005768//endosome;GO:0005886//plasma membrane;GO:0016020//membrane;GO:0031901//early endosome membrane;GO:0031902//late endosome membrane	GO:0005515//protein binding	GO:0006952//defense response;GO:0009755//hormone-mediated signaling pathway
449	MSTRG.3397.1	Os01g0809000	-	Hypothetical protein	-	-	-	-	-	-	-
449	MSTRG.3397.1	Os01g0809300	OsLRP	Leucine-rich repeat, N-terminal domain containing protein	Metabolism;Metabolism	Global and overview maps;Carbohydrate metabolism	ko01100//Metabolic pathways;ko00650//Butanoate metabolism	K00109;K00109	GO:0005768//endosome;GO:0005886//plasma membrane;GO:0016020//membrane;GO:0031901//early endosome membrane;GO:0031902//late endosome membrane	GO:0005515//protein binding	GO:0006952//defense response;GO:0009755//hormone-mediated signaling pathway
450	MSTRG.3401.1	Os01g0810100	-	Ribonuclease III domain containing protein	-	-	-	-	GO:0005634//nucleus;GO:0009507//chloroplast;GO:0009536//plastid	GO:0003723//RNA binding;GO:0003725//double-stranded RNA binding;GO:0004525//ribonuclease III activity	GO:0006396//RNA processing;GO:0006397//mRNA processing;GO:0008380//RNA splicing;GO:0030422//production of siRNA involved in RNA interference;GO:0031053//primary miRNA processing;GO:0031054//pre-miRNA processing;GO:0090501//RNA phosphodiester bond hydrolysis;GO:0090502//RNA phosphodiester bond hydrolysis, endonucleolytic
450	MSTRG.3401.1	Os01g0810200	-	Cupin, RmlC-type domain containing protein	-	-	-	-	GO:0005768//endosome;GO:0005794//Golgi apparatus;GO:0005802//trans-Golgi network	-	-
450	MSTRG.3401.1	Os01g0809900	-	FAD dependent oxidoreductase domain containing protein	Metabolism;Metabolism	Global and overview maps;Carbohydrate metabolism	ko01100//Metabolic pathways;ko00650//Butanoate metabolism	K00109;K00109	GO:0005739//mitochondrion	GO:0003973//(S)-2-hydroxy-acid oxidase activity;GO:0016491//oxidoreductase activity;GO:0047545//2-hydroxyglutarate dehydrogenase activity;GO:0071949//FAD binding	GO:0055114//oxidation-reduction process
451	MSTRG.3403.1	Os01g0810000	-	Utp11 family protein	-	-	-	-	GO:0005634//nucleus;GO:0005730//nucleolus;GO:0032040//small-subunit processome	-	GO:0006364//rRNA processing;GO:0009561//megagametogenesis
451	MSTRG.3403.1	Os01g0810200	-	Cupin, RmlC-type domain containing protein	-	-	-	-	GO:0005768//endosome;GO:0005794//Golgi apparatus;GO:0005802//trans-Golgi network	-	-
451	MSTRG.3403.1	Os01g0809900	-	FAD dependent oxidoreductase domain containing protein	Metabolism;Metabolism	Global and overview maps;Carbohydrate metabolism	ko01100//Metabolic pathways;ko00650//Butanoate metabolism	K00109;K00109	GO:0005739//mitochondrion	GO:0003973//(S)-2-hydroxy-acid oxidase activity;GO:0016491//oxidoreductase activity;GO:0047545//2-hydroxyglutarate dehydrogenase activity;GO:0071949//FAD binding	GO:0055114//oxidation-reduction process
451	MSTRG.3403.1	Os01g0810300	CaM61	Similar to Calmodulin-like protein	Organismal Systems;Environmental Information Processing;Environmental Information Processing	Environmental adaptation;Signal transduction;Signal transduction	ko04626//Plant-pathogen interaction;ko04016//MAPK signaling pathway - plant;ko04070//Phosphatidylinositol signaling system	K02183;K02183;K02183	GO:0005634//nucleus;GO:0016020//membrane	GO:0005509//calcium ion binding;GO:0046872//metal ion binding	GO:0019722//calcium-mediated signaling
452	MSTRG.3405.1	Os01g0810000	-	Utp11 family protein	-	-	-	-	GO:0005634//nucleus;GO:0005730//nucleolus;GO:0032040//small-subunit processome	-	GO:0006364//rRNA processing;GO:0009561//megagametogenesis
452	MSTRG.3405.1	Os01g0810100	-	Ribonuclease III domain containing protein	-	-	-	-	GO:0005634//nucleus;GO:0009507//chloroplast;GO:0009536//plastid	GO:0003723//RNA binding;GO:0003725//double-stranded RNA binding;GO:0004525//ribonuclease III activity	GO:0006396//RNA processing;GO:0006397//mRNA processing;GO:0008380//RNA splicing;GO:0030422//production of siRNA involved in RNA interference;GO:0031053//primary miRNA processing;GO:0031054//pre-miRNA processing;GO:0090501//RNA phosphodiester bond hydrolysis;GO:0090502//RNA phosphodiester bond hydrolysis, endonucleolytic
452	MSTRG.3405.1	Os01g0810401	-	Non-protein coding transcript	-	-	-	-	-	-	-
452	MSTRG.3405.1	Os01g0809900	-	FAD dependent oxidoreductase domain containing protein	Metabolism;Metabolism	Global and overview maps;Carbohydrate metabolism	ko01100//Metabolic pathways;ko00650//Butanoate metabolism	K00109;K00109	GO:0005739//mitochondrion	GO:0003973//(S)-2-hydroxy-acid oxidase activity;GO:0016491//oxidoreductase activity;GO:0047545//2-hydroxyglutarate dehydrogenase activity;GO:0071949//FAD binding	GO:0055114//oxidation-reduction process
452	MSTRG.3405.1	Os01g0810300	CaM61	Similar to Calmodulin-like protein	Organismal Systems;Environmental Information Processing;Environmental Information Processing	Environmental adaptation;Signal transduction;Signal transduction	ko04626//Plant-pathogen interaction;ko04016//MAPK signaling pathway - plant;ko04070//Phosphatidylinositol signaling system	K02183;K02183;K02183	GO:0005634//nucleus;GO:0016020//membrane	GO:0005509//calcium ion binding;GO:0046872//metal ion binding	GO:0019722//calcium-mediated signaling
453	MSTRG.3407.1	Os01g0810200	-	Cupin, RmlC-type domain containing protein	-	-	-	-	GO:0005768//endosome;GO:0005794//Golgi apparatus;GO:0005802//trans-Golgi network	-	-
453	MSTRG.3407.1	Os01g0810800	-	Hypothetical conserved gene	-	-	-	-	GO:0016020//membrane;GO:0016021//integral component of membrane	GO:0004672//protein kinase activity;GO:0005515//protein binding;GO:0005524//ATP binding	GO:0006468//protein phosphorylation
453	MSTRG.3407.1	Os01g0810300	CaM61	Similar to Calmodulin-like protein	Organismal Systems;Environmental Information Processing;Environmental Information Processing	Environmental adaptation;Signal transduction;Signal transduction	ko04626//Plant-pathogen interaction;ko04016//MAPK signaling pathway - plant;ko04070//Phosphatidylinositol signaling system	K02183;K02183;K02183	GO:0005634//nucleus;GO:0016020//membrane	GO:0005509//calcium ion binding;GO:0046872//metal ion binding	GO:0019722//calcium-mediated signaling
453	MSTRG.3407.1	Os01g0810700	-	Hypothetical gene	-	-	-	-	-	-	-
453	MSTRG.3407.1	Os01g0810600	OsRLCK46	Similar to cDNA, clone: J100063K14, full insert sequence	-	-	-	-	-	GO:0004672//protein kinase activity;GO:0005524//ATP binding	GO:0006468//protein phosphorylation
454	MSTRG.3411.1	Os01g0810401	-	Non-protein coding transcript	-	-	-	-	-	-	-
454	MSTRG.3411.1	Os01g0810500	-	Hypothetical conserved gene	-	-	-	-	-	GO:0004672//protein kinase activity;GO:0005515//protein binding;GO:0005524//ATP binding	GO:0006468//protein phosphorylation
454	MSTRG.3411.1	Os01g0810800	-	Hypothetical conserved gene	-	-	-	-	GO:0016020//membrane;GO:0016021//integral component of membrane	GO:0004672//protein kinase activity;GO:0005515//protein binding;GO:0005524//ATP binding	GO:0006468//protein phosphorylation
454	MSTRG.3411.1	Os01g0810833	-	Non-protein coding transcript	-	-	-	-	-	-	-
455	MSTRG.3412.1	Os01g0810401	-	Non-protein coding transcript	-	-	-	-	-	-	-
455	MSTRG.3412.1	Os01g0810500	-	Hypothetical conserved gene	-	-	-	-	-	GO:0004672//protein kinase activity;GO:0005515//protein binding;GO:0005524//ATP binding	GO:0006468//protein phosphorylation
455	MSTRG.3412.1	Os01g0810800	-	Hypothetical conserved gene	-	-	-	-	GO:0016020//membrane;GO:0016021//integral component of membrane	GO:0004672//protein kinase activity;GO:0005515//protein binding;GO:0005524//ATP binding	GO:0006468//protein phosphorylation
455	MSTRG.3412.1	Os01g0810833	-	Non-protein coding transcript	-	-	-	-	-	-	-
456	MSTRG.3414.1	Os01g0810500	-	Hypothetical conserved gene	-	-	-	-	-	GO:0004672//protein kinase activity;GO:0005515//protein binding;GO:0005524//ATP binding	GO:0006468//protein phosphorylation
456	MSTRG.3414.1	Os01g0810833	-	Non-protein coding transcript	-	-	-	-	-	-	-
456	MSTRG.3414.1	Os01g0810700	-	Hypothetical gene	-	-	-	-	-	-	-
456	MSTRG.3414.1	Os01g0810600	OsRLCK46	Similar to cDNA, clone: J100063K14, full insert sequence	-	-	-	-	-	GO:0004672//protein kinase activity;GO:0005524//ATP binding	GO:0006468//protein phosphorylation
457	MSTRG.3420.5	Os01g0812050	-	Conserved hypothetical protein	-	-	-	-	-	-	-
458	MSTRG.3426.1	Os01g0812800	-	Ribosomal protein L30e domain containing protein	Genetic Information Processing	Translation	ko03010//Ribosome	K02908	GO:0022625//cytosolic large ribosomal subunit	GO:0003723//RNA binding;GO:0003735//structural constituent of ribosome	GO:0006412//translation
458	MSTRG.3426.1	Os01g0812900	-	Similar to alphavirus core protein family	-	-	-	-	GO:0016021//integral component of membrane	-	-
458	MSTRG.3426.1	Os01g0813100	HBF2	bZIP transcription factor, Modulation of the floral transition, Floral represso	Environmental Information Processing	Signal transduction	ko04075//Plant hormone signal transduction	K14432	-	GO:0003700//transcription factor activity, sequence-specific DNA binding	GO:0006355//regulation of transcription, DNA-templated
458	MSTRG.3426.1	Os01g0812850	-	Conserved hypothetical protein	-	-	-	-	GO:0016021//integral component of membrane	-	-
459	MSTRG.3450.1	Os01g0816700	-	Similar to L-ascorbate oxidase homolog precursor (EC 1.10.3.3) (Ascorbase)	Metabolism;Metabolism	Global and overview maps;Carbohydrate metabolism	ko01100//Metabolic pathways;ko00053//Ascorbate and aldarate metabolism	K00423;K00423	GO:0005886//plasma membrane;GO:0009505//plant-type cell wall;GO:0009506//plasmodesma	GO:0004322//ferroxidase activity;GO:0005507//copper ion binding;GO:0016491//oxidoreductase activity;GO:0016722//oxidoreductase activity, oxidizing metal ions	GO:0006826//iron ion transport;GO:0055072//iron ion homeostasis;GO:0055114//oxidation-reduction process
459	MSTRG.3450.1	Os01g0816850	-	Hypothetical protein	-	-	-	-	-	-	-
459	MSTRG.3450.1	Os01g0816500	-	Similar to microtubule organization protein	-	-	-	-	GO:0000776//kinetochore;GO:0000922//spindle pole;GO:0005813//centrosome;GO:0035371//microtubule plus-end	GO:0008017//microtubule binding;GO:0051010//microtubule plus-end binding	GO:0007051//spindle organization;GO:0007052//mitotic spindle organization;GO:0030951//establishment or maintenance of microtubule cytoskeleton polarity;GO:0046785//microtubule polymerization;GO:0051298//centrosome duplication
459	MSTRG.3450.1	Os01g0816525	-	Non-protein coding transcript	-	-	-	-	-	-	-
460	MSTRG.3452.1	Os01g0817100	-	TRAM, LAG1 and CLN8 homology domain containing protein	-	-	-	-	GO:0016020//membrane;GO:0016021//integral component of membrane	-	-
461	MSTRG.3468.1	Os01g0819000	-	Similar to transposon protein CACTA, En/Spm sub-class	-	-	-	-	-	-	-
461	MSTRG.3468.1	Os01g0819100	-	Similar to predicted protein	-	-	-	-	-	GO:0004672//protein kinase activity;GO:0005524//ATP binding	GO:0006468//protein phosphorylation
461	MSTRG.3468.1	Os01g0819200	-	Similar to calcium lipid binding protein-like	-	-	-	-	GO:0005783//endoplasmic reticulum;GO:0016020//membrane;GO:0016021//integral component of membrane	GO:0008289//lipid binding	GO:0006869//lipid transport
461	MSTRG.3468.1	Os01g0819233	-	Hypothetical gene	-	-	-	-	-	-	-
461	MSTRG.3468.1	Os01g0819266	-	Non-protein coding transcript	-	-	-	-	-	-	-
462	MSTRG.3481.1	Os01g0820750	-	Non-protein coding transcript	-	-	-	-	-	-	-
462	MSTRG.3481.1	Os01g0820800	-	Conserved hypothetical protein	-	-	-	-	-	-	-
463	MSTRG.3506.1	Os01g0825332	-	Similar to Splicing coactivator subunit-like protein	-	-	-	-	-	-	-
463	MSTRG.3506.1	Os01g0825500	-	Nodulin-like domain containing protein	-	-	-	-	GO:0016020//membrane;GO:0016021//integral component of membrane	-	-
464	MSTRG.3507.1	Os01g0825500	-	Nodulin-like domain containing protein	-	-	-	-	GO:0016020//membrane;GO:0016021//integral component of membrane	-	-
465	MSTRG.3512.1	Os01g0826000	OsATX	Heavy metal transport/detoxification protein domain containing protein	-	-	-	-	-	GO:0046872//metal ion binding	GO:0030001//metal ion transport
465	MSTRG.3512.1	Os01g0825800	OsATL7	Amino acid transporter, transmembrane domain containing protein	-	-	-	-	GO:0016020//membrane;GO:0016021//integral component of membrane	GO:0015171//amino acid transmembrane transporter activity	GO:0003333//amino acid transmembrane transport
466	MSTRG.3536.1	Os01g0830000	OsABCI5	Similar to Plastid sufB (Fragment)	-	-	-	-	-	-	GO:0016226//iron-sulfur cluster assembly
466	MSTRG.3536.1	Os01g0830100	-	Pyridine nucleotide-disulphide oxidoreductase, NAD-binding region domain containing protein	-	-	-	-	-	GO:0016491//oxidoreductase activity	GO:0055114//oxidation-reduction process
466	MSTRG.3536.1	Os01g0830300	-	Non-protein coding transcript	-	-	-	-	-	-	-
466	MSTRG.3536.1	Os01g0830500	Os2OG-Fe	2OG-Fe(II) oxygenase domain containing protein	-	-	-	-	-	GO:0051213//dioxygenase activity	GO:0055114//oxidation-reduction process
467	MSTRG.3554.1	Os01g0832900	OsSTK1	Similar to ATP binding protein	-	-	-	-	-	GO:0004672//protein kinase activity;GO:0004674//protein serine/threonine kinase activity;GO:0005524//ATP binding	GO:0006468//protein phosphorylation;GO:0018105//peptidyl-serine phosphorylation;GO:0018107//peptidyl-threonine phosphorylation
467	MSTRG.3554.1	Os01g0833000	-	Pentatricopeptide repeat domain containing protein	-	-	-	-	GO:0005739//mitochondrion	GO:0005515//protein binding	-
468	MSTRG.3564.1	Os01g0834400	HAP3A	Similar to HAP3	-	-	-	-	GO:0005634//nucleus	GO:0043565//sequence-specific DNA binding;GO:0046982//protein heterodimerization activity	GO:0006355//regulation of transcription, DNA-templated
468	MSTRG.3564.1	Os01g0834200	-	Similar to T-cell immune regulator 1 transcript variant 3 (Fragment)	Metabolism;Metabolism;Cellular Processes	Global and overview maps;Energy metabolism;Transport and catabolism	ko01100//Metabolic pathways;ko00190//Oxidative phosphorylation;ko04145//Phagosome	K02154;K02154;K02154	GO:0000220//vacuolar proton-transporting V-type ATPase, V0 domain;GO:0005623//cell;GO:0005768//endosome;GO:0005773//vacuole;GO:0005794//Golgi apparatus;GO:0005802//trans-Golgi network;GO:0012510//trans-Golgi network transport vesicle membrane;GO:0016020//membrane;GO:0016021//integral component of membrane;GO:0016471//vacuolar proton-transporting V-type ATPase complex;GO:0033179//proton-transporti…	GO:0015078//hydrogen ion transmembrane transporter activity;GO:0046961//proton-transporting ATPase activity, rotational mechanism;GO:0051117//ATPase binding	GO:0006811//ion transport;GO:0007035//vacuolar acidification;GO:0015991//ATP hydrolysis coupled proton transport;GO:0070070//proton-transporting V-type ATPase complex assembly;GO:1902600//hydrogen ion transmembrane transport
469	MSTRG.3570.2	Os01g0834900	-	Hypothetical conserved gene	-	-	-	-	-	-	-
469	MSTRG.3570.2	Os01g0835166	-	Non-protein coding transcript	-	-	-	-	-	-	-
469	MSTRG.3570.2	Os01g0835332	-	Non-protein coding transcript	-	-	-	-	-	-	-
470	MSTRG.3574.1	Os01g0835651	-	Non-protein coding transcript	-	-	-	-	-	-	-
471	MSTRG.3573.5	Os01g0835651	-	Non-protein coding transcript	-	-	-	-	-	-	-
471	MSTRG.3573.5	Os01g0835700	OsCCT01	CCT domain containing protein	-	-	-	-	GO:0005634//nucleus	GO:0005515//protein binding	GO:0009909//regulation of flower development
471	MSTRG.3573.5	Os01g0835500	rbohE	Similar to Respiratory burst oxidase protein	-	-	-	-	GO:0005886//plasma membrane;GO:0016020//membrane;GO:0016021//integral component of membrane	GO:0004601//peroxidase activity;GO:0005509//calcium ion binding;GO:0016174//NAD(P)H oxidase activity;GO:0016491//oxidoreductase activity;GO:0050664//oxidoreductase activity, acting on NAD(P)H, oxygen as acceptor	GO:0055114//oxidation-reduction process;GO:0098869//cellular oxidant detoxification
472	MSTRG.3573.6	Os01g0835651	-	Non-protein coding transcript	-	-	-	-	-	-	-
472	MSTRG.3573.6	Os01g0835700	OsCCT01	CCT domain containing protein	-	-	-	-	GO:0005634//nucleus	GO:0005515//protein binding	GO:0009909//regulation of flower development
472	MSTRG.3573.6	Os01g0835500	rbohE	Similar to Respiratory burst oxidase protein	-	-	-	-	GO:0005886//plasma membrane;GO:0016020//membrane;GO:0016021//integral component of membrane	GO:0004601//peroxidase activity;GO:0005509//calcium ion binding;GO:0016174//NAD(P)H oxidase activity;GO:0016491//oxidoreductase activity;GO:0050664//oxidoreductase activity, acting on NAD(P)H, oxygen as acceptor	GO:0055114//oxidation-reduction process;GO:0098869//cellular oxidant detoxification
473	MSTRG.3582.1	Os01g0836700	-	Hypothetical conserved gene	-	-	-	-	GO:0016020//membrane;GO:0016021//integral component of membrane	-	-
473	MSTRG.3582.1	Os01g0836800	-	Transmembrane receptor, eukaryota domain containing protein	-	-	-	-	GO:0016020//membrane;GO:0016021//integral component of membrane	-	-
473	MSTRG.3582.1	Os01g0836900	-	Conserved hypothetical protein	-	-	-	-	GO:0005886//plasma membrane	GO:0019210//kinase inhibitor activity	GO:0033673//negative regulation of kinase activity
473	MSTRG.3582.1	Os01g0837000	OsNPR4	Ankyrin repeat containing protein	-	-	-	-	-	GO:0005515//protein binding	-
473	MSTRG.3582.1	Os01g0837100	-	Similar to predicted protein	Metabolism;Metabolism	Global and overview maps;Carbohydrate metabolism	ko01100//Metabolic pathways;ko00040//Pentose and glucuronate interconversions	K01728;K01728	-	GO:0016829//lyase activity;GO:0030570//pectate lyase activity;GO:0046872//metal ion binding	GO:0045490//pectin catabolic process
474	MSTRG.3585.1	Os01g0836800	-	Transmembrane receptor, eukaryota domain containing protein	-	-	-	-	GO:0016020//membrane;GO:0016021//integral component of membrane	-	-
474	MSTRG.3585.1	Os01g0836900	-	Conserved hypothetical protein	-	-	-	-	GO:0005886//plasma membrane	GO:0019210//kinase inhibitor activity	GO:0033673//negative regulation of kinase activity
474	MSTRG.3585.1	Os01g0837000	OsNPR4	Ankyrin repeat containing protein	-	-	-	-	-	GO:0005515//protein binding	-
474	MSTRG.3585.1	Os01g0837100	-	Similar to predicted protein	Metabolism;Metabolism	Global and overview maps;Carbohydrate metabolism	ko01100//Metabolic pathways;ko00040//Pentose and glucuronate interconversions	K01728;K01728	-	GO:0016829//lyase activity;GO:0030570//pectate lyase activity;GO:0046872//metal ion binding	GO:0045490//pectin catabolic process
475	MSTRG.3590.1	Os01g0837000	OsNPR4	Ankyrin repeat containing protein	-	-	-	-	-	GO:0005515//protein binding	-
475	MSTRG.3590.1	Os01g0837100	-	Similar to predicted protein	Metabolism;Metabolism	Global and overview maps;Carbohydrate metabolism	ko01100//Metabolic pathways;ko00040//Pentose and glucuronate interconversions	K01728;K01728	-	GO:0016829//lyase activity;GO:0030570//pectate lyase activity;GO:0046872//metal ion binding	GO:0045490//pectin catabolic process
475	MSTRG.3590.1	Os01g0837200	-	Similar to esterase/lipase/thioesterase family protein	Metabolism;Metabolism	Global and overview maps;Lipid metabolism	ko01100//Metabolic pathways;ko00561//Glycerolipid metabolism	K01054;K01054	GO:0016020//membrane	GO:0016298//lipase activity	-
475	MSTRG.3590.1	Os01g0837500	OsRuvBL1a	Similar to Ruvbl1 protein	-	-	-	-	GO:0000812//Swr1 complex;GO:0005634//nucleus;GO:0031011//Ino80 complex;GO:0035267//NuA4 histone acetyltransferase complex;GO:0097255//R2TP complex	GO:0000166//nucleotide binding;GO:0003678//DNA helicase activity;GO:0004003//ATP-dependent DNA helicase activity;GO:0004386//helicase activity;GO:0005524//ATP binding;GO:0016787//hydrolase activity;GO:0043139//5'-3' DNA helicase activity;GO:0043141//ATP-dependent 5'-3' DNA helicase activity	GO:0000492//box C/D snoRNP assembly;GO:0006338//chromatin remodeling;GO:0006357//regulation of transcription from RNA polymerase II promoter;GO:0016573//histone acetylation;GO:0032508//DNA duplex unwinding
476	MSTRG.3594.1	Os01g0837500	OsRuvBL1a	Similar to Ruvbl1 protein	-	-	-	-	GO:0000812//Swr1 complex;GO:0005634//nucleus;GO:0031011//Ino80 complex;GO:0035267//NuA4 histone acetyltransferase complex;GO:0097255//R2TP complex	GO:0000166//nucleotide binding;GO:0003678//DNA helicase activity;GO:0004003//ATP-dependent DNA helicase activity;GO:0004386//helicase activity;GO:0005524//ATP binding;GO:0016787//hydrolase activity;GO:0043139//5'-3' DNA helicase activity;GO:0043141//ATP-dependent 5'-3' DNA helicase activity	GO:0000492//box C/D snoRNP assembly;GO:0006338//chromatin remodeling;GO:0006357//regulation of transcription from RNA polymerase II promoter;GO:0016573//histone acetylation;GO:0032508//DNA duplex unwinding
476	MSTRG.3594.1	Os01g0837600	-	Similar to plant-specific domain TIGR01589 family protein	-	-	-	-	-	-	-
476	MSTRG.3594.1	Os01g0837700	OsMTP11	Hypothetical genes	-	-	-	-	-	-	-
476	MSTRG.3594.1	Os01g0837800	OsMTP11	Metal tolerance protein, Manganese transporter, Mn-cation diffusion facilitator (CDF ), Mn and other heavy metal tolerance and homeostasi	-	-	-	-	GO:0005623//cell;GO:0005773//vacuole;GO:0005774//vacuolar membrane;GO:0005886//plasma membrane;GO:0016020//membrane;GO:0016021//integral component of membrane	GO:0008324//cation transmembrane transporter activity;GO:0010486//manganese:proton antiporter activity;GO:0015086//cadmium ion transmembrane transporter activity;GO:0015093//ferrous iron transmembrane transporter activity;GO:0015341//zinc efflux active transmembrane transporter activity	GO:0006811//ion transport;GO:0006812//cation transport;GO:0006876//cellular cadmium ion homeostasis;GO:0006879//cellular iron ion homeostasis;GO:0006882//cellular zinc ion homeostasis;GO:0034755//iron ion transmembrane transport;GO:0055085//transmembrane transport;GO:0070574//cadmium ion transmembrane transport;GO:0071421//manganese ion transmembrane transport;GO:0071577//zinc II ion transmembran…
476	MSTRG.3594.1	Os01g0837900	-	Similar to Protein kinase AFC1 (EC 2.7.1.-)	-	-	-	-	-	GO:0004672//protein kinase activity;GO:0005524//ATP binding	GO:0006468//protein phosphorylation
477	MSTRG.3601.1	Os01g0838200	-	Conserved hypothetical protein	-	-	-	-	-	-	-
477	MSTRG.3601.1	Os01g0838300	-	Hypothetical protein	-	-	-	-	-	-	-
477	MSTRG.3601.1	Os01g0838350	OsIPS2	Conserved hypothetical protein	-	-	-	-	-	-	-
477	MSTRG.3601.1	Os01g0838600	-	Zinc finger, C2H2-like domain containing protein	-	-	-	-	-	GO:0003676//nucleic acid binding	-
478	MSTRG.3606.1	Os01g0839100	OsZFP	Zinc finger, C2H2 domain containing protein	-	-	-	-	-	GO:0003676//nucleic acid binding	-
478	MSTRG.3606.1	Os01g0839300	-	Similar to 50S ribosomal protein L17	Genetic Information Processing	Translation	ko03010//Ribosome	K02879	GO:0005840//ribosome;GO:0015934//large ribosomal subunit	GO:0003735//structural constituent of ribosome	GO:0006412//translation
478	MSTRG.3606.1	Os01g0839400	-	Pentatricopeptide repeat domain containing protein	-	-	-	-	GO:0043231//intracellular membrane-bounded organelle	GO:0005515//protein binding	GO:0009451//RNA modification
479	MSTRG.3616.1	Os01g0840700	OsRPL36.2	Similar to 60S ribosomal protein L36	Genetic Information Processing	Translation	ko03010//Ribosome	K02920	GO:0005840//ribosome	GO:0003735//structural constituent of ribosome	GO:0006412//translation
479	MSTRG.3616.1	MSTRG.3617	--	PREDICTED: At3g17950 [Prunus dulcis]	-	-	-	-	-	-	-
479	MSTRG.3616.1	Os01g0840900	-	Conserved hypothetical protein	-	-	-	-	-	-	-
479	MSTRG.3616.1	Os01g0841000	-	ENTH/VHS domain containing protein	-	-	-	-	-	-	-
480	MSTRG.3639.1	MSTRG.3640	--	OSJNBa0072F16.15 [Oryza sativa Japonica Group]	-	-	-	-	-	GO:0046914//transition metal ion binding	-
480	MSTRG.3639.1	Os01g0845950	-	Conserved hypothetical protein	-	-	-	-	-	-	-
480	MSTRG.3639.1	Os01g0846000	-	Nucleic acid-binding, OB-fold domain containing protein	Genetic Information Processing;Genetic Information Processing;Genetic Information Processing;Genetic Information Processing	Replication and repair;Replication and repair;Replication and repair;Replication and repair	ko03420//Nucleotide excision repair;ko03440//Homologous recombination;ko03030//DNA replication;ko03430//Mismatch repair	K07466;K07466;K07466;K07466	-	-	-
481	MSTRG.3662.1	Os01g0848300	-	Pentatricopeptide repeat domain containing protein	-	-	-	-	GO:0043231//intracellular membrane-bounded organelle	GO:0005515//protein binding;GO:0008270//zinc ion binding	GO:0009451//RNA modification;GO:0031425//chloroplast RNA processing;GO:0031426//polycistronic mRNA processing
481	MSTRG.3662.1	Os01g0848200	P5CS2	Similar to Delta 1-pyrroline-5-carboxylate synthetase (P5CS) [Includes: Glutamate 5-kinase (EC 2.7.2.11) (Gamma-glutamyl kinase) (GK); Gamma-glutamyl phosphate reductase (GPR) (EC 1.2.1.41) (Glutamate-5-semialdehyde dehydrogenase) (Glutamyl-gamma-semialdehyde dehydrogenase)]	Metabolism;Metabolism;Metabolism;Metabolism	Global and overview maps;Global and overview maps;Global and overview maps;Amino acid metabolism	ko01100//Metabolic pathways;ko01110//Biosynthesis of secondary metabolites;ko01230//Biosynthesis of amino acids;ko00330//Arginine and proline metabolism	K12657;K12657;K12657;K12657	GO:0005737//cytoplasm	GO:0000166//nucleotide binding;GO:0003824//catalytic activity;GO:0004349//glutamate 5-kinase activity;GO:0004350//glutamate-5-semialdehyde dehydrogenase activity;GO:0005524//ATP binding;GO:0016301//kinase activity;GO:0016491//oxidoreductase activity;GO:0016620//oxidoreductase activity, acting on the aldehyde or oxo group of donors, NAD or NADP as acceptor;GO:0016740//transferase activity	GO:0006561//proline biosynthetic process;GO:0008152//metabolic process;GO:0008652//cellular amino acid biosynthetic process;GO:0016310//phosphorylation;GO:0055114//oxidation-reduction process;GO:0055129//L-proline biosynthetic process
482	MSTRG.3674.1	Os01g0850200	OsRFPV-3	Zinc finger, RING/FYVE/PHD-type domain containing protein	-	-	-	-	GO:0016021//integral component of membrane	GO:0008270//zinc ion binding	-
483	MSTRG.3675.1	Os01g0850200	OsRFPV-3	Zinc finger, RING/FYVE/PHD-type domain containing protein	-	-	-	-	GO:0016021//integral component of membrane	GO:0008270//zinc ion binding	-
484	MSTRG.3683.1	Os01g0851300	-	Reticulon family protein	-	-	-	-	GO:0005783//endoplasmic reticulum;GO:0005789//endoplasmic reticulum membrane;GO:0016020//membrane;GO:0016021//integral component of membrane	-	-
484	MSTRG.3683.1	Os01g0851600	-	3-oxo-5-alpha-steroid 4-dehydrogenase, C-terminal domain containing protein	Metabolism;Metabolism;Metabolism	Global and overview maps;Global and overview maps;Metabolism of terpenoids and polyketides	ko01100//Metabolic pathways;ko01110//Biosynthesis of secondary metabolites;ko00905//Brassinosteroid biosynthesis	K09591;K09591;K09591	GO:0005737//cytoplasm;GO:0016020//membrane;GO:0016021//integral component of membrane	GO:0003865//3-oxo-5-alpha-steroid 4-dehydrogenase activity;GO:0016491//oxidoreductase activity;GO:0016627//oxidoreductase activity, acting on the CH-CH group of donors;GO:0047751//cholestenone 5-alpha-reductase activity	GO:0006629//lipid metabolic process;GO:0006694//steroid biosynthetic process;GO:0008202//steroid metabolic process;GO:0016132//brassinosteroid biosynthetic process;GO:0055114//oxidation-reduction process
485	MSTRG.3686.1	Os01g0851600	-	3-oxo-5-alpha-steroid 4-dehydrogenase, C-terminal domain containing protein	Metabolism;Metabolism;Metabolism	Global and overview maps;Global and overview maps;Metabolism of terpenoids and polyketides	ko01100//Metabolic pathways;ko01110//Biosynthesis of secondary metabolites;ko00905//Brassinosteroid biosynthesis	K09591;K09591;K09591	GO:0005737//cytoplasm;GO:0016020//membrane;GO:0016021//integral component of membrane	GO:0003865//3-oxo-5-alpha-steroid 4-dehydrogenase activity;GO:0016491//oxidoreductase activity;GO:0016627//oxidoreductase activity, acting on the CH-CH group of donors;GO:0047751//cholestenone 5-alpha-reductase activity	GO:0006629//lipid metabolic process;GO:0006694//steroid biosynthetic process;GO:0008202//steroid metabolic process;GO:0016132//brassinosteroid biosynthetic process;GO:0055114//oxidation-reduction process
486	MSTRG.3689.1	Os01g0852100	OsRLCK48	Conserved hypothetical protein	-	-	-	-	-	-	-
486	MSTRG.3689.1	Os01g0852000	-	Hypothetical protein	-	-	-	-	-	-	-
486	MSTRG.3689.1	Os01g0852400	-	Protein of unknown function DUF740 family protein	-	-	-	-	-	-	-
487	MSTRG.3695.1	Os01g0853600	-	Similar to cDNA clone:J023041K02, full insert sequence	-	-	-	-	-	-	-
487	MSTRG.3695.1	Os01g0853700	-	Similar to MCB1 protein	-	-	-	-	GO:0005634//nucleus	GO:0003677//DNA binding	-
487	MSTRG.3695.1	Os01g0853400	OsCOI1a	Component of the SCF E3 ubiquitin ligase complex, Jasmonate-regulated defense responses, Promoting leaf senescenc	Environmental Information Processing	Signal transduction	ko04075//Plant hormone signal transduction	K13463	GO:0019005//SCF ubiquitin ligase complex	GO:0004842//ubiquitin-protein transferase activity;GO:0005515//protein binding	GO:0002213//defense response to insect;GO:0006511//ubiquitin-dependent protein catabolic process;GO:0006952//defense response;GO:0016567//protein ubiquitination;GO:0031146//SCF-dependent proteasomal ubiquitin-dependent protein catabolic process;GO:2000022//regulation of jasmonic acid mediated signaling pathway
488	MSTRG.3700.1	Os01g0853600	-	Similar to cDNA clone:J023041K02, full insert sequence	-	-	-	-	-	-	-
488	MSTRG.3700.1	Os01g0853700	-	Similar to MCB1 protein	-	-	-	-	GO:0005634//nucleus	GO:0003677//DNA binding	-
488	MSTRG.3700.1	Os01g0853800	-	C2 calcium-dependent membrane targeting domain containing protein	-	-	-	-	-	-	-
489	MSTRG.3704.1	MSTRG.3703	--	OSJNBa0049H08.6 [Oryza sativa Japonica Group]	-	-	-	-	-	GO:0004672//protein kinase activity;GO:0032550//purine ribonucleoside binding;GO:0046872//metal ion binding	GO:0006464//cellular protein modification process
489	MSTRG.3704.1	Os01g0855000	GPAT	Similar to Glycerol-3-phosphate acyltransferase 6 (EC 2.3.1.15) (AtGPAT6)	Metabolism;Metabolism;Metabolism;Metabolism	Global and overview maps;Global and overview maps;Lipid metabolism;Lipid metabolism	ko01100//Metabolic pathways;ko01110//Biosynthesis of secondary metabolites;ko00564//Glycerophospholipid metabolism;ko00561//Glycerolipid metabolism	K13508;K13508;K13508;K13508	GO:0016020//membrane;GO:0016021//integral component of membrane	GO:0016746//transferase activity, transferring acyl groups;GO:0016791//phosphatase activity;GO:0090447//glycerol-3-phosphate 2-O-acyltransferase activity	GO:0010143//cutin biosynthetic process;GO:0016311//dephosphorylation
490	MSTRG.3711.1	Os01g0855600	HS1	Similar to Hs1pro-1 protein	-	-	-	-	-	GO:0020037//heme binding;GO:0046872//metal ion binding	GO:0006952//defense response;GO:0019441//tryptophan catabolic process to kynurenine
490	MSTRG.3711.1	Os01g0855700	-	Hypothetical protein	-	-	-	-	-	-	-
490	MSTRG.3711.1	Os01g0856000	OsCDC6	Similar to CDC6 protein	-	-	-	-	GO:0005634//nucleus	GO:0003688//DNA replication origin binding	GO:0000278//mitotic cell cycle;GO:0006260//DNA replication;GO:0006270//DNA replication initiation;GO:0007049//cell cycle;GO:0033314//mitotic DNA replication checkpoint;GO:0051301//cell division
491	MSTRG.3716.1	Os01g0856800	-	Similar to pleckstrin homology domain-containing protein 1	-	-	-	-	-	-	-
491	MSTRG.3716.1	Os01g0856900	-	Glycoside hydrolase, carbohydrate-binding domain containing protein	-	-	-	-	-	GO:0030246//carbohydrate binding;GO:2001070//starch binding	-
491	MSTRG.3716.1	Os01g0857100	-	Non-protein coding transcript	-	-	-	-	-	-	-
491	MSTRG.3716.1	Os01g0856600	-	Nsp1-like, C-terminal family protein	Genetic Information Processing	Translation	ko03013//RNA transport	K14306	GO:0005643//nuclear pore;GO:0044613//nuclear pore central transport channel	GO:0005543//phospholipid binding;GO:0017056//structural constituent of nuclear pore	GO:0006405//RNA export from nucleus;GO:0006606//protein import into nucleus
491	MSTRG.3716.1	Os01g0857000	OsCPL2	Double-stranded RNA-binding-like domain containing protein	-	-	-	-	-	GO:0003723//RNA binding;GO:0008420//CTD phosphatase activity;GO:0016791//phosphatase activity	GO:0006970//response to osmotic stress;GO:0009733//response to auxin;GO:0048589//developmental growth;GO:0070940//dephosphorylation of RNA polymerase II C-terminal domain
492	MSTRG.3720.1	Os01g0856800	-	Similar to pleckstrin homology domain-containing protein 1	-	-	-	-	-	-	-
492	MSTRG.3720.1	Os01g0856850	-	Similar to ribosomal protein S7	Genetic Information Processing	Translation	ko03010//Ribosome	K02992	-	-	GO:0006412//translation
492	MSTRG.3720.1	Os01g0856900	-	Glycoside hydrolase, carbohydrate-binding domain containing protein	-	-	-	-	-	GO:0030246//carbohydrate binding;GO:2001070//starch binding	-
492	MSTRG.3720.1	Os01g0857100	-	Non-protein coding transcript	-	-	-	-	-	-	-
492	MSTRG.3720.1	Os01g0857200	-	Di-trans-poly-cis-decaprenylcistransferase family protein	Metabolism;Metabolism	Global and overview maps;Metabolism of terpenoids and polyketides	ko01110//Biosynthesis of secondary metabolites;ko00900//Terpenoid backbone biosynthesis	K11778;K11778	GO:0005783//endoplasmic reticulum	GO:0002094//polyprenyltransferase activity;GO:0016740//transferase activity;GO:0016765//transferase activity, transferring alkyl or aryl (other than methyl) groups;GO:0045547//dehydrodolichyl diphosphate synthase activity	GO:0016094//polyprenol biosynthetic process
493	MSTRG.3752.1	Os01g0862800	ENAC1	NAC (NAM ATAF1/2 CUC2) transcription factor, Early and transient regulator of abiotic stress response	-	-	-	-	GO:0005634//nucleus	GO:0003677//DNA binding	GO:0006355//regulation of transcription, DNA-templated
493	MSTRG.3752.1	Os01g0862850	-	Hypothetical protein	-	-	-	-	-	-	-
494	MSTRG.3760.2	Os01g0864200	-	Conserved hypothetical protein	-	-	-	-	GO:0016020//membrane;GO:0016021//integral component of membrane	-	-
494	MSTRG.3760.2	Os01g0864300	-	Harpin-induced 1 domain containing protein	-	-	-	-	GO:0009506//plasmodesma;GO:0016020//membrane;GO:0016021//integral component of membrane;GO:0046658//anchored component of plasma membrane	-	-
494	MSTRG.3760.2	Os01g0864500	OsSDS1	Harpin-induced 1 domain containing protein	-	-	-	-	GO:0009506//plasmodesma;GO:0016020//membrane;GO:0016021//integral component of membrane;GO:0046658//anchored component of plasma membrane	GO:0005515//protein binding	-
494	MSTRG.3760.2	Os01g0864566	-	Hypothetical conserved gene	-	-	-	-	-	-	-
494	MSTRG.3760.2	Os01g0864700	OsNek5	Similar to Serine/threonine-protein kinase Nek5	-	-	-	-	-	-	-
494	MSTRG.3760.2	MSTRG.3764	NEK5	serine/threonine-protein kinase Nek5 isoform X2 [Oryza sativa Japonica Group]	-	-	-	-	-	GO:0016301//kinase activity	GO:0016043//cellular component organization;GO:0044763//single-organism cellular process
495	MSTRG.3765.1	Os01g0864500	OsSDS1	Harpin-induced 1 domain containing protein	-	-	-	-	GO:0009506//plasmodesma;GO:0016020//membrane;GO:0016021//integral component of membrane;GO:0046658//anchored component of plasma membrane	GO:0005515//protein binding	-
495	MSTRG.3765.1	Os01g0864566	-	Hypothetical conserved gene	-	-	-	-	-	-	-
495	MSTRG.3765.1	Os01g0864700	OsNek5	Similar to Serine/threonine-protein kinase Nek5	-	-	-	-	-	-	-
495	MSTRG.3765.1	MSTRG.3764	NEK5	serine/threonine-protein kinase Nek5 isoform X2 [Oryza sativa Japonica Group]	-	-	-	-	-	GO:0016301//kinase activity	GO:0016043//cellular component organization;GO:0044763//single-organism cellular process
496	MSTRG.3780.1	Os01g0866100	RAC7	Similar to Actin 4	-	-	-	-	GO:0005737//cytoplasm;GO:0005856//cytoskeleton	GO:0000166//nucleotide binding;GO:0005524//ATP binding	-
496	MSTRG.3780.1	Os01g0866133	-	Hypothetical gene	-	-	-	-	-	-	-
496	MSTRG.3780.1	Os01g0866200	-	Similar to Histone H3	-	-	-	-	-	-	-
496	MSTRG.3780.1	Os01g0866300	-	VAMP-like protein YKT61 (AtYKT61) (Geranylgeranylated protein 1) (AtGP1)	Genetic Information Processing	Folding, sorting and degradation	ko04130//SNARE interactions in vesicular transport	K08516	GO:0016020//membrane;GO:0016021//integral component of membrane	-	GO:0016192//vesicle-mediated transport
496	MSTRG.3780.1	Os01g0866400	FR	Similar to Fructose-1,6-bisphosphatase (EC 3.1.3.11) (Fragment)	Metabolism;Metabolism;Metabolism;Metabolism;Metabolism;Metabolism;Metabolism	Global and overview maps;Global and overview maps;Global and overview maps;Carbohydrate metabolism;Energy metabolism;Carbohydrate metabolism;Carbohydrate metabolism	ko01100//Metabolic pathways;ko01110//Biosynthesis of secondary metabolites;ko01200//Carbon metabolism;ko00010//Glycolysis / Gluconeogenesis;ko00710//Carbon fixation in photosynthetic organisms;ko00051//Fructose and mannose metabolism;ko00030//Pentose phosphate pathway	K03841;K03841;K03841;K03841;K03841;K03841;K03841	-	GO:0016791//phosphatase activity;GO:0042132//fructose 1,6-bisphosphate 1-phosphatase activity;GO:0042578//phosphoric ester hydrolase activity	GO:0005975//carbohydrate metabolic process
496	MSTRG.3780.1	Os01g0866600	-	Similar to bolA-like protein	-	-	-	-	-	-	-
496	MSTRG.3780.1	Os01g0866700	-	Similar to Sm-like protein	Genetic Information Processing;Genetic Information Processing	Transcription;Folding, sorting and degradation	ko03040//Spliceosome;ko03018//RNA degradation	K12622;K12622	GO:0000932//cytoplasmic mRNA processing body;GO:0005634//nucleus;GO:0005681//spliceosomal complex;GO:0005688//U6 snRNP;GO:0046540//U4/U6 x U5 tri-snRNP complex;GO:0071011//precatalytic spliceosome;GO:0071013//catalytic step 2 spliceosome;GO:1990726//Lsm1-7-Pat1 complex	GO:0003723//RNA binding	GO:0000398//mRNA splicing, via spliceosome;GO:0000956//nuclear-transcribed mRNA catabolic process;GO:0006397//mRNA processing;GO:0008380//RNA splicing;GO:0033962//cytoplasmic mRNA processing body assembly
496	MSTRG.3780.1	Os01g0866750	-	Hypothetical conserved gene	-	-	-	-	-	-	-
497	MSTRG.3790.1	Os01g0867300	BZIP12	bZIP transcription factor, Abiotic stress response, ABA signaling, Suppressor of floral transition upon drought stres	Environmental Information Processing	Signal transduction	ko04075//Plant hormone signal transduction	K14432	GO:0005634//nucleus	GO:0003677//DNA binding;GO:0003700//transcription factor activity, sequence-specific DNA binding;GO:0043565//sequence-specific DNA binding	GO:0006355//regulation of transcription, DNA-templated;GO:0009738//abscisic acid-activated signaling pathway;GO:0009789//positive regulation of abscisic acid-activated signaling pathway;GO:0045893//positive regulation of transcription, DNA-templated;GO:1901002//positive regulation of response to salt stress;GO:1902584//positive regulation of response to water deprivation
497	MSTRG.3790.1	Os01g0867400	-	Non-protein coding transcript	-	-	-	-	-	-	-
497	MSTRG.3790.1	Os01g0867450	-	Non-protein coding transcript	-	-	-	-	-	-	-
497	MSTRG.3790.1	Os01g0867700	-	Yip1 domain containing protein	-	-	-	-	GO:0016020//membrane;GO:0016021//integral component of membrane	-	-
498	MSTRG.3806.1	Os01g0870201	-	Similar to GPI transamidase subunit PIG-U family protein	Metabolism;Metabolism	Global and overview maps;Glycan biosynthesis and metabolism	ko01100//Metabolic pathways;ko00563//Glycosylphosphatidylinositol(GPI)-anchor biosynthesis	K05293;K05293	GO:0016020//membrane;GO:0016021//integral component of membrane;GO:0042765//GPI-anchor transamidase complex	GO:0003923//GPI-anchor transamidase activity	GO:0016255//attachment of GPI anchor to protein;GO:0034394//protein localization to cell surface
498	MSTRG.3806.1	Os01g0870100	OsPOLLUX	Ion channel DMI1.,Cation channel protein	-	-	-	-	GO:0005634//nucleus;GO:0016020//membrane;GO:0016021//integral component of membrane;GO:0031965//nuclear membrane	-	GO:0006811//ion transport
499	MSTRG.3815.1	Os01g0871150	-	Hypothetical gene	-	-	-	-	GO:0016020//membrane;GO:0016021//integral component of membrane	-	-
499	MSTRG.3815.1	Os01g0871350	-	Conserved hypothetical protein	-	-	-	-	-	-	-
499	MSTRG.3815.1	Os01g0871100	-	Alpha/beta hydrolase fold-1 domain containing protein	-	-	-	-	GO:0016021//integral component of membrane	GO:0016787//hydrolase activity;GO:0016788//hydrolase activity, acting on ester bonds	GO:0044255//cellular lipid metabolic process
499	MSTRG.3815.1	Os01g0871300	-	Pyridoxal phosphate-dependent transferase, major region domain containing protein	Metabolism;Metabolism;Metabolism;Metabolism;Metabolism;Metabolism;Metabolism;Metabolism	Global and overview maps;Global and overview maps;Global and overview maps;Amino acid metabolism;Amino acid metabolism;Amino acid metabolism;Biosynthesis of other secondary metabolites;Biosynthesis of other secondary metabolites	ko01100//Metabolic pathways;ko01110//Biosynthesis of secondary metabolites;ko01230//Biosynthesis of amino acids;ko00360//Phenylalanine metabolism;ko00400//Phenylalanine, tyrosine and tryptophan biosynthesis;ko00350//Tyrosine metabolism;ko00960//Tropane, piperidine and pyridine alkaloid biosynthesis;ko00950//Isoquinoline alkaloid biosynthesis	K15849;K15849;K15849;K15849;K15849;K15849;K15849;K15849	GO:0009507//chloroplast;GO:0009570//chloroplast stroma	GO:0003824//catalytic activity;GO:0004069//L-aspartate:2-oxoglutarate aminotransferase activity;GO:0030170//pyridoxal phosphate binding;GO:0033853//aspartate-prephenate aminotransferase activity;GO:0033854//glutamate-prephenate aminotransferase activity	GO:0009058//biosynthetic process;GO:0009095//aromatic amino acid family biosynthetic process, prephenate pathway;GO:0009793//embryo development ending in seed dormancy
500	MSTRG.3841.1	Os01g0875400	-	Ubiquitin domain containing protein	-	-	-	-	GO:0005634//nucleus	GO:0004721//phosphoprotein phosphatase activity;GO:0005515//protein binding	GO:0006470//protein dephosphorylation
500	MSTRG.3841.1	Os01g0875500	OsBgal4	Similar to Beta-galactosidase (EC 3.2.1.23)	-	-	-	-	GO:0005618//cell wall;GO:0016020//membrane;GO:0016021//integral component of membrane	GO:0004553//hydrolase activity, hydrolyzing O-glycosyl compounds;GO:0004565//beta-galactosidase activity;GO:0016787//hydrolase activity;GO:0016798//hydrolase activity, acting on glycosyl bonds;GO:0030246//carbohydrate binding	GO:0005975//carbohydrate metabolic process;GO:0008152//metabolic process;GO:0080167//response to karrikin
501	MSTRG.3844.1	Os01g0875300	-	Similar to Universal stress protein family protein	-	-	-	-	-	-	-
501	MSTRG.3844.1	Os01g0875500	OsBgal4	Similar to Beta-galactosidase (EC 3.2.1.23)	-	-	-	-	GO:0005618//cell wall;GO:0016020//membrane;GO:0016021//integral component of membrane	GO:0004553//hydrolase activity, hydrolyzing O-glycosyl compounds;GO:0004565//beta-galactosidase activity;GO:0016787//hydrolase activity;GO:0016798//hydrolase activity, acting on glycosyl bonds;GO:0030246//carbohydrate binding	GO:0005975//carbohydrate metabolic process;GO:0008152//metabolic process;GO:0080167//response to karrikin
502	MSTRG.3846.4	Os01g0876100	OsCBSCLC1	Similar to Chloride channel	-	-	-	-	GO:0009705//plant-type vacuole membrane;GO:0016020//membrane;GO:0016021//integral component of membrane;GO:0043231//intracellular membrane-bounded organelle	GO:0005247//voltage-gated chloride channel activity;GO:0015108//chloride transmembrane transporter activity;GO:0022857//transmembrane transporter activity	GO:0006811//ion transport;GO:0006821//chloride transport;GO:0055085//transmembrane transport;GO:1902476//chloride transmembrane transport
502	MSTRG.3846.4	Os01g0876200	-	Similar to Chloride channel protein CLC-c (AtCLC-c)	-	-	-	-	-	-	-
502	MSTRG.3846.4	Os01g0876300	OsFbox051	F-box associated type 1 domain containing protein	-	-	-	-	-	GO:0005515//protein binding	-
502	MSTRG.3846.4	Os01g0876650	-	Hypothetical conserved gene	-	-	-	-	-	-	-
502	MSTRG.3846.4	Os01g0876400	-	Sad1/UNC-like, C-terminal domain containing protein	-	-	-	-	GO:0005737//cytoplasm;GO:0016020//membrane;GO:0016021//integral component of membrane	-	GO:0034975//protein folding in endoplasmic reticulum
503	MSTRG.3849.1	MSTRG.3851	RAD52-1	DNA repair RAD52-like protein 1, mitochondrial [Oryza sativa Japonica Group]	-	-	-	-	-	GO:0005488//binding	-
503	MSTRG.3849.1	Os01g0877001	-	Conserved hypothetical protein	-	-	-	-	-	-	-
504	MSTRG.3850.1	Os01g0876800	-	RNA-binding region RNP-1 (RNA recognition motif) domain containing protein	-	-	-	-	-	GO:0003676//nucleic acid binding;GO:0003723//RNA binding;GO:0003729//mRNA binding	-
504	MSTRG.3850.1	MSTRG.3851	RAD52-1	DNA repair RAD52-like protein 1, mitochondrial [Oryza sativa Japonica Group]	-	-	-	-	-	GO:0005488//binding	-
504	MSTRG.3850.1	Os01g0877001	-	Conserved hypothetical protein	-	-	-	-	-	-	-
504	MSTRG.3850.1	Os01g0877300	-	Mitotic checkpoint family protein	-	-	-	-	GO:0000776//kinetochore;GO:0005623//cell;GO:0005635//nuclear envelope;GO:0072686//mitotic spindle	-	GO:0007094//mitotic spindle assembly checkpoint;GO:0051315//attachment of mitotic spindle microtubules to kinetochore
505	MSTRG.3856.1	Os01g0877450	-	Hypothetical conserved gene	-	-	-	-	-	-	-
505	MSTRG.3856.1	Os01g0877500	-	Zinc finger, RING/FYVE/PHD-type domain containing protein	-	-	-	-	-	GO:0046872//metal ion binding	-
506	MSTRG.3857.1	Os01g0877450	-	Hypothetical conserved gene	-	-	-	-	-	-	-
506	MSTRG.3857.1	Os01g0877500	-	Zinc finger, RING/FYVE/PHD-type domain containing protein	-	-	-	-	-	GO:0046872//metal ion binding	-
507	MSTRG.3874.1	Os01g0878900	-	Similar to 4,5-DOPA dioxygenase extradiol-like protein	Metabolism	Biosynthesis of other secondary metabolites	ko00965//Betalain biosynthesis	K15777	-	GO:0008198//ferrous iron binding;GO:0008270//zinc ion binding;GO:0016491//oxidoreductase activity;GO:0016701//oxidoreductase activity, acting on single donors with incorporation of molecular oxygen;GO:0051213//dioxygenase activity	GO:0006725//cellular aromatic compound metabolic process;GO:0055114//oxidation-reduction process
507	MSTRG.3874.1	Os01g0879000	-	Hypothetical protein	-	-	-	-	-	-	-
507	MSTRG.3874.1	Os01g0879100	-	Hypothetical protein	-	-	-	-	-	-	-
507	MSTRG.3874.1	Os01g0879200	DRR206	Plant disease resistance response protein domain containing protein	-	-	-	-	GO:0005576//extracellular region;GO:0048046//apoplast	-	-
507	MSTRG.3874.1	Os01g0879300	-	Hypothetical conserved gene	-	-	-	-	GO:0005576//extracellular region;GO:0048046//apoplast	-	-
507	MSTRG.3874.1	Os01g0879400	-	Glycoside hydrolase, family 43 protein	-	-	-	-	-	GO:0004553//hydrolase activity, hydrolyzing O-glycosyl compounds;GO:0016787//hydrolase activity;GO:0016798//hydrolase activity, acting on glycosyl bonds	GO:0005975//carbohydrate metabolic process;GO:0008152//metabolic process
507	MSTRG.3874.1	Os01g0879500	-	RuBisCO-cytochrome methylase, RMS1 domain containing protein	-	-	-	-	GO:0005634//nucleus	GO:0005515//protein binding;GO:0008168//methyltransferase activity;GO:0016279//protein-lysine N-methyltransferase activity;GO:0016740//transferase activity	GO:0018026//peptidyl-lysine monomethylation;GO:0032259//methylation
507	MSTRG.3874.1	Os01g0878800	-	Similar to 4,5-DOPA dioxygenase extradiol	Metabolism	Biosynthesis of other secondary metabolites	ko00965//Betalain biosynthesis	K15777	-	GO:0008198//ferrous iron binding;GO:0008270//zinc ion binding;GO:0016491//oxidoreductase activity;GO:0016701//oxidoreductase activity, acting on single donors with incorporation of molecular oxygen;GO:0051213//dioxygenase activity	GO:0006725//cellular aromatic compound metabolic process;GO:0055114//oxidation-reduction process
508	MSTRG.3881.1	Os01g0880200	-	Glycosyl transferase, family 8 protein	-	-	-	-	GO:0016020//membrane;GO:0016021//integral component of membrane	GO:0016740//transferase activity;GO:0016757//transferase activity, transferring glycosyl groups	GO:0045492//xylan biosynthetic process
508	MSTRG.3881.1	Os01g0880250	-	Hypothetical protein	-	-	-	-	-	-	-
508	MSTRG.3881.1	Os01g0880400	OsTBL26	Protein of unknown function DUF231, plant domain containing protein	-	-	-	-	GO:0005794//Golgi apparatus;GO:0016020//membrane;GO:0016021//integral component of membrane	GO:0016413//O-acetyltransferase activity	-
509	MSTRG.3889.1	Os01g0881400	-	DNA repair metallo-beta-lactamase domain containing protein	-	-	-	-	GO:0000784//nuclear chromosome, telomeric region	GO:0003684//damaged DNA binding;GO:0016874//ligase activity;GO:0035312//5'-3' exodeoxyribonuclease activity	GO:0006303//double-strand break repair via nonhomologous end joining;GO:0031848//protection from non-homologous end joining at telomere;GO:0036297//interstrand cross-link repair;GO:0090305//nucleic acid phosphodiester bond hydrolysis
509	MSTRG.3889.1	Os01g0881450	-	Non-protein coding transcript	-	-	-	-	-	-	-
509	MSTRG.3889.1	Os01g0881500	SCL1	Similar to Scarecrow-like 1 (Fragment)	-	-	-	-	GO:0005634//nucleus	GO:0003700//transcription factor activity, sequence-specific DNA binding;GO:0043565//sequence-specific DNA binding;GO:0044212//transcription regulatory region DNA binding	GO:0006355//regulation of transcription, DNA-templated
509	MSTRG.3889.1	Os01g0887100	OsCMS	Similar to 4-(Cytidine 5'-diphospho)-2-C-methyl-D-erythritol synthase	Metabolism;Metabolism;Metabolism	Global and overview maps;Global and overview maps;Metabolism of terpenoids and polyketides	ko01100//Metabolic pathways;ko01110//Biosynthesis of secondary metabolites;ko00900//Terpenoid backbone biosynthesis	K00991;K00991;K00991	GO:0009507//chloroplast;GO:0009570//chloroplast stroma	GO:0003824//catalytic activity;GO:0050518//2-C-methyl-D-erythritol 4-phosphate cytidylyltransferase activity;GO:0070567//cytidylyltransferase activity	GO:0008299//isoprenoid biosynthetic process
509	MSTRG.3889.1	Os01g0887400	-	Similar to predicted protein	-	-	-	-	GO:0009507//chloroplast	GO:0003747//translation release factor activity;GO:0016149//translation release factor activity, codon specific;GO:0043022//ribosome binding	GO:0006415//translational termination
510	MSTRG.3914.1	Os01g0884300	OsNAC6	No apical meristem (NAM) protein domain containing protein	-	-	-	-	GO:0005634//nucleus	GO:0003677//DNA binding;GO:0005515//protein binding;GO:0043565//sequence-specific DNA binding	GO:0006355//regulation of transcription, DNA-templated;GO:0009409//response to cold;GO:0040008//regulation of growth;GO:0045893//positive regulation of transcription, DNA-templated;GO:0048364//root development;GO:1900150//regulation of defense response to fungus;GO:1901002//positive regulation of response to salt stress;GO:1902584//positive regulation of response to water deprivation
510	MSTRG.3914.1	Os01g0884350	-	Hypothetical protein	-	-	-	-	-	-	-
510	MSTRG.3914.1	Os01g0883900	-	Protein of unknown function DUF248, methyltransferase putative family protein	-	-	-	-	GO:0005737//cytoplasm;GO:0005768//endosome;GO:0005802//trans-Golgi network;GO:0016020//membrane;GO:0016021//integral component of membrane	GO:0008168//methyltransferase activity	-
510	MSTRG.3914.1	Os01g0884050	-	Non-protein coding transcript	-	-	-	-	-	-	-
511	MSTRG.3917.1	Os01g0884200	-	Hypothetical gene	-	-	-	-	-	-	-
511	MSTRG.3917.1	Os01g0884300	OsNAC6	No apical meristem (NAM) protein domain containing protein	-	-	-	-	GO:0005634//nucleus	GO:0003677//DNA binding;GO:0005515//protein binding;GO:0043565//sequence-specific DNA binding	GO:0006355//regulation of transcription, DNA-templated;GO:0009409//response to cold;GO:0040008//regulation of growth;GO:0045893//positive regulation of transcription, DNA-templated;GO:0048364//root development;GO:1900150//regulation of defense response to fungus;GO:1901002//positive regulation of response to salt stress;GO:1902584//positive regulation of response to water deprivation
511	MSTRG.3917.1	Os01g0884350	-	Hypothetical protein	-	-	-	-	-	-	-
511	MSTRG.3917.1	Os01g0884400	OsPUB16	Armadillo domain containing protein	-	-	-	-	GO:0005634//nucleus;GO:0005737//cytoplasm	GO:0004842//ubiquitin-protein transferase activity;GO:0005515//protein binding	GO:0016567//protein ubiquitination
511	MSTRG.3917.1	Os01g0884450	-	Non-protein coding transcript	-	-	-	-	-	-	-
511	MSTRG.3917.1	Os01g0884500	-	Plus-3 domain containing protein	-	-	-	-	-	GO:0003677//DNA binding;GO:0005515//protein binding	-
512	MSTRG.3938.1	Os01g0886300	-	K Homology domain containing protein	-	-	-	-	GO:0005634//nucleus	GO:0003676//nucleic acid binding;GO:0003723//RNA binding	-
512	MSTRG.3938.1	Os01g0886350	-	Conserved hypothetical protein	-	-	-	-	GO:0016021//integral component of membrane	-	-
512	MSTRG.3938.1	Os01g0886600	OsSTA38	Similar to CLP protease regulatory subunit CLPX precursor	-	-	-	-	GO:0005759//mitochondrial matrix	GO:0004176//ATP-dependent peptidase activity;GO:0005524//ATP binding;GO:0051082//unfolded protein binding	GO:0006457//protein folding;GO:0006508//proteolysis;GO:0030163//protein catabolic process
512	MSTRG.3938.1	Os01g0886700	-	Conserved hypothetical protein	-	-	-	-	GO:0005794//Golgi apparatus;GO:0016020//membrane;GO:0016021//integral component of membrane	GO:0016413//O-acetyltransferase activity	-
513	MSTRG.3938.2	Os01g0886300	-	K Homology domain containing protein	-	-	-	-	GO:0005634//nucleus	GO:0003676//nucleic acid binding;GO:0003723//RNA binding	-
513	MSTRG.3938.2	Os01g0886350	-	Conserved hypothetical protein	-	-	-	-	GO:0016021//integral component of membrane	-	-
513	MSTRG.3938.2	Os01g0886600	OsSTA38	Similar to CLP protease regulatory subunit CLPX precursor	-	-	-	-	GO:0005759//mitochondrial matrix	GO:0004176//ATP-dependent peptidase activity;GO:0005524//ATP binding;GO:0051082//unfolded protein binding	GO:0006457//protein folding;GO:0006508//proteolysis;GO:0030163//protein catabolic process
513	MSTRG.3938.2	Os01g0886700	-	Conserved hypothetical protein	-	-	-	-	GO:0005794//Golgi apparatus;GO:0016020//membrane;GO:0016021//integral component of membrane	GO:0016413//O-acetyltransferase activity	-
514	MSTRG.3938.5	Os01g0886300	-	K Homology domain containing protein	-	-	-	-	GO:0005634//nucleus	GO:0003676//nucleic acid binding;GO:0003723//RNA binding	-
514	MSTRG.3938.5	Os01g0886350	-	Conserved hypothetical protein	-	-	-	-	GO:0016021//integral component of membrane	-	-
514	MSTRG.3938.5	Os01g0886600	OsSTA38	Similar to CLP protease regulatory subunit CLPX precursor	-	-	-	-	GO:0005759//mitochondrial matrix	GO:0004176//ATP-dependent peptidase activity;GO:0005524//ATP binding;GO:0051082//unfolded protein binding	GO:0006457//protein folding;GO:0006508//proteolysis;GO:0030163//protein catabolic process
514	MSTRG.3938.5	Os01g0886700	-	Conserved hypothetical protein	-	-	-	-	GO:0005794//Golgi apparatus;GO:0016020//membrane;GO:0016021//integral component of membrane	GO:0016413//O-acetyltransferase activity	-
515	MSTRG.3940.1	Os01g0886350	-	Conserved hypothetical protein	-	-	-	-	GO:0016021//integral component of membrane	-	-
515	MSTRG.3940.1	Os01g0886700	-	Conserved hypothetical protein	-	-	-	-	GO:0005794//Golgi apparatus;GO:0016020//membrane;GO:0016021//integral component of membrane	GO:0016413//O-acetyltransferase activity	-
515	MSTRG.3940.1	Os01g0886500	-	Similar to Ribosomal protein L37	-	-	-	-	GO:0016020//membrane;GO:0016021//integral component of membrane	-	-
515	MSTRG.3940.1	Os01g0886900	OsRUS6A	Similar to EMB1879 (EMBRYO DEFECTIVE 1879)	-	-	-	-	-	-	-
516	MSTRG.3969.2	MSTRG.3970	PAE5	pectin acetylesterase 5 isoform X3 [Oryza sativa Japonica Group]	-	-	-	-	-	-	-
516	MSTRG.3969.2	Os01g0892300	-	Leucine-rich repeat, plant specific containing protein	-	-	-	-	GO:0016020//membrane;GO:0016021//integral component of membrane	GO:0005515//protein binding	-
517	MSTRG.3985.1	Os01g0895300	-	Cytochrome b561, eukaryote domain containing protein	-	-	-	-	GO:0016020//membrane;GO:0016021//integral component of membrane	GO:0046872//metal ion binding	GO:0055114//oxidation-reduction process
517	MSTRG.3985.1	Os01g0895500	OsRhmbd5	Peptidase S54, rhomboid domain containing protein	-	-	-	-	GO:0016020//membrane;GO:0016021//integral component of membrane	GO:0004252//serine-type endopeptidase activity	GO:0006508//proteolysis
518	MSTRG.3986.1	Os01g0895300	-	Cytochrome b561, eukaryote domain containing protein	-	-	-	-	GO:0016020//membrane;GO:0016021//integral component of membrane	GO:0046872//metal ion binding	GO:0055114//oxidation-reduction process
518	MSTRG.3986.1	Os01g0895500	OsRhmbd5	Peptidase S54, rhomboid domain containing protein	-	-	-	-	GO:0016020//membrane;GO:0016021//integral component of membrane	GO:0004252//serine-type endopeptidase activity	GO:0006508//proteolysis
519	MSTRG.3987.4	Os01g0896300	FSM	Hypothetical conserved gene	-	-	-	-	GO:0005634//nucleus;GO:0033186//CAF-1 complex	-	GO:0006281//DNA repair;GO:0006310//DNA recombination;GO:0006325//chromatin organization;GO:0006334//nucleosome assembly;GO:0006974//cellular response to DNA damage stimulus;GO:0010389//regulation of G2/M transition of mitotic cell cycle;GO:0010448//vegetative meristem growth;GO:0010449//root meristem growth;GO:0044772//mitotic cell cycle phase transition
519	MSTRG.3987.4	Os01g0896350	-	Non-protein coding transcript	-	-	-	-	-	-	-
519	MSTRG.3987.4	Os01g0896400	-	Similar to JHL23J11.5 protein	-	-	-	-	GO:0016020//membrane;GO:0016021//integral component of membrane	-	-
519	MSTRG.3987.4	Os01g0896700	-	Similar to 60S ribosomal protein L5	Genetic Information Processing	Translation	ko03010//Ribosome	K02932	GO:0005634//nucleus;GO:0005737//cytoplasm;GO:0005840//ribosome;GO:0022625//cytosolic large ribosomal subunit	GO:0003723//RNA binding;GO:0003735//structural constituent of ribosome;GO:0008097//5S rRNA binding;GO:0019843//rRNA binding	GO:0000027//ribosomal large subunit assembly;GO:0006412//translation
519	MSTRG.3987.4	Os01g0896800	RPL5	Ribosomal protein L18/L5 domain containing protein	Genetic Information Processing	Translation	ko03010//Ribosome	K02932	GO:0005840//ribosome;GO:0022625//cytosolic large ribosomal subunit	GO:0003735//structural constituent of ribosome;GO:0008097//5S rRNA binding	GO:0000027//ribosomal large subunit assembly;GO:0006412//translation
520	MSTRG.3992.1	Os01g0897000	CDKB	Similar to Cyclin-dependent kinase B1-1	-	-	-	-	GO:0005634//nucleus	GO:0000166//nucleotide binding;GO:0004672//protein kinase activity;GO:0004674//protein serine/threonine kinase activity;GO:0004693//cyclin-dependent protein serine/threonine kinase activity;GO:0005524//ATP binding;GO:0008353//RNA polymerase II carboxy-terminal domain kinase activity;GO:0016301//kinase activity;GO:0016740//transferase activity	GO:0006468//protein phosphorylation;GO:0016310//phosphorylation;GO:0051726//regulation of cell cycle
520	MSTRG.3992.1	Os01g0897150	-	Non-protein coding transcript	-	-	-	-	-	-	-
520	MSTRG.3992.1	Os01g0897200	OsRNS2	Similar to Ribonuclease 2 precursor (EC 3.1.27.1)	-	-	-	-	GO:0005576//extracellular region	GO:0003723//RNA binding;GO:0004521//endoribonuclease activity;GO:0033897//ribonuclease T2 activity	GO:0006401//RNA catabolic process;GO:0090502//RNA phosphodiester bond hydrolysis, endonucleolytic
520	MSTRG.3992.1	Os01g0897300	OsRNS6	Similar to Ribonuclease 2	-	-	-	-	GO:0005576//extracellular region	GO:0003723//RNA binding;GO:0004521//endoribonuclease activity;GO:0033897//ribonuclease T2 activity	GO:0006401//RNA catabolic process;GO:0090502//RNA phosphodiester bond hydrolysis, endonucleolytic
521	MSTRG.3996.1	Os01g0897100	-	Conserved hypothetical protein	-	-	-	-	-	-	-
521	MSTRG.3996.1	Os01g0897150	-	Non-protein coding transcript	-	-	-	-	-	-	-
521	MSTRG.3996.1	Os01g0897200	OsRNS2	Similar to Ribonuclease 2 precursor (EC 3.1.27.1)	-	-	-	-	GO:0005576//extracellular region	GO:0003723//RNA binding;GO:0004521//endoribonuclease activity;GO:0033897//ribonuclease T2 activity	GO:0006401//RNA catabolic process;GO:0090502//RNA phosphodiester bond hydrolysis, endonucleolytic
521	MSTRG.3996.1	MSTRG.3999	--	pentatricopeptide repeat-containing protein At3g02650, mitochondrial [Oryza sativa Japonica Group]	-	-	-	-	-	-	-
521	MSTRG.3996.1	Os01g0897500	ppr564	Pentatricopeptide repeat domain containing protein	-	-	-	-	GO:0005739//mitochondrion	GO:0005515//protein binding	-
521	MSTRG.3996.1	Os01g0897600	Os1bglu4	Glycoside hydrolase, family 1 protein	Metabolism;Metabolism;Metabolism;Metabolism;Metabolism	Global and overview maps;Global and overview maps;Biosynthesis of other secondary metabolites;Carbohydrate metabolism;Metabolism of other amino acids	ko01100//Metabolic pathways;ko01110//Biosynthesis of secondary metabolites;ko00940//Phenylpropanoid biosynthesis;ko00500//Starch and sucrose metabolism;ko00460//Cyanoamino acid metabolism	K01188;K01188;K01188;K01188;K01188	GO:0005829//cytosol	GO:0004553//hydrolase activity, hydrolyzing O-glycosyl compounds;GO:0008422//beta-glucosidase activity;GO:0016787//hydrolase activity;GO:0016798//hydrolase activity, acting on glycosyl bonds	GO:0005975//carbohydrate metabolic process;GO:0008152//metabolic process;GO:0009866//induced systemic resistance, ethylene mediated signaling pathway;GO:0019748//secondary metabolic process;GO:0030245//cellulose catabolic process;GO:0071281//cellular response to iron ion;GO:0071732//cellular response to nitric oxide;GO:1990641//response to iron ion starvation
522	MSTRG.3997.1	Os01g0897100	-	Conserved hypothetical protein	-	-	-	-	-	-	-
522	MSTRG.3997.1	Os01g0897150	-	Non-protein coding transcript	-	-	-	-	-	-	-
522	MSTRG.3997.1	Os01g0897200	OsRNS2	Similar to Ribonuclease 2 precursor (EC 3.1.27.1)	-	-	-	-	GO:0005576//extracellular region	GO:0003723//RNA binding;GO:0004521//endoribonuclease activity;GO:0033897//ribonuclease T2 activity	GO:0006401//RNA catabolic process;GO:0090502//RNA phosphodiester bond hydrolysis, endonucleolytic
522	MSTRG.3997.1	Os01g0897300	OsRNS6	Similar to Ribonuclease 2	-	-	-	-	GO:0005576//extracellular region	GO:0003723//RNA binding;GO:0004521//endoribonuclease activity;GO:0033897//ribonuclease T2 activity	GO:0006401//RNA catabolic process;GO:0090502//RNA phosphodiester bond hydrolysis, endonucleolytic
522	MSTRG.3997.1	MSTRG.3999	--	pentatricopeptide repeat-containing protein At3g02650, mitochondrial [Oryza sativa Japonica Group]	-	-	-	-	-	-	-
522	MSTRG.3997.1	Os01g0897500	ppr564	Pentatricopeptide repeat domain containing protein	-	-	-	-	GO:0005739//mitochondrion	GO:0005515//protein binding	-
522	MSTRG.3997.1	Os01g0897600	Os1bglu4	Glycoside hydrolase, family 1 protein	Metabolism;Metabolism;Metabolism;Metabolism;Metabolism	Global and overview maps;Global and overview maps;Biosynthesis of other secondary metabolites;Carbohydrate metabolism;Metabolism of other amino acids	ko01100//Metabolic pathways;ko01110//Biosynthesis of secondary metabolites;ko00940//Phenylpropanoid biosynthesis;ko00500//Starch and sucrose metabolism;ko00460//Cyanoamino acid metabolism	K01188;K01188;K01188;K01188;K01188	GO:0005829//cytosol	GO:0004553//hydrolase activity, hydrolyzing O-glycosyl compounds;GO:0008422//beta-glucosidase activity;GO:0016787//hydrolase activity;GO:0016798//hydrolase activity, acting on glycosyl bonds	GO:0005975//carbohydrate metabolic process;GO:0008152//metabolic process;GO:0009866//induced systemic resistance, ethylene mediated signaling pathway;GO:0019748//secondary metabolic process;GO:0030245//cellulose catabolic process;GO:0071281//cellular response to iron ion;GO:0071732//cellular response to nitric oxide;GO:1990641//response to iron ion starvation
523	MSTRG.3998.1	Os01g0897100	-	Conserved hypothetical protein	-	-	-	-	-	-	-
523	MSTRG.3998.1	Os01g0897150	-	Non-protein coding transcript	-	-	-	-	-	-	-
523	MSTRG.3998.1	Os01g0897200	OsRNS2	Similar to Ribonuclease 2 precursor (EC 3.1.27.1)	-	-	-	-	GO:0005576//extracellular region	GO:0003723//RNA binding;GO:0004521//endoribonuclease activity;GO:0033897//ribonuclease T2 activity	GO:0006401//RNA catabolic process;GO:0090502//RNA phosphodiester bond hydrolysis, endonucleolytic
523	MSTRG.3998.1	Os01g0897300	OsRNS6	Similar to Ribonuclease 2	-	-	-	-	GO:0005576//extracellular region	GO:0003723//RNA binding;GO:0004521//endoribonuclease activity;GO:0033897//ribonuclease T2 activity	GO:0006401//RNA catabolic process;GO:0090502//RNA phosphodiester bond hydrolysis, endonucleolytic
523	MSTRG.3998.1	MSTRG.3999	--	pentatricopeptide repeat-containing protein At3g02650, mitochondrial [Oryza sativa Japonica Group]	-	-	-	-	-	-	-
523	MSTRG.3998.1	Os01g0897500	ppr564	Pentatricopeptide repeat domain containing protein	-	-	-	-	GO:0005739//mitochondrion	GO:0005515//protein binding	-
523	MSTRG.3998.1	Os01g0897600	Os1bglu4	Glycoside hydrolase, family 1 protein	Metabolism;Metabolism;Metabolism;Metabolism;Metabolism	Global and overview maps;Global and overview maps;Biosynthesis of other secondary metabolites;Carbohydrate metabolism;Metabolism of other amino acids	ko01100//Metabolic pathways;ko01110//Biosynthesis of secondary metabolites;ko00940//Phenylpropanoid biosynthesis;ko00500//Starch and sucrose metabolism;ko00460//Cyanoamino acid metabolism	K01188;K01188;K01188;K01188;K01188	GO:0005829//cytosol	GO:0004553//hydrolase activity, hydrolyzing O-glycosyl compounds;GO:0008422//beta-glucosidase activity;GO:0016787//hydrolase activity;GO:0016798//hydrolase activity, acting on glycosyl bonds	GO:0005975//carbohydrate metabolic process;GO:0008152//metabolic process;GO:0009866//induced systemic resistance, ethylene mediated signaling pathway;GO:0019748//secondary metabolic process;GO:0030245//cellulose catabolic process;GO:0071281//cellular response to iron ion;GO:0071732//cellular response to nitric oxide;GO:1990641//response to iron ion starvation
524	MSTRG.4008.1	Os01g0898600	-	Conserved hypothetical protein	-	-	-	-	GO:0016020//membrane;GO:0016021//integral component of membrane	-	-
524	MSTRG.4008.1	Os01g0898900	-	Nucleotide-sugar transporter family protein	-	-	-	-	GO:0000139//Golgi membrane;GO:0005794//Golgi apparatus;GO:0016020//membrane;GO:0016021//integral component of membrane;GO:0030173//integral component of Golgi membrane	GO:0015136//sialic acid transmembrane transporter activity;GO:0015165//pyrimidine nucleotide-sugar transmembrane transporter activity	GO:0008643//carbohydrate transport;GO:0090481//pyrimidine nucleotide-sugar transmembrane transport
525	MSTRG.4013.1	MSTRG.4011	At2g43200	probable methyltransferase PMT19 [Oryza sativa Japonica Group]	-	-	-	-	GO:0016020//membrane	-	-
525	MSTRG.4013.1	Os01g0899275	-	Similar to ATP synthase F0 subunit 9	Metabolism;Metabolism	Global and overview maps;Energy metabolism	ko01100//Metabolic pathways;ko00190//Oxidative phosphorylation	K02128;K02128	GO:0000276//mitochondrial proton-transporting ATP synthase complex, coupling factor F(o);GO:0045263//proton-transporting ATP synthase complex, coupling factor F(o)	GO:0015078//hydrogen ion transmembrane transporter activity;GO:0046933//proton-transporting ATP synthase activity, rotational mechanism	GO:0015986//ATP synthesis coupled proton transport
525	MSTRG.4013.1	Os01g0899350	-	Similar to ATP synthase F0 subunit 9	Metabolism;Metabolism	Global and overview maps;Energy metabolism	ko01100//Metabolic pathways;ko00190//Oxidative phosphorylation	K02128;K02128	GO:0000276//mitochondrial proton-transporting ATP synthase complex, coupling factor F(o);GO:0045263//proton-transporting ATP synthase complex, coupling factor F(o)	GO:0008289//lipid binding;GO:0015078//hydrogen ion transmembrane transporter activity;GO:0046933//proton-transporting ATP synthase activity, rotational mechanism	GO:0006811//ion transport;GO:0015986//ATP synthesis coupled proton transport
525	MSTRG.4013.1	Os01g0899387	-	Conserved hypothetical protein	-	-	-	-	-	-	-
525	MSTRG.4013.1	Os01g0899425	-	Similar to ribulose 1,5-bisphosphate carboxylase/oxygenase large subunit	Metabolism;Metabolism;Metabolism;Metabolism;Metabolism	Global and overview maps;Global and overview maps;Global and overview maps;Energy metabolism;Carbohydrate metabolism	ko01100//Metabolic pathways;ko01110//Biosynthesis of secondary metabolites;ko01200//Carbon metabolism;ko00710//Carbon fixation in photosynthetic organisms;ko00630//Glyoxylate and dicarboxylate metabolism	K01601;K01601;K01601;K01601;K01601	GO:0009522//photosystem I;GO:0016021//integral component of membrane	GO:0000287//magnesium ion binding;GO:0016984//ribulose-bisphosphate carboxylase activity	GO:0015977//carbon fixation;GO:0015979//photosynthesis
526	MSTRG.4018.1	Os01g0899350	-	Similar to ATP synthase F0 subunit 9	Metabolism;Metabolism	Global and overview maps;Energy metabolism	ko01100//Metabolic pathways;ko00190//Oxidative phosphorylation	K02128;K02128	GO:0000276//mitochondrial proton-transporting ATP synthase complex, coupling factor F(o);GO:0045263//proton-transporting ATP synthase complex, coupling factor F(o)	GO:0008289//lipid binding;GO:0015078//hydrogen ion transmembrane transporter activity;GO:0046933//proton-transporting ATP synthase activity, rotational mechanism	GO:0006811//ion transport;GO:0015986//ATP synthesis coupled proton transport
526	MSTRG.4018.1	Os01g0899387	-	Conserved hypothetical protein	-	-	-	-	-	-	-
526	MSTRG.4018.1	Os01g0899425	-	Similar to ribulose 1,5-bisphosphate carboxylase/oxygenase large subunit	Metabolism;Metabolism;Metabolism;Metabolism;Metabolism	Global and overview maps;Global and overview maps;Global and overview maps;Energy metabolism;Carbohydrate metabolism	ko01100//Metabolic pathways;ko01110//Biosynthesis of secondary metabolites;ko01200//Carbon metabolism;ko00710//Carbon fixation in photosynthetic organisms;ko00630//Glyoxylate and dicarboxylate metabolism	K01601;K01601;K01601;K01601;K01601	GO:0009522//photosystem I;GO:0016021//integral component of membrane	GO:0000287//magnesium ion binding;GO:0016984//ribulose-bisphosphate carboxylase activity	GO:0015977//carbon fixation;GO:0015979//photosynthesis
526	MSTRG.4018.1	Os01g0899500	-	Hypothetical conserved gene	-	-	-	-	-	-	-
527	MSTRG.4020.1	Os01g0899350	-	Similar to ATP synthase F0 subunit 9	Metabolism;Metabolism	Global and overview maps;Energy metabolism	ko01100//Metabolic pathways;ko00190//Oxidative phosphorylation	K02128;K02128	GO:0000276//mitochondrial proton-transporting ATP synthase complex, coupling factor F(o);GO:0045263//proton-transporting ATP synthase complex, coupling factor F(o)	GO:0008289//lipid binding;GO:0015078//hydrogen ion transmembrane transporter activity;GO:0046933//proton-transporting ATP synthase activity, rotational mechanism	GO:0006811//ion transport;GO:0015986//ATP synthesis coupled proton transport
527	MSTRG.4020.1	Os01g0899387	-	Conserved hypothetical protein	-	-	-	-	-	-	-
527	MSTRG.4020.1	Os01g0899425	-	Similar to ribulose 1,5-bisphosphate carboxylase/oxygenase large subunit	Metabolism;Metabolism;Metabolism;Metabolism;Metabolism	Global and overview maps;Global and overview maps;Global and overview maps;Energy metabolism;Carbohydrate metabolism	ko01100//Metabolic pathways;ko01110//Biosynthesis of secondary metabolites;ko01200//Carbon metabolism;ko00710//Carbon fixation in photosynthetic organisms;ko00630//Glyoxylate and dicarboxylate metabolism	K01601;K01601;K01601;K01601;K01601	GO:0009522//photosystem I;GO:0016021//integral component of membrane	GO:0000287//magnesium ion binding;GO:0016984//ribulose-bisphosphate carboxylase activity	GO:0015977//carbon fixation;GO:0015979//photosynthesis
527	MSTRG.4020.1	Os01g0899500	-	Hypothetical conserved gene	-	-	-	-	-	-	-
528	MSTRG.4021.1	Os01g0899425	-	Similar to ribulose 1,5-bisphosphate carboxylase/oxygenase large subunit	Metabolism;Metabolism;Metabolism;Metabolism;Metabolism	Global and overview maps;Global and overview maps;Global and overview maps;Energy metabolism;Carbohydrate metabolism	ko01100//Metabolic pathways;ko01110//Biosynthesis of secondary metabolites;ko01200//Carbon metabolism;ko00710//Carbon fixation in photosynthetic organisms;ko00630//Glyoxylate and dicarboxylate metabolism	K01601;K01601;K01601;K01601;K01601	GO:0009522//photosystem I;GO:0016021//integral component of membrane	GO:0000287//magnesium ion binding;GO:0016984//ribulose-bisphosphate carboxylase activity	GO:0015977//carbon fixation;GO:0015979//photosynthesis
528	MSTRG.4021.1	Os01g0899500	-	Hypothetical conserved gene	-	-	-	-	-	-	-
528	MSTRG.4021.1	Os01g0899700	-	Pollen Ole e 1 allergen and extensin domain containing protein	-	-	-	-	GO:0071944//cell periphery	-	-
529	MSTRG.4040.1	Os01g0901800	-	Similar to acid phosphatase/vanadium-dependent haloperoxidase related	-	-	-	-	GO:0016020//membrane;GO:0016021//integral component of membrane	-	-
529	MSTRG.4040.1	Os01g0901950	-	Non-protein coding transcript	-	-	-	-	-	-	-
529	MSTRG.4040.1	Os01g0901900	-	S1, RNA binding domain containing protein	-	-	-	-	GO:0009507//chloroplast;GO:0009508//plastid chromosome	GO:0003676//nucleic acid binding	-
530	MSTRG.4055.1	Os01g0905700	-	Zinc finger, RING/FYVE/PHD-type domain containing protein	-	-	-	-	-	-	-
530	MSTRG.4055.1	Os01g0905800	AldC-1	Aldolase C-1	Metabolism;Metabolism;Metabolism;Metabolism;Metabolism;Metabolism;Metabolism;Metabolism	Global and overview maps;Global and overview maps;Global and overview maps;Global and overview maps;Carbohydrate metabolism;Energy metabolism;Carbohydrate metabolism;Carbohydrate metabolism	ko01100//Metabolic pathways;ko01110//Biosynthesis of secondary metabolites;ko01200//Carbon metabolism;ko01230//Biosynthesis of amino acids;ko00010//Glycolysis / Gluconeogenesis;ko00710//Carbon fixation in photosynthetic organisms;ko00051//Fructose and mannose metabolism;ko00030//Pentose phosphate pathway	K01623;K01623;K01623;K01623;K01623;K01623;K01623;K01623	GO:0005737//cytoplasm;GO:0005829//cytosol	GO:0003824//catalytic activity;GO:0004332//fructose-bisphosphate aldolase activity;GO:0016829//lyase activity	GO:0006094//gluconeogenesis;GO:0006096//glycolytic process;GO:0030388//fructose 1,6-bisphosphate metabolic process
530	MSTRG.4055.1	Os01g0906000	-	Similar to Ceramide glucosyltransferase	-	-	-	-	GO:0016020//membrane	GO:0008120//ceramide glucosyltransferase activity;GO:0016757//transferase activity, transferring glycosyl groups	GO:0006679//glucosylceramide biosynthetic process
530	MSTRG.4055.1	Os01g0906200	-	Similar to heat-intolerant 1	-	-	-	-	GO:0000938//GARP complex;GO:0005829//cytosol	-	GO:0042147//retrograde transport, endosome to Golgi
531	MSTRG.4057.1	MSTRG.4058	VPS53	PREDICTED: vacuolar protein sorting-associated protein 53 A-like [Camelina sativa]	-	-	-	-	GO:0031090//organelle membrane;GO:0043231//intracellular membrane-bounded organelle;GO:0043234//protein complex;GO:0044444//cytoplasmic part	GO:0005488//binding	GO:0007017//microtubule-based process;GO:0009408//response to heat;GO:0044802//single-organism membrane organization;GO:0048193//Golgi vesicle transport;GO:1902410//mitotic cytokinetic process
531	MSTRG.4057.1	Os01g0906200	-	Similar to heat-intolerant 1	-	-	-	-	GO:0000938//GARP complex;GO:0005829//cytosol	-	GO:0042147//retrograde transport, endosome to Golgi
532	MSTRG.4064.1	Os01g0907300	-	Hypothetical conserved gene	Metabolism;Metabolism	Global and overview maps;Glycan biosynthesis and metabolism	ko01100//Metabolic pathways;ko00563//Glycosylphosphatidylinositol(GPI)-anchor biosynthesis	K05291;K05291	GO:0005774//vacuolar membrane;GO:0005783//endoplasmic reticulum;GO:0042765//GPI-anchor transamidase complex	-	GO:0016255//attachment of GPI anchor to protein
532	MSTRG.4064.1	Os01g0907600	OsSAG12-1	Cysteine protease, Negative regulator of cell deat	-	-	-	-	GO:0005615//extracellular space;GO:0005764//lysosome	GO:0004197//cysteine-type endopeptidase activity;GO:0008233//peptidase activity;GO:0008234//cysteine-type peptidase activity;GO:0016787//hydrolase activity	GO:0006508//proteolysis;GO:0051603//proteolysis involved in cellular protein catabolic process
533	MSTRG.4067.3	Os01g0908001	-	Hypothetical gene	-	-	-	-	-	-	-
533	MSTRG.4067.3	Os01g0908200	OsBT	Member of the Bric-a-Brac/Tramtrack/Broad (BTB) family, BT1/BT2 ortholog, Negative regulation of nitrate uptake and nitrogen use efficienc	-	-	-	-	GO:0005634//nucleus	GO:0003712//transcription cofactor activity;GO:0004402//histone acetyltransferase activity;GO:0005515//protein binding;GO:0008270//zinc ion binding	GO:0006355//regulation of transcription, DNA-templated;GO:0016573//histone acetylation
533	MSTRG.4067.3	Os01g0908301	-	Non-protein coding transcript	-	-	-	-	-	-	-
533	MSTRG.4067.3	Os01g0908400	-	Conserved hypothetical protein	-	-	-	-	GO:0005747//mitochondrial respiratory chain complex I	-	-
534	MSTRG.4070.1	Os01g0908001	-	Hypothetical gene	-	-	-	-	-	-	-
534	MSTRG.4070.1	Os01g0908100	-	RabGAP/TBC domain containing protein	-	-	-	-	GO:0005623//cell	GO:0005096//GTPase activator activity;GO:0017137//Rab GTPase binding	GO:0006886//intracellular protein transport;GO:0090630//activation of GTPase activity
534	MSTRG.4070.1	Os01g0908400	-	Conserved hypothetical protein	-	-	-	-	GO:0005747//mitochondrial respiratory chain complex I	-	-
534	MSTRG.4070.1	Os01g0908500	OsMRS2-3	Mg2+ transporter protein, CorA-like domain containing protein	-	-	-	-	GO:0016020//membrane;GO:0016021//integral component of membrane	GO:0015095//magnesium ion transmembrane transporter activity	GO:0006811//ion transport;GO:0015693//magnesium ion transport;GO:1903830//magnesium ion transmembrane transport
535	MSTRG.4083.1	MSTRG.4080	--	Os09g0536133 [Oryza sativa Japonica Group]	-	-	-	-	-	-	-
535	MSTRG.4083.1	MSTRG.4082	--	3beta-hydroxysteroid-dehydrogenase/decarboxylase [Oryza sativa Japonica Group]	-	-	-	-	-	-	-
535	MSTRG.4083.1	MSTRG.4081	--	OSJNBb0078D11.8 [Oryza sativa Japonica Group]	-	-	-	-	-	GO:0097159//organic cyclic compound binding;GO:1901363//heterocyclic compound binding	-
536	MSTRG.4084.1	MSTRG.4082	--	3beta-hydroxysteroid-dehydrogenase/decarboxylase [Oryza sativa Japonica Group]	-	-	-	-	-	-	-
536	MSTRG.4084.1	MSTRG.4081	--	OSJNBb0078D11.8 [Oryza sativa Japonica Group]	-	-	-	-	-	GO:0097159//organic cyclic compound binding;GO:1901363//heterocyclic compound binding	-
537	MSTRG.4086.2	Os01g0910400	-	Similar to lysine ketoglutarate reductase trans-splicing related 1	-	-	-	-	GO:0016020//membrane;GO:0016021//integral component of membrane	-	-
537	MSTRG.4086.2	Os01g0910450	-	Non-protein coding transcript	-	-	-	-	-	-	-
537	MSTRG.4086.2	Os01g0910500	-	Conserved hypothetical protein	-	-	-	-	-	-	-
537	MSTRG.4086.2	Os01g0910900	-	Conserved hypothetical protein	-	-	-	-	-	-	-
537	MSTRG.4086.2	Os01g0911000	-	Sas10/Utp3/C1D domain containing protein	-	-	-	-	GO:0005730//nucleolus;GO:0032040//small-subunit processome	-	GO:0000462//maturation of SSU-rRNA from tricistronic rRNA transcript (SSU-rRNA, 5.8S rRNA, LSU-rRNA)
537	MSTRG.4086.2	Os01g0911100	OsRH30	Similar to DEAD box RNA helicase1	Genetic Information Processing	Transcription	ko03040//Spliceosome	K12823	-	GO:0000166//nucleotide binding;GO:0003676//nucleic acid binding;GO:0004386//helicase activity;GO:0005524//ATP binding;GO:0016787//hydrolase activity	-
538	MSTRG.4090.1	Os01g0910900	-	Conserved hypothetical protein	-	-	-	-	-	-	-
538	MSTRG.4090.1	Os01g0911000	-	Sas10/Utp3/C1D domain containing protein	-	-	-	-	GO:0005730//nucleolus;GO:0032040//small-subunit processome	-	GO:0000462//maturation of SSU-rRNA from tricistronic rRNA transcript (SSU-rRNA, 5.8S rRNA, LSU-rRNA)
538	MSTRG.4090.1	Os01g0911100	OsRH30	Similar to DEAD box RNA helicase1	Genetic Information Processing	Transcription	ko03040//Spliceosome	K12823	-	GO:0000166//nucleotide binding;GO:0003676//nucleic acid binding;GO:0004386//helicase activity;GO:0005524//ATP binding;GO:0016787//hydrolase activity	-
538	MSTRG.4090.1	Os01g0911133	-	Non-protein coding transcript	-	-	-	-	-	-	-
538	MSTRG.4090.1	Os01g0911250	-	Non-protein coding transcript	-	-	-	-	-	-	-
538	MSTRG.4090.1	Os01g0911300	OsABCB24	Similar to Transporter associated with antigen processing-like protein	Environmental Information Processing	Membrane transport	ko02010//ABC transporters	K05656	GO:0009507//chloroplast;GO:0009941//chloroplast envelope;GO:0016021//integral component of membrane	GO:0000166//nucleotide binding;GO:0005524//ATP binding;GO:0016887//ATPase activity;GO:0042626//ATPase activity, coupled to transmembrane movement of substances	GO:0055085//transmembrane transport
538	MSTRG.4090.1	Os01g0911200	-	Ribophorin II family protein	Metabolism;Genetic Information Processing;Metabolism;Metabolism	Global and overview maps;Folding, sorting and degradation;Glycan biosynthesis and metabolism;Glycan biosynthesis and metabolism	ko01100//Metabolic pathways;ko04141//Protein processing in endoplasmic reticulum;ko00510//N-Glycan biosynthesis;ko00513//Various types of N-glycan biosynthesis	K12667;K12667;K12667;K12667	GO:0005739//mitochondrion;GO:0005774//vacuolar membrane;GO:0005783//endoplasmic reticulum;GO:0005789//endoplasmic reticulum membrane;GO:0005794//Golgi apparatus;GO:0005886//plasma membrane;GO:0008250//oligosaccharyltransferase complex;GO:0009505//plant-type cell wall;GO:0009506//plasmodesma;GO:0016020//membrane;GO:0016021//integral component of membrane	GO:0016757//transferase activity, transferring glycosyl groups	GO:0006486//protein glycosylation;GO:0006487//protein N-linked glycosylation;GO:0009409//response to cold
539	MSTRG.4097.1	Os01g0912400	OsMADS97	Transcription factor, MADS-box domain containing protein	-	-	-	-	GO:0005634//nucleus	GO:0000976//transcription regulatory region sequence-specific DNA binding;GO:0000977//RNA polymerase II regulatory region sequence-specific DNA binding;GO:0000981//RNA polymerase II transcription factor activity, sequence-specific DNA binding;GO:0003677//DNA binding;GO:0008134//transcription factor binding;GO:0043565//sequence-specific DNA binding;GO:0044212//transcription regulatory region DNA b…	GO:0006357//regulation of transcription from RNA polymerase II promoter;GO:0007275//multicellular organism development
539	MSTRG.4097.1	Os01g0912600	-	Similar to SRD2 (SHOOT REDIFFERENTIATION DEFECTIVE 2); DNA binding	-	-	-	-	-	-	-
539	MSTRG.4097.1	Os01g0912700	-	Similar to T23K8.14 protein	-	-	-	-	GO:0009507//chloroplast;GO:0016020//membrane;GO:0016021//integral component of membrane	-	-
539	MSTRG.4097.1	MSTRG.4100	--	Os01g0912800 [Oryza sativa Japonica Group]	-	-	-	-	-	-	-
540	MSTRG.4108.1	Os01g0913600	-	Similar to Rho GDP-dissociation inhibitor 1 (Rho GDI-1) (AtRhoGDI1)	-	-	-	-	GO:0005737//cytoplasm;GO:0005829//cytosol;GO:0016020//membrane	GO:0005094//Rho GDP-dissociation inhibitor activity;GO:0048365//Rac GTPase binding	GO:0007266//Rho protein signal transduction;GO:0050790//regulation of catalytic activity
541	MSTRG.4126.1	Os01g0916350	-	Hypothetical gene	-	-	-	-	-	-	-
541	MSTRG.4126.1	Os01g0916400	Os	Similar to Selenium binding protein	Metabolism;Metabolism	Global and overview maps;Energy metabolism	ko01100//Metabolic pathways;ko00920//Sulfur metabolism	K17285;K17285	-	GO:0008430//selenium binding	-
541	MSTRG.4126.1	Os01g0916600	OsGRP1	RNA recognition motif, glycine rich protein domain containing protein	-	-	-	-	GO:0005739//mitochondrion;GO:1990904//ribonucleoprotein complex	GO:0003676//nucleic acid binding;GO:0003723//RNA binding;GO:0003729//mRNA binding	GO:0006397//mRNA processing;GO:0051252//regulation of RNA metabolic process;GO:0080156//mitochondrial mRNA modification
541	MSTRG.4126.1	Os01g0916700	-	Conserved hypothetical protein	-	-	-	-	-	-	-
541	MSTRG.4126.1	Os01g0916800	-	Similar to predicted protein	Genetic Information Processing;Genetic Information Processing	Transcription;Translation	ko03040//Spliceosome;ko03013//RNA transport	K12879;K12879	GO:0000347//THO complex;GO:0000445//THO complex part of transcription export complex;GO:0005634//nucleus;GO:0016607//nuclear speck	GO:0003723//RNA binding;GO:0003729//mRNA binding	GO:0006397//mRNA processing;GO:0006406//mRNA export from nucleus;GO:0035196//production of miRNAs involved in gene silencing by miRNA;GO:1990428//miRNA transport
541	MSTRG.4126.1	Os01g0916950	-	Hypothetical gene	-	-	-	-	-	-	-
542	MSTRG.4148.2	Os01g0920100	-	Conserved hypothetical protein	-	-	-	-	-	-	-
542	MSTRG.4148.2	Os01g0920300	-	Methyltransferase small domain containing protein	-	-	-	-	-	GO:0008168//methyltransferase activity;GO:0008173//RNA methyltransferase activity;GO:0016740//transferase activity	GO:0001510//RNA methylation;GO:0006396//RNA processing;GO:0032259//methylation
542	MSTRG.4148.2	Os01g0920400	OsDRP3A	Similar to Dynamin-related protein 3A (Dynamin-like protein 2) (Dynamin-like protein 2a). Splice isoform 2	-	-	-	-	GO:0005737//cytoplasm;GO:0016020//membrane	GO:0000166//nucleotide binding;GO:0003924//GTPase activity;GO:0005525//GTP binding;GO:0008017//microtubule binding	GO:0000266//mitochondrial fission;GO:0048285//organelle fission
543	MSTRG.4155.1	Os01g0921300	-	Exostosin-like family protein	-	-	-	-	-	GO:0016757//transferase activity, transferring glycosyl groups	GO:0006486//protein glycosylation
543	MSTRG.4155.1	Os01g0921400	OsEXO70F1	Conserved hypothetical protein	-	-	-	-	GO:0000145//exocyst	-	GO:0006887//exocytosis
543	MSTRG.4155.1	Os01g0921450	-	Hypothetical protein	-	-	-	-	-	-	-
543	MSTRG.4155.1	Os01g0921200	OsMOGS	Mannosyl-oligosaccharide glucosidase, N-glycan formation, Auxin-mediated root developmen	Metabolism;Genetic Information Processing;Metabolism	Global and overview maps;Folding, sorting and degradation;Glycan biosynthesis and metabolism	ko01100//Metabolic pathways;ko04141//Protein processing in endoplasmic reticulum;ko00510//N-Glycan biosynthesis	K01228;K01228;K01228	GO:0005789//endoplasmic reticulum membrane;GO:0016020//membrane;GO:0016021//integral component of membrane	GO:0003824//catalytic activity;GO:0004573//mannosyl-oligosaccharide glucosidase activity	GO:0006487//protein N-linked glycosylation;GO:0009311//oligosaccharide metabolic process
543	MSTRG.4155.1	Os01g0921500	OsCBSCBS2	Similar to SNF1-related protein kinase regulatory gamma subunit 1 (AKIN gamma1) (AKING1)	-	-	-	-	-	-	-
544	MSTRG.4160.1	Os01g0921300	-	Exostosin-like family protein	-	-	-	-	-	GO:0016757//transferase activity, transferring glycosyl groups	GO:0006486//protein glycosylation
544	MSTRG.4160.1	Os01g0921400	OsEXO70F1	Conserved hypothetical protein	-	-	-	-	GO:0000145//exocyst	-	GO:0006887//exocytosis
544	MSTRG.4160.1	Os01g0921450	-	Hypothetical protein	-	-	-	-	-	-	-
544	MSTRG.4160.1	Os01g0921550	-	Hypothetical protein	-	-	-	-	-	-	-
544	MSTRG.4160.1	Os01g0921600	-	Similar to Mitochondrial import receptor subunit TOM20 (Translocase of outer membrane 20 kDa subunit)	-	-	-	-	GO:0005739//mitochondrion;GO:0005741//mitochondrial outer membrane;GO:0005742//mitochondrial outer membrane translocase complex;GO:0016020//membrane;GO:0016021//integral component of membrane	GO:0005515//protein binding	GO:0015031//protein transport;GO:0045040//protein import into mitochondrial outer membrane
545	MSTRG.4168.1	MSTRG.4166	--	squamosa promoter-binding-like protein 2 [Oryza sativa Japonica Group]	-	-	-	-	-	-	-
545	MSTRG.4168.1	Os01g0922700	-	Conserved hypothetical protein	-	-	-	-	-	-	-
545	MSTRG.4168.1	Os01g0922800	MADS51	MADS-box transcription factor, Short-day flowering promote	-	-	-	-	GO:0005634//nucleus	GO:0000976//transcription regulatory region sequence-specific DNA binding;GO:0000977//RNA polymerase II regulatory region sequence-specific DNA binding;GO:0000981//RNA polymerase II transcription factor activity, sequence-specific DNA binding;GO:0003677//DNA binding;GO:0008134//transcription factor binding;GO:0043565//sequence-specific DNA binding;GO:0044212//transcription regulatory region DNA b…	GO:0007275//multicellular organism development;GO:0009908//flower development;GO:0045944//positive regulation of transcription from RNA polymerase II promoter;GO:0048576//positive regulation of short-day photoperiodism, flowering
546	MSTRG.4170.1	Os01g0922600	OsSPL2	Similar to SBP-domain protein 4	-	-	-	-	GO:0005634//nucleus	GO:0003677//DNA binding;GO:0046872//metal ion binding	-
546	MSTRG.4170.1	Os01g0922700	-	Conserved hypothetical protein	-	-	-	-	-	-	-
547	MSTRG.4174.1	Os01g0923000	-	Conserved hypothetical protein	-	-	-	-	GO:0016020//membrane;GO:0016021//integral component of membrane	-	-
547	MSTRG.4174.1	Os01g0923200	-	Similar to AT.I.24-6 protein (Fragment)	-	-	-	-	GO:0016020//membrane;GO:0016021//integral component of membrane	-	-
547	MSTRG.4174.1	MSTRG.4176	--	OSJNBb0103I08.14 [Oryza sativa Japonica Group]	-	-	-	-	-	-	-
547	MSTRG.4174.1	Os01g0922800	MADS51	MADS-box transcription factor, Short-day flowering promote	-	-	-	-	GO:0005634//nucleus	GO:0000976//transcription regulatory region sequence-specific DNA binding;GO:0000977//RNA polymerase II regulatory region sequence-specific DNA binding;GO:0000981//RNA polymerase II transcription factor activity, sequence-specific DNA binding;GO:0003677//DNA binding;GO:0008134//transcription factor binding;GO:0043565//sequence-specific DNA binding;GO:0044212//transcription regulatory region DNA b…	GO:0007275//multicellular organism development;GO:0009908//flower development;GO:0045944//positive regulation of transcription from RNA polymerase II promoter;GO:0048576//positive regulation of short-day photoperiodism, flowering
547	MSTRG.4174.1	Os01g0923300	OsCBSCBSPB1	Cystathionine beta-synthase, core domain containing protein	-	-	-	-	-	-	-
548	MSTRG.4176.1	Os01g0923000	-	Conserved hypothetical protein	-	-	-	-	GO:0016020//membrane;GO:0016021//integral component of membrane	-	-
548	MSTRG.4176.1	Os01g0923200	-	Similar to AT.I.24-6 protein (Fragment)	-	-	-	-	GO:0016020//membrane;GO:0016021//integral component of membrane	-	-
548	MSTRG.4176.1	Os01g0923400	-	Hypothetical conserved gene	-	-	-	-	GO:0016020//membrane;GO:0016021//integral component of membrane	-	-
548	MSTRG.4176.1	Os01g0923300	OsCBSCBSPB1	Cystathionine beta-synthase, core domain containing protein	-	-	-	-	-	-	-
549	MSTRG.4178.1	MSTRG.4176	--	OSJNBb0103I08.14 [Oryza sativa Japonica Group]	-	-	-	-	-	-	-
549	MSTRG.4178.1	Os01g0923300	OsCBSCBSPB1	Cystathionine beta-synthase, core domain containing protein	-	-	-	-	-	-	-
549	MSTRG.4178.1	Os01g0923600	CAMTA	Hypothetical conserved gene	-	-	-	-	GO:0005634//nucleus	GO:0001228//transcriptional activator activity, RNA polymerase II transcription regulatory region sequence-specific binding;GO:0003677//DNA binding;GO:0005515//protein binding;GO:0043565//sequence-specific DNA binding	GO:0045944//positive regulation of transcription from RNA polymerase II promoter
550	MSTRG.4207.1	Os01g0926800	-	Cellular retinaldehyde-binding/triple function, N-terminal domain containing protein	-	-	-	-	-	-	-
550	MSTRG.4207.1	MSTRG.4208	ASR3	P0482D04.22 [Oryza sativa Japonica Group]	-	-	-	-	-	-	-
551	MSTRG.4210.1	Os01g0927000	SDG714	Similar to SET domain-containing protein SET118	Metabolism;Metabolism	Global and overview maps;Amino acid metabolism	ko01100//Metabolic pathways;ko00310//Lysine degradation	K11420;K11420	GO:0005634//nucleus;GO:0005694//chromosome	GO:0005515//protein binding;GO:0008270//zinc ion binding;GO:0008327//methyl-CpG binding;GO:0010385//double-stranded methylated DNA binding;GO:0010428//methyl-CpNpG binding;GO:0010429//methyl-CpNpN binding;GO:0018024//histone-lysine N-methyltransferase activity;GO:0046974//histone methyltransferase activity (H3-K9 specific)	GO:0010216//maintenance of DNA methylation;GO:0016571//histone methylation;GO:0018022//peptidyl-lysine methylation;GO:0034968//histone lysine methylation;GO:0051567//histone H3-K9 methylation
551	MSTRG.4210.1	Os01g0927400	-	Molecular chaperone, heat shock protein, Hsp40, DnaJ domain containing protein	-	-	-	-	-	-	-
551	MSTRG.4210.1	MSTRG.4208	ASR3	P0482D04.22 [Oryza sativa Japonica Group]	-	-	-	-	-	-	-
551	MSTRG.4210.1	Os01g0927500	-	Serine/threonine protein kinase-related domain containing protein	-	-	-	-	GO:0005886//plasma membrane;GO:0016020//membrane;GO:0016021//integral component of membrane	GO:0004672//protein kinase activity;GO:0004675//transmembrane receptor protein serine/threonine kinase activity;GO:0005102//receptor binding;GO:0005524//ATP binding;GO:0033612//receptor serine/threonine kinase binding	GO:0006468//protein phosphorylation;GO:0007178//transmembrane receptor protein serine/threonine kinase signaling pathway;GO:0009909//regulation of flower development;GO:0010075//regulation of meristem growth
552	MSTRG.4213.1	Os01g0927400	-	Molecular chaperone, heat shock protein, Hsp40, DnaJ domain containing protein	-	-	-	-	-	-	-
[truncated: 11,024 more rows]

## Sheet: miRNA-mRNA
miRNA_Index	miR_name	miR_seq	Transcript	Symbol	Transcript Annotation	GO Component	GO Function	GO Process	Pathway
[truncated: 35,044 more rows]

## Sheet: mRNA-lncRNA in the turquoise
mRNAs-miRNAs pairs with the genes in the turquoise module of WGCNA.
mRNA_ID	miRNA_ID	Module	ZJ22a1	ZJ22a2	ZJ22a3	ZJ22b1	ZJ22b2	ZJ22b3	ZJ22c1	ZJ22c2	ZJ22c3	Pir1a1	Pir1a2	Pir1a3	Pir1b1	Pir1b2	Pir1b3	Pir1c1	Pir1c2	Pir1c3	Symbol	Description	KEGG_A_class	KEGG_B_class	Pathway	K_ID	GO Component	GO Function	GO Process	TF_family
[truncated: 3,391 more rows]

## Sheet: miRNA-mRNA in the turquoise
mRNAs-miRNAs pairs with the genes in the turquoise module of WGCNA.
[truncated: 191 more rows]
