# Supplementary material for: Whole-Transcriptome Analysis Reveals Autophagy Is Involved in Early Senescence of zj-es Mutant Rice
Source: Front Plant Sci. 2022 Jun 3;13:899054. doi: 10.3389/fpls.2022.899054 (PMC9204060; doi:10.3389/fpls.2022.899054)
Supplement: Supplementary file 10 [file Table_10.XLSX]

## Sheet:  ZJ22a-vs-zj-esa
All significantly expressed genes between ZJ22a and zj-esa.
id	ZJ22a1_count	ZJ22a2_count	ZJ22a3_count	zj-esa1_count	zj-esa2_count	zj-esa3_count	ZJ22a1_fpkm	ZJ22a2_fpkm	ZJ22a3_fpkm	zj-esa1_fpkm	zj-esa2_fpkm	zj-esa3_fpkm	ZJ22a_mean	zj-esa_mean	log2(fc)	PValue	FDR	Symbol	Description	KEGG_A_class	KEGG_B_class	Pathway	K_ID	GO Component	GO Function	GO Process
Os02g0720600	90	20	68	2121	2924	2109	1.54	0.31	1.13	33.43	48.31	42.07	0.993333	41.27	5.37667	5.53544e-47	1.1057e-42	-	Peptidase A1 domain containing protein	-	-	-	-	-	GO:0004190//aspartic-type endopeptidase activity;GO:0008233//peptidase activity;GO:0016787//hydrolase activity	GO:0006508//proteolysis;GO:0030163//protein catabolic process
Os01g0940700	36	3	22	2171	1789	1659	0.82	0.06	0.49	45.82	39.58	44.31	0.456667	43.2367	6.56497	3.35278e-44	3.34859e-40	OsPR2	Similar to Glucan endo-1,3-beta-glucosidase GII precursor (EC 3.2.1.39) ((1->3)- beta-glucan endohydrolase GII) ((1->3)-beta-glucanase isoenzyme GII) (Beta-1,3-endoglucanase GII)	-	-	-	-	GO:0046658//anchored component of plasma membrane	GO:0004553//hydrolase activity, hydrolyzing O-glycosyl compounds;GO:0016787//hydrolase activity;GO:0016798//hydrolase activity, acting on glycosyl bonds	GO:0005975//carbohydrate metabolic process;GO:0008152//metabolic process
Os01g0713200	90	19	97	4471	8993	4321	2.27	0.44	2.37	103.97	219.19	127.17	1.69333	150.11	6.47001	1.52438e-42	1.01498e-38	Gns10	Similar to Beta-glucanase	-	-	-	-	GO:0046658//anchored component of plasma membrane	GO:0004553//hydrolase activity, hydrolyzing O-glycosyl compounds;GO:0016787//hydrolase activity;GO:0016798//hydrolase activity, acting on glycosyl bonds	GO:0005975//carbohydrate metabolic process;GO:0008152//metabolic process
Os04g0373400	24	8	29	1045	797	948	0.36	0.11	0.43	14.6	11.67	16.77	0.3	14.3467	5.57961	2.92707e-37	1.46171e-33	-	Similar to MATE efflux family protein, expressed	-	-	-	-	GO:0016020//membrane;GO:0016021//integral component of membrane	GO:0015238//drug transmembrane transporter activity;GO:0015297//antiporter activity;GO:0022857//transmembrane transporter activity;GO:0042910//xenobiotic transporter activity	GO:0006855//drug transmembrane transport;GO:0042908//xenobiotic transport;GO:0055085//transmembrane transport
Os01g0382000	19	6	38	5629	1526	4992	0.69	0.2	1.33	187.05	53.15	209.93	0.74	150.043	7.66364	8.81391e-33	3.52116e-29	OsPR1b	Similar to Pathogenesis-related protein PRB1-2 precursor	Organismal Systems;Environmental Information Processing;Environmental Information Processing	Environmental adaptation;Signal transduction;Signal transduction	ko04626//Plant-pathogen interaction;ko04075//Plant hormone signal transduction;ko04016//MAPK signaling pathway - plant	K13449;K13449;K13449	GO:0005576//extracellular region;GO:0005615//extracellular space	-	-
Os03g0157900	189	103	178	2371	2077	2459	3.38	1.69	3.08	39.06	35.86	51.27	2.71667	42.0633	3.95265	5.72201e-31	1.90495e-27	-	Phosphoserine aminotransferase, chloroplast precursor (EC 2.6.1.52) (PSAT)	Metabolism;Metabolism;Metabolism;Metabolism;Metabolism;Metabolism;Metabolism	Global and overview maps;Global and overview maps;Global and overview maps;Global and overview maps;Amino acid metabolism;Amino acid metabolism;Metabolism of cofactors and vitamins	ko01100//Metabolic pathways;ko01110//Biosynthesis of secondary metabolites;ko01200//Carbon metabolism;ko01230//Biosynthesis of amino acids;ko00270//Cysteine and methionine metabolism;ko00260//Glycine, serine and threonine metabolism;ko00750//Vitamin B6 metabolism	K00831;K00831;K00831;K00831;K00831;K00831;K00831	GO:0005737//cytoplasm;GO:0009570//chloroplast stroma	GO:0003824//catalytic activity;GO:0004648//O-phospho-L-serine:2-oxoglutarate aminotransferase activity;GO:0008483//transaminase activity;GO:0016740//transferase activity	GO:0006564//L-serine biosynthetic process;GO:0008652//cellular amino acid biosynthetic process
Os07g0631700	21	20	27	875	1030	689	0.68	0.59	0.84	26.04	32.13	25.95	0.703333	28.04	5.31713	2.57192e-28	7.0324e-25	-	EF-Hand type domain containing protein	-	-	-	-	GO:0016020//membrane;GO:0016021//integral component of membrane	GO:0005509//calcium ion binding	-
MSTRG.2635	63	29	56	772	773	868	1.4	0.59	1.21	15.84	16.62	22.54	1.06667	18.3333	4.10329	2.81648e-28	7.0324e-25	ABCB11	ABC transporter B family member 11 isoform X2 [Oryza sativa Japonica Group]	Environmental Information Processing	Membrane transport	ko02010//ABC transporters	K05658	GO:0016020//membrane	GO:0015405//P-P-bond-hydrolysis-driven transmembrane transporter activity;GO:0016887//ATPase activity	GO:0044763//single-organism cellular process;GO:0044765//single-organism transport
Os09g0485900	388	191	428	4164	6147	4114	13.03	5.89	13.91	128.81	199.33	161.07	10.9433	163.07	3.89737	4.54962e-28	1.00976e-24	-	Similar to 60S ribosomal protein L9 (Gibberellin-regulated protein GA)	Genetic Information Processing	Translation	ko03010//Ribosome	K02940	GO:0005840//ribosome;GO:0022625//cytosolic large ribosomal subunit	GO:0003735//structural constituent of ribosome;GO:0019843//rRNA binding	GO:0002181//cytoplasmic translation;GO:0006412//translation
Os08g0543400	5	0	6	454	486	466	0.11	0	0.1	6.94	7.91	9.18	0.07	8.01	6.8383	7.05182e-28	1.4086e-24	-	Transferase family protein	Metabolism;Metabolism;Metabolism;Metabolism;Metabolism	Global and overview maps;Global and overview maps;Biosynthesis of other secondary metabolites;Biosynthesis of other secondary metabolites;Biosynthesis of other secondary metabolites	ko01100//Metabolic pathways;ko01110//Biosynthesis of secondary metabolites;ko00940//Phenylpropanoid biosynthesis;ko00941//Flavonoid biosynthesis;ko00945//Stilbenoid, diarylheptanoid and gingerol biosynthesis	K13065;K13065;K13065;K13065;K13065	-	GO:0016747//transferase activity, transferring acyl groups other than amino-acyl groups	-
Os07g0677500	45	6	18	1161	821	1384	1.01	0.12	0.39	24.09	17.85	36.34	0.506667	26.0933	5.6865	8.02891e-27	1.45798e-23	POX3006	Similar to Peroxidase precursor (EC 1.11.1.7)	Metabolism;Metabolism;Metabolism	Global and overview maps;Global and overview maps;Biosynthesis of other secondary metabolites	ko01100//Metabolic pathways;ko01110//Biosynthesis of secondary metabolites;ko00940//Phenylpropanoid biosynthesis	K00430;K00430;K00430	GO:0005576//extracellular region	GO:0004601//peroxidase activity;GO:0016491//oxidoreductase activity;GO:0020037//heme binding;GO:0046872//metal ion binding	GO:0006979//response to oxidative stress;GO:0042744//hydrogen peroxide catabolic process;GO:0055114//oxidation-reduction process;GO:0098869//cellular oxidant detoxification
Os08g0447000	215	63	159	2037	1866	2616	2.84	0.76	2.03	24.81	23.82	40.33	1.87667	29.6533	3.98195	1.88119e-26	3.1314e-23	-	Similar to D-3-phosphoglycerate dehydrogenase	Metabolism;Metabolism;Metabolism;Metabolism;Metabolism;Metabolism	Global and overview maps;Global and overview maps;Global and overview maps;Global and overview maps;Amino acid metabolism;Amino acid metabolism	ko01100//Metabolic pathways;ko01110//Biosynthesis of secondary metabolites;ko01200//Carbon metabolism;ko01230//Biosynthesis of amino acids;ko00270//Cysteine and methionine metabolism;ko00260//Glycine, serine and threonine metabolism	K00058;K00058;K00058;K00058;K00058;K00058	GO:0009570//chloroplast stroma	GO:0004617//phosphoglycerate dehydrogenase activity;GO:0016491//oxidoreductase activity;GO:0016616//oxidoreductase activity, acting on the CH-OH group of donors, NAD or NADP as acceptor;GO:0051287//NAD binding	GO:0006520//cellular amino acid metabolic process;GO:0006564//L-serine biosynthetic process;GO:0008652//cellular amino acid biosynthetic process;GO:0055114//oxidation-reduction process
Os03g0264400	68	12	50	1056	1077	886	1.11	0.15	0.76	14.78	16.1	16.59	0.673333	15.8233	4.55459	2.05021e-26	3.15023e-23	OASA2	Anthranilate synthase alpha 2 subunit	Metabolism;Metabolism;Metabolism;Metabolism	Global and overview maps;Global and overview maps;Global and overview maps;Amino acid metabolism	ko01100//Metabolic pathways;ko01110//Biosynthesis of secondary metabolites;ko01230//Biosynthesis of amino acids;ko00400//Phenylalanine, tyrosine and tryptophan biosynthesis	K01657;K01657;K01657;K01657	GO:0005950//anthranilate synthase complex;GO:0009507//chloroplast;GO:0009536//plastid	GO:0004049//anthranilate synthase activity;GO:0016829//lyase activity	GO:0000162//tryptophan biosynthetic process;GO:0008652//cellular amino acid biosynthetic process;GO:0009058//biosynthetic process;GO:0009073//aromatic amino acid family biosynthetic process
Os08g0130500	597	212	619	4771	6280	5162	16.44	7.36	18.76	116.26	179.55	163.03	14.1867	152.947	3.43042	2.92796e-26	4.17758e-23	YK704	60S acidic ribosomal protein P0	Genetic Information Processing	Translation	ko03010//Ribosome	K02941	GO:0005840//ribosome;GO:0022625//cytosolic large ribosomal subunit	GO:0003735//structural constituent of ribosome;GO:0070180//large ribosomal subunit rRNA binding	GO:0000027//ribosomal large subunit assembly;GO:0002181//cytoplasmic translation;GO:0042254//ribosome biogenesis
Os04g0650800	72	24	96	1504	1516	1072	1.76	0.31	2.07	26.19	29.11	25.06	1.38	26.7867	4.27877	1.20556e-24	1.6054e-21	-	Similar to Phosphoglycerate dehydrogenase	Metabolism;Metabolism;Metabolism;Metabolism;Metabolism;Metabolism	Global and overview maps;Global and overview maps;Global and overview maps;Global and overview maps;Amino acid metabolism;Amino acid metabolism	ko01100//Metabolic pathways;ko01110//Biosynthesis of secondary metabolites;ko01200//Carbon metabolism;ko01230//Biosynthesis of amino acids;ko00270//Cysteine and methionine metabolism;ko00260//Glycine, serine and threonine metabolism	K00058;K00058;K00058;K00058;K00058;K00058	GO:0009570//chloroplast stroma	GO:0004617//phosphoglycerate dehydrogenase activity;GO:0016491//oxidoreductase activity;GO:0016616//oxidoreductase activity, acting on the CH-OH group of donors, NAD or NADP as acceptor;GO:0051287//NAD binding	GO:0006520//cellular amino acid metabolic process;GO:0006564//L-serine biosynthetic process;GO:0008652//cellular amino acid biosynthetic process;GO:0055114//oxidation-reduction process
Os08g0140300	0	2	9	1487	542	1403	0	0.03	0.14	21.79	8.33	26.03	0.0566667	18.7167	8.36761	3.08537e-24	3.85189e-21	TDC1	Aromatic L-amino acid decarboxylase (AADC), Senescence-induced serotonin biosynthesi	Metabolism;Metabolism;Metabolism;Metabolism;Metabolism;Metabolism;Metabolism;Metabolism	Global and overview maps;Global and overview maps;Amino acid metabolism;Amino acid metabolism;Amino acid metabolism;Biosynthesis of other secondary metabolites;Biosynthesis of other secondary metabolites;Biosynthesis of other secondary metabolites	ko01100//Metabolic pathways;ko01110//Biosynthesis of secondary metabolites;ko00380//Tryptophan metabolism;ko00360//Phenylalanine metabolism;ko00350//Tyrosine metabolism;ko00950//Isoquinoline alkaloid biosynthesis;ko00965//Betalain biosynthesis;ko00901//Indole alkaloid biosynthesis	K01593;K01593;K01593;K01593;K01593;K01593;K01593;K01593	-	GO:0003824//catalytic activity;GO:0016829//lyase activity;GO:0016831//carboxy-lyase activity;GO:0030170//pyridoxal phosphate binding;GO:0036469//L-tryptophan decarboxylase activity	GO:0006520//cellular amino acid metabolic process;GO:0006587//serotonin biosynthetic process from tryptophan;GO:0019752//carboxylic acid metabolic process;GO:0042427//serotonin biosynthetic process
Os12g0491800	3	3	12	1426	436	1881	0.03	0.03	0.12	13.88	4.45	23.17	0.06	13.8333	7.84897	9.74133e-24	1.10225e-20	OsKSL10	Similar to Ent-kaurene synthase 1A	Metabolism;Metabolism	Global and overview maps;Metabolism of terpenoids and polyketides	ko01110//Biosynthesis of secondary metabolites;ko00904//Diterpenoid biosynthesis	K14037;K14037	-	GO:0000287//magnesium ion binding;GO:0010333//terpene synthase activity;GO:0016829//lyase activity;GO:0034280//ent-sandaracopimaradiene synthase activity;GO:0046872//metal ion binding	GO:0006952//defense response;GO:0016102//diterpenoid biosynthetic process
Os04g0206700	56	22	45	546	772	645	0.98	0.35	0.76	8.85	13.07	13.19	0.696667	11.7033	4.07031	9.93267e-24	1.10225e-20	-	UDP-glucuronosyl/UDP-glucosyltransferase family protein	-	-	-	-	GO:0043231//intracellular membrane-bounded organelle	GO:0008194//UDP-glycosyltransferase activity;GO:0016740//transferase activity;GO:0016757//transferase activity, transferring glycosyl groups;GO:0016758//transferase activity, transferring hexosyl groups;GO:0080043//quercetin 3-O-glucosyltransferase activity;GO:0080044//quercetin 7-O-glucosyltransferase activity	-
Os02g0570400	3	3	14	1540	441	1572	0.03	0.03	0.13	13.76	4.13	17.77	0.0633333	11.8867	7.55216	7.64374e-23	8.03598e-20	OsKS7	Similar to Ent-kaurene synthase 1A	Metabolism;Metabolism	Global and overview maps;Metabolism of terpenoids and polyketides	ko01110//Biosynthesis of secondary metabolites;ko00904//Diterpenoid biosynthesis	K14036;K14036	-	GO:0000287//magnesium ion binding;GO:0010333//terpene synthase activity;GO:0016829//lyase activity;GO:0034277//ent-cassa-12,15-diene synthase activity;GO:0046872//metal ion binding	GO:0006952//defense response;GO:0016102//diterpenoid biosynthetic process
Os08g0509100	50	16	144	4065	3750	3351	0.46	0.14	1.29	34.89	33.66	36.54	0.63	35.03	5.7971	1.06155e-22	1.06023e-19	OsLOX8	Similar to Lipoxygenase, chloroplast precursor (EC 1.13.11.12)	Metabolism;Metabolism;Metabolism;Metabolism	Global and overview maps;Global and overview maps;Lipid metabolism;Lipid metabolism	ko01100//Metabolic pathways;ko01110//Biosynthesis of secondary metabolites;ko00592//alpha-Linolenic acid metabolism;ko00591//Linoleic acid metabolism	K00454;K00454;K00454;K00454	GO:0009507//chloroplast;GO:0009536//plastid	GO:0005515//protein binding;GO:0016165//linoleate 13S-lipoxygenase activity;GO:0016491//oxidoreductase activity;GO:0016702//oxidoreductase activity, acting on single donors with incorporation of molecular oxygen, incorporation of two atoms of oxygen;GO:0046872//metal ion binding;GO:0051213//dioxygenase activity	GO:0006629//lipid metabolic process;GO:0006631//fatty acid metabolic process;GO:0006633//fatty acid biosynthetic process;GO:0031408//oxylipin biosynthetic process;GO:0034440//lipid oxidation;GO:0055114//oxidation-reduction process
Os03g0194900	95	21	60	802	1033	1009	2	0.38	1.16	15.17	19.99	23.53	1.18	19.5633	4.05129	1.24246e-22	1.18181e-19	-	Uncharacterised conserved protein UCP037471 domain containing protein	-	-	-	-	GO:0016020//membrane;GO:0016021//integral component of membrane	GO:0046872//metal ion binding	GO:0055114//oxidation-reduction process
Os07g0522500	22	7	17	484	406	787	0.39	0.12	0.29	7.84	6.9	16.16	0.266667	10.3	5.27146	3.90255e-22	3.41795e-19	ABCG43	Similar to PDR6 ABC transporter	-	-	-	-	GO:0016020//membrane	GO:0005524//ATP binding;GO:0016887//ATPase activity	-
Os07g0180900	139	41	123	1193	1562	1104	2.78	0.75	2.38	21.96	30.13	25.71	1.97	25.9333	3.71854	3.93556e-22	3.41795e-19	-	Similar to 60S ribosomal protein L4	Genetic Information Processing	Translation	ko03010//Ribosome	K02930	GO:0005840//ribosome;GO:0022625//cytosolic large ribosomal subunit	GO:0003723//RNA binding;GO:0003735//structural constituent of ribosome	GO:0006412//translation
Os12g0217800	2	1	9	690	341	784	0.08	0.04	0.36	26.5	13.73	38.11	0.16	26.1133	7.35057	5.11965e-22	4.26104e-19	-	Hypothetical gene	-	-	-	-	-	-	-
Os01g0742400	110	41	94	852	1068	800	0.96	0.35	0.8	6.62	8.72	8.28	0.703333	7.87333	3.48469	2.22817e-21	1.7803e-18	-	Hypothetical conserved gene	-	-	-	-	GO:0005886//plasma membrane;GO:0016020//membrane;GO:0016021//integral component of membrane	GO:0000166//nucleotide binding;GO:0004672//protein kinase activity;GO:0004674//protein serine/threonine kinase activity;GO:0005515//protein binding;GO:0005524//ATP binding;GO:0016301//kinase activity;GO:0016740//transferase activity	GO:0006468//protein phosphorylation;GO:0016310//phosphorylation
Os05g0207300	64	35	76	695	936	777	2.08	1.04	2.39	20.77	29.32	29.39	1.83667	26.4933	3.85047	3.54895e-21	2.72655e-18	OsRPL5	Similar to 60S ribosomal protein L11-2 (L16). Splice isoform 2	Genetic Information Processing	Translation	ko03010//Ribosome	K02868	GO:0005634//nucleus;GO:0005737//cytoplasm;GO:0005840//ribosome;GO:0022625//cytosolic large ribosomal subunit	GO:0003723//RNA binding;GO:0003735//structural constituent of ribosome;GO:0019843//rRNA binding	GO:0000027//ribosomal large subunit assembly;GO:0006412//translation
Os01g0824800	43	14	54	649	822	580	0.86	0.26	1.04	11.92	15.82	13.48	0.72	13.74	4.25424	6.3704e-21	4.71292e-18	-	Conserved hypothetical protein	-	-	-	-	GO:0016020//membrane;GO:0016021//integral component of membrane	-	-
Os06g0697600	12	4	20	491	441	347	0.19	0.06	0.3	7.1	6.68	6.35	0.183333	6.71	5.19377	6.70276e-21	4.7817e-18	-	ATPase, AAA-type, core domain containing protein	-	-	-	-	-	GO:0000166//nucleotide binding;GO:0005524//ATP binding	-
Os03g0213100	246	71	227	1754	2693	2086	3.71	0.98	3.31	26.01	41.21	38.22	2.66667	35.1467	3.72028	1.2005e-20	8.26895e-18	-	Similar to Sec61p	Genetic Information Processing;Cellular Processes;Genetic Information Processing	Folding, sorting and degradation;Transport and catabolism;Folding, sorting and degradation	ko04141//Protein processing in endoplasmic reticulum;ko04145//Phagosome;ko03060//Protein export	K10956;K10956;K10956	GO:0005783//endoplasmic reticulum;GO:0005784//Sec61 translocon complex;GO:0005789//endoplasmic reticulum membrane;GO:0016020//membrane;GO:0016021//integral component of membrane	GO:0005048//signal sequence binding;GO:0008320//protein transmembrane transporter activity;GO:0043022//ribosome binding	GO:0006616//SRP-dependent cotranslational protein targeting to membrane, translocation;GO:0006620//posttranslational protein targeting to membrane;GO:0015031//protein transport;GO:0031204//posttranslational protein targeting to membrane, translocation
Os02g0625500	205	68	180	1334	1323	1320	4.57	1.41	3.92	28.8	28.45	35.44	3.3	30.8967	3.22691	4.78124e-20	3.18351e-17	-	Similar to Adenosine kinase-like protein (Fragment)	Metabolism;Metabolism	Global and overview maps;Nucleotide metabolism	ko01100//Metabolic pathways;ko00230//Purine metabolism	K00856;K00856	GO:0005634//nucleus;GO:0005829//cytosol	GO:0004001//adenosine kinase activity;GO:0016773//phosphotransferase activity, alcohol group as acceptor	GO:0006166//purine ribonucleoside salvage;GO:0006167//AMP biosynthetic process
Os04g0171800	933	258	680	113	41	98	8.36	2.12	5.9	0.93	0.36	1.02	5.46	0.77	-2.82597	1.6882e-19	1.0878e-16	-	Similar to Cytochrome P450 79A1 (EC 1.14.13.41) (Tyrosine N-monooxygenase) (Cytochrome P450Tyr)	Metabolism;Metabolism;Metabolism;Metabolism;Metabolism	Global and overview maps;Global and overview maps;Metabolism of other amino acids;Global and overview maps;Biosynthesis of other secondary metabolites	ko01100//Metabolic pathways;ko01110//Biosynthesis of secondary metabolites;ko00460//Cyanoamino acid metabolism;ko01210//2-Oxocarboxylic acid metabolism;ko00966//Glucosinolate biosynthesis	K12153;K12153;K12153;K12153;K12153	GO:0016020//membrane;GO:0016021//integral component of membrane	GO:0004497//monooxygenase activity;GO:0005506//iron ion binding;GO:0016491//oxidoreductase activity;GO:0016705//oxidoreductase activity, acting on paired donors, with incorporation or reduction of molecular oxygen;GO:0016709//oxidoreductase activity, acting on paired donors, with incorporation or reduction of molecular oxygen, NAD(P)H as one donor, and incorporation of one atom of oxygen;GO:00200…	GO:0055114//oxidation-reduction process
Os12g0235800	33	18	25	387	447	433	0.65	0.31	0.41	16.17	13.31	21.06	0.456667	16.8467	5.20518	1.92815e-19	1.20359e-16	-	Similar to Argininosuccinate synthase (Fragment)	Metabolism;Metabolism;Metabolism;Metabolism;Metabolism	Global and overview maps;Global and overview maps;Global and overview maps;Amino acid metabolism;Amino acid metabolism	ko01100//Metabolic pathways;ko01110//Biosynthesis of secondary metabolites;ko01230//Biosynthesis of amino acids;ko00250//Alanine, aspartate and glutamate metabolism;ko00220//Arginine biosynthesis	K01940;K01940;K01940;K01940;K01940	GO:0005737//cytoplasm	GO:0004055//argininosuccinate synthase activity;GO:0005524//ATP binding	GO:0000050//urea cycle;GO:0000053//argininosuccinate metabolic process;GO:0006526//arginine biosynthetic process
Os10g0416500	91	13	123	2221	2368	1922	2.53	0.33	3.31	56.82	63.49	62.23	2.05667	60.8467	4.8868	2.07871e-19	1.25825e-16	Oschib1	Similar to Chitinase 1 precursor (EC 3.2.1.14) (Tulip bulb chitinase-1) (TBC-1)	-	-	-	-	-	GO:0004553//hydrolase activity, hydrolyzing O-glycosyl compounds;GO:0016787//hydrolase activity;GO:0016798//hydrolase activity, acting on glycosyl bonds	GO:0005975//carbohydrate metabolic process;GO:0008152//metabolic process
Os03g0599800	782	289	739	4742	5491	4071	15.39	5.22	14.07	85.94	104.3	93.37	11.56	94.5367	3.03173	3.06642e-19	1.80152e-16	OsUAM1	Reversibly glycosylated polypeptide	Metabolism;Metabolism	Global and overview maps;Carbohydrate metabolism	ko01100//Metabolic pathways;ko00520//Amino sugar and nucleotide sugar metabolism	K13379;K13379	GO:0005794//Golgi apparatus;GO:0005829//cytosol	GO:0005515//protein binding;GO:0016853//isomerase activity;GO:0016866//intramolecular transferase activity;GO:0052691//UDP-arabinopyranose mutase activity	GO:0009832//plant-type cell wall biogenesis;GO:0033356//UDP-L-arabinose metabolic process;GO:0071555//cell wall organization;GO:0071669//plant-type cell wall organization or biogenesis
Os01g0609900	25	18	84	1663	1324	1415	0.16	0.11	0.54	10.08	8.45	10.85	0.27	9.79333	5.18077	7.03468e-19	4.01479e-16	OsPDR8	Similar to Pleiotropic drug resistance protein 4	-	-	-	-	GO:0016020//membrane;GO:0016021//integral component of membrane	GO:0000166//nucleotide binding;GO:0005524//ATP binding;GO:0016887//ATPase activity	-
Os02g0105900	246	74	290	2262	2917	2188	7.19	1.98	8.2	60.89	82.29	74.53	5.79	72.57	3.64774	1.57327e-18	8.72948e-16	-	Similar to 40S ribosomal protein S4	Genetic Information Processing	Translation	ko03010//Ribosome	K02987	GO:0005737//cytoplasm;GO:0005840//ribosome;GO:0022627//cytosolic small ribosomal subunit	GO:0003723//RNA binding;GO:0003735//structural constituent of ribosome;GO:0019843//rRNA binding	GO:0006412//translation
Os08g0508800	18	5	67	1868	2400	1278	0.17	0.04	0.61	16.21	21.83	14.03	0.273333	17.3567	5.98868	1.97445e-18	1.06593e-15	Lox2:Os:1	Lipoxygenase, chloroplast precursor (EC 1.13.11.12)	Metabolism;Metabolism;Metabolism;Metabolism	Global and overview maps;Global and overview maps;Lipid metabolism;Lipid metabolism	ko01100//Metabolic pathways;ko01110//Biosynthesis of secondary metabolites;ko00592//alpha-Linolenic acid metabolism;ko00591//Linoleic acid metabolism	K00454;K00454;K00454;K00454	GO:0009507//chloroplast;GO:0009536//plastid	GO:0005515//protein binding;GO:0016165//linoleate 13S-lipoxygenase activity;GO:0016166//phytoene dehydrogenase activity;GO:0016491//oxidoreductase activity;GO:0016702//oxidoreductase activity, acting on single donors with incorporation of molecular oxygen, incorporation of two atoms of oxygen;GO:0046872//metal ion binding;GO:0051213//dioxygenase activity	GO:0006629//lipid metabolic process;GO:0006631//fatty acid metabolic process;GO:0006633//fatty acid biosynthetic process;GO:0009611//response to wounding;GO:0031408//oxylipin biosynthetic process;GO:0034440//lipid oxidation;GO:0051707//response to other organism;GO:0055114//oxidation-reduction process
Os05g0302700	346	182	338	2614	3353	2210	6.59	3.18	6.23	45.88	61.69	49.09	5.33333	52.22	3.29149	2.32599e-18	1.22267e-15	-	Similar to ATP/ADP carrier protein	-	-	-	-	GO:0005743//mitochondrial inner membrane;GO:0016020//membrane;GO:0016021//integral component of membrane	GO:0005471//ATP:ADP antiporter activity;GO:0022857//transmembrane transporter activity	GO:0015866//ADP transport;GO:0015867//ATP transport;GO:0055085//transmembrane transport
Os06g0115500	78	22	69	582	758	668	2.56	0.66	2.19	17.59	24.01	25.56	1.80333	22.3867	3.6339	2.61956e-18	1.34168e-15	-	Similar to 60S ribosomal protein L13 (BBC1 protein homolog)	Genetic Information Processing	Translation	ko03010//Ribosome	K02873	GO:0005840//ribosome;GO:0022625//cytosolic large ribosomal subunit	GO:0003723//RNA binding;GO:0003735//structural constituent of ribosome	GO:0006412//translation
Os02g0591700	132	66	119	1099	1322	882	4.07	1.87	3.56	31.17	39.3	31.67	3.16667	34.0467	3.42648	4.05619e-18	2.02556e-15	-	Similar to Candida glabrata strain CBS138 chromosome L complete sequence	Genetic Information Processing	Translation	ko03010//Ribosome	K02934	GO:0005840//ribosome;GO:0022625//cytosolic large ribosomal subunit	GO:0003723//RNA binding;GO:0003735//structural constituent of ribosome	GO:0000027//ribosomal large subunit assembly;GO:0002181//cytoplasmic translation;GO:0006412//translation
Os03g0348200	675	433	412	35	26	93	11.98	7.05	7.07	0.57	0.45	1.93	8.7	0.983333	-3.14526	8.6575e-18	4.21789e-15	OsTPS10	Terpene synthase-like domain containing protein	-	-	-	-	-	GO:0000287//magnesium ion binding;GO:0010333//terpene synthase activity;GO:0016829//lyase activity;GO:0046872//metal ion binding	-
Os11g0455500	1308	324	1198	10196	9588	8879	20.71	4.71	20.04	148.71	150.73	166.43	15.1533	155.29	3.35726	9.8939e-18	4.70549e-15	-	Similar to Adenosylhomocysteinase	Metabolism;Metabolism	Global and overview maps;Amino acid metabolism	ko01100//Metabolic pathways;ko00270//Cysteine and methionine metabolism	K01251;K01251	GO:0005829//cytosol	GO:0004013//adenosylhomocysteinase activity;GO:0016787//hydrolase activity;GO:0051287//NAD binding	GO:0006730//one-carbon metabolic process;GO:0019510//S-adenosylhomocysteine catabolic process;GO:0033353//S-adenosylmethionine cycle
Os03g0851100	21	19	17	443	546	401	0.75	0.69	0.66	13.53	18.46	15.64	0.7	15.8767	4.50341	1.10713e-17	5.14301e-15	-	Similar to Translational elongation factor EF-TuM	Organismal Systems	Environmental adaptation	ko04626//Plant-pathogen interaction	K02358	GO:0005739//mitochondrion	GO:0000166//nucleotide binding;GO:0003746//translation elongation factor activity;GO:0003924//GTPase activity;GO:0005525//GTP binding	GO:0006414//translational elongation;GO:0070125//mitochondrial translational elongation
MSTRG.20485	116	73	159	15	14	20	0.8	0.47	1.06	0.1	0.1	0.16	0.776667	0.12	-2.69426	1.18342e-17	5.37245e-15	TY3B-I	OSJNBa0081C01.21 [Oryza sativa Japonica Group]	-	-	-	-	GO:0043231//intracellular membrane-bounded organelle	-	GO:0010466//negative regulation of peptidase activity
Os12g0632800	157	53	144	910	1245	1078	1.79	0.55	1.6	9.6	13.76	14.39	1.31333	12.5833	3.26021	1.6956e-17	7.52658e-15	HAIKU2	Protein kinase, catalytic domain domain containing protein	-	-	-	-	GO:0005886//plasma membrane;GO:0016020//membrane;GO:0016021//integral component of membrane	GO:0000166//nucleotide binding;GO:0004672//protein kinase activity;GO:0005515//protein binding;GO:0005524//ATP binding	GO:0006468//protein phosphorylation
Os04g0688500	0	0	6	396	269	457	0	0	0.12	7.82	5.57	11.43	0.04	8.27333	7.69232	2.25746e-17	9.80276e-15	prx62	Peroxidase (EC 1.11.1.7)	Metabolism;Metabolism;Metabolism	Global and overview maps;Global and overview maps;Biosynthesis of other secondary metabolites	ko01100//Metabolic pathways;ko01110//Biosynthesis of secondary metabolites;ko00940//Phenylpropanoid biosynthesis	K00430;K00430;K00430	GO:0005576//extracellular region;GO:0009505//plant-type cell wall;GO:0009506//plasmodesma	GO:0004601//peroxidase activity;GO:0016491//oxidoreductase activity;GO:0020037//heme binding;GO:0046872//metal ion binding	GO:0006979//response to oxidative stress;GO:0042744//hydrogen peroxide catabolic process;GO:0055114//oxidation-reduction process;GO:0098869//cellular oxidant detoxification
Os03g0341100	210	67	188	1597	1827	1179	8.11	2.37	7.02	56.79	68.1	53.06	5.83333	59.3167	3.34605	5.24254e-17	2.22808e-14	-	Similar to 60S ribosomal protein L18	Genetic Information Processing	Translation	ko03010//Ribosome	K02883	GO:0005840//ribosome;GO:0022625//cytosolic large ribosomal subunit	GO:0003723//RNA binding;GO:0003735//structural constituent of ribosome	GO:0006412//translation
Os03g0772600	42	14	50	690	464	579	0.59	0.18	0.68	8.88	6.26	9.43	0.483333	8.19	4.08277	5.43881e-17	2.26334e-14	-	Similar to Lectin-like receptor kinase 7;2	-	-	-	-	GO:0005886//plasma membrane;GO:0016020//membrane;GO:0016021//integral component of membrane	GO:0004672//protein kinase activity;GO:0004675//transmembrane receptor protein serine/threonine kinase activity;GO:0004713//protein tyrosine kinase activity;GO:0005524//ATP binding;GO:0030246//carbohydrate binding	GO:0002229//defense response to oomycetes;GO:0006468//protein phosphorylation;GO:0006952//defense response;GO:0007178//transmembrane receptor protein serine/threonine kinase signaling pathway;GO:0018108//peptidyl-tyrosine phosphorylation;GO:0042742//defense response to bacterium
Os04g0556400	4	0	6	362	250	217	0.05	0	0.07	4.03	2.92	3.06	0.04	3.33667	6.38226	5.58859e-17	2.27821e-14	-	Similar to UDP-glycosyltransferase UGT93B9	Metabolism	Metabolism of terpenoids and polyketides	ko00908//Zeatin biosynthesis	K13495	GO:0043231//intracellular membrane-bounded organelle	GO:0008194//UDP-glycosyltransferase activity;GO:0016758//transferase activity, transferring hexosyl groups	-
Os12g0567700	426	133	458	2794	3866	3037	11.81	3.38	12.28	71.34	103.47	98.14	9.15667	90.9833	3.31271	6.96727e-17	2.78343e-14	rpl2	Similar to 60S ribosomal protein L2 (Fragment)	Genetic Information Processing	Translation	ko03010//Ribosome	K02938	GO:0005840//ribosome;GO:0015934//large ribosomal subunit;GO:0022625//cytosolic large ribosomal subunit	GO:0003723//RNA binding;GO:0003735//structural constituent of ribosome	GO:0002181//cytoplasmic translation;GO:0006412//translation
Os07g0209000	178	60	206	1462	1696	1298	3.21	2.02	3.59	26.03	29.52	27.98	2.94	27.8433	3.24344	8.73513e-17	3.42126e-14	OsDGL1	Dolichyl-diphosphooligosaccharide-protein glycosyltransferase 48 kDa subunit precursor, N-glycosylation, Root developmen	Metabolism;Genetic Information Processing;Metabolism;Metabolism	Global and overview maps;Folding, sorting and degradation;Glycan biosynthesis and metabolism;Glycan biosynthesis and metabolism	ko01100//Metabolic pathways;ko04141//Protein processing in endoplasmic reticulum;ko00510//N-Glycan biosynthesis;ko00513//Various types of N-glycan biosynthesis	K12670;K12670;K12670;K12670	GO:0005730//nucleolus;GO:0005773//vacuole;GO:0005774//vacuolar membrane;GO:0005783//endoplasmic reticulum;GO:0005789//endoplasmic reticulum membrane;GO:0005794//Golgi apparatus;GO:0008250//oligosaccharyltransferase complex;GO:0009505//plant-type cell wall;GO:0009506//plasmodesma;GO:0016020//membrane;GO:0016021//integral component of membrane	GO:0004579//dolichyl-diphosphooligosaccharide-protein glycotransferase activity;GO:0016757//transferase activity, transferring glycosyl groups	GO:0006486//protein glycosylation;GO:0009664//plant-type cell wall organization;GO:0009826//unidimensional cell growth;GO:0018279//protein N-linked glycosylation via asparagine
Os11g0704500	81	30	88	858	646	791	4.35	1.48	4.57	42.43	33.48	49.51	3.46667	41.8067	3.59211	9.95635e-17	3.82458e-14	MT1A	Metallothionein-like protein type 1	-	-	-	-	-	GO:0046872//metal ion binding	-
Os12g0124200	99	34	118	867	1171	835	4.12	1.3	4.78	33.32	47.14	40.61	3.4	40.3567	3.5692	1.94183e-16	7.31849e-14	-	Similar to 40S ribosomal protein S16	Genetic Information Processing	Translation	ko03010//Ribosome	K02960	GO:0005737//cytoplasm;GO:0005840//ribosome;GO:0015935//small ribosomal subunit;GO:0022627//cytosolic small ribosomal subunit	GO:0003723//RNA binding;GO:0003735//structural constituent of ribosome	GO:0000462//maturation of SSU-rRNA from tricistronic rRNA transcript (SSU-rRNA, 5.8S rRNA, LSU-rRNA);GO:0006412//translation
Os04g0178300	5	2	6	728	196	315	0.06	0.02	0.09	8.11	2.26	4.57	0.0566667	4.98	6.4575	2.66288e-16	9.85021e-14	OsCPS4	Similar to Isoform 3 of Syn-copalyl diphosphate synthase	Metabolism;Metabolism	Global and overview maps;Metabolism of terpenoids and polyketides	ko01110//Biosynthesis of secondary metabolites;ko00904//Diterpenoid biosynthesis	K14043;K14043	GO:0009507//chloroplast	GO:0000287//magnesium ion binding;GO:0010333//terpene synthase activity;GO:0016829//lyase activity;GO:0016853//isomerase activity;GO:0046872//metal ion binding;GO:0051498//syn-copalyl diphosphate synthase activity	GO:0006952//defense response;GO:0009686//gibberellin biosynthetic process;GO:0016102//diterpenoid biosynthetic process
Os05g0522600	240	84	189	1312	1190	1422	2.53	0.95	1.65	11.37	10.36	15.48	1.71	12.4033	2.85866	2.82911e-16	1.02748e-13	-	Leucine-rich repeat, plant specific containing protein	-	-	-	-	GO:0005886//plasma membrane;GO:0016020//membrane;GO:0016021//integral component of membrane	GO:0004672//protein kinase activity;GO:0005515//protein binding;GO:0005524//ATP binding	GO:0006468//protein phosphorylation
Os07g0209100	654	343	739	202	230	290	6.87	3.31	7.51	1.95	2.33	3.55	5.89667	2.61	-1.17585	3.04893e-16	1.08754e-13	-	Similar to Seed imbibition protein (Fragment)	Metabolism;Metabolism	Global and overview maps;Carbohydrate metabolism	ko01100//Metabolic pathways;ko00052//Galactose metabolism	K06617;K06617	-	GO:0003824//catalytic activity;GO:0052692//raffinose alpha-galactosidase activity	GO:0010325//raffinose family oligosaccharide biosynthetic process
Os04g0401700	48	12	114	1961	1398	1956	0.53	0.11	1.3	19.57	14.72	23.57	0.646667	19.2867	4.89844	3.24862e-16	1.13844e-13	HAK1	Potassium transporter, Potassium mediated growth, Salt toleranc	-	-	-	-	GO:0016020//membrane;GO:0016021//integral component of membrane	GO:0015079//potassium ion transmembrane transporter activity	GO:0006811//ion transport;GO:0006813//potassium ion transport;GO:0071805//potassium ion transmembrane transport
Os05g0552300	65	19	39	450	632	468	1.37	0.37	0.8	8.73	12.86	11.5	0.846667	11.03	3.70349	3.82441e-16	1.31711e-13	OsWD40-122	Similar to Guanine nucleotide-binding protein beta subunit-like protein (GPB-LR) (RWD)	-	-	-	-	GO:0005634//nucleus;GO:0005829//cytosol;GO:0005840//ribosome;GO:0022627//cytosolic small ribosomal subunit	GO:0005080//protein kinase C binding;GO:0005515//protein binding;GO:0019899//enzyme binding;GO:0043022//ribosome binding	GO:0001934//positive regulation of protein phosphorylation;GO:0007165//signal transduction;GO:0072344//rescue of stalled ribosome
Os04g0448600	410	165	272	55	49	98	12.23	4.65	7.86	1.55	1.42	3.41	8.24667	2.12667	-1.95522	5.16347e-16	1.74814e-13	-	ChaC-like protein family protein	Metabolism;Metabolism	Global and overview maps;Metabolism of other amino acids	ko01100//Metabolic pathways;ko00480//Glutathione metabolism	K22596;K22596	GO:0005737//cytoplasm;GO:0005829//cytosol	GO:0003839//gamma-glutamylcyclotransferase activity	GO:0006751//glutathione catabolic process
Os06g0111500	342	105	331	1919	2650	2081	5.83	1.79	5.78	31.2	44.63	41.41	4.46667	39.08	3.12916	5.57058e-16	1.85454e-13	Os6PGDH1	Cytosolic 6-phosphogluconate dehydrogenase	Metabolism;Metabolism;Metabolism;Metabolism;Metabolism	Global and overview maps;Global and overview maps;Global and overview maps;Metabolism of other amino acids;Carbohydrate metabolism	ko01100//Metabolic pathways;ko01110//Biosynthesis of secondary metabolites;ko01200//Carbon metabolism;ko00480//Glutathione metabolism;ko00030//Pentose phosphate pathway	K00033;K00033;K00033;K00033;K00033	GO:0005737//cytoplasm;GO:0005829//cytosol	GO:0004616//phosphogluconate dehydrogenase (decarboxylating) activity;GO:0016491//oxidoreductase activity;GO:0050661//NADP binding	GO:0006098//pentose-phosphate shunt;GO:0009051//pentose-phosphate shunt, oxidative branch;GO:0009409//response to cold;GO:0009414//response to water deprivation;GO:0009651//response to salt stress;GO:0009737//response to abscisic acid;GO:0019521//D-gluconate metabolic process;GO:0046177//D-gluconate catabolic process;GO:0055114//oxidation-reduction process
Os04g0607400	209	105	147	0	0	2	3.13	1.45	2.11	0	0	0.03	2.23	0.01	-7.8009	5.9657e-16	1.95352e-13	-	Conserved hypothetical protein	-	-	-	-	-	-	-
Os03g0343500	56	17	57	497	637	460	2.1	0.63	2.33	19.4	26.16	22.67	1.68667	22.7433	3.7532	6.46009e-16	2.0813e-13	BIP108	Similar to 60S ribosomal protein L22-2	Genetic Information Processing	Translation	ko03010//Ribosome	K02891	GO:0005840//ribosome;GO:0022625//cytosolic large ribosomal subunit	GO:0003723//RNA binding;GO:0003735//structural constituent of ribosome	GO:0002181//cytoplasmic translation;GO:0006412//translation
Os07g0614500	138	58	184	1180	1354	1158	4	1.54	5.16	31.48	37.86	39.1	3.56667	36.1467	3.34121	7.72626e-16	2.44971e-13	eEF-1beta	Similar to Elongation factor 1 beta 2	-	-	-	-	GO:0005829//cytosol;GO:0005853//eukaryotic translation elongation factor 1 complex	GO:0003746//translation elongation factor activity;GO:0005085//guanyl-nucleotide exchange factor activity	GO:0006412//translation;GO:0006414//translational elongation
Os01g0930400	67	14	47	516	755	506	0.74	0.14	0.5	5.26	8.07	6.52	0.46	6.61667	3.8464	1.0703e-15	3.3405e-13	HAK5	Potassium transporter, High-affinity K acquisition, Root-to-shoot K transport, K-regulated salt toleranc	-	-	-	-	GO:0016020//membrane;GO:0016021//integral component of membrane	GO:0015079//potassium ion transmembrane transporter activity	GO:0006811//ion transport;GO:0006813//potassium ion transport;GO:0071805//potassium ion transmembrane transport
Os09g0507800	149	23	105	1105	1518	1249	4.19	0.59	2.86	28.64	41.24	40.97	2.54667	36.95	3.85889	1.13746e-15	3.4955e-13	surf-3	60S ribosomal protein L7a	Genetic Information Processing	Translation	ko03010//Ribosome	K02936	GO:0005840//ribosome;GO:0022625//cytosolic large ribosomal subunit;GO:1990904//ribonucleoprotein complex	GO:0003723//RNA binding	GO:0000470//maturation of LSU-rRNA;GO:0006412//translation;GO:0042254//ribosome biogenesis
Os03g0154700	111	34	105	747	987	716	3.39	0.94	3.11	21.08	29.19	25.59	2.48	25.2867	3.34996	1.38307e-15	4.17322e-13	OsRPS9-2	Similar to 40S ribosomal protein S9	Genetic Information Processing	Translation	ko03010//Ribosome	K02997	GO:0005840//ribosome;GO:0015935//small ribosomal subunit;GO:0022627//cytosolic small ribosomal subunit	GO:0003723//RNA binding;GO:0003735//structural constituent of ribosome;GO:0019843//rRNA binding	GO:0006412//translation;GO:0045903//positive regulation of translational fidelity
Os01g0723400	733	214	661	3841	4670	3730	10.2	2.72	9.03	49.03	61.49	60.42	7.31667	56.98	2.9612	1.39978e-15	4.17322e-13	NADP-ME2	NADP-malic enzyme, Splicing varian	Metabolism;Metabolism;Metabolism;Metabolism	Global and overview maps;Global and overview maps;Carbohydrate metabolism;Energy metabolism	ko01100//Metabolic pathways;ko01200//Carbon metabolism;ko00620//Pyruvate metabolism;ko00710//Carbon fixation in photosynthetic organisms	K00029;K00029;K00029;K00029	-	GO:0004470//malic enzyme activity;GO:0004471//malate dehydrogenase (decarboxylating) (NAD+) activity;GO:0016491//oxidoreductase activity;GO:0046872//metal ion binding;GO:0051287//NAD binding	GO:0055114//oxidation-reduction process
Os02g0162500	121	38	155	1099	1381	1071	4.64	1.34	5.75	38.78	51.08	47.83	3.91	45.8967	3.55315	1.67557e-15	4.92198e-13	-	Similar to 40S ribosomal protein S14	Genetic Information Processing	Translation	ko03010//Ribosome	K02955	GO:0005840//ribosome;GO:0022627//cytosolic small ribosomal subunit	GO:0003735//structural constituent of ribosome;GO:0048027//mRNA 5'-UTR binding;GO:0070181//small ribosomal subunit rRNA binding	GO:0000028//ribosomal small subunit assembly;GO:0000462//maturation of SSU-rRNA from tricistronic rRNA transcript (SSU-rRNA, 5.8S rRNA, LSU-rRNA);GO:0006412//translation
Os03g0757900	238	50	209	2121	2482	1534	3.64	0.7	3.09	29.87	36.63	27.34	2.47667	31.28	3.65877	1.80742e-15	5.23235e-13	-	Similar to UDP-glucose 6-dehydrogenase (EC 1.1.1.22) (UDP-Glc dehydrogenase) (UDP-GlcDH) (UDPGDH)	Metabolism;Metabolism;Metabolism;Metabolism	Global and overview maps;Carbohydrate metabolism;Carbohydrate metabolism;Carbohydrate metabolism	ko01100//Metabolic pathways;ko00520//Amino sugar and nucleotide sugar metabolism;ko00040//Pentose and glucuronate interconversions;ko00053//Ascorbate and aldarate metabolism	K00012;K00012;K00012;K00012	GO:0005634//nucleus;GO:0005829//cytosol	GO:0003979//UDP-glucose 6-dehydrogenase activity;GO:0016491//oxidoreductase activity;GO:0016616//oxidoreductase activity, acting on the CH-OH group of donors, NAD or NADP as acceptor;GO:0051287//NAD binding	GO:0006024//glycosaminoglycan biosynthetic process;GO:0006065//UDP-glucuronate biosynthetic process;GO:0055114//oxidation-reduction process
Os06g0571400	108	20	122	1192	1534	1111	2.01	0.36	2.2	20.48	27.62	24.15	1.52333	24.0833	3.98273	1.96125e-15	5.59656e-13	OsEF1G2	Similar to Elongation factor 1 gamma-like protein (Fragment)	-	-	-	-	-	GO:0003746//translation elongation factor activity;GO:0005515//protein binding	GO:0006412//translation;GO:0006414//translational elongation
Os01g0389700	8	0	11	256	357	223	0.26	0	0.34	7.6	11.11	8.38	0.2	9.03	5.49665	2.26194e-15	6.35015e-13	-	Protein of unknown function DUF679 family protein	-	-	-	-	GO:0016020//membrane;GO:0016021//integral component of membrane	-	GO:0010256//endomembrane system organization
Os04g0451200	240	94	281	2437	1657	1980	4.28	1.53	4.85	39.71	28.38	40.87	3.55333	36.32	3.35352	2.7773e-15	7.59954e-13	-	UDP-glucuronosyl/UDP-glucosyltransferase family protein	-	-	-	-	GO:0043231//intracellular membrane-bounded organelle	GO:0008194//UDP-glycosyltransferase activity;GO:0016740//transferase activity;GO:0016757//transferase activity, transferring glycosyl groups;GO:0016758//transferase activity, transferring hexosyl groups	-
Os07g0208000	261	84	341	2615	3049	2045	10.43	3.08	13.18	96.25	117.62	95.26	8.89667	103.043	3.53384	3.13319e-15	8.44704e-13	-	Similar to 40S ribosomal protein S15A	Genetic Information Processing	Translation	ko03010//Ribosome	K02957	GO:0005840//ribosome;GO:0022627//cytosolic small ribosomal subunit	GO:0003735//structural constituent of ribosome	GO:0006412//translation
Os03g0196400	16	4	28	324	408	580	0.39	0.09	0.66	7.28	9.61	16.49	0.38	11.1267	4.87188	3.17161e-15	8.44704e-13	-	Similar to UPF0497 membrane protein 12	-	-	-	-	GO:0005886//plasma membrane;GO:0016020//membrane;GO:0016021//integral component of membrane	-	-
Os03g0424500	89	51	136	1022	1371	911	3.07	1.62	4.53	32.49	45.7	36.64	3.07333	38.2767	3.63859	3.38482e-15	8.89628e-13	RPS4	Similar to 40S ribosomal protein S19-3	Genetic Information Processing	Translation	ko03010//Ribosome	K02966	GO:0005840//ribosome;GO:0022627//cytosolic small ribosomal subunit	GO:0003723//RNA binding;GO:0003735//structural constituent of ribosome	GO:0000028//ribosomal small subunit assembly;GO:0006412//translation
Os07g0229900	70	17	66	548	755	548	2.61	0.62	2.42	19.2	27.96	23.43	1.88333	23.53	3.64314	4.16394e-15	1.08019e-12	-	Ribosomal protein S12e domain containing protein	Genetic Information Processing	Translation	ko03010//Ribosome	K02951	GO:0005840//ribosome;GO:0022627//cytosolic small ribosomal subunit	GO:0003735//structural constituent of ribosome	GO:0006412//translation
Os02g0220500	221	95	257	1557	1823	1328	3.85	1.52	4.33	24.97	30.65	26.96	3.23333	27.5267	3.08974	5.80822e-15	1.48743e-12	-	Elongation factor 1-gamma (EF-1-gamma) (eEF-1B gamma)	-	-	-	-	-	GO:0003746//translation elongation factor activity;GO:0005515//protein binding	GO:0006412//translation;GO:0006414//translational elongation
Os07g0450000	16	3	29	349	509	386	0.66	0.1	1.17	13.61	20.81	19.04	0.643333	17.82	4.79179	6.68884e-15	1.69126e-12	-	Similar to 60S ribosomal protein L44	Genetic Information Processing	Translation	ko03010//Ribosome	K02929	GO:0005840//ribosome;GO:0022625//cytosolic large ribosomal subunit	GO:0003735//structural constituent of ribosome	GO:0006412//translation
Os03g0390000	63	35	54	588	553	468	1.84	0.94	1.53	15.81	15.58	15.92	1.43667	15.77	3.45639	7.41646e-15	1.8518e-12	RPS6	Similar to Ribosomal protein s6 RPS6-2	Genetic Information Processing	Translation	ko03010//Ribosome	K02991	GO:0005840//ribosome	GO:0003735//structural constituent of ribosome	GO:0006412//translation
Os02g0229000	65	16	53	491	563	441	2.68	0.61	2.12	18.68	22.44	21.23	1.80333	20.7833	3.52669	8.05018e-15	1.98521e-12	-	Similar to 40S ribosomal protein S19-like	Genetic Information Processing	Translation	ko03010//Ribosome	K02974	GO:0005840//ribosome	GO:0003735//structural constituent of ribosome	GO:0006412//translation
Os03g0200500	36	18	39	324	458	381	1.13	0.47	1.2	9.4	13.95	14	0.933333	12.45	3.73761	9.10955e-15	2.21906e-12	cyc07	40S ribosomal protein S3a (CYC07 protein)	Genetic Information Processing	Translation	ko03010//Ribosome	K02984	GO:0005737//cytoplasm;GO:0005829//cytosol;GO:0005840//ribosome;GO:0022627//cytosolic small ribosomal subunit	GO:0003735//structural constituent of ribosome	GO:0006412//translation
Os03g0843800	1214	159	943	115	49	108	35.65	4.29	26.79	3.11	1.39	3.7	22.2433	2.73333	-3.02464	9.70108e-15	2.33469e-12	OsHOL1	Methyl chloride transferase	-	-	-	-	-	GO:0008168//methyltransferase activity;GO:0008757//S-adenosylmethionine-dependent methyltransferase activity;GO:0016740//transferase activity	GO:0032259//methylation
MSTRG.25968	2	0	4	373	146	343	0.05	0	0.09	7.94	3.26	9.25	0.0466667	6.81667	7.19053	9.90382e-15	2.3551e-12	JUB1	transcription factor JUNGBRUNNEN 1 [Oryza sativa Japonica Group]	-	-	-	-	-	-	GO:0005991//trehalose metabolic process;GO:0006560//proline metabolic process;GO:0006972//hyperosmotic response;GO:0009700//indole phytoalexin biosynthetic process;GO:0009725//response to hormone;GO:0009813//flavonoid biosynthetic process;GO:0009814//defense response, incompatible interaction;GO:0010260//organ senescence;GO:0010467//gene expression;GO:0033554//cellular response to stress;GO:00346…
Os03g0177900	1395	382	1594	10196	11979	9785	24.95	6.28	27.59	172.73	206.84	212.33	19.6067	197.3	3.33097	1.02757e-14	2.38802e-12	rfa3*	EF-1 alpha	Genetic Information Processing	Translation	ko03013//RNA transport	K03231	GO:0005737//cytoplasm	GO:0000166//nucleotide binding;GO:0003746//translation elongation factor activity;GO:0003924//GTPase activity;GO:0005525//GTP binding	GO:0006412//translation;GO:0006414//translational elongation
MSTRG.26888	74	23	46	429	592	492	0.46	0.15	0.27	3.01	3.77	4.03	0.293333	3.60333	3.61872	1.02813e-14	2.38802e-12	GIP	polyprotein [Oryza australiensis]	-	-	-	-	GO:0043231//intracellular membrane-bounded organelle	GO:0016787//hydrolase activity	GO:0043170//macromolecule metabolic process;GO:0044238//primary metabolic process
Os11g0168200	288	87	452	3523	4087	3166	5.98	1.66	9.02	67.26	81.74	76.51	5.55333	75.17	3.75873	1.39383e-14	3.19043e-12	RPL3B	Ribosomal large subunit protein L3B, Regulation of leaf morphology and plant architectur	Genetic Information Processing	Folding, sorting and degradation	ko04130//SNARE interactions in vesicular transport	K08498	GO:0005840//ribosome;GO:0022625//cytosolic large ribosomal subunit	GO:0003723//RNA binding;GO:0003735//structural constituent of ribosome	GO:0000027//ribosomal large subunit assembly;GO:0006412//translation
Os10g0542900	18	5	29	654	282	643	0.5	0.13	0.78	16.68	7.54	20.76	0.47	14.9933	4.99552	1.40555e-14	3.19043e-12	Cht8	Similar to chitinase	Metabolism;Environmental Information Processing;Metabolism	Global and overview maps;Signal transduction;Carbohydrate metabolism	ko01100//Metabolic pathways;ko04016//MAPK signaling pathway - plant;ko00520//Amino sugar and nucleotide sugar metabolism	K20547;K20547;K20547	-	GO:0004568//chitinase activity;GO:0016787//hydrolase activity;GO:0016798//hydrolase activity, acting on glycosyl bonds;GO:0030247//polysaccharide binding	GO:0000272//polysaccharide catabolic process;GO:0005975//carbohydrate metabolic process;GO:0006032//chitin catabolic process;GO:0008152//metabolic process;GO:0016998//cell wall macromolecule catabolic process;GO:0050832//defense response to fungus
Os01g0134700	62	12	59	565	548	588	1.15	0.2	1.06	9.65	9.8	12.7	0.803333	10.7167	3.73771	1.67315e-14	3.7552e-12	-	Calmodulin binding protein-like family protein	-	-	-	-	GO:0005634//nucleus	GO:0003700//transcription factor activity, sequence-specific DNA binding;GO:0005516//calmodulin binding;GO:0043565//sequence-specific DNA binding	GO:0002229//defense response to oomycetes;GO:0006355//regulation of transcription, DNA-templated;GO:0010112//regulation of systemic acquired resistance;GO:0010224//response to UV-B;GO:0042742//defense response to bacterium;GO:0071219//cellular response to molecule of bacterial origin;GO:0080142//regulation of salicylic acid biosynthetic process;GO:1900426//positive regulation of defense response …
Os08g0503700	1056	349	675	249	145	273	15.29	4.64	9.47	3.33	2.03	4.62	9.8	3.32667	-1.5587	2.02511e-14	4.49461e-12	-	Sodium/sulphate symporter family protein	-	-	-	-	GO:0016020//membrane;GO:0016021//integral component of membrane	GO:0005215//transporter activity;GO:0022857//transmembrane transporter activity	GO:0006814//sodium ion transport;GO:0055085//transmembrane transport;GO:0098656//anion transmembrane transport
Os08g0559200	51	15	65	520	719	502	2.44	0.65	3.01	22.94	33.22	28.04	2.03333	28.0667	3.78694	2.19912e-14	4.82719e-12	RPS25	Similar to Ribosomal protein S25 (40S ribosomal 25S subunit)	Genetic Information Processing	Translation	ko03010//Ribosome	K02975	GO:0005840//ribosome;GO:0022627//cytosolic small ribosomal subunit	GO:0003735//structural constituent of ribosome	-
Os05g0445500	294	151	421	2399	2634	2325	11.18	5.27	15.48	84	96.67	103.03	10.6433	94.5667	3.15138	2.23116e-14	4.84428e-12	-	Similar to Acidic ribosomal protein (Fragment)	Genetic Information Processing	Translation	ko03010//Ribosome	K02943	GO:0005840//ribosome	GO:0003735//structural constituent of ribosome	GO:0006414//translational elongation
Os01g0962700	347	64	224	2169	2023	2407	7.38	1.25	4.61	42.46	41.51	59.63	4.41333	47.8667	3.43908	2.51283e-14	5.39719e-12	prx20	Similar to Peroxidase 12 precursor (EC 1.11.1.7) (Atperox P12) (PRXR6) (ATP4a)	Metabolism;Metabolism;Metabolism	Global and overview maps;Global and overview maps;Biosynthesis of other secondary metabolites	ko01100//Metabolic pathways;ko01110//Biosynthesis of secondary metabolites;ko00940//Phenylpropanoid biosynthesis	K00430;K00430;K00430	GO:0005576//extracellular region;GO:0009505//plant-type cell wall;GO:0009506//plasmodesma	GO:0004601//peroxidase activity;GO:0016491//oxidoreductase activity;GO:0020037//heme binding;GO:0046872//metal ion binding	GO:0006979//response to oxidative stress;GO:0042744//hydrogen peroxide catabolic process;GO:0055114//oxidation-reduction process;GO:0098869//cellular oxidant detoxification
Os05g0217700	602	331	449	34	76	134	16.43	8.29	11.86	0.85	2.01	4.25	12.1933	2.37	-2.36313	2.70339e-14	5.7447e-12	OsBURP07	BURP domain containing protein	-	-	-	-	-	-	-
Os03g0598800	118	16	88	910	1421	1021	3.95	0.49	2.85	28.09	45.97	39.88	2.43	37.98	3.96621	3.51072e-14	7.30485e-12	OsRPL15	Similar to Ribosomal protein L15	Genetic Information Processing	Translation	ko03010//Ribosome	K02877	GO:0005840//ribosome;GO:0022625//cytosolic large ribosomal subunit	GO:0003723//RNA binding;GO:0003735//structural constituent of ribosome	GO:0002181//cytoplasmic translation;GO:0006412//translation
MSTRG.3364	10	0	22	494	362	508	0.17	0	0.37	7.85	6.03	10.22	0.18	8.03333	5.47993	3.71404e-14	7.64824e-12	CYP94B1	cytochrome P450 94B3 [Oryza sativa Japonica Group]	-	-	-	-	-	GO:0016491//oxidoreductase activity;GO:0046906//tetrapyrrole binding;GO:0046914//transition metal ion binding	GO:0044710//single-organism metabolic process
Os01g0796000	11	0	16	386	482	239	0.57	0	0.81	18.52	24.24	14.51	0.46	19.09	5.37504	4.02806e-14	8.21026e-12	-	Conserved hypothetical protein	-	-	-	-	-	-	-
Os01g0152000	11	6	18	256	314	209	0.07	0.04	0.12	1.56	2.01	1.61	0.0766667	1.72667	4.49325	4.12692e-14	8.32678e-12	-	Protein kinase, core domain containing protein	-	-	-	-	GO:0016020//membrane;GO:0016021//integral component of membrane	GO:0000166//nucleotide binding;GO:0004672//protein kinase activity;GO:0004674//protein serine/threonine kinase activity;GO:0005515//protein binding;GO:0005524//ATP binding;GO:0016301//kinase activity;GO:0016740//transferase activity	GO:0006468//protein phosphorylation;GO:0016310//phosphorylation
Os10g0170200	87	17	59	541	750	584	3.64	0.65	2.39	20.87	30.32	28.51	2.22667	26.5667	3.57666	5.34651e-14	1.06797e-11	-	Similar to 40S ribosomal protein S20 (S22) (Fragment)	Genetic Information Processing	Translation	ko03010//Ribosome	K02969	GO:0005840//ribosome;GO:0015935//small ribosomal subunit;GO:0022627//cytosolic small ribosomal subunit	GO:0003735//structural constituent of ribosome	GO:0006412//translation
Os08g0409100	605	202	308	107	50	104	10.11	3.1	4.98	1.65	0.81	2.03	6.06333	1.49667	-2.01836	5.64415e-14	1.11626e-11	OsTPP6	Trehalose-6-phosphate phosphatase	Metabolism;Metabolism;Metabolism	Global and overview maps;Global and overview maps;Carbohydrate metabolism	ko01100//Metabolic pathways;ko01110//Biosynthesis of secondary metabolites;ko00500//Starch and sucrose metabolism	K01087;K01087;K01087	-	GO:0003824//catalytic activity;GO:0004805//trehalose-phosphatase activity;GO:0016787//hydrolase activity	GO:0005992//trehalose biosynthetic process;GO:0016311//dephosphorylation
Os03g0177400	1886	457	1691	10422	12572	10247	35.26	7.63	29.85	175.4	221.52	218.64	24.2467	205.187	3.08108	5.70139e-14	1.11652e-11	rfa1*	EF-1 alpha	Genetic Information Processing	Translation	ko03013//RNA transport	K03231	GO:0005737//cytoplasm	GO:0000166//nucleotide binding;GO:0003746//translation elongation factor activity;GO:0003924//GTPase activity;GO:0005525//GTP binding	GO:0006412//translation;GO:0006414//translational elongation
Os05g0363200	438	123	370	2243	2665	1992	7.52	1.94	6.15	35.44	44.12	39.84	5.20333	39.8	2.93526	6.06393e-14	1.17599e-11	OsUXS5	UDP-glucuronic acid decarboxylase	Metabolism;Metabolism	Global and overview maps;Carbohydrate metabolism	ko01100//Metabolic pathways;ko00520//Amino sugar and nucleotide sugar metabolism	K08678;K08678	GO:0005737//cytoplasm;GO:0005802//trans-Golgi network	GO:0048040//UDP-glucuronate decarboxylase activity;GO:0070403//NAD+ binding	GO:0042732//D-xylose metabolic process
Os03g0231600	118	28	49	833	887	649	2.02	0.44	0.81	13.12	14.65	12.94	1.09	13.57	3.63802	7.15563e-14	1.37436e-11	-	Similar to Branched-chain-amino-acid aminotransferase 3, chloroplast precursor (EC 2.6.1.42) (Atbcat-3)	Metabolism;Metabolism;Metabolism;Metabolism;Metabolism;Metabolism;Metabolism;Metabolism;Metabolism	Global and overview maps;Global and overview maps;Global and overview maps;Amino acid metabolism;Global and overview maps;Amino acid metabolism;Metabolism of cofactors and vitamins;Amino acid metabolism;Biosynthesis of other secondary metabolites	ko01100//Metabolic pathways;ko01110//Biosynthesis of secondary metabolites;ko01230//Biosynthesis of amino acids;ko00270//Cysteine and methionine metabolism;ko01210//2-Oxocarboxylic acid metabolism;ko00280//Valine, leucine and isoleucine degradation;ko00770//Pantothenate and CoA biosynthesis;ko00290//Valine, leucine and isoleucine biosynthesis;ko00966//Glucosinolate biosynthesis	K00826;K00826;K00826;K00826;K00826;K00826;K00826;K00826;K00826	-	GO:0003824//catalytic activity;GO:0004084//branched-chain-amino-acid transaminase activity;GO:0008483//transaminase activity;GO:0016740//transferase activity;GO:0052654//L-leucine transaminase activity;GO:0052655//L-valine transaminase activity;GO:0052656//L-isoleucine transaminase activity	GO:0008652//cellular amino acid biosynthetic process;GO:0009081//branched-chain amino acid metabolic process;GO:0009082//branched-chain amino acid biosynthetic process
Os01g0825500	941	274	428	162	185	223	14.7	3.91	6.44	2.29	2.86	4.09	8.35	3.08	-1.43885	7.40031e-14	1.40782e-11	-	Nodulin-like domain containing protein	-	-	-	-	GO:0016020//membrane;GO:0016021//integral component of membrane	-	-
Os07g0614600	11	3	16	247	293	193	0.17	0.04	0.23	3.45	4.27	3.41	0.146667	3.71	4.66081	8.39977e-14	1.58288e-11	-	Transmembrane receptor, eukaryota domain containing protein	-	-	-	-	GO:0016020//membrane;GO:0016021//integral component of membrane	-	-
Os04g0677000	70	43	56	1	3	3	1.59	0.9	1.22	0.02	0.07	0.08	1.23667	0.0566667	-4.44781	9.08232e-14	1.69551e-11	-	Protein of unknown function DUF1677, Oryza sativa family protein	-	-	-	-	-	-	-
Os12g0181600	692	209	566	209	221	258	11.43	3.17	9.04	3.18	3.52	4.97	7.88	3.89	-1.01843	9.92778e-14	1.83618e-11	OsAAP11B	Amino acid transporter, transmembrane domain containing protein	-	-	-	-	GO:0005886//plasma membrane;GO:0016020//membrane;GO:0016021//integral component of membrane	GO:0015171//amino acid transmembrane transporter activity	GO:0003333//amino acid transmembrane transport
Os02g0106100	3332	2998	2903	790	690	1234	40.51	33.46	34.15	8.85	8.1	17.49	36.04	11.48	-1.65048	1.02548e-13	1.87926e-11	OSINV3	Similar to Fructosyltransferase	-	-	-	-	GO:0016021//integral component of membrane	GO:0004553//hydrolase activity, hydrolyzing O-glycosyl compounds;GO:0004564//beta-fructofuranosidase activity;GO:0004575//sucrose alpha-glucosidase activity;GO:0016787//hydrolase activity;GO:0016798//hydrolase activity, acting on glycosyl bonds	GO:0005975//carbohydrate metabolic process;GO:0008152//metabolic process
Os01g0752300	61	11	36	382	562	497	1.99	0.33	1.14	11.49	17.72	18.92	1.15333	16.0433	3.79809	1.13651e-13	2.0638e-11	-	Similar to 60S ribosomal protein L18a-1	Genetic Information Processing	Translation	ko03010//Ribosome	K02882	GO:0005840//ribosome;GO:0022625//cytosolic large ribosomal subunit	GO:0003735//structural constituent of ribosome	GO:0006412//translation
Os11g0264000	1	0	2	789	86	1054	0.02	0	0.03	12.07	1.38	20.4	0.0166667	11.2833	9.40301	1.2732e-13	2.29118e-11	OsLAC22	Cupredoxin domain containing protein	-	-	-	-	GO:0005576//extracellular region;GO:0005886//plasma membrane;GO:0048046//apoplast	GO:0004322//ferroxidase activity;GO:0005507//copper ion binding;GO:0016491//oxidoreductase activity;GO:0016722//oxidoreductase activity, oxidizing metal ions;GO:0046872//metal ion binding;GO:0052716//hydroquinone:oxygen oxidoreductase activity	GO:0006826//iron ion transport;GO:0046274//lignin catabolic process;GO:0055072//iron ion homeostasis;GO:0055114//oxidation-reduction process
Os03g0835900	83	51	80	1106	621	1038	2.88	1.63	2.69	35.38	20.82	42.02	2.4	32.74	3.76995	1.34986e-13	2.40745e-11	OsFd3	Similar to Ferredoxin III, chloroplast precursor (Fd III)	Metabolism	Energy metabolism	ko00195//Photosynthesis	K02639	GO:0009507//chloroplast;GO:0009536//plastid	GO:0009055//electron carrier activity;GO:0046872//metal ion binding;GO:0051536//iron-sulfur cluster binding;GO:0051537//2 iron, 2 sulfur cluster binding	GO:0022900//electron transport chain;GO:0055114//oxidation-reduction process
Os01g0372700	314	113	265	1359	1577	1292	4.41	1.45	3.61	17.59	21.39	21.16	3.15667	20.0467	2.66689	1.51448e-13	2.67714e-11	-	Similar to Asparaginyl-tRNA synthetase, cytoplasmic 1 (EC 6.1.1.22) (Asparagine-- tRNA ligase 1) (AsnRS 1)	Genetic Information Processing	Translation	ko00970//Aminoacyl-tRNA biosynthesis	K01893	GO:0005737//cytoplasm	GO:0000166//nucleotide binding;GO:0003676//nucleic acid binding;GO:0004812//aminoacyl-tRNA ligase activity;GO:0004816//asparagine-tRNA ligase activity;GO:0005524//ATP binding	GO:0006418//tRNA aminoacylation for protein translation;GO:0006421//asparaginyl-tRNA aminoacylation
Os01g0597800	64	13	31	499	514	394	0.97	0.18	0.46	6.95	7.51	6.95	0.536667	7.13667	3.73315	1.59782e-13	2.79969e-11	-	UDP-glucuronosyl/UDP-glucosyltransferase family protein	Metabolism;Metabolism	Global and overview maps;Biosynthesis of other secondary metabolites	ko01110//Biosynthesis of secondary metabolites;ko00940//Phenylpropanoid biosynthesis	K23260;K23260	GO:0016020//membrane;GO:0016021//integral component of membrane;GO:0043231//intracellular membrane-bounded organelle	GO:0008194//UDP-glycosyltransferase activity;GO:0016740//transferase activity;GO:0016757//transferase activity, transferring glycosyl groups;GO:0016758//transferase activity, transferring hexosyl groups;GO:0080043//quercetin 3-O-glucosyltransferase activity;GO:0080044//quercetin 7-O-glucosyltransferase activity	-
Os07g0129200	5	2	0	422	127	351	0.16	0.06	0	12.36	3.9	13.01	0.0733333	9.75667	7.05578	1.70505e-13	2.9616e-11	PR1A	Pathogenesis-related 1a protein, Regulation of abiotic stress response	Organismal Systems;Environmental Information Processing;Environmental Information Processing	Environmental adaptation;Signal transduction;Signal transduction	ko04626//Plant-pathogen interaction;ko04075//Plant hormone signal transduction;ko04016//MAPK signaling pathway - plant	K13449;K13449;K13449	GO:0005576//extracellular region	-	-
Os07g0616600	29	21	51	502	632	397	0.64	0.43	1.09	10.24	13.51	10.25	0.72	11.3333	3.97643	1.79168e-13	3.08525e-11	40SRPS	Similar to 40S ribosomal protein SA (p40) (Laminin receptor homolog)	Genetic Information Processing	Translation	ko03010//Ribosome	K02998	GO:0005737//cytoplasm;GO:0005840//ribosome;GO:0015935//small ribosomal subunit;GO:0022627//cytosolic small ribosomal subunit	GO:0003735//structural constituent of ribosome	GO:0000028//ribosomal small subunit assembly;GO:0000447//endonucleolytic cleavage in ITS1 to separate SSU-rRNA from 5.8S rRNA and LSU-rRNA from tricistronic rRNA transcript (SSU-rRNA, 5.8S rRNA, LSU-rRNA);GO:0000461//endonucleolytic cleavage to generate mature 3'-end of SSU-rRNA from (SSU-rRNA, 5.8S rRNA, LSU-rRNA);GO:0002181//cytoplasmic translation;GO:0006407//rRNA export from nucleus;GO:000641…
Os04g0469000	51	25	38	416	832	436	2.15	0.97	1.55	16.18	33.92	21.47	1.55667	23.8567	3.93786	1.8947e-13	3.23476e-11	-	Heavy metal transport/detoxification protein domain containing protein	-	-	-	-	-	-	-
Os06g0128800	3	3	3	225	307	119	0.09	0.09	0.09	6.45	9.22	4.32	0.09	6.66333	6.21018	2.04835e-13	3.43831e-11	-	C2 calcium/lipid-binding domain, CaLB domain containing protein	-	-	-	-	-	-	-
Os05g0475700	668	186	428	129	182	196	10.27	2.63	6.32	1.83	2.68	3.51	6.40667	2.67333	-1.26093	2.25157e-13	3.74793e-11	OsMFS3	Nodulin-like domain containing protein	-	-	-	-	GO:0016020//membrane;GO:0016021//integral component of membrane	-	-
Os07g0246200	136	31	64	674	995	840	2.6	0.54	1.18	11.8	18.3	18.66	1.44	16.2533	3.49659	2.27047e-13	3.74816e-11	CRO1	Similar to Calreticulin (Fragment)	Genetic Information Processing;Cellular Processes	Folding, sorting and degradation;Transport and catabolism	ko04141//Protein processing in endoplasmic reticulum;ko04145//Phagosome	K08057;K08057	GO:0005783//endoplasmic reticulum;GO:0005788//endoplasmic reticulum lumen;GO:0005789//endoplasmic reticulum membrane	GO:0005509//calcium ion binding;GO:0005515//protein binding;GO:0030246//carbohydrate binding;GO:0046872//metal ion binding;GO:0051082//unfolded protein binding	GO:0006457//protein folding;GO:0007275//multicellular organism development;GO:0030968//endoplasmic reticulum unfolded protein response
Os06g0562600	93	33	112	636	790	726	1.32	0.44	1.54	8.32	10.82	12.02	1.1	10.3867	3.23916	2.45489e-13	4.01938e-11	-	Similar to T-complex protein 1, epsilon subunit (TCP-1-epsilon) (CCT-epsilon) (TCP-K36)	-	-	-	-	GO:0005737//cytoplasm;GO:0005832//chaperonin-containing T-complex;GO:0005886//plasma membrane;GO:0009506//plasmodesma	GO:0000166//nucleotide binding;GO:0005524//ATP binding;GO:0051082//unfolded protein binding	GO:0006457//protein folding
Os06g0591200	22	16	171	4616	2746	3293	0.78	0.52	5.87	150.82	94.04	136.17	2.39	127.01	5.73179	2.58449e-13	4.19717e-11	-	Conserved hypothetical protein	-	-	-	-	-	-	-
Os05g0311500	1059	1312	1153	290	235	374	25.73	29.26	27.1	6.49	5.51	10.59	27.3633	7.53	-1.86152	2.74967e-13	4.4294e-11	-	Protein of unknown function DUF567 family protein	-	-	-	-	-	-	-
Os01g0218100	66	8	80	1113	889	849	0.94	0.1	1.1	14.58	12.2	14.07	0.713333	13.6167	4.25465	3.54471e-13	5.66444e-11	OsbHLH037	Helix-loop-helix DNA-binding domain containing protein	-	-	-	-	GO:0005634//nucleus	GO:0046983//protein dimerization activity	GO:0006355//regulation of transcription, DNA-templated
Os02g0785800	116	37	145	934	1229	840	5.13	1.51	6.24	38.12	52.64	43.44	4.29333	44.7333	3.38118	3.86893e-13	6.13348e-11	-	Similar to Ribosomal protein L35A	Genetic Information Processing	Translation	ko03010//Ribosome	K02917	GO:0005840//ribosome;GO:0022625//cytosolic large ribosomal subunit	GO:0003735//structural constituent of ribosome	GO:0002181//cytoplasmic translation;GO:0006412//translation;GO:0042273//ribosomal large subunit biogenesis
Os05g0365500	31	5	15	300	369	245	0.29	0.04	0.13	2.55	3.29	2.64	0.153333	2.82667	4.20436	4.26412e-13	6.70676e-11	-	Tetratricopeptide-like helical domain containing protein	-	-	-	-	GO:0005739//mitochondrion;GO:0009507//chloroplast	GO:0005515//protein binding	-
Os10g0465700	1523	396	1027	167	42	203	20.87	4.98	13.61	2.11	0.56	3.24	13.1533	1.97	-2.73916	4.89994e-13	7.56321e-11	OsSTA246	Similar to Beta-amylase PCT-BMYI (EC 3.2.1.2)	Metabolism;Metabolism;Metabolism	Global and overview maps;Global and overview maps;Carbohydrate metabolism	ko01100//Metabolic pathways;ko01110//Biosynthesis of secondary metabolites;ko00500//Starch and sucrose metabolism	K01177;K01177;K01177	GO:0009507//chloroplast;GO:0009536//plastid	GO:0016161//beta-amylase activity;GO:0016787//hydrolase activity;GO:0016798//hydrolase activity, acting on glycosyl bonds	GO:0000272//polysaccharide catabolic process;GO:0005975//carbohydrate metabolic process;GO:0008152//metabolic process
Os08g0326400	163	41	200	1305	1707	1303	4.44	1.03	5.27	32.74	44.89	41.37	3.58	39.6667	3.4699	4.90118e-13	7.56321e-11	OsRPL7A	60S ribosomal protein L7a	Genetic Information Processing	Translation	ko03010//Ribosome	K02936	GO:0005840//ribosome;GO:0022625//cytosolic large ribosomal subunit;GO:1990904//ribonucleoprotein complex	GO:0003723//RNA binding	GO:0000470//maturation of LSU-rRNA;GO:0006412//translation;GO:0042254//ribosome biogenesis
Os08g0117300	107	38	154	989	1165	904	3.41	1.11	4.75	29.05	35.87	33.6	3.09	32.84	3.40978	4.92224e-13	7.56321e-11	-	Similar to 40S ribosomal protein S13	Genetic Information Processing	Translation	ko03010//Ribosome	K02953	GO:0005730//nucleolus;GO:0005840//ribosome;GO:0022627//cytosolic small ribosomal subunit	GO:0003735//structural constituent of ribosome;GO:0070181//small ribosomal subunit rRNA binding	GO:0006412//translation
Os03g0586800	28	6	19	231	269	287	0.38	0.07	0.25	2.85	3.48	4.48	0.233333	3.60333	3.94887	5.43838e-13	8.2925e-11	-	Similar to Lysyl-tRNA synthetase (EC 6.1.1.6) (Lysine--tRNA ligase) (LysRS)	Genetic Information Processing	Translation	ko00970//Aminoacyl-tRNA biosynthesis	K04567	GO:0005737//cytoplasm;GO:0005829//cytosol;GO:0009506//plasmodesma	GO:0000049//tRNA binding;GO:0000166//nucleotide binding;GO:0003676//nucleic acid binding;GO:0004812//aminoacyl-tRNA ligase activity;GO:0004824//lysine-tRNA ligase activity;GO:0005524//ATP binding;GO:0016874//ligase activity	GO:0006412//translation;GO:0006418//tRNA aminoacylation for protein translation;GO:0006430//lysyl-tRNA aminoacylation
Os03g0721200	381	122	418	2328	2782	2015	3.65	1.03	3.89	20.67	24.1	21.77	2.85667	22.18	2.95685	6.66741e-13	1.00895e-10	-	Armadillo-like helical domain containing protein	-	-	-	-	GO:0005634//nucleus;GO:0005829//cytosol	GO:0005515//protein binding;GO:0019887//protein kinase regulator activity;GO:0019901//protein kinase binding;GO:0043022//ribosome binding	GO:0006417//regulation of translation;GO:0009682//induced systemic resistance;GO:0033674//positive regulation of kinase activity;GO:0042742//defense response to bacterium;GO:0045087//innate immune response;GO:0045859//regulation of protein kinase activity
Os01g0100700	110	27	103	726	793	650	3.6	0.81	3.27	21.91	25.09	24.83	2.56	23.9433	3.22541	7.96007e-13	1.19551e-10	RPS5	Similar to 40S ribosomal protein S5-1	Genetic Information Processing	Translation	ko03010//Ribosome	K02989	GO:0005840//ribosome;GO:0015935//small ribosomal subunit;GO:0022627//cytosolic small ribosomal subunit	GO:0003723//RNA binding;GO:0003729//mRNA binding;GO:0003735//structural constituent of ribosome;GO:0019843//rRNA binding	GO:0000028//ribosomal small subunit assembly;GO:0006412//translation
Os01g0944700	7	0	7	271	152	199	0.16	0	0.16	5.75	3.38	5.34	0.106667	4.82333	5.49885	8.51529e-13	1.26935e-10	OsPR2	Similar to Beta-1,3-glucanase precursor	-	-	-	-	GO:0046658//anchored component of plasma membrane	GO:0004553//hydrolase activity, hydrolyzing O-glycosyl compounds;GO:0016787//hydrolase activity;GO:0016798//hydrolase activity, acting on glycosyl bonds	GO:0005975//carbohydrate metabolic process;GO:0008152//metabolic process
Os09g0255400	41	14	27	1187	248	1354	0.94	0.3	0.57	24.48	5.39	35.37	0.603333	21.7467	5.1717	9.91129e-13	1.4594e-10	IGPS	Similar to Indole-3-glycerol phosphate synthase, chloroplast precursor (EC 4.1.1.48) (IGPS)	Metabolism;Metabolism;Metabolism;Metabolism	Global and overview maps;Global and overview maps;Global and overview maps;Amino acid metabolism	ko01100//Metabolic pathways;ko01110//Biosynthesis of secondary metabolites;ko01230//Biosynthesis of amino acids;ko00400//Phenylalanine, tyrosine and tryptophan biosynthesis	K01609;K01609;K01609;K01609	-	GO:0003824//catalytic activity;GO:0004425//indole-3-glycerol-phosphate synthase activity;GO:0004640//phosphoribosylanthranilate isomerase activity	GO:0000162//tryptophan biosynthetic process;GO:0006568//tryptophan metabolic process
Os11g0195500	52	18	55	408	721	414	0.66	0.21	0.67	4.78	8.85	6.14	0.513333	6.59	3.68231	9.93631e-13	1.4594e-10	PAD4	Hypothetical conserved gene	-	-	-	-	GO:0005634//nucleus;GO:0005737//cytoplasm	GO:0016787//hydrolase activity	GO:0001666//response to hypoxia;GO:0002213//defense response to insect;GO:0006629//lipid metabolic process;GO:0009625//response to insect;GO:0009816//defense response to bacterium, incompatible interaction;GO:0009862//systemic acquired resistance, salicylic acid mediated signaling pathway;GO:0010105//negative regulation of ethylene-activated signaling pathway;GO:0010150//leaf senescence;GO:001022…
Os03g0796600	1272	618	655	347	285	395	22.34	9.85	12.56	8.53	4.03	8.06	14.9167	6.87333	-1.11784	1.0488e-12	1.52919e-10	-	Protein of unknown function DUF506, plant family protein	-	-	-	-	-	-	-
Os08g0203600	71	52	65	577	725	652	0.57	0.39	0.51	4.28	5.52	6.1	0.49	5.3	3.43514	1.13326e-12	1.64035e-10	-	Hypothetical conserved gene	-	-	-	-	GO:0005886//plasma membrane;GO:0016020//membrane;GO:0016021//integral component of membrane	GO:0004672//protein kinase activity;GO:0004674//protein serine/threonine kinase activity;GO:0005524//ATP binding	GO:0006468//protein phosphorylation;GO:0046777//protein autophosphorylation
Os03g0411800	46	13	76	568	845	591	1.03	0.27	1.64	11.66	18.18	15.36	0.98	15.0667	3.94243	1.20104e-12	1.72595e-10	OsZIP2	Similar to Metal transport protein	-	-	-	-	GO:0005886//plasma membrane;GO:0016020//membrane;GO:0016021//integral component of membrane	GO:0005385//zinc ion transmembrane transporter activity;GO:0046873//metal ion transmembrane transporter activity	GO:0006811//ion transport;GO:0006829//zinc II ion transport;GO:0030001//metal ion transport;GO:0055085//transmembrane transport;GO:0071577//zinc II ion transmembrane transport
Os05g0591900	82	31	90	669	696	490	1.75	0.79	2.02	13.97	17.91	12.96	1.52	14.9467	3.29768	1.21422e-12	1.73244e-10	-	Hypothetical gene	-	-	-	-	GO:0016020//membrane;GO:0016021//integral component of membrane	-	-
Os03g0796501	178	39	170	1183	1637	1078	3.31	0.67	3.06	20.26	29.38	23.36	2.34667	24.3333	3.37425	1.44524e-12	2.04742e-10	OsRPL4	Similar to 60S ribosomal protein L4 (L1)	Genetic Information Processing	Translation	ko03010//Ribosome	K02930	GO:0005840//ribosome;GO:0022625//cytosolic large ribosomal subunit	GO:0003723//RNA binding;GO:0003735//structural constituent of ribosome	GO:0006412//translation
Os04g0598200	12	2	15	201	290	189	0.44	0.07	0.53	6.77	10.24	8.06	0.346667	8.35667	4.59131	1.4651e-12	2.06095e-10	RPL12	Similar to 60S ribosomal protein L12	Genetic Information Processing	Translation	ko03010//Ribosome	K02870	GO:0005840//ribosome;GO:0015934//large ribosomal subunit;GO:0022625//cytosolic large ribosomal subunit	GO:0003735//structural constituent of ribosome;GO:0019843//rRNA binding;GO:0070180//large ribosomal subunit rRNA binding	GO:0000027//ribosomal large subunit assembly;GO:0006412//translation
Os01g0849000	91	42	49	0	1	4	3.85	1.63	2.01	0	0.04	0.2	2.49667	0.08	-4.96386	1.52027e-12	2.1236e-10	OsLTPd5	Hypothetical protein	-	-	-	-	-	GO:0005504//fatty acid binding	GO:0009627//systemic acquired resistance
Os12g0268000	12	17	9	833	237	1432	0.19	0.24	0.14	11.96	3.57	26.03	0.19	13.8533	6.18809	1.86963e-12	2.59347e-10	sl	Similar to Cytochrome P450 71A1 (EC 1.14.-.-) (CYPLXXIA1) (ARP-2)	-	-	-	-	GO:0005783//endoplasmic reticulum;GO:0005789//endoplasmic reticulum membrane;GO:0016020//membrane;GO:0016021//integral component of membrane	GO:0004497//monooxygenase activity;GO:0005506//iron ion binding;GO:0016491//oxidoreductase activity;GO:0016705//oxidoreductase activity, acting on paired donors, with incorporation or reduction of molecular oxygen;GO:0016709//oxidoreductase activity, acting on paired donors, with incorporation or reduction of molecular oxygen, NAD(P)H as one donor, and incorporation of one atom of oxygen;GO:00200…	GO:0006587//serotonin biosynthetic process from tryptophan;GO:0006952//defense response;GO:0042427//serotonin biosynthetic process;GO:0055114//oxidation-reduction process
Os03g0139100	79	37	117	702	1010	683	3.86	1.66	5.53	31.58	47.62	38.88	3.68333	39.36	3.41765	2.05798e-12	2.83504e-10	-	Similar to Ribosomal Pr 117 (Fragment)	Genetic Information Processing	Translation	ko03010//Ribosome	K02894	GO:0005840//ribosome;GO:0022625//cytosolic large ribosomal subunit	GO:0003735//structural constituent of ribosome;GO:0070180//large ribosomal subunit rRNA binding	GO:0006412//translation
Os01g0950300	15	1	18	248	299	234	0.52	0.03	0.6	7.88	9.95	9.41	0.383333	9.08	4.56602	2.10158e-12	2.87528e-10	OsGSTU42	Conserved hypothetical protein	-	-	-	-	-	-	-
Os08g0120600	16	14	15	232	293	253	0.34	0.27	0.31	4.51	5.97	6.23	0.306667	5.57	4.18293	2.15661e-12	2.93049e-10	-	Similar to Fructose-bisphosphate aldolase, cytoplasmic isozyme (EC 4.1.2.13)	Metabolism;Metabolism;Metabolism;Metabolism;Metabolism;Metabolism;Metabolism;Metabolism	Global and overview maps;Global and overview maps;Global and overview maps;Global and overview maps;Carbohydrate metabolism;Energy metabolism;Carbohydrate metabolism;Carbohydrate metabolism	ko01100//Metabolic pathways;ko01110//Biosynthesis of secondary metabolites;ko01200//Carbon metabolism;ko01230//Biosynthesis of amino acids;ko00010//Glycolysis / Gluconeogenesis;ko00710//Carbon fixation in photosynthetic organisms;ko00051//Fructose and mannose metabolism;ko00030//Pentose phosphate pathway	K01623;K01623;K01623;K01623;K01623;K01623;K01623;K01623	GO:0005829//cytosol	GO:0003824//catalytic activity;GO:0004332//fructose-bisphosphate aldolase activity;GO:0016829//lyase activity	GO:0006096//glycolytic process;GO:0030388//fructose 1,6-bisphosphate metabolic process
MSTRG.16908	946	220	448	193	139	196	7.85	1.64	2.98	1.22	0.97	1.34	4.15667	1.17667	-1.82072	2.22195e-12	2.99888e-10	TIC214	PREDICTED: conserved [Prunus dulcis]	Metabolism;Metabolism;Metabolism;Metabolism;Metabolism	Global and overview maps;Global and overview maps;Global and overview maps;Energy metabolism;Carbohydrate metabolism	ko01100//Metabolic pathways;ko01110//Biosynthesis of secondary metabolites;ko01200//Carbon metabolism;ko00710//Carbon fixation in photosynthetic organisms;ko00630//Glyoxylate and dicarboxylate metabolism	K01601;K01601;K01601;K01601;K01601	GO:0009536//plastid	GO:0016831//carboxy-lyase activity	GO:0044710//single-organism metabolic process
Os11g0247300	950	407	700	4234	6580	3980	16.07	6.32	11.46	65.98	107.47	78.49	11.2833	83.98	2.89585	2.27358e-12	3.04796e-10	TID1	Alpha-tubulin protein, Cell elongation and divisio	Cellular Processes	Transport and catabolism	ko04145//Phagosome	K07374	GO:0005737//cytoplasm;GO:0005856//cytoskeleton;GO:0005874//microtubule	GO:0000166//nucleotide binding;GO:0003924//GTPase activity;GO:0005200//structural constituent of cytoskeleton;GO:0005525//GTP binding	GO:0000226//microtubule cytoskeleton organization;GO:0000278//mitotic cell cycle;GO:0007010//cytoskeleton organization;GO:0007017//microtubule-based process
Os05g0368300	20	6	33	286	346	312	0.52	0.15	0.82	6.75	8.55	9.29	0.496667	8.19667	4.04469	2.29064e-12	3.05036e-10	RPS4	Similar to 40S ribosomal protein S4, X isoform (Single copy abundant mRNA protein) (SCR10)	Genetic Information Processing	Translation	ko03010//Ribosome	K02987	GO:0005840//ribosome;GO:0022627//cytosolic small ribosomal subunit	GO:0003723//RNA binding;GO:0003735//structural constituent of ribosome;GO:0019843//rRNA binding	GO:0006412//translation
Os04g0180400	2	1	12	483	157	396	0.03	0.02	0.2	7.55	2.57	7.84	0.0833333	5.98667	6.16672	2.37192e-12	3.13769e-10	CYP99A2	Similar to Cytochrome P450 99A2	Metabolism;Metabolism	Global and overview maps;Metabolism of terpenoids and polyketides	ko01110//Biosynthesis of secondary metabolites;ko00904//Diterpenoid biosynthesis	K16085;K16085	GO:0016020//membrane;GO:0016021//integral component of membrane	GO:0004497//monooxygenase activity;GO:0005506//iron ion binding;GO:0016491//oxidoreductase activity;GO:0016705//oxidoreductase activity, acting on paired donors, with incorporation or reduction of molecular oxygen;GO:0016709//oxidoreductase activity, acting on paired donors, with incorporation or reduction of molecular oxygen, NAD(P)H as one donor, and incorporation of one atom of oxygen;GO:00200…	GO:0055114//oxidation-reduction process
Os04g0525900	24	72	155	0	0	0	0.37	1.05	2.36	0	0	0	1.26	0.001	-10.2992	2.4079e-12	3.16433e-10	-	Major facilitator superfamily protein	-	-	-	-	GO:0016021//integral component of membrane	-	GO:0055085//transmembrane transport
Os04g0322100	28	11	96	1374	1081	936	0.75	0.27	2.5	34.21	28.23	29.52	1.17333	30.6533	4.70736	2.57265e-12	3.35873e-10	-	Protein of unknown function DUF26 domain containing protein	-	-	-	-	-	-	-
Os07g0662500	100	31	123	710	959	730	2.89	0.82	3.44	18.91	26.77	24.6	2.38333	23.4267	3.2971	2.81196e-12	3.64733e-10	eEF-1beta'	Similar to Elongation factor 1-beta' (EF-1-beta')	-	-	-	-	GO:0005829//cytosol;GO:0005853//eukaryotic translation elongation factor 1 complex	GO:0003746//translation elongation factor activity;GO:0005085//guanyl-nucleotide exchange factor activity	GO:0006412//translation;GO:0006414//translational elongation
Os02g0611400	20	8	27	273	341	220	0.23	0.09	0.3	2.93	3.83	2.99	0.206667	3.25	3.97506	2.9491e-12	3.80053e-10	-	Pentatricopeptide repeat domain containing protein	-	-	-	-	-	GO:0005515//protein binding	-
Os10g0491000	46	6	36	441	452	349	1.6	0.19	1.21	14.09	15.14	14.11	1	14.4467	3.85266	3.18072e-12	4.07275e-10	-	Plant Basic Secretory Protein family protein	-	-	-	-	-	-	-
Os03g0271200	72	33	52	449	650	418	0.7	0.34	0.57	4	6.1	5.53	0.536667	5.21	3.27919	3.21689e-12	4.09283e-10	-	Similar to Chloroplastic outer envelope membrane protei	-	-	-	-	GO:0001401//mitochondrial sorting and assembly machinery complex;GO:0009507//chloroplast;GO:0009527//plastid outer membrane;GO:0009536//plastid;GO:0009707//chloroplast outer membrane;GO:0016020//membrane;GO:0016021//integral component of membrane;GO:0019867//outer membrane;GO:0031359//integral component of chloroplast outer membrane	-	GO:0009658//chloroplast organization;GO:0015031//protein transport;GO:0034622//cellular macromolecular complex assembly;GO:0045037//protein import into chloroplast stroma;GO:0045040//protein import into mitochondrial outer membrane
Os08g0200300	94886	41661	61447	29703	19219	36826	3968.1	1599.09	2486.03	1144.08	775.89	1795.15	2684.41	1238.37	-1.11616	3.38859e-12	4.26006e-10	OsPsbR3	Similar to Photosystem II 10 kDa polypeptide (Fragment)	Metabolism	Energy metabolism	ko00195//Photosynthesis	K03541	GO:0009523//photosystem II;GO:0009654//photosystem II oxygen evolving complex;GO:0016020//membrane;GO:0016021//integral component of membrane;GO:0042651//thylakoid membrane	-	GO:0015979//photosynthesis
Os11g0199200	174	32	148	997	1370	1180	3.17	0.56	2.63	16.7	24.41	25.65	2.12	22.2533	3.39189	3.39098e-12	4.26006e-10	ESP2	Protein disulfide isomerase-like enzyme, Starch synthesis, Maturation of proglutelin in endosper	Genetic Information Processing	Folding, sorting and degradation	ko04141//Protein processing in endoplasmic reticulum	K09580	GO:0005623//cell;GO:0005783//endoplasmic reticulum;GO:0005788//endoplasmic reticulum lumen	GO:0003756//protein disulfide isomerase activity;GO:0016853//isomerase activity	GO:0006457//protein folding;GO:0009960//endosperm development;GO:0034975//protein folding in endoplasmic reticulum;GO:0034976//response to endoplasmic reticulum stress;GO:0045454//cell redox homeostasis
Os07g0503300	34	7	61	768	760	458	0.59	0.11	1.03	12.29	12.75	9.28	0.576667	11.44	4.31021	3.46874e-12	4.28593e-10	OsUGT707A5	UDP-glucuronosyl/UDP-glucosyltransferase family protein	-	-	-	-	GO:0043231//intracellular membrane-bounded organelle	GO:0008194//UDP-glycosyltransferase activity;GO:0016740//transferase activity;GO:0016757//transferase activity, transferring glycosyl groups;GO:0016758//transferase activity, transferring hexosyl groups	-
Os02g0717600	124	48	138	722	967	718	1.83	0.65	1.97	9.8	13.76	12.34	1.48333	11.9667	3.01211	3.47463e-12	4.28593e-10	-	Similar to predicted protein	-	-	-	-	GO:0005886//plasma membrane	-	-
Os07g0532800	6	3	7	243	117	234	0.14	0.06	0.15	5.07	2.56	6.18	0.116667	4.60333	5.30221	3.47595e-12	4.28593e-10	-	Peptidase A1 domain containing protein	-	-	-	-	GO:0005576//extracellular region	GO:0004190//aspartic-type endopeptidase activity	GO:0006508//proteolysis;GO:0030163//protein catabolic process
Os03g0807800	265	82	369	2187	2564	1997	7.27	2.06	9.79	55.23	67.86	63.82	6.37333	62.3033	3.28919	3.63638e-12	4.45624e-10	SUP44	Similar to 40S ribosomal protein S2 (Fragment)	Genetic Information Processing	Translation	ko03010//Ribosome	K02981	GO:0005840//ribosome;GO:0015935//small ribosomal subunit;GO:0022627//cytosolic small ribosomal subunit;GO:1990904//ribonucleoprotein complex	GO:0003723//RNA binding;GO:0003735//structural constituent of ribosome	GO:0006412//translation
Os09g0467200	1193	316	1383	9458	7220	9776	37.64	9.15	42.22	274.87	219.93	359.56	29.67	284.787	3.2628	3.78512e-12	4.61023e-10	OsGSTU17	Similar to Glutathione S-transferase GST 23 (EC 2.5.1.18) (Fragment)	Metabolism;Metabolism	Global and overview maps;Metabolism of other amino acids	ko01100//Metabolic pathways;ko00480//Glutathione metabolism	K00799;K00799	GO:0005737//cytoplasm	GO:0004364//glutathione transferase activity;GO:0005515//protein binding;GO:0016740//transferase activity	GO:0006749//glutathione metabolic process
Os06g0716700	531	139	412	2061	2949	2588	6.85	2.2	5.08	24.88	40.03	40.63	4.71	35.18	2.90096	3.91015e-12	4.71821e-10	GRP94	Similar to Heat shock protein 90	Organismal Systems;Genetic Information Processing	Environmental adaptation;Folding, sorting and degradation	ko04626//Plant-pathogen interaction;ko04141//Protein processing in endoplasmic reticulum	K09487;K09487	GO:0005634//nucleus;GO:0005739//mitochondrion;GO:0005773//vacuole;GO:0005774//vacuolar membrane;GO:0005783//endoplasmic reticulum;GO:0005886//plasma membrane;GO:0009506//plasmodesma;GO:0009507//chloroplast;GO:0048471//perinuclear region of cytoplasm	GO:0005524//ATP binding;GO:0016887//ATPase activity;GO:0051082//unfolded protein binding	GO:0006457//protein folding;GO:0009306//protein secretion;GO:0009409//response to cold;GO:0009414//response to water deprivation;GO:0009651//response to salt stress;GO:0009934//regulation of meristem structural organization;GO:0010075//regulation of meristem growth;GO:0034976//response to endoplasmic reticulum stress;GO:0046686//response to cadmium ion
Os12g0431100	10	0	5	249	147	212	0.18	0	0.08	4.2	2.61	4.52	0.0866667	3.77667	5.44549	3.92101e-12	4.71821e-10	-	ATPase, AAA-type, core domain containing protein	-	-	-	-	-	GO:0000166//nucleotide binding;GO:0005524//ATP binding	-
Os05g0301500	219	67	234	1422	1577	1119	3.01	0.84	3.11	17.98	20.91	18.46	2.32	19.1167	3.04263	4.32433e-12	5.17236e-10	-	Similar to Ribophorin I (Fragment)	Metabolism;Genetic Information Processing;Metabolism;Metabolism	Global and overview maps;Folding, sorting and degradation;Glycan biosynthesis and metabolism;Glycan biosynthesis and metabolism	ko01100//Metabolic pathways;ko04141//Protein processing in endoplasmic reticulum;ko00510//N-Glycan biosynthesis;ko00513//Various types of N-glycan biosynthesis	K12666;K12666;K12666;K12666	GO:0005783//endoplasmic reticulum;GO:0005789//endoplasmic reticulum membrane;GO:0008250//oligosaccharyltransferase complex;GO:0016020//membrane;GO:0016021//integral component of membrane	GO:0004579//dolichyl-diphosphooligosaccharide-protein glycotransferase activity	GO:0006486//protein glycosylation;GO:0006487//protein N-linked glycosylation;GO:0018279//protein N-linked glycosylation via asparagine
Os05g0373700	22	12	40	314	433	318	0.7	0.35	1.24	9.23	13.35	11.83	0.763333	11.47	3.90941	4.82714e-12	5.73941e-10	-	Similar to Nascent polypeptide-associated complex alpha subunit-like protein 3 (NAC-alpha-like protein 3) (Alpha-NAC-like protein 3)	-	-	-	-	GO:0005854//nascent polypeptide-associated complex	-	-
Os01g0888500	45	15	51	321	494	393	0.48	0.14	0.53	3.16	5.1	4.9	0.383333	4.38667	3.51645	5.01286e-12	5.91751e-10	-	Similar to Phosphoribosylformylglycinamidine synthase	Metabolism;Metabolism;Metabolism	Global and overview maps;Global and overview maps;Nucleotide metabolism	ko01100//Metabolic pathways;ko01110//Biosynthesis of secondary metabolites;ko00230//Purine metabolism	K01952;K01952;K01952	GO:0005737//cytoplasm	GO:0004642//phosphoribosylformylglycinamidine synthase activity	GO:0006189//'de novo' IMP biosynthetic process;GO:0006541//glutamine metabolic process;GO:0009113//purine nucleobase biosynthetic process
Os06g0274200	1	1	6	129	219	169	0.04	0.03	0.22	4.51	8.02	7.47	0.0966667	6.66667	6.1078	5.03618e-12	5.91751e-10	Nhp2	Similar to H/ACA ribonucleoprotein complex subunit 2 (H/ACA snoRNP protein NHP2) (High mobility group-like nuclear protein 2)	Genetic Information Processing	Translation	ko03008//Ribosome biogenesis in eukaryotes	K11129	GO:0005634//nucleus;GO:0005730//nucleolus;GO:0031429//box H/ACA snoRNP complex	GO:0003723//RNA binding;GO:0034513//box H/ACA snoRNA binding	GO:0000469//cleavage involved in rRNA processing;GO:0000470//maturation of LSU-rRNA;GO:0006412//translation;GO:0031118//rRNA pseudouridine synthesis;GO:0031120//snRNA pseudouridine synthesis
Os07g0109500	67	22	86	484	754	595	2.31	0.69	2.86	15.34	25.04	23.86	1.95333	21.4133	3.4545	5.26349e-12	6.14844e-10	OsRPL13a	Ribosomal protein L13 family protein	Genetic Information Processing	Translation	ko03010//Ribosome	K02872	GO:0005840//ribosome;GO:0015934//large ribosomal subunit;GO:0022625//cytosolic large ribosomal subunit	GO:0003729//mRNA binding;GO:0003735//structural constituent of ribosome	GO:0006412//translation;GO:0017148//negative regulation of translation
Os07g0181000	36	13	47	439	797	327	0.77	0.2	0.89	7.93	15.6	7.76	0.62	10.43	4.07233	5.99588e-12	6.92299e-10	OsPKpa1	Similar to Pyruvate kinase isozyme A, chloroplast precursor (EC 2.7.1.40)	Metabolism;Metabolism;Metabolism;Metabolism;Metabolism;Metabolism;Metabolism	Global and overview maps;Global and overview maps;Global and overview maps;Global and overview maps;Carbohydrate metabolism;Nucleotide metabolism;Carbohydrate metabolism	ko01100//Metabolic pathways;ko01110//Biosynthesis of secondary metabolites;ko01200//Carbon metabolism;ko01230//Biosynthesis of amino acids;ko00010//Glycolysis / Gluconeogenesis;ko00230//Purine metabolism;ko00620//Pyruvate metabolism	K00873;K00873;K00873;K00873;K00873;K00873;K00873	GO:0005737//cytoplasm;GO:0009570//chloroplast stroma	GO:0000287//magnesium ion binding;GO:0003824//catalytic activity;GO:0004743//pyruvate kinase activity;GO:0016301//kinase activity;GO:0016740//transferase activity;GO:0030955//potassium ion binding	GO:0006096//glycolytic process;GO:0016310//phosphorylation;GO:0032869//cellular response to insulin stimulus
Os06g0726200	34	9	32	389	261	325	0.83	0.2	0.75	8.74	6.15	9.24	0.593333	8.04333	3.76088	6.16439e-12	7.03621e-10	Cht1*(Chi1)	Similar to Chitinase 1	Metabolism;Environmental Information Processing;Metabolism	Global and overview maps;Signal transduction;Carbohydrate metabolism	ko01100//Metabolic pathways;ko04016//MAPK signaling pathway - plant;ko00520//Amino sugar and nucleotide sugar metabolism	K20547;K20547;K20547	-	GO:0004568//chitinase activity;GO:0008061//chitin binding;GO:0016787//hydrolase activity;GO:0016798//hydrolase activity, acting on glycosyl bonds;GO:0030247//polysaccharide binding	GO:0000272//polysaccharide catabolic process;GO:0005975//carbohydrate metabolic process;GO:0006032//chitin catabolic process;GO:0006952//defense response;GO:0008152//metabolic process;GO:0016998//cell wall macromolecule catabolic process;GO:0050832//defense response to fungus
Os05g0176000	17	18	24	294	362	293	0.43	0.42	0.59	6.86	8.84	8.65	0.48	8.11667	4.07978	6.81849e-12	7.7386e-10	OsMed36_2	Similar to fibrillarin-2	Genetic Information Processing	Translation	ko03008//Ribosome biogenesis in eukaryotes	K14563	GO:0015030//Cajal body;GO:0031428//box C/D snoRNP complex;GO:0032040//small-subunit processome	GO:0003723//RNA binding;GO:0008168//methyltransferase activity;GO:0008649//rRNA methyltransferase activity;GO:1990259//histone-glutamine methyltransferase activity	GO:0000494//box C/D snoRNA 3'-end processing;GO:0006364//rRNA processing;GO:0031167//rRNA methylation;GO:1990258//histone glutamine methylation
Os01g0142300	679	240	762	168	78	202	12.12	4.01	13.24	2.82	1.33	4.09	9.79	2.74667	-1.83363	6.95573e-12	7.84976e-10	SQD2.2	Glycosyl transferase, group 1 domain containing protein	Metabolism;Metabolism	Global and overview maps;Lipid metabolism	ko01100//Metabolic pathways;ko00561//Glycerolipid metabolism	K06119;K06119	GO:0009941//chloroplast envelope	GO:0016757//transferase activity, transferring glycosyl groups;GO:0046510//UDP-sulfoquinovose:DAG sulfoquinovosyltransferase activity	GO:0009247//glycolipid biosynthetic process;GO:0046506//sulfolipid biosynthetic process
Os08g0112300	2	0	0	238	220	195	0.04	0	0	4.02	3.89	4.16	0.0133333	4.02333	8.23721	7.18263e-12	8.06028e-10	-	Transferase domain containing protein	-	-	-	-	-	GO:0016747//transferase activity, transferring acyl groups other than amino-acyl groups	-
Os11g0691300	0	7	8	480	231	466	0	0.13	0.15	8.65	4.35	10.63	0.0933333	7.87667	6.39905	7.4425e-12	8.25911e-10	-	Similar to Protein kinase	-	-	-	-	GO:0005886//plasma membrane;GO:0016020//membrane;GO:0016021//integral component of membrane	GO:0000166//nucleotide binding;GO:0004672//protein kinase activity;GO:0004674//protein serine/threonine kinase activity;GO:0005509//calcium ion binding;GO:0005524//ATP binding	GO:0006468//protein phosphorylation;GO:0007166//cell surface receptor signaling pathway
Os12g0624000	635	169	509	3550	2596	3529	7.16	1.76	5.51	36.64	28.22	46.3	4.81	37.0533	2.94549	7.69682e-12	8.49414e-10	-	Similar to Methionine synthase protein	Metabolism;Metabolism;Metabolism;Metabolism;Metabolism	Global and overview maps;Global and overview maps;Global and overview maps;Amino acid metabolism;Metabolism of other amino acids	ko01100//Metabolic pathways;ko01110//Biosynthesis of secondary metabolites;ko01230//Biosynthesis of amino acids;ko00270//Cysteine and methionine metabolism;ko00450//Selenocompound metabolism	K00549;K00549;K00549;K00549;K00549	GO:0005737//cytoplasm;GO:0005829//cytosol	GO:0003871//5-methyltetrahydropteroyltriglutamate-homocysteine S-methyltransferase activity;GO:0008168//methyltransferase activity;GO:0008270//zinc ion binding;GO:0016740//transferase activity;GO:0046872//metal ion binding	GO:0008652//cellular amino acid biosynthetic process;GO:0009086//methionine biosynthetic process;GO:0032259//methylation
Os08g0189600	2	0	7	263	205	125	0.06	0	0.2	7.32	5.98	4.41	0.0866667	5.90333	6.08991	8.91823e-12	9.788e-10	GLP8-7	Germin-like protein 8-7, Disease resistanc	-	-	-	-	GO:0005576//extracellular region;GO:0005618//cell wall;GO:0048046//apoplast	GO:0030145//manganese ion binding;GO:0045735//nutrient reservoir activity;GO:0046872//metal ion binding	-
Os07g0695800	201	60	155	932	1265	841	1.68	0.46	1.25	7.18	10.55	8.58	1.13	8.77	2.95625	9.21199e-12	1.00552e-09	-	Similar to 2-oxoglutarate dehydrogenase, E1 component	Metabolism;Metabolism;Metabolism;Metabolism	Global and overview maps;Global and overview maps;Global and overview maps;Carbohydrate metabolism	ko01100//Metabolic pathways;ko01110//Biosynthesis of secondary metabolites;ko01200//Carbon metabolism;ko00020//Citrate cycle (TCA cycle)	K00164;K00164;K00164;K00164	GO:0005739//mitochondrion;GO:0045252//oxoglutarate dehydrogenase complex	GO:0004591//oxoglutarate dehydrogenase (succinyl-transferring) activity;GO:0016624//oxidoreductase activity, acting on the aldehyde or oxo group of donors, disulfide as acceptor;GO:0030976//thiamine pyrophosphate binding	GO:0006099//tricarboxylic acid cycle;GO:0055114//oxidation-reduction process
Os04g0693000	288	141	328	1581	1734	1413	5.47	2.57	6.05	27.98	32.86	30.88	4.69667	30.5733	2.70256	9.44838e-12	1.02571e-09	-	Similar to Ribophorin I (Fragment)	Metabolism;Genetic Information Processing;Metabolism;Metabolism	Global and overview maps;Folding, sorting and degradation;Glycan biosynthesis and metabolism;Glycan biosynthesis and metabolism	ko01100//Metabolic pathways;ko04141//Protein processing in endoplasmic reticulum;ko00510//N-Glycan biosynthesis;ko00513//Various types of N-glycan biosynthesis	K12666;K12666;K12666;K12666	GO:0005774//vacuolar membrane;GO:0005783//endoplasmic reticulum;GO:0005789//endoplasmic reticulum membrane;GO:0005886//plasma membrane;GO:0009505//plant-type cell wall;GO:0016020//membrane;GO:0016021//integral component of membrane	GO:0004579//dolichyl-diphosphooligosaccharide-protein glycotransferase activity	GO:0006486//protein glycosylation;GO:0006487//protein N-linked glycosylation
Os11g0127900	46	25	86	569	760	544	1.72	0.85	3.07	19.43	27.23	23.51	1.88	23.39	3.63709	9.75763e-12	1.05356e-09	OsRP1	Similar to 40S ribosomal protein S16	Genetic Information Processing	Translation	ko03010//Ribosome	K02960	GO:0005737//cytoplasm;GO:0005840//ribosome;GO:0015935//small ribosomal subunit;GO:0022627//cytosolic small ribosomal subunit	GO:0003723//RNA binding;GO:0003735//structural constituent of ribosome	GO:0000462//maturation of SSU-rRNA from tricistronic rRNA transcript (SSU-rRNA, 5.8S rRNA, LSU-rRNA);GO:0006412//translation
Os03g0182600	194	33	185	1276	1678	1429	4.38	0.68	4.04	26.53	36.58	37.61	3.03333	33.5733	3.46834	1.0655e-11	1.14173e-09	-	Ribosomal protein S2 family protein	Genetic Information Processing	Translation	ko03010//Ribosome	K02998	GO:0005737//cytoplasm;GO:0005840//ribosome;GO:0015935//small ribosomal subunit;GO:0022627//cytosolic small ribosomal subunit	GO:0003735//structural constituent of ribosome	GO:0000028//ribosomal small subunit assembly;GO:0000447//endonucleolytic cleavage in ITS1 to separate SSU-rRNA from 5.8S rRNA and LSU-rRNA from tricistronic rRNA transcript (SSU-rRNA, 5.8S rRNA, LSU-rRNA);GO:0000461//endonucleolytic cleavage to generate mature 3'-end of SSU-rRNA from (SSU-rRNA, 5.8S rRNA, LSU-rRNA);GO:0002181//cytoplasmic translation;GO:0006407//rRNA export from nucleus;GO:000641…
Os04g0578000	0	0	10	244	313	265	0	0	0.14	3.16	4.25	4.35	0.0466667	3.92	6.39232	1.06886e-11	1.14173e-09	ACS2	ACC synthase, Ethylene biosynthesi	Metabolism;Metabolism;Environmental Information Processing;Metabolism	Global and overview maps;Global and overview maps;Signal transduction;Amino acid metabolism	ko01100//Metabolic pathways;ko01110//Biosynthesis of secondary metabolites;ko04016//MAPK signaling pathway - plant;ko00270//Cysteine and methionine metabolism	K20772;K20772;K20772;K20772	-	GO:0003824//catalytic activity;GO:0030170//pyridoxal phosphate binding	GO:0009058//biosynthetic process
Os11g0592000	23	4	6	614	150	595	0.92	0.15	0.23	22.6	5.79	27.72	0.433333	18.7033	5.43167	1.08754e-11	1.15552e-09	OsPR4c	Similar to Barwin	-	-	-	-	-	-	GO:0042742//defense response to bacterium;GO:0050832//defense response to fungus
Os02g0240100	22	15	29	232	343	300	0.49	0.31	0.63	4.78	7.41	7.83	0.476667	6.67333	3.80735	1.186e-11	1.25346e-09	prx30	Similar to Peroxidase 2 (Fragment)	Metabolism;Metabolism;Metabolism	Global and overview maps;Global and overview maps;Biosynthesis of other secondary metabolites	ko01100//Metabolic pathways;ko01110//Biosynthesis of secondary metabolites;ko00940//Phenylpropanoid biosynthesis	K00430;K00430;K00430	GO:0005576//extracellular region	GO:0004601//peroxidase activity;GO:0016491//oxidoreductase activity;GO:0020037//heme binding;GO:0046872//metal ion binding	GO:0006979//response to oxidative stress;GO:0042744//hydrogen peroxide catabolic process;GO:0055114//oxidation-reduction process;GO:0098869//cellular oxidant detoxification
Os12g0571200	15	6	15	160	325	207	0.69	0.26	0.67	6.83	14.53	11.18	0.54	10.8467	4.32815	1.19947e-11	1.26102e-09	-	Similar to Mitochondrial import inner membrane translocase subunit Tim9	-	-	-	-	GO:0005739//mitochondrion;GO:0005743//mitochondrial inner membrane;GO:0016020//membrane;GO:0042719//mitochondrial intermembrane space protein transporter complex;GO:0042721//mitochondrial inner membrane protein insertion complex	GO:0046872//metal ion binding	GO:0015031//protein transport;GO:0045039//protein import into mitochondrial inner membrane
Os04g0184100	8	4	4	232	111	266	0.13	0.06	0.06	3.54	1.77	5.13	0.0833333	3.48	5.38405	1.31357e-11	1.36659e-09	-	Similar to OSIGBa0140C02.7 protein	Metabolism;Metabolism;Metabolism;Metabolism	Global and overview maps;Amino acid metabolism;Amino acid metabolism;Amino acid metabolism	ko01100//Metabolic pathways;ko00380//Tryptophan metabolism;ko00330//Arginine and proline metabolism;ko00360//Phenylalanine metabolism	K01426;K01426;K01426;K01426	-	-	-
Os05g0453300	306	104	179	78	92	90	3.7	1.16	2.1	0.87	1.08	1.27	2.32	1.07333	-1.11203	1.48169e-11	1.51456e-09	-	Conserved hypothetical protein	-	-	-	-	-	-	-
Os08g0538000	27	10	35	277	291	272	0.45	0.19	0.72	4.24	5.26	5.38	0.453333	4.96	3.4517	1.4834e-11	1.51456e-09	-	Similar to Glycyl-tRNA synthetase, mitochondrial precursor (EC 6.1.1.14) (Glycine--tRNA ligase) (GlyRS)	Genetic Information Processing	Translation	ko00970//Aminoacyl-tRNA biosynthesis	K01880	GO:0005737//cytoplasm;GO:0005739//mitochondrion	GO:0000166//nucleotide binding;GO:0004812//aminoacyl-tRNA ligase activity;GO:0004820//glycine-tRNA ligase activity;GO:0005524//ATP binding	GO:0006418//tRNA aminoacylation for protein translation;GO:0006426//glycyl-tRNA aminoacylation;GO:0070150//mitochondrial glycyl-tRNA aminoacylation
Os11g0672300	555	243	596	2506	2841	2380	9.01	3.62	9.36	37.46	44.52	45.03	7.33	42.3367	2.53002	1.48612e-11	1.51456e-09	-	Similar to Protein kinase domain containing protein, expressed	-	-	-	-	-	-	GO:0007166//cell surface receptor signaling pathway
Os02g0519900	3022	916	3491	17574	19868	15787	34.69	9.31	36.43	170.8	209.15	200.37	26.81	193.44	2.85104	1.59171e-11	1.61393e-09	-	Similar to Elongation factor EF-2 (Fragment)	-	-	-	-	GO:0005829//cytosol;GO:1990904//ribonucleoprotein complex	GO:0003746//translation elongation factor activity;GO:0003924//GTPase activity;GO:0005525//GTP binding;GO:0043022//ribosome binding	GO:0006414//translational elongation
Os02g0654700	59	23	16	496	567	454	1.35	0.48	0.35	10.44	12.51	12.1	0.726667	11.6833	4.00701	1.63676e-11	1.65122e-09	ERF91	AP2/ERF family protein, Abiotic stress respons	-	-	-	-	GO:0005634//nucleus	GO:0003677//DNA binding;GO:0003700//transcription factor activity, sequence-specific DNA binding	GO:0006355//regulation of transcription, DNA-templated
Os10g0558750	41	11	201	3589	2884	2718	0.9	0.22	4.28	72.81	61.32	69.79	1.8	67.9733	5.2389	1.66452e-11	1.67079e-09	-	Similar to Oxidoreductase, 2OG-Fe oxygenase family protein, expressed	-	-	-	-	-	GO:0016491//oxidoreductase activity;GO:0046872//metal ion binding	GO:0055114//oxidation-reduction process
Os04g0675500	121	77	102	888	1178	726	1.28	0.75	1.04	8.62	11.98	8.92	1.02333	9.84	3.26538	1.71818e-11	1.71604e-09	Stt3a	Similar to Itm1 protein	Metabolism;Genetic Information Processing;Metabolism;Metabolism	Global and overview maps;Folding, sorting and degradation;Glycan biosynthesis and metabolism;Glycan biosynthesis and metabolism	ko01100//Metabolic pathways;ko04141//Protein processing in endoplasmic reticulum;ko00510//N-Glycan biosynthesis;ko00513//Various types of N-glycan biosynthesis	K07151;K07151;K07151;K07151	GO:0005783//endoplasmic reticulum;GO:0005789//endoplasmic reticulum membrane;GO:0005886//plasma membrane;GO:0016020//membrane;GO:0016021//integral component of membrane	GO:0004576//oligosaccharyl transferase activity;GO:0016740//transferase activity;GO:0016757//transferase activity, transferring glycosyl groups;GO:0046872//metal ion binding	GO:0006486//protein glycosylation
Os04g0685400	25	11	25	291	314	196	0.7	0.29	0.7	7.67	8.76	6.53	0.563333	7.65333	3.76403	2.03375e-11	2.0111e-09	-	Harpin-induced 1 domain containing protein	-	-	-	-	GO:0009506//plasmodesma;GO:0016020//membrane;GO:0016021//integral component of membrane;GO:0046658//anchored component of plasma membrane	-	-
Os01g0198900	780	448	621	225	247	381	24.04	12.51	18.32	6.24	7.22	13.63	18.29	9.03	-1.01826	2.26437e-11	2.22812e-09	-	Polyketide cyclase/dehydrase domain containing protein	-	-	-	-	-	-	-
Os03g0802500	306	103	160	1588	1488	1170	4.99	1.54	2.52	23.85	23.42	22.24	3.01667	23.17	2.94123	2.45606e-11	2.39399e-09	-	ATPase, AAA-type, core domain containing protein	-	-	-	-	GO:0016020//membrane;GO:0016021//integral component of membrane	GO:0000166//nucleotide binding;GO:0005524//ATP binding	-
Os06g0336200	728	293	406	80	120	218	17.8	6.59	9.62	1.8	2.9	6.21	11.3367	3.63667	-1.64031	2.45967e-11	2.39399e-09	OsTIP2	Delta-tonoplast intrinsic protein	-	-	-	-	GO:0005773//vacuole;GO:0005774//vacuolar membrane;GO:0016020//membrane;GO:0016021//integral component of membrane	GO:0015250//water channel activity;GO:0015267//channel activity	GO:0006833//water transport;GO:0055085//transmembrane transport
Os06g0554600	97	55	68	12	17	19	2.36	1.23	1.6	0.27	0.4	0.54	1.73	0.403333	-2.10073	2.46889e-11	2.39399e-09	-	Conserved hypothetical protein	-	-	-	-	-	-	-
Os03g0577000	163	48	118	728	1184	745	4.47	1.21	3.14	18.37	31.31	23.8	2.94	24.4933	3.0585	2.62741e-11	2.53539e-09	-	Similar to Ribosomal protein S3 (Fragment)	Genetic Information Processing	Translation	ko03010//Ribosome	K02985	GO:0005634//nucleus;GO:0005840//ribosome;GO:0015935//small ribosomal subunit;GO:0022627//cytosolic small ribosomal subunit	GO:0003684//damaged DNA binding;GO:0003723//RNA binding;GO:0003735//structural constituent of ribosome;GO:0003906//DNA-(apurinic or apyrimidinic site) lyase activity;GO:0008534//oxidized purine nucleobase lesion DNA N-glycosylase activity;GO:0032357//oxidized purine DNA binding	GO:0006281//DNA repair;GO:0006412//translation;GO:0045739//positive regulation of DNA repair
Os11g0482000	241	51	206	1208	1466	1308	8.09	1.57	6.69	37.37	47.53	51.21	5.45	45.37	3.05741	2.81555e-11	2.70387e-09	RPS5A	Similar to 40S ribosomal protein S5	Genetic Information Processing	Translation	ko03010//Ribosome	K02989	GO:0005840//ribosome;GO:0015935//small ribosomal subunit;GO:0022627//cytosolic small ribosomal subunit	GO:0003723//RNA binding;GO:0003729//mRNA binding;GO:0003735//structural constituent of ribosome;GO:0019843//rRNA binding	GO:0000028//ribosomal small subunit assembly;GO:0006412//translation
Os01g0926300	65	32	49	392	390	410	1.21	0.54	0.88	6.7	7	8.89	0.876667	7.53	3.10255	3.04364e-11	2.90893e-09	-	Similar to Transaldolase (EC 2.2.1.2)	Metabolism;Metabolism;Metabolism;Metabolism;Metabolism	Global and overview maps;Global and overview maps;Global and overview maps;Global and overview maps;Carbohydrate metabolism	ko01100//Metabolic pathways;ko01110//Biosynthesis of secondary metabolites;ko01200//Carbon metabolism;ko01230//Biosynthesis of amino acids;ko00030//Pentose phosphate pathway	K00616;K00616;K00616;K00616;K00616	GO:0005737//cytoplasm;GO:0005739//mitochondrion;GO:0009507//chloroplast;GO:0009536//plastid;GO:0009570//chloroplast stroma	GO:0003824//catalytic activity;GO:0004801//sedoheptulose-7-phosphate:D-glyceraldehyde-3-phosphate glyceronetransferase activity	GO:0005975//carbohydrate metabolic process;GO:0006098//pentose-phosphate shunt;GO:0009809//lignin biosynthetic process;GO:0033587//shikimate biosynthetic process;GO:0046686//response to cadmium ion
Os07g0597200	104	22	104	612	799	962	0.8	0.16	0.79	4.48	6.06	8.9	0.583333	6.48	3.4736	3.12458e-11	2.97207e-09	-	Protein kinase, core domain containing protein	-	-	-	-	GO:0005739//mitochondrion;GO:0005886//plasma membrane;GO:0016020//membrane;GO:0016021//integral component of membrane	GO:0000166//nucleotide binding;GO:0004672//protein kinase activity;GO:0004674//protein serine/threonine kinase activity;GO:0005515//protein binding;GO:0005524//ATP binding;GO:0016301//kinase activity;GO:0016740//transferase activity	GO:0002215//defense response to nematode;GO:0006468//protein phosphorylation;GO:0009825//multidimensional cell growth;GO:0009845//seed germination;GO:0016310//phosphorylation
Os02g0532500	194	134	335	2228	3070	1676	5.81	3.68	9.7	61.42	88.71	58.47	6.39667	69.5333	3.44231	3.14109e-11	2.97362e-09	OsGLP2-1	Germin-like protein, Fungal blast and bacterial blight resistanc	-	-	-	-	GO:0005576//extracellular region;GO:0005618//cell wall;GO:0048046//apoplast	GO:0030145//manganese ion binding;GO:0045735//nutrient reservoir activity;GO:0046872//metal ion binding	-
Os08g0116500	287	50	226	1535	2022	1603	13.5	2.16	10.29	66.53	91.85	87.92	8.65	82.1	3.24661	3.16987e-11	2.98671e-09	-	Similar to 60S acidic ribosomal protein P1 (L12)	Genetic Information Processing	Translation	ko03010//Ribosome	K02942	GO:0005840//ribosome;GO:0022625//cytosolic large ribosomal subunit	GO:0003735//structural constituent of ribosome;GO:0030295//protein kinase activator activity;GO:0043021//ribonucleoprotein complex binding	GO:0002181//cytoplasmic translation;GO:0006414//translational elongation;GO:0032147//activation of protein kinase activity
Os06g0294600	38	8	49	583	511	321	0.65	0.13	0.81	9.15	8.4	6.37	0.53	7.97333	3.91112	3.25323e-11	3.05085e-09	-	Cytochrome P450 family protein	-	-	-	-	GO:0016020//membrane;GO:0016021//integral component of membrane	GO:0004497//monooxygenase activity;GO:0005506//iron ion binding;GO:0016491//oxidoreductase activity;GO:0016705//oxidoreductase activity, acting on paired donors, with incorporation or reduction of molecular oxygen;GO:0016709//oxidoreductase activity, acting on paired donors, with incorporation or reduction of molecular oxygen, NAD(P)H as one donor, and incorporation of one atom of oxygen;GO:00200…	GO:0055114//oxidation-reduction process
Os12g0167900	595	140	613	3709	4249	3089	12.03	2.6	11.99	69.1	82.96	72.83	8.87333	74.9633	3.07864	3.59872e-11	3.35909e-09	RPL3A	Ribosomal protein L3	Genetic Information Processing	Translation	ko03010//Ribosome	K02925	GO:0005737//cytoplasm;GO:0005840//ribosome;GO:0022625//cytosolic large ribosomal subunit	GO:0003723//RNA binding;GO:0003735//structural constituent of ribosome	GO:0000027//ribosomal large subunit assembly;GO:0006412//translation
Os04g0444800	28083	8653	19223	6612	3226	8600	320.22	90.62	212.58	69.64	35.72	114.62	207.807	73.3267	-1.50283	3.90371e-11	3.62682e-09	OsFRO7	Ferric reductase-like transmembrane component family protein	-	-	-	-	GO:0005886//plasma membrane;GO:0016020//membrane;GO:0016021//integral component of membrane	GO:0016491//oxidoreductase activity	GO:0055114//oxidation-reduction process
Os02g0176300	19	5	11	188	223	159	0.29	0.07	0.16	2.6	3.23	2.78	0.173333	2.87	4.04943	4.08773e-11	3.7802e-09	-	Hypothetical protein	-	-	-	-	-	-	-
Os05g0227700	257	71	243	1191	1682	1252	3.92	0.99	3.58	16.73	24.74	22.24	2.83	21.2367	2.90768	4.25473e-11	3.91651e-09	eIF-3l	Similar to Eukaryotic translation initiation factor 3 subunit 6-interacting protein	-	-	-	-	GO:0005737//cytoplasm;GO:0005852//eukaryotic translation initiation factor 3 complex;GO:0016282//eukaryotic 43S preinitiation complex;GO:0033290//eukaryotic 48S preinitiation complex	GO:0003743//translation initiation factor activity	GO:0001732//formation of cytoplasmic translation initiation complex;GO:0002183//cytoplasmic translational initiation;GO:0006412//translation;GO:0006413//translational initiation
Os01g0850550	1	1	5	306	106	165	0.02	0.02	0.08	4.69	1.71	3.2	0.04	3.2	6.32193	4.46404e-11	4.09033e-09	OsLAC7	Similar to Laccase-6	-	-	-	-	GO:0005576//extracellular region;GO:0005886//plasma membrane;GO:0048046//apoplast	GO:0004322//ferroxidase activity;GO:0005507//copper ion binding;GO:0016491//oxidoreductase activity;GO:0016722//oxidoreductase activity, oxidizing metal ions;GO:0046872//metal ion binding;GO:0052716//hydroquinone:oxygen oxidoreductase activity	GO:0006826//iron ion transport;GO:0046274//lignin catabolic process;GO:0055072//iron ion homeostasis;GO:0055114//oxidation-reduction process
Os06g0297400	21	10	72	639	1084	589	0.18	0.08	0.58	4.89	8.69	5.7	0.28	6.42667	4.52057	4.92335e-11	4.47475e-09	-	Conserved hypothetical protein	-	-	-	-	GO:0016020//membrane;GO:0016021//integral component of membrane	-	-
Os01g0328400	108	24	109	650	947	684	4.04	0.82	3.94	22.39	34.19	29.82	2.93333	28.8	3.29546	4.92839e-11	4.47475e-09	RPS27a	Ubiquitin	Genetic Information Processing	Translation	ko03010//Ribosome	K02977	GO:0005634//nucleus;GO:0005737//cytoplasm;GO:0005840//ribosome	GO:0003735//structural constituent of ribosome;GO:0005515//protein binding;GO:0031386//protein tag;GO:0031625//ubiquitin protein ligase binding;GO:0046872//metal ion binding	GO:0006412//translation;GO:0016567//protein ubiquitination;GO:0019941//modification-dependent protein catabolic process
Os10g0563700	3	4	6	143	247	122	0.12	0.15	0.24	5.34	9.66	5.76	0.17	6.92	5.34717	4.98501e-11	4.50568e-09	-	Similar to Nucleoside diphosphate kinase I (EC 2.7.4.6) (NDK I) (NDP kinase I) (PP18)	Metabolism;Metabolism;Environmental Information Processing;Metabolism;Metabolism	Global and overview maps;Global and overview maps;Signal transduction;Nucleotide metabolism;Nucleotide metabolism	ko01100//Metabolic pathways;ko01110//Biosynthesis of secondary metabolites;ko04016//MAPK signaling pathway - plant;ko00230//Purine metabolism;ko00240//Pyrimidine metabolism	K00940;K00940;K00940;K00940;K00940	-	GO:0000166//nucleotide binding;GO:0004550//nucleoside diphosphate kinase activity;GO:0005524//ATP binding;GO:0016301//kinase activity;GO:0016740//transferase activity	GO:0006163//purine nucleotide metabolic process;GO:0006165//nucleoside diphosphate phosphorylation;GO:0006183//GTP biosynthetic process;GO:0006220//pyrimidine nucleotide metabolic process;GO:0006228//UTP biosynthetic process;GO:0006241//CTP biosynthetic process;GO:0016310//phosphorylation
Os09g0400000	16	1	11	238	375	150	0.37	0.02	0.24	4.96	8.2	3.96	0.21	5.70667	4.76419	5.65716e-11	5.00008e-09	OsCAD8B	Cinnamyl alcohol dehydrogenase (EC 1.1.1.195)	Metabolism;Metabolism;Metabolism	Global and overview maps;Global and overview maps;Biosynthesis of other secondary metabolites	ko01100//Metabolic pathways;ko01110//Biosynthesis of secondary metabolites;ko00940//Phenylpropanoid biosynthesis	K00083;K00083;K00083	-	GO:0008270//zinc ion binding;GO:0016491//oxidoreductase activity;GO:0016616//oxidoreductase activity, acting on the CH-OH group of donors, NAD or NADP as acceptor;GO:0045551//cinnamyl-alcohol dehydrogenase activity;GO:0046872//metal ion binding;GO:0052747//sinapyl alcohol dehydrogenase activity	GO:0009699//phenylpropanoid biosynthetic process;GO:0009809//lignin biosynthetic process;GO:0055114//oxidation-reduction process
Os10g0137300	1	0	0	197	234	211	0.06	0	0	10.9	13.55	14.75	0.02	13.0667	9.35168	5.74502e-11	5.05536e-09	-	Similar to BLN1-1	-	-	-	-	-	-	-
Os01g0547600	302	216	101	39	13	36	5.07	3.33	1.64	0.6	0.21	0.7	3.34667	0.503333	-2.73314	5.82738e-11	5.10534e-09	NRT2.4	High-affinity nitrate transporter, Nitrate transport, Auxin signalin	Metabolism	Energy metabolism	ko00910//Nitrogen metabolism	K02575	GO:0005886//plasma membrane;GO:0009705//plant-type vacuole membrane;GO:0016020//membrane;GO:0016021//integral component of membrane	GO:0015112//nitrate transmembrane transporter activity	GO:0015706//nitrate transport;GO:0042128//nitrate assimilation;GO:0055085//transmembrane transport;GO:0071249//cellular response to nitrate
Os03g0408300	61	17	86	600	806	488	2.48	0.64	3.39	22.49	31.69	23.17	2.17	25.7833	3.57067	6.00666e-11	5.23943e-09	-	Similar to 60S ribosomal protein L27a-3	Genetic Information Processing	Translation	ko03010//Ribosome	K02900	GO:0005840//ribosome;GO:0015934//large ribosomal subunit;GO:0022625//cytosolic large ribosomal subunit	GO:0003735//structural constituent of ribosome	GO:0006412//translation
Os03g0746700	287	184	146	42	15	54	5.54	3.26	2.73	0.75	0.28	1.22	3.84333	0.75	-2.3574	6.19484e-11	5.38008e-09	-	Conserved hypothetical protein	-	-	-	-	-	-	-
Os06g0200700	7	0	4	131	199	122	0.08	0	0.05	1.42	2.26	1.67	0.0433333	1.78333	5.36296	6.53456e-11	5.65056e-09	-	Hypothetical protein	-	-	-	-	-	-	-
Os05g0477300	164	54	136	632	965	911	5.15	1.56	4.13	18.27	29.24	33.33	3.61333	26.9467	2.8987	6.59669e-11	5.67264e-09	-	Ribosomal protein S26e domain containing protein	Genetic Information Processing	Translation	ko03010//Ribosome	K02976	GO:0005840//ribosome;GO:0022627//cytosolic small ribosomal subunit	GO:0003729//mRNA binding;GO:0003735//structural constituent of ribosome	GO:0006412//translation
Os06g0586000	7	0	20	320	249	410	0.42	0	1.15	17.57	14.33	28.49	0.523333	20.13	5.26547	6.6169e-11	5.67264e-09	-	Conserved hypothetical protein	-	-	-	-	-	-	-
Os01g0723200	63	11	23	362	555	385	2.39	0.38	0.85	12.69	20.39	17.08	1.20667	16.72	3.79248	6.84245e-11	5.81608e-09	OsRPS24	Similar to 40S ribosomal protein S19-like	Genetic Information Processing	Translation	ko03010//Ribosome	K02974	GO:0005840//ribosome	GO:0003735//structural constituent of ribosome	GO:0006412//translation
Os03g0424800	73	41	83	520	704	459	3.04	1.56	3.35	19.93	28.25	22.27	2.65	23.4833	3.14757	6.87949e-11	5.82279e-09	-	Similar to 40S ribosomal protein S19-3	Genetic Information Processing	Translation	ko03010//Ribosome	K02966	GO:0005840//ribosome;GO:0022627//cytosolic small ribosomal subunit	GO:0003723//RNA binding;GO:0003735//structural constituent of ribosome	GO:0000028//ribosomal small subunit assembly;GO:0006412//translation
Os05g0358500	645	375	322	186	131	180	12.83	6.9	6.28	3.35	2.41	4.11	8.67	3.29	-1.39794	7.41548e-11	6.24997e-09	OsPP2C48	Protein phosphatase 2C domain containing protein	-	-	-	-	-	GO:0003824//catalytic activity;GO:0004721//phosphoprotein phosphatase activity;GO:0004722//protein serine/threonine phosphatase activity;GO:0004724//magnesium-dependent protein serine/threonine phosphatase activity;GO:0016787//hydrolase activity;GO:0046872//metal ion binding	GO:0006470//protein dephosphorylation
Os12g0623900	2635	601	1757	13272	9827	12028	30.37	6.26	19.36	139.16	108.1	159.94	18.6633	135.733	2.8625	7.62536e-11	6.39986e-09	-	Similar to Ethylene-responsive methionine synthase (Fragment)	Metabolism;Metabolism;Metabolism;Metabolism;Metabolism	Global and overview maps;Global and overview maps;Global and overview maps;Amino acid metabolism;Metabolism of other amino acids	ko01100//Metabolic pathways;ko01110//Biosynthesis of secondary metabolites;ko01230//Biosynthesis of amino acids;ko00270//Cysteine and methionine metabolism;ko00450//Selenocompound metabolism	K00549;K00549;K00549;K00549;K00549	GO:0005737//cytoplasm;GO:0005829//cytosol	GO:0003871//5-methyltetrahydropteroyltriglutamate-homocysteine S-methyltransferase activity;GO:0008168//methyltransferase activity;GO:0008270//zinc ion binding;GO:0016740//transferase activity;GO:0046872//metal ion binding	GO:0008652//cellular amino acid biosynthetic process;GO:0009086//methionine biosynthetic process;GO:0032259//methylation
Os07g0641700	39	11	26	239	312	246	2.47	0.52	1.58	14.77	16.9	18.95	1.52333	16.8733	3.46944	7.69486e-11	6.42452e-09	-	Similar to 10 kDa chaperonin (Protein CPN10) (Protein groES)	-	-	-	-	GO:0005737//cytoplasm;GO:0005759//mitochondrial matrix	GO:0046872//metal ion binding;GO:0051082//unfolded protein binding;GO:0051087//chaperone binding	GO:0006457//protein folding;GO:0051085//chaperone mediated protein folding requiring cofactor
Os09g0258600	212	32	231	1685	2457	1668	6.87	0.95	7.25	50.41	77.06	63.15	5.02333	63.54	3.66095	7.71907e-11	6.42452e-09	rpl22	Similar to 60S ribosomal protein L17-1	Genetic Information Processing	Translation	ko03010//Ribosome	K02880	GO:0005840//ribosome;GO:0015934//large ribosomal subunit;GO:0022625//cytosolic large ribosomal subunit	GO:0003735//structural constituent of ribosome	GO:0002181//cytoplasmic translation;GO:0006412//translation
Os12g0471100	2	0	0	296	185	136	0.03	0	0	4.43	2.9	2.57	0.01	3.3	8.36632	8.19985e-11	6.76827e-09	-	Similar to ATPase 2	-	-	-	-	-	GO:0005524//ATP binding	GO:0051301//cell division
Os11g0229400	33	19	47	335	414	296	0.32	0.17	0.44	2.96	3.83	3.31	0.31	3.36667	3.44098	8.27835e-11	6.80494e-09	-	Similar to NBS-LRR protein (Fragment)	Organismal Systems	Environmental adaptation	ko04626//Plant-pathogen interaction	K13457	-	GO:0000166//nucleotide binding;GO:0005524//ATP binding;GO:0043531//ADP binding	GO:0006952//defense response
Os05g0244500	327	140	248	51	47	113	8.9	3.63	6.97	1.47	0.89	2.5	6.5	1.62	-2.00445	8.38398e-11	6.86353e-09	-	Glycoside hydrolase, family 5 protein	-	-	-	-	GO:0005737//cytoplasm	GO:0004553//hydrolase activity, hydrolyzing O-glycosyl compounds;GO:0016787//hydrolase activity;GO:0016798//hydrolase activity, acting on glycosyl bonds;GO:0051015//actin filament binding	GO:0005975//carbohydrate metabolic process;GO:0007015//actin filament organization;GO:0007163//establishment or maintenance of cell polarity;GO:0008152//metabolic process;GO:0016477//cell migration;GO:0051017//actin filament bundle assembly
Os08g0326600	6	8	20	225	319	229	0.09	0.11	0.29	3.1	4.6	3.99	0.163333	3.89667	4.57635	8.97762e-11	7.31951e-09	-	Similar to GMP synthetase	Metabolism;Metabolism	Global and overview maps;Nucleotide metabolism	ko01100//Metabolic pathways;ko00230//Purine metabolism	K01951;K01951	GO:0005829//cytosol	GO:0000166//nucleotide binding;GO:0003921//GMP synthase activity;GO:0003922//GMP synthase (glutamine-hydrolyzing) activity;GO:0005524//ATP binding;GO:0016462//pyrophosphatase activity	GO:0006164//purine nucleotide biosynthetic process;GO:0006177//GMP biosynthetic process;GO:0006541//glutamine metabolic process
Os09g0572000	0	1	2	136	413	119	0	0.03	0.07	4.57	14.61	5.06	0.0333333	8.08	7.92125	9.02308e-11	7.32667e-09	OsERF#087	Pathogenesis-related transcriptional factor and ERF domain containing protein	Environmental Information Processing;Environmental Information Processing	Signal transduction;Signal transduction	ko04075//Plant hormone signal transduction;ko04016//MAPK signaling pathway - plant	K14516;K14516	GO:0005634//nucleus	GO:0003677//DNA binding;GO:0003700//transcription factor activity, sequence-specific DNA binding	GO:0006355//regulation of transcription, DNA-templated
Os03g0755700	0	0	0	137	188	89	0	0	0	5.45	7.86	4.46	0.001	5.92333	12.5322	9.10787e-11	7.36558e-09	-	Similar to Ribosomal protein L13a	Genetic Information Processing	Translation	ko03010//Ribosome	K02872	GO:0005840//ribosome;GO:0022625//cytosolic large ribosomal subunit	GO:0003729//mRNA binding;GO:0003735//structural constituent of ribosome	GO:0006412//translation;GO:0017148//negative regulation of translation
Os06g0189600	34	23	27	288	391	286	0.51	0.34	0.4	4.06	5.79	5.09	0.416667	4.98	3.57918	9.19292e-11	7.40437e-09	-	Hypothetical conserved gene	-	-	-	-	-	-	-
Os02g0534800	115	31	150	851	1144	820	3.74	0.93	4.72	25.52	35.95	31.12	3.13	30.8633	3.30166	9.34275e-11	7.49484e-09	-	Similar to 40S ribosomal protein S14 (Clone MCH2)	Genetic Information Processing	Translation	ko03010//Ribosome	K02955	GO:0005840//ribosome;GO:0022627//cytosolic small ribosomal subunit	GO:0003735//structural constituent of ribosome;GO:0048027//mRNA 5'-UTR binding;GO:0070181//small ribosomal subunit rRNA binding	GO:0000028//ribosomal small subunit assembly;GO:0000462//maturation of SSU-rRNA from tricistronic rRNA transcript (SSU-rRNA, 5.8S rRNA, LSU-rRNA);GO:0006412//translation
Os07g0111900	825	372	437	56	39	184	17.11	7.09	8.77	1.07	0.78	4.45	10.99	2.1	-2.38773	1.03397e-10	8.26142e-09	-	Flavin-containing monooxygenase FMO family protein	-	-	-	-	-	GO:0004497//monooxygenase activity;GO:0004499//N,N-dimethylaniline monooxygenase activity;GO:0016491//oxidoreductase activity;GO:0050660//flavin adenine dinucleotide binding;GO:0050661//NADP binding	GO:0055114//oxidation-reduction process
Os02g0270200	0	0	2	231	184	137	0	0	0.02	2.66	2.22	1.99	0.00666667	2.29	8.42417	1.04732e-10	8.30484e-09	OsSub14	Similar to Subtilase	-	-	-	-	-	GO:0004252//serine-type endopeptidase activity;GO:0008233//peptidase activity;GO:0008236//serine-type peptidase activity;GO:0016787//hydrolase activity	GO:0006508//proteolysis
Os04g0366000	8	2	25	214	434	344	0.11	0.03	0.34	2.78	5.91	5.65	0.16	4.78	4.90087	1.11971e-10	8.84039e-09	-	Similar to OSIGBa0110B10.6 protein	-	-	-	-	GO:0005886//plasma membrane;GO:0016020//membrane;GO:0016021//integral component of membrane	GO:0004672//protein kinase activity;GO:0004674//protein serine/threonine kinase activity;GO:0005509//calcium ion binding;GO:0005524//ATP binding	GO:0006468//protein phosphorylation;GO:0007166//cell surface receptor signaling pathway
Os06g0323100	0	0	0	121	341	76	0	0	0	2.55	7.55	2.05	0.001	4.05	11.9837	1.14891e-10	9.03521e-09	-	Similar to H1005F08.18 protein	-	-	-	-	-	GO:0008168//methyltransferase activity;GO:0008757//S-adenosylmethionine-dependent methyltransferase activity	GO:0032259//methylation
Os10g0411800	102	65	145	835	1013	725	4.11	2.41	5.66	31.03	39.45	34.09	4.06	34.8567	3.10188	1.16122e-10	9.0962e-09	-	Similar to 40S ribosomal protein S17-3	Genetic Information Processing	Translation	ko03010//Ribosome	K02962	GO:0005840//ribosome	GO:0003735//structural constituent of ribosome	GO:0006412//translation
Os08g0389700	777	477	565	257	213	358	14	8.46	10.69	4.15	3.54	7.66	11.05	5.11667	-1.11077	1.23315e-10	9.60933e-09	-	Conserved hypothetical protein	-	-	-	-	GO:0016020//membrane;GO:0016021//integral component of membrane;GO:0031464//Cul4A-RING E3 ubiquitin ligase complex	-	GO:0016567//protein ubiquitination
Os03g0182700	149	45	146	680	989	787	4.24	1.17	4.02	17.81	27.15	26.09	3.14333	23.6833	2.9135	1.23634e-10	9.60933e-09	eIF-3k	Eukaryotic translation initiation factor 3 subunit 12 (eIF-3 p25) (eIF3k)	-	-	-	-	GO:0005737//cytoplasm;GO:0005829//cytosol;GO:0005852//eukaryotic translation initiation factor 3 complex;GO:0016282//eukaryotic 43S preinitiation complex;GO:0033290//eukaryotic 48S preinitiation complex	GO:0003723//RNA binding;GO:0003743//translation initiation factor activity;GO:0043022//ribosome binding	GO:0001732//formation of cytoplasmic translation initiation complex;GO:0002183//cytoplasmic translational initiation;GO:0006412//translation;GO:0006413//translational initiation;GO:0006446//regulation of translational initiation
Os08g0448000	71	12	64	505	572	441	1.07	0.17	0.93	6.98	8.29	7.72	0.723333	7.66333	3.40524	1.35938e-10	1.05119e-08	4CL5	4-coumarate:coenzyme A ligase, Lignin biosynthesis, Defense against woundin	Metabolism;Metabolism;Metabolism;Metabolism	Global and overview maps;Global and overview maps;Biosynthesis of other secondary metabolites;Metabolism of cofactors and vitamins	ko01100//Metabolic pathways;ko01110//Biosynthesis of secondary metabolites;ko00940//Phenylpropanoid biosynthesis;ko00130//Ubiquinone and other terpenoid-quinone biosynthesis	K01904;K01904;K01904;K01904	-	GO:0000166//nucleotide binding;GO:0003824//catalytic activity;GO:0005524//ATP binding;GO:0016207//4-coumarate-CoA ligase activity;GO:0016874//ligase activity	GO:0009698//phenylpropanoid metabolic process
Os07g0622100	45	12	27	259	312	262	1.24	0.3	0.72	6.58	8.31	8.43	0.753333	7.77333	3.36717	1.38559e-10	1.06451e-08	-	Similar to Ribosomal protein s6 RPS6-2	Genetic Information Processing	Translation	ko03010//Ribosome	K02991	GO:0005840//ribosome	GO:0003735//structural constituent of ribosome	GO:0006412//translation
Os07g0224900	43	5	37	425	499	297	0.64	0.09	0.53	6.1	7.18	5.43	0.42	6.23667	3.89231	1.41963e-10	1.08648e-08	OsWD40-138	WD40 repeat-like domain containing protein	Genetic Information Processing	Translation	ko03008//Ribosome biogenesis in eukaryotes	K14549	GO:0005730//nucleolus	GO:0005515//protein binding	GO:0006364//rRNA processing;GO:0009553//embryo sac development;GO:0009561//megagametogenesis;GO:0045943//positive regulation of transcription from RNA polymerase I promoter
Os03g0576700	124	57	240	1450	1491	1253	4.06	1.71	7.61	43.77	47.17	47.87	4.46	46.27	3.37496	1.42685e-10	1.08784e-08	RPL13b	Similar to 60S ribosomal protein L13 (BBC1 protein homolog)	Genetic Information Processing	Translation	ko03010//Ribosome	K02873	GO:0005840//ribosome;GO:0022625//cytosolic large ribosomal subunit	GO:0003723//RNA binding;GO:0003735//structural constituent of ribosome	GO:0006412//translation
Os02g0327500	1	1	14	212	329	243	0.02	0.02	0.23	3.33	5.42	4.83	0.09	4.52667	5.65238	1.5704e-10	1.19273e-08	-	Protein of unknown function DUF266, plant family protein	-	-	-	-	GO:0016020//membrane;GO:0016021//integral component of membrane	GO:0008375//acetylglucosaminyltransferase activity	-
Os09g0297400	63	20	65	436	869	410	1.12	0.33	1.12	7.14	14.91	8.49	0.856667	10.18	3.57086	1.62608e-10	1.23034e-08	OsPPT1	Similar to Phosphate/phosphoenolpyruvate translocator	-	-	-	-	GO:0005739//mitochondrion;GO:0005794//Golgi apparatus;GO:0009507//chloroplast;GO:0009536//plastid;GO:0016020//membrane;GO:0016021//integral component of membrane;GO:0031969//chloroplast membrane	GO:0009670//triose-phosphate:phosphate antiporter activity;GO:0015120//phosphoglycerate transmembrane transporter activity;GO:0015121//phosphoenolpyruvate:phosphate antiporter activity;GO:0015297//antiporter activity;GO:0022857//transmembrane transporter activity;GO:0071917//triose-phosphate transmembrane transporter activity	GO:0008643//carbohydrate transport;GO:0015714//phosphoenolpyruvate transport;GO:0035436//triose phosphate transmembrane transport;GO:0055085//transmembrane transport;GO:0089722//phosphoenolpyruvate transmembrane transport
Os03g0305500	203	85	227	1144	1058	967	3.29	1.26	3.56	17.07	16.54	18.26	2.70333	17.29	2.67713	1.80857e-10	1.35978e-08	ASL1	Argininosuccinate lyase, Root elongatio	Metabolism;Metabolism;Metabolism;Metabolism;Metabolism	Global and overview maps;Global and overview maps;Global and overview maps;Amino acid metabolism;Amino acid metabolism	ko01100//Metabolic pathways;ko01110//Biosynthesis of secondary metabolites;ko01230//Biosynthesis of amino acids;ko00250//Alanine, aspartate and glutamate metabolism;ko00220//Arginine biosynthesis	K01755;K01755;K01755;K01755;K01755	GO:0005737//cytoplasm	GO:0003824//catalytic activity;GO:0004056//argininosuccinate lyase activity;GO:0016829//lyase activity	GO:0042450//arginine biosynthetic process via ornithine
Os03g0318500	32	7	33	337	331	226	0.45	0.09	0.45	4.39	4.52	3.73	0.33	4.21333	3.67442	1.81758e-10	1.35978e-08	OsG6PDH5	Similar to Glucose-6-phosphate 1-dehydrogenase, chloroplast precursor (EC 1.1.1.49) (G6PD)	Metabolism;Metabolism;Metabolism;Metabolism;Metabolism	Global and overview maps;Global and overview maps;Global and overview maps;Metabolism of other amino acids;Carbohydrate metabolism	ko01100//Metabolic pathways;ko01110//Biosynthesis of secondary metabolites;ko01200//Carbon metabolism;ko00480//Glutathione metabolism;ko00030//Pentose phosphate pathway	K00036;K00036;K00036;K00036;K00036	-	GO:0004345//glucose-6-phosphate dehydrogenase activity;GO:0016491//oxidoreductase activity;GO:0016614//oxidoreductase activity, acting on CH-OH group of donors;GO:0050661//NADP binding	GO:0005975//carbohydrate metabolic process;GO:0006006//glucose metabolic process;GO:0006098//pentose-phosphate shunt;GO:0055114//oxidation-reduction process
Os05g0473000	0	0	0	136	203	73	0	0	0	2.54	3.97	1.72	0.001	2.74333	11.4217	2.05261e-10	1.52988e-08	OsPYL/RCAR6	Streptomyces cyclase/dehydrase family protein	Environmental Information Processing;Environmental Information Processing	Signal transduction;Signal transduction	ko04075//Plant hormone signal transduction;ko04016//MAPK signaling pathway - plant	K14496;K14496	GO:0005634//nucleus;GO:0005737//cytoplasm	GO:0004864//protein phosphatase inhibitor activity;GO:0010427//abscisic acid binding;GO:0038023//signaling receptor activity	GO:0009738//abscisic acid-activated signaling pathway;GO:0032515//negative regulation of phosphoprotein phosphatase activity;GO:0080163//regulation of protein serine/threonine phosphatase activity
Os12g0555000	20	4	14	370	141	295	0.78	0.14	0.53	13.31	5.32	13.43	0.483333	10.6867	4.46665	2.15076e-10	1.59116e-08	RSOsPR10	Similar to Probenazole-inducible protein PBZ1	-	-	-	-	GO:0005634//nucleus;GO:0005737//cytoplasm	GO:0004864//protein phosphatase inhibitor activity;GO:0010427//abscisic acid binding;GO:0038023//signaling receptor activity	GO:0009738//abscisic acid-activated signaling pathway;GO:0032515//negative regulation of phosphoprotein phosphatase activity;GO:0080163//regulation of protein serine/threonine phosphatase activity
Os02g0576700	27	25	41	399	394	320	0.61	0.52	0.9	8.32	8.61	8.44	0.676667	8.45667	3.64357	2.21915e-10	1.62969e-08	OsNAPL6	Nucleosome assembly protein (NAP) family protein, H3/H4 histone chaperone, Abiotic stress response and adaptatio	-	-	-	-	GO:0005634//nucleus;GO:0005737//cytoplasm	-	GO:0006334//nucleosome assembly
Os07g0150200	50	16	90	556	765	551	2.02	0.59	3.53	20.73	29.91	26.01	2.04667	25.55	3.64198	2.30298e-10	1.68505e-08	-	Similar to 40S ribosomal protein S12-1	Genetic Information Processing	Translation	ko03010//Ribosome	K02951	GO:0005840//ribosome;GO:0022627//cytosolic small ribosomal subunit	GO:0003735//structural constituent of ribosome	GO:0006412//translation
Os12g0609800	30	6	18	221	295	193	0.3	0.08	0.17	2.04	2.85	2.25	0.183333	2.38	3.69842	2.48698e-10	1.7999e-08	OsWD40-199	WD40/YVTN repeat-like domain containing protein	Genetic Information Processing	Translation	ko03008//Ribosome biogenesis in eukaryotes	K14552	-	GO:0005515//protein binding	-
Os05g0537100	35	30	19	440	1056	396	0.9	0.7	0.48	10.46	26.31	11.91	0.693333	16.2267	4.54867	3.19727e-10	2.28909e-08	OsWRKY7	WRKY transcription factor 10	-	-	-	-	GO:0005634//nucleus	GO:0003677//DNA binding;GO:0003700//transcription factor activity, sequence-specific DNA binding;GO:0043565//sequence-specific DNA binding	GO:0006355//regulation of transcription, DNA-templated
Os09g0438700	38	19	80	516	656	468	1.12	0.51	2.28	14	18.65	16.07	1.30333	16.24	3.63927	3.21213e-10	2.28955e-08	-	Similar to 20 kDa chaperonin, chloroplast precursor (Protein Cpn21) (Chloroplast protein Cpn10) (Chloroplast chaperonin 10) (Ch-CPN10) (Chaperonin 20)	-	-	-	-	GO:0005759//mitochondrial matrix;GO:0009507//chloroplast;GO:0009536//plastid	GO:0005524//ATP binding;GO:0046872//metal ion binding;GO:0046914//transition metal ion binding;GO:0051082//unfolded protein binding;GO:0051087//chaperone binding	GO:0006457//protein folding;GO:0051085//chaperone mediated protein folding requiring cofactor;GO:1901671//positive regulation of superoxide dismutase activity
Os06g0470000	166	63	141	666	918	686	2.79	0.98	2.29	10.33	14.92	13.48	2.02	12.91	2.67606	3.22084e-10	2.28955e-08	-	Glycosyltransferase AER61, uncharacterized domain containing protein	-	-	-	-	GO:0016020//membrane;GO:0016021//integral component of membrane	GO:0016757//transferase activity, transferring glycosyl groups	-
Os07g0469100	2884	1060	1384	612	541	1039	115.68	39.21	53.99	22.6	21.03	48.7	69.6267	30.7767	-1.1778	3.35699e-10	2.36947e-08	-	Similar to Thylakoid membrane phosphoprotein 14 kDa, chloroplast precursor	-	-	-	-	GO:0009535//chloroplast thylakoid membrane;GO:0009579//thylakoid;GO:0016020//membrane;GO:0016021//integral component of membrane	-	-
Os02g0745100	307	115	115	43	24	58	6.47	2.23	2.35	0.84	0.49	1.43	3.68333	0.92	-2.00131	3.46259e-10	2.4354e-08	LSI1	Aquaporin NIP III subfamily protein, Aquaporin, Silicon influx transporter, Arsenic species (As) uptake, Arsenite efflux, Selenite (Se) uptake, Water transpor	-	-	-	-	GO:0005886//plasma membrane;GO:0016020//membrane;GO:0016021//integral component of membrane;GO:0048226//Casparian strip	GO:0005215//transporter activity;GO:0015115//silicate transmembrane transporter activity;GO:0015267//channel activity	GO:0015708//silicate transport;GO:0055085//transmembrane transport
Os01g0649100	357	152	328	1543	1758	1274	8.25	3.24	7.37	32.96	39.27	34.43	6.28667	35.5533	2.49962	3.51794e-10	2.46564e-08	OsmMDH	Malate dehydrogenase	Metabolism;Metabolism;Metabolism;Metabolism;Metabolism;Metabolism;Metabolism;Metabolism	Global and overview maps;Global and overview maps;Global and overview maps;Amino acid metabolism;Carbohydrate metabolism;Energy metabolism;Carbohydrate metabolism;Carbohydrate metabolism	ko01100//Metabolic pathways;ko01110//Biosynthesis of secondary metabolites;ko01200//Carbon metabolism;ko00270//Cysteine and methionine metabolism;ko00620//Pyruvate metabolism;ko00710//Carbon fixation in photosynthetic organisms;ko00630//Glyoxylate and dicarboxylate metabolism;ko00020//Citrate cycle (TCA cycle)	K00026;K00026;K00026;K00026;K00026;K00026;K00026;K00026	GO:0005737//cytoplasm;GO:0005739//mitochondrion	GO:0003824//catalytic activity;GO:0016491//oxidoreductase activity;GO:0016615//malate dehydrogenase activity;GO:0016616//oxidoreductase activity, acting on the CH-OH group of donors, NAD or NADP as acceptor;GO:0030060//L-malate dehydrogenase activity	GO:0005975//carbohydrate metabolic process;GO:0006099//tricarboxylic acid cycle;GO:0006108//malate metabolic process;GO:0019752//carboxylic acid metabolic process;GO:0055114//oxidation-reduction process
Os05g0365600	1628	829	1004	479	263	608	26.3	12.29	15.69	7.13	4.1	11.44	18.0933	7.55667	-1.25964	3.69224e-10	2.56977e-08	Os5bglu19	Similar to Hydroxyisourate hydrolase	Metabolism;Metabolism;Metabolism;Metabolism;Metabolism	Global and overview maps;Global and overview maps;Biosynthesis of other secondary metabolites;Carbohydrate metabolism;Metabolism of other amino acids	ko01100//Metabolic pathways;ko01110//Biosynthesis of secondary metabolites;ko00940//Phenylpropanoid biosynthesis;ko00500//Starch and sucrose metabolism;ko00460//Cyanoamino acid metabolism	K01188;K01188;K01188;K01188;K01188	-	GO:0004553//hydrolase activity, hydrolyzing O-glycosyl compounds;GO:0008422//beta-glucosidase activity;GO:0016787//hydrolase activity;GO:0016798//hydrolase activity, acting on glycosyl bonds	GO:0005975//carbohydrate metabolic process;GO:0008152//metabolic process
Os10g0512400	25	24	38	449	315	364	0.36	0.31	0.52	5.88	4.32	6.03	0.396667	5.41	3.76963	3.73436e-10	2.59007e-08	CYP84A5	Coniferaldehyde 5-hydroxylase, Lignin biosynthesi	Metabolism;Metabolism;Metabolism	Global and overview maps;Global and overview maps;Biosynthesis of other secondary metabolites	ko01100//Metabolic pathways;ko01110//Biosynthesis of secondary metabolites;ko00940//Phenylpropanoid biosynthesis	K09755;K09755;K09755	GO:0016020//membrane	GO:0004497//monooxygenase activity;GO:0005506//iron ion binding;GO:0016491//oxidoreductase activity;GO:0016705//oxidoreductase activity, acting on paired donors, with incorporation or reduction of molecular oxygen;GO:0016709//oxidoreductase activity, acting on paired donors, with incorporation or reduction of molecular oxygen, NAD(P)H as one donor, and incorporation of one atom of oxygen;GO:00200…	GO:0009809//lignin biosynthetic process;GO:0055114//oxidation-reduction process
Os06g0701100	676	252	633	2396	3155	2477	12.35	4.29	11.36	40.86	56.43	53.49	9.33333	50.26	2.42895	3.91596e-10	2.70662e-08	eIF-4a	Eukaryotic initiation factor 4A (eIF4A) (eIF-4A)	Genetic Information Processing	Translation	ko03013//RNA transport	K03257	GO:0010494//cytoplasmic stress granule	GO:0000166//nucleotide binding;GO:0003676//nucleic acid binding;GO:0003723//RNA binding;GO:0003724//RNA helicase activity;GO:0003743//translation initiation factor activity;GO:0004386//helicase activity;GO:0005524//ATP binding;GO:0016787//hydrolase activity	GO:0002183//cytoplasmic translational initiation;GO:0006412//translation;GO:0006413//translational initiation
Os03g0684700	1332	1253	653	214	92	343	34.43	29.72	16.33	5.09	2.3	10.33	26.8267	5.90667	-2.18325	4.13648e-10	2.84692e-08	-	HPP family protein	-	-	-	-	GO:0016020//membrane;GO:0016021//integral component of membrane	-	-
MSTRG.13264	301	205	242	111	97	134	3.62	2.25	2.95	1.26	1.18	1.87	2.94	1.43667	-1.03309	4.14746e-10	2.84692e-08	SAC2	phosphoinositide phosphatase SAC3 isoform X1 [Oryza sativa Japonica Group]	Metabolism;Metabolism	Global and overview maps;Carbohydrate metabolism	ko01100//Metabolic pathways;ko00562//Inositol phosphate metabolism	K22913;K22913	-	GO:0016788//hydrolase activity, acting on ester bonds	GO:0006661//phosphatidylinositol biosynthetic process
Os04g0349500	53	18	80	474	553	439	1.54	0.48	2.25	12.7	15.52	14.88	1.42333	14.3667	3.33538	4.165e-10	2.84918e-08	-	Similar to 40S ribosomal protein S8	Genetic Information Processing	Translation	ko03010//Ribosome	K02995	GO:0005840//ribosome;GO:0022627//cytosolic small ribosomal subunit	GO:0003735//structural constituent of ribosome	GO:0000462//maturation of SSU-rRNA from tricistronic rRNA transcript (SSU-rRNA, 5.8S rRNA, LSU-rRNA);GO:0006412//translation
Os07g0539900	0	0	0	254	79	96	0	0	0	3.36	1.1	1.61	0.001	2.02333	10.9825	4.24729e-10	2.89555e-08	-	Similar to Beta-1,3-glucanase-like protein	-	-	-	-	GO:0016020//membrane;GO:0016021//integral component of membrane;GO:0046658//anchored component of plasma membrane	GO:0004553//hydrolase activity, hydrolyzing O-glycosyl compounds;GO:0016787//hydrolase activity	GO:0005975//carbohydrate metabolic process
Os04g0430100	494	112	618	3439	3916	3304	16.32	3.4	19.75	104.61	124.86	127.2	13.1567	118.89	3.17576	4.73142e-10	3.20374e-08	-	Similar to 40S ribosomal protein S10-1	Genetic Information Processing	Translation	ko03010//Ribosome	K02947	GO:0005737//cytoplasm;GO:0005840//ribosome;GO:0022627//cytosolic small ribosomal subunit	GO:0003723//RNA binding;GO:0003735//structural constituent of ribosome	GO:0000028//ribosomal small subunit assembly
Os01g0975900	2201	421	888	185	38	257	56.64	9.75	22.1	4.3	0.95	7.73	29.4967	4.32667	-2.76922	4.83662e-10	3.2639e-08	OsTIP1	Similar to Tonoplast membrane integral protein ZmTIP1-2	-	-	-	-	GO:0005773//vacuole;GO:0005774//vacuolar membrane;GO:0016020//membrane;GO:0016021//integral component of membrane	GO:0015204//urea transmembrane transporter activity;GO:0015250//water channel activity;GO:0015267//channel activity	GO:0055085//transmembrane transport;GO:0071918//urea transmembrane transport
Os08g0104700	156	51	180	952	1032	771	0.91	0.33	0.94	4.87	5.51	5.25	0.726667	5.21	2.84192	4.95143e-10	3.30946e-08	-	Chaperonin Cpn60/TCP-1 family protein	Metabolism;Cellular Processes;Environmental Information Processing;Metabolism	Global and overview maps;Transport and catabolism;Signal transduction;Carbohydrate metabolism	ko01100//Metabolic pathways;ko04145//Phagosome;ko04070//Phosphatidylinositol signaling system;ko00562//Inositol phosphate metabolism	K00921;K00921;K00921;K00921	GO:0010008//endosome membrane	GO:0000166//nucleotide binding;GO:0000285//1-phosphatidylinositol-3-phosphate 5-kinase activity;GO:0005524//ATP binding;GO:0016301//kinase activity;GO:0016307//phosphatidylinositol phosphate kinase activity;GO:0016740//transferase activity	GO:0016310//phosphorylation;GO:0046488//phosphatidylinositol metabolic process;GO:0046854//phosphatidylinositol phosphorylation
Os03g0655400	134	69	125	28	20	46	6.43	3.04	5.8	1.24	0.93	2.57	5.09	1.58	-1.68774	5.06102e-10	3.3698e-08	OsLEA24	Similar to LIP5	-	-	-	-	-	GO:0046872//metal ion binding	-
Os01g0834500	16	7	18	180	187	164	0.63	0.27	0.7	6.58	7.17	7.59	0.533333	7.11333	3.73742	5.15132e-10	3.41853e-08	-	Similar to 40S ribosomal protein S23 (S12)	Genetic Information Processing	Translation	ko03010//Ribosome	K02973	GO:0005840//ribosome;GO:0015935//small ribosomal subunit;GO:0022627//cytosolic small ribosomal subunit	GO:0003735//structural constituent of ribosome	GO:0006412//translation
Os07g0636000	2	0	4	121	160	93	0.03	0	0.05	1.58	2.18	1.53	0.0266667	1.76333	6.04712	5.25583e-10	3.46897e-08	-	Similar to H/ACA ribonucleoprotein complex subunit 4 (EC 5.4.99.-) (Nucleolar protein NAP57 homolog) (Nopp-140 associated protein of 57 kDa homolog) (AtNAP57)	Genetic Information Processing	Translation	ko03008//Ribosome biogenesis in eukaryotes	K11131	GO:0031429//box H/ACA snoRNP complex	GO:0003723//RNA binding;GO:0009982//pseudouridine synthase activity	GO:0000495//box H/ACA snoRNA 3'-end processing;GO:0001522//pseudouridine synthesis;GO:0006396//RNA processing;GO:0009451//RNA modification;GO:0031118//rRNA pseudouridine synthesis;GO:0031120//snRNA pseudouridine synthesis;GO:1990481//mRNA pseudouridine synthesis
Os07g0617000	26	10	56	361	535	387	0.54	0.19	1.14	6.89	10.79	9.39	0.623333	9.02333	3.85558	5.26207e-10	3.46897e-08	OsERF#065	Similar to Ethylene response factor 2	-	-	-	-	GO:0005634//nucleus	GO:0003677//DNA binding;GO:0003700//transcription factor activity, sequence-specific DNA binding	GO:0006355//regulation of transcription, DNA-templated
Os01g0118400	71	29	45	444	912	378	1	0.37	0.61	5.76	12.39	6.2	0.66	8.11667	3.62035	5.66002e-10	3.71904e-08	-	Similar to HGA6	-	-	-	-	GO:0016020//membrane;GO:0016021//integral component of membrane	GO:0016757//transferase activity, transferring glycosyl groups	-
Os06g0215600	1	0	1	132	204	122	0.02	0	0.02	2.52	4.08	2.94	0.0133333	3.18	7.89785	5.80804e-10	3.79694e-08	OsOPR5	Similar to Oxo-phytodienoic acid reductase	Metabolism;Metabolism;Metabolism	Global and overview maps;Global and overview maps;Lipid metabolism	ko01100//Metabolic pathways;ko01110//Biosynthesis of secondary metabolites;ko00592//alpha-Linolenic acid metabolism	K05894;K05894;K05894	-	GO:0003824//catalytic activity;GO:0010181//FMN binding;GO:0016491//oxidoreductase activity;GO:0016629//12-oxophytodienoate reductase activity	GO:0006629//lipid metabolic process;GO:0006631//fatty acid metabolic process;GO:0006633//fatty acid biosynthetic process;GO:0009695//jasmonic acid biosynthetic process;GO:0031408//oxylipin biosynthetic process;GO:0055114//oxidation-reduction process
Os03g0756000	265	154	300	1513	2334	1397	8.3	4.44	9.11	43.74	70.73	51.11	7.28333	55.1933	2.92182	5.97631e-10	3.8885e-08	-	Similar to 60S ribosomal protein L13a-4	Genetic Information Processing	Translation	ko03010//Ribosome	K02872	GO:0005840//ribosome;GO:0015934//large ribosomal subunit;GO:0022625//cytosolic large ribosomal subunit	GO:0003729//mRNA binding;GO:0003735//structural constituent of ribosome	GO:0006412//translation;GO:0017148//negative regulation of translation
Os08g0129200	29	18	26	277	501	229	0.88	0.5	0.76	7.71	14.62	8.07	0.713333	10.1333	3.82839	6.02872e-10	3.90986e-08	OsCSP2	Similar to Cold shock protein-1	-	-	-	-	-	GO:0003676//nucleic acid binding;GO:0003690//double-stranded DNA binding;GO:0003697//single-stranded DNA binding;GO:0003729//mRNA binding;GO:0008270//zinc ion binding	GO:0006355//regulation of transcription, DNA-templated;GO:0009414//response to water deprivation;GO:0009631//cold acclimation;GO:0009651//response to salt stress;GO:0010501//RNA secondary structure unwinding;GO:0032508//DNA duplex unwinding
Os03g0177500	2736	725	2784	13282	15334	11764	47.18	11.47	46.44	210.94	255.23	236.43	35.03	234.2	2.74108	6.3598e-10	4.11123e-08	rfa4*	EF-1 alpha	Genetic Information Processing	Translation	ko03013//RNA transport	K03231	GO:0005737//cytoplasm	GO:0000166//nucleotide binding;GO:0003746//translation elongation factor activity;GO:0003924//GTPase activity;GO:0005525//GTP binding	GO:0006412//translation;GO:0006414//translational elongation
Os04g0652400	2821	1744	1866	895	629	1275	49.33	22.97	30.62	13.49	11.7	25.31	34.3067	16.8333	-1.02717	6.60748e-10	4.25756e-08	SULTR3	Ortholog of the sulfate transporter family group 3 , Grain metabolis	-	-	-	-	GO:0005887//integral component of plasma membrane;GO:0016020//membrane;GO:0016021//integral component of membrane	GO:0008271//secondary active sulfate transmembrane transporter activity;GO:0015116//sulfate transmembrane transporter activity;GO:0015301//anion:anion antiporter activity	GO:0008272//sulfate transport;GO:0055085//transmembrane transport;GO:0098656//anion transmembrane transport;GO:1902358//sulfate transmembrane transport
Os03g0350300	33	1	21	268	448	344	0.46	0.01	0.28	3.42	5.99	5.56	0.25	4.99	4.31904	6.75614e-10	4.33936e-08	BIP102	Similar to SAR DNA-binding protein-like protein	Genetic Information Processing	Translation	ko03008//Ribosome biogenesis in eukaryotes	K14565	GO:0031428//box C/D snoRNP complex;GO:0032040//small-subunit processome	GO:0030515//snoRNA binding	-
MSTRG.20484	33	20	45	0	0	0	0.72	0.41	0.95	0	0	0	0.693333	0.001	-9.43741	8.04613e-10	5.08612e-08	--	OSJNBa0039K24.15 [Oryza sativa Japonica Group]	-	-	-	-	-	-	-
Os03g0345200	167	30	165	947	1296	1036	9.52	1.57	9.1	49.71	71.3	68.82	6.73	63.2767	3.233	8.26732e-10	5.20946e-08	RPS21	40S ribosomal protein S21	Genetic Information Processing	Translation	ko03010//Ribosome	K02971	GO:0005840//ribosome;GO:0022627//cytosolic small ribosomal subunit	GO:0003735//structural constituent of ribosome	GO:0000447//endonucleolytic cleavage in ITS1 to separate SSU-rRNA from 5.8S rRNA and LSU-rRNA from tricistronic rRNA transcript (SSU-rRNA, 5.8S rRNA, LSU-rRNA);GO:0000461//endonucleolytic cleavage to generate mature 3'-end of SSU-rRNA from (SSU-rRNA, 5.8S rRNA, LSU-rRNA);GO:0006412//translation
Os11g0602500	68	19	91	477	653	519	2.45	0.63	3.17	15.85	22.75	21.82	2.08333	20.14	3.2731	8.42847e-10	5.2943e-08	-	Similar to 40S ribosomal protein S9	Genetic Information Processing	Translation	ko03010//Ribosome	K02997	GO:0005840//ribosome;GO:0015935//small ribosomal subunit;GO:0022627//cytosolic small ribosomal subunit	GO:0003723//RNA binding;GO:0003735//structural constituent of ribosome;GO:0019843//rRNA binding	GO:0006412//translation;GO:0045903//positive regulation of translational fidelity
Os10g0564300	26	13	19	181	250	212	1.07	0.49	0.76	6.87	9.95	10.19	0.773333	9.00333	3.5413	8.68558e-10	5.4217e-08	-	Similar to 60S ribosomal protein L27	Genetic Information Processing	Translation	ko03010//Ribosome	K02901	GO:0005840//ribosome;GO:0022625//cytosolic large ribosomal subunit	GO:0003735//structural constituent of ribosome	GO:0006412//translation
Os01g0686800	127	26	133	714	1160	803	2.78	0.55	2.96	14.77	24.56	20.87	2.09667	20.0667	3.25863	8.98454e-10	5.59085e-08	RACK1	Protein containing the WD-40 repeat, Innate immunut	-	-	-	-	GO:0005634//nucleus;GO:0005737//cytoplasm;GO:0005829//cytosol;GO:0005840//ribosome;GO:0005886//plasma membrane;GO:0016020//membrane;GO:0022627//cytosolic small ribosomal subunit	GO:0005080//protein kinase C binding;GO:0005515//protein binding;GO:0019899//enzyme binding;GO:0043022//ribosome binding	GO:0001934//positive regulation of protein phosphorylation;GO:0006952//defense response;GO:0007165//signal transduction;GO:0050832//defense response to fungus;GO:0060267//positive regulation of respiratory burst;GO:0072344//rescue of stalled ribosome
Os02g0240300	1267	309	842	5840	11402	4654	30.41	6.81	19.55	129.11	264.2	130.21	18.9233	174.507	3.20504	9.46329e-10	5.87047e-08	prx29	Similar to Class III peroxidase GvPx2b (Fragment)	Metabolism;Metabolism;Metabolism	Global and overview maps;Global and overview maps;Biosynthesis of other secondary metabolites	ko01100//Metabolic pathways;ko01110//Biosynthesis of secondary metabolites;ko00940//Phenylpropanoid biosynthesis	K00430;K00430;K00430	GO:0005576//extracellular region	GO:0004601//peroxidase activity;GO:0016491//oxidoreductase activity;GO:0020037//heme binding;GO:0046872//metal ion binding	GO:0006979//response to oxidative stress;GO:0042744//hydrogen peroxide catabolic process;GO:0055114//oxidation-reduction process;GO:0098869//cellular oxidant detoxification
Os07g0570100	0	0	3	147	129	120	0	0	0.02	1.26	1.16	1.3	0.00666667	1.24	7.53916	9.56801e-10	5.91706e-08	-	Similar to predicted protein	-	-	-	-	GO:0005739//mitochondrion;GO:0005743//mitochondrial inner membrane;GO:0005750//mitochondrial respiratory chain complex III;GO:0017087//mitochondrial processing peptidase complex	GO:0003824//catalytic activity;GO:0004175//endopeptidase activity;GO:0004222//metalloendopeptidase activity;GO:0046872//metal ion binding	GO:0006122//mitochondrial electron transport, ubiquinol to cytochrome c;GO:0006508//proteolysis;GO:0006627//protein processing involved in protein targeting to mitochondrion;GO:0009060//aerobic respiration
Os07g0290800	10	0	4	145	158	125	0.28	0	0.11	3.72	4.25	4.06	0.13	4.01	4.94702	9.73526e-10	6.00191e-08	-	Tic22-like family protein	-	-	-	-	GO:0009507//chloroplast	-	GO:0006457//protein folding;GO:0015031//protein transport
Os07g0565100	26	3	22	210	311	213	1.02	0.11	0.82	7.61	11.82	9.77	0.65	9.73333	3.90442	1.0165e-09	6.24754e-08	-	Similar to 40S ribosomal protein S11	Genetic Information Processing	Translation	ko03010//Ribosome	K02949	GO:0005840//ribosome;GO:0022627//cytosolic small ribosomal subunit	GO:0003735//structural constituent of ribosome	GO:0006412//translation
Os04g0104900	15	4	5	491	60	853	0.36	0.09	0.12	10.91	1.4	23.98	0.19	12.0967	5.99247	1.03518e-09	6.34286e-08	OsCOMTL2	Similar to 0-methyltransferase (EC 2.1.1.6) (Fragment)	-	-	-	-	GO:0005829//cytosol	GO:0008168//methyltransferase activity;GO:0008171//O-methyltransferase activity;GO:0008757//S-adenosylmethionine-dependent methyltransferase activity;GO:0016740//transferase activity;GO:0046983//protein dimerization activity	GO:0019438//aromatic compound biosynthetic process;GO:0032259//methylation
MSTRG.10139	164	101	93	38	31	45	5.78	3.27	3.17	1.23	1.05	1.85	4.07333	1.37667	-1.56503	1.04556e-09	6.3869e-08	RUP1	WD repeat-containing protein RUP2 [Oryza sativa Japonica Group]	Genetic Information Processing;Organismal Systems	Folding, sorting and degradation;Environmental adaptation	ko04120//Ubiquitin mediated proteolysis;ko04712//Circadian rhythm - plant	K10143;K10143	-	GO:0003824//catalytic activity	GO:0009416//response to light stimulus;GO:0009987//cellular process;GO:0044699//single-organism process
Os03g0663500	4	0	15	332	173	225	0.14	0	0.49	10.41	5.69	8.93	0.21	8.34333	5.31216	1.1219e-09	6.83232e-08	TLP	Similar to Osmotin precursor	-	-	-	-	GO:0005576//extracellular region	-	GO:0006952//defense response
Os03g0824100	56	16	101	599	812	592	0.52	0.14	0.92	5.17	7.34	6.47	0.526667	6.32667	3.58648	1.15001e-09	6.97918e-08	OspTAC2	Pentatricopeptide repeat protein, Regulation of chloroplast developmen	-	-	-	-	GO:0009507//chloroplast;GO:0009508//plastid chromosome;GO:0042644//chloroplast nucleoid	GO:0005515//protein binding	GO:0042793//transcription from plastid promoter;GO:0045893//positive regulation of transcription, DNA-templated
Os07g0543100	157	80	73	16	31	32	2.26	1.06	1.02	0.21	0.43	0.54	1.44667	0.393333	-1.87891	1.16967e-09	7.05868e-08	-	Similar to Beta-amylase (EC 3.2.1.2)	Metabolism;Metabolism;Metabolism	Global and overview maps;Global and overview maps;Carbohydrate metabolism	ko01100//Metabolic pathways;ko01110//Biosynthesis of secondary metabolites;ko00500//Starch and sucrose metabolism	K01177;K01177;K01177	-	GO:0016161//beta-amylase activity;GO:0016787//hydrolase activity;GO:0016798//hydrolase activity, acting on glycosyl bonds	GO:0000272//polysaccharide catabolic process;GO:0005975//carbohydrate metabolic process;GO:0008152//metabolic process
Os09g0437500	68	21	236	2412	3502	1370	1.72	0.49	5.77	56.1	85.36	40.31	2.66	60.59	4.50958	1.17926e-09	7.07898e-08	-	Dormancyauxin associated family protein	-	-	-	-	-	-	-
Os03g0150600	1123	261	942	5104	5999	4192	18.22	3.89	14.8	76.31	94.04	79.33	12.3033	83.2267	2.758	1.18614e-09	7.09377e-08	PT1	Pi transporter, Pi homeostasi	-	-	-	-	GO:0016020//membrane;GO:0016021//integral component of membrane	GO:0005315//inorganic phosphate transmembrane transporter activity;GO:0015293//symporter activity;GO:0022857//transmembrane transporter activity	GO:0006817//phosphate ion transport;GO:0055085//transmembrane transport
Os09g0491820	999	529	817	245	89	342	23.07	11.11	18.33	5.16	1.97	9.25	17.5033	5.46	-1.68066	1.19292e-09	7.11298e-08	OsCCR16	NAD(P)-binding domain containing protein	-	-	-	-	-	GO:0003824//catalytic activity;GO:0016491//oxidoreductase activity;GO:0016616//oxidoreductase activity, acting on the CH-OH group of donors, NAD or NADP as acceptor;GO:0050662//coenzyme binding	GO:0055114//oxidation-reduction process
Os01g0815800	34	9	35	239	417	246	1.71	0.28	1.19	7.75	14.19	10.11	1.06	10.6833	3.33323	1.22267e-09	7.24715e-08	BIP123	Similar to 60S ribosomal protein L24-A (L30A) (RP29) (YL21)	Genetic Information Processing	Translation	ko03010//Ribosome	K02896	GO:0022625//cytosolic large ribosomal subunit	GO:0003723//RNA binding;GO:0003735//structural constituent of ribosome	GO:0000027//ribosomal large subunit assembly;GO:0006412//translation;GO:1902626//assembly of large subunit precursor of preribosome
Os11g0705200	25	5	38	265	382	283	0.34	0.06	0.49	3.27	4.94	4.42	0.296667	4.21	3.82691	1.24074e-09	7.33248e-08	-	Similar to Scarecrow-like 9 (Fragment)	-	-	-	-	GO:0005634//nucleus	GO:0003700//transcription factor activity, sequence-specific DNA binding;GO:0043565//sequence-specific DNA binding	GO:0006355//regulation of transcription, DNA-templated
Os02g0478700	374	184	622	3098	3614	2466	16.7	7.54	26.87	127.4	155.77	128.34	17.0367	137.17	3.00925	1.2461e-09	7.34246e-08	-	Ribosomal protein S27	Genetic Information Processing	Translation	ko03010//Ribosome	K02978	GO:0005840//ribosome;GO:0022627//cytosolic small ribosomal subunit	GO:0003723//RNA binding;GO:0003735//structural constituent of ribosome;GO:0046872//metal ion binding	GO:0000028//ribosomal small subunit assembly;GO:0006412//translation
Os04g0103200	231	149	269	1289	1533	1288	4.13	2.46	4.67	21.3	26.51	26.93	3.75333	24.9133	2.73067	1.25338e-09	7.36359e-08	eIF-3m	Proteasome component region PCI domain containing protein	-	-	-	-	GO:0005737//cytoplasm;GO:0005852//eukaryotic translation initiation factor 3 complex;GO:0016282//eukaryotic 43S preinitiation complex;GO:0033290//eukaryotic 48S preinitiation complex;GO:0071541//eukaryotic translation initiation factor 3 complex, eIF3m	GO:0003743//translation initiation factor activity	GO:0001732//formation of cytoplasmic translation initiation complex;GO:0002183//cytoplasmic translational initiation;GO:0006412//translation;GO:0006413//translational initiation
Os07g0619500	32	11	30	229	232	219	0.65	0.2	0.59	4.27	4.53	5.17	0.48	4.65667	3.27819	1.26382e-09	7.40315e-08	-	Protein of unknown function DUF1645 family protein	-	-	-	-	-	-	-
Os03g0437200	6	0	3	129	103	122	0.16	0	0.08	3.22	2.69	3.85	0.08	3.25333	5.34577	1.37984e-09	8.04684e-08	ZFP36	C2H2-type zinc finger protein, Abscisic acid-induced antioxidant defence, Water stress and oxidative stress toleranc	-	-	-	-	-	GO:0003676//nucleic acid binding;GO:0003677//DNA binding;GO:0046872//metal ion binding	GO:0006979//response to oxidative stress;GO:0009414//response to water deprivation
Os12g0170100	22	9	23	169	226	200	0.27	0.1	0.27	1.9	2.67	2.85	0.213333	2.47333	3.53528	1.38365e-09	8.04684e-08	-	Similar to DNA-binding protein	-	-	-	-	GO:0005739//mitochondrion	GO:0003677//DNA binding;GO:0005515//protein binding	-
Os05g0565000	23	13	24	188	241	206	0.71	0.37	0.71	5.32	7.16	7.39	0.596667	6.62333	3.47256	1.38579e-09	8.04684e-08	RPL18A	Similar to 60S ribosomal protein L18a-1	Genetic Information Processing	Translation	ko03010//Ribosome	K02882	GO:0005840//ribosome;GO:0022625//cytosolic large ribosomal subunit	GO:0003735//structural constituent of ribosome	GO:0006412//translation
Os10g0411700	163	77	219	1017	1282	884	8.55	3.71	11.11	49.14	64.92	54.06	7.79	56.04	2.84676	1.46024e-09	8.4546e-08	OsRPS28	Similar to S28 ribosomal protein (Fragment)	Genetic Information Processing	Translation	ko03010//Ribosome	K02979	GO:0005840//ribosome;GO:0022627//cytosolic small ribosomal subunit	GO:0003735//structural constituent of ribosome	GO:0000028//ribosomal small subunit assembly;GO:0006412//translation;GO:0030490//maturation of SSU-rRNA
Os01g0746200	39	20	36	365	334	228	0.47	0.21	0.4	3.85	3.72	3.04	0.36	3.53667	3.29632	1.46847e-09	8.47766e-08	NUP85	Nucleoporin, Common symbiosis signaling (SYM) pathwa	Genetic Information Processing	Translation	ko03013//RNA transport	K14304	GO:0005634//nucleus;GO:0005635//nuclear envelope;GO:0005643//nuclear pore;GO:0016020//membrane;GO:0031080//nuclear pore outer ring;GO:0031965//nuclear membrane	GO:0017056//structural constituent of nuclear pore	GO:0006406//mRNA export from nucleus;GO:0006606//protein import into nucleus;GO:0006913//nucleocytoplasmic transport;GO:0009737//response to abscisic acid;GO:0015031//protein transport;GO:0045893//positive regulation of transcription, DNA-templated;GO:0051028//mRNA transport
Os07g0262200	79	26	71	372	508	382	1.94	0.59	1.69	8.42	12.05	10.94	1.40667	10.47	2.89591	1.50429e-09	8.65943e-08	-	Similar to Prohibitin	-	-	-	-	GO:0005739//mitochondrion;GO:0005743//mitochondrial inner membrane;GO:0016020//membrane	-	-
Os06g0111800	650	286	531	2427	3141	2151	6.06	2.54	4.88	21.9	29.21	24.07	4.49333	25.06	2.47953	1.51873e-09	8.71742e-08	OsCSLD2	Similar to CSLD2 (Fragment)	-	-	-	-	GO:0000139//Golgi membrane;GO:0005794//Golgi apparatus;GO:0005802//trans-Golgi network;GO:0005886//plasma membrane;GO:0016020//membrane;GO:0016021//integral component of membrane	GO:0016740//transferase activity;GO:0016757//transferase activity, transferring glycosyl groups;GO:0016760//cellulose synthase (UDP-forming) activity;GO:0051753//mannan synthase activity	GO:0009833//plant-type primary cell wall biogenesis;GO:0030244//cellulose biosynthetic process;GO:0071555//cell wall organization;GO:0097502//mannosylation
Os05g0177500	136	39	30	9	5	2	2.2	0.58	0.47	0.13	0.08	0.04	1.08333	0.0833333	-3.70044	1.6459e-09	9.40833e-08	-	UDP-glucuronosyl/UDP-glucosyltransferase family protein	Metabolism;Metabolism	Global and overview maps;Metabolism of terpenoids and polyketides	ko01110//Biosynthesis of secondary metabolites;ko00908//Zeatin biosynthesis	K13496;K13496	GO:0043231//intracellular membrane-bounded organelle	GO:0008194//UDP-glycosyltransferase activity;GO:0016740//transferase activity;GO:0016757//transferase activity, transferring glycosyl groups;GO:0016758//transferase activity, transferring hexosyl groups	-
Os01g0836800	421	200	485	2111	2503	1755	7.6	3.32	8.58	35.11	43.82	36.78	6.5	38.57	2.56897	1.64852e-09	9.40833e-08	-	Transmembrane receptor, eukaryota domain containing protein	-	-	-	-	GO:0016020//membrane;GO:0016021//integral component of membrane	-	-
Os01g0677900	160	36	232	1508	1925	1118	1.54	0.32	2.17	13.41	17.94	12.58	1.34333	14.6433	3.44635	1.82439e-09	1.03529e-07	-	Protein of unknown function DUF2921 domain containing protein	-	-	-	-	GO:0016021//integral component of membrane;GO:0043231//intracellular membrane-bounded organelle	-	-
Os12g0105600	41	11	46	302	453	268	0.85	0.21	0.92	5.79	9.1	6.5	0.66	7.13	3.43336	1.86742e-09	1.0567e-07	-	Similar to Phosphate starvation regulator protein (Regulatory protein of P- starvation acclimation response Psr1)	-	-	-	-	GO:0005634//nucleus	GO:0003677//DNA binding	-
Os01g0236700	8819	6798	6896	3374	2396	4551	78.52	55.55	59.4	27.67	20.59	47.23	64.49	31.83	-1.01869	1.97557e-09	1.11474e-07	-	Octicosapeptide/Phox/Bem1p domain containing protein	-	-	-	-	GO:0005634//nucleus	GO:0003677//DNA binding;GO:0005515//protein binding	-
Os01g0892500	24	2	29	285	373	236	0.5	0.04	0.58	5.45	7.47	5.71	0.373333	6.21	4.05606	2.01056e-09	1.13129e-07	-	Similar to carboxylic ester hydrolase	-	-	-	-	GO:0005576//extracellular region;GO:0005618//cell wall;GO:0009505//plant-type cell wall	GO:0016787//hydrolase activity;GO:0052689//carboxylic ester hydrolase activity;GO:0052793//pectin acetylesterase activity	GO:0071555//cell wall organization
Os12g0443500	43	27	31	284	475	312	0.68	0.39	0.48	4.16	7.3	5.79	0.516667	5.75	3.47626	2.0398e-09	1.14452e-07	-	Similar to UDP-glucose 6-dehydrogenase (EC 1.1.1.22) (UDP-Glc dehydrogenase) (UDP-GlcDH) (UDPGDH)	Metabolism;Metabolism;Metabolism;Metabolism	Global and overview maps;Carbohydrate metabolism;Carbohydrate metabolism;Carbohydrate metabolism	ko01100//Metabolic pathways;ko00520//Amino sugar and nucleotide sugar metabolism;ko00040//Pentose and glucuronate interconversions;ko00053//Ascorbate and aldarate metabolism	K00012;K00012;K00012;K00012	GO:0005634//nucleus;GO:0005829//cytosol	GO:0003979//UDP-glucose 6-dehydrogenase activity;GO:0016491//oxidoreductase activity;GO:0016616//oxidoreductase activity, acting on the CH-OH group of donors, NAD or NADP as acceptor;GO:0051287//NAD binding	GO:0006024//glycosaminoglycan biosynthetic process;GO:0006065//UDP-glucuronate biosynthetic process;GO:0055114//oxidation-reduction process
Os03g0422800	9	1	12	174	166	124	0.1	0.01	0.13	1.79	1.79	1.61	0.08	1.73	4.43463	2.05379e-09	1.14915e-07	-	Similar to D-mannose binding lectin family protein, expressed	-	-	-	-	GO:0005886//plasma membrane;GO:0016020//membrane;GO:0016021//integral component of membrane	GO:0000166//nucleotide binding;GO:0004672//protein kinase activity;GO:0004674//protein serine/threonine kinase activity;GO:0005524//ATP binding;GO:0016301//kinase activity;GO:0016740//transferase activity	GO:0006468//protein phosphorylation;GO:0016310//phosphorylation;GO:0048544//recognition of pollen
Os05g0551900	0	0	0	75	295	58	0	0	0	0.87	3.58	0.85	0.001	1.76667	10.7868	2.0737e-09	1.15704e-07	-	Similar to EMB1865 (embryo defective 1865); RNA binding	-	-	-	-	GO:0009507//chloroplast	GO:0003723//RNA binding	GO:0009737//response to abscisic acid
Os01g0668901	0	0	0	86	126	74	0	0	0	0.93	1.43	1.01	0.001	1.12333	10.1336	2.16823e-09	1.20458e-07	-	Protein kinase, catalytic domain domain containing protein	-	-	-	-	GO:0005886//plasma membrane;GO:0016020//membrane;GO:0016021//integral component of membrane	GO:0000166//nucleotide binding;GO:0004672//protein kinase activity;GO:0004674//protein serine/threonine kinase activity;GO:0004675//transmembrane receptor protein serine/threonine kinase activity;GO:0005524//ATP binding;GO:0016301//kinase activity;GO:0016740//transferase activity	GO:0006468//protein phosphorylation;GO:0007178//transmembrane receptor protein serine/threonine kinase signaling pathway;GO:0016310//phosphorylation;GO:0048544//recognition of pollen
Os08g0259100	22	26	45	0	0	0	0.3	0.33	0.6	0	0	0	0.41	0.001	-8.67948	2.19791e-09	1.21615e-07	-	Conserved hypothetical protein	-	-	-	-	-	-	-
Os11g0171500	85	24	43	372	666	396	1	0.26	0.49	4.03	7.57	5.43	0.583333	5.67667	3.28265	2.25138e-09	1.23978e-07	CDPK24	Calcium-dependent protein kinas	Organismal Systems	Environmental adaptation	ko04626//Plant-pathogen interaction	K13412	GO:0005634//nucleus;GO:0005737//cytoplasm	GO:0000166//nucleotide binding;GO:0004672//protein kinase activity;GO:0004674//protein serine/threonine kinase activity;GO:0004683//calmodulin-dependent protein kinase activity;GO:0005509//calcium ion binding;GO:0005516//calmodulin binding;GO:0005524//ATP binding;GO:0009931//calcium-dependent protein serine/threonine kinase activity;GO:0010857//calcium-dependent protein kinase activity;GO:0016301…	GO:0006468//protein phosphorylation;GO:0009738//abscisic acid-activated signaling pathway;GO:0016310//phosphorylation;GO:0018105//peptidyl-serine phosphorylation;GO:0035556//intracellular signal transduction;GO:0046777//protein autophosphorylation
Os11g0220800	366	115	276	1329	1714	1180	10.51	3.03	7.67	35.15	47.51	39.5	7.07	40.72	2.52596	2.38656e-09	1.30966e-07	-	Similar to 60S ribosomal protein L10 (QM protein homolog)	Genetic Information Processing	Translation	ko03010//Ribosome	K02866	GO:0005840//ribosome;GO:0022625//cytosolic large ribosomal subunit	GO:0003735//structural constituent of ribosome	GO:0000027//ribosomal large subunit assembly;GO:0006412//translation
Os04g0442200	3093	1939	2413	1393	704	1371	53.08	30.54	40.07	22.02	11.67	27.42	41.23	20.37	-1.01725	2.4506e-09	1.34112e-07	-	Protein of unknown function DUF482 family protein	-	-	-	-	-	-	-
Os12g0639600	36	8	132	1535	1438	1006	0.44	0.09	1.55	17.12	16.85	14.19	0.693333	16.0533	4.53318	2.61115e-09	1.41422e-07	-	Similar to Hedgehog-interacting-like protein	-	-	-	-	-	GO:0003824//catalytic activity	-
Os03g0831100	5	0	12	164	211	135	0.07	0	0.15	1.97	2.65	2.05	0.0733333	2.22333	4.92211	2.61251e-09	1.41422e-07	-	Armadillo-like helical domain containing protein	-	-	-	-	GO:0005730//nucleolus	GO:0003723//RNA binding;GO:0003729//mRNA binding	GO:0006417//regulation of translation;GO:0009793//embryo development ending in seed dormancy
Os01g0938100	1163	354	537	210	315	396	48.03	13.42	21.45	7.99	12.56	19.06	27.6333	13.2033	-1.06551	2.77957e-09	1.49655e-07	PSB28	Photosystem II protein Psb28, class 1 domain containing protein	Metabolism	Energy metabolism	ko00195//Photosynthesis	K08903	GO:0009507//chloroplast;GO:0009523//photosystem II;GO:0009535//chloroplast thylakoid membrane;GO:0009536//plastid;GO:0009570//chloroplast stroma;GO:0009579//thylakoid;GO:0009654//photosystem II oxygen evolving complex;GO:0016020//membrane	-	GO:0015979//photosynthesis
Os05g0149400	466	79	508	2920	3821	2968	10.54	1.64	11.11	60.77	83.35	78.17	7.76333	74.0967	3.25466	2.79499e-09	1.50081e-07	ACO5	ACC oxidase, Ethylene biosynthesi	Metabolism;Metabolism;Metabolism	Global and overview maps;Global and overview maps;Amino acid metabolism	ko01100//Metabolic pathways;ko01110//Biosynthesis of secondary metabolites;ko00270//Cysteine and methionine metabolism	K05933;K05933;K05933	-	GO:0016491//oxidoreductase activity;GO:0046872//metal ion binding;GO:0051213//dioxygenase activity	GO:0055114//oxidation-reduction process
Os04g0487200	863	300	685	2730	3004	2563	9.36	2.98	7.18	27.26	31.44	32.39	6.50667	30.3633	2.22234	2.87033e-09	1.53713e-07	-	Serine/threonine protein kinase domain containing protein	-	-	-	-	GO:0016020//membrane;GO:0016021//integral component of membrane	GO:0004672//protein kinase activity;GO:0005515//protein binding;GO:0005524//ATP binding	GO:0006468//protein phosphorylation
Os04g0127200	131	49	219	1647	1168	995	1.47	0.5	2.45	17.6	13.14	13.45	1.47333	14.73	3.3216	2.94277e-09	1.56785e-07	OsSub37	Hypothetical conserved gene	-	-	-	-	-	GO:0004252//serine-type endopeptidase activity	GO:0006508//proteolysis
Os04g0581000	8	4	50	688	422	642	0.17	0.08	1.06	13.82	8.89	16.33	0.436667	13.0133	4.89731	2.9434e-09	1.56785e-07	-	Similar to Flavanone 3-hydroxylase (Fragment)	-	-	-	-	-	GO:0016491//oxidoreductase activity;GO:0046872//metal ion binding;GO:0051213//dioxygenase activity	GO:0055114//oxidation-reduction process
Os08g0124000	10	5	32	307	488	209	0.12	0.05	0.36	3.35	5.68	2.9	0.176667	3.97667	4.49246	3.00866e-09	1.59835e-07	-	Similar to Resistance protein candidate (Fragment)	-	-	-	-	GO:0005886//plasma membrane;GO:0016021//integral component of membrane	GO:0004672//protein kinase activity;GO:0004675//transmembrane receptor protein serine/threonine kinase activity;GO:0005524//ATP binding;GO:0030246//carbohydrate binding	GO:0002229//defense response to oomycetes;GO:0006468//protein phosphorylation;GO:0006952//defense response;GO:0007178//transmembrane receptor protein serine/threonine kinase signaling pathway;GO:0042742//defense response to bacterium
Os01g0207400	115	47	98	10	0	13	3.49	1.32	2.88	0.27	0	0.45	2.56333	0.24	-3.41691	3.03736e-09	1.60932e-07	-	Similar to peptide-N4-asparagine amidase A	-	-	-	-	GO:0005773//vacuole	-	-
Os04g0491100	3	1	0	112	127	91	0.03	0.01	0	0.92	1.09	0.95	0.0133333	0.986667	6.20945	3.0657e-09	1.62003e-07	-	NB-ARC domain containing protein	-	-	-	-	-	-	-
Os07g0124500	320	92	237	1269	1326	1029	2.96	0.78	2.12	10.8	11.83	11.09	1.95333	11.24	2.52463	3.0769e-09	1.62167e-07	eIF-3c	Similar to Eukaryotic translation initiation factor 3 subunit 8 (eIF3 p110) (eIF3c)	Genetic Information Processing	Translation	ko03013//RNA transport	K03252	GO:0005737//cytoplasm;GO:0005852//eukaryotic translation initiation factor 3 complex;GO:0016282//eukaryotic 43S preinitiation complex;GO:0033290//eukaryotic 48S preinitiation complex	GO:0003723//RNA binding;GO:0003743//translation initiation factor activity;GO:0031369//translation initiation factor binding	GO:0001732//formation of cytoplasmic translation initiation complex;GO:0002183//cytoplasmic translational initiation;GO:0006412//translation;GO:0006413//translational initiation
Os01g0120800	253	85	327	1432	1845	1332	4.46	1.36	6.01	22.92	28.78	23.95	3.94333	25.2167	2.67689	3.139e-09	1.65004e-07	eIF-3a	Similar to Eukaryotic translation initiation factor 3 subunit 10 (eIF-3 theta) (Eukaryotic translation initiation factor 3 large subunit) (eIF3a)	Genetic Information Processing	Translation	ko03013//RNA transport	K03254	GO:0005737//cytoplasm;GO:0005829//cytosol;GO:0005852//eukaryotic translation initiation factor 3 complex;GO:0005886//plasma membrane;GO:0016021//integral component of membrane;GO:0016282//eukaryotic 43S preinitiation complex;GO:0033290//eukaryotic 48S preinitiation complex;GO:0043614//multi-eIF complex;GO:0071540//eukaryotic translation initiation factor 3 complex, eIF3e;GO:0071541//eukaryotic tr…	GO:0003723//RNA binding;GO:0003729//mRNA binding;GO:0003743//translation initiation factor activity	GO:0001732//formation of cytoplasmic translation initiation complex;GO:0002183//cytoplasmic translational initiation;GO:0002188//translation reinitiation;GO:0006412//translation;GO:0006413//translational initiation
Os03g0780500	53	14	52	334	481	286	1.13	0.14	1.05	7.04	9.39	7.05	0.773333	7.82667	3.33924	3.14877e-09	1.65083e-07	OsCBSIMPDH1	Similar to inosine-5-monophosphate dehydrogenase 2	Metabolism;Metabolism;Metabolism	Global and overview maps;Global and overview maps;Nucleotide metabolism	ko01100//Metabolic pathways;ko01110//Biosynthesis of secondary metabolites;ko00230//Purine metabolism	K00088;K00088;K00088	GO:0005737//cytoplasm	GO:0003824//catalytic activity;GO:0003938//IMP dehydrogenase activity;GO:0016491//oxidoreductase activity;GO:0046872//metal ion binding	GO:0006164//purine nucleotide biosynthetic process;GO:0006177//GMP biosynthetic process;GO:0006183//GTP biosynthetic process;GO:0055114//oxidation-reduction process
Os04g0576500	32	12	29	189	276	224	0.75	0.26	0.66	4.07	6.22	6.1	0.556667	5.46333	3.2949	3.5002e-09	1.82074e-07	-	Peptidase C1A, papain C-terminal domain containing protein	-	-	-	-	-	GO:0008234//cysteine-type peptidase activity	GO:0006508//proteolysis
Os01g0550000	100	30	118	671	563	600	1.99	0.47	1.95	12.29	10.45	12.59	1.47	11.7767	3.00204	3.8749e-09	2.01042e-07	AIP2	DEAD-like helicase, N-terminal domain containing protein	Genetic Information Processing;Genetic Information Processing;Genetic Information Processing	Transcription;Translation;Translation	ko03040//Spliceosome;ko03013//RNA transport;ko03015//mRNA surveillance pathway	K12812;K12812;K12812	GO:0000346//transcription export complex;GO:0005634//nucleus	GO:0000166//nucleotide binding;GO:0003676//nucleic acid binding;GO:0003723//RNA binding;GO:0003724//RNA helicase activity;GO:0004386//helicase activity;GO:0005515//protein binding;GO:0005524//ATP binding;GO:0016787//hydrolase activity	GO:0000398//mRNA splicing, via spliceosome;GO:0009555//pollen development;GO:0048653//anther development
Os05g0597100	15	4	11	170	179	114	0.35	0.08	0.25	3.61	4	3.07	0.226667	3.56	3.97323	4.12786e-09	2.12862e-07	HDT1	Histone H4 deacetylase, Negative regulation of innate immunit	-	-	-	-	GO:0005730//nucleolus	GO:0003676//nucleic acid binding	-
Os09g0378300	134	37	138	738	782	601	1.06	0.27	1.05	5.35	5.95	5.52	0.793333	5.60667	2.82114	4.13469e-09	2.12862e-07	-	Similar to Leucyl-tRNA synthetase, cytoplasmic (EC 6.1.1.4) (Leucine--tRNA ligase) (LeuRS)	Genetic Information Processing	Translation	ko00970//Aminoacyl-tRNA biosynthesis	K01869	GO:0005737//cytoplasm	GO:0000166//nucleotide binding;GO:0002161//aminoacyl-tRNA editing activity;GO:0004812//aminoacyl-tRNA ligase activity;GO:0004823//leucine-tRNA ligase activity;GO:0005524//ATP binding;GO:0016874//ligase activity	GO:0006412//translation;GO:0006418//tRNA aminoacylation for protein translation;GO:0006429//leucyl-tRNA aminoacylation
Os04g0209200	50	13	39	661	207	828	0.36	0.08	0.27	4.43	1.45	7.02	0.236667	4.3	4.18341	4.24921e-09	2.18195e-07	OsABCC9	Similar to MRP-like ABC transporter	Environmental Information Processing	Membrane transport	ko02010//ABC transporters	K05665	GO:0000325//plant-type vacuole;GO:0005774//vacuolar membrane;GO:0016020//membrane;GO:0016021//integral component of membrane	GO:0000166//nucleotide binding;GO:0005524//ATP binding;GO:0016887//ATPase activity;GO:0042626//ATPase activity, coupled to transmembrane movement of substances	GO:0055085//transmembrane transport
MSTRG.16273	334	80	204	20	6	54	1.15	0.25	0.68	0.06	0.02	0.22	0.693333	0.1	-2.79355	4.39167e-09	2.24932e-07	--	Os03g0665301 [Oryza sativa Japonica Group]	-	-	-	-	-	-	-
Os03g0244700	8	0	3	116	199	97	0.1	0	0.04	1.39	2.5	1.47	0.0466667	1.78667	5.25873	4.42141e-09	2.25876e-07	-	Armadillo-like helical domain containing protein	-	-	-	-	-	GO:0005515//protein binding	-
Os06g0134000	102	24	74	459	510	423	4.36	0.94	3.06	18.06	21.03	21.06	2.78667	20.05	2.84699	4.4751e-09	2.28021e-07	RPS20	Similar to 40S ribosomal protein S20	Genetic Information Processing	Translation	ko03010//Ribosome	K02969	GO:0005840//ribosome;GO:0015935//small ribosomal subunit;GO:0022627//cytosolic small ribosomal subunit	GO:0003723//RNA binding;GO:0003735//structural constituent of ribosome	GO:0006412//translation
Os03g0316200	161	58	184	783	1540	893	3.41	1.13	3.78	15.27	31.48	22.05	2.77333	22.9333	3.04775	4.48621e-09	2.28021e-07	OsGolS1	Similar to Galactinol synthase (Fragment)	Metabolism;Metabolism	Global and overview maps;Carbohydrate metabolism	ko01100//Metabolic pathways;ko00052//Galactose metabolism	K18819;K18819	-	GO:0016740//transferase activity;GO:0016757//transferase activity, transferring glycosyl groups;GO:0047216//inositol 3-alpha-galactosyltransferase activity	GO:0006012//galactose metabolic process
Os02g0618000	20	5	15	199	203	131	1.07	0.25	0.78	9.81	10.48	8.17	0.7	9.48667	3.76047	4.63559e-09	2.35015e-07	-	Non-protein coding transcript	-	-	-	-	-	-	-
MSTRG.25008	10	9	26	233	235	207	0.06	0.05	0.21	1.7	1.54	1.5	0.106667	1.58	3.88874	4.74848e-09	2.40129e-07	NRPA1	DNA-directed RNA polymerase I subunit 1 [Oryza sativa Japonica Group]	Genetic Information Processing	Transcription	ko03020//RNA polymerase	K02999	GO:0005911//cell-cell junction;GO:0043231//intracellular membrane-bounded organelle;GO:0044444//cytoplasmic part	GO:0003676//nucleic acid binding;GO:0016779//nucleotidyltransferase activity	GO:0006405//RNA export from nucleus;GO:0006886//intracellular protein transport;GO:0032774//RNA biosynthetic process;GO:0034645//cellular macromolecule biosynthetic process
Os02g0743400	524	208	330	114	125	230	6.64	2.42	4.05	1.33	1.53	3.4	4.37	2.08667	-1.06643	4.90594e-09	2.47465e-07	PIN1A	Auxin transport protein REH1	-	-	-	-	GO:0005783//endoplasmic reticulum;GO:0005886//plasma membrane;GO:0009921//auxin efflux carrier complex;GO:0016020//membrane;GO:0016021//integral component of membrane	GO:0005215//transporter activity;GO:0010329//auxin efflux transmembrane transporter activity	GO:0009734//auxin-activated signaling pathway;GO:0009926//auxin polar transport;GO:0010252//auxin homeostasis;GO:0010315//auxin efflux;GO:0048830//adventitious root development;GO:0055085//transmembrane transport
Os04g0195000	0	71	0	0	0	0	0	0.6	0	0	0	0	0.2	0.001	-7.64386	4.92478e-09	2.4779e-07	OsWD40-99	Similar to Vacuolar assembly protein VPS41 homolog	-	-	-	-	GO:0005770//late endosome;GO:0030897//HOPS complex	GO:0005515//protein binding	GO:0006623//protein targeting to vacuole;GO:0006886//intracellular protein transport;GO:0009630//gravitropism;GO:0015031//protein transport;GO:0016192//vesicle-mediated transport;GO:0035542//regulation of SNARE complex assembly;GO:0042144//vacuole fusion, non-autophagic;GO:0046907//intracellular transport
Os08g0498100	386	101	150	1525	1638	1437	10.45	2.5	3.93	38.03	42.8	45.34	5.62667	42.0567	2.90198	5.13389e-09	2.57662e-07	OsOMT26	Similar to Caffeoyl-CoA O-methyltransferase 2 (EC 2.1.1.104) (Trans-caffeoyl-CoA 3-O-methyltransferase 2) (CCoAMT-2) (CCoAOMT-2)	-	-	-	-	GO:0005634//nucleus	GO:0008168//methyltransferase activity;GO:0008171//O-methyltransferase activity;GO:0008757//S-adenosylmethionine-dependent methyltransferase activity;GO:0016740//transferase activity;GO:0046872//metal ion binding	GO:0032259//methylation
Os03g0350100	13	10	17	148	214	176	0.21	0.15	0.26	2.16	3.26	3.24	0.206667	2.88667	3.80403	5.20036e-09	2.60344e-07	BIP101	SAR DNA-binding protein-2	Genetic Information Processing	Translation	ko03008//Ribosome biogenesis in eukaryotes	K14565	GO:0031428//box C/D snoRNP complex;GO:0032040//small-subunit processome	GO:0030515//snoRNA binding	-
Os10g0575800	0	68	0	0	0	0	0	0.39	0	0	0	0	0.13	0.001	-7.02237	5.40351e-09	2.69838e-07	-	Conserved hypothetical protein	-	-	-	-	GO:0005737//cytoplasm;GO:0031931//TORC1 complex;GO:0031932//TORC2 complex;GO:0070209//ASTRA complex	-	GO:0032006//regulation of TOR signaling
Os01g0723600	0	0	0	105	43	186	0	0	0	1.76	0.76	3.95	0.001	2.15667	11.0746	5.43156e-09	2.69889e-07	-	Ribose-phosphate pyrophosphokinase 3 (EC 2.7.6.1) (Phosphoribosyl pyrophosphate synthetase 3)	-	-	-	-	GO:0002189//ribose phosphate diphosphokinase complex;GO:0005737//cytoplasm;GO:0009507//chloroplast;GO:0009536//plastid	GO:0000166//nucleotide binding;GO:0000287//magnesium ion binding;GO:0004749//ribose phosphate diphosphokinase activity;GO:0005524//ATP binding;GO:0016301//kinase activity;GO:0016740//transferase activity;GO:0046872//metal ion binding	GO:0006015//5-phosphoribose 1-diphosphate biosynthetic process;GO:0006164//purine nucleotide biosynthetic process;GO:0009116//nucleoside metabolic process;GO:0009165//nucleotide biosynthetic process;GO:0016310//phosphorylation
Os06g0649000	0	0	6	109	167	135	0	0	0.12	2.11	3.39	3.3	0.04	2.93333	6.1964	5.47121e-09	2.71185e-07	WRKY28	PAMP (pathogen-associated molecular pattern)-responsive transrepressor, Defense respons	-	-	-	-	-	GO:0003700//transcription factor activity, sequence-specific DNA binding;GO:0043565//sequence-specific DNA binding	GO:0006355//regulation of transcription, DNA-templated
Os12g0222300	10	5	8	112	126	155	0.51	0.24	0.39	5.3	6.28	9.31	0.38	6.96333	4.19571	5.50955e-09	2.72409e-07	-	Conserved hypothetical protein	-	-	-	-	-	-	-
Os02g0478600	12	3	8	124	139	118	0.51	0.12	0.33	4.87	5.72	5.87	0.32	5.48667	4.09979	5.57274e-09	2.747e-07	RPS15a	Similar to 40S ribosomal protein S15A	Genetic Information Processing	Translation	ko03010//Ribosome	K02957	GO:0005840//ribosome;GO:0022627//cytosolic small ribosomal subunit	GO:0003735//structural constituent of ribosome	GO:0006412//translation
Os01g0248500	16	11	27	192	208	271	0.36	0.23	0.59	4	4.54	7.15	0.393333	5.23	3.73299	5.58338e-09	2.747e-07	-	Similar to Pathogen-related protein	-	-	-	-	-	-	-
Os12g0194100	16	11	16	241	144	219	0.24	0.16	0.24	3.39	2.13	3.91	0.213333	3.14333	3.88111	6.12215e-09	3.00467e-07	-	Conserved hypothetical protein	-	-	-	-	-	-	-
Os07g0575500	244	49	100	32	10	29	3.95	0.73	1.56	0.48	0.16	0.55	2.08	0.396667	-2.39058	6.18019e-09	3.01866e-07	-	Similar to beta-hexosaminidase	Metabolism;Metabolism;Metabolism;Metabolism;Metabolism;Metabolism;Metabolism	Global and overview maps;Carbohydrate metabolism;Glycan biosynthesis and metabolism;Glycan biosynthesis and metabolism;Glycan biosynthesis and metabolism;Glycan biosynthesis and metabolism;Glycan biosynthesis and metabolism	ko01100//Metabolic pathways;ko00520//Amino sugar and nucleotide sugar metabolism;ko00513//Various types of N-glycan biosynthesis;ko00511//Other glycan degradation;ko00531//Glycosaminoglycan degradation;ko00603//Glycosphingolipid biosynthesis - globo and isoglobo series;ko00604//Glycosphingolipid biosynthesis - ganglio series	K12373;K12373;K12373;K12373;K12373;K12373;K12373	-	GO:0004553//hydrolase activity, hydrolyzing O-glycosyl compounds;GO:0004563//beta-N-acetylhexosaminidase activity;GO:0016787//hydrolase activity;GO:0016798//hydrolase activity, acting on glycosyl bonds	GO:0005975//carbohydrate metabolic process;GO:0008152//metabolic process
Os04g0412500	566	162	433	104	71	202	14.02	3.69	10.37	2.38	1.69	5.82	9.36	3.29667	-1.5055	6.1881e-09	3.01866e-07	OsalphaCA2	Similar to OSIGBa0134P10.2 protein	Metabolism;Metabolism	Global and overview maps;Energy metabolism	ko01100//Metabolic pathways;ko00910//Nitrogen metabolism	K01674;K01674	-	GO:0004089//carbonate dehydratase activity;GO:0008270//zinc ion binding;GO:0046872//metal ion binding	-
Os05g0217800	62	8	37	0	0	0	1.63	0.19	0.94	0	0	0	0.92	0.001	-9.84549	6.19599e-09	3.01866e-07	OsBURP02	BURP domain containing protein	-	-	-	-	-	-	-
Os06g0597900	829	312	564	321	161	316	17.77	6.14	11.7	6.34	3.33	7.9	11.87	5.85667	-1.01917	6.35828e-09	3.09018e-07	-	SOUL haem-binding protein domain containing protein	-	-	-	-	GO:0009507//chloroplast;GO:0009534//chloroplast thylakoid;GO:0009535//chloroplast thylakoid membrane;GO:0009941//chloroplast envelope	GO:0020037//heme binding	GO:0006979//response to oxidative stress
Os05g0427400	466	84	227	2265	2125	1554	6.43	1.06	3.03	28.8	28.32	25	3.50667	27.3733	2.9646	7.03687e-09	3.40343e-07	OsPAL04	Similar to Phenylalanine ammonia-lyase	Metabolism;Metabolism;Metabolism;Metabolism	Global and overview maps;Global and overview maps;Biosynthesis of other secondary metabolites;Amino acid metabolism	ko01100//Metabolic pathways;ko01110//Biosynthesis of secondary metabolites;ko00940//Phenylpropanoid biosynthesis;ko00360//Phenylalanine metabolism	K10775;K10775;K10775;K10775	GO:0005737//cytoplasm	GO:0003824//catalytic activity;GO:0016829//lyase activity;GO:0016841//ammonia-lyase activity;GO:0045548//phenylalanine ammonia-lyase activity	GO:0006559//L-phenylalanine catabolic process;GO:0009698//phenylpropanoid metabolic process;GO:0009800//cinnamic acid biosynthetic process
Os01g0575200	25	11	10	200	357	167	0.37	0.15	0.14	2.75	5.14	2.9	0.22	3.59667	4.03109	7.14535e-09	3.44096e-07	OsbHLH024	Helix-loop-helix DNA-binding domain containing protein	-	-	-	-	GO:0005634//nucleus	GO:0046983//protein dimerization activity	GO:0006355//regulation of transcription, DNA-templated
Os06g0726300	47	30	37	358	414	272	1.13	0.66	0.86	7.93	9.62	7.63	0.883333	8.39333	3.24821	7.16615e-09	3.44096e-07	NAC95	NAC transcription factor, Drought and cold stress toleranc	-	-	-	-	GO:0005634//nucleus	GO:0003677//DNA binding	GO:0006355//regulation of transcription, DNA-templated
Os10g0518300	58	33	88	498	464	430	0.89	0.47	1.31	7.07	6.91	7.73	0.89	7.23667	3.02345	7.68472e-09	3.67231e-07	-	Tetratricopeptide-like helical domain containing protein	-	-	-	-	-	GO:0005515//protein binding	-
Os09g0115400	628	217	617	2308	2932	2211	12.9	4.39	12.74	46.73	62.53	54.93	10.01	54.73	2.45089	7.93967e-09	3.78508e-07	OsPABPC1	Similar to Poly(A)-binding protein	Genetic Information Processing;Genetic Information Processing;Genetic Information Processing	Translation;Folding, sorting and degradation;Translation	ko03013//RNA transport;ko03018//RNA degradation;ko03015//mRNA surveillance pathway	K13126;K13126;K13126	GO:0005634//nucleus;GO:0005737//cytoplasm;GO:0005829//cytosol;GO:1990904//ribonucleoprotein complex	GO:0003676//nucleic acid binding;GO:0003723//RNA binding;GO:0003730//mRNA 3'-UTR binding;GO:0008143//poly(A) binding;GO:0008266//poly(U) RNA binding	-
Os10g0178500	236	75	212	952	1585	929	4.08	1.19	3.55	15.17	26.48	18.74	2.94	20.13	2.77546	8.36175e-09	3.97681e-07	OsUGT98B3	UDP-glucuronosyl/UDP-glucosyltransferase family protein	Metabolism;Metabolism	Global and overview maps;Metabolism of terpenoids and polyketides	ko01110//Biosynthesis of secondary metabolites;ko00908//Zeatin biosynthesis	K13496;K13496	GO:0043231//intracellular membrane-bounded organelle	GO:0008194//UDP-glycosyltransferase activity;GO:0016740//transferase activity;GO:0016757//transferase activity, transferring glycosyl groups;GO:0016758//transferase activity, transferring hexosyl groups	-
Os06g0210500	86	48	51	461	606	445	1.81	0.93	1.04	8.95	12.33	10.93	1.26	10.7367	3.09105	8.49653e-09	4.03131e-07	OsPT18	Similar to Mitochondrial phosphate transporter	-	-	-	-	GO:0016020//membrane;GO:0016021//integral component of membrane;GO:0031305//integral component of mitochondrial inner membrane	GO:0005315//inorganic phosphate transmembrane transporter activity	GO:0035435//phosphate ion transmembrane transport
Os11g0644500	100	74	50	19	20	13	1.8	1.22	0.87	0.32	0.35	0.27	1.29667	0.313333	-2.04904	8.74889e-09	4.11899e-07	-	Similar to Transferase family protein, expressed	-	-	-	-	-	GO:0016747//transferase activity, transferring acyl groups other than amino-acyl groups	-
Os12g0169000	0	54	0	0	0	0	0	0.72	0	0	0	0	0.24	0.001	-7.90689	8.77978e-09	4.11899e-07	-	Similar to Amidase family protein, expressed	-	-	-	-	GO:0016020//membrane;GO:0016021//integral component of membrane	GO:0004040//amidase activity	-
Os03g0366350	140	46	56	13	7	23	1.97	0.59	0.76	0.17	0.1	0.38	1.10667	0.216667	-2.35267	8.80505e-09	4.11899e-07	OsFbox141	Similar to F-box domain containing protein	-	-	-	-	-	GO:0005515//protein binding	-
Os01g0974200	580	245	310	86	25	140	37.35	14.55	19.35	5.12	1.56	10.34	23.75	5.67333	-2.06566	8.88265e-09	4.14558e-07	OsMT2c	RicMT (Metallothionein-like protein)	-	-	-	-	-	GO:0046872//metal ion binding	-
Os04g0474900	0	3	0	108	120	179	0	0.04	0	1.6	1.85	3.35	0.0133333	2.26667	7.40939	9.11908e-09	4.246e-07	OsTAGG1	Similar to Cyanogenic beta-glucosidase precursor (EC 3.2.1.21) (Linamarase) (Fragment)	Metabolism;Metabolism;Metabolism;Metabolism;Metabolism	Global and overview maps;Global and overview maps;Biosynthesis of other secondary metabolites;Carbohydrate metabolism;Metabolism of other amino acids	ko01100//Metabolic pathways;ko01110//Biosynthesis of secondary metabolites;ko00940//Phenylpropanoid biosynthesis;ko00500//Starch and sucrose metabolism;ko00460//Cyanoamino acid metabolism	K01188;K01188;K01188;K01188;K01188	-	GO:0004553//hydrolase activity, hydrolyzing O-glycosyl compounds;GO:0008422//beta-glucosidase activity;GO:0016787//hydrolase activity;GO:0016798//hydrolase activity, acting on glycosyl bonds	GO:0005975//carbohydrate metabolic process;GO:0008152//metabolic process
Os01g0357100	7108	8444	5764	1883	1186	3454	96.04	104.41	74.99	23.09	14.75	53.4	91.8133	30.4133	-1.594	9.16067e-09	4.25545e-07	NiR	Ferredoxin-nitrite reductase, Nitrate reduction (assimilation), Determination of regeneration abilit	Metabolism;Metabolism	Global and overview maps;Energy metabolism	ko01100//Metabolic pathways;ko00910//Nitrogen metabolism	K00366;K00366	GO:0009507//chloroplast;GO:0009536//plastid	GO:0016491//oxidoreductase activity;GO:0020037//heme binding;GO:0046872//metal ion binding;GO:0048307//ferredoxin-nitrite reductase activity;GO:0051536//iron-sulfur cluster binding;GO:0051539//4 iron, 4 sulfur cluster binding	GO:0042128//nitrate assimilation;GO:0055114//oxidation-reduction process
Os08g0431300	73	30	71	520	1803	443	1.24	0.47	1.16	8.12	29.51	8.76	0.956667	15.4633	4.01469	9.21304e-09	4.26985e-07	-	Similar to Dihydrolipoamide S-acetyltransferase	Metabolism;Metabolism;Metabolism;Metabolism;Metabolism;Metabolism	Global and overview maps;Global and overview maps;Global and overview maps;Carbohydrate metabolism;Carbohydrate metabolism;Carbohydrate metabolism	ko01100//Metabolic pathways;ko01110//Biosynthesis of secondary metabolites;ko01200//Carbon metabolism;ko00010//Glycolysis / Gluconeogenesis;ko00620//Pyruvate metabolism;ko00020//Citrate cycle (TCA cycle)	K00627;K00627;K00627;K00627;K00627;K00627	-	GO:0016740//transferase activity;GO:0016746//transferase activity, transferring acyl groups	-
Os05g0430800	78	28	50	433	803	330	1.12	0.37	0.69	5.7	11.09	5.5	0.726667	7.43	3.354	9.33432e-09	4.31604e-07	-	Similar to Amidophosphoribosyltransferase, chloroplast precursor (EC 2.4.2.14) (Glutamine phosphoribosylpyrophosphate amidotransferase) (ATASE) (GPAT)	Metabolism;Metabolism;Metabolism;Metabolism	Global and overview maps;Global and overview maps;Nucleotide metabolism;Amino acid metabolism	ko01100//Metabolic pathways;ko01110//Biosynthesis of secondary metabolites;ko00230//Purine metabolism;ko00250//Alanine, aspartate and glutamate metabolism	K00764;K00764;K00764;K00764	-	GO:0004044//amidophosphoribosyltransferase activity;GO:0016740//transferase activity;GO:0016757//transferase activity, transferring glycosyl groups;GO:0046872//metal ion binding;GO:0051536//iron-sulfur cluster binding	GO:0006164//purine nucleotide biosynthetic process;GO:0006189//'de novo' IMP biosynthetic process;GO:0009113//purine nucleobase biosynthetic process;GO:0009116//nucleoside metabolic process
Os01g0235400	172	47	149	727	843	646	2.59	0.64	2.19	10.03	12.26	11.32	1.80667	11.2033	2.63253	9.35644e-09	4.31628e-07	-	Similar to predicted protein	-	-	-	-	GO:0005829//cytosol;GO:0009506//plasmodesma;GO:0016020//membrane	GO:0005515//protein binding;GO:0008536//Ran GTPase binding	GO:0006886//intracellular protein transport
Os03g0136900	1668	467	1129	5075	5449	5021	15.33	3.94	10.04	42.97	48.36	53.8	9.77	48.3767	2.30788	9.49419e-09	4.36973e-07	-	Similar to Aconitate hydratase, cytoplasmic (EC 4.2.1.3) (Citrate hydro-lyase) (Aconitase)	Metabolism;Metabolism;Metabolism;Metabolism;Metabolism;Metabolism;Metabolism	Global and overview maps;Global and overview maps;Global and overview maps;Global and overview maps;Carbohydrate metabolism;Global and overview maps;Carbohydrate metabolism	ko01100//Metabolic pathways;ko01110//Biosynthesis of secondary metabolites;ko01200//Carbon metabolism;ko01230//Biosynthesis of amino acids;ko00630//Glyoxylate and dicarboxylate metabolism;ko01210//2-Oxocarboxylic acid metabolism;ko00020//Citrate cycle (TCA cycle)	K01681;K01681;K01681;K01681;K01681;K01681;K01681	GO:0005739//mitochondrion;GO:0005829//cytosol	GO:0003994//aconitate hydratase activity;GO:0016829//lyase activity;GO:0047780//citrate dehydratase activity;GO:0051536//iron-sulfur cluster binding;GO:0051539//4 iron, 4 sulfur cluster binding	GO:0006099//tricarboxylic acid cycle;GO:0006101//citrate metabolic process
MSTRG.30351	779	234	452	138	316	133	5.9	2.14	5.07	0.67	1.61	1.67	4.37	1.31667	-1.73074	1.00226e-08	4.59178e-07	TAR1-A	cytochrome P450 like_TBP [Gossypium australe]	-	-	-	-	-	-	-
Os10g0529300	122	114	90	14	15	40	3.64	3.12	2.6	0.38	0.43	1.39	3.12	0.733333	-2.08901	1.02517e-08	4.67529e-07	OsGSTU18	Similar to Tau class GST protein 3	Metabolism;Metabolism	Global and overview maps;Metabolism of other amino acids	ko01100//Metabolic pathways;ko00480//Glutathione metabolism	K00799;K00799	GO:0005737//cytoplasm	GO:0004364//glutathione transferase activity;GO:0005515//protein binding;GO:0016740//transferase activity	GO:0006749//glutathione metabolic process
Os01g0266000	35	17	15	279	540	206	0.3	0.13	0.12	2.22	4.5	2.08	0.183333	2.93333	4	1.12475e-08	5.11775e-07	-	RNA-binding protein Lupus La domain containing protein	-	-	-	-	GO:0000932//cytoplasmic mRNA processing body;GO:0005634//nucleus;GO:0005829//cytosol;GO:0010494//cytoplasmic stress granule	GO:0003723//RNA binding;GO:0003729//mRNA binding	GO:0070370//cellular heat acclimation
Os03g0405500	297	51	203	2875	1398	1306	4.29	0.67	2.84	38.24	19.49	21.98	2.6	26.57	3.35321	1.16712e-08	5.28642e-07	-	Similar to PDI-like protein	-	-	-	-	GO:0005623//cell	GO:0016491//oxidoreductase activity;GO:0047134//protein-disulfide reductase activity	GO:0045454//cell redox homeostasis;GO:0055114//oxidation-reduction process
Os05g0519900	317	142	323	1348	1307	1173	4.35	1.55	4.19	16.17	16.21	18.4	3.36333	16.9267	2.33133	1.1707e-08	5.29066e-07	-	Similar to STT3A (STAUROSPORIN AND TEMPERATURE SENSITIVE 3-LIKE A); oligosaccharyl transferase	Metabolism;Genetic Information Processing;Metabolism;Metabolism	Global and overview maps;Folding, sorting and degradation;Glycan biosynthesis and metabolism;Glycan biosynthesis and metabolism	ko01100//Metabolic pathways;ko04141//Protein processing in endoplasmic reticulum;ko00510//N-Glycan biosynthesis;ko00513//Various types of N-glycan biosynthesis	K07151;K07151;K07151;K07151	GO:0016020//membrane;GO:0016021//integral component of membrane	GO:0004576//oligosaccharyl transferase activity	GO:0006486//protein glycosylation
Os11g0649700	0	47	0	0	0	0	0	1.48	0	0	0	0	0.493333	0.001	-8.94642	1.17576e-08	5.29115e-07	-	Uncharacterised protein family UPF0497, trans-membrane plant subgroup domain containing protein	-	-	-	-	GO:0005886//plasma membrane;GO:0016020//membrane;GO:0016021//integral component of membrane	-	-
Os09g0447300	4	4	17	217	792	112	0.07	0.06	0.27	3.26	12.48	2.13	0.133333	5.95667	5.4814	1.1761e-08	5.29115e-07	CYP76L1	Cytochrome P450 family protein	-	-	-	-	GO:0016020//membrane	GO:0004497//monooxygenase activity;GO:0005506//iron ion binding;GO:0016491//oxidoreductase activity;GO:0016705//oxidoreductase activity, acting on paired donors, with incorporation or reduction of molecular oxygen;GO:0016709//oxidoreductase activity, acting on paired donors, with incorporation or reduction of molecular oxygen, NAD(P)H as one donor, and incorporation of one atom of oxygen;GO:00200…	GO:0055114//oxidation-reduction process
Os12g0111800	0	0	0	168	49	75	0	0	0	4.02	1.23	2.27	0.001	2.50667	11.2916	1.19134e-08	5.34764e-07	-	Similar to Class III peroxidase 136	Metabolism;Metabolism;Metabolism	Global and overview maps;Global and overview maps;Biosynthesis of other secondary metabolites	ko01100//Metabolic pathways;ko01110//Biosynthesis of secondary metabolites;ko00940//Phenylpropanoid biosynthesis	K00430;K00430;K00430	GO:0005576//extracellular region	GO:0004601//peroxidase activity;GO:0016491//oxidoreductase activity;GO:0020037//heme binding;GO:0046872//metal ion binding	GO:0006979//response to oxidative stress;GO:0042744//hydrogen peroxide catabolic process;GO:0055114//oxidation-reduction process;GO:0098869//cellular oxidant detoxification
Os08g0507702	854	170	559	267	265	204	14.48	2.65	9.17	4.17	4.34	4.03	8.76667	4.18	-1.06853	1.23432e-08	5.52813e-07	-	Cytochrome P450 family protein	-	-	-	-	GO:0016020//membrane	GO:0004497//monooxygenase activity;GO:0005506//iron ion binding;GO:0016491//oxidoreductase activity;GO:0016705//oxidoreductase activity, acting on paired donors, with incorporation or reduction of molecular oxygen;GO:0016709//oxidoreductase activity, acting on paired donors, with incorporation or reduction of molecular oxygen, NAD(P)H as one donor, and incorporation of one atom of oxygen;GO:00200…	GO:0016102//diterpenoid biosynthetic process;GO:0055114//oxidation-reduction process
Os07g0217600	104	29	135	1853	440	2377	1.71	0.44	2.14	27.98	6.96	45.43	1.43	26.79	4.22761	1.24856e-08	5.57942e-07	CYP71Z2	CytochromeP450 monooxygenase, Diterpenoid phytoalexin biosynthesis, Bacterial blight resistanc	-	-	-	-	GO:0016020//membrane	GO:0004497//monooxygenase activity;GO:0005506//iron ion binding;GO:0016491//oxidoreductase activity;GO:0016705//oxidoreductase activity, acting on paired donors, with incorporation or reduction of molecular oxygen;GO:0016709//oxidoreductase activity, acting on paired donors, with incorporation or reduction of molecular oxygen, NAD(P)H as one donor, and incorporation of one atom of oxygen;GO:00200…	GO:0055114//oxidation-reduction process
Os01g0911200	146	45	156	698	952	643	1.76	0.5	1.81	7.74	11.07	9.02	1.35667	9.27667	2.77354	1.28833e-08	5.74426e-07	-	Ribophorin II family protein	Metabolism;Genetic Information Processing;Metabolism;Metabolism	Global and overview maps;Folding, sorting and degradation;Glycan biosynthesis and metabolism;Glycan biosynthesis and metabolism	ko01100//Metabolic pathways;ko04141//Protein processing in endoplasmic reticulum;ko00510//N-Glycan biosynthesis;ko00513//Various types of N-glycan biosynthesis	K12667;K12667;K12667;K12667	GO:0005739//mitochondrion;GO:0005774//vacuolar membrane;GO:0005783//endoplasmic reticulum;GO:0005789//endoplasmic reticulum membrane;GO:0005794//Golgi apparatus;GO:0005886//plasma membrane;GO:0008250//oligosaccharyltransferase complex;GO:0009505//plant-type cell wall;GO:0009506//plasmodesma;GO:0016020//membrane;GO:0016021//integral component of membrane	GO:0016757//transferase activity, transferring glycosyl groups	GO:0006486//protein glycosylation;GO:0006487//protein N-linked glycosylation;GO:0009409//response to cold
Os04g0479700	11	4	14	152	207	109	0.09	0.03	0.12	1.16	1.65	1.05	0.08	1.28667	4.00749	1.29555e-08	5.75079e-07	-	Similar to Phosphomethylpyrimidine kinase/thiamin-phosphate pyrophosphorylase	-	-	-	-	-	-	-
Os12g0555500	226	80	243	2240	873	2680	8.25	2.68	8.59	75.35	30.78	114.09	6.50667	73.4067	3.49592	1.32772e-08	5.87011e-07	OsPR10a	Pathogen resistance protein PBZ1, 17 kDa RNase, Disease resistanc	-	-	-	-	GO:0005634//nucleus;GO:0005737//cytoplasm	GO:0004864//protein phosphatase inhibitor activity;GO:0010427//abscisic acid binding;GO:0038023//signaling receptor activity	GO:0006952//defense response;GO:0009738//abscisic acid-activated signaling pathway;GO:0032515//negative regulation of phosphoprotein phosphatase activity;GO:0080163//regulation of protein serine/threonine phosphatase activity
Os12g0632900	342	74	142	71	69	67	2.87	0.57	1.15	0.55	0.56	0.66	1.53	0.59	-1.37474	1.32831e-08	5.87011e-07	-	Serine/threonine protein kinase-related domain containing protein	-	-	-	-	GO:0005886//plasma membrane;GO:0016020//membrane;GO:0016021//integral component of membrane	GO:0001653//peptide receptor activity;GO:0004672//protein kinase activity;GO:0005515//protein binding;GO:0005524//ATP binding;GO:0017046//peptide hormone binding;GO:0042277//peptide binding;GO:0051428//peptide hormone receptor binding	GO:0006468//protein phosphorylation;GO:0010051//xylem and phloem pattern formation;GO:0010311//lateral root formation;GO:0031540//regulation of anthocyanin biosynthetic process;GO:0048831//regulation of shoot system development;GO:0090548//response to nitrate starvation;GO:1901141//regulation of lignin biosynthetic process;GO:1901333//positive regulation of lateral root development;GO:1902025//ni…
Os01g0821700	33	21	20	252	336	220	0.63	0.37	0.37	4.5	6.29	4.98	0.456667	5.25667	3.52493	1.39383e-08	6.13253e-07	-	Similar to Chitin-binding lectin 1 precursor (PL-I)	-	-	-	-	GO:0005739//mitochondrion;GO:0009706//chloroplast inner membrane;GO:0016020//membrane;GO:0016021//integral component of membrane	-	-
Os07g0173501	162	45	202	974	1242	831	6.77	1.72	8.16	37.48	50.05	40.46	5.55	42.6633	2.94244	1.40792e-08	6.1804e-07	-	Similar to 40S ribosomal protein S18	Genetic Information Processing	Translation	ko03010//Ribosome	K02964	GO:0005829//cytosol;GO:0005840//ribosome;GO:0015935//small ribosomal subunit	GO:0003676//nucleic acid binding;GO:0003723//RNA binding;GO:0003735//structural constituent of ribosome	GO:0006412//translation
Os01g0563000	23	10	74	434	750	502	0.54	0.13	1.46	8.06	14.29	11.76	0.71	11.37	4.00127	1.4109e-08	6.1804e-07	OsFKBP73	Hypothetical conserved gene	-	-	-	-	GO:0005737//cytoplasm	GO:0003755//peptidyl-prolyl cis-trans isomerase activity;GO:0005515//protein binding;GO:0016853//isomerase activity	GO:0000413//protein peptidyl-prolyl isomerization;GO:0061077//chaperone-mediated protein folding
Os10g0432200	0	0	0	93	162	38	0	0	0	0.78	1.42	0.4	0.001	0.866667	9.75933	1.47004e-08	6.38348e-07	-	Conserved hypothetical protein	-	-	-	-	GO:0000943//retrotransposon nucleocapsid	-	-
Os03g0805400	162	40	143	633	846	709	3.55	0.78	2.68	13.71	17.02	17.94	2.33667	16.2233	2.79555	1.55654e-08	6.74443e-07	-	Phosphatidic acid phosphatase type 2/haloperoxidase domain containing protein	-	-	-	-	GO:0005789//endoplasmic reticulum membrane;GO:0016020//membrane;GO:0016021//integral component of membrane	-	GO:0006665//sphingolipid metabolic process;GO:0009737//response to abscisic acid;GO:0090332//stomatal closure
Os05g0161500	6972	2970	2759	387	111	1312	100.39	39.25	38.43	5.13	1.54	22.02	59.3567	9.56333	-2.63382	1.5763e-08	6.80056e-07	-	RelA/SpoT domain containing protein	Metabolism;Metabolism	Global and overview maps;Nucleotide metabolism	ko01100//Metabolic pathways;ko00230//Purine metabolism	K00951;K00951	GO:0009507//chloroplast;GO:0009536//plastid	GO:0000166//nucleotide binding;GO:0005509//calcium ion binding;GO:0005524//ATP binding;GO:0005525//GTP binding;GO:0008728//GTP diphosphokinase activity;GO:0016301//kinase activity;GO:0016740//transferase activity	GO:0015969//guanosine tetraphosphate metabolic process;GO:0016310//phosphorylation
MSTRG.25061	9	3	10	138	171	92	0.12	0.04	0.13	1.76	2.29	1.49	0.0966667	1.84667	4.25576	1.6246e-08	6.9902e-07	LYK5	protein LYK5 [Oryza sativa Japonica Group]	-	-	-	-	-	GO:0016772//transferase activity, transferring phosphorus-containing groups;GO:0032550//purine ribonucleoside binding	GO:0006464//cellular protein modification process;GO:0006796//phosphate-containing compound metabolic process
Os01g0970900	5	6	8	139	224	97	0.07	0.08	0.1	1.67	2.82	1.53	0.0833333	2.00667	4.58976	1.62726e-08	6.9902e-07	-	Pentatricopeptide repeat domain containing protein	-	-	-	-	GO:0005739//mitochondrion	GO:0005515//protein binding	GO:0008380//RNA splicing
Os02g0657600	6	0	3	102	107	94	0.16	0	0.08	2.47	2.71	2.89	0.08	2.69	5.07146	1.64324e-08	7.03034e-07	OsNAGK2	N-acetyl glutamate kinase 2	Metabolism;Metabolism;Metabolism;Metabolism;Metabolism	Global and overview maps;Global and overview maps;Global and overview maps;Global and overview maps;Amino acid metabolism	ko01100//Metabolic pathways;ko01110//Biosynthesis of secondary metabolites;ko01230//Biosynthesis of amino acids;ko01210//2-Oxocarboxylic acid metabolism;ko00220//Arginine biosynthesis	K00930;K00930;K00930;K00930;K00930	GO:0005737//cytoplasm;GO:0009534//chloroplast thylakoid	GO:0003991//acetylglutamate kinase activity;GO:0016301//kinase activity;GO:0034618//arginine binding	GO:0006526//arginine biosynthetic process;GO:0016310//phosphorylation
Os11g0183900	38	9	54	387	296	359	0.7	0.18	1.14	7.38	5.59	8.45	0.673333	7.14	3.40653	1.64533e-08	7.03034e-07	OsAsp2	Similar to Aspartic proteinase Asp1 precursor (EC 3.4.23.-	-	-	-	-	-	GO:0004190//aspartic-type endopeptidase activity;GO:0008233//peptidase activity;GO:0016787//hydrolase activity	GO:0006508//proteolysis;GO:0030163//protein catabolic process
Os04g0402100	326	92	310	1281	2330	1393	4.7	1.22	4.33	17.03	32.45	23.43	3.41667	24.3033	2.83049	1.64716e-08	7.03034e-07	OsCNX	Similar to Calnexin (Fragment)	Genetic Information Processing;Cellular Processes	Folding, sorting and degradation;Transport and catabolism	ko04141//Protein processing in endoplasmic reticulum;ko04145//Phagosome	K08054;K08054	GO:0005783//endoplasmic reticulum;GO:0005789//endoplasmic reticulum membrane;GO:0016020//membrane;GO:0016021//integral component of membrane	GO:0005509//calcium ion binding;GO:0005515//protein binding;GO:0051082//unfolded protein binding	GO:0006457//protein folding;GO:0030968//endoplasmic reticulum unfolded protein response
Os05g0168500	518	253	544	2455	2277	1901	6.47	2.87	6.56	28.01	27.33	27.88	5.3	27.74	2.3879	1.71998e-08	7.32551e-07	-	Nonaspanin (TM9SF) family protein	-	-	-	-	GO:0005768//endosome;GO:0005794//Golgi apparatus;GO:0005802//trans-Golgi network;GO:0016020//membrane;GO:0016021//integral component of membrane	-	GO:0072657//protein localization to membrane
Os07g0192000	41	8	29	282	285	196	0.7	0.13	0.48	4.44	4.7	3.9	0.436667	4.34667	3.31531	1.73455e-08	7.37183e-07	-	ATPase, AAA-type, core domain containing protein	-	-	-	-	GO:0016020//membrane;GO:0016021//integral component of membrane	GO:0000166//nucleotide binding;GO:0005524//ATP binding	-
Os04g0430200	119	68	78	15	11	35	2.13	1.12	1.35	0.25	0.19	0.73	1.53333	0.39	-1.97513	1.82782e-08	7.75173e-07	-	PLC-like phosphodiesterase, TIM beta/alpha-barrel domain domain containing protein	-	-	-	-	-	GO:0008081//phosphoric diester hydrolase activity	GO:0006629//lipid metabolic process
Os05g0553400	15	0	23	263	356	203	0.35	0	0.52	5.7	8.08	5.57	0.29	6.45	4.47517	1.84589e-08	7.76244e-07	OsMYB55	Similar to Myb-related transcription factor-like protein (MYB transcription factor)	-	-	-	-	GO:0005634//nucleus	GO:0003677//DNA binding;GO:0003700//transcription factor activity, sequence-specific DNA binding;GO:0043565//sequence-specific DNA binding;GO:0044212//transcription regulatory region DNA binding	GO:0006355//regulation of transcription, DNA-templated;GO:0030154//cell differentiation
Os11g0475000	6	2	12	207	127	111	0.04	0.01	0.08	1.38	0.89	0.94	0.0433333	1.07	4.62599	1.90459e-08	7.99248e-07	-	Hypothetical protein	-	-	-	-	-	-	-
Os05g0557800	8	0	4	108	134	95	0.19	0	0.09	2.36	3.07	2.63	0.0933333	2.68667	4.84728	2.22185e-08	9.28484e-07	-	Similar to 50S ribosomal protein L21	Genetic Information Processing	Translation	ko03010//Ribosome	K02888	GO:0005739//mitochondrion;GO:0005840//ribosome	GO:0003723//RNA binding;GO:0003735//structural constituent of ribosome;GO:0043565//sequence-specific DNA binding;GO:0044212//transcription regulatory region DNA binding	GO:0000741//karyogamy;GO:0006412//translation;GO:0009553//embryo sac development;GO:0009555//pollen development;GO:0009567//double fertilization forming a zygote and endosperm;GO:0010197//polar nucleus fusion
Os05g0160200	11	2	23	184	208	194	0.44	0.07	0.9	6.85	8.11	9.13	0.47	8.03	4.09467	2.48286e-08	1.02895e-06	S27a	Ubiquitin	Genetic Information Processing	Translation	ko03010//Ribosome	K02977	GO:0005634//nucleus;GO:0005737//cytoplasm;GO:0005840//ribosome	GO:0003735//structural constituent of ribosome;GO:0005515//protein binding;GO:0031386//protein tag;GO:0031625//ubiquitin protein ligase binding;GO:0046872//metal ion binding	GO:0006412//translation;GO:0016567//protein ubiquitination;GO:0019941//modification-dependent protein catabolic process
Os02g0332200	157	54	188	774	889	743	2.24	0.71	2.6	10.18	12.25	12.36	1.85	11.5967	2.64811	2.53198e-08	1.04496e-06	-	Similar to T-complex protein 1 delta subunit	-	-	-	-	GO:0005737//cytoplasm;GO:0005832//chaperonin-containing T-complex	GO:0000166//nucleotide binding;GO:0005524//ATP binding;GO:0051082//unfolded protein binding	GO:0006457//protein folding
Os03g0297100	50	17	82	404	459	437	1.54	0.48	2.44	11.46	13.63	15.66	1.48667	13.5833	3.19168	2.58523e-08	1.06474e-06	RPS7a	40S ribosomal protein S7	Genetic Information Processing	Translation	ko03010//Ribosome	K02993	GO:0005840//ribosome;GO:0022627//cytosolic small ribosomal subunit;GO:0032040//small-subunit processome	GO:0003735//structural constituent of ribosome	GO:0006364//rRNA processing;GO:0006412//translation;GO:0042274//ribosomal small subunit biogenesis
Os11g0175400	0	0	0	136	186	21	0	0	0	1.6	2.3	0.31	0.001	1.40333	10.4546	2.60496e-08	1.07066e-06	OsNIN6	Plant neutral invertase family protein	-	-	-	-	GO:0005829//cytosol	GO:0003824//catalytic activity;GO:0004575//sucrose alpha-glucosidase activity;GO:0033926//glycopeptide alpha-N-acetylgalactosaminidase activity	GO:0005987//sucrose catabolic process
Os10g0114300	0	0	1	89	210	85	0	0	0.03	1.95	4.81	2.35	0.01	3.03667	8.24634	2.66701e-08	1.09167e-06	-	Similar to NADPH-dependent codeinone reductase (EC 1.1.1.247)	-	-	-	-	GO:0005829//cytosol	GO:0004032//alditol:NADP+ 1-oxidoreductase activity;GO:0008106//alcohol dehydrogenase (NADP+) activity;GO:0016491//oxidoreductase activity	GO:0055114//oxidation-reduction process
Os05g0524400	102	36	76	454	638	373	1.4	0.45	1.07	5.96	8.9	6.05	0.973333	6.97	2.84015	2.67945e-08	1.09452e-06	OsPFK05	Phosphofructokinase family protein	Metabolism;Metabolism;Metabolism;Metabolism;Metabolism;Genetic Information Processing;Metabolism;Metabolism;Metabolism	Global and overview maps;Global and overview maps;Global and overview maps;Global and overview maps;Carbohydrate metabolism;Folding, sorting and degradation;Carbohydrate metabolism;Carbohydrate metabolism;Carbohydrate metabolism	ko01100//Metabolic pathways;ko01110//Biosynthesis of secondary metabolites;ko01200//Carbon metabolism;ko01230//Biosynthesis of amino acids;ko00010//Glycolysis / Gluconeogenesis;ko03018//RNA degradation;ko00051//Fructose and mannose metabolism;ko00052//Galactose metabolism;ko00030//Pentose phosphate pathway	K00850;K00850;K00850;K00850;K00850;K00850;K00850;K00850;K00850	GO:0005737//cytoplasm	GO:0000166//nucleotide binding;GO:0003824//catalytic activity;GO:0003872//6-phosphofructokinase activity;GO:0005524//ATP binding;GO:0016301//kinase activity;GO:0016740//transferase activity;GO:0046872//metal ion binding	GO:0006002//fructose 6-phosphate metabolic process;GO:0006096//glycolytic process;GO:0008152//metabolic process;GO:0016310//phosphorylation;GO:0061615//glycolytic process through fructose-6-phosphate
Os02g0643800	0	0	0	90	68	59	0	0	0	2.53	2.01	2.1	0.001	2.21333	11.112	2.70328e-08	1.102e-06	OsSAUR11	Auxin responsive SAUR protein family protein	Environmental Information Processing	Signal transduction	ko04075//Plant hormone signal transduction	K14488	-	-	GO:0009733//response to auxin
Os07g0162100	925	259	392	224	92	224	32.54	8.36	13.34	7.26	3.12	9.19	18.08	6.52333	-1.47071	2.80187e-08	1.13986e-06	-	3-oxo-5-alpha-steroid 4-dehydrogenase, C-terminal domain containing protein	Metabolism;Metabolism;Metabolism;Metabolism;Metabolism	Global and overview maps;Global and overview maps;Global and overview maps;Lipid metabolism;Lipid metabolism	ko01100//Metabolic pathways;ko01110//Biosynthesis of secondary metabolites;ko01212//Fatty acid metabolism;ko00062//Fatty acid elongation;ko01040//Biosynthesis of unsaturated fatty acids	K10258;K10258;K10258;K10258;K10258	GO:0005737//cytoplasm;GO:0016021//integral component of membrane	GO:0016491//oxidoreductase activity;GO:0016627//oxidoreductase activity, acting on the CH-CH group of donors	GO:0006629//lipid metabolic process;GO:0055114//oxidation-reduction process
Os04g0179700	0	0	0	124	33	112	0	0	0	1.23	0.34	1.41	0.001	0.993333	9.95613	2.91385e-08	1.17584e-06	OsKS4	9-beta-pimara-7,15-diene synthase, Momilactone phytoalexins biosynthesis, Defense respons	Metabolism;Metabolism	Global and overview maps;Metabolism of terpenoids and polyketides	ko01110//Biosynthesis of secondary metabolites;ko00904//Diterpenoid biosynthesis	K14046;K14046	-	GO:0000287//magnesium ion binding;GO:0010333//terpene synthase activity;GO:0016829//lyase activity;GO:0034279//syn-pimara-7,15-diene synthase activity;GO:0046872//metal ion binding	GO:0006952//defense response;GO:0016102//diterpenoid biosynthetic process
Os03g0172000	71	39	111	515	674	475	0.57	0.35	0.91	3.93	5.4	4.71	0.61	4.68	2.93963	2.95185e-08	1.18638e-06	MOS3/SAR3	Peptidase S59, nucleoporin family protein	Genetic Information Processing	Translation	ko03013//RNA transport	K14297	GO:0005634//nucleus;GO:0005635//nuclear envelope;GO:0005643//nuclear pore;GO:0031965//nuclear membrane;GO:0044614//nuclear pore cytoplasmic filaments	GO:0003723//RNA binding;GO:0008139//nuclear localization sequence binding;GO:0017056//structural constituent of nuclear pore	GO:0000973//posttranscriptional tethering of RNA polymerase II gene DNA at nuclear periphery;GO:0006405//RNA export from nucleus;GO:0006606//protein import into nucleus;GO:0006913//nucleocytoplasmic transport;GO:0009733//response to auxin;GO:0009870//defense response signaling pathway, resistance gene-dependent;GO:0034398//telomere tethering at nuclear periphery
Os03g0719100	2	0	0	113	95	100	0.02	0	0	0.98	0.86	1.09	0.00666667	0.976667	7.19476	3.07451e-08	1.23073e-06	SIZ2	SUMO (small ubiquitin-related modifier) E3-ligase, Abiotic stress response, Stress adaptatio	-	-	-	-	GO:0005634//nucleus	GO:0008270//zinc ion binding;GO:0016740//transferase activity;GO:0046872//metal ion binding;GO:0061665//SUMO ligase activity	GO:0016925//protein sumoylation
Os08g0460600	326	79	259	122	92	97	5.68	1.27	4.36	1.95	1.55	1.97	3.77	1.82333	-1.04799	3.1314e-08	1.2485e-06	OsCKX11	Similar to Cytokinin dehydrogenase 11	Metabolism	Metabolism of terpenoids and polyketides	ko00908//Zeatin biosynthesis	K00279	-	GO:0003824//catalytic activity;GO:0019139//cytokinin dehydrogenase activity;GO:0050660//flavin adenine dinucleotide binding	GO:0009690//cytokinin metabolic process;GO:0055114//oxidation-reduction process
Os12g0434400	2	2	11	211	83	239	0.04	0.03	0.19	3.55	1.46	5.09	0.0866667	3.36667	5.2797	3.18812e-08	1.26858e-06	-	Similar to predicted protein	Metabolism;Metabolism	Global and overview maps;Metabolism of other amino acids	ko01100//Metabolic pathways;ko00480//Glutathione metabolism	K01255;K01255	GO:0005737//cytoplasm	GO:0004177//aminopeptidase activity;GO:0008235//metalloexopeptidase activity;GO:0030145//manganese ion binding	GO:0006508//proteolysis;GO:0019538//protein metabolic process
Os04g0504800	198	62	196	957	1046	714	4.1	1.32	3.54	18.5	21.9	17.51	2.98667	19.3033	2.69224	3.22227e-08	1.27648e-06	OsPABPC3	Similar to Poly(A)-binding protein	Genetic Information Processing;Genetic Information Processing;Genetic Information Processing	Translation;Folding, sorting and degradation;Translation	ko03013//RNA transport;ko03018//RNA degradation;ko03015//mRNA surveillance pathway	K13126;K13126;K13126	GO:0005634//nucleus;GO:0005737//cytoplasm;GO:0005829//cytosol;GO:1990904//ribonucleoprotein complex	GO:0003676//nucleic acid binding;GO:0003723//RNA binding;GO:0003730//mRNA 3'-UTR binding;GO:0008143//poly(A) binding;GO:0008266//poly(U) RNA binding	-
Os03g0694900	140	45	131	545	625	563	1.16	0.34	1.05	4.16	4.99	5.43	0.85	4.86	2.51542	3.25508e-08	1.28498e-06	OsValRS1	Similar to Valyl-tRNA synthetase (EC 6.1.1.9) (Valine--tRNA ligase) (ValRS)	Genetic Information Processing	Translation	ko00970//Aminoacyl-tRNA biosynthesis	K01873	GO:0005737//cytoplasm;GO:0005829//cytosol	GO:0000166//nucleotide binding;GO:0002161//aminoacyl-tRNA editing activity;GO:0004812//aminoacyl-tRNA ligase activity;GO:0004832//valine-tRNA ligase activity;GO:0005524//ATP binding;GO:0016874//ligase activity	GO:0006412//translation;GO:0006418//tRNA aminoacylation for protein translation;GO:0006438//valyl-tRNA aminoacylation
Os01g0794800	7	1	15	273	117	165	0.12	0.02	0.18	3.24	1.56	2.4	0.106667	2.4	4.49185	3.41212e-08	1.34177e-06	-	Similar to Subtilase	-	-	-	-	GO:0005615//extracellular space	GO:0004252//serine-type endopeptidase activity;GO:0008233//peptidase activity;GO:0008236//serine-type peptidase activity;GO:0016787//hydrolase activity	GO:0006508//proteolysis
Os02g0115700	3352	1046	4274	14139	21953	19476	53.17	20.68	71.21	210.53	352.98	367.84	48.3533	310.45	2.68267	3.41235e-08	1.34177e-06	CATA1	Catalase isozyme A (EC 1.11.1.6) (CAT-A)	Metabolism;Metabolism;Metabolism;Environmental Information Processing;Cellular Processes;Metabolism;Metabolism	Global and overview maps;Global and overview maps;Global and overview maps;Signal transduction;Transport and catabolism;Carbohydrate metabolism;Amino acid metabolism	ko01100//Metabolic pathways;ko01110//Biosynthesis of secondary metabolites;ko01200//Carbon metabolism;ko04016//MAPK signaling pathway - plant;ko04146//Peroxisome;ko00630//Glyoxylate and dicarboxylate metabolism;ko00380//Tryptophan metabolism	K03781;K03781;K03781;K03781;K03781;K03781;K03781	GO:0005737//cytoplasm;GO:0005886//plasma membrane;GO:0016020//membrane	GO:0004096//catalase activity;GO:0004601//peroxidase activity;GO:0005515//protein binding;GO:0016491//oxidoreductase activity;GO:0020037//heme binding;GO:0046872//metal ion binding	GO:0006979//response to oxidative stress;GO:0007623//circadian rhythm;GO:0009408//response to heat;GO:0009414//response to water deprivation;GO:0009416//response to light stimulus;GO:0009617//response to bacterium;GO:0009737//response to abscisic acid;GO:0042542//response to hydrogen peroxide;GO:0042744//hydrogen peroxide catabolic process;GO:0055114//oxidation-reduction process;GO:0098869//cellu…
Os08g0190100	0	0	2	95	227	69	0	0	0.06	2.78	6.97	2.56	0.02	4.10333	7.68065	3.59115e-08	1.4093e-06	GLP8-11	Germin-like protein 8-11, Disease resistanc	-	-	-	-	GO:0005576//extracellular region;GO:0005618//cell wall;GO:0048046//apoplast	GO:0030145//manganese ion binding;GO:0045735//nutrient reservoir activity;GO:0046872//metal ion binding	-
Os01g0191100	23	8	23	135	242	211	0.99	0.31	0.95	5.33	10.01	10.54	0.75	8.62667	3.52384	3.64479e-08	1.42754e-06	-	Similar to Acidic ribosomal protein P2a-4 (Fragment)	Genetic Information Processing	Translation	ko03010//Ribosome	K02943	GO:0005840//ribosome	GO:0003735//structural constituent of ribosome	GO:0006414//translational elongation
Os04g0605500	1408	622	926	319	224	655	12.65	4.73	7.66	2.55	2.03	6.7	8.34667	3.76	-1.15047	3.87804e-08	1.51297e-06	ACA11	P-type IIB Ca(2+) ATPase, Stress toleranc	-	-	-	-	GO:0005886//plasma membrane;GO:0005887//integral component of plasma membrane;GO:0016020//membrane;GO:0016021//integral component of membrane;GO:0043231//intracellular membrane-bounded organelle	GO:0000166//nucleotide binding;GO:0005388//calcium-transporting ATPase activity;GO:0005515//protein binding;GO:0005516//calmodulin binding;GO:0005524//ATP binding;GO:0019829//cation-transporting ATPase activity;GO:0046872//metal ion binding	GO:0006811//ion transport;GO:0006816//calcium ion transport;GO:0009409//response to cold;GO:0009414//response to water deprivation;GO:0070588//calcium ion transmembrane transport
Os01g0670100	2	0	14	154	293	165	0.02	0	0.15	1.57	3.12	2.12	0.0566667	2.27	5.32405	3.93903e-08	1.53038e-06	-	Serine/threonine protein kinase-related domain containing protein	-	-	-	-	GO:0005886//plasma membrane;GO:0016021//integral component of membrane	GO:0000166//nucleotide binding;GO:0004672//protein kinase activity;GO:0004674//protein serine/threonine kinase activity;GO:0005524//ATP binding;GO:0016301//kinase activity;GO:0016740//transferase activity	GO:0006468//protein phosphorylation;GO:0016310//phosphorylation;GO:0048544//recognition of pollen
MSTRG.23714	21	15	22	159	323	213	0.64	0.41	0.67	2.24	7.24	3.66	0.573333	4.38	2.93348	3.95343e-08	1.53038e-06	--	hypothetical protein OsI_22053 [Oryza sativa Indica Group]	-	-	-	-	-	-	-
Os11g0634500	30	16	51	287	358	253	1.8	0.88	2.96	15.86	20.73	17.69	1.88	18.0933	3.26665	3.98563e-08	1.53693e-06	-	40S ribosomal protein S29	Genetic Information Processing	Translation	ko03010//Ribosome	K02980	GO:0005840//ribosome;GO:0022627//cytosolic small ribosomal subunit	GO:0003735//structural constituent of ribosome;GO:0008270//zinc ion binding	GO:0006412//translation
Os03g0655700	71	24	93	403	564	426	1.69	0.75	2.63	11.46	16.08	14.08	1.69	13.8733	3.03722	4.024e-08	1.54628e-06	-	Similar to 3-isopropylmalate dehydrogenase 2	Metabolism;Metabolism;Metabolism;Metabolism;Metabolism;Metabolism	Global and overview maps;Global and overview maps;Global and overview maps;Global and overview maps;Amino acid metabolism;Carbohydrate metabolism	ko01100//Metabolic pathways;ko01110//Biosynthesis of secondary metabolites;ko01230//Biosynthesis of amino acids;ko01210//2-Oxocarboxylic acid metabolism;ko00290//Valine, leucine and isoleucine biosynthesis;ko00660//C5-Branched dibasic acid metabolism	K00052;K00052;K00052;K00052;K00052;K00052	GO:0005737//cytoplasm	GO:0000287//magnesium ion binding;GO:0003862//3-isopropylmalate dehydrogenase activity;GO:0016616//oxidoreductase activity, acting on the CH-OH group of donors, NAD or NADP as acceptor;GO:0046872//metal ion binding;GO:0051287//NAD binding	GO:0009082//branched-chain amino acid biosynthetic process;GO:0009098//leucine biosynthetic process;GO:0055114//oxidation-reduction process
Os01g0730500	1221	388	675	362	209	475	25.46	7.43	13.62	6.95	4.2	11.54	15.5033	7.56333	-1.03548	4.02825e-08	1.54628e-06	OsDjC13	Similar to Ferredoxin (Bacterial type ferredoxin family)	-	-	-	-	-	GO:0005506//iron ion binding;GO:0009055//electron carrier activity	GO:0022900//electron transport chain
Os02g0284600	37	10	39	250	428	211	1.6	0.4	1.63	9.94	17.83	10.61	1.21	12.7933	3.40231	4.03311e-08	1.54628e-06	OsRPL27.3	Similar to 60S ribosomal protein L27	Genetic Information Processing	Translation	ko03010//Ribosome	K02901	GO:0005840//ribosome;GO:0022625//cytosolic large ribosomal subunit	GO:0003735//structural constituent of ribosome	GO:0006412//translation
Os04g0541700	117	85	102	45	28	44	3.84	2.55	3.21	1.25	0.77	1.68	3.2	1.23333	-1.37551	4.04842e-08	1.54918e-06	HOX22	Similar to Homeobox-leucine zipper protein HOX22	-	-	-	-	GO:0005634//nucleus	GO:0003677//DNA binding;GO:0003700//transcription factor activity, sequence-specific DNA binding;GO:0043565//sequence-specific DNA binding	GO:0006355//regulation of transcription, DNA-templated;GO:0045893//positive regulation of transcription, DNA-templated
Os03g0324600	7	25	19	485	578	304	0.05	0.17	0.14	3.35	4.19	2.66	0.12	3.4	4.82443	4.08677e-08	1.56086e-06	-	NB-ARC domain containing protein	-	-	-	-	-	GO:0000166//nucleotide binding;GO:0005524//ATP binding;GO:0043531//ADP binding	GO:0006952//defense response
Os07g0689600	72	19	28	4	0	3	1.42	0.34	0.53	0.07	0	0.07	0.763333	0.0466667	-4.03185	4.29907e-08	1.6357e-06	OsNAS3	Nicotianamine synthase 3 (EC 2.5.1.43) (S-adenosyl-L-methionine:S- adenosyl-L-methionine:S-adenosyl-methionine 3-amino-3- carboxypropyltransferase 3	-	-	-	-	-	GO:0016740//transferase activity;GO:0030410//nicotianamine synthase activity	GO:0030418//nicotianamine biosynthetic process
Os02g0822900	1	0	8	124	136	112	0.01	0	0.07	1.1	1.27	1.26	0.0266667	1.21	5.50383	4.45822e-08	1.68661e-06	OsPUB62	Hypothetical conserved gene	-	-	-	-	-	GO:0004672//protein kinase activity;GO:0004842//ubiquitin-protein transferase activity;GO:0005524//ATP binding	GO:0006468//protein phosphorylation;GO:0016567//protein ubiquitination
Os01g0687400	28	5	101	801	909	872	0.7	0.11	2.45	18.47	21.97	25.45	1.08667	21.9633	4.33712	4.49189e-08	1.69613e-06	-	Similar to Chitinase (EC 3.2.1.14)	Metabolism;Metabolism	Global and overview maps;Carbohydrate metabolism	ko01100//Metabolic pathways;ko00520//Amino sugar and nucleotide sugar metabolism	K01183;K01183	GO:0005576//extracellular region	GO:0004553//hydrolase activity, hydrolyzing O-glycosyl compounds;GO:0004568//chitinase activity;GO:0016787//hydrolase activity;GO:0016798//hydrolase activity, acting on glycosyl bonds	GO:0005975//carbohydrate metabolic process;GO:0008152//metabolic process
Os07g0132500	2	0	8	110	164	95	0.06	0	0.21	2.81	4.39	3.07	0.09	3.42333	5.24933	4.76804e-08	1.79363e-06	-	Similar to Resistance protein candidate (Fragment)	-	-	-	-	GO:0005886//plasma membrane	GO:0004672//protein kinase activity;GO:0004675//transmembrane receptor protein serine/threonine kinase activity;GO:0005524//ATP binding	GO:0002229//defense response to oomycetes;GO:0006468//protein phosphorylation;GO:0006952//defense response;GO:0007178//transmembrane receptor protein serine/threonine kinase signaling pathway;GO:0042742//defense response to bacterium
Os12g0481100	23	23	17	281	380	217	0.25	0.23	0.18	2.86	4.06	2.8	0.22	3.24	3.88042	4.89856e-08	1.83926e-06	OsRH28	Similar to cDNA clone:J033010C22, full insert sequence	-	-	-	-	GO:0005730//nucleolus	GO:0000166//nucleotide binding;GO:0003676//nucleic acid binding;GO:0003723//RNA binding;GO:0003724//RNA helicase activity;GO:0004386//helicase activity;GO:0005524//ATP binding;GO:0016787//hydrolase activity	-
Os02g0187800	145	68	77	810	567	779	3.09	1.33	1.74	15.9	11.71	20.67	2.05333	16.0933	2.97042	4.93876e-08	1.85088e-06	GH2	Cinnamyl-alcohol dehydrogenase, Lignin biosynthesis, Monolignol biosynthesi	Metabolism;Metabolism;Metabolism	Global and overview maps;Global and overview maps;Biosynthesis of other secondary metabolites	ko01100//Metabolic pathways;ko01110//Biosynthesis of secondary metabolites;ko00940//Phenylpropanoid biosynthesis	K00083;K00083;K00083	-	GO:0008270//zinc ion binding;GO:0016491//oxidoreductase activity;GO:0016616//oxidoreductase activity, acting on the CH-OH group of donors, NAD or NADP as acceptor;GO:0045551//cinnamyl-alcohol dehydrogenase activity;GO:0046872//metal ion binding;GO:0052747//sinapyl alcohol dehydrogenase activity	GO:0009699//phenylpropanoid biosynthetic process;GO:0009809//lignin biosynthetic process;GO:0055114//oxidation-reduction process
Os10g0554001	66	27	30	4	6	9	1.1	0.41	0.48	0.06	0.1	0.18	0.663333	0.113333	-2.54916	5.00082e-08	1.86713e-06	-	Conserved hypothetical protein	-	-	-	-	-	-	-
Os05g0278500	19	0	41	631	345	533	0.36	0	0.76	11.13	6.38	11.89	0.373333	9.8	4.71425	5.03818e-08	1.87757e-06	OsAT5	Transferase family protein	-	-	-	-	-	GO:0016410//N-acyltransferase activity;GO:0016740//transferase activity;GO:0016746//transferase activity, transferring acyl groups;GO:0016747//transferase activity, transferring acyl groups other than amino-acyl groups	-
Os08g0124500	5	0	2	128	91	74	0.06	0	0.02	1.46	1.07	1.05	0.0266667	1.19333	5.48382	5.10353e-08	1.89838e-06	-	Similar to Resistance protein candidate (Fragment)	-	-	-	-	GO:0005886//plasma membrane;GO:0016020//membrane;GO:0016021//integral component of membrane	GO:0004672//protein kinase activity;GO:0004675//transmembrane receptor protein serine/threonine kinase activity;GO:0005524//ATP binding;GO:0030246//carbohydrate binding	GO:0002229//defense response to oomycetes;GO:0006468//protein phosphorylation;GO:0006952//defense response;GO:0007178//transmembrane receptor protein serine/threonine kinase signaling pathway;GO:0042742//defense response to bacterium
Os12g0231000	1475	436	784	340	180	520	19.21	5.21	9.88	4.08	2.26	7.89	11.4333	4.74333	-1.26927	5.12508e-08	1.90285e-06	OsPTR3	TGF-beta receptor, type I/II extracellular region family protein	-	-	-	-	GO:0016020//membrane;GO:0016021//integral component of membrane	GO:0015333//peptide:proton symporter activity;GO:0022857//transmembrane transporter activity;GO:0035673//oligopeptide transmembrane transporter activity;GO:1904680//peptide transmembrane transporter activity	GO:0035672//oligopeptide transmembrane transport;GO:0042886//amide transport;GO:0055085//transmembrane transport;GO:1902600//hydrogen ion transmembrane transport
Os02g0275200	157	26	181	1024	1359	881	2.36	0.36	2.93	14.89	21.47	15.55	1.88333	17.3033	3.19969	5.32227e-08	1.9724e-06	-	Xyloglucan fucosyltransferase family protein	-	-	-	-	GO:0005794//Golgi apparatus;GO:0016020//membrane	GO:0008107//galactoside 2-alpha-L-fucosyltransferase activity;GO:0008417//fucosyltransferase activity	GO:0009969//xyloglucan biosynthetic process;GO:0036065//fucosylation;GO:0042546//cell wall biogenesis;GO:0071555//cell wall organization
Os03g0665200	104	40	87	11	27	30	2.36	0.83	1.91	0.23	0.59	0.79	1.7	0.536667	-1.66344	5.41791e-08	2.00412e-06	-	Protein of unknown function DUF581 family protein	-	-	-	-	-	-	-
Os10g0470700	115	28	119	536	574	689	1.62	0.36	1.62	6.96	7.82	11.33	1.2	8.70333	2.85853	5.4352e-08	2.00681e-06	OsPTR3	Similar to Peptide transporter	-	-	-	-	GO:0016020//membrane;GO:0016021//integral component of membrane	GO:0015333//peptide:proton symporter activity;GO:0022857//transmembrane transporter activity;GO:0035673//oligopeptide transmembrane transporter activity;GO:1904680//peptide transmembrane transporter activity	GO:0035672//oligopeptide transmembrane transport;GO:0042886//amide transport;GO:0055085//transmembrane transport;GO:1902600//hydrogen ion transmembrane transport
Os06g0118700	142	57	60	26	10	26	2.29	0.84	0.94	0.39	0.16	0.49	1.35667	0.346667	-1.96845	5.54022e-08	2.04181e-06	-	Peptidase A1 domain containing protein	-	-	-	-	-	GO:0003677//DNA binding;GO:0004190//aspartic-type endopeptidase activity	GO:0006508//proteolysis;GO:0030163//protein catabolic process
Os03g0111800	5	8	9	125	232	124	0.03	0.04	0.05	0.7	1.37	0.88	0.04	0.983333	4.61961	5.65065e-08	2.07104e-06	-	WD40/YVTN repeat-like domain containing protein	-	-	-	-	-	GO:0005515//protein binding	-
Os10g0530500	374	550	357	91	67	200	13.16	17.76	12.15	2.95	2.28	8.2	14.3567	4.47667	-1.68122	5.7809e-08	2.1149e-06	OsGSTU13	Similar to Glutathione-S-transferase Cla47	Metabolism;Metabolism	Global and overview maps;Metabolism of other amino acids	ko01100//Metabolic pathways;ko00480//Glutathione metabolism	K00799;K00799	GO:0005737//cytoplasm	GO:0004364//glutathione transferase activity	GO:0006749//glutathione metabolic process
Os07g0191000	13	2	12	138	173	104	0.26	0.04	0.23	2.5	3.29	2.39	0.176667	2.72667	3.94804	5.82452e-08	2.12696e-06	-	Inositol monophosphatase family protein	Metabolism;Metabolism;Metabolism;Environmental Information Processing;Metabolism;Metabolism;Metabolism	Global and overview maps;Global and overview maps;Global and overview maps;Signal transduction;Carbohydrate metabolism;Carbohydrate metabolism;Amino acid metabolism	ko01100//Metabolic pathways;ko01110//Biosynthesis of secondary metabolites;ko01230//Biosynthesis of amino acids;ko04070//Phosphatidylinositol signaling system;ko00562//Inositol phosphate metabolism;ko00053//Ascorbate and aldarate metabolism;ko00340//Histidine metabolism	K18649;K18649;K18649;K18649;K18649;K18649;K18649	-	GO:0004401//histidinol-phosphatase activity;GO:0042578//phosphoric ester hydrolase activity	GO:0016311//dephosphorylation;GO:0046854//phosphatidylinositol phosphorylation
Os04g0227500	163	58	175	961	685	756	4.45	1.45	4.62	24.16	18.05	24.05	3.50667	22.0867	2.655	5.91502e-08	2.15607e-06	-	DSBA oxidoreductase family protein	-	-	-	-	-	-	-
Os05g0430200	4	0	5	77	166	82	0.1	0	0.12	1.48	3.57	2.25	0.0733333	2.43333	5.05232	6.63828e-08	2.40217e-06	-	Similar to ATP binding protein	-	-	-	-	GO:0005737//cytoplasm	GO:0019136//deoxynucleoside kinase activity	GO:0009157//deoxyribonucleoside monophosphate biosynthetic process
Os08g0532200	196	81	351	1452	1997	1363	3.39	1.28	5.89	23.17	33.63	27.65	3.52	28.15	2.99949	6.68708e-08	2.41238e-06	GSA	Similar to Glutamate-1-semialdehyde 2,1-aminomutase, chloroplast precursor (EC 5.4.3.8) (GSA) (Glutamate-1-semialdehyde aminotransferase) (GSA- AT)	Metabolism;Metabolism;Metabolism	Global and overview maps;Global and overview maps;Metabolism of cofactors and vitamins	ko01100//Metabolic pathways;ko01110//Biosynthesis of secondary metabolites;ko00860//Porphyrin and chlorophyll metabolism	K01845;K01845;K01845	GO:0009507//chloroplast;GO:0009536//plastid	GO:0003824//catalytic activity;GO:0008483//transaminase activity;GO:0016853//isomerase activity;GO:0030170//pyridoxal phosphate binding;GO:0042286//glutamate-1-semialdehyde 2,1-aminomutase activity	GO:0006779//porphyrin-containing compound biosynthetic process;GO:0006782//protoporphyrinogen IX biosynthetic process;GO:0015995//chlorophyll biosynthetic process;GO:0033014//tetrapyrrole biosynthetic process
Os02g0532300	12	0	14	166	133	227	0.25	0	0.29	3.22	2.71	5.69	0.18	3.87333	4.42751	6.69065e-08	2.41238e-06	-	Hypothetical conserved gene	-	-	-	-	GO:0016021//integral component of membrane	GO:0016787//hydrolase activity	-
Os05g0168300	706	134	463	200	148	222	16.21	2.82	10.29	4.23	3.28	5.94	9.77333	4.48333	-1.12428	6.90579e-08	2.4721e-06	-	Haloacid dehalogenase-like hydrolase domain containing protein	-	-	-	-	-	-	-
Os02g0205500	26	2	6	134	267	246	0.41	0.03	0.09	1.91	3.97	4.41	0.176667	3.43	4.27911	7.18608e-08	2.56784e-06	-	Similar to Fatty acid elongase 1	Metabolism;Metabolism;Organismal Systems;Metabolism	Global and overview maps;Global and overview maps;Environmental adaptation;Lipid metabolism	ko01100//Metabolic pathways;ko01110//Biosynthesis of secondary metabolites;ko04626//Plant-pathogen interaction;ko00062//Fatty acid elongation	K15397;K15397;K15397;K15397	GO:0016020//membrane;GO:0016021//integral component of membrane	GO:0003824//catalytic activity;GO:0016740//transferase activity;GO:0016746//transferase activity, transferring acyl groups;GO:0016747//transferase activity, transferring acyl groups other than amino-acyl groups	GO:0006633//fatty acid biosynthetic process
Os02g0194700	49358	16266	19437	3033	740	9452	554.74	162.01	211.12	31.46	7.97	123.41	309.29	54.28	-2.51047	7.22384e-08	2.57672e-06	OsLOX1	Similar to Lipoxygenase 2.3, chloroplast precursor (EC 1.13.11.12) (LOX2:Hv:3)	Metabolism;Metabolism;Metabolism;Metabolism	Global and overview maps;Global and overview maps;Lipid metabolism;Lipid metabolism	ko01100//Metabolic pathways;ko01110//Biosynthesis of secondary metabolites;ko00592//alpha-Linolenic acid metabolism;ko00591//Linoleic acid metabolism	K00454;K00454;K00454;K00454	-	GO:0005515//protein binding;GO:0016491//oxidoreductase activity;GO:0016702//oxidoreductase activity, acting on single donors with incorporation of molecular oxygen, incorporation of two atoms of oxygen;GO:0046872//metal ion binding;GO:0051213//dioxygenase activity	GO:0006633//fatty acid biosynthetic process;GO:0031408//oxylipin biosynthetic process;GO:0034440//lipid oxidation;GO:0055114//oxidation-reduction process
Os09g0571200	25	11	63	378	627	302	0.75	0.3	1.83	10.43	18.14	10.55	0.96	13.04	3.76377	7.29194e-08	2.59588e-06	-	C2 domain containing protein	-	-	-	-	GO:0016020//membrane;GO:0016021//integral component of membrane	-	-
Os03g0798600	118	10	112	714	1040	984	4.64	0.36	4.26	25.86	39.49	45.11	3.08667	36.82	3.57637	7.32972e-08	2.60055e-06	-	Similar to 40S ribosomal protein S15 (Fragment)	Genetic Information Processing	Translation	ko03010//Ribosome	K02958	GO:0005840//ribosome;GO:0015935//small ribosomal subunit;GO:0022627//cytosolic small ribosomal subunit	GO:0003723//RNA binding;GO:0003735//structural constituent of ribosome	GO:0000028//ribosomal small subunit assembly;GO:0006412//translation
Os04g0556600	919	370	413	275	176	348	16.46	6.08	7.16	4.54	3.04	7.26	9.9	4.94667	-1.00097	7.64582e-08	2.70789e-06	CZOGT2	cis-Zeatin-O-glucosyltransferase, Catalyze O-glucosylation of cZ and cZ-ribosid	Metabolism	Metabolism of terpenoids and polyketides	ko00908//Zeatin biosynthesis	K13495	GO:0043231//intracellular membrane-bounded organelle	GO:0008194//UDP-glycosyltransferase activity;GO:0016740//transferase activity;GO:0016757//transferase activity, transferring glycosyl groups;GO:0016758//transferase activity, transferring hexosyl groups	-
Os11g0514500	4	0	11	153	88	313	0.12	0	0.32	4.21	2.54	10.91	0.146667	5.88667	5.32684	7.85663e-08	2.77763e-06	-	Sorghum bicolor leucine-rich repeat-containing extracellular glycoprotein precursor	-	-	-	-	GO:0005886//plasma membrane	GO:0016301//kinase activity	GO:0016310//phosphorylation
Os07g0691200	5510	3002	4429	1651	818	2829	54.29	27.43	42.27	14.76	7.93	31.99	41.33	18.2267	-1.18114	8.29274e-08	2.92663e-06	-	Similar to D-alanine--D-alanine ligase B (EC 6.3.2.4) (D-alanylalanine synthetase B) (D-Ala-D-Ala ligase B)	-	-	-	-	GO:0009507//chloroplast	GO:0000166//nucleotide binding;GO:0005524//ATP binding;GO:0008716//D-alanine-D-alanine ligase activity;GO:0046872//metal ion binding	GO:0009252//peptidoglycan biosynthetic process
Os03g0406200	29	9	42	260	276	212	0.89	0.26	1.25	7.32	8.15	7.56	0.8	7.67667	3.26241	8.42819e-08	2.96919e-06	eEF-1beta2	Elongation factor 1 beta 2	-	-	-	-	GO:0005829//cytosol;GO:0005853//eukaryotic translation elongation factor 1 complex	GO:0003746//translation elongation factor activity;GO:0005085//guanyl-nucleotide exchange factor activity	GO:0006412//translation;GO:0006414//translational elongation
MSTRG.28585	8	2	14	150	200	95	0.15	0.03	0.25	2.56	3.57	2.05	0.143333	2.72667	4.24969	8.55265e-08	3.00245e-06	PIK6-NP	disease resistance protein RGA5-like isoform X2 [Oryza sativa Japonica Group]	-	-	-	-	-	-	-
Os02g0782600	745	418	590	227	146	404	15.87	8.44	12.07	4.63	3.06	10.14	12.1267	5.94333	-1.02884	8.68299e-08	3.03871e-06	-	Synaptojanin, N-terminal domain containing protein	Metabolism;Metabolism	Global and overview maps;Carbohydrate metabolism	ko01100//Metabolic pathways;ko00562//Inositol phosphate metabolism	K22913;K22913	-	GO:0008233//peptidase activity;GO:0042578//phosphoric ester hydrolase activity	-
Os10g0528900	20	37	36	0	0	1	0.52	0.89	0.91	0	0	0.03	0.773333	0.01	-6.27302	8.68638e-08	3.03871e-06	OsGSTU14	Similar to Tau class GST protein 3	Metabolism;Metabolism	Global and overview maps;Metabolism of other amino acids	ko01100//Metabolic pathways;ko00480//Glutathione metabolism	K00799;K00799	GO:0005737//cytoplasm	GO:0004364//glutathione transferase activity;GO:0005515//protein binding;GO:0016740//transferase activity	GO:0006749//glutathione metabolic process
Os12g0199800	0	0	1	181	18	369	0	0	0.01	2.21	0.23	5.69	0.00333333	2.71	9.66711	8.71885e-08	3.04474e-06	CYP76M13	Similar to Cyt-P450 monooxygenase	-	-	-	-	GO:0016020//membrane	GO:0005506//iron ion binding;GO:0016705//oxidoreductase activity, acting on paired donors, with incorporation or reduction of molecular oxygen;GO:0016709//oxidoreductase activity, acting on paired donors, with incorporation or reduction of molecular oxygen, NAD(P)H as one donor, and incorporation of one atom of oxygen;GO:0020037//heme binding	GO:0016102//diterpenoid biosynthetic process;GO:0055114//oxidation-reduction process
Os08g0187900	117	86	115	40	27	55	3.97	2.68	3.77	1.25	0.88	2.17	3.47333	1.43333	-1.27695	8.82216e-08	3.07544e-06	-	Ubiquitin-conjugating enzyme, E2 domain containing protein	-	-	-	-	-	-	-
Os02g0636300	10	4	8	140	109	95	0.14	0.05	0.1	1.74	1.42	1.5	0.0966667	1.55333	4.00621	8.89138e-08	3.09417e-06	OsRH47A	DEAD-like helicase, N-terminal domain containing protein	-	-	-	-	-	GO:0000166//nucleotide binding;GO:0003676//nucleic acid binding;GO:0003723//RNA binding;GO:0003724//RNA helicase activity;GO:0004386//helicase activity;GO:0005524//ATP binding;GO:0016787//hydrolase activity	-
Os02g0667500	65	22	46	5	0	7	1.35	0.44	0.88	0.1	0	0.18	0.89	0.0933333	-3.25334	8.97263e-08	3.11701e-06	-	Similar to tetracycline transporter protein	-	-	-	-	GO:0016020//membrane;GO:0016021//integral component of membrane	-	GO:0055085//transmembrane transport
Os03g0699200	26	12	49	274	279	272	0.36	0.15	0.66	3.52	3.75	4.42	0.39	3.89667	3.32069	9.02932e-08	3.13126e-06	-	BRCT domain containing protein	-	-	-	-	GO:0005634//nucleus;GO:0005654//nucleoplasm;GO:0005730//nucleolus;GO:0030687//preribosome, large subunit precursor;GO:0070545//PeBoW complex	GO:0043021//ribonucleoprotein complex binding	GO:0000463//maturation of LSU-rRNA from tricistronic rRNA transcript (SSU-rRNA, 5.8S rRNA, LSU-rRNA);GO:0000466//maturation of 5.8S rRNA from tricistronic rRNA transcript (SSU-rRNA, 5.8S rRNA, LSU-rRNA);GO:0006364//rRNA processing;GO:0042254//ribosome biogenesis;GO:0042273//ribosomal large subunit biogenesis;GO:2000232//regulation of rRNA processing
MSTRG.5391	0	0	2	70	140	89	0	0	0.03	1.7	3.35	2.45	0.01	2.5	7.96578	9.26352e-08	3.20691e-06	BPM1	BTB/POZ domain containing protein, expressed [Oryza sativa Japonica Group]	-	-	-	-	-	-	-
Os07g0604000	500	235	298	56	15	134	15.37	6.64	8.9	1.62	0.4	4.68	10.3033	2.23333	-2.20584	9.43658e-08	3.26117e-06	-	Similar to 6-phosphogluconolactonase-like protein	Metabolism;Metabolism;Metabolism;Metabolism	Global and overview maps;Global and overview maps;Global and overview maps;Carbohydrate metabolism	ko01100//Metabolic pathways;ko01110//Biosynthesis of secondary metabolites;ko01200//Carbon metabolism;ko00030//Pentose phosphate pathway	K01057;K01057;K01057;K01057	GO:0005737//cytoplasm	GO:0016787//hydrolase activity;GO:0017057//6-phosphogluconolactonase activity	GO:0005975//carbohydrate metabolic process;GO:0006098//pentose-phosphate shunt;GO:0009051//pentose-phosphate shunt, oxidative branch
Os03g0645900	128	63	36	20	14	17	1.84	0.83	0.5	0.27	0.19	0.29	1.05667	0.25	-2.07952	9.53847e-08	3.29069e-06	OsNCED1	Carotenoid oxygenase family protein	Metabolism;Metabolism;Metabolism	Global and overview maps;Global and overview maps;Metabolism of terpenoids and polyketides	ko01100//Metabolic pathways;ko01110//Biosynthesis of secondary metabolites;ko00906//Carotenoid biosynthesis	K09840;K09840;K09840	GO:0009507//chloroplast;GO:0009536//plastid;GO:0009570//chloroplast stroma	GO:0010436//carotenoid dioxygenase activity;GO:0016491//oxidoreductase activity;GO:0016702//oxidoreductase activity, acting on single donors with incorporation of molecular oxygen, incorporation of two atoms of oxygen;GO:0045549//9-cis-epoxycarotenoid dioxygenase activity;GO:0046872//metal ion binding;GO:0051213//dioxygenase activity	GO:0009688//abscisic acid biosynthetic process;GO:0016121//carotene catabolic process;GO:0055114//oxidation-reduction process
Os02g0788400	143	62	154	613	830	577	3.68	1.47	3.84	14.54	20.63	17.32	2.99667	17.4967	2.54565	9.75063e-08	3.35808e-06	eIF-3g	Similar to Eukaryotic translation initiation factor 3 subunit-like protein	Genetic Information Processing	Translation	ko03013//RNA transport	K03248	GO:0005737//cytoplasm;GO:0005852//eukaryotic translation initiation factor 3 complex;GO:0016282//eukaryotic 43S preinitiation complex;GO:0033290//eukaryotic 48S preinitiation complex	GO:0003676//nucleic acid binding;GO:0003723//RNA binding;GO:0003743//translation initiation factor activity	GO:0001732//formation of cytoplasmic translation initiation complex;GO:0002183//cytoplasmic translational initiation;GO:0006412//translation;GO:0006413//translational initiation
Os09g0482600	315	146	198	1232	3104	1368	4.03	1.73	2.4	14.22	37.76	20.88	2.72	24.2867	3.15849	1.02509e-07	3.52431e-06	OsHsp90	Similar to Heat shock protein 81-3	Organismal Systems;Genetic Information Processing	Environmental adaptation;Folding, sorting and degradation	ko04626//Plant-pathogen interaction;ko04141//Protein processing in endoplasmic reticulum	K04079;K04079	GO:0005737//cytoplasm;GO:0005829//cytosol;GO:0005886//plasma membrane;GO:0009986//cell surface;GO:0032991//macromolecular complex;GO:0048471//perinuclear region of cytoplasm	GO:0000166//nucleotide binding;GO:0005524//ATP binding;GO:0051082//unfolded protein binding	GO:0006457//protein folding;GO:0009408//response to heat;GO:0034605//cellular response to heat;GO:0050821//protein stabilization
Os04g0307500	13	0	20	157	276	217	0.12	0	0.18	1.33	2.45	2.33	0.1	2.03667	4.34814	1.0306e-07	3.53714e-06	OsWAK32	Similar to OSIGBa0113B06.2 protein	-	-	-	-	GO:0005886//plasma membrane	GO:0004674//protein serine/threonine kinase activity;GO:0030247//polysaccharide binding	GO:0006468//protein phosphorylation;GO:0007166//cell surface receptor signaling pathway
Os02g0436400	28	4	43	276	304	296	0.63	0.08	0.94	5.74	6.63	7.79	0.55	6.72	3.61096	1.0336e-07	3.54135e-06	-	NAD(P)-binding domain containing protein	Metabolism;Metabolism;Metabolism;Metabolism;Metabolism	Global and overview maps;Global and overview maps;Global and overview maps;Amino acid metabolism;Biosynthesis of other secondary metabolites	ko01100//Metabolic pathways;ko01110//Biosynthesis of secondary metabolites;ko01230//Biosynthesis of amino acids;ko00300//Lysine biosynthesis;ko00261//Monobactam biosynthesis	K00215;K00215;K00215;K00215;K00215	GO:0009507//chloroplast;GO:0009536//plastid;GO:0009570//chloroplast stroma	GO:0008839//4-hydroxy-tetrahydrodipicolinate reductase;GO:0016491//oxidoreductase activity;GO:0070402//NADPH binding	GO:0008652//cellular amino acid biosynthetic process;GO:0009085//lysine biosynthetic process;GO:0009089//lysine biosynthetic process via diaminopimelate;GO:0019877//diaminopimelate biosynthetic process;GO:0055114//oxidation-reduction process
Os06g0676700	2	1	3	44	149	114	0.02	0.06	0.04	0.56	1.63	1.68	0.04	1.29	5.01123	1.05264e-07	3.60043e-06	-	Similar to High pI alpha-glucosidase	Metabolism;Metabolism;Metabolism;Metabolism	Global and overview maps;Global and overview maps;Carbohydrate metabolism;Carbohydrate metabolism	ko01100//Metabolic pathways;ko01110//Biosynthesis of secondary metabolites;ko00500//Starch and sucrose metabolism;ko00052//Galactose metabolism	K01187;K01187;K01187;K01187	-	GO:0003824//catalytic activity;GO:0004553//hydrolase activity, hydrolyzing O-glycosyl compounds;GO:0016787//hydrolase activity;GO:0016798//hydrolase activity, acting on glycosyl bonds;GO:0030246//carbohydrate binding	GO:0005975//carbohydrate metabolic process;GO:0008152//metabolic process
Os10g0131200	10	3	16	117	238	124	0.13	0.03	0.2	1.37	2.92	1.84	0.12	2.04333	4.08982	1.0584e-07	3.61395e-06	-	Conserved hypothetical protein	-	-	-	-	GO:0016020//membrane;GO:0016021//integral component of membrane	-	-
Os03g0661600	0	0	0	146	35	58	0	0	0	3.57	0.9	1.79	0.001	2.08667	11.027	1.06561e-07	3.63235e-06	OsPR5	Similar to Alpha-amylase/trypsin inhibitor (Antifungal protein)	-	-	-	-	GO:0005576//extracellular region;GO:0016020//membrane;GO:0016021//integral component of membrane	-	GO:0006952//defense response
Os04g0473400	24	2	25	177	247	222	0.76	0.06	0.77	5.19	7.6	8.24	0.53	7.01	3.72535	1.07455e-07	3.65658e-06	OsRPL6	Similar to 60S ribosomal protein L6-B (L17) (YL16) (RP18)	Genetic Information Processing	Translation	ko03010//Ribosome	K02934	GO:0005840//ribosome;GO:0022625//cytosolic large ribosomal subunit	GO:0003723//RNA binding;GO:0003735//structural constituent of ribosome	GO:0000027//ribosomal large subunit assembly;GO:0002181//cytoplasmic translation;GO:0006412//translation
Os01g0823300	71	25	65	267	427	427	3.33	1.07	2.95	11.52	19.3	23.31	2.45	18.0433	2.88061	1.11368e-07	3.77687e-06	OsRPS26	Similar to Ribosomal protein S26	Genetic Information Processing	Translation	ko03010//Ribosome	K02976	GO:0005840//ribosome;GO:0022627//cytosolic small ribosomal subunit	GO:0003729//mRNA binding;GO:0003735//structural constituent of ribosome	GO:0006412//translation
Os01g0639900	66670	28226	28522	10587	7907	25625	1699.19	660.27	703.27	248.52	194.53	761.28	1020.91	401.443	-1.34659	1.13011e-07	3.8261e-06	BETACA1	beta-carbonic anhydrase (EC:4.2.1.1), Carbon assimilation, CO<sub>2</sub>-mediated stomatal pore respons	Metabolism;Metabolism	Global and overview maps;Energy metabolism	ko01100//Metabolic pathways;ko00910//Nitrogen metabolism	K01673;K01673	GO:0005737//cytoplasm	GO:0004089//carbonate dehydratase activity;GO:0008270//zinc ion binding;GO:0016829//lyase activity	GO:0009440//cyanate catabolic process;GO:0010037//response to carbon dioxide;GO:0010119//regulation of stomatal movement;GO:0015976//carbon utilization
Os06g0718400	0	0	0	55	118	40	0	0	0	1.6	3.6	1.47	0.001	2.22333	11.1185	1.13862e-07	3.8419e-06	OsUCL18	Hypothetical conserved gene	-	-	-	-	GO:0016021//integral component of membrane;GO:0046658//anchored component of plasma membrane	GO:0009055//electron carrier activity	GO:0022900//electron transport chain
Os01g0375200	81	25	75	444	326	582	1.31	0.39	1.31	7.22	5.16	11.44	1.00333	7.94	2.98434	1.15024e-07	3.86904e-06	DHQDT/SDH	Similar to shikimate biosynthesis protein aroDE	Metabolism;Metabolism;Metabolism;Metabolism	Global and overview maps;Global and overview maps;Global and overview maps;Amino acid metabolism	ko01100//Metabolic pathways;ko01110//Biosynthesis of secondary metabolites;ko01230//Biosynthesis of amino acids;ko00400//Phenylalanine, tyrosine and tryptophan biosynthesis	K13832;K13832;K13832;K13832	-	GO:0003824//catalytic activity;GO:0003855//3-dehydroquinate dehydratase activity;GO:0004764//shikimate 3-dehydrogenase (NADP+) activity;GO:0050661//NADP binding	GO:0009423//chorismate biosynthetic process;GO:0019632//shikimate metabolic process;GO:0055114//oxidation-reduction process
Os06g0726100	0	0	0	145	27	75	0	0	0	3.39	0.67	2.22	0.001	2.09333	11.0316	1.15054e-07	3.86904e-06	Cht3*	Similar to Seed chitinase-c	Metabolism;Environmental Information Processing;Metabolism	Global and overview maps;Signal transduction;Carbohydrate metabolism	ko01100//Metabolic pathways;ko04016//MAPK signaling pathway - plant;ko00520//Amino sugar and nucleotide sugar metabolism	K20547;K20547;K20547	-	GO:0004568//chitinase activity;GO:0008061//chitin binding;GO:0008843//endochitinase activity;GO:0016231//beta-N-acetylglucosaminidase activity;GO:0016787//hydrolase activity;GO:0016798//hydrolase activity, acting on glycosyl bonds;GO:0030247//polysaccharide binding	GO:0000272//polysaccharide catabolic process;GO:0005975//carbohydrate metabolic process;GO:0006032//chitin catabolic process;GO:0006040//amino sugar metabolic process;GO:0006952//defense response;GO:0008152//metabolic process;GO:0016998//cell wall macromolecule catabolic process;GO:0050832//defense response to fungus
Os08g0127100	411	93	434	2211	1776	2045	7.01	1.45	7.14	34.68	29.11	40.54	5.2	34.7767	2.74154	1.18895e-07	3.98477e-06	OsHT	Amino acid transporter, transmembrane family protein	-	-	-	-	GO:0005886//plasma membrane;GO:0016020//membrane;GO:0016021//integral component of membrane	GO:0015171//amino acid transmembrane transporter activity	GO:0003333//amino acid transmembrane transport
Os02g0814700	17	11	19	132	251	166	0.74	0.43	0.77	5.17	10.31	8.22	0.646667	7.9	3.61076	1.20072e-07	4.01697e-06	-	Similar to Ribosomal Pr 117 (Fragment)	Genetic Information Processing	Translation	ko03010//Ribosome	K02894	GO:0005840//ribosome;GO:0022625//cytosolic large ribosomal subunit	GO:0003735//structural constituent of ribosome;GO:0070180//large ribosomal subunit rRNA binding	GO:0006412//translation
Os07g0592600	26	8	14	253	121	229	0.34	0.1	0.18	3.06	1.53	3.5	0.206667	2.69667	3.7058	1.20258e-07	4.01697e-06	GH3-8	Indole-3-acetic acid (IAA)-amido synthetase, Auxin signaling and defense signaling in a pathogen-nonspecific manne	Environmental Information Processing	Signal transduction	ko04075//Plant hormone signal transduction	K14487	GO:0005737//cytoplasm	GO:0016874//ligase activity;GO:0016881//acid-amino acid ligase activity	-
Os07g0677200	1169	45	757	7817	11775	10947	27.11	0.98	17.02	167.39	264.3	297.35	15.0367	243.013	4.01448	1.20873e-07	4.03078e-06	POX22.3	Peroxidase	Metabolism;Metabolism;Metabolism	Global and overview maps;Global and overview maps;Biosynthesis of other secondary metabolites	ko01100//Metabolic pathways;ko01110//Biosynthesis of secondary metabolites;ko00940//Phenylpropanoid biosynthesis	K00430;K00430;K00430	GO:0005576//extracellular region	GO:0004601//peroxidase activity;GO:0016491//oxidoreductase activity;GO:0020037//heme binding;GO:0046872//metal ion binding	GO:0006979//response to oxidative stress;GO:0042744//hydrogen peroxide catabolic process;GO:0055114//oxidation-reduction process;GO:0098869//cellular oxidant detoxification
Os01g0113900	115	45	124	19	4	29	1.56	0.56	1.62	0.24	0.05	0.46	1.24667	0.25	-2.31808	1.22948e-07	4.08635e-06	-	Similar to Receptor-like protein kinase	-	-	-	-	-	GO:0016301//kinase activity	-
Os07g0663800	239	46	277	1774	1597	1125	6.88	1.21	7.72	47	44.36	37.73	5.27	43.03	3.02947	1.28018e-07	4.24778e-06	OsSDR110C-MI4	Similar to Oxidoreductase, short chain dehydrogenase/reductase family protein, expressed	-	-	-	-	-	-	-
Os03g0254800	329	151	230	1279	1281	1024	6.09	2.57	4.12	21.8	22.9	22.09	4.26	22.2633	2.38574	1.28934e-07	4.26401e-06	CS	Similar to Chorismate synthase 1, chloroplast precursor (EC 4.2.3.5) (5- enolpyruvylshikimate-3-phosphate phospholyase 1)	Metabolism;Metabolism;Metabolism;Metabolism	Global and overview maps;Global and overview maps;Global and overview maps;Amino acid metabolism	ko01100//Metabolic pathways;ko01110//Biosynthesis of secondary metabolites;ko01230//Biosynthesis of amino acids;ko00400//Phenylalanine, tyrosine and tryptophan biosynthesis	K01736;K01736;K01736;K01736	GO:0005730//nucleolus;GO:0005829//cytosol;GO:0009507//chloroplast;GO:0009536//plastid;GO:0009570//chloroplast stroma	GO:0004107//chorismate synthase activity;GO:0010181//FMN binding;GO:0016829//lyase activity	GO:0008652//cellular amino acid biosynthetic process;GO:0009073//aromatic amino acid family biosynthetic process;GO:0009423//chorismate biosynthetic process
Os11g0641500	4	0	11	333	55	276	0.06	0	0.15	4.41	0.76	4.63	0.07	3.26667	5.54432	1.29669e-07	4.28123e-06	OsLAC23	Cupredoxin domain containing protein	-	-	-	-	GO:0005576//extracellular region;GO:0005886//plasma membrane;GO:0048046//apoplast	GO:0004322//ferroxidase activity;GO:0005507//copper ion binding;GO:0016491//oxidoreductase activity;GO:0016722//oxidoreductase activity, oxidizing metal ions;GO:0046872//metal ion binding;GO:0052716//hydroquinone:oxygen oxidoreductase activity	GO:0006826//iron ion transport;GO:0046274//lignin catabolic process;GO:0055072//iron ion homeostasis;GO:0055114//oxidation-reduction process
Os03g0279400	68	24	119	651	722	456	1.17	0.42	1.97	10.28	11.96	9.14	1.18667	10.46	3.1399	1.29955e-07	4.28359e-06	-	Similar to predicted protein	Metabolism;Metabolism;Metabolism;Metabolism;Metabolism	Global and overview maps;Global and overview maps;Global and overview maps;Global and overview maps;Amino acid metabolism	ko01100//Metabolic pathways;ko01110//Biosynthesis of secondary metabolites;ko01230//Biosynthesis of amino acids;ko01210//2-Oxocarboxylic acid metabolism;ko00220//Arginine biosynthesis	K00620;K00620;K00620;K00620;K00620	GO:0009507//chloroplast;GO:0009536//plastid;GO:0009570//chloroplast stroma	GO:0003824//catalytic activity;GO:0004042//acetyl-CoA:L-glutamate N-acetyltransferase activity;GO:0004358//glutamate N-acetyltransferase activity;GO:0016740//transferase activity;GO:0016746//transferase activity, transferring acyl groups	GO:0006526//arginine biosynthetic process;GO:0006592//ornithine biosynthetic process;GO:0008152//metabolic process;GO:0008652//cellular amino acid biosynthetic process
Os07g0614000	495	217	334	194	91	208	10.19	4.08	6.68	3.7	1.82	4.93	6.98333	3.48333	-1.00345	1.30681e-07	4.30043e-06	OsSTRL12	Six-bladed beta-propeller, TolB-like domain containing protein	-	-	-	-	GO:0005783//endoplasmic reticulum;GO:0016020//membrane	GO:0016844//strictosidine synthase activity	GO:0009058//biosynthetic process
Os03g0853800	43	14	26	203	285	193	1.31	0.33	0.65	4.83	7.27	5.81	0.763333	5.97	2.96735	1.31822e-07	4.33083e-06	-	Protein of unknown function DUF1301 family protein	-	-	-	-	GO:0005739//mitochondrion;GO:0016020//membrane;GO:0016021//integral component of membrane	-	-
Os12g0150100	35	10	50	253	411	251	1.55	0.41	2.14	10.3	17.53	12.93	1.36667	13.5867	3.31346	1.36406e-07	4.46674e-06	-	Similar to 60S ribosomal protein L26A	Genetic Information Processing	Translation	ko03010//Ribosome	K02898	GO:0005840//ribosome;GO:0015934//large ribosomal subunit;GO:0022625//cytosolic large ribosomal subunit	GO:0003723//RNA binding;GO:0003735//structural constituent of ribosome	GO:0002181//cytoplasmic translation;GO:0006412//translation;GO:0042273//ribosomal large subunit biogenesis
Os04g0597600	0	0	0	88	19	169	0	0	0	0.82	0.19	1.99	0.001	1	9.96578	1.37543e-07	4.48441e-06	OsPTR5	TGF-beta receptor, type I/II extracellular region family protein	-	-	-	-	GO:0016020//membrane;GO:0016021//integral component of membrane	GO:0015333//peptide:proton symporter activity;GO:0022857//transmembrane transporter activity;GO:0035673//oligopeptide transmembrane transporter activity;GO:1904680//peptide transmembrane transporter activity	GO:0035672//oligopeptide transmembrane transport;GO:0042886//amide transport;GO:0055085//transmembrane transport;GO:1902600//hydrogen ion transmembrane transport
Os03g0760700	35	14	22	179	316	184	0.75	0.28	0.46	3.54	6.55	4.6	0.496667	4.89667	3.30145	1.37844e-07	4.48441e-06	-	Similar to Aspartate-semialdehyde dehydrogenase (EC 1.2.1.11) (Fragment)	Metabolism;Metabolism;Metabolism;Metabolism;Metabolism;Metabolism;Metabolism;Metabolism	Global and overview maps;Global and overview maps;Global and overview maps;Amino acid metabolism;Amino acid metabolism;Global and overview maps;Amino acid metabolism;Biosynthesis of other secondary metabolites	ko01100//Metabolic pathways;ko01110//Biosynthesis of secondary metabolites;ko01230//Biosynthesis of amino acids;ko00270//Cysteine and methionine metabolism;ko00260//Glycine, serine and threonine metabolism;ko01210//2-Oxocarboxylic acid metabolism;ko00300//Lysine biosynthesis;ko00261//Monobactam biosynthesis	K00133;K00133;K00133;K00133;K00133;K00133;K00133;K00133	GO:0005739//mitochondrion;GO:0009507//chloroplast;GO:0009536//plastid;GO:0009570//chloroplast stroma	GO:0004073//aspartate-semialdehyde dehydrogenase activity;GO:0016620//oxidoreductase activity, acting on the aldehyde or oxo group of donors, NAD or NADP as acceptor;GO:0046983//protein dimerization activity;GO:0050661//NADP binding;GO:0051287//NAD binding	GO:0008652//cellular amino acid biosynthetic process;GO:0009086//methionine biosynthetic process;GO:0009088//threonine biosynthetic process;GO:0009089//lysine biosynthetic process via diaminopimelate;GO:0009097//isoleucine biosynthetic process;GO:0055114//oxidation-reduction process
Os05g0287800	61	22	59	291	314	281	1.25	0.41	1.17	5.51	6.23	6.73	0.943333	6.15667	2.70631	1.38419e-07	4.49581e-06	-	Similar to Phosphatidic acid phosphatase-like protein	-	-	-	-	GO:0005802//trans-Golgi network;GO:0005887//integral component of plasma membrane;GO:0016020//membrane;GO:0016021//integral component of membrane;GO:0030173//integral component of Golgi membrane;GO:0030176//integral component of endoplasmic reticulum membrane	GO:0033188//sphingomyelin synthase activity;GO:0045140//inositol phosphoceramide synthase activity;GO:0047493//ceramide cholinephosphotransferase activity	GO:0030148//sphingolipid biosynthetic process;GO:0046513//ceramide biosynthetic process
Os01g0564300	9	9	77	785	646	589	0.17	0.16	1.39	13.51	11.65	12.82	0.573333	12.66	4.46476	1.40289e-07	4.54176e-06	OsFKBP46	Peptidyl-prolyl cis-trans isomerase, FKBP-type domain containing protein	-	-	-	-	GO:0005737//cytoplasm	GO:0003755//peptidyl-prolyl cis-trans isomerase activity;GO:0016853//isomerase activity	GO:0000413//protein peptidyl-prolyl isomerization;GO:0061077//chaperone-mediated protein folding
Os01g0276000	57	5	74	489	530	639	2.69	0.22	3.37	21.23	24.11	35.1	2.09333	26.8133	3.67908	1.41542e-07	4.57492e-06	-	Similar to 60S ribosomal protein L30	Genetic Information Processing	Translation	ko03010//Ribosome	K02908	GO:0005840//ribosome;GO:0022625//cytosolic large ribosomal subunit	GO:0003723//RNA binding;GO:0003735//structural constituent of ribosome	GO:0006412//translation
Os02g0782500	79	23	49	9	0	4	2.83	0.76	1.7	0.3	0	0.17	1.76333	0.156667	-3.49254	1.43405e-07	4.62017e-06	OsHSP18.0-CIII	Similar to Small heat stress protein class CIII	Genetic Information Processing	Folding, sorting and degradation	ko04141//Protein processing in endoplasmic reticulum	K13993	GO:0005737//cytoplasm	GO:0043621//protein self-association;GO:0051082//unfolded protein binding	GO:0000302//response to reactive oxygen species;GO:0006457//protein folding;GO:0009408//response to heat;GO:0009644//response to high light intensity;GO:0009651//response to salt stress;GO:0042542//response to hydrogen peroxide;GO:0051259//protein oligomerization
Os08g0493900	91	25	95	573	515	377	0.9	0.21	0.89	5.3	4.85	4.42	0.666667	4.85667	2.86493	1.49427e-07	4.79872e-06	OsWD40-161	WD40 repeat-like domain containing protein	-	-	-	-	-	GO:0005515//protein binding	GO:0016573//histone acetylation;GO:0044030//regulation of DNA methylation;GO:1901535//regulation of DNA demethylation
Os03g0788500	108	44	97	557	764	383	1.22	0.45	1.06	5.77	8.3	5.02	0.91	6.36333	2.80584	1.50382e-07	4.82164e-06	CDPK10	Calcium-dependent protein kinase, Regulaton of immune responses, Disease resistanc	Organismal Systems	Environmental adaptation	ko04626//Plant-pathogen interaction	K13412	GO:0005634//nucleus;GO:0005737//cytoplasm;GO:0016020//membrane	GO:0000166//nucleotide binding;GO:0004672//protein kinase activity;GO:0004674//protein serine/threonine kinase activity;GO:0004683//calmodulin-dependent protein kinase activity;GO:0005509//calcium ion binding;GO:0005516//calmodulin binding;GO:0005524//ATP binding;GO:0009931//calcium-dependent protein serine/threonine kinase activity;GO:0016301//kinase activity;GO:0016740//transferase activity;GO:…	GO:0006468//protein phosphorylation;GO:0009738//abscisic acid-activated signaling pathway;GO:0016310//phosphorylation;GO:0018105//peptidyl-serine phosphorylation;GO:0035556//intracellular signal transduction;GO:0046777//protein autophosphorylation
Os04g0316200	11	1	50	646	467	415	0.29	0.03	1.27	15.51	11.75	12.61	0.53	13.29	4.6482	1.51331e-07	4.84391e-06	-	Protein of unknown function DUF26 domain containing protein	-	-	-	-	-	-	-
Os06g0210900	0	0	10	157	274	121	0	0	0.17	2.47	4.52	2.41	0.0566667	3.13333	5.78905	1.51562e-07	4.84391e-06	-	Lipase, class 3 family protein	-	-	-	-	-	GO:0016787//hydrolase activity	GO:0006629//lipid metabolic process
Os07g0301200	86	35	37	412	471	343	1.28	0.49	0.51	5.74	6.82	6	0.76	6.18667	3.02509	1.52983e-07	4.88154e-06	OsRH5	Similar to RNA helicase (Fragment)	-	-	-	-	GO:0005634//nucleus;GO:0005730//nucleolus;GO:0005829//cytosol	GO:0000166//nucleotide binding;GO:0003676//nucleic acid binding;GO:0003723//RNA binding;GO:0003724//RNA helicase activity;GO:0004386//helicase activity;GO:0005524//ATP binding;GO:0016787//hydrolase activity	GO:0006364//rRNA processing;GO:0042254//ribosome biogenesis
Os02g0704000	5407	566	2626	597	236	997	77.26	7.42	36.31	7.86	3.25	16.61	40.33	9.24	-2.12589	1.57452e-07	5.0161e-06	OsNCED1	Carotenoid oxygenase family protein	Metabolism;Metabolism;Metabolism	Global and overview maps;Global and overview maps;Metabolism of terpenoids and polyketides	ko01100//Metabolic pathways;ko01110//Biosynthesis of secondary metabolites;ko00906//Carotenoid biosynthesis	K09840;K09840;K09840	GO:0009507//chloroplast;GO:0009536//plastid;GO:0009570//chloroplast stroma	GO:0010436//carotenoid dioxygenase activity;GO:0016491//oxidoreductase activity;GO:0016702//oxidoreductase activity, acting on single donors with incorporation of molecular oxygen, incorporation of two atoms of oxygen;GO:0045549//9-cis-epoxycarotenoid dioxygenase activity;GO:0046872//metal ion binding;GO:0051213//dioxygenase activity	GO:0009688//abscisic acid biosynthetic process;GO:0016121//carotene catabolic process;GO:0055114//oxidation-reduction process
Os05g0582000	35	18	42	5	1	4	0.89	0.42	1.03	0.12	0.02	0.12	0.78	0.0866667	-3.16993	1.60835e-07	5.10759e-06	-	Plant Basic Secretory Protein domain containing protein	-	-	-	-	-	-	-
Os03g0297600	354	92	348	2212	3222	1135	8.96	2.14	8.52	51.56	78.72	33.5	6.54	54.5933	3.06136	1.63086e-07	5.17087e-06	OsPYL/RCAR4	Streptomyces cyclase/dehydrase family protein	Environmental Information Processing;Environmental Information Processing	Signal transduction;Signal transduction	ko04075//Plant hormone signal transduction;ko04016//MAPK signaling pathway - plant	K14496;K14496	GO:0005634//nucleus;GO:0005737//cytoplasm	GO:0004864//protein phosphatase inhibitor activity;GO:0010427//abscisic acid binding;GO:0038023//signaling receptor activity	GO:0009738//abscisic acid-activated signaling pathway;GO:0032515//negative regulation of phosphoprotein phosphatase activity;GO:0080163//regulation of protein serine/threonine phosphatase activity
Os05g0215000	136	70	84	15	38	43	3.02	1.43	1.81	0.31	0.82	1.11	2.08667	0.746667	-1.48266	1.65693e-07	5.22176e-06	OsBURP01	BURP domain containing protein	-	-	-	-	-	-	-
Os11g0261900	94	46	65	423	492	361	1.85	0.83	1.24	7.68	9.36	8.29	1.30667	8.44333	2.69192	1.65737e-07	5.22176e-06	-	Metallophosphoesterase domain containing protein	-	-	-	-	GO:0005829//cytosol	GO:0016787//hydrolase activity;GO:0016791//phosphatase activity;GO:0030145//manganese ion binding	GO:0016311//dephosphorylation
Os08g0111300	12	5	33	235	242	201	0.19	0.07	0.52	3.5	3.78	3.79	0.26	3.69	3.82704	1.67989e-07	5.27608e-06	-	Transferase family protein	-	-	-	-	-	GO:0016747//transferase activity, transferring acyl groups other than amino-acyl groups	-
Os03g0401100	1079	335	579	169	103	388	8.43	2.4	4.38	1.22	0.78	3.53	5.07	1.84333	-1.45967	1.71293e-07	5.37139e-06	-	Similar to Protein kinase domain containing protein, expressed	-	-	-	-	-	GO:0004672//protein kinase activity;GO:0005515//protein binding;GO:0005524//ATP binding;GO:0016301//kinase activity	GO:0006468//protein phosphorylation;GO:0016310//phosphorylation
Os08g0126300	2827	843	2175	8267	7961	9129	61.55	23.47	48.03	181.9	190.65	251.94	44.35	208.163	2.23071	1.73772e-07	5.44059e-06	OsGapC3	Similar to Glyceraldehyde-3-phosphate dehydrogenase (Fragment)	Metabolism;Metabolism;Metabolism;Metabolism;Metabolism;Metabolism	Global and overview maps;Global and overview maps;Global and overview maps;Global and overview maps;Carbohydrate metabolism;Energy metabolism	ko01100//Metabolic pathways;ko01110//Biosynthesis of secondary metabolites;ko01200//Carbon metabolism;ko01230//Biosynthesis of amino acids;ko00010//Glycolysis / Gluconeogenesis;ko00710//Carbon fixation in photosynthetic organisms	K00134;K00134;K00134;K00134;K00134;K00134	GO:0005737//cytoplasm;GO:0005829//cytosol	GO:0000166//nucleotide binding;GO:0004365//glyceraldehyde-3-phosphate dehydrogenase (NAD+) (phosphorylating) activity;GO:0016491//oxidoreductase activity;GO:0016620//oxidoreductase activity, acting on the aldehyde or oxo group of donors, NAD or NADP as acceptor;GO:0050661//NADP binding;GO:0051287//NAD binding	GO:0006006//glucose metabolic process;GO:0006096//glycolytic process;GO:0055114//oxidation-reduction process
Os01g0358400	10	2	22	168	173	172	0.27	0.05	0.61	4.44	4.79	5.75	0.31	4.99333	4.00966	1.77232e-07	5.54023e-06	RPS4	Similar to 40S ribosomal protein S4	Genetic Information Processing	Translation	ko03010//Ribosome	K02987	GO:0005840//ribosome;GO:0022627//cytosolic small ribosomal subunit	GO:0003723//RNA binding;GO:0003735//structural constituent of ribosome;GO:0019843//rRNA binding	GO:0006412//translation
Os02g0120900	14	4	14	121	252	108	0.24	0.06	0.23	1.92	4.19	2.17	0.176667	2.76	3.96557	1.85008e-07	5.76528e-06	-	Tetrahydrofolate dehydrogenase/cyclohydrolase family protein	-	-	-	-	GO:0005829//cytosol	GO:0003824//catalytic activity;GO:0004477//methenyltetrahydrofolate cyclohydrolase activity;GO:0004488//methylenetetrahydrofolate dehydrogenase (NADP+) activity	GO:0006730//one-carbon metabolic process;GO:0035999//tetrahydrofolate interconversion;GO:0046653//tetrahydrofolate metabolic process;GO:0055114//oxidation-reduction process
Os07g0622200	759	666	546	6167	6783	4603	11.46	9.23	7.98	85.78	98.9	81.03	9.55667	88.57	3.21224	1.85331e-07	5.76634e-06	OsDAHP1	3-Deoxy-D-arabino-heptulosonate 7-phosphate synthase, Chorismate biosynthesi	Metabolism;Metabolism;Metabolism;Metabolism	Global and overview maps;Global and overview maps;Global and overview maps;Amino acid metabolism	ko01100//Metabolic pathways;ko01110//Biosynthesis of secondary metabolites;ko01230//Biosynthesis of amino acids;ko00400//Phenylalanine, tyrosine and tryptophan biosynthesis	K01626;K01626;K01626;K01626	GO:0009507//chloroplast;GO:0009536//plastid	GO:0003824//catalytic activity;GO:0003849//3-deoxy-7-phosphoheptulonate synthase activity;GO:0016740//transferase activity	GO:0008652//cellular amino acid biosynthetic process;GO:0009073//aromatic amino acid family biosynthetic process;GO:0009423//chorismate biosynthetic process
Os04g0449900	94	38	90	365	467	394	1.71	0.63	1.59	14.27	8.2	8.34	1.31	10.27	2.9708	1.87983e-07	5.83769e-06	-	Similar to RNA Binding Protein 47	-	-	-	-	GO:0005829//cytosol	GO:0003676//nucleic acid binding;GO:0003723//RNA binding;GO:0003729//mRNA binding	-
gene-psbD	201874	113015	140778	76748	31865	96862	5644.09	2900.11	3807.8	1976.34	860.04	3156.68	4117.33	1997.69	-1.04338	1.88295e-07	5.83769e-06	-	-	Metabolism;Metabolism	Global and overview maps;Energy metabolism	ko01100//Metabolic pathways;ko00195//Photosynthesis	K02706;K02706	GO:0009523//photosystem II;GO:0016020//membrane	GO:0045156//electron transporter, transferring electrons within the cyclic electron transport pathway of photosynthesis activity	GO:0009772//photosynthetic electron transport in photosystem II;GO:0015979//photosynthesis;GO:0019684//photosynthesis, light reaction
Os01g0615300	179	52	133	602	669	572	3.41	0.91	2.46	10.58	12.28	12.72	2.26	11.86	2.39171	1.88501e-07	5.83769e-06	OsAT1	Transferase family protein	-	-	-	-	-	GO:0016410//N-acyltransferase activity;GO:0016747//transferase activity, transferring acyl groups other than amino-acyl groups	-
Os11g0698567	416	334	174	74	27	126	12.42	9.15	5.04	2.03	0.77	4.38	8.87	2.39333	-1.88991	1.90082e-07	5.87755e-06	-	Conserved hypothetical protein	-	-	-	-	-	-	-
Os03g0277700	0	0	0	60	52	59	0	0	0	1.43	1.3	1.78	0.001	1.50333	10.5539	1.91704e-07	5.90938e-06	-	Protein of unknown function DUF26 domain containing protein	-	-	-	-	-	-	-
Os08g0559600	4	0	11	109	153	116	0.06	0	0.17	1.53	2.34	2.08	0.0766667	1.98333	4.69318	1.99789e-07	6.14912e-06	Dad	Similar to Dihydroxy-acid dehydratase (EC 4.2.1.9) (DAD)	Metabolism;Metabolism;Metabolism;Metabolism;Metabolism;Metabolism	Global and overview maps;Global and overview maps;Global and overview maps;Global and overview maps;Metabolism of cofactors and vitamins;Amino acid metabolism	ko01100//Metabolic pathways;ko01110//Biosynthesis of secondary metabolites;ko01230//Biosynthesis of amino acids;ko01210//2-Oxocarboxylic acid metabolism;ko00770//Pantothenate and CoA biosynthesis;ko00290//Valine, leucine and isoleucine biosynthesis	K01687;K01687;K01687;K01687;K01687;K01687	GO:0009507//chloroplast;GO:0009536//plastid;GO:0009570//chloroplast stroma	GO:0003824//catalytic activity;GO:0004160//dihydroxy-acid dehydratase activity;GO:0005507//copper ion binding;GO:0016836//hydro-lyase activity	GO:0009082//branched-chain amino acid biosynthetic process;GO:0009553//embryo sac development;GO:0009555//pollen development;GO:0009651//response to salt stress;GO:0048364//root development
Os06g0133900	139	23	106	788	549	652	2.34	0.36	1.73	12.22	8.93	12.8	1.47667	11.3167	2.93803	2.05285e-07	6.30856e-06	EPSPS	5-enolpyruvylshikimate-3-phosphate synthas	Metabolism;Metabolism;Metabolism;Metabolism	Global and overview maps;Global and overview maps;Global and overview maps;Amino acid metabolism	ko01100//Metabolic pathways;ko01110//Biosynthesis of secondary metabolites;ko01230//Biosynthesis of amino acids;ko00400//Phenylalanine, tyrosine and tryptophan biosynthesis	K00800;K00800;K00800;K00800	-	GO:0003824//catalytic activity;GO:0003866//3-phosphoshikimate 1-carboxyvinyltransferase activity;GO:0016765//transferase activity, transferring alkyl or aryl (other than methyl) groups	GO:0009073//aromatic amino acid family biosynthetic process
Os10g0515900	4	0	0	134	41	207	0.06	0	0	1.96	0.63	3.83	0.02	2.14	6.74147	2.09446e-07	6.41668e-06	-	Cytochrome P450 family protein	Metabolism	Global and overview maps	ko01100//Metabolic pathways	K00512	GO:0016020//membrane;GO:0016021//integral component of membrane	GO:0004497//monooxygenase activity;GO:0005506//iron ion binding;GO:0016491//oxidoreductase activity;GO:0016705//oxidoreductase activity, acting on paired donors, with incorporation or reduction of molecular oxygen;GO:0016709//oxidoreductase activity, acting on paired donors, with incorporation or reduction of molecular oxygen, NAD(P)H as one donor, and incorporation of one atom of oxygen;GO:00200…	GO:0055114//oxidation-reduction process
Os06g0328400	0	0	2	74	112	76	0	0	0.02	0.81	1.28	1.05	0.00666667	1.04667	7.29462	2.10551e-07	6.43342e-06	-	Protein kinase, catalytic domain domain containing protein	-	-	-	-	GO:0005886//plasma membrane;GO:0016020//membrane;GO:0016021//integral component of membrane	GO:0004672//protein kinase activity;GO:0004675//transmembrane receptor protein serine/threonine kinase activity;GO:0005524//ATP binding;GO:0030246//carbohydrate binding	GO:0002229//defense response to oomycetes;GO:0006468//protein phosphorylation;GO:0006952//defense response;GO:0042742//defense response to bacterium
Os03g0851000	2	0	0	84	79	90	0.06	0	0	2.43	2.41	3.28	0.02	2.70667	7.08037	2.10784e-07	6.43342e-06	Osj3g2BTF3	Similar to Transcription factor homolog BTF3-like protein	-	-	-	-	GO:0005829//cytosol;GO:0005854//nascent polypeptide-associated complex;GO:0042788//polysomal ribosome	-	GO:0009651//response to salt stress
Os04g0674700	170	13	177	1531	1317	1282	2.66	0.19	2.68	22.07	19.9	23.39	1.84333	21.7867	3.56306	2.10958e-07	6.43342e-06	-	Similar to AMP-binding protein (Adenosine monophosphate binding protein 5 AMPBP5)	-	-	-	-	-	GO:0003824//catalytic activity	-
Os05g0165900	13	3	23	150	215	152	0.14	0.03	0.23	1.45	2.18	1.86	0.133333	1.83	3.77873	2.15291e-07	6.55511e-06	-	Serine/threonine protein kinase-related domain containing protein	-	-	-	-	GO:0005886//plasma membrane;GO:0016020//membrane;GO:0016021//integral component of membrane	GO:0000166//nucleotide binding;GO:0004672//protein kinase activity;GO:0004674//protein serine/threonine kinase activity;GO:0005524//ATP binding;GO:0016301//kinase activity;GO:0016740//transferase activity	GO:0006468//protein phosphorylation;GO:0016310//phosphorylation;GO:0048544//recognition of pollen
Os02g0600400	11	5	8	98	133	101	0.16	0.07	0.11	1.33	1.9	1.74	0.113333	1.65667	3.86964	2.15605e-07	6.55511e-06	OsG6PDH1	Similar to Glucose-6-phosphate dehydrogenase	Metabolism;Metabolism;Metabolism;Metabolism;Metabolism	Global and overview maps;Global and overview maps;Global and overview maps;Metabolism of other amino acids;Carbohydrate metabolism	ko01100//Metabolic pathways;ko01110//Biosynthesis of secondary metabolites;ko01200//Carbon metabolism;ko00480//Glutathione metabolism;ko00030//Pentose phosphate pathway	K00036;K00036;K00036;K00036;K00036	-	GO:0004345//glucose-6-phosphate dehydrogenase activity;GO:0016491//oxidoreductase activity;GO:0016614//oxidoreductase activity, acting on CH-OH group of donors;GO:0050661//NADP binding	GO:0005975//carbohydrate metabolic process;GO:0006006//glucose metabolic process;GO:0006098//pentose-phosphate shunt;GO:0055114//oxidation-reduction process
Os05g0100600	105	24	122	521	591	655	1.56	0.33	1.79	7.13	8.55	11.44	1.22667	9.04	2.88158	2.22139e-07	6.7435e-06	-	Similar to aminophospholipid ATPase	-	-	-	-	GO:0000139//Golgi membrane;GO:0005802//trans-Golgi network;GO:0005886//plasma membrane;GO:0016020//membrane;GO:0016021//integral component of membrane	GO:0000166//nucleotide binding;GO:0000287//magnesium ion binding;GO:0004012//phospholipid-translocating ATPase activity;GO:0005524//ATP binding	GO:0015914//phospholipid transport;GO:0045332//phospholipid translocation;GO:0048194//Golgi vesicle budding
Os09g0484900	1784	567	732	284	153	578	27.03	7.88	10.74	3.97	2.23	10.21	15.2167	5.47	-1.47604	2.23763e-07	6.78249e-06	-	Sodium/sulphate symporter family protein	-	-	-	-	GO:0016020//membrane;GO:0016021//integral component of membrane	GO:0005215//transporter activity;GO:0022857//transmembrane transporter activity	GO:0006814//sodium ion transport;GO:0055085//transmembrane transport;GO:0098656//anion transmembrane transport
Os09g0394300	24	10	14	158	160	143	0.44	0.17	0.25	2.69	2.86	3.08	0.286667	2.87667	3.32695	2.27703e-07	6.88103e-06	OsGH9B11	Glycoside hydrolase, family 9 protein	-	-	-	-	-	GO:0003824//catalytic activity;GO:0004553//hydrolase activity, hydrolyzing O-glycosyl compounds;GO:0008810//cellulase activity;GO:0016787//hydrolase activity;GO:0016798//hydrolase activity, acting on glycosyl bonds	GO:0000272//polysaccharide catabolic process;GO:0005975//carbohydrate metabolic process;GO:0008152//metabolic process;GO:0030245//cellulose catabolic process
Os10g0578950	190	81	102	54	42	72	3.36	1.31	1.74	0.88	0.72	1.48	2.13667	1.02667	-1.05739	2.30145e-07	6.93386e-06	OsACS2	Similar to 4-coumarate--CoA ligase-like 2	Metabolism;Metabolism;Metabolism;Metabolism	Global and overview maps;Global and overview maps;Biosynthesis of other secondary metabolites;Metabolism of cofactors and vitamins	ko01100//Metabolic pathways;ko01110//Biosynthesis of secondary metabolites;ko00940//Phenylpropanoid biosynthesis;ko00130//Ubiquinone and other terpenoid-quinone biosynthesis	K01904;K01904;K01904;K01904	GO:0016020//membrane;GO:0016021//integral component of membrane	GO:0003824//catalytic activity	-
Os10g0469600	2	0	7	122	98	82	0.02	0	0.05	0.8	0.67	0.68	0.0233333	0.716667	4.94084	2.36665e-07	7.09817e-06	-	Similar to Leucine Rich Repeat family protein, expressed	-	-	-	-	GO:0016020//membrane;GO:0016021//integral component of membrane	GO:0005515//protein binding	-
Os09g0453500	33	13	26	165	242	179	0.55	0.2	0.42	2.55	3.92	3.5	0.39	3.32333	3.09108	2.41788e-07	7.2301e-06	-	Spectrin repeat containing protein	Genetic Information Processing	Translation	ko03013//RNA transport	K14307	GO:0005643//nuclear pore	GO:0008139//nuclear localization sequence binding;GO:0017056//structural constituent of nuclear pore	GO:0006913//nucleocytoplasmic transport
Os02g0718100	0	0	4	106	82	81	0	0	0.19	4.86	3.94	4.7	0.0633333	4.5	6.15082	2.55849e-07	7.59042e-06	OsAGP22	Non-protein coding transcript	-	-	-	-	-	-	-
Os07g0617700	113	69	79	45	29	36	2.41	1.35	1.63	0.88	0.6	0.9	1.79667	0.793333	-1.17932	2.5862e-07	7.65323e-06	OsFbox397	Cyclin-like F-box domain containing protein	-	-	-	-	-	GO:0004842//ubiquitin-protein transferase activity;GO:0005515//protein binding	GO:0016567//protein ubiquitination;GO:0031146//SCF-dependent proteasomal ubiquitin-dependent protein catabolic process
Os12g0556500	4	0	6	97	79	96	0.05	0	0.07	1.14	0.98	1.43	0.04	1.18333	4.88671	2.60418e-07	7.69504e-06	-	Calmodulin binding protein-like family protein	-	-	-	-	GO:0005634//nucleus	GO:0003700//transcription factor activity, sequence-specific DNA binding;GO:0005516//calmodulin binding;GO:0043565//sequence-specific DNA binding	GO:0006355//regulation of transcription, DNA-templated;GO:0080142//regulation of salicylic acid biosynthetic process
Os01g0785700	24	22	18	255	292	191	0.4	0.34	0.26	3.84	4.52	3.63	0.333333	3.99667	3.58376	2.61209e-07	7.70703e-06	-	Pentatricopeptide repeat domain containing protein	-	-	-	-	-	GO:0005515//protein binding	-
Os05g0572000	125	47	62	35	24	29	2.98	1.03	1.43	0.77	0.55	0.81	1.81333	0.71	-1.35275	2.62154e-07	7.72348e-06	OsERF#052	Pathogenesis-related transcriptional factor and ERF domain containing protein	-	-	-	-	GO:0005634//nucleus	GO:0003677//DNA binding;GO:0003700//transcription factor activity, sequence-specific DNA binding	GO:0006355//regulation of transcription, DNA-templated;GO:0010200//response to chitin
MSTRG.5912	0	0	0	104	17	123	0	0	0	1.7	0.3	2.55	0.001	1.51667	10.5667	2.62866e-07	7.73305e-06	GSTU6	probable glutathione S-transferase GSTU6 [Oryza sativa Japonica Group]	Metabolism;Metabolism	Global and overview maps;Metabolism of other amino acids	ko01100//Metabolic pathways;ko00480//Glutathione metabolism	K00799;K00799	GO:0044424//intracellular part	GO:0016765//transferase activity, transferring alkyl or aryl (other than methyl) groups	-
Os01g0933900	36	6	37	241	266	209	1.2	0.19	1.22	7.54	8.71	8.19	0.87	8.14667	3.22712	2.665e-07	7.82843e-06	OsGSTF4	Similar to Glutathione transferase III(B) (EC 2.5.1.18)	Metabolism;Metabolism	Global and overview maps;Metabolism of other amino acids	ko01100//Metabolic pathways;ko00480//Glutathione metabolism	K00799;K00799	GO:0005737//cytoplasm	GO:0004364//glutathione transferase activity;GO:0005515//protein binding;GO:0043295//glutathione binding	GO:0006749//glutathione metabolic process
Os11g0134500	34	14	17	180	223	174	0.58	0.23	0.28	2.85	3.7	3.49	0.363333	3.34667	3.20336	2.71521e-07	7.95585e-06	OsWD40-182	WD40 repeat-like domain containing protein	-	-	-	-	GO:0005634//nucleus	GO:0005515//protein binding	-
Os03g0833700	7	2	11	161	107	90	0.15	0.04	0.22	2.95	2.05	2.09	0.136667	2.36333	4.11209	2.71634e-07	7.95585e-06	-	RNA 3'-terminal phosphate cyclase family protein	Genetic Information Processing	Translation	ko03008//Ribosome biogenesis in eukaryotes	K11108	GO:0005730//nucleolus	GO:0003824//catalytic activity;GO:0004521//endoribonuclease activity	GO:0000479//endonucleolytic cleavage of tricistronic rRNA transcript (SSU-rRNA, 5.8S rRNA, LSU-rRNA);GO:0006396//RNA processing;GO:0042254//ribosome biogenesis
Os04g0376500	32	24	32	247	305	208	0.82	0.56	0.79	5.78	7.37	6.17	0.723333	6.44	3.15433	2.75444e-07	8.05561e-06	eIF-3h	Similar to Eukaryotic translation initiation factor 3 subunit 3 (eIF-3 gamma) (eIF3 p38 subunit) (eIF3h)	Genetic Information Processing	Translation	ko03013//RNA transport	K03247	GO:0005737//cytoplasm;GO:0005829//cytosol;GO:0005852//eukaryotic translation initiation factor 3 complex;GO:0016282//eukaryotic 43S preinitiation complex;GO:0033290//eukaryotic 48S preinitiation complex;GO:0042788//polysomal ribosome	GO:0003743//translation initiation factor activity;GO:0005515//protein binding;GO:0008237//metallopeptidase activity	GO:0001732//formation of cytoplasmic translation initiation complex;GO:0002183//cytoplasmic translational initiation;GO:0006412//translation;GO:0006413//translational initiation;GO:0006508//proteolysis;GO:0009733//response to auxin;GO:0009737//response to abscisic acid;GO:0009744//response to sucrose;GO:0009749//response to glucose;GO:0034286//response to maltose;GO:0045948//positive regulation o…
Os04g0584600	614	206	517	1960	2164	1684	9.19	2.6	6.83	25.36	28.36	27.7	6.20667	27.14	2.12853	2.76436e-07	8.07283e-06	OsCDPK13	Similar to Calcium dependent protein kinase	Organismal Systems	Environmental adaptation	ko04626//Plant-pathogen interaction	K13412	GO:0005634//nucleus;GO:0005737//cytoplasm;GO:0016020//membrane	GO:0000166//nucleotide binding;GO:0004672//protein kinase activity;GO:0004674//protein serine/threonine kinase activity;GO:0004683//calmodulin-dependent protein kinase activity;GO:0005509//calcium ion binding;GO:0005516//calmodulin binding;GO:0005524//ATP binding;GO:0009931//calcium-dependent protein serine/threonine kinase activity;GO:0016301//kinase activity;GO:0016740//transferase activity;GO:…	GO:0006468//protein phosphorylation;GO:0009409//response to cold;GO:0009414//response to water deprivation;GO:0009738//abscisic acid-activated signaling pathway;GO:0016310//phosphorylation;GO:0018105//peptidyl-serine phosphorylation;GO:0035556//intracellular signal transduction;GO:0046777//protein autophosphorylation;GO:1901002//positive regulation of response to salt stress
Os02g0559800	10	2	3	109	86	102	0.22	0.04	0.06	2.36	1.95	2.8	0.106667	2.37	4.47371	2.99185e-07	8.62369e-06	EL5	RING-H2 type E3 ubiquitin ligase, Root development, Maintenance of cell viability after the initiation of root primordial formation, Defense respons	-	-	-	-	GO:0005886//plasma membrane;GO:0016020//membrane;GO:0016021//integral component of membrane	GO:0004842//ubiquitin-protein transferase activity;GO:0016740//transferase activity;GO:0046872//metal ion binding;GO:0061630//ubiquitin protein ligase activity	GO:0006511//ubiquitin-dependent protein catabolic process;GO:0016567//protein ubiquitination;GO:0048364//root development;GO:0051301//cell division
Os02g0560200	10	2	3	109	86	102	0.22	0.04	0.06	2.36	1.95	2.8	0.106667	2.37	4.47371	2.99185e-07	8.62369e-06	EL5	RING-H2 type E3 ubiquitin ligase, Root development, Maintenance of cell viability after the initiation of root primordial formation, Defense respons	-	-	-	-	GO:0005886//plasma membrane;GO:0016020//membrane;GO:0016021//integral component of membrane	GO:0004842//ubiquitin-protein transferase activity;GO:0016740//transferase activity;GO:0046872//metal ion binding;GO:0061630//ubiquitin protein ligase activity	GO:0006511//ubiquitin-dependent protein catabolic process;GO:0016567//protein ubiquitination;GO:0048364//root development;GO:0051301//cell division
Os02g0560600	10	2	3	109	86	102	0.22	0.04	0.06	2.36	1.95	2.8	0.106667	2.37	4.47371	2.99185e-07	8.62369e-06	EL5	RING-H2 type E3 ubiquitin ligase, Root development, Maintenance of cell viability after the initiation of root primordial formation, Defense respons	-	-	-	-	GO:0005886//plasma membrane;GO:0016020//membrane;GO:0016021//integral component of membrane	GO:0004842//ubiquitin-protein transferase activity;GO:0016740//transferase activity;GO:0046872//metal ion binding;GO:0061630//ubiquitin protein ligase activity	GO:0006511//ubiquitin-dependent protein catabolic process;GO:0016567//protein ubiquitination;GO:0048364//root development;GO:0051301//cell division
Os02g0561000	10	2	3	109	86	102	0.22	0.04	0.06	2.36	1.95	2.8	0.106667	2.37	4.47371	2.99185e-07	8.62369e-06	EL5	RING-H2 type E3 ubiquitin ligase, Root development, Maintenance of cell viability after the initiation of root primordial formation, Defense respons	-	-	-	-	GO:0005886//plasma membrane;GO:0016020//membrane;GO:0016021//integral component of membrane	GO:0004842//ubiquitin-protein transferase activity;GO:0016740//transferase activity;GO:0046872//metal ion binding;GO:0061630//ubiquitin protein ligase activity	GO:0006511//ubiquitin-dependent protein catabolic process;GO:0016567//protein ubiquitination;GO:0048364//root development;GO:0051301//cell division
Os02g0561400	10	2	3	109	86	102	0.22	0.04	0.06	2.36	1.95	2.8	0.106667	2.37	4.47371	2.99185e-07	8.62369e-06	EL5	RING-H2 type E3 ubiquitin ligase, Root development, Maintenance of cell viability after the initiation of root primordial formation, Defense respons	-	-	-	-	GO:0005886//plasma membrane;GO:0016020//membrane;GO:0016021//integral component of membrane	GO:0004842//ubiquitin-protein transferase activity;GO:0016740//transferase activity;GO:0046872//metal ion binding;GO:0061630//ubiquitin protein ligase activity	GO:0006511//ubiquitin-dependent protein catabolic process;GO:0016567//protein ubiquitination;GO:0048364//root development;GO:0051301//cell division
Os02g0561800	10	2	3	109	86	102	0.22	0.04	0.06	2.36	1.95	2.8	0.106667	2.37	4.47371	2.99185e-07	8.62369e-06	EL5	RING-H2 type E3 ubiquitin ligase, Root development, Maintenance of cell viability after the initiation of root primordial formation, Defense respons	-	-	-	-	GO:0005886//plasma membrane;GO:0016020//membrane;GO:0016021//integral component of membrane	GO:0004842//ubiquitin-protein transferase activity;GO:0016740//transferase activity;GO:0046872//metal ion binding;GO:0061630//ubiquitin protein ligase activity	GO:0006511//ubiquitin-dependent protein catabolic process;GO:0016567//protein ubiquitination;GO:0048364//root development;GO:0051301//cell division
MSTRG.1446	354	196	241	104	34	132	0.96	0.49	0.63	0.26	0.09	0.42	0.693333	0.256667	-1.43365	3.01387e-07	8.67464e-06	RE2	hypothetical polyprotein [Oryza sativa Japonica Group]	-	-	-	-	-	-	-
Os04g0205200	5	1	15	183	161	102	0.08	0.02	0.25	2.92	2.69	2.05	0.116667	2.55333	4.45192	3.04976e-07	8.76532e-06	-	NB-ARC domain containing protein	-	-	-	-	-	-	-
Os02g0807000	8	3	10	123	186	72	0.18	0.06	0.22	2.6	4.12	1.93	0.153333	2.88333	4.23299	3.12409e-07	8.96604e-06	OsPPCK1	Similar to Phosphoenolpyruvate carboxylase kinase 1	-	-	-	-	GO:0005634//nucleus;GO:0005737//cytoplasm	GO:0000166//nucleotide binding;GO:0004672//protein kinase activity;GO:0004674//protein serine/threonine kinase activity;GO:0004683//calmodulin-dependent protein kinase activity;GO:0005516//calmodulin binding;GO:0005524//ATP binding;GO:0009931//calcium-dependent protein serine/threonine kinase activity	GO:0006468//protein phosphorylation;GO:0009738//abscisic acid-activated signaling pathway;GO:0018105//peptidyl-serine phosphorylation;GO:0035556//intracellular signal transduction;GO:0046777//protein autophosphorylation
Os05g0353400	30	0	45	416	617	436	0.28	0	0.49	3.76	5.61	5.02	0.256667	4.79667	4.22406	3.15464e-07	9.01488e-06	OsImpbeta1	Armadillo-like helical domain containing protein	Genetic Information Processing	Translation	ko03013//RNA transport	K14293	GO:0005623//cell;GO:0005634//nucleus;GO:0005737//cytoplasm;GO:0031965//nuclear membrane;GO:0034399//nuclear periphery	GO:0008139//nuclear localization sequence binding;GO:0008536//Ran GTPase binding;GO:0008565//protein transporter activity;GO:0061608//nuclear import signal receptor activity	GO:0006606//protein import into nucleus;GO:0006607//NLS-bearing protein import into nucleus;GO:0006610//ribosomal protein import into nucleus;GO:0006886//intracellular protein transport
Os02g0831800	67	58	69	524	768	418	1.35	1.07	1.35	9.73	14.94	9.82	1.25667	11.4967	3.19354	3.17848e-07	9.07003e-06	-	Similar to 3-hydroxy-3-methylglutaryl-coenzyme A reductase 2	Metabolism;Metabolism;Metabolism;Metabolism	Global and overview maps;Global and overview maps;Global and overview maps;Amino acid metabolism	ko01100//Metabolic pathways;ko01110//Biosynthesis of secondary metabolites;ko01230//Biosynthesis of amino acids;ko00260//Glycine, serine and threonine metabolism	K00872;K00872;K00872;K00872	GO:0009507//chloroplast;GO:0009570//chloroplast stroma	GO:0004413//homoserine kinase activity;GO:0005524//ATP binding	GO:0006566//threonine metabolic process;GO:0009617//response to bacterium;GO:0009620//response to fungus;GO:0016310//phosphorylation
Os02g0712700	5	0	1	94	76	78	0.06	0	0.01	0.98	0.83	1.03	0.0233333	0.946667	5.34239	3.25561e-07	9.26365e-06	-	Concanavalin A-like lectin/glucanase domain containing protein	-	-	-	-	GO:0005886//plasma membrane;GO:0016021//integral component of membrane	GO:0004672//protein kinase activity;GO:0004675//transmembrane receptor protein serine/threonine kinase activity;GO:0005524//ATP binding;GO:0030246//carbohydrate binding	GO:0002229//defense response to oomycetes;GO:0006468//protein phosphorylation;GO:0006952//defense response;GO:0042742//defense response to bacterium
Os08g0295300	50	25	24	279	347	231	0.73	0.41	0.28	3.62	4.76	3.6	0.473333	3.99333	3.07667	3.29192e-07	9.34036e-06	-	Similar to Threonyl-tRNA synthetase, cytoplasmic (EC 6.1.1.3) (Threonine--tRNA ligase) (ThrRS)	Genetic Information Processing	Translation	ko00970//Aminoacyl-tRNA biosynthesis	K01868	GO:0005737//cytoplasm;GO:0005739//mitochondrion;GO:0009507//chloroplast	GO:0000166//nucleotide binding;GO:0004812//aminoacyl-tRNA ligase activity;GO:0004829//threonine-tRNA ligase activity;GO:0005524//ATP binding	GO:0006418//tRNA aminoacylation for protein translation;GO:0006435//threonyl-tRNA aminoacylation;GO:0043039//tRNA aminoacylation
Os10g0509700	6	5	9	99	136	91	0.14	0.11	0.2	2.11	3.03	2.45	0.15	2.53	4.0761	3.31802e-07	9.40105e-06	-	Hypothetical gene	-	-	-	-	GO:0016020//membrane;GO:0016021//integral component of membrane	-	-
Os10g0513200	766	226	419	146	47	227	9.91	2.68	5.24	1.74	0.59	3.42	5.94333	1.91667	-1.63267	3.35563e-07	9.49416e-06	NIP3	Boric acid channel, Regulation of boron distributio	-	-	-	-	GO:0016020//membrane;GO:0016021//integral component of membrane	GO:0015267//channel activity	GO:0055085//transmembrane transport
Os09g0339000	50	4	93	650	1169	536	0.68	0.05	1.22	8.12	15.31	8.48	0.65	10.6367	4.03246	3.41066e-07	9.6362e-06	-	Protein kinase, core domain containing protein	-	-	-	-	GO:0005886//plasma membrane;GO:0016020//membrane;GO:0016021//integral component of membrane	GO:0004672//protein kinase activity;GO:0004675//transmembrane receptor protein serine/threonine kinase activity;GO:0005524//ATP binding	GO:0002229//defense response to oomycetes;GO:0006468//protein phosphorylation;GO:0006952//defense response;GO:0007178//transmembrane receptor protein serine/threonine kinase signaling pathway;GO:0042742//defense response to bacterium
Os11g0540600	0	0	1	76	154	52	0	0	0.02	1.31	2.79	1.14	0.00666667	1.74667	8.03342	3.41707e-07	9.64067e-06	-	Protein of unknown function DUF247, plant family protein	-	-	-	-	GO:0016020//membrane;GO:0016021//integral component of membrane	-	-
Os02g0646200	6	4	10	94	444	83	0.15	0.09	0.24	2.15	10.62	2.4	0.16	5.05667	4.98204	3.44296e-07	9.70001e-06	OsBBX6	Zinc finger, B-box domain containing protein	-	-	-	-	GO:0005634//nucleus	GO:0008270//zinc ion binding	GO:0006355//regulation of transcription, DNA-templated;GO:0009640//photomorphogenesis
Os04g0419700	236	120	177	45	59	120	2.82	1.32	2.05	0.5	0.68	1.67	2.06333	0.95	-1.11898	3.4781e-07	9.78522e-06	-	Similar to H0525E10.7 protein	-	-	-	-	GO:0005886//plasma membrane;GO:0016021//integral component of membrane	GO:0000166//nucleotide binding;GO:0004672//protein kinase activity;GO:0004674//protein serine/threonine kinase activity;GO:0005524//ATP binding;GO:0016301//kinase activity;GO:0016740//transferase activity	GO:0006468//protein phosphorylation;GO:0016310//phosphorylation;GO:0048544//recognition of pollen
Os06g0141200	450	175	316	45	7	108	15.03	5.36	10.19	1.38	0.23	4.21	10.1933	1.94	-2.3935	3.52411e-07	9.90072e-06	OsZFP1	Similar to RNA-binding protein EWS	-	-	-	-	-	GO:0046872//metal ion binding	-
Os02g0109100	41	10	17	167	322	204	0.77	0.17	0.32	2.92	5.88	4.5	0.42	4.43333	3.39993	3.54803e-07	9.95391e-06	-	Similar to diphosphomevalonate decarboxylase	Metabolism;Metabolism;Metabolism	Global and overview maps;Global and overview maps;Metabolism of terpenoids and polyketides	ko01100//Metabolic pathways;ko01110//Biosynthesis of secondary metabolites;ko00900//Terpenoid backbone biosynthesis	K01597;K01597;K01597	GO:0005829//cytosol	GO:0000166//nucleotide binding;GO:0004163//diphosphomevalonate decarboxylase activity;GO:0005524//ATP binding;GO:0016829//lyase activity;GO:0016831//carboxy-lyase activity	GO:0006629//lipid metabolic process;GO:0006694//steroid biosynthetic process;GO:0008202//steroid metabolic process;GO:0008299//isoprenoid biosynthetic process;GO:0016126//sterol biosynthetic process;GO:0019287//isopentenyl diphosphate biosynthetic process, mevalonate pathway
Os08g0487800	28	6	63	357	490	335	0.31	0.06	0.67	3.62	5.2	4.3	0.346667	4.37333	3.65711	3.57753e-07	1.00226e-05	-	Similar to Heat-shock protein precursor	Organismal Systems;Genetic Information Processing	Environmental adaptation;Folding, sorting and degradation	ko04626//Plant-pathogen interaction;ko04141//Protein processing in endoplasmic reticulum	K09487;K09487	GO:0005783//endoplasmic reticulum;GO:0009570//chloroplast stroma;GO:0048471//perinuclear region of cytoplasm	GO:0005524//ATP binding;GO:0051082//unfolded protein binding	GO:0006457//protein folding
MSTRG.19168	0	0	3	67	141	69	0	0	0.02	0.52	1.14	0.67	0.00666667	0.776667	6.86419	3.65665e-07	1.02299e-05	RGA2	OSJNBa0084K20.16 [Oryza sativa Japonica Group]	-	-	-	-	-	-	-
Os02g0465400	283	146	206	1070	1153	960	4.4	2.08	3.1	15.3	17.28	17.38	3.19333	16.6533	2.38268	3.73762e-07	1.04335e-05	-	Similar to 7-dehydrocholesterol reductase (EC 1.3.1.21) (7-DHC reductase) (Sterol delta-7-reductase) (Dwarf5 protein)	Metabolism;Metabolism;Metabolism	Global and overview maps;Global and overview maps;Lipid metabolism	ko01100//Metabolic pathways;ko01110//Biosynthesis of secondary metabolites;ko00100//Steroid biosynthesis	K00213;K00213;K00213	GO:0005794//Golgi apparatus;GO:0005886//plasma membrane;GO:0016020//membrane;GO:0030176//integral component of endoplasmic reticulum membrane	GO:0009918//sterol delta7 reductase activity;GO:0016627//oxidoreductase activity, acting on the CH-CH group of donors;GO:0016628//oxidoreductase activity, acting on the CH-CH group of donors, NAD or NADP as acceptor	GO:0016126//sterol biosynthetic process;GO:0016132//brassinosteroid biosynthetic process;GO:0055114//oxidation-reduction process
Os02g0712600	0	0	0	31	127	46	0	0	0	0.34	1.47	0.64	0.001	0.816667	9.6736	3.74919e-07	1.04335e-05	-	Concanavalin A-like lectin/glucanase domain containing protein	-	-	-	-	GO:0005886//plasma membrane;GO:0016021//integral component of membrane	GO:0004672//protein kinase activity;GO:0004675//transmembrane receptor protein serine/threonine kinase activity;GO:0005524//ATP binding;GO:0030246//carbohydrate binding	GO:0002229//defense response to oomycetes;GO:0006468//protein phosphorylation;GO:0006952//defense response;GO:0042742//defense response to bacterium
Os02g0571900	6	1	16	166	97	255	0.11	0.02	0.28	2.77	1.69	5.38	0.136667	3.28	4.58496	3.75033e-07	1.04335e-05	CYP76M6	Cytochrome P450 family protein	Metabolism;Metabolism	Global and overview maps;Metabolism of terpenoids and polyketides	ko01110//Biosynthesis of secondary metabolites;ko00904//Diterpenoid biosynthesis	K21718;K21718	GO:0016020//membrane;GO:0016021//integral component of membrane	GO:0004497//monooxygenase activity;GO:0005506//iron ion binding;GO:0016491//oxidoreductase activity;GO:0016705//oxidoreductase activity, acting on paired donors, with incorporation or reduction of molecular oxygen;GO:0016709//oxidoreductase activity, acting on paired donors, with incorporation or reduction of molecular oxygen, NAD(P)H as one donor, and incorporation of one atom of oxygen;GO:00200…	GO:0006952//defense response;GO:0016102//diterpenoid biosynthetic process;GO:0051502//diterpene phytoalexin biosynthetic process;GO:0055114//oxidation-reduction process
Os02g0618250	19	6	21	145	190	127	0.86	0.25	0.92	6.06	8.33	6.72	0.676667	7.03667	3.37837	3.88214e-07	1.07553e-05	-	Similar to H/ACA ribonucleoprotein complex subunit 3-like protein	Genetic Information Processing	Translation	ko03008//Ribosome biogenesis in eukaryotes	K11130	GO:0005730//nucleolus;GO:0015030//Cajal body;GO:0031429//box H/ACA snoRNP complex;GO:0090661//box H/ACA telomerase RNP complex	GO:0030515//snoRNA binding;GO:0034513//box H/ACA snoRNA binding;GO:0070034//telomerase RNA binding	GO:0001522//pseudouridine synthesis;GO:0010197//polar nucleus fusion;GO:0031118//rRNA pseudouridine synthesis;GO:0031120//snRNA pseudouridine synthesis;GO:0042254//ribosome biogenesis
Os01g0179600	2642	688	1282	875	310	703	49.09	11.73	23.04	14.97	5.56	15.23	27.9533	11.92	-1.22964	3.91336e-07	1.08268e-05	OsUGT75K1	UDP-glucuronosyl/UDP-glucosyltransferase family protein	-	-	-	-	GO:0043231//intracellular membrane-bounded organelle	GO:0008194//UDP-glycosyltransferase activity;GO:0016740//transferase activity;GO:0016757//transferase activity, transferring glycosyl groups;GO:0016758//transferase activity, transferring hexosyl groups;GO:0080043//quercetin 3-O-glucosyltransferase activity;GO:0080044//quercetin 7-O-glucosyltransferase activity	-
Os09g0555800	0	0	0	118	20	77	0	0	0	1.81	0.32	1.5	0.001	1.21	10.2408	4.07861e-07	1.12218e-05	-	Similar to AMP-binding protein (Adenosine monophosphate binding protein 6 AMPBP6)	-	-	-	-	-	GO:0003824//catalytic activity	-
Os06g0256500	528	225	327	164	68	213	7.6	2.97	4.55	2.17	0.94	3.57	5.04	2.22667	-1.17854	4.08868e-07	1.1234e-05	Pgi2(Pgib)	Similar to Glucose-6-phosphate isomerase	Metabolism;Metabolism;Metabolism;Metabolism;Metabolism;Metabolism;Metabolism	Global and overview maps;Global and overview maps;Global and overview maps;Carbohydrate metabolism;Carbohydrate metabolism;Carbohydrate metabolism;Carbohydrate metabolism	ko01100//Metabolic pathways;ko01110//Biosynthesis of secondary metabolites;ko01200//Carbon metabolism;ko00500//Starch and sucrose metabolism;ko00520//Amino sugar and nucleotide sugar metabolism;ko00010//Glycolysis / Gluconeogenesis;ko00030//Pentose phosphate pathway	K01810;K01810;K01810;K01810;K01810;K01810;K01810	GO:0005829//cytosol	GO:0004347//glucose-6-phosphate isomerase activity;GO:0016853//isomerase activity;GO:0016866//intramolecular transferase activity;GO:0048029//monosaccharide binding	GO:0006094//gluconeogenesis;GO:0006096//glycolytic process;GO:0051156//glucose 6-phosphate metabolic process
Os01g0606000	30	41	17	1	0	3	0.82	1.03	0.45	0.03	0	0.1	0.766667	0.0433333	-4.14505	4.19536e-07	1.14955e-05	OsSWEET6a	MtN3 and saliva related transmembrane protein family protein	-	-	-	-	GO:0005886//plasma membrane;GO:0005887//integral component of plasma membrane;GO:0016020//membrane;GO:0016021//integral component of membrane	GO:0051119//sugar transmembrane transporter activity	GO:0008643//carbohydrate transport;GO:0034219//carbohydrate transmembrane transport
Os01g0846300	1207	518	644	174	81	442	20.29	8	10.52	2.7	1.31	8.67	12.9367	4.22667	-1.61387	4.25692e-07	1.16482e-05	OsPP15	Similar to Protein phosphatase 2C	Environmental Information Processing;Environmental Information Processing	Signal transduction;Signal transduction	ko04075//Plant hormone signal transduction;ko04016//MAPK signaling pathway - plant	K14497;K14497	GO:0005634//nucleus;GO:0005829//cytosol;GO:0016020//membrane;GO:0016021//integral component of membrane	GO:0003824//catalytic activity;GO:0004721//phosphoprotein phosphatase activity;GO:0004722//protein serine/threonine phosphatase activity;GO:0004724//magnesium-dependent protein serine/threonine phosphatase activity;GO:0016787//hydrolase activity;GO:0043169//cation binding;GO:0046872//metal ion binding	GO:0006470//protein dephosphorylation
Os12g0555200	6	7	16	200	98	223	0.22	0.24	0.57	6.79	3.49	9.58	0.343333	6.62	4.26915	4.30302e-07	1.17582e-05	RPR10b	Similar to Probenazole-inducible protein PBZ1	-	-	-	-	GO:0005634//nucleus;GO:0005737//cytoplasm	GO:0004864//protein phosphatase inhibitor activity;GO:0010427//abscisic acid binding;GO:0038023//signaling receptor activity	GO:0006952//defense response;GO:0009738//abscisic acid-activated signaling pathway;GO:0032515//negative regulation of phosphoprotein phosphatase activity;GO:0080163//regulation of protein serine/threonine phosphatase activity
Os07g0631500	0	2	2	95	103	56	0	0.04	0.04	1.68	1.91	1.26	0.0266667	1.61667	5.92184	4.41215e-07	1.20236e-05	-	Similar to Mov34/MPN/PAD-1 family protein	-	-	-	-	-	-	-
Os07g0222300	154	52	127	552	642	480	2.6	0.8	2.14	8.68	10.45	9.43	1.84667	9.52	2.36604	4.46655e-07	1.21552e-05	EIF3E	Eukaryotic translation initiation factor 3 subunit E, Organ growth and pollen developmen	Genetic Information Processing	Translation	ko03013//RNA transport	K03250	GO:0005634//nucleus;GO:0005737//cytoplasm;GO:0005852//eukaryotic translation initiation factor 3 complex;GO:0016282//eukaryotic 43S preinitiation complex;GO:0033290//eukaryotic 48S preinitiation complex;GO:0071540//eukaryotic translation initiation factor 3 complex, eIF3e	GO:0003743//translation initiation factor activity	GO:0001732//formation of cytoplasmic translation initiation complex;GO:0002183//cytoplasmic translational initiation;GO:0006412//translation;GO:0006413//translational initiation
Os03g0656900	6	1	23	151	222	238	0.11	0.02	0.41	2.58	3.98	5.15	0.18	3.90333	4.43864	4.53905e-07	1.23149e-05	NUS1	Plastid RNA-binding protein, Regulation of chloroplast RNA metabolism, Early chloroplast development under cold stres	-	-	-	-	GO:0009507//chloroplast	GO:0003723//RNA binding	GO:0006353//DNA-templated transcription, termination;GO:0006355//regulation of transcription, DNA-templated
Os01g0141000	67	49	253	1528	1751	1007	1.32	0.88	4.81	27.67	33.23	23.09	2.33667	27.9967	3.58273	4.54372e-07	1.23149e-05	AP2/EREBP129	AP2/ERF and B3 domain-containing protein, Salt stress respons	-	-	-	-	GO:0005634//nucleus	GO:0003677//DNA binding;GO:0003700//transcription factor activity, sequence-specific DNA binding	GO:0006355//regulation of transcription, DNA-templated
Os07g0471300	29	17	69	336	348	387	0.34	0.19	0.79	3.67	3.99	5.35	0.44	4.33667	3.30101	4.60203e-07	1.2456e-05	OsAGO18	Similar to Protein argonaute 18	-	-	-	-	-	GO:0003676//nucleic acid binding;GO:0005515//protein binding	GO:0031047//gene silencing by RNA
Os03g0159100	15	18	25	272	188	222	0.31	0.32	0.48	4.97	3.59	5.14	0.37	4.56667	3.62554	4.69937e-07	1.27015e-05	OsRLCK101	Similar to Protein kinase APK1B, chloroplast precursor (EC 2.7.1.-)	-	-	-	-	-	GO:0000166//nucleotide binding;GO:0004672//protein kinase activity;GO:0004674//protein serine/threonine kinase activity;GO:0005524//ATP binding;GO:0016301//kinase activity	GO:0006468//protein phosphorylation;GO:0016310//phosphorylation
Os01g0117600	9	10	35	221	259	254	0.11	0.11	0.43	2.56	3.15	3.73	0.216667	3.14667	3.86028	4.79262e-07	1.2902e-05	-	Protein kinase, catalytic domain domain containing protein	-	-	-	-	-	GO:0004672//protein kinase activity;GO:0005524//ATP binding	GO:0006468//protein phosphorylation
Os10g0439800	2	0	2	96	40	130	0.04	0	0.04	1.67	0.73	2.86	0.0266667	1.75333	6.03892	4.87059e-07	1.30942e-05	Oscyp71Z4	Similar to H0813E03.1 protein	-	-	-	-	GO:0016020//membrane	GO:0004497//monooxygenase activity;GO:0005506//iron ion binding;GO:0016491//oxidoreductase activity;GO:0016705//oxidoreductase activity, acting on paired donors, with incorporation or reduction of molecular oxygen;GO:0016709//oxidoreductase activity, acting on paired donors, with incorporation or reduction of molecular oxygen, NAD(P)H as one donor, and incorporation of one atom of oxygen;GO:00200…	GO:0055114//oxidation-reduction process
Os04g0496600	14	9	38	0	0	0	0.23	0.13	0.59	0	0	0	0.316667	0.001	-8.30682	5.27028e-07	1.4074e-05	-	Similar to H0306B06.6 protein	-	-	-	-	GO:0016020//membrane;GO:0016021//integral component of membrane	-	-
MSTRG.8176	0	0	1	111	54	80	0	0	0.08	8.01	4.08	7.31	0.0266667	6.46667	7.92184	5.27862e-07	1.40775e-05	--	Os11g0691290 [Oryza sativa Japonica Group]	-	-	-	-	-	GO:0016301//kinase activity	-
Os01g0615200	134	32	79	480	552	411	2.46	0.54	1.4	8.12	9.78	8.8	1.46667	8.9	2.60126	5.2939e-07	1.40994e-05	OsAT2	Transferase family protein	-	-	-	-	-	GO:0016410//N-acyltransferase activity;GO:0016747//transferase activity, transferring acyl groups other than amino-acyl groups	-
Os02g0523500	281	150	213	1134	1439	941	2.35	1.15	1.72	8.74	11.63	9.18	1.74	9.85	2.50104	5.33455e-07	1.41888e-05	OsTSN	RNA-binding protein, Transport and localization of storage protein mRNAs, Modulation of gene expressio	-	-	-	-	GO:0005634//nucleus;GO:0005737//cytoplasm;GO:0016442//RISC complex	GO:0003723//RNA binding;GO:0004518//nuclease activity	GO:0006401//RNA catabolic process;GO:0031047//gene silencing by RNA;GO:0090305//nucleic acid phosphodiester bond hydrolysis
Os11g0594000	3	0	12	134	158	104	0.05	0	0.19	1.99	2.47	1.96	0.08	2.14	4.74147	5.34246e-07	1.41909e-05	-	Sugar/inositol transporter domain containing protein	-	-	-	-	GO:0005887//integral component of plasma membrane;GO:0016020//membrane;GO:0016021//integral component of membrane	GO:0005351//sugar:proton symporter activity;GO:0022857//transmembrane transporter activity	GO:0008643//carbohydrate transport;GO:0046323//glucose import;GO:0055085//transmembrane transport;GO:1902600//hydrogen ion transmembrane transport
Os04g0209300	190	64	194	923	664	859	1.14	0.35	1.12	5.08	3.83	5.99	0.87	4.96667	2.51319	5.35367e-07	1.42018e-05	OsABCC10	Similar to Glutathione-conjugate transporter AtMRP4	Environmental Information Processing	Membrane transport	ko02010//ABC transporters	K05665	GO:0000325//plant-type vacuole;GO:0005774//vacuolar membrane;GO:0016020//membrane;GO:0016021//integral component of membrane	GO:0000166//nucleotide binding;GO:0005524//ATP binding;GO:0016887//ATPase activity;GO:0042626//ATPase activity, coupled to transmembrane movement of substances	GO:0055085//transmembrane transport
Os03g0700700	241	84	175	931	1213	660	2.48	0.92	1.73	8.77	13.32	7.87	1.71	9.98667	2.54601	5.38539e-07	1.4267e-05	OsLOX1	Similar to Lipoxygenase (Fragment)	Metabolism	Lipid metabolism	ko00591//Linoleic acid metabolism	K15718	-	GO:0005515//protein binding;GO:0016491//oxidoreductase activity;GO:0016702//oxidoreductase activity, acting on single donors with incorporation of molecular oxygen, incorporation of two atoms of oxygen;GO:0046872//metal ion binding;GO:0051213//dioxygenase activity	GO:0006629//lipid metabolic process;GO:0006631//fatty acid metabolic process;GO:0006633//fatty acid biosynthetic process;GO:0031408//oxylipin biosynthetic process;GO:0034440//lipid oxidation;GO:0055114//oxidation-reduction process
Os05g0541900	6	2	10	114	117	78	0.07	0.03	0.13	1.3	1.39	1.12	0.0766667	1.27	4.05009	5.49403e-07	1.45355e-05	-	Similar to 60S ribosomal protein l28	Genetic Information Processing	Translation	ko03010//Ribosome	K02903	GO:0005840//ribosome;GO:0022625//cytosolic large ribosomal subunit	GO:0003735//structural constituent of ribosome	GO:0006412//translation
Os11g0151300	55	26	84	332	515	354	2.08	0.9	3.07	11.55	18.78	15.59	2.01667	15.3067	2.92412	5.52733e-07	1.45759e-05	OsRPL26.1	Similar to 60S ribosomal protein L26-1	Genetic Information Processing	Translation	ko03010//Ribosome	K02898	GO:0005840//ribosome;GO:0015934//large ribosomal subunit;GO:0022625//cytosolic large ribosomal subunit	GO:0003723//RNA binding;GO:0003735//structural constituent of ribosome	GO:0002181//cytoplasmic translation;GO:0006412//translation;GO:0042273//ribosomal large subunit biogenesis
Os02g0241100	59	14	30	273	243	238	0.69	0.15	0.34	2.94	2.74	3.24	0.393333	2.97333	2.91826	5.53e-07	1.45759e-05	-	Protein kinase, core domain containing protein	-	-	-	-	GO:0016020//membrane;GO:0016021//integral component of membrane	GO:0004672//protein kinase activity;GO:0005524//ATP binding	GO:0006468//protein phosphorylation
Os05g0104800	136	30	111	525	579	496	3.74	0.76	2.95	13.28	15.35	15.88	2.48333	14.8367	2.57882	5.54162e-07	1.45842e-05	EIF3F	Eukaryotic translation initiation factor 3 subunit f, Microgametogenesi	Genetic Information Processing	Translation	ko03013//RNA transport	K03249	GO:0000502//proteasome complex;GO:0005634//nucleus;GO:0005737//cytoplasm;GO:0005829//cytosol;GO:0005852//eukaryotic translation initiation factor 3 complex;GO:0016020//membrane;GO:0016282//eukaryotic 43S preinitiation complex;GO:0033290//eukaryotic 48S preinitiation complex;GO:0071541//eukaryotic translation initiation factor 3 complex, eIF3m	GO:0003743//translation initiation factor activity;GO:0005515//protein binding;GO:0031369//translation initiation factor binding	GO:0001732//formation of cytoplasmic translation initiation complex;GO:0002183//cytoplasmic translational initiation;GO:0006412//translation;GO:0006413//translational initiation;GO:0009744//response to sucrose;GO:0009793//embryo development ending in seed dormancy;GO:0009846//pollen germination
Os04g0514600	4	0	6	102	80	79	0.04	0	0.06	0.96	0.79	0.94	0.0333333	0.896667	4.74953	5.61119e-07	1.47478e-05	-	Similar to NBS-LRR type disease resistance protein O2 (Fragment)	Organismal Systems	Environmental adaptation	ko04626//Plant-pathogen interaction	K13459	-	GO:0043531//ADP binding	-
Os06g0593800	1841	670	1002	605	234	699	32.87	10.98	17.31	9.95	4.03	14.55	20.3867	9.51	-1.10011	5.65164e-07	1.48152e-05	-	UDP-glucuronosyl/UDP-glucosyltransferase family protein	-	-	-	-	GO:0043231//intracellular membrane-bounded organelle	GO:0008194//UDP-glycosyltransferase activity;GO:0016740//transferase activity;GO:0016757//transferase activity, transferring glycosyl groups;GO:0016758//transferase activity, transferring hexosyl groups;GO:0080043//quercetin 3-O-glucosyltransferase activity;GO:0080044//quercetin 7-O-glucosyltransferase activity	-
Os01g0787600	2	3	5	90	159	58	0.06	0.08	0.13	2.29	4.25	1.87	0.09	2.80333	4.96107	5.77761e-07	1.5086e-05	OsPOP4	Similar to Salicylic acid-binding protein 2	-	-	-	-	-	GO:0016787//hydrolase activity;GO:0080030//methyl indole-3-acetate esterase activity;GO:0080031//methyl salicylate esterase activity;GO:0080032//methyl jasmonate esterase activity	GO:0009694//jasmonic acid metabolic process;GO:0009696//salicylic acid metabolic process
Os01g0327400	68	30	69	281	463	327	1.5	0.61	1.47	5.7	9.84	8.39	1.19333	7.97667	2.74079	5.85635e-07	1.52716e-05	prx16	Similar to Peroxidase (Fragment)	Metabolism;Metabolism;Metabolism	Global and overview maps;Global and overview maps;Biosynthesis of other secondary metabolites	ko01100//Metabolic pathways;ko01110//Biosynthesis of secondary metabolites;ko00940//Phenylpropanoid biosynthesis	K00430;K00430;K00430	GO:0005576//extracellular region;GO:0009505//plant-type cell wall;GO:0009506//plasmodesma	GO:0004601//peroxidase activity;GO:0016491//oxidoreductase activity;GO:0020037//heme binding;GO:0046872//metal ion binding	GO:0006979//response to oxidative stress;GO:0042744//hydrogen peroxide catabolic process;GO:0055114//oxidation-reduction process;GO:0098869//cellular oxidant detoxification
Os03g0313600	68	16	83	403	472	344	0.97	0.21	1.14	5.28	6.48	5.7	0.773333	5.82	2.91186	5.89395e-07	1.53496e-05	-	Similar to Genes for GrpE, DnaK and DnaJ, complete and partial cds. (Fragment)	Metabolism;Metabolism;Metabolism;Metabolism	Global and overview maps;Global and overview maps;Nucleotide metabolism;Amino acid metabolism	ko01100//Metabolic pathways;ko01110//Biosynthesis of secondary metabolites;ko00230//Purine metabolism;ko00250//Alanine, aspartate and glutamate metabolism	K01756;K01756;K01756;K01756	-	GO:0003824//catalytic activity;GO:0004018//N6-(1,2-dicarboxyethyl)AMP AMP-lyase (fumarate-forming) activity;GO:0016829//lyase activity;GO:0070626//(S)-2-(5-amino-1-(5-phospho-D-ribosyl)imidazole-4-carboxamido)succinate AMP-lyase (fumarate-forming) activity	GO:0006164//purine nucleotide biosynthetic process;GO:0006188//IMP biosynthetic process;GO:0006189//'de novo' IMP biosynthetic process;GO:0009152//purine ribonucleotide biosynthetic process;GO:0044208//'de novo' AMP biosynthetic process
Os10g0485300	151	56	127	23	45	64	1.53	0.52	1.25	0.21	0.44	0.76	1.1	0.47	-1.22677	5.96719e-07	1.55201e-05	-	Hypothetical conserved gene	-	-	-	-	GO:0009507//chloroplast;GO:0009536//plastid;GO:0042651//thylakoid membrane	-	GO:0000304//response to singlet oxygen
Os05g0414700	250	121	213	818	885	897	3.05	1.36	2.51	9.19	10.43	12.76	2.30667	10.7933	2.22626	6.10066e-07	1.58466e-05	-	Similar to BRASSINOSTEROID INSENSITIVE 1-associated receptor kinase 1	-	-	-	-	GO:0016021//integral component of membrane	GO:0004672//protein kinase activity;GO:0005515//protein binding;GO:0005524//ATP binding	GO:0006468//protein phosphorylation
Os04g0517100	37	8	13	335	166	185	0.65	0.12	0.23	5.8	3.42	4.48	0.333333	4.56667	3.7761	6.29744e-07	1.62942e-05	OsMyb4	Similar to OSIGBa0145M07.4 protein	-	-	-	-	GO:0005634//nucleus	GO:0003677//DNA binding;GO:0003700//transcription factor activity, sequence-specific DNA binding;GO:0043565//sequence-specific DNA binding;GO:0044212//transcription regulatory region DNA binding	GO:0009409//response to cold;GO:0030154//cell differentiation;GO:0045893//positive regulation of transcription, DNA-templated
Os10g0107600	11	3	2	98	121	91	0.08	0.02	0.02	0.68	0.87	0.79	0.04	0.78	4.2854	6.35311e-07	1.6417e-05	-	Conserved hypothetical protein	-	-	-	-	-	-	-
Os09g0127800	255	89	186	837	877	701	1.94	0.61	1.44	5.99	6.69	6.21	1.33	6.29667	2.24316	6.6941e-07	1.72305e-05	OsWD40-165	Similar to Coatomer alpha subunit	-	-	-	-	GO:0000139//Golgi membrane;GO:0005737//cytoplasm;GO:0005794//Golgi apparatus;GO:0016020//membrane;GO:0030117//membrane coat;GO:0030126//COPI vesicle coat;GO:0030663//COPI-coated vesicle membrane;GO:0031410//cytoplasmic vesicle	GO:0005198//structural molecule activity;GO:0005515//protein binding	GO:0006886//intracellular protein transport;GO:0006888//ER to Golgi vesicle-mediated transport;GO:0006890//retrograde vesicle-mediated transport, Golgi to ER;GO:0006891//intra-Golgi vesicle-mediated transport;GO:0015031//protein transport;GO:0016192//vesicle-mediated transport
Os07g0280200	312	66	139	18	3	50	5.32	1.04	2.29	0.29	0.04	1	2.88333	0.443333	-2.70127	6.7197e-07	1.72305e-05	OsACS7	AMP-dependent synthetase and ligase domain containing protein	Metabolism;Metabolism;Metabolism;Metabolism	Global and overview maps;Global and overview maps;Biosynthesis of other secondary metabolites;Metabolism of cofactors and vitamins	ko01100//Metabolic pathways;ko01110//Biosynthesis of secondary metabolites;ko00940//Phenylpropanoid biosynthesis;ko00130//Ubiquinone and other terpenoid-quinone biosynthesis	K01904;K01904;K01904;K01904	-	GO:0000166//nucleotide binding;GO:0003824//catalytic activity;GO:0005524//ATP binding;GO:0016874//ligase activity	-
Os01g0714800	0	0	0	57	35	64	0	0	0	1.3	0.84	1.85	0.001	1.33	10.3772	6.8331e-07	1.74541e-05	OsWRKY26	WRKY transcription factor 26	-	-	-	-	GO:0005634//nucleus	GO:0003677//DNA binding;GO:0003700//transcription factor activity, sequence-specific DNA binding;GO:0043565//sequence-specific DNA binding	GO:0006355//regulation of transcription, DNA-templated
Os07g0523300	16	8	24	143	175	144	0.7	0.77	1.52	7.65	9.26	8.86	0.996667	8.59	3.10748	6.92056e-07	1.75876e-05	OsRPL44	Similar to 60S ribosomal protein L44	Genetic Information Processing	Translation	ko03010//Ribosome	K02929	GO:0005840//ribosome	GO:0003735//structural constituent of ribosome	GO:0006412//translation
Os07g0523500	16	8	24	143	175	144	0.7	0.77	1.52	7.65	9.26	8.86	0.996667	8.59	3.10748	6.92056e-07	1.75876e-05	-	Similar to 60S ribosomal protein L44	Genetic Information Processing	Translation	ko03010//Ribosome	K02929	GO:0005840//ribosome	GO:0003735//structural constituent of ribosome	GO:0006412//translation
Os07g0523700	16	8	24	143	175	144	0.7	0.77	1.52	7.65	9.26	8.86	0.996667	8.59	3.10748	6.92056e-07	1.75876e-05	-	Similar to 60S ribosomal protein L44	Genetic Information Processing	Translation	ko03010//Ribosome	K02929	GO:0005840//ribosome	GO:0003735//structural constituent of ribosome	GO:0006412//translation
Os02g0206700	2975	844	1467	553	190	946	50.8	13.23	24.24	8.7	3.13	18.84	29.4233	10.2233	-1.5251	6.96611e-07	1.76743e-05	-	UDP-glucuronosyl/UDP-glucosyltransferase family protein	Metabolism;Metabolism	Global and overview maps;Metabolism of terpenoids and polyketides	ko01110//Biosynthesis of secondary metabolites;ko00908//Zeatin biosynthesis	K13496;K13496	GO:0043231//intracellular membrane-bounded organelle	GO:0008194//UDP-glycosyltransferase activity;GO:0016740//transferase activity;GO:0016757//transferase activity, transferring glycosyl groups;GO:0016758//transferase activity, transferring hexosyl groups;GO:0080043//quercetin 3-O-glucosyltransferase activity;GO:0080044//quercetin 7-O-glucosyltransferase activity	-
Os12g0628100	239	115	170	37	45	114	10.17	4.49	7	1.45	1.85	5.65	7.22	2.98333	-1.27507	6.97238e-07	1.76743e-05	OsADF11	Similar to Actin-depolymerizing factor 6 (ADF-6) (AtADF6)	-	-	-	-	GO:0015629//actin cytoskeleton	GO:0003779//actin binding	GO:0030042//actin filament depolymerization
Os03g0370500	2	0	1	58	140	54	0.03	0	0.01	0.73	1.84	0.86	0.0133333	1.14333	6.42206	7.0482e-07	1.78438e-05	-	Similar to H/ACA ribonucleoprotein complex subunit 4 (EC 5.4.99.-) (Nucleolar protein NAP57 homolog) (Nopp-140 associated protein of 57 kDa homolog) (AtNAP57)	Genetic Information Processing	Translation	ko03008//Ribosome biogenesis in eukaryotes	K11131	GO:0031429//box H/ACA snoRNP complex	GO:0003723//RNA binding;GO:0009982//pseudouridine synthase activity	GO:0000495//box H/ACA snoRNA 3'-end processing;GO:0001522//pseudouridine synthesis;GO:0006396//RNA processing;GO:0009451//RNA modification;GO:0031118//rRNA pseudouridine synthesis;GO:0031120//snRNA pseudouridine synthesis;GO:1990481//mRNA pseudouridine synthesis
MSTRG.21477	823	305	1176	4377	7715	3651	4.05	1.38	5.6	19.86	36.69	20.96	3.67667	25.8367	2.81295	7.09707e-07	1.79448e-05	ACC2	acetyl-CoA carboxylase 2 [Oryza sativa Japonica Group]	Metabolism;Metabolism;Metabolism;Metabolism;Metabolism;Metabolism;Metabolism	Global and overview maps;Global and overview maps;Carbohydrate metabolism;Global and overview maps;Lipid metabolism;Carbohydrate metabolism;Biosynthesis of other secondary metabolites	ko01100//Metabolic pathways;ko01110//Biosynthesis of secondary metabolites;ko00620//Pyruvate metabolism;ko01212//Fatty acid metabolism;ko00061//Fatty acid biosynthesis;ko00640//Propanoate metabolism;ko00254//Aflatoxin biosynthesis	K11262;K11262;K11262;K11262;K11262;K11262;K11262	GO:0016020//membrane;GO:0044444//cytoplasmic part	GO:0016421//CoA carboxylase activity;GO:0016879//ligase activity, forming carbon-nitrogen bonds;GO:0032550//purine ribonucleoside binding;GO:0043169//cation binding	GO:0003006//developmental process involved in reproduction;GO:0006006//glucose metabolic process;GO:0006633//fatty acid biosynthetic process;GO:0006996//organelle organization;GO:0009409//response to cold;GO:0009606//tropism;GO:0009725//response to hormone;GO:0015937//coenzyme A biosynthetic process;GO:0048507//meristem development;GO:0051603//proteolysis involved in cellular protein catabolic pr…
MSTRG.27764	1	1	0	91	111	44	0.02	0.02	0	1.55	1.99	0.94	0.0133333	1.49333	6.80735	7.10937e-07	1.79532e-05	RE2	seryl-tRNA synthetase isoform X1 [Zea mays]	-	-	-	-	-	-	GO:0006259//DNA metabolic process
Os10g0122000	28	3	13	134	190	175	0.55	0.05	0.25	2.42	3.59	4	0.283333	3.33667	3.55784	7.22612e-07	1.81627e-05	-	UDP-glucuronosyl/UDP-glucosyltransferase family protein	-	-	-	-	GO:0043231//intracellular membrane-bounded organelle	GO:0008194//UDP-glycosyltransferase activity;GO:0016740//transferase activity;GO:0016757//transferase activity, transferring glycosyl groups;GO:0016758//transferase activity, transferring hexosyl groups;GO:0080043//quercetin 3-O-glucosyltransferase activity;GO:0080044//quercetin 7-O-glucosyltransferase activity	-
Os01g0194300	35	32	80	495	565	331	0.49	0.41	1.09	6.4	7.66	5.42	0.663333	6.49333	3.29115	7.22872e-07	1.81627e-05	NH1	Ankyrin-repeat protein, Herbivore-induced defense response, Blast disease resistanc	Environmental Information Processing	Signal transduction	ko04075//Plant hormone signal transduction	K14508	GO:0005634//nucleus;GO:0005737//cytoplasm	GO:0005515//protein binding	GO:0001666//response to hypoxia;GO:0006952//defense response;GO:0009408//response to heat;GO:0009611//response to wounding;GO:0009617//response to bacterium;GO:0009625//response to insect;GO:0009627//systemic acquired resistance;GO:0009682//induced systemic resistance;GO:0009862//systemic acquired resistance, salicylic acid mediated signaling pathway;GO:0010112//regulation of systemic acquired re…
Os09g0399800	0	0	4	78	194	52	0	0	0.08	1.52	3.95	1.29	0.0266667	2.25333	6.40088	7.49247e-07	1.87782e-05	OsCAD8A	Cinnamyl alcohol dehydrogenase (EC 1.1.1.195)	Metabolism;Metabolism;Metabolism	Global and overview maps;Global and overview maps;Biosynthesis of other secondary metabolites	ko01100//Metabolic pathways;ko01110//Biosynthesis of secondary metabolites;ko00940//Phenylpropanoid biosynthesis	K00083;K00083;K00083	-	GO:0008270//zinc ion binding;GO:0016491//oxidoreductase activity;GO:0016616//oxidoreductase activity, acting on the CH-OH group of donors, NAD or NADP as acceptor;GO:0045551//cinnamyl-alcohol dehydrogenase activity;GO:0046872//metal ion binding;GO:0052747//sinapyl alcohol dehydrogenase activity	GO:0009699//phenylpropanoid biosynthetic process;GO:0009809//lignin biosynthetic process;GO:0055114//oxidation-reduction process
Os02g0115900	594	113	422	1806	3656	2087	7.31	1.27	5.02	20.46	43.42	29.92	4.53333	31.2667	2.78598	7.53084e-07	1.88311e-05	OsBiP1	Endosperm lumenal binding protein	Genetic Information Processing;Genetic Information Processing	Folding, sorting and degradation;Folding, sorting and degradation	ko04141//Protein processing in endoplasmic reticulum;ko03060//Protein export	K09490;K09490	GO:0005634//nucleus;GO:0005737//cytoplasm;GO:0005783//endoplasmic reticulum;GO:0005788//endoplasmic reticulum lumen;GO:0009705//plant-type vacuole membrane;GO:0016020//membrane;GO:0034663//endoplasmic reticulum chaperone complex	GO:0000166//nucleotide binding;GO:0005515//protein binding;GO:0005524//ATP binding;GO:0016887//ATPase activity;GO:0031072//heat shock protein binding;GO:0042623//ATPase activity, coupled;GO:0044183//protein binding involved in protein folding;GO:0051082//unfolded protein binding;GO:0051787//misfolded protein binding	GO:0006986//response to unfolded protein;GO:0030433//ER-associated ubiquitin-dependent protein catabolic process;GO:0030968//endoplasmic reticulum unfolded protein response;GO:0034605//cellular response to heat;GO:0034620//cellular response to unfolded protein;GO:0034975//protein folding in endoplasmic reticulum;GO:0042026//protein refolding;GO:0051085//chaperone mediated protein folding requirin…
Os05g0169100	722	247	694	2288	2814	2143	23.58	7.41	21.93	68.83	88.73	81.59	17.64	79.7167	2.17603	7.81971e-07	1.94761e-05	-	Similar to 60S ribosomal protein L10 (QM protein homolog)	Genetic Information Processing	Translation	ko03010//Ribosome	K02866	GO:0005840//ribosome;GO:0022625//cytosolic large ribosomal subunit	GO:0003735//structural constituent of ribosome	GO:0000027//ribosomal large subunit assembly;GO:0006412//translation
Os07g0236800	0	0	0	69	105	19	0	0	0	1.81	2.9	0.63	0.001	1.78	10.7977	8.01375e-07	1.99346e-05	-	Snf7 family protein	Cellular Processes	Transport and catabolism	ko04144//Endocytosis	K12191	GO:0000815//ESCRT III complex;GO:0005771//multivesicular body	-	GO:0007034//vacuolar transport;GO:0015031//protein transport;GO:0032509//endosome transport via multivesicular body sorting pathway;GO:0045324//late endosome to vacuole transport
Os06g0267900	18	6	7	81	173	212	0.14	0.04	0.05	0.58	1.29	1.92	0.0766667	1.26333	4.04249	8.26522e-07	2.04836e-05	-	NB-ARC domain containing protein	-	-	-	-	-	GO:0043531//ADP binding	-
Os03g0114800	103	28	95	470	382	464	1.62	0.53	1.74	7.76	6.3	8.84	1.29667	7.63333	2.55751	8.36667e-07	2.07093e-05	-	Protein of unknown function DUF791 family protein	-	-	-	-	GO:0016020//membrane;GO:0016021//integral component of membrane	GO:0015098//molybdate ion transmembrane transporter activity	GO:0015689//molybdate ion transport
Os09g0570100	5	11	31	202	313	297	0.13	0.27	0.68	4.32	7.2	8.68	0.36	6.73333	4.22525	8.49626e-07	2.09781e-05	OsRLCK282	Protein kinase, catalytic domain domain containing protein	-	-	-	-	-	GO:0004672//protein kinase activity;GO:0005524//ATP binding	GO:0006468//protein phosphorylation
Os05g0490100	109	15	167	862	1139	847	5.16	0.65	7.65	37.6	52.07	46.75	4.48667	45.4733	3.3413	8.5534e-07	2.10931e-05	-	Similar to 60S ribosomal protein L30	Genetic Information Processing	Translation	ko03010//Ribosome	K02908	GO:0022625//cytosolic large ribosomal subunit	GO:0003723//RNA binding;GO:0003735//structural constituent of ribosome	GO:0006412//translation
Os01g0185300	500	195	368	1685	2545	1373	9.33	3.34	6.64	28.96	45.85	29.87	6.43667	34.8933	2.43857	8.59162e-07	2.11612e-05	OsAT9	Transferase family protein	-	-	-	-	-	GO:0016410//N-acyltransferase activity;GO:0016740//transferase activity;GO:0016746//transferase activity, transferring acyl groups;GO:0016747//transferase activity, transferring acyl groups other than amino-acyl groups	-
Os08g0154300	99	30	79	377	804	375	1.82	0.48	1.4	6.32	14.18	7.75	1.23333	9.41667	2.93265	8.72611e-07	2.14396e-05	-	Aldolase-type TIM barrel domain containing protein	Metabolism;Metabolism;Metabolism;Metabolism;Metabolism	Global and overview maps;Global and overview maps;Global and overview maps;Global and overview maps;Carbohydrate metabolism	ko01100//Metabolic pathways;ko01110//Biosynthesis of secondary metabolites;ko01200//Carbon metabolism;ko01230//Biosynthesis of amino acids;ko00030//Pentose phosphate pathway	K00616;K00616;K00616;K00616;K00616	GO:0005737//cytoplasm	GO:0003824//catalytic activity;GO:0004801//sedoheptulose-7-phosphate:D-glyceraldehyde-3-phosphate glyceronetransferase activity	GO:0005975//carbohydrate metabolic process;GO:0006098//pentose-phosphate shunt;GO:0009052//pentose-phosphate shunt, non-oxidative branch
Os05g0567400	0	0	0	41	104	30	0	0	0	0.4	1.09	0.38	0.001	0.623333	9.28386	8.91584e-07	2.18789e-05	-	Ribosomal RNA methyltransferase J domain containing protein	-	-	-	-	GO:0005634//nucleus;GO:0005730//nucleolus;GO:0030687//preribosome, large subunit precursor	GO:0008168//methyltransferase activity;GO:0008173//RNA methyltransferase activity;GO:0008649//rRNA methyltransferase activity;GO:0008650//rRNA (uridine-2'-O-)-methyltransferase activity;GO:0016435//rRNA (guanine) methyltransferase activity;GO:0016740//transferase activity	GO:0000453//enzyme-directed rRNA 2'-O-methylation;GO:0000463//maturation of LSU-rRNA from tricistronic rRNA transcript (SSU-rRNA, 5.8S rRNA, LSU-rRNA);GO:0000466//maturation of 5.8S rRNA from tricistronic rRNA transcript (SSU-rRNA, 5.8S rRNA, LSU-rRNA);GO:0001510//RNA methylation;GO:0006364//rRNA processing;GO:0031167//rRNA methylation;GO:0032259//methylation;GO:0042254//ribosome biogenesis
Os04g0206500	0	0	0	42	84	34	0	0	0	0.76	1.58	0.78	0.001	1.04	10.0224	9.05411e-07	2.21909e-05	-	UDP-glucuronosyl/UDP-glucosyltransferase family protein	-	-	-	-	GO:0043231//intracellular membrane-bounded organelle	GO:0008194//UDP-glycosyltransferase activity;GO:0016740//transferase activity;GO:0016757//transferase activity, transferring glycosyl groups;GO:0016758//transferase activity, transferring hexosyl groups;GO:0080043//quercetin 3-O-glucosyltransferase activity;GO:0080044//quercetin 7-O-glucosyltransferase activity	-
Os05g0558400	159	52	117	545	646	461	2.35	0.71	1.67	7.4	9.2	7.93	1.57667	8.17667	2.37464	9.17853e-07	2.24683e-05	-	Similar to Branched-chain-amino-acid aminotransferase 3, chloroplast precursor (EC 2.6.1.42) (Atbcat-3)	Metabolism;Metabolism;Metabolism;Metabolism;Metabolism;Metabolism;Metabolism;Metabolism;Metabolism	Global and overview maps;Global and overview maps;Global and overview maps;Amino acid metabolism;Global and overview maps;Amino acid metabolism;Metabolism of cofactors and vitamins;Amino acid metabolism;Biosynthesis of other secondary metabolites	ko01100//Metabolic pathways;ko01110//Biosynthesis of secondary metabolites;ko01230//Biosynthesis of amino acids;ko00270//Cysteine and methionine metabolism;ko01210//2-Oxocarboxylic acid metabolism;ko00280//Valine, leucine and isoleucine degradation;ko00770//Pantothenate and CoA biosynthesis;ko00290//Valine, leucine and isoleucine biosynthesis;ko00966//Glucosinolate biosynthesis	K00826;K00826;K00826;K00826;K00826;K00826;K00826;K00826;K00826	-	GO:0003824//catalytic activity;GO:0004084//branched-chain-amino-acid transaminase activity;GO:0008483//transaminase activity;GO:0016740//transferase activity;GO:0052654//L-leucine transaminase activity;GO:0052655//L-valine transaminase activity;GO:0052656//L-isoleucine transaminase activity	GO:0008652//cellular amino acid biosynthetic process;GO:0009081//branched-chain amino acid metabolic process;GO:0009082//branched-chain amino acid biosynthetic process
Os06g0708500	133	75	193	813	826	656	3.92	2.03	5.52	22.11	23.45	22.52	3.82333	22.6933	2.56937	9.30837e-07	2.27304e-05	OsCYP20-1	Similar to Peptidyl-prolyl cis-trans isomerase	-	-	-	-	GO:0005768//endosome;GO:0005783//endoplasmic reticulum;GO:0005802//trans-Golgi network;GO:0009506//plasmodesma;GO:0009507//chloroplast	GO:0003755//peptidyl-prolyl cis-trans isomerase activity;GO:0016018//cyclosporin A binding;GO:0016853//isomerase activity;GO:0051082//unfolded protein binding	GO:0000413//protein peptidyl-prolyl isomerization;GO:0006457//protein folding;GO:0042026//protein refolding;GO:0048364//root development
Os03g0333100	12	3	5	75	117	116	0.09	0.02	0.05	0.5	0.82	0.98	0.0533333	0.766667	3.84549	9.33354e-07	2.2764e-05	-	Protein of unknown function DUF663 domain containing protein	Genetic Information Processing	Translation	ko03008//Ribosome biogenesis in eukaryotes	K14569	GO:0005634//nucleus;GO:0030686//90S preribosome	GO:0003924//GTPase activity;GO:0005525//GTP binding;GO:0034511//U3 snoRNA binding	GO:0000462//maturation of SSU-rRNA from tricistronic rRNA transcript (SSU-rRNA, 5.8S rRNA, LSU-rRNA);GO:0000479//endonucleolytic cleavage of tricistronic rRNA transcript (SSU-rRNA, 5.8S rRNA, LSU-rRNA);GO:0042254//ribosome biogenesis
Os10g0531400	85	14	81	447	424	416	2.66	0.4	2.45	12.87	12.79	15.16	1.83667	13.6067	2.88915	9.45536e-07	2.3033e-05	OsGSTU10	Glutathione S-transferase GST 30 (EC 2.5.1.18)	Metabolism;Metabolism	Global and overview maps;Metabolism of other amino acids	ko01100//Metabolic pathways;ko00480//Glutathione metabolism	K00799;K00799	GO:0005737//cytoplasm	GO:0004364//glutathione transferase activity;GO:0005515//protein binding;GO:0016740//transferase activity	GO:0006749//glutathione metabolic process
MSTRG.7572	0	0	0	150	8	97	0	0	0	3.52	0.2	2.88	0.001	2.2	11.1033	9.49352e-07	2.30978e-05	BAK1	leucine-rich repeat protein 1-like [Oryza sativa Japonica Group]	-	-	-	-	GO:0016020//membrane;GO:0032991//macromolecular complex;GO:0043231//intracellular membrane-bounded organelle	GO:0004674//protein serine/threonine kinase activity;GO:0005102//receptor binding	GO:0003006//developmental process involved in reproduction;GO:0006090//pyruvate metabolic process;GO:0006468//protein phosphorylation;GO:0006970//response to osmotic stress;GO:0006996//organelle organization;GO:0007017//microtubule-based process;GO:0007059//chromosome segregation;GO:0009555//pollen development;GO:0009617//response to bacterium;GO:0009790//embryo development;GO:0009814//defense re…
Os03g0376600	13	3	18	156	125	120	0.33	0.07	0.44	3.64	3.05	3.54	0.28	3.41	3.60627	9.94095e-07	2.40692e-05	-	Similar to 29 kDa ribonucleoprotein, chloroplast precursor (RNA-binding protein cp29)	-	-	-	-	GO:0005634//nucleus;GO:0009507//chloroplast;GO:0009535//chloroplast thylakoid membrane;GO:1990904//ribonucleoprotein complex	GO:0003676//nucleic acid binding;GO:0003723//RNA binding;GO:0003729//mRNA binding	GO:0051252//regulation of RNA metabolic process;GO:1901259//chloroplast rRNA processing
Os04g0295400	244	95	177	58	39	114	1.94	0.75	1.37	0.41	0.31	1	1.35333	0.573333	-1.23907	1.00233e-06	2.42211e-05	-	Hypothetical conserved gene	-	-	-	-	-	GO:0030246//carbohydrate binding	-
Os01g0714600	70	13	22	327	286	292	2.05	0.35	0.62	8.83	8.09	9.98	1.00667	8.96667	3.15499	1.0028e-06	2.42211e-05	-	Similar to cDNA clone:J023088C01, full insert sequence	-	-	-	-	GO:0016020//membrane;GO:0016021//integral component of membrane	-	-
Os09g0123500	72	12	19	277	533	286	1.23	0.19	0.31	4.35	8.76	5.68	0.576667	6.26333	3.44112	1.01519e-06	2.44613e-05	-	Tetratricopeptide-like helical domain containing protein	-	-	-	-	-	GO:0005515//protein binding	-
Os03g0711400	352	135	305	1089	1576	1044	3.66	1.93	2.97	13.55	19.51	16.26	2.85333	16.44	2.52649	1.02129e-06	2.45196e-05	OsWD40-84	Similar to Coatomer alpha subunit	-	-	-	-	GO:0000139//Golgi membrane;GO:0005737//cytoplasm;GO:0005794//Golgi apparatus;GO:0016020//membrane;GO:0030117//membrane coat;GO:0030126//COPI vesicle coat;GO:0030663//COPI-coated vesicle membrane;GO:0031410//cytoplasmic vesicle	GO:0005198//structural molecule activity;GO:0005515//protein binding	GO:0006886//intracellular protein transport;GO:0006888//ER to Golgi vesicle-mediated transport;GO:0006890//retrograde vesicle-mediated transport, Golgi to ER;GO:0006891//intra-Golgi vesicle-mediated transport;GO:0015031//protein transport;GO:0016192//vesicle-mediated transport
Os02g0503400	30	11	34	186	180	193	1.55	0.52	1.7	8.86	9	11.66	1.25667	9.84	2.96906	1.03953e-06	2.49274e-05	OsRPL35	Similar to 60S ribosomal protein L35	Genetic Information Processing	Translation	ko03010//Ribosome	K02918	GO:0005840//ribosome;GO:0022625//cytosolic large ribosomal subunit	GO:0003729//mRNA binding;GO:0003735//structural constituent of ribosome	GO:0000463//maturation of LSU-rRNA from tricistronic rRNA transcript (SSU-rRNA, 5.8S rRNA, LSU-rRNA);GO:0006412//translation
Os01g0342750	3	2	0	150	30	155	0.04	0.02	0	1.78	0.37	2.32	0.02	1.49	6.21917	1.04289e-06	2.4978e-05	-	Hypothetical conserved gene	-	-	-	-	GO:0005886//plasma membrane;GO:0016020//membrane;GO:0016021//integral component of membrane	GO:0000166//nucleotide binding;GO:0005524//ATP binding;GO:0016887//ATPase activity;GO:0042626//ATPase activity, coupled to transmembrane movement of substances	GO:0055085//transmembrane transport
Os03g0141000	16	3	7	104	144	96	0.23	0.03	0.1	1.42	2.06	1.65	0.12	1.71	3.83289	1.04999e-06	2.5118e-05	-	60S ribosomal protein L21	Genetic Information Processing	Translation	ko03010//Ribosome	K02889	GO:0005840//ribosome;GO:0022625//cytosolic large ribosomal subunit	GO:0003735//structural constituent of ribosome	GO:0006412//translation
Os05g0125600	28	10	24	183	183	135	0.49	0.32	0.4	4.03	4.54	3.22	0.403333	3.93	3.28448	1.05398e-06	2.51832e-05	-	Protein of unknown function DUF1677, Oryza sativa family protein	-	-	-	-	-	-	-
Os02g0525900	17	6	28	155	269	143	0.18	0.09	0.3	1.56	2.91	1.8	0.19	2.09	3.45943	1.07207e-06	2.55849e-05	-	Similar to Acetyl-coenzyme A synthetase 2 (EC 6.2.1.1) (Acetate--CoA ligase 2) (Acyl-activating enzyme 2)	Metabolism;Metabolism;Metabolism;Metabolism;Metabolism;Metabolism;Metabolism	Global and overview maps;Global and overview maps;Global and overview maps;Carbohydrate metabolism;Carbohydrate metabolism;Carbohydrate metabolism;Carbohydrate metabolism	ko01100//Metabolic pathways;ko01110//Biosynthesis of secondary metabolites;ko01200//Carbon metabolism;ko00010//Glycolysis / Gluconeogenesis;ko00620//Pyruvate metabolism;ko00630//Glyoxylate and dicarboxylate metabolism;ko00640//Propanoate metabolism	K01895;K01895;K01895;K01895;K01895;K01895;K01895	-	GO:0000166//nucleotide binding;GO:0003824//catalytic activity;GO:0003987//acetate-CoA ligase activity;GO:0005524//ATP binding;GO:0016208//AMP binding;GO:0016874//ligase activity	GO:0019427//acetyl-CoA biosynthetic process from acetate
Os08g0269700	530	227	456	166	72	265	23.74	9.33	19.76	6.85	3.11	13.83	17.61	7.93	-1.151	1.08021e-06	2.57485e-05	-	Conserved hypothetical protein	-	-	-	-	-	-	-
Os05g0550800	0	0	0	28	98	43	0	0	0	0.34	1.25	0.67	0.001	0.753333	9.55714	1.08466e-06	2.58237e-05	-	Serine/threonine protein kinase domain containing protein	-	-	-	-	GO:0005886//plasma membrane;GO:0016020//membrane;GO:0016021//integral component of membrane	GO:0004672//protein kinase activity;GO:0004674//protein serine/threonine kinase activity;GO:0005524//ATP binding	GO:0006468//protein phosphorylation;GO:0007166//cell surface receptor signaling pathway
Os01g0389200	0	0	0	36	48	61	0	0	0	1.02	1.42	2.18	0.001	1.54	10.5887	1.09682e-06	2.60821e-05	-	Protein of unknown function DUF679 family protein	-	-	-	-	GO:0016020//membrane;GO:0016021//integral component of membrane	-	GO:0010256//endomembrane system organization
Os09g0294000	6087	2543	4047	1525	522	2622	57.95	22.22	37.27	13.37	4.8	29.1	39.1467	15.7567	-1.31293	1.10919e-06	2.63136e-05	-	Similar to Bifunctional aspartokinase/homoserine dehydrogenase 2, chloroplast precursor (AK-HD 2) (AK-HSDH 2) [Includes: Aspartokinase (EC 2.7.2.4); Homoserine dehydrogenase (EC 1.1.1.3)]	Metabolism;Metabolism;Metabolism;Metabolism;Metabolism;Metabolism;Metabolism	Global and overview maps;Global and overview maps;Global and overview maps;Amino acid metabolism;Amino acid metabolism;Amino acid metabolism;Biosynthesis of other secondary metabolites	ko01100//Metabolic pathways;ko01110//Biosynthesis of secondary metabolites;ko01230//Biosynthesis of amino acids;ko00270//Cysteine and methionine metabolism;ko00260//Glycine, serine and threonine metabolism;ko00300//Lysine biosynthesis;ko00261//Monobactam biosynthesis	K12524;K12524;K12524;K12524;K12524;K12524;K12524	-	GO:0004072//aspartate kinase activity;GO:0004412//homoserine dehydrogenase activity;GO:0016491//oxidoreductase activity;GO:0050661//NADP binding	GO:0006520//cellular amino acid metabolic process;GO:0008652//cellular amino acid biosynthetic process;GO:0009067//aspartate family amino acid biosynthetic process;GO:0009090//homoserine biosynthetic process;GO:0016310//phosphorylation;GO:0055114//oxidation-reduction process
Os03g0395000	21	0	16	161	173	224	0.68	0	0.52	5.01	5.62	8.81	0.4	6.48	4.01792	1.11123e-06	2.63241e-05	OsHO2	Stroma-localized heme oxygenase 2, Tetrapyrrole biosynthesi	-	-	-	-	GO:0009507//chloroplast;GO:0009536//plastid	GO:0004392//heme oxygenase (decyclizing) activity;GO:0016491//oxidoreductase activity	GO:0006788//heme oxidation;GO:0010024//phytochromobilin biosynthetic process;GO:0015979//photosynthesis;GO:0055114//oxidation-reduction process
Os08g0137800	0	0	0	52	41	48	0	0	0	1.64	1.35	1.91	0.001	1.63333	10.6736	1.12443e-06	2.65775e-05	OsUCL24	Cupredoxin domain containing protein	-	-	-	-	GO:0016020//membrane;GO:0016021//integral component of membrane;GO:0046658//anchored component of plasma membrane	GO:0009055//electron carrier activity	GO:0022900//electron transport chain
Os03g0773300	345	103	420	2015	1867	1271	3.85	1.06	4.52	20.68	20.08	16.51	3.14333	19.09	2.60245	1.1273e-06	2.65775e-05	-	Protein kinase, core domain containing protein	-	-	-	-	GO:0005886//plasma membrane;GO:0016020//membrane;GO:0016021//integral component of membrane	GO:0004672//protein kinase activity;GO:0004675//transmembrane receptor protein serine/threonine kinase activity;GO:0005515//protein binding;GO:0005524//ATP binding;GO:0016301//kinase activity	GO:0006468//protein phosphorylation;GO:0007178//transmembrane receptor protein serine/threonine kinase signaling pathway;GO:0016310//phosphorylation
Os01g0660200	154	21	336	2912	1606	1958	3.7	0.46	7.81	64.43	37.24	54.83	3.99	52.1667	3.70867	1.14471e-06	2.6899e-05	C10728	Acidic class III chitinase OsChib3a precursor (Chitinase) (EC 3.2.1.14)	Metabolism;Metabolism	Global and overview maps;Carbohydrate metabolism	ko01100//Metabolic pathways;ko00520//Amino sugar and nucleotide sugar metabolism	K01183;K01183	GO:0005576//extracellular region	GO:0004553//hydrolase activity, hydrolyzing O-glycosyl compounds;GO:0004568//chitinase activity;GO:0016787//hydrolase activity;GO:0016798//hydrolase activity, acting on glycosyl bonds	GO:0005975//carbohydrate metabolic process;GO:0008152//metabolic process
Os06g0557100	317	64	253	1236	1386	982	2.37	0.44	1.83	8.64	10	8.6	1.54667	9.08	2.55353	1.14598e-06	2.6899e-05	-	Serine/threonine protein kinase domain containing protein	-	-	-	-	GO:0005886//plasma membrane;GO:0016020//membrane;GO:0016021//integral component of membrane	GO:0000166//nucleotide binding;GO:0004672//protein kinase activity;GO:0004674//protein serine/threonine kinase activity;GO:0005515//protein binding;GO:0005524//ATP binding;GO:0016301//kinase activity;GO:0016740//transferase activity	GO:0006468//protein phosphorylation;GO:0016310//phosphorylation
Os10g0498000	40	6	15	0	0	0	1.02	0.14	0.37	0	0	0	0.51	0.001	-8.99435	1.178e-06	2.75532e-05	-	Similar to Epoxide hydrolase	-	-	-	-	-	GO:0003824//catalytic activity;GO:0016787//hydrolase activity	-
Os01g0830700	101	39	83	345	537	371	1.52	0.54	1.2	4.77	7.67	6.48	1.08667	6.30667	2.53697	1.19761e-06	2.79465e-05	OsTBL12	Protein of unknown function DUF231, plant domain containing protein	-	-	-	-	GO:0005794//Golgi apparatus;GO:0016020//membrane;GO:0016021//integral component of membrane	GO:0016413//O-acetyltransferase activity;GO:0016740//transferase activity	-
MSTRG.28752	9	3	15	182	151	79	0.33	0.1	0.53	6.18	5.35	3.39	0.32	4.97333	3.95807	1.20113e-06	2.79961e-05	--	Os12g0432301, partial [Oryza sativa Japonica Group]	-	-	-	-	-	-	-
Os08g0260600	2	1	28	254	594	185	0.05	0.03	0.74	6.37	15.62	5.87	0.273333	9.28667	5.08643	1.20305e-06	2.8008e-05	OsTET11	Tetraspanin domain containing protein	-	-	-	-	GO:0005886//plasma membrane;GO:0009506//plasmodesma;GO:0016020//membrane;GO:0016021//integral component of membrane	-	-
Os01g0951200	6	3	17	140	143	108	0.09	0.04	0.23	1.84	1.97	1.8	0.12	1.87	3.96193	1.23347e-06	2.86162e-05	UMPS1	Similar to Orotidine 5'-phosphate decarboxylase (EC 4.1.1.23	Metabolism;Metabolism	Global and overview maps;Nucleotide metabolism	ko01100//Metabolic pathways;ko00240//Pyrimidine metabolism	K13421;K13421	-	GO:0003824//catalytic activity;GO:0004588//orotate phosphoribosyltransferase activity;GO:0004590//orotidine-5'-phosphate decarboxylase activity;GO:0016740//transferase activity;GO:0016757//transferase activity, transferring glycosyl groups;GO:0016829//lyase activity;GO:0016831//carboxy-lyase activity	GO:0006207//'de novo' pyrimidine nucleobase biosynthetic process;GO:0006221//pyrimidine nucleotide biosynthetic process;GO:0006222//UMP biosynthetic process;GO:0008152//metabolic process;GO:0009116//nucleoside metabolic process;GO:0019856//pyrimidine nucleobase biosynthetic process;GO:0044205//'de novo' UMP biosynthetic process
Os04g0664600	0	0	1	164	73	33	0	0	0.02	3.32	1.55	0.85	0.00666667	1.90667	8.15987	1.24248e-06	2.87593e-05	-	Similar to H1005F08.3 protein	Metabolism;Metabolism;Metabolism;Metabolism;Metabolism	Global and overview maps;Global and overview maps;Biosynthesis of other secondary metabolites;Biosynthesis of other secondary metabolites;Biosynthesis of other secondary metabolites	ko01100//Metabolic pathways;ko01110//Biosynthesis of secondary metabolites;ko00940//Phenylpropanoid biosynthesis;ko00941//Flavonoid biosynthesis;ko00945//Stilbenoid, diarylheptanoid and gingerol biosynthesis	K13065;K13065;K13065;K13065;K13065	-	GO:0016740//transferase activity;GO:0016746//transferase activity, transferring acyl groups;GO:0016747//transferase activity, transferring acyl groups other than amino-acyl groups;GO:0050734//hydroxycinnamoyltransferase activity	-
Os07g0218700	1	2	0	442	52	941	0.02	0.03	0	6.77	0.83	18.22	0.0166667	8.60667	9.01235	1.24264e-06	2.87593e-05	-	Cytochrome P450 family protein	-	-	-	-	GO:0016020//membrane	GO:0004497//monooxygenase activity;GO:0005506//iron ion binding;GO:0016491//oxidoreductase activity;GO:0016705//oxidoreductase activity, acting on paired donors, with incorporation or reduction of molecular oxygen;GO:0016709//oxidoreductase activity, acting on paired donors, with incorporation or reduction of molecular oxygen, NAD(P)H as one donor, and incorporation of one atom of oxygen;GO:00200…	GO:0055114//oxidation-reduction process
Os01g0881300	522	230	336	101	47	224	13.3	5.37	8.15	2.29	1.12	6.56	8.94	3.32333	-1.42764	1.24396e-06	2.87593e-05	OsSWEET1a	Non-protein coding transcript	-	-	-	-	GO:0005886//plasma membrane;GO:0005887//integral component of plasma membrane;GO:0016020//membrane;GO:0016021//integral component of membrane	GO:0051119//sugar transmembrane transporter activity	GO:0008643//carbohydrate transport;GO:0034219//carbohydrate transmembrane transport
Os07g0435400	31	5	50	313	288	262	0.36	0.05	0.55	3.3	3.19	3.5	0.32	3.33	3.37938	1.28145e-06	2.95918e-05	OsWD40-143	Similar to WD40	-	-	-	-	GO:0005634//nucleus;GO:0005654//nucleoplasm;GO:0005730//nucleolus;GO:0030687//preribosome, large subunit precursor;GO:0070545//PeBoW complex	GO:0005515//protein binding;GO:0043021//ribonucleoprotein complex binding	GO:0000463//maturation of LSU-rRNA from tricistronic rRNA transcript (SSU-rRNA, 5.8S rRNA, LSU-rRNA);GO:0000466//maturation of 5.8S rRNA from tricistronic rRNA transcript (SSU-rRNA, 5.8S rRNA, LSU-rRNA);GO:0006364//rRNA processing;GO:0007276//gamete generation;GO:0042254//ribosome biogenesis;GO:0042273//ribosomal large subunit biogenesis;GO:0051302//regulation of cell division
Os11g0666200	0	0	1	93	54	65	0	0	0.02	1.58	0.96	1.39	0.00666667	1.31	7.61839	1.28386e-06	2.96133e-05	OsRLCK345	Similar to Protein kinase domain containing protein	-	-	-	-	-	GO:0004672//protein kinase activity;GO:0005524//ATP binding;GO:0016301//kinase activity	GO:0006468//protein phosphorylation;GO:0007166//cell surface receptor signaling pathway;GO:0016310//phosphorylation
Os01g0805400	3	6	2	75	167	99	0.05	0.1	0.03	1.21	2.82	2.02	0.06	2.01667	5.07087	1.28661e-06	2.96424e-05	OsEnS-18	UDP-glucuronosyl/UDP-glucosyltransferase family protein	-	-	-	-	GO:0043231//intracellular membrane-bounded organelle	GO:0008194//UDP-glycosyltransferase activity;GO:0016740//transferase activity;GO:0016757//transferase activity, transferring glycosyl groups;GO:0016758//transferase activity, transferring hexosyl groups;GO:0080043//quercetin 3-O-glucosyltransferase activity;GO:0080044//quercetin 7-O-glucosyltransferase activity	-
Os12g0561900	29	11	11	0	0	0	0.5	0.17	0.18	0	0	0	0.283333	0.001	-8.14636	1.29174e-06	2.97263e-05	-	Similar to UDP-glucoronosyl and UDP-glucosyl transferase family protein, expressed	-	-	-	-	GO:0043231//intracellular membrane-bounded organelle	GO:0008194//UDP-glycosyltransferase activity;GO:0016740//transferase activity;GO:0016757//transferase activity, transferring glycosyl groups;GO:0016758//transferase activity, transferring hexosyl groups;GO:0080043//quercetin 3-O-glucosyltransferase activity;GO:0080044//quercetin 7-O-glucosyltransferase activity	-
Os01g0873100	723	188	424	141	92	293	35.2	8.38	19.94	6.34	4.32	16.61	21.1733	9.09	-1.2199	1.31572e-06	3.0229e-05	-	Similar to Amidophosphoribosyltransferase, chloroplast precursor (EC 2.4.2.14) (Glutamine phosphoribosylpyrophosphate amidotransferase) (ATASE) (GPAT)	Metabolism;Metabolism;Metabolism;Metabolism	Global and overview maps;Global and overview maps;Nucleotide metabolism;Amino acid metabolism	ko01100//Metabolic pathways;ko01110//Biosynthesis of secondary metabolites;ko00230//Purine metabolism;ko00250//Alanine, aspartate and glutamate metabolism	K00764;K00764;K00764;K00764	-	-	-
Os07g0680000	11	7	40	198	388	227	0.14	0.08	0.47	2.21	4.54	3.21	0.23	3.32	3.85148	1.317e-06	3.0229e-05	VSR3	Similar to Vacuolar sorting receptor 1 precursor (AtVSR1) (Epidermal growth factor receptor-like protein 1) (AtELP1) (AtELP) (BP80-like protein b) (AtBP80b) (Spot 3 protein)	-	-	-	-	GO:0005768//endosome;GO:0005802//trans-Golgi network;GO:0016020//membrane;GO:0016021//integral component of membrane;GO:0017119//Golgi transport complex	GO:0005509//calcium ion binding;GO:0061630//ubiquitin protein ligase activity	GO:0006511//ubiquitin-dependent protein catabolic process;GO:0006623//protein targeting to vacuole;GO:0006896//Golgi to vacuole transport;GO:0016567//protein ubiquitination
Os02g0722300	125	56	142	638	560	491	1.59	0.65	1.74	7.46	6.86	7.26	1.32667	7.19333	2.43885	1.31812e-06	3.0229e-05	-	Nonaspanin (TM9SF) family protein	-	-	-	-	GO:0005768//endosome;GO:0005794//Golgi apparatus;GO:0005802//trans-Golgi network;GO:0016020//membrane;GO:0016021//integral component of membrane	-	GO:0072657//protein localization to membrane
Os02g0173200	35	10	48	223	260	231	0.91	0.24	1.2	5.32	6.5	6.98	0.783333	6.26667	3	1.36679e-06	3.12019e-05	OsVQ5	VQ domain containing protein	-	-	-	-	-	-	-
Os05g0158500	7	7	26	199	187	159	0.12	0.1	0.41	2.98	2.94	3.01	0.21	2.97667	3.82524	1.38782e-06	3.16458e-05	GS5	Serine carboxypeptidase, Positive regulator of grain siz	-	-	-	-	GO:0005576//extracellular region;GO:0005773//vacuole	GO:0004180//carboxypeptidase activity;GO:0004185//serine-type carboxypeptidase activity;GO:0008233//peptidase activity;GO:0016787//hydrolase activity	GO:0006508//proteolysis;GO:0051603//proteolysis involved in cellular protein catabolic process
Os12g0577600	84	50	73	21	38	34	0.91	0.5	0.76	0.21	0.4	0.43	0.723333	0.346667	-1.06111	1.39474e-06	3.17673e-05	-	Protein of unknown function DUF1336 domain containing protein	-	-	-	-	-	-	-
Os02g0821800	6	4	15	125	230	84	0.15	0.06	0.31	2.64	5.35	2.49	0.173333	3.49333	4.33298	1.40795e-06	3.20316e-05	OsMed18_1	Similar to Fibrillarin-2	Genetic Information Processing	Translation	ko03008//Ribosome biogenesis in eukaryotes	K14563	GO:0015030//Cajal body;GO:0031428//box C/D snoRNP complex;GO:0032040//small-subunit processome	GO:0003723//RNA binding;GO:0008168//methyltransferase activity;GO:0008649//rRNA methyltransferase activity;GO:1990259//histone-glutamine methyltransferase activity	GO:0000494//box C/D snoRNA 3'-end processing;GO:0006364//rRNA processing;GO:0031167//rRNA methylation;GO:1990258//histone glutamine methylation
Os01g0227800	279	125	139	44	15	89	4.48	1.84	2.16	0.65	0.23	1.67	2.82667	0.85	-1.73357	1.44429e-06	3.27837e-05	-	Similar to cDNA, clone: J075083L18, full insert sequence	-	-	-	-	GO:0016020//membrane;GO:0016021//integral component of membrane	GO:0004497//monooxygenase activity;GO:0005506//iron ion binding;GO:0016491//oxidoreductase activity;GO:0016705//oxidoreductase activity, acting on paired donors, with incorporation or reduction of molecular oxygen;GO:0016709//oxidoreductase activity, acting on paired donors, with incorporation or reduction of molecular oxygen, NAD(P)H as one donor, and incorporation of one atom of oxygen;GO:00200…	GO:0055114//oxidation-reduction process
Os01g0649000	50	12	36	239	266	185	0.66	0.15	0.46	2.93	3.41	2.87	0.423333	3.07	2.85837	1.46077e-06	3.31202e-05	-	WD40 repeat-like domain containing protein	Genetic Information Processing	Translation	ko03008//Ribosome biogenesis in eukaryotes	K14546	-	GO:0005515//protein binding	-
Os05g0350500	19	16	18	151	239	155	0.4	0.31	0.36	2.89	4.8	3.76	0.356667	3.81667	3.41966	1.46451e-06	3.31673e-05	-	Peptidase M24, structural domain domain containing protein	-	-	-	-	GO:0005730//nucleolus;GO:0005737//cytoplasm	GO:0003676//nucleic acid binding;GO:0003677//DNA binding	GO:0000055//ribosomal large subunit export from nucleus
Os09g0482100	756	291	665	2609	3354	1990	9.32	3.29	7.93	29.62	39.9	28.59	6.84667	32.7033	2.25596	1.52371e-06	3.4469e-05	OsHSP82	Similar to Heat shock protein 82	Organismal Systems;Genetic Information Processing	Environmental adaptation;Folding, sorting and degradation	ko04626//Plant-pathogen interaction;ko04141//Protein processing in endoplasmic reticulum	K04079;K04079	GO:0005737//cytoplasm;GO:0005829//cytosol;GO:0005886//plasma membrane;GO:0009986//cell surface;GO:0032991//macromolecular complex;GO:0048471//perinuclear region of cytoplasm	GO:0000166//nucleotide binding;GO:0005524//ATP binding;GO:0051082//unfolded protein binding	GO:0006457//protein folding;GO:0009408//response to heat;GO:0034605//cellular response to heat;GO:0050821//protein stabilization
Os04g0587500	23	5	15	135	179	111	0.43	0.09	0.27	2.31	3.21	2.41	0.263333	2.64333	3.3274	1.54963e-06	3.49762e-05	OsPUP13	Domain of unknown function DUF250 domain containing protein	-	-	-	-	GO:0016020//membrane;GO:0016021//integral component of membrane	GO:0005215//transporter activity;GO:0015211//purine nucleoside transmembrane transporter activity	GO:0015860//purine nucleoside transmembrane transport
Os07g0558300	1136	834	641	199	105	539	22.15	14.92	12.09	3.57	1.98	12.25	16.3867	5.93333	-1.46561	1.57117e-06	3.54222e-05	-	Inositol monophosphatase family protein	Metabolism;Metabolism	Global and overview maps;Energy metabolism	ko01100//Metabolic pathways;ko00920//Sulfur metabolism	K01082;K01082	GO:0005737//cytoplasm	GO:0008441//3'(2'),5'-bisphosphate nucleotidase activity;GO:0042578//phosphoric ester hydrolase activity	GO:0000103//sulfate assimilation;GO:0016311//dephosphorylation;GO:0046854//phosphatidylinositol phosphorylation
Os01g0148700	94	37	92	328	508	398	2	0.72	1.89	6.41	10.41	9.83	1.53667	8.88333	2.5313	1.59434e-06	3.58638e-05	-	Protein of unknown function DUF1677, Oryza sativa family protein	-	-	-	-	-	-	-
Os07g0410700	0	2	1	68	130	49	0	0.04	0.02	1.25	2.5	1.14	0.02	1.63	6.34873	1.59861e-06	3.59192e-05	DERF2	Similar to Ethylene-responsive element binding protein 1	Environmental Information Processing;Environmental Information Processing	Signal transduction;Signal transduction	ko04075//Plant hormone signal transduction;ko04016//MAPK signaling pathway - plant	K14516;K14516	GO:0005634//nucleus	GO:0003677//DNA binding;GO:0003700//transcription factor activity, sequence-specific DNA binding	GO:0006355//regulation of transcription, DNA-templated
Os04g0394766	195	107	180	53	6	52	5.32	2.68	4.76	1.35	0.17	1.67	4.25333	1.06333	-2	1.60281e-06	3.59732e-05	-	Non-protein coding transcript	-	-	-	-	-	-	-
Os04g0174100	63	8	29	0	3	0	2.74	0.33	1.23	0	0.11	0	1.43333	0.0366667	-5.28876	1.61357e-06	3.61569e-05	-	Similar to OSIGBa0114I04.1 protein	Metabolism;Metabolism;Metabolism;Metabolism;Metabolism	Global and overview maps;Global and overview maps;Metabolism of other amino acids;Global and overview maps;Biosynthesis of other secondary metabolites	ko01100//Metabolic pathways;ko01110//Biosynthesis of secondary metabolites;ko00460//Cyanoamino acid metabolism;ko01210//2-Oxocarboxylic acid metabolism;ko00966//Glucosinolate biosynthesis	K12153;K12153;K12153;K12153;K12153	GO:0016020//membrane	GO:0004497//monooxygenase activity;GO:0005506//iron ion binding;GO:0016491//oxidoreductase activity;GO:0016705//oxidoreductase activity, acting on paired donors, with incorporation or reduction of molecular oxygen;GO:0016709//oxidoreductase activity, acting on paired donors, with incorporation or reduction of molecular oxygen, NAD(P)H as one donor, and incorporation of one atom of oxygen;GO:00200…	GO:0055114//oxidation-reduction process
Os09g0460500	691	280	326	87	102	294	16.98	6.32	7.75	1.97	2.42	8.42	10.35	4.27	-1.27732	1.61462e-06	3.61569e-05	-	Lipase, GDXG, active site domain containing protein	-	-	-	-	-	GO:0016787//hydrolase activity	GO:0009056//catabolic process
Os01g0884400	38	11	42	299	172	283	0.41	0.11	0.44	3	1.81	3.59	0.32	2.8	3.12928	1.62029e-06	3.62433e-05	OsPUB16	Armadillo domain containing protein	-	-	-	-	GO:0005634//nucleus;GO:0005737//cytoplasm	GO:0004842//ubiquitin-protein transferase activity;GO:0005515//protein binding	GO:0016567//protein ubiquitination
Os02g0699600	21	16	14	156	254	149	0.75	0.53	0.48	5.14	8.77	6.21	0.586667	6.70667	3.51498	1.65065e-06	3.67169e-05	-	Similar to 60S ribosomal protein L12	Genetic Information Processing	Translation	ko03010//Ribosome	K02870	GO:0005840//ribosome;GO:0015934//large ribosomal subunit;GO:0022625//cytosolic large ribosomal subunit	GO:0003735//structural constituent of ribosome;GO:0019843//rRNA binding;GO:0070180//large ribosomal subunit rRNA binding	GO:0000027//ribosomal large subunit assembly;GO:0006412//translation
Os03g0190300	10	3	15	166	103	103	0.16	0.05	0.23	2.39	1.55	1.87	0.146667	1.93667	3.72296	1.74238e-06	3.87143e-05	-	Similar to protein binding protein	-	-	-	-	GO:0005737//cytoplasm	GO:0005200//structural constituent of cytoskeleton;GO:0005515//protein binding;GO:0019901//protein kinase binding	-
Os03g0168200	21	8	16	148	112	154	0.55	0.19	0.4	3.54	2.81	4.67	0.38	3.67333	3.27302	1.75003e-06	3.88157e-05	-	Similar to F16A14.21	-	-	-	-	-	-	-
Os03g0297400	19	12	24	183	395	121	0.38	0.22	0.46	3.37	7.61	2.82	0.353333	4.6	3.70253	1.75084e-06	3.88157e-05	-	Acyl transferase domain containing protein	Metabolism;Metabolism;Metabolism;Metabolism	Global and overview maps;Global and overview maps;Global and overview maps;Lipid metabolism	ko01100//Metabolic pathways;ko01110//Biosynthesis of secondary metabolites;ko01212//Fatty acid metabolism;ko00061//Fatty acid biosynthesis	K00645;K00645;K00645;K00645	-	GO:0004314//[acyl-carrier-protein] S-malonyltransferase activity;GO:0016740//transferase activity	GO:0006633//fatty acid biosynthetic process
Os03g0225500	17	0	25	217	268	178	0.12	0	0.17	1.42	1.84	1.47	0.0966667	1.57667	4.02772	1.78113e-06	3.93562e-05	NUP133	Nucleoporin, Common symbiosis signaling (SYM) pathwa	Genetic Information Processing	Translation	ko03013//RNA transport	K14300	GO:0000777//condensed chromosome kinetochore;GO:0005623//cell;GO:0016020//membrane;GO:0031080//nuclear pore outer ring	GO:0017056//structural constituent of nuclear pore	GO:0000972//transcription-dependent tethering of RNA polymerase II gene DNA at nuclear periphery;GO:0006355//regulation of transcription, DNA-templated;GO:0006405//RNA export from nucleus;GO:0006606//protein import into nucleus;GO:0006913//nucleocytoplasmic transport;GO:0031081//nuclear pore distribution
Os12g0127200	5	4	8	84	90	91	0.13	0.09	0.2	1.99	2.23	2.73	0.14	2.31667	4.04855	1.78651e-06	3.94314e-05	-	Harpin-induced 1 domain containing protein	-	-	-	-	GO:0016020//membrane;GO:0016021//integral component of membrane	-	-
Os05g0594100	495	189	376	1261	1515	1388	12.31	4.29	8.74	28.79	35.97	39.68	8.44667	34.8133	2.04319	1.81315e-06	3.99755e-05	-	Similar to GDA2 protein	-	-	-	-	-	-	-
Os12g0458100	1603	533	1270	317	165	761	26.08	7.96	19.99	4.75	2.59	14.43	18.01	7.25667	-1.31142	1.84078e-06	4.05398e-05	HSR201	Transferase family protein	-	-	-	-	-	GO:0016740//transferase activity;GO:0016746//transferase activity, transferring acyl groups;GO:0016747//transferase activity, transferring acyl groups other than amino-acyl groups;GO:0050734//hydroxycinnamoyltransferase activity	-
Os10g0400800	53	19	53	258	319	215	1.02	0.35	1.12	4.25	5.68	4.36	0.83	4.76333	2.52079	1.84424e-06	4.05713e-05	-	Similar to Phenylalanyl-tRNA synthetase alpha chain (EC 6.1.1.20) (Phenylalanine--tRNA ligase alpha chain) (PheRS) (CML33)	Genetic Information Processing	Translation	ko00970//Aminoacyl-tRNA biosynthesis	K01889	GO:0005737//cytoplasm;GO:0005829//cytosol;GO:0009328//phenylalanine-tRNA ligase complex	GO:0000049//tRNA binding;GO:0000166//nucleotide binding;GO:0004812//aminoacyl-tRNA ligase activity;GO:0004826//phenylalanine-tRNA ligase activity;GO:0005524//ATP binding	GO:0006432//phenylalanyl-tRNA aminoacylation;GO:0043039//tRNA aminoacylation
Os11g0550500	35	12	67	266	360	343	0.31	0.1	0.58	2.22	3.15	3.63	0.33	3	3.18442	1.85483e-06	4.07594e-05	-	Similar to LZ-NBS-LRR class RGA	-	-	-	-	-	GO:0000166//nucleotide binding;GO:0005524//ATP binding;GO:0043531//ADP binding	GO:0006952//defense response
Os09g0460300	661	391	298	109	42	248	12.93	7.02	5.64	1.96	0.79	5.65	8.53	2.8	-1.60712	1.92374e-06	4.22271e-05	-	Alpha/beta hydrolase fold-3 domain containing protein	-	-	-	-	-	GO:0016787//hydrolase activity	GO:0009056//catabolic process
MSTRG.30736	3	1	15	592	54	144	0.06	0.01	0.3	10.11	0.98	3.15	0.123333	4.74667	5.26628	1.92898e-06	4.22958e-05	--	Os09g0304800 [Oryza sativa Japonica Group]	-	-	-	-	-	-	-
Os01g0251100	10	4	5	90	102	79	0.23	0.09	0.11	1.93	2.23	2.09	0.143333	2.08333	3.86145	1.93595e-06	4.2402e-05	-	Similar to 50S ribosomal protein L3-2, chloroplast precursor	Genetic Information Processing	Translation	ko03010//Ribosome	K02906	GO:0005739//mitochondrion;GO:0005762//mitochondrial large ribosomal subunit;GO:0005840//ribosome	GO:0003735//structural constituent of ribosome	GO:0006412//translation
Os06g0547400	39	4	18	166	428	175	0.86	0.08	0.38	3.38	9.13	4.51	0.44	5.67333	3.68862	1.93867e-06	4.24151e-05	prx86	Similar to Peroxidase P7 (EC 1.11.1.7) (TP7)	Metabolism;Metabolism;Metabolism	Global and overview maps;Global and overview maps;Biosynthesis of other secondary metabolites	ko01100//Metabolic pathways;ko01110//Biosynthesis of secondary metabolites;ko00940//Phenylpropanoid biosynthesis	K00430;K00430;K00430	GO:0005576//extracellular region	GO:0004601//peroxidase activity;GO:0016491//oxidoreductase activity;GO:0020037//heme binding;GO:0046872//metal ion binding	GO:0006979//response to oxidative stress;GO:0042744//hydrogen peroxide catabolic process;GO:0055114//oxidation-reduction process;GO:0098869//cellular oxidant detoxification
MSTRG.7689	19	7	62	539	262	372	0.05	0.02	0.12	1.34	0.76	1.3	0.0633333	1.13333	4.16146	1.97494e-06	4.31141e-05	TY3B-G	H0502B11.3 [Oryza sativa]	-	-	-	-	GO:0043231//intracellular membrane-bounded organelle	-	GO:0010466//negative regulation of peptidase activity
Os07g0475700	75	49	46	12	9	26	2.3	1.38	1.37	0.34	0.27	0.93	1.68333	0.513333	-1.71335	1.99389e-06	4.34804e-05	OsSAUR30	Auxin responsive SAUR protein family protein	-	-	-	-	-	-	GO:0009733//response to auxin
Os08g0540100	48	16	33	206	330	183	0.99	0.3	0.66	3.9	6.57	4.4	0.65	4.95667	2.93086	1.99631e-06	4.34856e-05	-	Similar to Biotin synthase (EC 2.8.1.6) (Biotin synthetase)	Metabolism;Metabolism	Global and overview maps;Metabolism of cofactors and vitamins	ko01100//Metabolic pathways;ko00780//Biotin metabolism	K01012;K01012	-	GO:0003824//catalytic activity;GO:0004076//biotin synthase activity;GO:0008270//zinc ion binding;GO:0046872//metal ion binding;GO:0051536//iron-sulfur cluster binding;GO:0051537//2 iron, 2 sulfur cluster binding;GO:0051539//4 iron, 4 sulfur cluster binding	GO:0009102//biotin biosynthetic process
Os02g0569000	12	2	4	153	43	274	0.21	0.03	0.07	2.51	0.74	5.68	0.103333	2.97667	4.84832	2.00752e-06	4.35871e-05	CYP76M5	Cytochrome P450 family protein	-	-	-	-	GO:0016020//membrane;GO:0016021//integral component of membrane	GO:0004497//monooxygenase activity;GO:0005506//iron ion binding;GO:0016491//oxidoreductase activity;GO:0016705//oxidoreductase activity, acting on paired donors, with incorporation or reduction of molecular oxygen;GO:0016709//oxidoreductase activity, acting on paired donors, with incorporation or reduction of molecular oxygen, NAD(P)H as one donor, and incorporation of one atom of oxygen;GO:00200…	GO:0006952//defense response;GO:0016102//diterpenoid biosynthetic process;GO:0051502//diterpene phytoalexin biosynthetic process;GO:0055114//oxidation-reduction process
Os03g0178000	1136	257	1146	4184	5627	4039	19.99	4.08	19.43	68.2	96.74	83.74	14.5	82.8933	2.5152	2.03035e-06	4.39873e-05	rfa2*	EF-1 alpha	Genetic Information Processing	Translation	ko03013//RNA transport	K03231	GO:0005737//cytoplasm	GO:0000166//nucleotide binding;GO:0003746//translation elongation factor activity;GO:0003924//GTPase activity;GO:0005525//GTP binding	GO:0006412//translation;GO:0006414//translational elongation
Os03g0161200	9485	2483	4663	2360	1048	3613	121.13	29.1	57.62	27.75	12.92	53.78	69.2833	31.4833	-1.13792	2.04678e-06	4.42952e-05	OsSultr3	Similar to Sulphate transporter	-	-	-	-	GO:0005887//integral component of plasma membrane;GO:0009507//chloroplast;GO:0016020//membrane;GO:0016021//integral component of membrane	GO:0008271//secondary active sulfate transmembrane transporter activity;GO:0015116//sulfate transmembrane transporter activity;GO:0015301//anion:anion antiporter activity	GO:0008272//sulfate transport;GO:0055085//transmembrane transport;GO:0098656//anion transmembrane transport;GO:1902358//sulfate transmembrane transport
Os05g0156300	119	45	108	388	502	430	2.35	0.84	2.01	6.88	9.34	9.63	1.73333	8.61667	2.31358	2.06544e-06	4.46507e-05	PDIL2	Similar to protein disulfide isomerase	Genetic Information Processing	Folding, sorting and degradation	ko04141//Protein processing in endoplasmic reticulum	K09584	GO:0005576//extracellular region;GO:0005623//cell;GO:0005783//endoplasmic reticulum	GO:0003756//protein disulfide isomerase activity;GO:0016853//isomerase activity	GO:0045454//cell redox homeostasis
Os04g0592700	20	4	11	131	114	117	0.19	0.03	0.1	1.13	1.03	1.28	0.106667	1.14667	3.42626	2.11006e-06	4.55659e-05	OsWD40-108	WD40 repeat-like domain containing protein	Genetic Information Processing	Translation	ko03008//Ribosome biogenesis in eukaryotes	K14555	GO:0005730//nucleolus;GO:0032040//small-subunit processome;GO:0034388//Pwp2p-containing subcomplex of 90S preribosome	GO:0005515//protein binding;GO:0030515//snoRNA binding	GO:0000462//maturation of SSU-rRNA from tricistronic rRNA transcript (SSU-rRNA, 5.8S rRNA, LSU-rRNA);GO:0006364//rRNA processing;GO:0009793//embryo development ending in seed dormancy;GO:0009880//embryonic pattern specification;GO:0051301//cell division
Os02g0306401	88	24	167	1359	574	796	1.76	0.44	3.23	25.03	11.09	18.56	1.81	18.2267	3.33199	2.12513e-06	4.57923e-05	OsNAAT1	Similar to Nicotianamine aminotransferase A	-	-	-	-	-	GO:0003824//catalytic activity;GO:0008483//transaminase activity;GO:0016740//transferase activity;GO:0030170//pyridoxal phosphate binding;GO:0033855//nicotianamine aminotransferase activity	GO:0006520//cellular amino acid metabolic process;GO:0009058//biosynthetic process
Os08g0105100	26	10	13	123	159	157	0.36	0.13	0.17	1.56	2.12	2.53	0.22	2.07	3.23406	2.12899e-06	4.5826e-05	OsFbox403	Cyclin-like F-box domain containing protein	-	-	-	-	-	GO:0005515//protein binding	-
Os01g0825800	35	5	38	159	397	273	0.66	0.08	0.7	2.8	7.29	5.98	0.48	5.35667	3.48023	2.14638e-06	4.61507e-05	OsATL7	Amino acid transporter, transmembrane domain containing protein	-	-	-	-	GO:0016020//membrane;GO:0016021//integral component of membrane	GO:0015171//amino acid transmembrane transporter activity	GO:0003333//amino acid transmembrane transport
Os09g0370500	35	20	47	232	290	201	0.58	0.3	0.76	3.55	4.65	3.89	0.546667	4.03	2.88205	2.20387e-06	4.73359e-05	OsVQ35	VQ domain containing protein	-	-	-	-	-	-	-
Os01g0175700	2924	1459	2412	1101	183	986	43	19.69	34.31	14.92	2.6	16.9	32.3333	11.4733	-1.49474	2.20927e-06	4.74007e-05	BOR2	Boron (B) transporte	-	-	-	-	GO:0016020//membrane;GO:0016021//integral component of membrane;GO:0043231//intracellular membrane-bounded organelle	GO:0005452//inorganic anion exchanger activity;GO:0008194//UDP-glycosyltransferase activity	GO:0006820//anion transport;GO:0015698//inorganic anion transport
Os09g0438100	90	92	127	40	32	61	2.79	2.62	3.81	1.14	0.96	2.21	3.07333	1.43667	-1.09708	2.21947e-06	4.75176e-05	-	Conserved hypothetical protein	-	-	-	-	GO:0016020//membrane;GO:0016021//integral component of membrane	-	-
Os04g0573900	16	2	23	116	220	174	0.26	0.03	0.37	1.79	3.31	3.26	0.22	2.78667	3.66297	2.28389e-06	4.87401e-05	OsCYP704A3	Similar to cDNA clone:001-036-C03, full insert sequence	-	-	-	-	-	GO:0005506//iron ion binding;GO:0016705//oxidoreductase activity, acting on paired donors, with incorporation or reduction of molecular oxygen;GO:0020037//heme binding	GO:0055114//oxidation-reduction process
Os07g0198300	134	46	174	914	570	713	4.63	1.46	5.81	29.06	19	28.69	3.96667	25.5833	2.68921	2.30157e-06	4.90126e-05	OsLTPG19	Bifunctional inhibitor/plant lipid transfer protein/seed storage domain containing protein	-	-	-	-	GO:0016020//membrane;GO:0016021//integral component of membrane	-	-
Os06g0293500	1	0	12	168	89	186	0.01	0	0.12	1.62	0.9	2.27	0.0433333	1.59667	5.20344	2.35887e-06	5.01794e-05	-	Conserved hypothetical protein	-	-	-	-	GO:0016020//membrane;GO:0016021//integral component of membrane	-	-
Os03g0619400	42	13	51	236	321	207	0.63	0.18	0.74	3.24	4.62	3.6	0.516667	3.82	2.88627	2.36783e-06	5.03164e-05	-	Chaperone, tailless complex polypeptide 1 domain containing protein	-	-	-	-	GO:0005737//cytoplasm;GO:0005829//cytosol;GO:0005832//chaperonin-containing T-complex	GO:0000166//nucleotide binding;GO:0005524//ATP binding;GO:0051082//unfolded protein binding	GO:0006457//protein folding
Os01g0752700	50	2	44	313	519	322	0.58	0.02	0.5	3.37	5.85	4.38	0.366667	4.53333	3.62803	2.39434e-06	5.08257e-05	-	Similar to GTP-binding protein	-	-	-	-	GO:0005739//mitochondrion;GO:0005829//cytosol;GO:1990904//ribonucleoprotein complex	GO:0003924//GTPase activity;GO:0005525//GTP binding	-
Os12g0115300	1349	694	831	297	149	673	46.94	22.17	27.98	9.51	5	27.29	32.3633	13.9333	-1.21582	2.40609e-06	5.10208e-05	OsLTP1.19	Plant lipid transfer protein and hydrophobic protein, helical domain containing protein	-	-	-	-	GO:0016020//membrane	GO:0008289//lipid binding	GO:0006869//lipid transport
Os05g0576500	16	0	31	203	332	263	0.25	0	0.35	2.54	4.16	4.29	0.2	3.66333	4.19509	2.44475e-06	5.17809e-05	-	Hypothetical conserved gene	-	-	-	-	-	-	-
Os02g0714600	62	15	55	241	379	260	1.49	0.33	1.14	5.31	8.56	7.1	0.986667	6.99	2.82466	2.44798e-06	5.17809e-05	-	Ribose-phosphate pyrophosphokinase 4 (EC 2.7.6.1) (Phosphoribosyl pyrophosphate synthetase 4)	-	-	-	-	GO:0002189//ribose phosphate diphosphokinase complex;GO:0005737//cytoplasm;GO:0005829//cytosol;GO:0005886//plasma membrane;GO:0009506//plasmodesma	GO:0000166//nucleotide binding;GO:0000287//magnesium ion binding;GO:0004749//ribose phosphate diphosphokinase activity;GO:0005524//ATP binding;GO:0016301//kinase activity;GO:0016740//transferase activity;GO:0046872//metal ion binding	GO:0006015//5-phosphoribose 1-diphosphate biosynthetic process;GO:0006164//purine nucleotide biosynthetic process;GO:0009116//nucleoside metabolic process;GO:0009165//nucleotide biosynthetic process;GO:0016310//phosphorylation
Os07g0549200	12	4	15	105	127	102	0.31	0.09	0.37	2.38	3.02	3.06	0.256667	2.82	3.45773	2.45337e-06	5.18035e-05	-	Pentatricopeptide repeat domain containing protein	-	-	-	-	-	GO:0005515//protein binding	-
Os05g0384300	4	6	66	449	1032	421	0.07	0.1	1.19	7.69	18.53	9.13	0.453333	11.7833	4.70003	2.46373e-06	5.19672e-05	-	Peptidase aspartic, catalytic domain containing protein	-	-	-	-	GO:0005576//extracellular region	GO:0004190//aspartic-type endopeptidase activity	GO:0006508//proteolysis;GO:0030163//protein catabolic process
Os03g0292700	112	83	57	24	31	42	2.23	1.51	1.1	0.44	0.59	0.97	1.61333	0.666667	-1.27501	2.48124e-06	5.22262e-05	-	Similar to Protein kinase domain containing protein, expressed	-	-	-	-	GO:0005737//cytoplasm;GO:0016020//membrane;GO:0016021//integral component of membrane	GO:0000166//nucleotide binding;GO:0004672//protein kinase activity;GO:0004674//protein serine/threonine kinase activity;GO:0005524//ATP binding	GO:0006468//protein phosphorylation;GO:0007346//regulation of mitotic cell cycle;GO:0023014//signal transduction by protein phosphorylation;GO:0031098//stress-activated protein kinase signaling cascade;GO:0032147//activation of protein kinase activity
Os09g0458800	34	16	24	4	1	4	3.17	1.37	2.17	0.34	0.09	0.44	2.23667	0.29	-2.94723	2.49581e-06	5.24776e-05	-	EF hand domain containing protein	-	-	-	-	-	GO:0005509//calcium ion binding	-
Os02g0110200	3155	869	1413	377	150	1009	56.64	14.34	24.49	6.24	2.51	20.98	31.8233	9.91	-1.68313	2.5105e-06	5.2731e-05	HPL3	Fatty acid 13-hydroperoxide lyase (CYP74B), Plant defens	Metabolism;Metabolism	Global and overview maps;Lipid metabolism	ko01110//Biosynthesis of secondary metabolites;ko00592//alpha-Linolenic acid metabolism	K10528;K10528	GO:0009941//chloroplast envelope	GO:0004497//monooxygenase activity;GO:0005506//iron ion binding;GO:0016491//oxidoreductase activity;GO:0016705//oxidoreductase activity, acting on paired donors, with incorporation or reduction of molecular oxygen;GO:0016829//lyase activity;GO:0020037//heme binding;GO:0046872//metal ion binding	GO:0009611//response to wounding;GO:0010597//green leaf volatile biosynthetic process;GO:0016125//sterol metabolic process;GO:0055114//oxidation-reduction process
Os06g0707800	43	4	77	440	821	370	0.56	0.03	0.98	4.94	9.87	5.04	0.523333	6.61667	3.6603	2.52628e-06	5.30068e-05	-	Non-protein coding transcript	-	-	-	-	-	GO:0043531//ADP binding	-
Os05g0451100	51	12	30	274	178	244	0.73	0.16	0.42	3.62	2.46	4.08	0.436667	3.38667	2.95526	2.53345e-06	5.31015e-05	OsPT23	Major facilitator superfamily protein	-	-	-	-	GO:0009507//chloroplast;GO:0009536//plastid;GO:0016020//membrane;GO:0016021//integral component of membrane;GO:0031969//chloroplast membrane	GO:0005315//inorganic phosphate transmembrane transporter activity	GO:0006811//ion transport;GO:0055085//transmembrane transport
Os07g0550600	2	0	3	90	69	46	0.04	0	0.05	1.52	1.22	0.98	0.03	1.24	5.36923	2.54958e-06	5.32718e-05	-	Transferase family protein	-	-	-	-	-	GO:0016747//transferase activity, transferring acyl groups other than amino-acyl groups	-
Os11g0621300	90	19	99	510	371	574	0.95	0.18	1.01	4.97	3.79	7.08	0.713333	5.28	2.88789	2.55683e-06	5.33675e-05	-	Protein of unknown function DUF1399 family protein	-	-	-	-	-	-	-
Os05g0120700	479	117	439	1939	2561	1360	12.22	2.75	10.85	45.58	63.12	40.47	8.60667	49.7233	2.5304	2.7126e-06	5.6442e-05	-	ATPase, P-type, K/Mg/Cd/Cu/Zn/Na/Ca/Na/H-transporter family protein	-	-	-	-	GO:0005623//cell;GO:0005783//endoplasmic reticulum;GO:0016021//integral component of membrane	GO:0005388//calcium-transporting ATPase activity;GO:0008553//hydrogen-exporting ATPase activity, phosphorylative mechanism	GO:0006874//cellular calcium ion homeostasis;GO:0070588//calcium ion transmembrane transport;GO:1902600//hydrogen ion transmembrane transport
Os01g0949300	524	146	314	1706	1889	1216	17.27	4.42	10.01	51.78	60.09	46.71	10.5667	52.86	2.32266	2.71859e-06	5.65076e-05	-	EF-Hand type domain containing protein	Organismal Systems	Environmental adaptation	ko04626//Plant-pathogen interaction	K13448	-	GO:0005509//calcium ion binding	-
MSTRG.18002	81	11	21	0	5	2	1.22	0.15	0.31	0	0.07	0.04	0.56	0.0366667	-3.93289	2.7495e-06	5.70908e-05	--	P0560B06.12 [Oryza sativa Japonica Group]	-	-	-	-	-	-	-
MSTRG.26594	503	146	315	208	101	203	4.08	1.15	2.66	1.44	0.62	1.69	2.63	1.25	-1.07313	2.80582e-06	5.81995e-05	pol	OSJNBa0019J05.12 [Oryza sativa Japonica Group]	-	-	-	-	-	-	-
Os12g0218100	0	4	1	72	88	125	0	0.18	0.05	3.28	4.2	7.21	0.0766667	4.89667	5.99706	2.85266e-06	5.89875e-05	-	Similar to cDNA, clone: J065028F04, full insert sequence	-	-	-	-	-	-	-
Os05g0571200	3	0	0	74	48	93	0.09	0	0	1.95	1.33	3.11	0.03	2.13	6.14975	2.88085e-06	5.95089e-05	OsWRKY19	Similar to WRKY transcription factor 19	-	-	-	-	GO:0005634//nucleus	GO:0003677//DNA binding;GO:0003700//transcription factor activity, sequence-specific DNA binding;GO:0043565//sequence-specific DNA binding;GO:0044212//transcription regulatory region DNA binding	GO:0006355//regulation of transcription, DNA-templated
Os03g0108600	35	9	46	245	301	183	0.49	0.12	0.63	3.18	4.09	3.01	0.413333	3.42667	3.05143	2.90303e-06	5.98315e-05	OsRH50	Similar to DEAD-box ATP-dependent RNA helicase 50	-	-	-	-	GO:0009507//chloroplast	GO:0000166//nucleotide binding;GO:0003676//nucleic acid binding;GO:0003723//RNA binding;GO:0003724//RNA helicase activity;GO:0004004//ATP-dependent RNA helicase activity;GO:0004386//helicase activity;GO:0005524//ATP binding;GO:0016787//hydrolase activity	GO:0006952//defense response;GO:0006968//cellular defense response;GO:0009817//defense response to fungus, incompatible interaction;GO:0071369//cellular response to ethylene stimulus;GO:0071395//cellular response to jasmonic acid stimulus;GO:0071446//cellular response to salicylic acid stimulus
Os01g0798100	20	6	28	184	158	142	0.3	0.05	0.25	1.81	1.51	1.71	0.2	1.67667	3.06752	2.90546e-06	5.98315e-05	-	Similar to cDNA clone:J023120H23, full insert sequence	-	-	-	-	-	-	-
Os12g0576700	67	14	94	402	649	370	0.99	0.19	1.33	5.44	9.21	6.34	0.836667	6.99667	3.06394	3.03615e-06	6.24585e-05	OsPAP1c	Similar to Diphosphonucleotide phosphatase 1 precursor	-	-	-	-	-	GO:0003993//acid phosphatase activity;GO:0016787//hydrolase activity;GO:0046872//metal ion binding	GO:0016311//dephosphorylation
Os05g0274900	29	0	27	288	227	287	1.38	0	1.28	12.82	10.58	16.18	0.886667	13.1933	3.89527	3.04014e-06	6.24761e-05	-	Similar to 60S ribosomal protein L15-1	Genetic Information Processing	Translation	ko03010//Ribosome	K02877	GO:0005840//ribosome;GO:0022625//cytosolic large ribosomal subunit	GO:0003723//RNA binding;GO:0003735//structural constituent of ribosome	GO:0002181//cytoplasmic translation;GO:0006412//translation
Os07g0207400	8	0	7	72	87	131	0.27	0	0.23	2.27	2.87	5.22	0.166667	3.45333	4.37295	3.07111e-06	6.29569e-05	-	Similar to RF12 protein (Fragment)	Genetic Information Processing	Translation	ko03010//Ribosome	K02981	GO:0005840//ribosome;GO:0015935//small ribosomal subunit;GO:0022627//cytosolic small ribosomal subunit;GO:1990904//ribonucleoprotein complex	GO:0003723//RNA binding;GO:0003735//structural constituent of ribosome	GO:0006412//translation
Os06g0144800	72	17	61	281	439	267	0.89	0.19	0.73	3.19	5.23	3.84	0.603333	4.08667	2.7599	3.07929e-06	6.29569e-05	-	Similar to GTP-binding protein lepA	-	-	-	-	GO:0005739//mitochondrion;GO:0005743//mitochondrial inner membrane;GO:0005759//mitochondrial matrix;GO:0016020//membrane	GO:0000166//nucleotide binding;GO:0003924//GTPase activity;GO:0005525//GTP binding;GO:0016787//hydrolase activity;GO:0043022//ribosome binding	GO:0006412//translation;GO:0045727//positive regulation of translation
Os03g0197200	0	14	11	287	422	248	0	0.35	0.3	7.31	11.26	7.99	0.216667	8.85333	5.35267	3.1359e-06	6.39832e-05	-	Similar to Sorbitol transporter	-	-	-	-	GO:0005887//integral component of plasma membrane;GO:0016020//membrane;GO:0016021//integral component of membrane	GO:0005351//sugar:proton symporter activity;GO:0022857//transmembrane transporter activity	GO:0046323//glucose import;GO:0055085//transmembrane transport;GO:1902600//hydrogen ion transmembrane transport
Os10g0409400	2	2	65	2715	8520	1798	0.05	0.04	1.53	60.86	200.17	51.01	0.54	104.013	7.58959	3.15326e-06	6.42718e-05	RD22	beta subunit of polygalacturonase 1, Abiotic stress respons	-	-	-	-	-	-	-
Os10g0394000	0	0	0	41	55	32	0	0	0	0.77	1.08	0.76	0.001	0.87	9.76487	3.16286e-06	6.44017e-05	OsGELP106	Similar to GDSL-like Lipase/Acylhydrolase family protein, expressed	-	-	-	-	-	GO:0016787//hydrolase activity;GO:0016788//hydrolase activity, acting on ester bonds	-
Os05g0378900	140	83	133	575	838	549	1.69	0.91	1.78	6.59	9.42	8.21	1.46	8.07333	2.4672	3.16693e-06	6.44189e-05	-	Similar to Golgi transport complex protein-related	-	-	-	-	GO:0005829//cytosol;GO:0017119//Golgi transport complex	GO:0042803//protein homodimerization activity	GO:0006891//intra-Golgi vesicle-mediated transport
Os04g0434300	14	15	17	202	200	121	0.21	0.21	0.25	2.82	2.92	2.14	0.223333	2.62667	3.55596	3.37118e-06	6.84342e-05	-	MiaB-like tRNA modifying enzyme, archaeal-type domain containing protein	-	-	-	-	GO:0005783//endoplasmic reticulum;GO:0016021//integral component of membrane	GO:0003824//catalytic activity;GO:0016740//transferase activity;GO:0035596//methylthiotransferase activity;GO:0035598//N6-threonylcarbomyladenosine methylthiotransferase activity;GO:0051536//iron-sulfur cluster binding;GO:0051539//4 iron, 4 sulfur cluster binding	GO:0006400//tRNA modification;GO:0035600//tRNA methylthiolation
Os01g0916600	0	0	0	37	45	41	0	0	0	1.25	1.59	1.77	0.001	1.53667	10.5856	3.4673e-06	7.01715e-05	OsGRP1	RNA recognition motif, glycine rich protein domain containing protein	-	-	-	-	GO:0005739//mitochondrion;GO:1990904//ribonucleoprotein complex	GO:0003676//nucleic acid binding;GO:0003723//RNA binding;GO:0003729//mRNA binding	GO:0006397//mRNA processing;GO:0051252//regulation of RNA metabolic process;GO:0080156//mitochondrial mRNA modification
Os03g0787000	40	14	21	178	246	154	0.99	0.32	0.5	4.04	5.86	4.43	0.603333	4.77667	2.98498	3.62195e-06	7.30792e-05	-	Similar to Syntaxin	Genetic Information Processing	Folding, sorting and degradation	ko04130//SNARE interactions in vesicular transport	K08486	GO:0005886//plasma membrane;GO:0012505//endomembrane system;GO:0016020//membrane;GO:0016021//integral component of membrane;GO:0031201//SNARE complex	GO:0000149//SNARE binding;GO:0005484//SNAP receptor activity	GO:0006886//intracellular protein transport;GO:0006887//exocytosis;GO:0006906//vesicle fusion;GO:0016192//vesicle-mediated transport;GO:0048278//vesicle docking
Os09g0460400	727	234	286	108	102	288	19.34	5.71	7.36	2.65	2.62	8.93	10.8033	4.73333	-1.19055	3.71711e-06	7.49235e-05	-	Alpha/beta hydrolase fold-3 domain containing protein	-	-	-	-	-	GO:0016787//hydrolase activity	GO:0009056//catabolic process
Os04g0613600	13	6	13	89	178	101	0.5	0.22	0.46	3.1	6.48	4.43	0.393333	4.67	3.5696	3.75109e-06	7.55323e-05	-	Similar to 40S ribosomal protein S11	Genetic Information Processing	Translation	ko03010//Ribosome	K02949	GO:0005840//ribosome;GO:0022627//cytosolic small ribosomal subunit	GO:0003735//structural constituent of ribosome	GO:0006412//translation
Os08g0503200	858	359	882	2640	2670	2761	9.1	3.5	9.05	25.8	27.35	34.16	7.21667	29.1033	2.01178	3.75752e-06	7.55855e-05	-	PLC-like phosphodiesterase, TIM beta/alpha-barrel domain domain containing protein	-	-	-	-	-	GO:0008081//phosphoric diester hydrolase activity;GO:0008889//glycerophosphodiester phosphodiesterase activity	GO:0006629//lipid metabolic process
Os02g0205000	25	16	27	197	154	177	0.66	0.39	0.69	4.78	3.91	5.43	0.58	4.70667	3.02058	3.78134e-06	7.59881e-05	-	Ribosomal protein L19 family protein	-	-	-	-	GO:0005840//ribosome	GO:0003735//structural constituent of ribosome	GO:0006412//translation
Os03g0337900	143	34	99	457	491	449	2.15	0.47	1.44	6.33	7.13	7.87	1.35333	7.11	2.39333	3.89267e-06	7.80683e-05	-	Similar to predicted protein	Metabolism;Metabolism;Metabolism;Metabolism;Metabolism	Global and overview maps;Global and overview maps;Global and overview maps;Carbohydrate metabolism;Carbohydrate metabolism	ko01100//Metabolic pathways;ko01110//Biosynthesis of secondary metabolites;ko01200//Carbon metabolism;ko00620//Pyruvate metabolism;ko00020//Citrate cycle (TCA cycle)	K01679;K01679;K01679;K01679;K01679	GO:0005739//mitochondrion;GO:0045239//tricarboxylic acid cycle enzyme complex	GO:0003824//catalytic activity;GO:0004333//fumarate hydratase activity;GO:0016829//lyase activity	GO:0006099//tricarboxylic acid cycle;GO:0006106//fumarate metabolic process;GO:0006108//malate metabolic process
Os11g0227800	65	13	204	1111	1169	1077	0.57	0.11	1.74	9.01	9.93	11.05	0.806667	9.99667	3.6314	3.95893e-06	7.92381e-05	-	NB-ARC domain containing protein	Organismal Systems	Environmental adaptation	ko04626//Plant-pathogen interaction	K13457	-	GO:0000166//nucleotide binding;GO:0005524//ATP binding;GO:0043531//ADP binding	GO:0006952//defense response
Os04g0369600	9	17	80	615	901	339	0.23	0.4	2	14.56	22.36	10.15	0.876667	15.69	4.16167	4.04159e-06	8.07307e-05	-	Similar to OSIGBa0107E14.3 protein	-	-	-	-	-	GO:0005509//calcium ion binding;GO:0030247//polysaccharide binding	-
Os04g0370100	18	16	44	241	415	185	0.2	0.16	0.48	2.49	4.49	2.42	0.28	3.13333	3.4842	4.05541e-06	8.09259e-05	OsWAK46	Similar to OSIGBa0107E14.7 protein	-	-	-	-	GO:0005886//plasma membrane;GO:0016020//membrane;GO:0016021//integral component of membrane	GO:0004672//protein kinase activity;GO:0004674//protein serine/threonine kinase activity;GO:0005509//calcium ion binding;GO:0005524//ATP binding;GO:0030247//polysaccharide binding	GO:0006468//protein phosphorylation;GO:0007166//cell surface receptor signaling pathway
Os08g0143600	6	8	7	118	85	130	0.11	0.13	0.12	1.92	1.45	2.67	0.12	2.01333	4.06848	4.06118e-06	8.09601e-05	OsDAD1	Similar to Avr9/Cf-9 rapidly elicited protein 14 (Fragment)	-	-	-	-	-	GO:0004620//phospholipase activity	GO:0006629//lipid metabolic process
Os10g0495600	0	0	0	29	53	43	0	0	0	0.18	0.35	0.34	0.001	0.29	8.17991	4.0758e-06	8.10898e-05	-	Similar to DNA-directed RNA polymerase	Genetic Information Processing	Transcription	ko03020//RNA polymerase	K03002	GO:0005634//nucleus;GO:0005736//DNA-directed RNA polymerase I complex;GO:0005829//cytosol	GO:0003677//DNA binding;GO:0003899//DNA-directed RNA polymerase activity;GO:0032549//ribonucleoside binding	GO:0006351//transcription, DNA-templated;GO:0006360//transcription from RNA polymerase I promoter;GO:0009561//megagametogenesis
Os04g0561700	1	1	10	108	104	92	0.01	0.01	0.14	1.47	1.48	1.59	0.0533333	1.51333	4.82655	4.08165e-06	8.11253e-05	-	Similar to H0211B05.2 protein	-	-	-	-	-	GO:0003723//RNA binding;GO:0009982//pseudouridine synthase activity	GO:0001522//pseudouridine synthesis;GO:0009451//RNA modification;GO:0031119//tRNA pseudouridine synthesis
Os05g0481100	333	272	305	1837	2399	1612	3.99	2.95	3.24	17.06	21.8	20.6	3.39333	19.82	2.54618	4.09271e-06	8.12643e-05	-	Similar to cDNA clone:J013034D11, full insert sequence	-	-	-	-	GO:0016020//membrane;GO:0016021//integral component of membrane	GO:0000166//nucleotide binding;GO:0004672//protein kinase activity;GO:0004674//protein serine/threonine kinase activity;GO:0005515//protein binding;GO:0005524//ATP binding;GO:0016301//kinase activity;GO:0016740//transferase activity	GO:0006468//protein phosphorylation;GO:0016310//phosphorylation
Os09g0533300	0	0	0	96	61	12	0	0	0	1.81	1.22	0.29	0.001	1.10667	10.112	4.12965e-06	8.19163e-05	-	Metallophosphoesterase domain containing protein	-	-	-	-	-	GO:0016787//hydrolase activity;GO:0016788//hydrolase activity, acting on ester bonds	-
Os12g0182300	223	71	208	733	727	749	1.83	0.54	1.66	5.56	5.78	7.18	1.34333	6.17333	2.20023	4.16548e-06	8.25451e-05	-	Protein kinase, core domain containing protein	-	-	-	-	GO:0005886//plasma membrane;GO:0016020//membrane;GO:0016021//integral component of membrane	GO:0004672//protein kinase activity;GO:0005515//protein binding;GO:0005524//ATP binding	GO:0006468//protein phosphorylation
Os04g0194500	46	17	117	499	630	475	0.4	0.14	0.99	4.02	5.33	4.85	0.51	4.73333	3.21429	4.1912e-06	8.29109e-05	OsABCG8	Similar to ABC transporter-like protein	-	-	-	-	GO:0005886//plasma membrane;GO:0016021//integral component of membrane	GO:0000166//nucleotide binding;GO:0005524//ATP binding;GO:0016887//ATPase activity;GO:0042626//ATPase activity, coupled to transmembrane movement of substances	GO:0055085//transmembrane transport
Os08g0558200	2754	1013	1636	671	373	1397	60.84	20.54	34.97	13.65	7.95	35.98	38.7833	19.1933	-1.01483	4.19224e-06	8.29109e-05	OsGRX20	Thioredoxin fold domain containing protein	-	-	-	-	GO:0009507//chloroplast	GO:0005515//protein binding	-
Os04g0117900	63	14	235	1321	1690	1085	1.09	0.22	3.94	21.07	28.26	21.91	1.75	23.7467	3.7623	4.19939e-06	8.29702e-05	OsAMI2	Amidase family protein	Metabolism;Metabolism;Metabolism;Metabolism	Global and overview maps;Amino acid metabolism;Amino acid metabolism;Amino acid metabolism	ko01100//Metabolic pathways;ko00380//Tryptophan metabolism;ko00330//Arginine and proline metabolism;ko00360//Phenylalanine metabolism	K01426;K01426;K01426;K01426	-	GO:0004040//amidase activity	-
Os02g0208500	66	63	50	6	1	20	2.91	2.55	2.13	0.24	0.04	1.03	2.53	0.436667	-2.53453	4.22696e-06	8.32678e-05	OsCDT4	Conserved hypothetical protein	-	-	-	-	-	-	-
Os03g0113100	12	8	9	113	98	111	0.28	0.17	0.2	2.41	2.2	3	0.216667	2.53667	3.54938	4.25464e-06	8.37305e-05	TK	Similar to Thymidine kinase	Metabolism;Metabolism	Global and overview maps;Nucleotide metabolism	ko01100//Metabolic pathways;ko00240//Pyrimidine metabolism	K00857;K00857	-	GO:0000166//nucleotide binding;GO:0004797//thymidine kinase activity;GO:0005524//ATP binding;GO:0016301//kinase activity;GO:0016740//transferase activity;GO:0042802//identical protein binding	GO:0006302//double-strand break repair;GO:0009157//deoxyribonucleoside monophosphate biosynthetic process;GO:0010225//response to UV-C;GO:0016310//phosphorylation;GO:0071897//DNA biosynthetic process
Os03g0664800	4	0	6	97	103	49	0.14	0	0.2	3.08	3.43	1.97	0.113333	2.82667	4.64046	4.38203e-06	8.59833e-05	-	Acyl-CoA N-acyltransferase domain containing protein	-	-	-	-	-	GO:0008080//N-acetyltransferase activity;GO:0016740//transferase activity;GO:0016747//transferase activity, transferring acyl groups other than amino-acyl groups	-
Os03g0758800	352	130	302	963	1046	1052	11.04	3.74	9.16	27.81	31.66	38.45	7.98	32.64	2.03218	4.46713e-06	8.73102e-05	eIF-5A-2	Similar to Eukaryotic translation initiation factor 5A-2 (eIF-5A-2) (eIF-4D)	-	-	-	-	-	GO:0003723//RNA binding;GO:0003743//translation initiation factor activity;GO:0003746//translation elongation factor activity;GO:0043022//ribosome binding	GO:0006412//translation;GO:0006413//translational initiation;GO:0006452//translational frameshifting;GO:0045901//positive regulation of translational elongation;GO:0045905//positive regulation of translational termination
Os07g0516900	4	0	10	115	76	106	0.11	0	0.25	2.72	1.89	3.17	0.12	2.59333	4.4337	4.57523e-06	8.90742e-05	-	Similar to RNA Binding Protein 45	-	-	-	-	GO:0005829//cytosol	GO:0003676//nucleic acid binding;GO:0003723//RNA binding;GO:0003729//mRNA binding	-
Os06g0308000	120	29	160	640	619	669	1.86	0.41	2.4	9.14	9.27	12.1	1.55667	10.17	2.70779	4.68843e-06	9.11006e-05	OsTIG	Similar to Trigger factor-like protein	-	-	-	-	GO:0009507//chloroplast;GO:0009570//chloroplast stroma;GO:0009941//chloroplast envelope	GO:0003755//peptidyl-prolyl cis-trans isomerase activity;GO:0043022//ribosome binding;GO:0044183//protein binding involved in protein folding	GO:0000413//protein peptidyl-prolyl isomerization;GO:0006457//protein folding;GO:0015031//protein transport;GO:0043335//protein unfolding;GO:0051083//'de novo' cotranslational protein folding;GO:0061077//chaperone-mediated protein folding
Os04g0183500	12	0	12	105	146	106	0.2	0	0.2	1.61	2.34	2.05	0.133333	2	3.90689	4.74408e-06	9.20924e-05	-	Similar to OSIGBa0140C02.6 protein	Metabolism;Metabolism;Metabolism;Metabolism	Global and overview maps;Amino acid metabolism;Amino acid metabolism;Amino acid metabolism	ko01100//Metabolic pathways;ko00380//Tryptophan metabolism;ko00330//Arginine and proline metabolism;ko00360//Phenylalanine metabolism	K01426;K01426;K01426;K01426	-	-	-
Os12g0608600	75	42	74	315	388	320	1.5	0.77	1.45	5.79	7.34	7.44	1.24	6.85667	2.46717	4.7875e-06	9.2845e-05	STR22	Similar to Thiosulfate sulfurtransferase (EC 2.8.1.1) (Mercaptopyruvate sulfurtransferase Mst2/Rdh2) (EC 2.8.1.2)	Metabolism;Metabolism;Metabolism;Genetic Information Processing	Global and overview maps;Amino acid metabolism;Energy metabolism;Folding, sorting and degradation	ko01100//Metabolic pathways;ko00270//Cysteine and methionine metabolism;ko00920//Sulfur metabolism;ko04122//Sulfur relay system	K01011;K01011;K01011;K01011	GO:0005739//mitochondrion	GO:0004792//thiosulfate sulfurtransferase activity	GO:0019346//transsulfuration
Os05g0147400	32	17	11	191	185	202	0.67	0.24	0.27	3.58	3.58	4.08	0.393333	3.74667	3.25178	4.86386e-06	9.42343e-05	-	Similar to T-complex protein 1, zeta subunit (TCP-1-zeta) (CCT-zeta) (CCT-zeta-1) (Tcp20) (HTR3) (Acute morphine dependence related protein 2)	-	-	-	-	GO:0005737//cytoplasm;GO:0005832//chaperonin-containing T-complex	GO:0000166//nucleotide binding;GO:0005524//ATP binding;GO:0051082//unfolded protein binding	GO:0006457//protein folding
MSTRG.9282	1284	271	1185	235	132	561	15.42	2.99	13.76	2.6	1.53	7.85	10.7233	3.99333	-1.42509	4.95539e-06	9.57292e-05	LOC_Os12g27220	spermidine hydroxycinnamoyltransferase 1 [Oryza sativa Japonica Group]	-	-	-	-	-	GO:0016746//transferase activity, transferring acyl groups	-
Os02g0103700	53	36	37	241	370	307	1.72	1.07	1.16	7.23	11.62	11.64	1.31667	10.1633	2.94841	4.96211e-06	9.57663e-05	-	Similar to 60S ribosomal protein L9 (Gibberellin-regulated protein GA)	Genetic Information Processing	Translation	ko03010//Ribosome	K02940	GO:0005840//ribosome;GO:0022625//cytosolic large ribosomal subunit	GO:0003735//structural constituent of ribosome;GO:0019843//rRNA binding	GO:0002181//cytoplasmic translation;GO:0006412//translation
Os01g0642900	0	0	0	33	51	36	0	0	0	0.99	1.58	1.36	0.001	1.31	10.3554	5.01664e-06	9.67254e-05	SSB	Nucleic acid-binding, OB-fold domain containing protein	Genetic Information Processing;Genetic Information Processing;Genetic Information Processing	Replication and repair;Replication and repair;Replication and repair	ko03440//Homologous recombination;ko03030//DNA replication;ko03430//Mismatch repair	K03111;K03111;K03111	GO:0005739//mitochondrion;GO:0009295//nucleoid;GO:0042645//mitochondrial nucleoid	GO:0003677//DNA binding;GO:0003697//single-stranded DNA binding	GO:0006260//DNA replication;GO:0006264//mitochondrial DNA replication;GO:0051096//positive regulation of helicase activity
Os10g0524600	237	73	52	15	6	45	2.77	0.78	0.59	0.16	0.07	0.61	1.38	0.28	-2.30117	5.04604e-06	9.71983e-05	OsSub61	Peptidase S8, subtilisin-related domain containing protein	-	-	-	-	-	GO:0004252//serine-type endopeptidase activity;GO:0008233//peptidase activity;GO:0008236//serine-type peptidase activity;GO:0016787//hydrolase activity	GO:0006508//proteolysis
Os11g0703900	5951	1845	6291	22650	26915	16863	74.27	21.14	75.96	260.37	324.29	245.33	57.1233	276.663	2.27598	5.08739e-06	9.79004e-05	HSP70	Heat shock protein 70	Genetic Information Processing;Genetic Information Processing;Cellular Processes	Folding, sorting and degradation;Transcription;Transport and catabolism	ko04141//Protein processing in endoplasmic reticulum;ko03040//Spliceosome;ko04144//Endocytosis	K03283;K03283;K03283	GO:0005737//cytoplasm	GO:0000166//nucleotide binding;GO:0005524//ATP binding;GO:0016887//ATPase activity;GO:0031072//heat shock protein binding;GO:0042623//ATPase activity, coupled;GO:0044183//protein binding involved in protein folding;GO:0051082//unfolded protein binding;GO:0051787//misfolded protein binding	GO:0006986//response to unfolded protein;GO:0034605//cellular response to heat;GO:0034620//cellular response to unfolded protein;GO:0042026//protein refolding;GO:0051085//chaperone mediated protein folding requiring cofactor
MSTRG.24927	105606	90584	52391	7278	33423	45952	2174.51	1711.94	1043.66	138.02	664.37	1102.92	1643.37	635.103	-1.37159	5.11849e-06	9.8404e-05	rbcL	ribulose-1,5-bisphosphate carboxylase/oxygenase large subunit [Oryza sativa Indica Group]	Metabolism;Metabolism;Metabolism;Metabolism;Metabolism	Global and overview maps;Global and overview maps;Global and overview maps;Energy metabolism;Carbohydrate metabolism	ko01100//Metabolic pathways;ko01110//Biosynthesis of secondary metabolites;ko01200//Carbon metabolism;ko00710//Carbon fixation in photosynthetic organisms;ko00630//Glyoxylate and dicarboxylate metabolism	K01601;K01601;K01601;K01601;K01601	GO:0009536//plastid	GO:0016491//oxidoreductase activity;GO:0016831//carboxy-lyase activity;GO:0043169//cation binding	GO:0015977//carbon fixation;GO:0043094//cellular metabolic compound salvage
Os03g0237000	988	320	981	3060	3863	2842	12.22	3.63	11.74	34.85	46.12	40.97	9.19667	40.6467	2.14395	5.16286e-06	9.91616e-05	-	Nonaspanin (TM9SF) family protein	-	-	-	-	GO:0016020//membrane;GO:0016021//integral component of membrane	-	GO:0072657//protein localization to membrane
Os03g0109600	34	13	66	303	363	244	1.34	0.41	2.31	10.37	13.17	11.76	1.35333	11.7667	3.12012	5.2002e-06	9.97829e-05	Osj3g1BTF3	Similar to Transcription factor homolog BTF3-like protein	-	-	-	-	GO:0005829//cytosol;GO:0005854//nascent polypeptide-associated complex;GO:0042788//polysomal ribosome	-	GO:0009651//response to salt stress
Os03g0363100	0	0	0	76	25	34	0	0	0	0.81	0.28	0.46	0.001	0.516667	9.01309	5.21928e-06	0.000100053	-	Armadillo-like helical domain containing protein	-	-	-	-	GO:0016020//membrane;GO:0016021//integral component of membrane	-	-
Os02g0550600	138	58	131	503	662	436	1.67	0.65	1.54	5.62	7.75	6.16	1.28667	6.51	2.33902	5.3112e-06	0.00010162	OsNIN8	Plant neutral invertase family protein	-	-	-	-	GO:0005737//cytoplasm;GO:0005829//cytosol	GO:0003824//catalytic activity;GO:0004564//beta-fructofuranosidase activity;GO:0004575//sucrose alpha-glucosidase activity;GO:0016787//hydrolase activity;GO:0016798//hydrolase activity, acting on glycosyl bonds;GO:0033926//glycopeptide alpha-N-acetylgalactosaminidase activity	GO:0005975//carbohydrate metabolic process;GO:0005987//sucrose catabolic process;GO:0008152//metabolic process;GO:0009555//pollen development;GO:0010311//lateral root formation;GO:0048510//regulation of timing of transition from vegetative to reproductive phase;GO:0080022//primary root development
Os12g0278800	206	77	198	772	692	645	3.14	1.11	2.89	10.81	10.32	11.49	2.38	10.8733	2.19176	5.32776e-06	0.000101717	OsC3H65	Similar to Zinc finger CCCH type domain containing protein ZFN-like 1. Splice isoform 3	-	-	-	-	-	GO:0003677//DNA binding;GO:0046872//metal ion binding	-
Os09g0112400	16	3	16	97	154	113	0.64	0.11	0.62	3.56	5.93	5.25	0.456667	4.91333	3.42749	5.33156e-06	0.000101717	-	Similar to DCL protein, chloroplast precursor (Defective chloroplasts and leaves protein)	-	-	-	-	GO:0009507//chloroplast	-	GO:0009658//chloroplast organization;GO:1901259//chloroplast rRNA processing
Os07g0541800	0	0	0	26	64	37	0	0	0	0.33	0.85	0.59	0.001	0.59	9.20457	5.35933e-06	0.000102149	-	Similar to KI domain interacting kinase 1	-	-	-	-	GO:0005886//plasma membrane;GO:0016021//integral component of membrane	GO:0004672//protein kinase activity;GO:0004674//protein serine/threonine kinase activity;GO:0005524//ATP binding	GO:0006468//protein phosphorylation
Os02g0767500	864	359	669	2322	2850	2154	15.92	6.07	11.93	39.42	50.71	46.28	11.3067	45.47	2.00774	5.40157e-06	0.000102856	OsPT15	Mitochondrial phosphate transporter	-	-	-	-	GO:0016020//membrane;GO:0016021//integral component of membrane;GO:0031305//integral component of mitochondrial inner membrane;GO:0032592//integral component of mitochondrial membrane	GO:0005315//inorganic phosphate transmembrane transporter activity	GO:0035435//phosphate ion transmembrane transport
Os04g0641000	31	0	18	282	188	220	0.22	0	0.12	1.82	1.28	1.8	0.113333	1.63333	3.84918	5.41145e-06	0.000102946	-	Similar to DNA-directed RNA polymerase	-	-	-	-	GO:0005665//DNA-directed RNA polymerase II, core complex	GO:0003677//DNA binding;GO:0003899//DNA-directed RNA polymerase activity;GO:0016740//transferase activity;GO:0016779//nucleotidyltransferase activity;GO:0032549//ribonucleoside binding	GO:0006351//transcription, DNA-templated;GO:0006366//transcription from RNA polymerase II promoter
[truncated: 1,795 more rows]

## Sheet:  ZJ22b-vs-zj-esb
All significantly expressed genes between ZJ22b and zj-esb.
id	ZJ22b1_count	ZJ22b2_count	ZJ22b3_count	zj-esb1_count	zj-esb2_count	zj-esb3_count	ZJ22b1_fpkm	ZJ22b2_fpkm	ZJ22b3_fpkm	zj-esb1_fpkm	zj-esb2_fpkm	zj-esb3_fpkm	ZJ22b_mean	zj-esb_mean	log2(fc)	PValue	FDR	Symbol	Description	KEGG_A_class	KEGG_B_class	Pathway	K_ID	GO Component	GO Function	GO Process
[truncated: 5,471 more rows]

## Sheet:  ZJ22c-vs-zj-esc
All significantly expressed genes between ZJ22c and zj-esc.
id	ZJ22c1_count	ZJ22c2_count	ZJ22c3_count	zj-esc1_count	zj-esc2_count	zj-esc3_count	ZJ22c1_fpkm	ZJ22c2_fpkm	ZJ22c3_fpkm	zj-esc1_fpkm	zj-esc2_fpkm	zj-esc3_fpkm	ZJ22c_mean	zj-esc_mean	log2(fc)	PValue	FDR	Symbol	Description	KEGG_A_class	KEGG_B_class	Pathway	K_ID	GO Component	GO Function	GO Process
[truncated: 5,359 more rows]

## Sheet: zj-esa-vs-zj-esb
All significantly expressed genes between zj-esa and zj-esb.
[truncated: 3,737 more rows]

[truncated: 5 more sheets:  zj-esa-vs-zj-esc,  zj-esb-vs-zj-esc,  ZJ22a-vs-ZJ22b,  ZJ22a-vs-ZJ22c,  ZJ22b-vs-ZJ22c]
