# Supplementary material for: Whole-Transcriptome Analysis Reveals Autophagy Is Involved in Early Senescence of zj-es Mutant Rice
Source: Front Plant Sci. 2022 Jun 3;13:899054. doi: 10.3389/fpls.2022.899054 (PMC9204060; doi:10.3389/fpls.2022.899054)
Supplement: Supplementary file 11 [file Table_11.XLSX]

## Sheet: ZJ22a-vs-zj-esa
All enrichment GO terms of mRNAs of the comparison between ZJ22a and zj-esa.
GO ID (level1)	GO Term (level1)	GO ID (level2)	GO Term (level2)	number_of_ZJ22a-vs-Pir1a (up)	number_of_ZJ22a-vs-Pir1a (down)	Genes_of_ZJ22a-vs-Pir1a_up	Genes_of_ZJ22a-vs-Pir1a_down
GO:0008150	Biological Process	GO:0051704	multi-organism process	75	8	MSTRG.25968(JUB1),MSTRG.7572(BAK1),Os01g0134700(-),Os01g0155200(-),Os01g0194300(NH1),Os01g0327600(-),Os01g0510100(OsMKK6),Os01g0668901(-),Os01g0669100(OsLSK1),Os01g0670100(-),Os01g0686800(RACK1),Os02g0115700(CATA1),Os02g0208900(-),Os02g0327000(OsGAP1),Os02g0712600(-),Os02g0712700(-),Os02g0831800(-),Os03g0108600(OsRH50),Os03g0195100(OsALD1),Os03g0285800(OsMSRMK2),Os03g0299900(OsAGD2),Os03g0422800(…	Os01g0849000(OsLTPd5),Os03g0229500(-),Os03g0760500(-),Os04g0419700(-),Os04g0632901(-),Os05g0160300(OsLTPd8),Os06g0165500(OsRLCK198),Os06g0691400(-)
GO:0008150	Biological Process	GO:0009987	cellular process	1268	184	MSTRG.12170(--),MSTRG.1302(--),MSTRG.14792(SIT2),MSTRG.15447(--),MSTRG.17235(GYRA),MSTRG.18064(rpoC2),MSTRG.19806(MORF2),MSTRG.21456(rpoA),MSTRG.21477(ACC2),MSTRG.23860(--),MSTRG.24228(--),MSTRG.24639(TY3B-I),MSTRG.25008(NRPA1),MSTRG.25061(LYK5),MSTRG.25968(JUB1),MSTRG.26101(snrpb),MSTRG.26284(TY3B-I),MSTRG.2635(ABCB11),MSTRG.27764(RE2),MSTRG.28921(--),MSTRG.29046(--),MSTRG.29379(RE1),MSTRG.31183…	MSTRG.10062(--),MSTRG.10139(RUP1),MSTRG.13264(SAC2),MSTRG.16779(--),MSTRG.18687(--),MSTRG.20485(TY3B-I),MSTRG.23500(--),MSTRG.24064(--),MSTRG.24927(rbcL),MSTRG.25074(--),MSTRG.28560(--),MSTRG.32073(--),MSTRG.4776(KCS1),MSTRG.653(BHLH41),Os01g0120300(-),Os01g0138800(-),Os01g0142300(SQD2.2),Os01g0172100(OsPPT3),Os01g0191200(-),Os01g0213800(OsPCF5),Os01g0236300(OsARF16),Os01g0305900(-),Os01g0357100(…
GO:0008150	Biological Process	GO:0008152	metabolic process	1189	171	MSTRG.12170(--),MSTRG.1302(--),MSTRG.1379(--),MSTRG.14792(SIT2),MSTRG.15447(--),MSTRG.17235(GYRA),MSTRG.18064(rpoC2),MSTRG.18374(--),MSTRG.19806(MORF2),MSTRG.21456(rpoA),MSTRG.21477(ACC2),MSTRG.23860(--),MSTRG.24228(--),MSTRG.24639(TY3B-I),MSTRG.25008(NRPA1),MSTRG.25061(LYK5),MSTRG.25968(JUB1),MSTRG.26101(snrpb),MSTRG.26284(TY3B-I),MSTRG.26888(GIP),MSTRG.27764(RE2),MSTRG.28921(--),MSTRG.29046(--)…	MSTRG.10062(--),MSTRG.13264(SAC2),MSTRG.16779(--),MSTRG.16908(TIC214),MSTRG.18687(--),MSTRG.20485(TY3B-I),MSTRG.23500(--),MSTRG.24064(--),MSTRG.24927(rbcL),MSTRG.25074(--),MSTRG.28560(--),MSTRG.32073(--),MSTRG.4776(KCS1),MSTRG.653(BHLH41),Os01g0120300(-),Os01g0138800(-),Os01g0142300(SQD2.2),Os01g0191200(-),Os01g0213800(OsPCF5),Os01g0227800(-),Os01g0236300(OsARF16),Os01g0274100(OsYUCCA10),Os01g030…
GO:0008150	Biological Process	GO:0071840	cellular component organization or biogenesis	295	18	MSTRG.19806(MORF2),MSTRG.21477(ACC2),MSTRG.23860(--),MSTRG.26101(snrpb),MSTRG.31256(At5g57480),MSTRG.7572(BAK1),Os01g0100700(RPS5),Os01g0106700(-),Os01g0120800(eIF-3a),Os01g0127300(OsABCI4),Os01g0143300(-),Os01g0143800(-),Os01g0183100(OsWD40-5),Os01g0184000(-),Os01g0191500(-),Os01g0200500(-),Os01g0205500(-),Os01g0248600(PSF2),Os01g0268300(-),Os01g0311500(OsPHS1a),Os01g0348700(OsRPL23A),Os01g03892…	Os01g0120300(-),Os01g0883800(20ox2),Os02g0217800(-),Os02g0697400(4CL2),Os02g0782500(OsHSP18.0-CIII),Os03g0370400(-),Os03g0820500(OsADF3),Os03g0844900(-),Os04g0195000(OsWD40-99),Os05g0244500(-),Os05g0562800(-),Os07g0691200(-),Os08g0174500(HD5),Os08g0467300(-),Os09g0450300(-),Os11g0592300(-),Os12g0628100(OsADF11),Os12g0632900(-)
GO:0008150	Biological Process	GO:0002376	immune system process	19	3	MSTRG.25968(JUB1),MSTRG.7572(BAK1),Os01g0134700(-),Os01g0194300(NH1),Os01g0327600(-),Os02g0327000(OsGAP1),Os03g0108600(OsRH50),Os03g0172000(MOS3/SAR3),Os03g0195100(OsALD1),Os03g0270000(-),Os03g0299900(OsAGD2),Os03g0721200(-),Os04g0379600(-),Os04g0457800(OsSERK2),Os05g0156500(OsDjB6),Os07g0290200(OsLTPd4),Os10g0466300(OsWD40-178),Os10g0580900(-),Os11g0195500(PAD4)	Os01g0849000(OsLTPd5),Os05g0160300(OsLTPd8),Os06g0691400(-)
GO:0008150	Biological Process	GO:0098754	detoxification	31	0	Os01g0326100(RP-2),Os01g0327400(prx16),Os01g0962700(prx20),Os01g0963000(prx22),Os02g0115700(CATA1),Os02g0240100(prx30),Os02g0240300(prx29),Os03g0709000(-),Os04g0688100(prx59),Os04g0688200(prx60),Os04g0688300(prx61),Os04g0688500(prx62),Os05g0323900(SODA1),Os06g0196900(-),Os06g0522300(prx81),Os06g0547400(prx86),Os06g0625500(OsPrxII),Os06g0727200(CATB),Os07g0676900(prx109),Os07g0677200(POX22.3),Os07…	--
GO:0008150	Biological Process	GO:0050896	response to stimulus	311	47	MSTRG.21477(ACC2),MSTRG.23860(--),MSTRG.24228(--),MSTRG.25968(JUB1),MSTRG.31256(At5g57480),MSTRG.4652(MIK2),MSTRG.7572(BAK1),Os01g0106700(-),Os01g0118000(-),Os01g0134700(-),Os01g0194300(NH1),Os01g0197700(Gn1a),Os01g0232700(-),Os01g0248600(PSF2),Os01g0266000(-),Os01g0267900(OsCam1-3),Os01g0311500(OsPHS1a),Os01g0326100(RP-2),Os01g0327400(prx16),Os01g0327600(-),Os01g0358100(OsRALF-6),Os01g0364800(Os…	MSTRG.10139(RUP1),MSTRG.653(BHLH41),Os01g0236300(OsARF16),Os01g0547600(NRT2.4),Os01g0639900(BETACA1),Os01g0849000(OsLTPd5),Os01g0883800(20ox2),Os02g0110200(HPL3),Os02g0629200(OsPIP2),Os02g0743400(PIN1A),Os02g0782500(OsHSP18.0-CIII),Os02g0794500(OsSCP10),Os03g0229500(-),Os03g0232400(-),Os03g0242200(-),Os03g0268600(OsPP2C30),Os03g0273200(Lac),Os03g0292700(-),Os03g0760500(-),Os03g0782500(PIL13),Os03…
GO:0008150	Biological Process	GO:0040011	locomotion	3	1	Os03g0285800(OsMSRMK2),Os03g0765400(-),Os10g0370500(-)	Os05g0244500(-)
GO:0008150	Biological Process	GO:0044699	single-organism process	810	152	MSTRG.17235(GYRA),MSTRG.19806(MORF2),MSTRG.21477(ACC2),MSTRG.23860(--),MSTRG.25968(JUB1),MSTRG.26101(snrpb),MSTRG.2635(ABCB11),MSTRG.31256(At5g57480),MSTRG.3363(CYP94B1),MSTRG.3364(CYP94B1),MSTRG.4652(MIK2),MSTRG.7572(BAK1),Os01g0103600(-),Os01g0106700(-),Os01g0118000(-),Os01g0127300(OsABCI4),Os01g0130000(OsMTP9),Os01g0134700(-),Os01g0143300(-),Os01g0143800(-),Os01g0155200(-),Os01g0173900(OsABCC3…	MSTRG.10139(RUP1),MSTRG.13264(SAC2),MSTRG.16908(TIC214),MSTRG.24927(rbcL),MSTRG.4776(KCS1),Os01g0120300(-),Os01g0138800(-),Os01g0142300(SQD2.2),Os01g0172100(OsPPT3),Os01g0175700(BOR2),Os01g0213800(OsPCF5),Os01g0227800(-),Os01g0236300(OsARF16),Os01g0274100(OsYUCCA10),Os01g0305900(-),Os01g0357100(NiR),Os01g0368900(OsGRX4),Os01g0547600(NRT2.4),Os01g0585100(-),Os01g0606000(OsSWEET6a),Os01g0639900(BET…
GO:0008150	Biological Process	GO:0032501	multicellular organismal process	97	17	MSTRG.19806(MORF2),MSTRG.25968(JUB1),MSTRG.26101(snrpb),MSTRG.7572(BAK1),Os01g0127300(OsABCI4),Os01g0155200(-),Os01g0185200(-),Os01g0197700(Gn1a),Os01g0232700(-),Os01g0375000(Os_F0781),Os01g0510100(OsMKK6),Os01g0549700(AIP1),Os01g0550000(AIP2),Os01g0592900(-),Os01g0617500(-),Os01g0653800(-),Os01g0668901(-),Os01g0669100(OsLSK1),Os01g0670100(-),Os01g0958900(OsMLH1),Os02g0100700(-),Os02g0139200(OsPR…	Os01g0120300(-),Os01g0213800(OsPCF5),Os01g0883800(20ox2),Os01g0952100(OsGLP1-5),Os02g0697400(4CL2),Os02g0743400(PIN1A),Os03g0229500(-),Os03g0268600(OsPP2C30),Os03g0782500(PIL13),Os04g0419700(-),Os04g0632901(-),Os06g0165500(OsRLCK198),Os06g0601500(OsbZIP48),Os08g0174500(HD5),Os08g0472800(OsABA8OX2),Os09g0546900(OsSAUR53),Os12g0632900(-)
GO:0008150	Biological Process	GO:0040007	growth	14	5	Os01g0612700(LOL2),Os02g0100700(-),Os04g0457800(OsSERK2),Os04g0484900(OsHAG703),Os05g0421900(GA20OX4),Os06g0600400(OsCYP734A4),Os06g0716700(GRP94),Os07g0209000(OsDGL1),Os07g0563700(-),Os07g0597200(-),Os07g0660700(OsWD40-149),Os08g0191000(OsPILS2),Os08g0451000(-),Os09g0123200(OsFCA)	Os01g0883800(20ox2),Os04g0668800(-),Os08g0108100(-),Os08g0174500(HD5),Os09g0546900(OsSAUR53)
GO:0008150	Biological Process	GO:0022414	reproductive process	67	6	MSTRG.21477(ACC2),MSTRG.23860(--),MSTRG.7572(BAK1),Os01g0127300(OsABCI4),Os01g0155200(-),Os01g0185200(-),Os01g0197700(Gn1a),Os01g0375000(Os_F0781),Os01g0510100(OsMKK6),Os01g0549700(AIP1),Os01g0550000(AIP2),Os01g0617500(-),Os01g0668901(-),Os01g0669100(OsLSK1),Os01g0670100(-),Os01g0958900(OsMLH1),Os02g0139200(OsPRMT5),Os02g0592300(OsPMS1),Os02g0633400(RPA2B),Os03g0285800(OsMSRMK2),Os03g0422800(-),O…	Os01g0120300(-),Os01g0883800(20ox2),Os04g0419700(-),Os04g0632901(-),Os06g0165500(OsRLCK198),Os08g0174500(HD5)
GO:0008150	Biological Process	GO:0000003	reproduction	67	6	MSTRG.21477(ACC2),MSTRG.23860(--),MSTRG.7572(BAK1),Os01g0127300(OsABCI4),Os01g0155200(-),Os01g0185200(-),Os01g0197700(Gn1a),Os01g0375000(Os_F0781),Os01g0510100(OsMKK6),Os01g0549700(AIP1),Os01g0550000(AIP2),Os01g0617500(-),Os01g0668901(-),Os01g0669100(OsLSK1),Os01g0670100(-),Os01g0958900(OsMLH1),Os02g0139200(OsPRMT5),Os02g0592300(OsPMS1),Os02g0633400(RPA2B),Os03g0285800(OsMSRMK2),Os03g0422800(-),O…	Os01g0120300(-),Os01g0883800(20ox2),Os04g0419700(-),Os04g0632901(-),Os06g0165500(OsRLCK198),Os08g0174500(HD5)
GO:0008150	Biological Process	GO:0023052	signaling	114	13	MSTRG.4652(MIK2),MSTRG.7572(BAK1),Os01g0106700(-),Os01g0194300(NH1),Os01g0197700(Gn1a),Os01g0267900(OsCam1-3),Os01g0358100(OsRALF-6),Os01g0364800(OsWAK7/8),Os01g0510100(OsMKK6),Os01g0620100(OsWD40-19),Os01g0668901(-),Os01g0686800(RACK1),Os01g0826400(OsWRKY24),Os02g0111600(OsWAK11),Os02g0115900(OsBiP1),Os02g0327000(OsGAP1),Os02g0685900(OsCDPK5),Os02g0699824(-),Os02g0807000(OsPPCK1),Os02g0807800(Os…	Os01g0236300(OsARF16),Os02g0743400(PIN1A),Os02g0794500(OsSCP10),Os03g0232400(-),Os03g0242200(-),Os03g0268600(OsPP2C30),Os03g0292700(-),Os03g0782500(PIL13),Os06g0601500(OsbZIP48),Os08g0109400(OsIAA25),Os08g0374000(OsBetvI),Os08g0446200(-),Os10g0575800(-)
GO:0008150	Biological Process	GO:0051179	localization	206	63	MSTRG.19806(MORF2),MSTRG.25008(NRPA1),MSTRG.2635(ABCB11),MSTRG.7572(BAK1),Os01g0130000(OsMTP9),Os01g0173900(OsABCC3),Os01g0191500(-),Os01g0200500(-),Os01g0209800(OsCAT1),Os01g0235400(-),Os01g0281400(-),Os01g0327600(-),Os01g0337500(-),Os01g0342750(-),Os01g0504100(OsPUP8),Os01g0549700(AIP1),Os01g0588200(OSVDAC3),Os01g0600000(-),Os01g0620100(OsWD40-19),Os01g0645900(OsSultr5),Os01g0648000(OsAKT1),Os0…	Os01g0172100(OsPPT3),Os01g0175700(BOR2),Os01g0547600(NRT2.4),Os01g0606000(OsSWEET6a),Os01g0695700(OsABCB4),Os01g0696100(-),Os01g0711000(-),Os01g0842500(OsLAC5),Os01g0878400(OsAAP10C),Os01g0881300(OsSWEET1a),Os01g0908600(OsProT1),Os01g0952100(OsGLP1-5),Os01g0975900(OsTIP1),Os02g0117500(OsGLR3.1),Os02g0175000(HKT6),Os02g0314300(OsCAX1c),Os02g0318450(-),Os02g0474700(-),Os02g0513100(OsSWEET15),Os02g0…
GO:0008150	Biological Process	GO:0048511	rhythmic process	2	0	Os02g0115700(CATA1),Os06g0727200(CATB)	--
GO:0008150	Biological Process	GO:0032502	developmental process	90	17	MSTRG.19806(MORF2),MSTRG.21477(ACC2),MSTRG.23860(--),MSTRG.25968(JUB1),MSTRG.26101(snrpb),MSTRG.7572(BAK1),Os01g0127300(OsABCI4),Os01g0185200(-),Os01g0197700(Gn1a),Os01g0232700(-),Os01g0375000(Os_F0781),Os01g0510100(OsMKK6),Os01g0549700(AIP1),Os01g0550000(AIP2),Os01g0592900(-),Os01g0617500(-),Os01g0653800(-),Os01g0958900(OsMLH1),Os02g0100700(-),Os02g0139200(OsPRMT5),Os02g0550600(OsNIN8),Os02g0559…	Os01g0120300(-),Os01g0213800(OsPCF5),Os01g0305900(-),Os01g0883800(20ox2),Os01g0952100(OsGLP1-5),Os02g0697400(4CL2),Os02g0743400(PIN1A),Os03g0229500(-),Os03g0268600(OsPP2C30),Os03g0782500(PIL13),Os04g0668800(-),Os06g0258000(R2R3-MYB),Os06g0601500(OsbZIP48),Os08g0174500(HD5),Os08g0472800(OsABA8OX2),Os09g0546900(OsSAUR53),Os12g0632900(-)
GO:0008150	Biological Process	GO:0048518	positive regulation of biological process	70	6	Os01g0134700(-),Os01g0143300(-),Os01g0143800(-),Os01g0194300(NH1),Os01g0510100(OsMKK6),Os01g0612700(LOL2),Os01g0620100(OsWD40-19),Os01g0642900(SSB),Os01g0686800(RACK1),Os01g0746200(NUP85),Os01g0826400(OsWRKY24),Os01g0942900(-),Os01g0943800(-),Os02g0134300(OsTEF1),Os02g0139200(OsPRMT5),Os02g0208900(-),Os02g0327000(OsGAP1),Os02g0633400(RPA2B),Os02g0717400(-),Os02g0732700(OsMed23_1),Os02g0805200(OsP…	Os03g0292700(-),Os03g0782500(PIL13),Os04g0541700(HOX22),Os08g0174500(HD5),Os11g0602600(-),Os12g0632900(-)
GO:0008150	Biological Process	GO:0048519	negative regulation of biological process	50	13	MSTRG.12170(--),MSTRG.15447(--),MSTRG.24639(TY3B-I),MSTRG.25968(JUB1),MSTRG.26284(TY3B-I),MSTRG.29046(--),MSTRG.31183(--),MSTRG.7689(TY3B-G),MSTRG.7987(XA21),Os01g0106700(-),Os01g0124200(RBBI3-1),Os01g0194300(NH1),Os01g0375000(Os_F0781),Os01g0592900(-),Os01g0615100(OCPI2),Os01g0788400(OsPME6),Os01g0810100(-),Os01g0826400(OsWRKY24),Os01g0856000(OsCDC6),Os01g0909200(OsDCL3a),Os02g0125300(OsBI-1),Os…	MSTRG.10062(--),MSTRG.16779(--),MSTRG.20485(TY3B-I),MSTRG.23500(--),MSTRG.24064(--),MSTRG.25074(--),MSTRG.28560(--),MSTRG.32073(--),Os01g0823500(OsOFP4),Os03g0782500(PIL13),Os08g0108100(-),Os08g0174500(HD5),Os08g0374000(OsBetvI)
GO:0008150	Biological Process	GO:0050789	regulation of biological process	313	43	MSTRG.12170(--),MSTRG.15447(--),MSTRG.17235(GYRA),MSTRG.19806(MORF2),MSTRG.23860(--),MSTRG.24639(TY3B-I),MSTRG.25968(JUB1),MSTRG.26101(snrpb),MSTRG.26284(TY3B-I),MSTRG.29046(--),MSTRG.31183(--),MSTRG.4652(MIK2),MSTRG.7572(BAK1),MSTRG.7689(TY3B-G),MSTRG.7987(XA21),Os01g0106700(-),Os01g0124200(RBBI3-1),Os01g0131600(OsAP2),Os01g0134700(-),Os01g0141000(AP2/EREBP129),Os01g0143300(-),Os01g0143800(-),Os…	MSTRG.10062(--),MSTRG.16779(--),MSTRG.20485(TY3B-I),MSTRG.23500(--),MSTRG.24064(--),MSTRG.25074(--),MSTRG.28560(--),MSTRG.32073(--),MSTRG.653(BHLH41),Os01g0213800(OsPCF5),Os01g0236300(OsARF16),Os01g0305900(-),Os01g0368900(OsGRX4),Os01g0639900(BETACA1),Os01g0813100(HBF2),Os01g0823500(OsOFP4),Os01g0952100(OsGLP1-5),Os02g0655200(ERF95),Os02g0743400(PIN1A),Os02g0794500(OsSCP10),Os03g0232400(-),Os03g0…
GO:0008150	Biological Process	GO:0065007	biological regulation	342	52	MSTRG.12170(--),MSTRG.15447(--),MSTRG.17235(GYRA),MSTRG.19806(MORF2),MSTRG.23860(--),MSTRG.24639(TY3B-I),MSTRG.25968(JUB1),MSTRG.26101(snrpb),MSTRG.26284(TY3B-I),MSTRG.29046(--),MSTRG.31183(--),MSTRG.4652(MIK2),MSTRG.7572(BAK1),MSTRG.7689(TY3B-G),MSTRG.7987(XA21),Os01g0106700(-),Os01g0124200(RBBI3-1),Os01g0130000(OsMTP9),Os01g0131600(OsAP2),Os01g0134700(-),Os01g0141000(AP2/EREBP129),Os01g0143300(…	MSTRG.10062(--),MSTRG.16779(--),MSTRG.20485(TY3B-I),MSTRG.23500(--),MSTRG.24064(--),MSTRG.25074(--),MSTRG.28560(--),MSTRG.32073(--),MSTRG.653(BHLH41),Os01g0213800(OsPCF5),Os01g0236300(OsARF16),Os01g0305900(-),Os01g0368900(OsGRX4),Os01g0639900(BETACA1),Os01g0696100(-),Os01g0813100(HBF2),Os01g0823500(OsOFP4),Os01g0842500(OsLAC5),Os01g0952100(OsGLP1-5),Os02g0314300(OsCAX1c),Os02g0655200(ERF95),Os02g…
GO:0003674	Molecular Function	GO:0005198	structural molecule activity	181	1	Os01g0100700(RPS5),Os01g0191100(-),Os01g0200500(-),Os01g0205500(-),Os01g0231700(-),Os01g0251100(-),Os01g0276000(-),Os01g0281400(-),Os01g0304000(-),Os01g0328400(RPS27a),Os01g0348700(OsRPL23A),Os01g0358400(RPS4),Os01g0593500(-),Os01g0620100(OsWD40-19),Os01g0679700(-),Os01g0723200(OsRPS24),Os01g0746200(NUP85),Os01g0752300(-),Os01g0815800(BIP123),Os01g0823300(OsRPS26),Os01g0834500(-),Os01g0839300(-),…	Os11g0602600(-)
GO:0003674	Molecular Function	GO:0003824	catalytic activity	917	166	MSTRG.14792(SIT2),MSTRG.17235(GYRA),MSTRG.17710(LECRK43),MSTRG.18064(rpoC2),MSTRG.18359(TPS7),MSTRG.18374(--),MSTRG.19806(MORF2),MSTRG.21456(rpoA),MSTRG.21477(ACC2),MSTRG.23860(--),MSTRG.25008(NRPA1),MSTRG.25061(LYK5),MSTRG.2635(ABCB11),MSTRG.26888(GIP),MSTRG.31256(At5g57480),MSTRG.3363(CYP94B1),MSTRG.3364(CYP94B1),MSTRG.4652(MIK2),MSTRG.5003(UGT83A1),MSTRG.5912(GSTU6),MSTRG.7572(BAK1),MSTRG.7968…	MSTRG.10139(RUP1),MSTRG.12705(ART3),MSTRG.13264(SAC2),MSTRG.16908(TIC214),MSTRG.18687(--),MSTRG.24927(rbcL),MSTRG.4776(KCS1),MSTRG.9282(LOC_Os12g27220),Os01g0113900(-),Os01g0120300(-),Os01g0138800(-),Os01g0142300(SQD2.2),Os01g0175700(BOR2),Os01g0179600(OsUGT75K1),Os01g0191200(-),Os01g0227800(-),Os01g0229600(-),Os01g0274100(OsYUCCA10),Os01g0357100(NiR),Os01g0368900(OsGRX4),Os01g0583100(OsPP2C06/Os…
GO:0003674	Molecular Function	GO:0045182	translation regulator activity	4	0	Os01g0143300(-),Os01g0143800(-),Os05g0456000(-),Os06g0326500(-)	--
GO:0003674	Molecular Function	GO:0016209	antioxidant activity	29	0	Os01g0326100(RP-2),Os01g0327400(prx16),Os01g0962700(prx20),Os01g0963000(prx22),Os02g0115700(CATA1),Os02g0240100(prx30),Os02g0240300(prx29),Os03g0709000(-),Os04g0688100(prx59),Os04g0688200(prx60),Os04g0688300(prx61),Os04g0688500(prx62),Os05g0323900(SODA1),Os06g0522300(prx81),Os06g0547400(prx86),Os06g0625500(OsPrxII),Os06g0727200(CATB),Os07g0676900(prx109),Os07g0677200(POX22.3),Os07g0677500(POX3006…	--
GO:0003674	Molecular Function	GO:0004871	signal transducer activity	38	3	Os01g0510100(OsMKK6),Os01g0668901(-),Os02g0712600(-),Os02g0712700(-),Os03g0225100(MPKK10.2),Os03g0285800(OsMSRMK2),Os03g0297600(OsPYL/RCAR4),Os03g0772600(-),Os03g0773300(-),Os04g0288500(-),Os04g0457800(OsSERK2),Os05g0473000(OsPYL/RCAR6),Os06g0147800(OsMKK1),Os06g0210400(-),Os06g0283300(-),Os06g0288100(PK),Os06g0328400(-),Os06g0663900(OsRLCK212),Os06g0708000(BWMK1),Os07g0129800(-),Os07g0132500(-),…	Os02g0117500(OsGLR3.1),Os08g0374000(OsBetvI),Os12g0632900(-)
GO:0003674	Molecular Function	GO:0005488	binding	1149	138	MSTRG.14792(SIT2),MSTRG.17151(GIP),MSTRG.17235(GYRA),MSTRG.17325(RBM28),MSTRG.18064(rpoC2),MSTRG.18359(TPS7),MSTRG.19806(MORF2),MSTRG.21456(rpoA),MSTRG.21477(ACC2),MSTRG.25008(NRPA1),MSTRG.25061(LYK5),MSTRG.26101(snrpb),MSTRG.28921(--),MSTRG.29379(RE1),MSTRG.31256(At5g57480),MSTRG.3363(CYP94B1),MSTRG.3364(CYP94B1),MSTRG.4081(--),MSTRG.7572(BAK1),MSTRG.7968(Tf2-12),MSTRG.9395(--),Os01g0100700(RPS5…	MSTRG.18687(--),MSTRG.24927(rbcL),MSTRG.653(BHLH41),Os01g0120300(-),Os01g0213800(OsPCF5),Os01g0227800(-),Os01g0236300(OsARF16),Os01g0236700(-),Os01g0274100(OsYUCCA10),Os01g0305900(-),Os01g0357100(NiR),Os01g0583100(OsPP2C06/OsABI2),Os01g0603800(OsSTA22),Os01g0639900(BETACA1),Os01g0695700(OsABCB4),Os01g0711000(-),Os01g0730500(OsDjC13),Os01g0743100(-),Os01g0800500(OsPAP9b),Os01g0823500(OsOFP4),Os01g…
GO:0003674	Molecular Function	GO:0060089	molecular transducer activity	32	3	Os01g0668901(-),Os02g0712600(-),Os02g0712700(-),Os03g0297600(OsPYL/RCAR4),Os03g0772600(-),Os03g0773300(-),Os04g0288500(-),Os04g0457800(OsSERK2),Os05g0473000(OsPYL/RCAR6),Os06g0210400(-),Os06g0283300(-),Os06g0288100(PK),Os06g0328400(-),Os06g0663900(OsRLCK212),Os07g0129800(-),Os07g0132500(-),Os07g0133000(-),Os07g0283125(-),Os07g0569800(-),Os08g0124000(-),Os08g0124500(-),Os08g0124700(-),Os08g0125800…	Os02g0117500(OsGLR3.1),Os08g0374000(OsBetvI),Os12g0632900(-)
GO:0003674	Molecular Function	GO:0005215	transporter activity	101	47	MSTRG.2635(ABCB11),Os01g0130000(OsMTP9),Os01g0173900(OsABCC3),Os01g0209800(OsCAT1),Os01g0337500(-),Os01g0342750(-),Os01g0504100(OsPUP8),Os01g0588200(OSVDAC3),Os01g0600000(-),Os01g0645900(OsSultr5),Os01g0648000(OsAKT1),Os01g0684900(-),Os01g0685800(ATPB),Os01g0733001(-),Os01g0802850(-),Os01g0825800(OsATL7),Os01g0930400(HAK5),Os02g0173800(-),Os02g0208100(OsNTT2),Os02g0574100(-),Os02g0604300(-),Os02g…	Os01g0172100(OsPPT3),Os01g0175700(BOR2),Os01g0547600(NRT2.4),Os01g0606000(OsSWEET6a),Os01g0695700(OsABCB4),Os01g0696100(-),Os01g0711000(-),Os01g0878400(OsAAP10C),Os01g0881300(OsSWEET1a),Os01g0908600(OsProT1),Os01g0975900(OsTIP1),Os02g0117500(OsGLR3.1),Os02g0175000(HKT6),Os02g0314300(OsCAX1c),Os02g0318450(-),Os02g0474700(-),Os02g0513100(OsSWEET15),Os02g0620600(AMT1),Os02g0629200(OsPIP2),Os02g06667…
GO:0003674	Molecular Function	GO:0031386	protein tag	2	0	Os01g0328400(RPS27a),Os05g0160200(S27a)	--
GO:0003674	Molecular Function	GO:0009055	electron carrier activity	12	4	Os01g0337900(-),Os03g0659200(OsFdC1),Os03g0790700(AO),Os03g0835900(OsFd3),Os04g0244400(OsGRX12),Os06g0718400(OsUCL18),Os07g0134800(SDH1),Os08g0137800(OsUCL24),Os08g0137900(OsUCL25),Os08g0482700(OsUCL30),Os09g0572700(OsUCL33),Os12g0175500(OsGRX27)	Os01g0368900(OsGRX4),Os01g0730500(OsDjC13),Os10g0516300(-),gene-psbD(-)
GO:0003674	Molecular Function	GO:0045735	nutrient reservoir activity	5	1	Os02g0532500(OsGLP2-1),Os03g0804500(GER7),Os08g0189500(GLP8-6),Os08g0189600(GLP8-7),Os08g0190100(GLP8-11)	Os01g0952100(OsGLP1-5)
GO:0003674	Molecular Function	GO:0098772	molecular function regulator	25	2	Os01g0124200(RBBI3-1),Os01g0615100(OCPI2),Os01g0788400(OsPME6),Os02g0208900(-),Os02g0327000(OsGAP1),Os02g0805200(OsPCNA),Os03g0297600(OsPYL/RCAR4),Os03g0406200(eEF-1beta2),Os03g0610650(OsSRP-LRS),Os03g0721200(-),Os05g0133100(OsGlnB),Os05g0349500(-),Os05g0350600(-),Os05g0418000(OsGDI1),Os05g0473000(OsPYL/RCAR6),Os06g0698674(-),Os07g0274800(-),Os07g0568700(FOR1),Os07g0614500(eEF-1beta),Os07g0662500…	Os08g0108100(-),Os08g0374000(OsBetvI)
GO:0003674	Molecular Function	GO:0000988	transcription factor activity, protein binding	3	0	Os02g0189100(OsMED11_1),Os06g0274000(OsHSBP2),Os09g0470900(-)	--
GO:0003674	Molecular Function	GO:0001071	nucleic acid binding transcription factor activity	43	10	MSTRG.26101(snrpb),Os01g0131600(OsAP2),Os01g0134700(-),Os01g0141000(AP2/EREBP129),Os01g0714800(OsWRKY26),Os01g0826400(OsWRKY24),Os02g0624300(OsMYB30),Os02g0654700(ERF91),Os03g0183000(OsLG3),Os03g0270000(-),Os03g0321700(OsWRKY55),Os04g0194600(PCF1),Os04g0517100(OsMyb4),Os04g0637000(OsTGAP1),Os05g0183100(OsWRKY67),Os05g0316800(OsERF#056),Os05g0322900(WRKY45),Os05g0343400(WRKY53),Os05g0474800(OsWRKY…	MSTRG.653(BHLH41),Os01g0213800(OsPCF5),Os01g0305900(-),Os01g0813100(HBF2),Os02g0655200(ERF95),Os04g0541700(HOX22),Os05g0572000(OsERF#052),Os06g0258000(R2R3-MYB),Os06g0601500(OsbZIP48),Os10g0371100(OsERF#051)
GO:0005575	Cellular Component	GO:0044422	organelle part	494	34	MSTRG.19806(MORF2),MSTRG.26101(snrpb),MSTRG.9165(DMP6),Os01g0100700(RPS5),Os01g0103600(-),Os01g0118000(-),Os01g0127300(OsABCI4),Os01g0128400(-),Os01g0130000(OsMTP9),Os01g0143300(-),Os01g0143800(-),Os01g0164500(BIP115),Os01g0173900(OsABCC3),Os01g0183100(OsWD40-5),Os01g0191500(-),Os01g0200500(-),Os01g0205500(-),Os01g0232700(-),Os01g0248600(PSF2),Os01g0251100(-),Os01g0276000(-),Os01g0281400(-),Os01g…	Os01g0120300(-),Os01g0142300(SQD2.2),Os01g0172100(OsPPT3),Os01g0547600(NRT2.4),Os01g0696100(-),Os01g0711000(-),Os01g0938100(PSB28),Os01g0975900(OsTIP1),Os02g0110200(HPL3),Os02g0217800(-),Os02g0314300(OsCAX1c),Os02g0474700(-),Os02g0666700(-),Os02g0704000(OsNCED1),Os03g0118200(-),Os03g0229500(-),Os03g0645900(OsNCED1),Os03g0844900(-),Os04g0600800(COLD1),Os05g0105900(-),Os05g0223200(-),Os05g0334400(O…
GO:0005575	Cellular Component	GO:0032991	macromolecular complex	417	15	MSTRG.17235(GYRA),MSTRG.26101(snrpb),MSTRG.27733(--),MSTRG.7572(BAK1),Os01g0100700(RPS5),Os01g0120800(eIF-3a),Os01g0183100(OsWD40-5),Os01g0191100(-),Os01g0191500(-),Os01g0200500(-),Os01g0205500(-),Os01g0231700(-),Os01g0248600(PSF2),Os01g0251100(-),Os01g0266000(-),Os01g0276000(-),Os01g0281400(-),Os01g0304000(-),Os01g0322800(OsWD40-13),Os01g0328400(RPS27a),Os01g0348700(OsRPL23A),Os01g0358400(RPS4),…	Os01g0711000(-),Os01g0938100(PSB28),Os02g0743400(PIN1A),Os03g0229500(-),Os04g0195000(OsWD40-99),Os05g0105900(-),Os05g0223200(-),Os07g0210000(OsEXO70FX10),Os08g0200300(OsPsbR3),Os08g0389700(-),Os10g0575800(-),Os11g0602600(-),Os11g0638900(-),gene-psaB(-),gene-psbD(-)
GO:0005575	Cellular Component	GO:0044464	cell part	1233	165	MSTRG.12170(--),MSTRG.1302(--),MSTRG.14792(SIT2),MSTRG.15447(--),MSTRG.17235(GYRA),MSTRG.18064(rpoC2),MSTRG.19806(MORF2),MSTRG.21456(rpoA),MSTRG.21477(ACC2),MSTRG.24228(--),MSTRG.24639(TY3B-I),MSTRG.25008(NRPA1),MSTRG.26101(snrpb),MSTRG.26284(TY3B-I),MSTRG.26888(GIP),MSTRG.27765(RE2),MSTRG.28921(--),MSTRG.29046(--),MSTRG.29379(RE1),MSTRG.31183(--),MSTRG.5912(GSTU6),MSTRG.7572(BAK1),MSTRG.7689(TY3…	MSTRG.10062(--),MSTRG.16779(--),MSTRG.16908(TIC214),MSTRG.20485(TY3B-I),MSTRG.23500(--),MSTRG.24064(--),MSTRG.24927(rbcL),MSTRG.25074(--),MSTRG.28560(--),MSTRG.32073(--),MSTRG.4776(KCS1),MSTRG.653(BHLH41),Os01g0120300(-),Os01g0142300(SQD2.2),Os01g0172100(OsPPT3),Os01g0175700(BOR2),Os01g0179600(OsUGT75K1),Os01g0207400(-),Os01g0213800(OsPCF5),Os01g0236300(OsARF16),Os01g0236700(-),Os01g0305900(-),Os…
GO:0005575	Cellular Component	GO:0005623	cell	1239	166	MSTRG.12170(--),MSTRG.1302(--),MSTRG.14792(SIT2),MSTRG.15447(--),MSTRG.17235(GYRA),MSTRG.18064(rpoC2),MSTRG.19806(MORF2),MSTRG.21456(rpoA),MSTRG.21477(ACC2),MSTRG.24228(--),MSTRG.24639(TY3B-I),MSTRG.25008(NRPA1),MSTRG.26101(snrpb),MSTRG.26284(TY3B-I),MSTRG.26888(GIP),MSTRG.27765(RE2),MSTRG.28921(--),MSTRG.29046(--),MSTRG.29379(RE1),MSTRG.31183(--),MSTRG.5912(GSTU6),MSTRG.7572(BAK1),MSTRG.7689(TY3…	MSTRG.10062(--),MSTRG.16779(--),MSTRG.16908(TIC214),MSTRG.20485(TY3B-I),MSTRG.23500(--),MSTRG.24064(--),MSTRG.24927(rbcL),MSTRG.25074(--),MSTRG.28560(--),MSTRG.32073(--),MSTRG.4776(KCS1),MSTRG.653(BHLH41),Os01g0120300(-),Os01g0142300(SQD2.2),Os01g0172100(OsPPT3),Os01g0175700(BOR2),Os01g0179600(OsUGT75K1),Os01g0207400(-),Os01g0213800(OsPCF5),Os01g0236300(OsARF16),Os01g0236700(-),Os01g0305900(-),Os…
GO:0005575	Cellular Component	GO:0031974	membrane-enclosed lumen	145	4	MSTRG.26101(snrpb),Os01g0143300(-),Os01g0143800(-),Os01g0164500(BIP115),Os01g0183100(OsWD40-5),Os01g0191500(-),Os01g0248600(PSF2),Os01g0251100(-),Os01g0375000(Os_F0781),Os01g0511200(-),Os01g0513800(-),Os01g0642900(SSB),Os01g0679000(-),Os01g0739000(-),Os01g0771100(-),Os01g0788950(-),Os01g0837500(OsRuvBL1a),Os01g0909500(-),Os01g0958900(OsMLH1),Os02g0102400(-),Os02g0103900(-),Os02g0115900(OsBiP1),Os…	Os02g0217800(-),Os05g0105900(-),Os05g0223200(-),Os10g0575800(-)
GO:0005575	Cellular Component	GO:0043226	organelle	879	104	MSTRG.12170(--),MSTRG.14792(SIT2),MSTRG.15447(--),MSTRG.17235(GYRA),MSTRG.18064(rpoC2),MSTRG.19806(MORF2),MSTRG.21456(rpoA),MSTRG.24228(--),MSTRG.24639(TY3B-I),MSTRG.25008(NRPA1),MSTRG.26101(snrpb),MSTRG.26284(TY3B-I),MSTRG.26888(GIP),MSTRG.27765(RE2),MSTRG.28921(--),MSTRG.29046(--),MSTRG.29379(RE1),MSTRG.31183(--),MSTRG.7572(BAK1),MSTRG.7689(TY3B-G),MSTRG.7987(XA21),MSTRG.9165(DMP6),Os01g0100700…	MSTRG.10062(--),MSTRG.16779(--),MSTRG.16908(TIC214),MSTRG.20485(TY3B-I),MSTRG.23500(--),MSTRG.24064(--),MSTRG.24927(rbcL),MSTRG.25074(--),MSTRG.28560(--),MSTRG.32073(--),MSTRG.4776(KCS1),MSTRG.653(BHLH41),Os01g0120300(-),Os01g0142300(SQD2.2),Os01g0172100(OsPPT3),Os01g0175700(BOR2),Os01g0179600(OsUGT75K1),Os01g0207400(-),Os01g0213800(OsPCF5),Os01g0236300(OsARF16),Os01g0236700(-),Os01g0305900(-),Os…
GO:0005575	Cellular Component	GO:0055044	symplast	36	4	Os01g0128400(-),Os01g0235400(-),Os01g0326100(RP-2),Os01g0327400(prx16),Os01g0358100(OsRALF-6),Os01g0375000(Os_F0781),Os01g0617500(-),Os01g0911200(-),Os01g0962700(prx20),Os01g0963000(prx22),Os02g0714600(-),Os03g0586800(-),Os03g0718100(ACT1),Os03g0804800(-),Os03g0853200(OsTET6),Os04g0685400(-),Os04g0688100(prx59),Os04g0688200(prx60),Os04g0688300(prx61),Os04g0688500(prx62),Os05g0154500(-),Os05g03187…	Os01g0952100(OsGLP1-5),Os02g0629200(OsPIP2),Os05g0317900(OsCrRLK1L2),Os06g0143700(OsSultr3)
GO:0005575	Cellular Component	GO:0030054	cell junction	37	4	MSTRG.25008(NRPA1),Os01g0128400(-),Os01g0235400(-),Os01g0326100(RP-2),Os01g0327400(prx16),Os01g0358100(OsRALF-6),Os01g0375000(Os_F0781),Os01g0617500(-),Os01g0911200(-),Os01g0962700(prx20),Os01g0963000(prx22),Os02g0714600(-),Os03g0586800(-),Os03g0718100(ACT1),Os03g0804800(-),Os03g0853200(OsTET6),Os04g0685400(-),Os04g0688100(prx59),Os04g0688200(prx60),Os04g0688300(prx61),Os04g0688500(prx62),Os05g01…	Os01g0952100(OsGLP1-5),Os02g0629200(OsPIP2),Os05g0317900(OsCrRLK1L2),Os06g0143700(OsSultr3)
GO:0005575	Cellular Component	GO:0019012	virion	1	0	MSTRG.26101(snrpb)	--
GO:0005575	Cellular Component	GO:0044423	virion part	1	0	MSTRG.26101(snrpb)	--
GO:0005575	Cellular Component	GO:0005576	extracellular region	68	11	Os01g0124200(RBBI3-1),Os01g0197700(Gn1a),Os01g0327400(prx16),Os01g0339900(PDIL2),Os01g0382000(OsPR1b),Os01g0382400(OsPR1#012),Os01g0660200(C10728),Os01g0687400(-),Os01g0696800(-),Os01g0788400(OsPME6),Os01g0794800(-),Os01g0795400(Hwi2),Os01g0850550(OsLAC7),Os01g0892500(-),Os01g0962700(prx20),Os01g0963000(prx22),Os02g0240100(prx30),Os02g0240300(prx29),Os02g0532500(OsGLP2-1),Os02g0534400(OSCIN1),Os0…	Os01g0842500(OsLAC5),Os01g0952100(OsGLP1-5),Os03g0232400(-),Os03g0273200(Lac),Os06g0149100(OsGELP75),Os08g0108100(-),Os08g0434100(OsRNS3),Os09g0452800(-),Os09g0537700(RNS4),Os10g0492900(-),Os11g0214900(-)
GO:0005575	Cellular Component	GO:0009295	nucleoid	4	0	Os01g0642900(SSB),Os01g0829000(-),Os03g0633900(-),Os03g0824100(OspTAC2)	--
GO:0005575	Cellular Component	GO:0099512	supramolecular fiber	9	0	Os03g0105600(OsTUB2),Os03g0726100(OsTubA3),Os04g0442800(-),Os04g0665400(FtsZ1),Os05g0154500(-),Os05g0156600(-),Os06g0671900(OsTUB3),Os11g0247300(TID1),Os12g0624800(-)	--
GO:0005575	Cellular Component	GO:0044421	extracellular region part	8	0	Os01g0197700(Gn1a),Os01g0382000(OsPR1b),Os01g0382400(OsPR1#012),Os01g0794800(-),Os01g0795400(Hwi2),Os03g0610650(OsSRP-LRS),Os07g0127700(PR1b),Os09g0442300(-)	--
GO:0005575	Cellular Component	GO:0016020	membrane	613	130	MSTRG.21477(ACC2),MSTRG.2635(ABCB11),MSTRG.31256(At5g57480),MSTRG.7572(BAK1),MSTRG.9165(DMP6),Os01g0103600(-),Os01g0113300(OsRLCK3),Os01g0118400(-),Os01g0120800(eIF-3a),Os01g0128400(-),Os01g0130000(OsMTP9),Os01g0131600(OsAP2),Os01g0136700(-),Os01g0138400(-),Os01g0152000(-),Os01g0155200(-),Os01g0173900(OsABCC3),Os01g0191500(-),Os01g0192550(-),Os01g0200500(-),Os01g0201100(-),Os01g0209800(OsCAT1),Os…	MSTRG.4776(KCS1),Os01g0172100(OsPPT3),Os01g0175700(BOR2),Os01g0227800(-),Os01g0229600(-),Os01g0547600(NRT2.4),Os01g0585100(-),Os01g0606000(OsSWEET6a),Os01g0695700(OsABCB4),Os01g0696100(-),Os01g0711000(-),Os01g0825500(-),Os01g0842500(OsLAC5),Os01g0846300(OsPP15),Os01g0878400(OsAAP10C),Os01g0881300(OsSWEET1a),Os01g0884900(-),Os01g0908600(OsProT1),Os01g0938100(PSB28),Os01g0975900(OsTIP1),Os02g010610…
GO:0005575	Cellular Component	GO:0044425	membrane part	497	108	Os01g0103600(-),Os01g0113300(OsRLCK3),Os01g0118400(-),Os01g0120800(eIF-3a),Os01g0130000(OsMTP9),Os01g0131600(OsAP2),Os01g0136700(-),Os01g0138400(-),Os01g0152000(-),Os01g0155200(-),Os01g0173900(OsABCC3),Os01g0192550(-),Os01g0201100(-),Os01g0209800(OsCAT1),Os01g0227700(-),Os01g0239700(-),Os01g0254200(-),Os01g0272600(OsRDN),Os01g0281400(-),Os01g0297200(-),Os01g0337500(-),Os01g0342750(-),Os01g0347200…	Os01g0172100(OsPPT3),Os01g0175700(BOR2),Os01g0227800(-),Os01g0229600(-),Os01g0547600(NRT2.4),Os01g0585100(-),Os01g0606000(OsSWEET6a),Os01g0695700(OsABCB4),Os01g0696100(-),Os01g0711000(-),Os01g0825500(-),Os01g0846300(OsPP15),Os01g0878400(OsAAP10C),Os01g0881300(OsSWEET1a),Os01g0884900(-),Os01g0908600(OsProT1),Os01g0938100(PSB28),Os01g0975900(OsTIP1),Os02g0106100(OSINV3),Os02g0117500(OsGLR3.1),Os02g…

## Sheet:  ZJ22b-vs-zj-esb
All enrichment GO terms of mRNAs of the comparison between ZJ22b and zj-esb.
GO ID (level1)	GO Term (level1)	GO ID (level2)	GO Term (level2)	number_of_ZJ22b-vs-Pir1b (up)	number_of_ZJ22b-vs-Pir1b (down)	Genes_of_ZJ22b-vs-Pir1b_up	Genes_of_ZJ22b-vs-Pir1b_down
GO:0008150	Biological Process	GO:0051704	multi-organism process	152	13	MSTRG.25968(JUB1),MSTRG.4664(PUB21),MSTRG.7572(BAK1),Os01g0134700(-),Os01g0194300(NH1),Os01g0224000(-),Os01g0253300(rImpa1a),Os01g0279700(OsPT21),Os01g0327600(-),Os01g0501700(OsTATC),Os01g0508500(RH2),Os01g0510100(OsMKK6),Os01g0642700(-),Os01g0668901(-),Os01g0670100(-),Os01g0686800(RACK1),Os01g0853400(OsCOI1a),Os01g0871000(-),Os01g0884300(OsNAC6),Os01g0885700(-),Os01g0895100(-),Os01g0923700(HK3),…	Os01g0669100(OsLSK1),Os01g0750300(OsCesA4),Os01g0784700(-),Os01g0849000(OsLTPd5),Os04g0401000(PI21),Os04g0632901(-),Os04g0633200(-),Os05g0160300(OsLTPd8),Os07g0694300(prx116),Os09g0525700(-),Os10g0555600(OsEXPB6),Os10g0555900(OsEXPB3),Os10g0556100(OsEXPB4)
GO:0008150	Biological Process	GO:0044699	single-organism process	1834	211	MSTRG.10517(NAC021),MSTRG.11068(CALS8),MSTRG.13824(--),MSTRG.15490(SCAB1),MSTRG.17235(GYRA),MSTRG.19806(MORF2),MSTRG.25968(JUB1),MSTRG.2635(ABCB11),MSTRG.26472(SORBIDRAFT_0019s002010),MSTRG.2736(XI-K),MSTRG.28425(--),MSTRG.30599(RPL5),MSTRG.31000(TPS9),MSTRG.31256(At5g57480),MSTRG.31615(CCR1),MSTRG.32225(RPL5),MSTRG.32226(NAD9),MSTRG.3364(CYP94B1),MSTRG.4652(MIK2),MSTRG.5895(ecdK),MSTRG.6412(DTX4…
169600(-),Os12g0170600(-),Os12g0175500(OsGRX27),Os12g0175700(-),Os12g0179800(Sir2),Os12g0181500(OsAAP11A),Os12g0183300(RHL),Os12g0199800(CYP76M13),Os12g0204500(-),Os12g0209200(OsBBX30),Os12g0210300(OsGSTZ2),Os12g0226700(-),Os12g0235800(-),Os12g0236400(ADK-A),Os12g0257600(OsLAC28),Os12g0258700(OsLAC29),Os12g0264500(-),Os12g0268000(sl),Os12g0277500(OsCPn60alpha1),Os12g0290100(-),Os12g0290600(-),Os1…	MSTRG.1319(OCT2),MSTRG.19036(psbD),MSTRG.27954(--),MSTRG.5087(ndhF),MSTRG.7378(DTC),MSTRG.9497(ndhF),Os01g0110100(Pho1),Os01g0126200(OsLPR2),Os01g0171000(OsSERL5),Os01g0178400(-),Os01g0178500(OsIAA1),Os01g0192000(DOS),Os01g0238500(-),Os01g0274100(OsYUCCA10),Os01g0282800(OsTUB1),Os01g0311500(OsPHS1a),Os01g0388101(-),Os01g0547600(NRT2.4),Os01g0627400(OsCYP72A17),Os01g0631200(-),Os01g0639900(BETACA1…
GO:0008150	Biological Process	GO:0051179	localization	583	64	MSTRG.13824(--),MSTRG.19806(MORF2),MSTRG.25008(NRPA1),MSTRG.2635(ABCB11),MSTRG.2736(XI-K),MSTRG.32226(NAD9),MSTRG.7056(Os05g0567100),MSTRG.7572(BAK1),MSTRG.9376(--),MSTRG.9475(atpH),Os01g0130000(OsMTP9),Os01g0133400(OsPGLCT),Os01g0173900(OsABCC3),Os01g0191500(-),Os01g0198200(-),Os01g0200500(-),Os01g0209800(OsCAT1),Os01g0231500(-),Os01g0235400(-),Os01g0239200(OsTPT1),Os01g0242600(OsNTMC2T6.1),Os01…	MSTRG.5087(ndhF),MSTRG.7378(DTC),MSTRG.9497(ndhF),Os01g0110100(Pho1),Os01g0547600(NRT2.4),Os01g0803300(-),Os01g0817000(-),Os01g0842500(OsLAC5),Os01g0881300(OsSWEET1a),Os01g0882800(OsAAP11E),Os01g0902100(OsABCC2),Os01g0902700(-),Os01g0905200(OsEXO70FX15),Os01g0952100(OsGLP1-5),Os02g0102200(OsAAP7C),Os02g0211000(OsABCA1),Os02g0318450(-),Os02g0474700(-),Os02g0689900(OsNRT1.5A),Os02g0730600(OsSTA74),…
GO:0008150	Biological Process	GO:0002376	immune system process	38	2	MSTRG.25968(JUB1),MSTRG.6848(--),MSTRG.7572(BAK1),Os01g0134700(-),Os01g0194300(NH1),Os01g0327600(-),Os01g0390900(OsDsPTP1),Os01g0508500(RH2),Os01g0575500(OsWD40-16),Os01g0958700(-),Os02g0234300(OsPUB4),Os02g0312800(OsSNI1),Os02g0327000(OsGAP1),Os02g0629400(-),Os03g0108600(OsRH50),Os03g0172000(MOS3/SAR3),Os03g0195100(OsALD1),Os03g0270000(-),Os03g0299900(OsAGD2),Os03g0438100(AOC),Os03g0643300(OsOAT…	Os01g0849000(OsLTPd5),Os05g0160300(OsLTPd8)
GO:0008150	Biological Process	GO:0050896	response to stimulus	646	80	MSTRG.10517(NAC021),MSTRG.11273(CLPB1),MSTRG.24228(--),MSTRG.2468(RLT2),MSTRG.25968(JUB1),MSTRG.31000(TPS9),MSTRG.31256(At5g57480),MSTRG.4652(MIK2),MSTRG.4664(PUB21),MSTRG.6848(--),MSTRG.7056(Os05g0567100),MSTRG.7572(BAK1),MSTRG.7894(PDC1),Os01g0107900(-),Os01g0118000(-),Os01g0134700(-),Os01g0174300(-),Os01g0182600(GI),Os01g0187900(-),Os01g0194300(NH1),Os01g0197900(OsRDR3),Os01g0218032(ROS1A),Os0…	MSTRG.27954(--),MSTRG.5074(--),MSTRG.7378(DTC),Os01g0110100(Pho1),Os01g0171000(OsSERL5),Os01g0178400(-),Os01g0178500(OsIAA1),Os01g0192000(DOS),Os01g0311500(OsPHS1a),Os01g0547600(NRT2.4),Os01g0625300(HSFC1A),Os01g0639900(BETACA1),Os01g0743800(OsPHP1),Os01g0750300(OsCesA4),Os01g0835500(rbohE),Os01g0849000(OsLTPd5),Os02g0110200(HPL3),Os02g0129800(-),Os02g0240100(prx30),Os02g0240300(prx29),Os02g05713…
GO:0008150	Biological Process	GO:0098754	detoxification	38	13	Os01g0327000(prx14),Os01g0327100(prx15),Os01g0675100(OsPrxII),Os01g0962700(prx20),Os01g0963000(prx22),Os02g0115700(CATA1),Os02g0192700(Pre),Os02g0537700(OsPRX2),Os02g0635000(OsNIT1),Os02g0646400(OsGRX10),Os02g0813500(OsGR2),Os03g0163300(OsGR1),Os03g0285700(OsAPX1),Os03g0358100(OsGpx2),Os03g0762300(-),Os03g0762400(prx51),Os04g0206600(UDP-GT),Os04g0434800(OsAPx7),Os04g0573200(SOD),Os04g0688500(prx6…	Os01g0835500(rbohE),Os02g0129800(-),Os02g0240100(prx30),Os02g0240300(prx29),Os03g0284600(-),Os04g0689000(prx64),Os06g0306300(prx78),Os06g0547400(prx86),Os07g0676900(prx109),Os07g0677100(POX8.1),Os07g0677400(POX5.1),Os07g0694300(prx116),Os09g0471100(prx122)
GO:0008150	Biological Process	GO:0048511	rhythmic process	8	0	Os01g0182600(GI),Os01g0971800(OsPCL1),Os02g0115700(CATA1),Os02g0150800(OsZTL1),Os03g0438100(AOC),Os06g0727200(CATB),Os09g0532400(OsPRR95),Os11g0547000(FKF1)	--
GO:0008150	Biological Process	GO:0040007	growth	32	2	Os01g0575500(OsWD40-16),Os01g0683100(OsKTN60),Os01g0884300(OsNAC6),Os01g0888800(-),Os01g0923700(HK3),Os02g0204700(OsCYP734A2),Os02g0596900(-),Os02g0622100(HBD2),Os03g0144800(-),Os03g0183100(BP-73),Os03g0438100(AOC),Os04g0436800(-),Os04g0457800(OsSERK2),Os04g0484900(OsHAG703),Os05g0586200(JAR1),Os05g0593100(-),Os06g0199500(OsHAL3),Os06g0600400(OsCYP734A4),Os06g0716700(GRP94),Os07g0209000(OsDGL1),O…	Os03g0227700(OsDWF4),Os07g0109400(-)
GO:0008150	Biological Process	GO:0040011	locomotion	4	1	Os02g0742200(OsRac3),Os03g0285800(OsMSRMK2),Os08g0544500(LPL3),Os10g0370500(-)	Os05g0244500(-)
GO:0008150	Biological Process	GO:0009987	cellular process	2501	259	MSTRG.10517(NAC021),MSTRG.11068(CALS8),MSTRG.11084(--),MSTRG.11273(CLPB1),MSTRG.12170(--),MSTRG.14792(SIT2),MSTRG.15490(SCAB1),MSTRG.17235(GYRA),MSTRG.18400(RE2),MSTRG.19587(Rv2228c),MSTRG.19806(MORF2),MSTRG.23349(TY3B-G),MSTRG.24100(Rv2228c),MSTRG.24228(--),MSTRG.24639(TY3B-I),MSTRG.2468(RLT2),MSTRG.25008(NRPA1),MSTRG.25943(SIT2),MSTRG.25944(SIT2),MSTRG.25968(JUB1),MSTRG.25977(SD25),MSTRG.26284(…
,Os07g0523500(-),Os07g0523600(OsGPT2),Os07g0523700(-),Os07g0523965(-),Os07g0529000(OsEnS-107),Os07g0529600(OsDR8),Os07g0529800(GOS2),Os07g0531600(-),Os07g0534700(-),Os07g0537900(-),Os07g0538400(OsRLCK235),Os07g0539700(-),Os07g0540100(-),Os07g0541000(-),Os07g0541200(-),Os07g0541400(-),Os07g0541500(-),Os07g0549800(-),Os07g0550500(-),Os07g0550900(-),Os07g0553633(-),Os07g0557400(-),Os07g0561800(-),Os…	MSTRG.1102(RE1),MSTRG.11417(--),MSTRG.1271(--),MSTRG.1319(OCT2),MSTRG.17868(--),MSTRG.18085(--),MSTRG.19036(psbD),MSTRG.2032(--),MSTRG.20485(TY3B-I),MSTRG.23500(--),MSTRG.25074(--),MSTRG.25474(--),MSTRG.27954(--),MSTRG.29047(--),MSTRG.5074(--),MSTRG.5087(ndhF),MSTRG.545(B'KAPPA),MSTRG.6869(TY3B-I),MSTRG.7378(DTC),MSTRG.8198(At3g47570),MSTRG.8886(TY3B-G),MSTRG.9497(ndhF),Os01g0110100(Pho1),Os01g01…
GO:0008150	Biological Process	GO:0022414	reproductive process	124	13	MSTRG.10517(NAC021),MSTRG.2468(RLT2),MSTRG.2736(XI-K),MSTRG.7572(BAK1),Os01g0169500(-),Os01g0182600(GI),Os01g0224000(-),Os01g0375000(Os_F0781),Os01g0501700(OsTATC),Os01g0510100(OsMKK6),Os01g0550000(AIP2),Os01g0566100(OsELF3.2),Os01g0617500(-),Os01g0642700(-),Os01g0668901(-),Os01g0670100(-),Os01g0733600(-),Os01g0753000(EIP8),Os01g0812000(GAMYB),Os01g0871000(-),Os01g0871300(-),Os01g0885700(-),Os01g…	Os01g0669100(OsLSK1),Os01g0784700(-),Os03g0727600(ACS1),Os04g0632901(-),Os04g0633200(-),Os07g0192900(-),Os07g0605200(MADS18),Os07g0616200(-),Os09g0451400(ACO2),Os09g0525700(-),Os10g0555600(OsEXPB6),Os10g0555900(OsEXPB3),Os10g0556100(OsEXPB4)
GO:0008150	Biological Process	GO:0000003	reproduction	124	13	MSTRG.10517(NAC021),MSTRG.2468(RLT2),MSTRG.2736(XI-K),MSTRG.7572(BAK1),Os01g0169500(-),Os01g0182600(GI),Os01g0224000(-),Os01g0375000(Os_F0781),Os01g0501700(OsTATC),Os01g0510100(OsMKK6),Os01g0550000(AIP2),Os01g0566100(OsELF3.2),Os01g0617500(-),Os01g0642700(-),Os01g0668901(-),Os01g0670100(-),Os01g0733600(-),Os01g0753000(EIP8),Os01g0812000(GAMYB),Os01g0871000(-),Os01g0871300(-),Os01g0885700(-),Os01g…	Os01g0669100(OsLSK1),Os01g0784700(-),Os03g0727600(ACS1),Os04g0632901(-),Os04g0633200(-),Os07g0192900(-),Os07g0605200(MADS18),Os07g0616200(-),Os09g0451400(ACO2),Os09g0525700(-),Os10g0555600(OsEXPB6),Os10g0555900(OsEXPB3),Os10g0556100(OsEXPB4)
GO:0008150	Biological Process	GO:0008152	metabolic process	2310	262	MSTRG.10517(NAC021),MSTRG.11068(CALS8),MSTRG.11084(--),MSTRG.11273(CLPB1),MSTRG.12170(--),MSTRG.14792(SIT2),MSTRG.17235(GYRA),MSTRG.18374(--),MSTRG.19587(Rv2228c),MSTRG.19806(MORF2),MSTRG.23349(TY3B-G),MSTRG.24100(Rv2228c),MSTRG.24228(--),MSTRG.24639(TY3B-I),MSTRG.2468(RLT2),MSTRG.25008(NRPA1),MSTRG.25943(SIT2),MSTRG.25944(SIT2),MSTRG.25968(JUB1),MSTRG.25977(SD25),MSTRG.26284(TY3B-I),MSTRG.26472(…
Os08g0301500(OsSPS8),Os08g0308100(OsWD40-159),Os08g0319900(OsCYL3),Os08g0320400(-),Os08g0323600(-),Os08g0326600(-),Os08g0327400(-),Os08g0331900(-),Os08g0334900(-),Os08g0335500(-),Os08g0338200(-),Os08g0338700(-),Os08g0342300(BRL3),Os08g0342400(-),Os08g0343000(OsRLCK251),Os08g0344100(HDA705),Os08g0345700(OsPFPA3),Os08g0345800(OsAGPS2a),Os08g0357300(OsbZIP65),Os08g0359100(-),Os08g0359200(-),Os08g035…	MSTRG.1102(RE1),MSTRG.11417(--),MSTRG.1271(--),MSTRG.17868(--),MSTRG.18085(--),MSTRG.19036(psbD),MSTRG.2032(--),MSTRG.20485(TY3B-I),MSTRG.23500(--),MSTRG.25074(--),MSTRG.25474(--),MSTRG.27954(--),MSTRG.29047(--),MSTRG.5074(--),MSTRG.5087(ndhF),MSTRG.545(B'KAPPA),MSTRG.6869(TY3B-I),MSTRG.7378(DTC),MSTRG.8198(At3g47570),MSTRG.8886(TY3B-G),MSTRG.9497(ndhF),Os01g0116800(-),Os01g0124000(RBBI2-1),Os01g…
GO:0008150	Biological Process	GO:0032501	multicellular organismal process	186	20	MSTRG.10517(NAC021),MSTRG.11068(CALS8),MSTRG.19806(MORF2),MSTRG.25968(JUB1),MSTRG.2736(XI-K),MSTRG.7572(BAK1),MSTRG.9376(--),Os01g0169500(-),Os01g0182600(GI),Os01g0197100(D2),Os01g0218032(ROS1A),Os01g0224000(-),Os01g0232700(-),Os01g0375000(Os_F0781),Os01g0510100(OsMKK6),Os01g0550000(AIP2),Os01g0566100(OsELF3.2),Os01g0575500(OsWD40-16),Os01g0617500(-),Os01g0642700(-),Os01g0653800(-),Os01g0666800(-…	Os01g0192000(DOS),Os01g0669100(OsLSK1),Os01g0784700(-),Os01g0952100(OsGLP1-5),Os02g0697400(4CL2),Os03g0227700(OsDWF4),Os03g0727600(ACS1),Os03g0785800(OsPCF6),Os04g0387300(-),Os04g0469800(D11),Os04g0632901(-),Os04g0633200(-),Os06g0601500(OsbZIP48),Os07g0192900(-),Os07g0605200(MADS18),Os07g0616200(-),Os08g0494100(MADS62),Os09g0451400(ACO2),Os09g0525700(-),Os10g0562700(REL2)
GO:0008150	Biological Process	GO:0023052	signaling	216	24	MSTRG.10517(NAC021),MSTRG.4652(MIK2),MSTRG.6848(--),MSTRG.7572(BAK1),Os01g0194300(NH1),Os01g0267900(OsCam1-3),Os01g0279300(OsCaM3),Os01g0286100(PIL15),Os01g0292200(OsCIPK01),Os01g0296100(-),Os01g0390900(OsDsPTP1),Os01g0510100(OsMKK6),Os01g0620100(OsWD40-19),Os01g0622600(OsCDPK1),Os01g0668901(-),Os01g0686800(RACK1),Os01g0689900(OsWAK10),Os01g0783200(-),Os01g0826400(OsWRKY24),Os01g0846900(-),Os01g0…	Os01g0171000(OsSERL5),Os01g0178400(-),Os01g0178500(OsIAA1),Os01g0192000(DOS),Os01g0743800(OsPHP1),Os02g0805100(OsIAA9),Os03g0226300(OsRLCK104),Os03g0227700(OsDWF4),Os03g0228800(-),Os03g0232600(ELF1),Os03g0292700(-),Os04g0310400(OsWAK36),Os04g0442000(OsARF9),Os04g0517500(-),Os05g0100700(OsRLCK175),Os05g0389000(ERF142),Os05g0398800(-),Os05g0498900(OsRLCK189),Os05g0589700(OsRLCK191),Os06g0601500(Osb…
GO:0008150	Biological Process	GO:0071840	cellular component organization or biogenesis	480	25	MSTRG.11068(CALS8),MSTRG.19806(MORF2),MSTRG.31256(At5g57480),MSTRG.7572(BAK1),MSTRG.9475(atpH),Os01g0100700(RPS5),Os01g0102600(OsSK4),Os01g0120800(eIF-3a),Os01g0125800(AIP1),Os01g0141100(OsSKD1),Os01g0143800(-),Os01g0153100(OsFbox002),Os01g0184000(-),Os01g0191500(-),Os01g0197900(OsRDR3),Os01g0200500(-),Os01g0263600(Du1L),Os01g0268300(-),Os01g0278900(RPL5),Os01g0296200(OsPGL13),Os01g0389200(-),Os0…	Os01g0282800(OsTUB1),Os01g0311500(OsPHS1a),Os01g0654300(-),Os01g0750300(OsCesA4),Os01g0763700(-),Os01g0823100(OsEXP2),Os02g0697400(4CL2),Os02g0782500(OsHSP18.0-CIII),Os03g0209500(-),Os03g0227700(OsDWF4),Os05g0244500(-),Os05g0354300(APC1),Os05g0413200(TUB6),Os05g0477600(OsEXP4),Os06g0601600(OsCesA11),Os07g0109400(-),Os07g0645200(-),Os07g0691200(-),Os08g0479300(CycD4),Os09g0525700(-),Os10g0507600(-…
GO:0008150	Biological Process	GO:0048518	positive regulation of biological process	140	11	Os01g0125800(AIP1),Os01g0134700(-),Os01g0143800(-),Os01g0165000(DREB2A),Os01g0169500(-),Os01g0194300(NH1),Os01g0263600(Du1L),Os01g0510100(OsMKK6),Os01g0620100(OsWD40-19),Os01g0626900(-),Os01g0668300(-),Os01g0686800(RACK1),Os01g0746200(NUP85),Os01g0753000(EIP8),Os01g0826400(OsWRKY24),Os01g0884300(OsNAC6),Os01g0888800(-),Os01g0920200(-),Os01g0923600(CAMTA),Os01g0934000(OsATG18c),Os01g0942900(-),Os0…	Os01g0625300(HSFC1A),Os01g0654300(-),Os02g0132500(OsbZIP14),Os02g0671300(OsbHLH076),Os03g0292700(-),Os03g0797600(OsbHLH098),Os05g0390800(OsVQ19),Os05g0491700(OsVQ20),Os07g0605200(MADS18),Os08g0479300(CycD4),Os08g0494100(MADS62)
GO:0008150	Biological Process	GO:0032502	developmental process	178	19	MSTRG.10517(NAC021),MSTRG.11068(CALS8),MSTRG.19806(MORF2),MSTRG.2468(RLT2),MSTRG.25968(JUB1),MSTRG.2736(XI-K),MSTRG.7572(BAK1),MSTRG.9376(--),Os01g0169500(-),Os01g0182600(GI),Os01g0191900(R2R3-MYB),Os01g0197100(D2),Os01g0218032(ROS1A),Os01g0232700(-),Os01g0375000(Os_F0781),Os01g0510100(OsMKK6),Os01g0550000(AIP2),Os01g0566100(OsELF3.2),Os01g0575500(OsWD40-16),Os01g0617500(-),Os01g0653800(-),Os01g0…	Os01g0192000(DOS),Os01g0952100(OsGLP1-5),Os02g0695200(OsMYB58/63-L),Os02g0697400(4CL2),Os03g0227700(OsDWF4),Os03g0727600(ACS1),Os03g0785800(OsPCF6),Os04g0387300(-),Os04g0469800(D11),Os06g0601500(OsbZIP48),Os07g0109400(-),Os07g0192900(-),Os07g0605200(MADS18),Os07g0616200(-),Os08g0494100(MADS62),Os09g0451400(ACO2),Os09g0525700(-),Os10g0562700(REL2),Os12g0490000(-)
GO:0008150	Biological Process	GO:0048519	negative regulation of biological process	119	17	MSTRG.12170(--),MSTRG.19587(Rv2228c),MSTRG.23349(TY3B-G),MSTRG.24100(Rv2228c),MSTRG.24639(TY3B-I),MSTRG.25968(JUB1),MSTRG.26284(TY3B-I),MSTRG.27191(At2g04865),MSTRG.4986(Rv2228c),MSTRG.5806(--),MSTRG.7689(TY3B-G),MSTRG.7987(XA21),Os01g0124200(RBBI3-1),Os01g0169500(-),Os01g0194300(NH1),Os01g0197900(OsRDR3),Os01g0260700(-),Os01g0263600(Du1L),Os01g0267300(OsSRP-QKG),Os01g0270100(-),Os01g0275600(OsAG…	MSTRG.11417(--),MSTRG.1271(--),MSTRG.17868(--),MSTRG.18085(--),MSTRG.2032(--),MSTRG.20485(TY3B-I),MSTRG.23500(--),MSTRG.25074(--),MSTRG.25474(--),MSTRG.29047(--),MSTRG.6869(TY3B-I),MSTRG.8886(TY3B-G),Os01g0124000(RBBI2-1),Os01g0823500(OsOFP4),Os03g0210000(-),Os09g0459500(BIP119),Os10g0508700(-)
GO:0008150	Biological Process	GO:0065007	biological regulation	739	86	MSTRG.10517(NAC021),MSTRG.11273(CLPB1),MSTRG.12170(--),MSTRG.15490(SCAB1),MSTRG.17235(GYRA),MSTRG.19587(Rv2228c),MSTRG.19806(MORF2),MSTRG.23349(TY3B-G),MSTRG.24100(Rv2228c),MSTRG.24639(TY3B-I),MSTRG.2468(RLT2),MSTRG.25968(JUB1),MSTRG.26284(TY3B-I),MSTRG.27191(At2g04865),MSTRG.4652(MIK2),MSTRG.4986(Rv2228c),MSTRG.5806(--),MSTRG.6848(--),MSTRG.7572(BAK1),MSTRG.7689(TY3B-G),MSTRG.7987(XA21),Os01g012…	MSTRG.11417(--),MSTRG.1271(--),MSTRG.17868(--),MSTRG.18085(--),MSTRG.2032(--),MSTRG.20485(TY3B-I),MSTRG.23500(--),MSTRG.25074(--),MSTRG.25474(--),MSTRG.27954(--),MSTRG.29047(--),MSTRG.545(B'KAPPA),MSTRG.6869(TY3B-I),MSTRG.8886(TY3B-G),Os01g0124000(RBBI2-1),Os01g0171000(OsSERL5),Os01g0178400(-),Os01g0178500(OsIAA1),Os01g0192000(DOS),Os01g0388101(-),Os01g0566800(OsbHLH117),Os01g0625300(HSFC1A),Os01…
GO:0008150	Biological Process	GO:0050789	regulation of biological process	664	79	MSTRG.10517(NAC021),MSTRG.11273(CLPB1),MSTRG.12170(--),MSTRG.15490(SCAB1),MSTRG.17235(GYRA),MSTRG.19587(Rv2228c),MSTRG.19806(MORF2),MSTRG.23349(TY3B-G),MSTRG.24100(Rv2228c),MSTRG.24639(TY3B-I),MSTRG.2468(RLT2),MSTRG.25968(JUB1),MSTRG.26284(TY3B-I),MSTRG.27191(At2g04865),MSTRG.4652(MIK2),MSTRG.4986(Rv2228c),MSTRG.5806(--),MSTRG.6848(--),MSTRG.7572(BAK1),MSTRG.7689(TY3B-G),MSTRG.7987(XA21),Os01g012…	MSTRG.11417(--),MSTRG.1271(--),MSTRG.17868(--),MSTRG.18085(--),MSTRG.2032(--),MSTRG.20485(TY3B-I),MSTRG.23500(--),MSTRG.25074(--),MSTRG.25474(--),MSTRG.27954(--),MSTRG.29047(--),MSTRG.545(B'KAPPA),MSTRG.6869(TY3B-I),MSTRG.8886(TY3B-G),Os01g0124000(RBBI2-1),Os01g0171000(OsSERL5),Os01g0178400(-),Os01g0178500(OsIAA1),Os01g0192000(DOS),Os01g0566800(OsbHLH117),Os01g0625300(HSFC1A),Os01g0639900(BETACA1…
GO:0003674	Molecular Function	GO:0003824	catalytic activity	2001	244	MSTRG.11068(CALS8),MSTRG.11084(--),MSTRG.11273(CLPB1),MSTRG.14792(SIT2),MSTRG.17235(GYRA),MSTRG.17939(--),MSTRG.18365(TPS7),MSTRG.18374(--),MSTRG.18430(WAK2),MSTRG.19806(MORF2),MSTRG.25008(NRPA1),MSTRG.25943(SIT2),MSTRG.25944(SIT2),MSTRG.25977(SD25),MSTRG.2635(ABCB11),MSTRG.26472(SORBIDRAFT_0019s002010),MSTRG.26888(GIP),MSTRG.27191(At2g04865),MSTRG.27946(Os04g0179200),MSTRG.28425(--),MSTRG.30893(…
0439800(Oscyp71Z4),Os10g0439924(Oscyp71Z8),Os10g0441800(OsRab5A2),Os10g0441900(-),Os10g0442000(-),Os10g0442400(-),Os10g0442900(ABCG25),Os10g0447600(-),Os10g0456400(-),Os10g0457600(-),Os10g0466300(OsWD40-178),Os10g0468500(-),Os10g0483500(OsCKX3),Os10g0488800(OSMYOVIIIB),Os10g0492200(-),Os10g0496900(FGL),Os10g0503500(-),Os10g0504200(-),Os10g0510400(-),Os10g0511400(OsProCP3),Os10g0511600(OsProCP4),O…	MSTRG.1102(RE1),MSTRG.18361(TPS7),MSTRG.19036(psbD),MSTRG.27954(--),MSTRG.5087(ndhF),MSTRG.8198(At3g47570),MSTRG.9497(ndhF),Os01g0116800(-),Os01g0126200(OsLPR2),Os01g0171000(OsSERL5),Os01g0191200(-),Os01g0192900(OsACS5),Os01g0229600(-),Os01g0238500(-),Os01g0274100(OsYUCCA10),Os01g0282800(OsTUB1),Os01g0311500(OsPHS1a),Os01g0329900(OsGELP14),Os01g0332800(OsSCP3),Os01g0362100(-),Os01g0388101(-),Os01…
GO:0003674	Molecular Function	GO:0005198	structural molecule activity	147	4	MSTRG.30599(RPL5),MSTRG.32225(RPL5),Os01g0100700(RPS5),Os01g0191100(-),Os01g0200500(-),Os01g0251100(-),Os01g0276000(-),Os01g0281400(-),Os01g0304000(-),Os01g0358400(RPS4),Os01g0511300(OsRpn9a),Os01g0620100(OsWD40-19),Os01g0678600(-),Os01g0746200(NUP85),Os01g0749200(WLP1),Os01g0752300(-),Os01g0815800(BIP123),Os01g0823300(OsRPS26),Os01g0860300(-),Os01g0924000(-),Os02g0102400(-),Os02g0103700(-),Os02g…	Os01g0282800(OsTUB1),Os01g0654300(-),Os05g0413200(TUB6),gene-rps18(-)
GO:0003674	Molecular Function	GO:0005215	transporter activity	301	46	MSTRG.2635(ABCB11),MSTRG.6412(DTX44),MSTRG.9475(atpH),Os01g0130000(OsMTP9),Os01g0133400(OsPGLCT),Os01g0173900(OsABCC3),Os01g0209800(OsCAT1),Os01g0239200(OsTPT1),Os01g0253300(rImpa1a),Os01g0279700(OsPT21),Os01g0297700(OsUMAMIT5),Os01g0337500(-),Os01g0342750(-),Os01g0363900(OsWAK5),Os01g0385400(OsSLAC7),Os01g0501700(OsTATC),Os01g0504500(-),Os01g0571000(-),Os01g0588200(OSVDAC3),Os01g0600000(-),Os01g…	MSTRG.1319(OCT2),MSTRG.7378(DTC),Os01g0110100(Pho1),Os01g0547600(NRT2.4),Os01g0803300(-),Os01g0817000(-),Os01g0881300(OsSWEET1a),Os01g0882800(OsAAP11E),Os01g0902100(OsABCC2),Os01g0902700(-),Os02g0102200(OsAAP7C),Os02g0211000(OsABCA1),Os02g0318450(-),Os02g0474700(-),Os02g0689900(OsNRT1.5A),Os03g0103000(OsNRT1.1C),Os03g0374900(OsLAT2),Os03g0607400(-),Os03g0641200(OsCAT3),Os03g0839200(-),Os04g020180…
GO:0003674	Molecular Function	GO:0016209	antioxidant activity	38	12	Os01g0327000(prx14),Os01g0327100(prx15),Os01g0675100(OsPrxII),Os01g0855200(-),Os01g0962700(prx20),Os01g0963000(prx22),Os02g0115700(CATA1),Os02g0192700(Pre),Os02g0537700(OsPRX2),Os02g0646400(OsGRX10),Os02g0753800(ANN2),Os02g0813500(OsGR2),Os03g0163300(OsGR1),Os03g0285700(OsAPX1),Os03g0358100(OsGpx2),Os03g0762300(-),Os03g0762400(prx51),Os04g0434800(OsAPx7),Os04g0573200(SOD),Os04g0688500(prx62),Os05…	Os01g0835500(rbohE),Os02g0240100(prx30),Os02g0240300(prx29),Os03g0284600(-),Os04g0689000(prx64),Os06g0306300(prx78),Os06g0547400(prx86),Os07g0676900(prx109),Os07g0677100(POX8.1),Os07g0677400(POX5.1),Os07g0694300(prx116),Os09g0471100(prx122)
GO:0003674	Molecular Function	GO:0016530	metallochaperone activity	2	0	Os04g0573200(SOD),Os08g0561700(OsSOD4)	--
GO:0003674	Molecular Function	GO:0004871	signal transducer activity	60	8	Os01g0510100(OsMKK6),Os01g0668901(-),Os01g0923700(HK3),Os01g0936100(OsRLCK55),Os02g0135200(OsMPK13),Os02g0148100(OsMAPK33),Os02g0156000(OsRLCK62),Os02g0554100(-),Os02g0629400(-),Os02g0640500(SIT1),Os02g0712700(-),Os03g0130900(OsRLCK96),Os03g0232900(-),Os03g0241600(OsRLCK105),Os03g0285800(OsMSRMK2),Os03g0701700(OS-ERS1),Os03g0717000(OsTMK),Os03g0719800(PHYA),Os03g0724300(-),Os03g0752100(PHYC),Os03…	Os01g0171000(OsSERL5),Os01g0743800(OsPHP1),Os03g0226300(OsRLCK104),Os05g0100700(OsRLCK175),Os05g0398800(-),Os05g0498900(OsRLCK189),Os05g0589700(OsRLCK191),Os10g0389800(-)
GO:0003674	Molecular Function	GO:0060089	molecular transducer activity	52	7	Os01g0668901(-),Os01g0923700(HK3),Os01g0936100(OsRLCK55),Os02g0156000(OsRLCK62),Os02g0554100(-),Os02g0629400(-),Os02g0640500(SIT1),Os02g0712700(-),Os03g0130900(OsRLCK96),Os03g0232900(-),Os03g0241600(OsRLCK105),Os03g0701700(OS-ERS1),Os03g0717000(OsTMK),Os03g0719800(PHYA),Os03g0724300(-),Os03g0752100(PHYC),Os03g0772600(-),Os03g0773300(-),Os04g0109100(OsRLCK125),Os04g0109400(-),Os04g0288500(-),Os04g…	Os01g0171000(OsSERL5),Os03g0226300(OsRLCK104),Os05g0100700(OsRLCK175),Os05g0398800(-),Os05g0498900(OsRLCK189),Os05g0589700(OsRLCK191),Os10g0389800(-)
GO:0003674	Molecular Function	GO:0031386	protein tag	3	0	Os02g0161900(rubq2),Os05g0160200(S27a),Os11g0145400(-)	--
GO:0003674	Molecular Function	GO:0045182	translation regulator activity	1	0	Os01g0143800(-)	--
GO:0003674	Molecular Function	GO:0009055	electron carrier activity	26	4	Os01g0174900(OsGRX1),Os01g0337900(-),Os01g0530400(OsGRX5),Os01g0885000(-),Os01g0935700(-),Os02g0646400(OsGRX10),Os02g0758800(OsUCL6),Os02g0813500(OsGR2),Os03g0163300(OsGR1),Os03g0429800(-),Os03g0659200(OsFdC1),Os03g0713400(-),Os03g0772800(-),Os03g0835400(-),Os03g0835900(OsFd3),Os04g0674400(-),Os05g0301700(-),Os05g0529700(OsDjC50),Os06g0224200(OsGRL12),Os06g0681200(OsENODL18),Os06g0718400(OsUCL18)…	MSTRG.19036(psbD),Os04g0473150(-),Os06g0101600(OsPC),Os08g0137400(OsUCL23)
GO:0003674	Molecular Function	GO:0045735	nutrient reservoir activity	8	2	Os03g0693700(OsOxO1),Os03g0693800(Osoxo4),Os03g0693900(OsOxO3),Os03g0694000(Osoxo4),Os03g0804500(GER7),Os04g0537900(GLUP3),Os05g0116000(-),Os08g0189600(GLP8-7)	Os01g0952100(OsGLP1-5),Os08g0459700(OsGLP8-13)
GO:0003674	Molecular Function	GO:0001071	nucleic acid binding transcription factor activity	117	19	MSTRG.10517(NAC021),MSTRG.2468(RLT2),Os01g0134700(-),Os01g0165000(DREB2A),Os01g0185900(OsWRKY107),Os01g0191900(R2R3-MYB),Os01g0195000(OsIDD2),Os01g0260700(-),Os01g0279900(OsbZIP03),Os01g0289600(OsWRKY9),Os01g0584900(OsWRKY77),Os01g0626400(WRKY11),Os01g0626900(-),Os01g0658900(OsBZ8),Os01g0693400(AP2/EREBP#127),Os01g0714800(OsWRKY26),Os01g0730700(OsWRKY14),Os01g0734000(OsWRKY23),Os01g0758200(OsDof6…	Os01g0625300(HSFC1A),Os01g0813100(HBF2),Os02g0132500(OsbZIP14),Os02g0655200(ERF95),Os02g0671300(OsbHLH076),Os02g0695200(OsMYB58/63-L),Os03g0161900(HSFA2D),Os03g0231950(OsbHLH088),Os03g0785800(OsPCF6),Os03g0797600(OsbHLH098),Os04g0387300(-),Os05g0389000(ERF142),Os06g0601500(OsbZIP48),Os07g0605200(MADS18),Os08g0442400(AP2/EREBP#109),Os08g0494100(MADS62),Os08g0499300(OsWRKY30),Os09g0522200(OsDREB1A)…
GO:0003674	Molecular Function	GO:0005488	binding	2234	222	MSTRG.11084(--),MSTRG.11273(CLPB1),MSTRG.11428(RE1),MSTRG.14792(SIT2),MSTRG.15580(AQR),MSTRG.17151(GIP),MSTRG.17235(GYRA),MSTRG.18365(TPS7),MSTRG.19806(MORF2),MSTRG.2468(RLT2),MSTRG.25008(NRPA1),MSTRG.25943(SIT2),MSTRG.25944(SIT2),MSTRG.25977(SD25),MSTRG.26472(SORBIDRAFT_0019s002010),MSTRG.2736(XI-K),MSTRG.29379(RE1),MSTRG.30483(--),MSTRG.30599(RPL5),MSTRG.30769(GIP),MSTRG.30893(At2g28960),MSTRG.…
),Os08g0543100(-),Os08g0544500(LPL3),Os08g0546800(HSFB2B),Os08g0548200(-),Os08g0549000(OsGL1A),Os08g0549100(OsAPx4),Os08g0554400(OsIDD6),Os08g0557100(-),Os08g0557600(OsMDAR4),Os08g0558100(-),Os08g0559600(Dad),Os08g0561700(OsSOD4),Os08g0562200(OsNTL5),Os08g0562300(-),Os08g0562700(-),Os08g0564300(OsABCB22),Os08g0565700(OsSET32),Os09g0103700(-),Os09g0110400(-),Os09g0115400(OsPABPC1),Os09g0123100(-),…	MSTRG.1102(RE1),MSTRG.18361(TPS7),MSTRG.19036(psbD),MSTRG.5087(ndhF),MSTRG.8198(At3g47570),MSTRG.9497(ndhF),Os01g0110100(Pho1),Os01g0116800(-),Os01g0126200(OsLPR2),Os01g0161000(-),Os01g0171000(OsSERL5),Os01g0178500(OsIAA1),Os01g0192000(DOS),Os01g0192900(OsACS5),Os01g0238500(-),Os01g0274100(OsYUCCA10),Os01g0282800(OsTUB1),Os01g0566800(OsbHLH117),Os01g0598600(-),Os01g0625300(HSFC1A),Os01g0627400(Os…
GO:0003674	Molecular Function	GO:0000988	transcription factor activity, protein binding	9	1	Os01g0920200(-),Os02g0189100(OsMED11_1),Os04g0271000(osSRT701),Os05g0588700(-),Os06g0688100(-),Os09g0375100(OsHSBP1),Os09g0512900(-),Os09g0573200(-),Os12g0290600(-)	Os07g0645200(-)
GO:0003674	Molecular Function	GO:0098772	molecular function regulator	49	7	Os01g0124200(RBBI3-1),Os01g0267300(OsSRP-QKG),Os01g0270100(-),Os01g0615050(-),Os01g0615100(OCPI2),Os01g0788400(OsPME6),Os01g0803200(Oc1*),Os02g0327000(OsGAP1),Os02g0600100(-),Os02g0761900(-),Os03g0246800(-),Os03g0259700(-),Os03g0406200(eEF-1beta2),Os03g0610650(OsSRP-LRS),Os03g0721200(-),Os03g0734300(-),Os03g0772800(-),Os03g0822700(-),Os03g0823400(-),Os03g0856400(OsCBSX8),Os04g0564700(-),Os04g0573…	MSTRG.545(B'KAPPA),Os01g0124000(RBBI2-1),Os01g0178400(-),Os03g0210000(-),Os08g0479300(CycD4),Os09g0459500(BIP119),Os10g0508700(-)
GO:0005575	Cellular Component	GO:0044422	organelle part	796	48	MSTRG.11273(CLPB1),MSTRG.13824(--),MSTRG.19806(MORF2),MSTRG.30599(RPL5),MSTRG.32225(RPL5),MSTRG.32226(NAD9),MSTRG.6412(DTX44),MSTRG.8112(--),MSTRG.9475(atpH),Os01g0100700(RPS5),Os01g0100900(SPL1),Os01g0102600(OsSK4),Os01g0103600(-),Os01g0118000(-),Os01g0125800(AIP1),Os01g0128400(-),Os01g0130000(OsMTP9),Os01g0133400(OsPGLCT),Os01g0143800(-),Os01g0153100(OsFbox002),Os01g0173900(OsABCC3),Os01g017490…	MSTRG.19036(psbD),MSTRG.27954(--),MSTRG.5087(ndhF),MSTRG.7378(DTC),MSTRG.9497(ndhF),Os01g0110100(Pho1),Os01g0126200(OsLPR2),Os01g0282800(OsTUB1),Os01g0292700(OsIF),Os01g0547600(NRT2.4),Os01g0589800(-),Os01g0654300(-),Os01g0750300(OsCesA4),Os01g0763700(-),Os01g0902100(OsABCC2),Os02g0110200(HPL3),Os02g0474700(-),Os02g0675700(-),Os02g0730600(OsSTA74),Os02g0815300(-),Os03g0222700(-),Os03g0280800(OsUX…
GO:0005575	Cellular Component	GO:0044464	cell part	2337	240	MSTRG.11068(CALS8),MSTRG.11273(CLPB1),MSTRG.11428(RE1),MSTRG.12170(--),MSTRG.13824(--),MSTRG.14792(SIT2),MSTRG.15580(AQR),MSTRG.17235(GYRA),MSTRG.19587(Rv2228c),MSTRG.19806(MORF2),MSTRG.23349(TY3B-G),MSTRG.24100(Rv2228c),MSTRG.24228(--),MSTRG.24639(TY3B-I),MSTRG.2468(RLT2),MSTRG.25008(NRPA1),MSTRG.25943(SIT2),MSTRG.25944(SIT2),MSTRG.26284(TY3B-I),MSTRG.26472(SORBIDRAFT_0019s002010),MSTRG.26888(GI…
-7),Os08g0191000(OsPILS2),Os08g0191700(GLYI-11),Os08g0199300(OsYchF1),Os08g0203100(-),Os08g0203600(-),Os08g0203700(-),Os08g0203900(-),Os08g0205900(-),Os08g0206900(SPL29),Os08g0224100(OsDPK1),Os08g0229601(-),Os08g0230800(OsLecRK),Os08g0244100(-),Os08g0246400(-),Os08g0254500(-),Os08g0269800(OsFbox432),Os08g0282400(-),Os08g0295300(-),Os08g0300300(OsCBSCLC6),Os08g0300700(-),Os08g0308100(OsWD40-159),O…	MSTRG.10948(--),MSTRG.1102(RE1),MSTRG.11417(--),MSTRG.1271(--),MSTRG.17868(--),MSTRG.18085(--),MSTRG.19036(psbD),MSTRG.2032(--),MSTRG.20485(TY3B-I),MSTRG.23498(--),MSTRG.23500(--),MSTRG.25074(--),MSTRG.25474(--),MSTRG.27954(--),MSTRG.29047(--),MSTRG.5074(--),MSTRG.5087(ndhF),MSTRG.545(B'KAPPA),MSTRG.6869(TY3B-I),MSTRG.7378(DTC),MSTRG.8198(At3g47570),MSTRG.8886(TY3B-G),MSTRG.918(--),MSTRG.9497(ndh…
GO:0005575	Cellular Component	GO:0005623	cell	2360	241	MSTRG.11068(CALS8),MSTRG.11273(CLPB1),MSTRG.11428(RE1),MSTRG.12170(--),MSTRG.13824(--),MSTRG.14792(SIT2),MSTRG.15580(AQR),MSTRG.17235(GYRA),MSTRG.19587(Rv2228c),MSTRG.19806(MORF2),MSTRG.23349(TY3B-G),MSTRG.24100(Rv2228c),MSTRG.24228(--),MSTRG.24639(TY3B-I),MSTRG.2468(RLT2),MSTRG.25008(NRPA1),MSTRG.25943(SIT2),MSTRG.25944(SIT2),MSTRG.26284(TY3B-I),MSTRG.26472(SORBIDRAFT_0019s002010),MSTRG.26888(GI…
Os08g0135400(OsRFPHC-2),Os08g0135900(TS),Os08g0137200(-),Os08g0137800(OsUCL24),Os08g0138500(OsPRI1),Os08g0139000(-),Os08g0139100(-),Os08g0141300(-),Os08g0148600(-),Os08g0156800(-),Os08g0157500(ROMT9),Os08g0157900(ONAC037),Os08g0159900(PRP5),Os08g0187800(OsGPT1),Os08g0189600(GLP8-7),Os08g0191000(OsPILS2),Os08g0191700(GLYI-11),Os08g0199300(OsYchF1),Os08g0203100(-),Os08g0203600(-),Os08g0203700(-),Os…	MSTRG.10948(--),MSTRG.1102(RE1),MSTRG.11417(--),MSTRG.1271(--),MSTRG.17868(--),MSTRG.18085(--),MSTRG.19036(psbD),MSTRG.2032(--),MSTRG.20485(TY3B-I),MSTRG.23498(--),MSTRG.23500(--),MSTRG.25074(--),MSTRG.25474(--),MSTRG.27954(--),MSTRG.29047(--),MSTRG.5074(--),MSTRG.5087(ndhF),MSTRG.545(B'KAPPA),MSTRG.6869(TY3B-I),MSTRG.7378(DTC),MSTRG.8198(At3g47570),MSTRG.8886(TY3B-G),MSTRG.918(--),MSTRG.9497(ndh…
GO:0005575	Cellular Component	GO:0032991	macromolecular complex	595	20	MSTRG.15580(AQR),MSTRG.17235(GYRA),MSTRG.27733(--),MSTRG.30599(RPL5),MSTRG.32225(RPL5),MSTRG.6098(--),MSTRG.7572(BAK1),MSTRG.8112(--),MSTRG.9475(atpH),Os01g0100700(RPS5),Os01g0120800(eIF-3a),Os01g0153100(OsFbox002),Os01g0191100(-),Os01g0191500(-),Os01g0197900(OsRDR3),Os01g0200500(-),Os01g0251100(-),Os01g0263600(Du1L),Os01g0267200(OsRpn11),Os01g0276000(-),Os01g0278900(RPL5),Os01g0281400(-),Os01g03…	MSTRG.19036(psbD),MSTRG.545(B'KAPPA),Os01g0178400(-),Os01g0654300(-),Os01g0659900(OsFBK1),Os01g0763700(-),Os01g0786700(-),Os01g0905200(OsEXO70FX15),Os03g0355200(OsWD40-72),Os03g0355400(-),Os04g0473150(-),Os05g0354300(APC1),Os05g0508900(-),Os07g0192900(-),Os07g0210000(OsEXO70FX10),Os07g0558400(CP29),Os07g0645200(-),Os08g0435900(cab),Os08g0479300(CycD4),gene-rps18(-)
GO:0005575	Cellular Component	GO:0016020	membrane	1432	194	MSTRG.11068(CALS8),MSTRG.13824(--),MSTRG.15580(AQR),MSTRG.2635(ABCB11),MSTRG.31256(At5g57480),MSTRG.32226(NAD9),MSTRG.6412(DTX44),MSTRG.7572(BAK1),MSTRG.9376(--),MSTRG.9475(atpH),Os01g0100900(SPL1),Os01g0103600(-),Os01g0107900(-),Os01g0116400(-),Os01g0116900(-),Os01g0118700(-),Os01g0120800(eIF-3a),Os01g0121200(-),Os01g0121300(-),Os01g0121500(-),Os01g0128400(-),Os01g0130000(OsMTP9),Os01g0133400(Os…	MSTRG.19036(psbD),MSTRG.27954(--),MSTRG.5087(ndhF),MSTRG.7378(DTC),MSTRG.8198(At3g47570),MSTRG.9497(ndhF),Os01g0110100(Pho1),Os01g0126200(OsLPR2),Os01g0161000(-),Os01g0171000(OsSERL5),Os01g0179800(-),Os01g0229600(-),Os01g0329900(OsGELP14),Os01g0388101(-),Os01g0547600(NRT2.4),Os01g0589800(-),Os01g0627400(OsCYP72A17),Os01g0666600(-),Os01g0669100(OsLSK1),Os01g0674800(-),Os01g0694000(-),Os01g0750300(…
GO:0005575	Cellular Component	GO:0009295	nucleoid	11	0	Os01g0829000(-),Os01g0895100(-),Os02g0754300(-),Os03g0425000(AL1a),Os03g0602600(HSA1),Os03g0812000(-),Os03g0824100(OspTAC2),Os05g0509700(SSB),Os05g0587200(OsSET23),Os06g0115400(OsFSD1.1),Os11g0425300(-)	--
GO:0005575	Cellular Component	GO:0044425	membrane part	1193	154	MSTRG.11068(CALS8),MSTRG.32226(NAD9),MSTRG.6412(DTX44),MSTRG.9475(atpH),Os01g0100900(SPL1),Os01g0103600(-),Os01g0116400(-),Os01g0116900(-),Os01g0118700(-),Os01g0120800(eIF-3a),Os01g0121300(-),Os01g0121500(-),Os01g0130000(OsMTP9),Os01g0133400(OsPGLCT),Os01g0136700(-),Os01g0136800(OsWAK2),Os01g0136900(-),Os01g0137500(OsRLCK22),Os01g0138400(-),Os01g0152000(-),Os01g0173900(OsABCC3),Os01g0187400(-),Os…	MSTRG.19036(psbD),MSTRG.5087(ndhF),MSTRG.7378(DTC),MSTRG.8198(At3g47570),MSTRG.9497(ndhF),Os01g0110100(Pho1),Os01g0126200(OsLPR2),Os01g0161000(-),Os01g0171000(OsSERL5),Os01g0179800(-),Os01g0229600(-),Os01g0329900(OsGELP14),Os01g0388101(-),Os01g0547600(NRT2.4),Os01g0627400(OsCYP72A17),Os01g0666600(-),Os01g0669100(OsLSK1),Os01g0674800(-),Os01g0694000(-),Os01g0750300(OsCesA4),Os01g0763700(-),Os01g07…
GO:0005575	Cellular Component	GO:0005576	extracellular region	118	32	Os01g0124200(RBBI3-1),Os01g0267300(OsSRP-QKG),Os01g0270100(-),Os01g0296200(OsPGL13),Os01g0327100(prx15),Os01g0339900(PDIL2),Os01g0382000(OsPR1b),Os01g0580200(OsBgal3),Os01g0619800(-),Os01g0624000(-),Os01g0660200(C10728),Os01g0687400(-),Os01g0746700(-),Os01g0788400(OsPME6),Os01g0794800(-),Os01g0795400(Hwi2),Os01g0803200(Oc1*),Os01g0850550(OsLAC7),Os01g0860500(C10501),Os01g0879200(DRR206),Os01g0892…	Os01g0124000(RBBI2-1),Os01g0823100(OsEXP2),Os01g0842500(OsLAC5),Os01g0860400(-),Os01g0952100(OsGLP1-5),Os02g0240100(prx30),Os02g0240300(prx29),Os03g0210000(-),Os04g0364800(-),Os04g0398700(PS1),Os04g0689000(prx64),Os05g0374200(OsCKX9),Os05g0384300(-),Os05g0477600(OsEXP4),Os06g0209100(-),Os06g0306300(prx78),Os06g0547400(prx86),Os07g0676900(prx109),Os07g0677100(POX8.1),Os07g0677400(POX5.1),Os07g0694…
GO:0005575	Cellular Component	GO:0030054	cell junction	54	5	MSTRG.25008(NRPA1),MSTRG.7056(Os05g0567100),Os01g0128400(-),Os01g0235400(-),Os01g0327000(prx14),Os01g0327100(prx15),Os01g0375000(Os_F0781),Os01g0617500(-),Os01g0864500(OsSDS1),Os01g0911200(-),Os01g0916200(-),Os01g0962700(prx20),Os01g0963000(prx22),Os01g0966000(-),Os02g0105500(-),Os02g0274100(AIM1),Os02g0666200(OsPIP1a),Os02g0823100(OsPIP1),Os03g0218400(OsMST4),Os03g0586800(-),Os03g0843300(OsLEA7)…	MSTRG.7378(DTC),Os01g0952100(OsGLP1-5),Os04g0689000(prx64),Os06g0306300(prx78),Os07g0694300(prx116)
GO:0005575	Cellular Component	GO:0055044	symplast	52	4	Os01g0128400(-),Os01g0235400(-),Os01g0327000(prx14),Os01g0327100(prx15),Os01g0375000(Os_F0781),Os01g0617500(-),Os01g0864500(OsSDS1),Os01g0911200(-),Os01g0916200(-),Os01g0962700(prx20),Os01g0963000(prx22),Os01g0966000(-),Os02g0105500(-),Os02g0274100(AIM1),Os02g0666200(OsPIP1a),Os02g0823100(OsPIP1),Os03g0218400(OsMST4),Os03g0586800(-),Os03g0843300(OsLEA7),Os03g0853200(OsTET6),Os04g0559700(OsPIP1),O…	Os01g0952100(OsGLP1-5),Os04g0689000(prx64),Os06g0306300(prx78),Os07g0694300(prx116)
GO:0005575	Cellular Component	GO:0043226	organelle	1651	157	MSTRG.11273(CLPB1),MSTRG.11428(RE1),MSTRG.12170(--),MSTRG.13824(--),MSTRG.14792(SIT2),MSTRG.15580(AQR),MSTRG.17235(GYRA),MSTRG.19587(Rv2228c),MSTRG.19806(MORF2),MSTRG.23349(TY3B-G),MSTRG.24100(Rv2228c),MSTRG.24228(--),MSTRG.24639(TY3B-I),MSTRG.2468(RLT2),MSTRG.25008(NRPA1),MSTRG.25943(SIT2),MSTRG.25944(SIT2),MSTRG.26284(TY3B-I),MSTRG.26888(GIP),MSTRG.27191(At2g04865),MSTRG.27765(RE2),MSTRG.29379(…	MSTRG.10948(--),MSTRG.1102(RE1),MSTRG.11417(--),MSTRG.1271(--),MSTRG.17868(--),MSTRG.18085(--),MSTRG.19036(psbD),MSTRG.2032(--),MSTRG.20485(TY3B-I),MSTRG.23498(--),MSTRG.23500(--),MSTRG.25074(--),MSTRG.25474(--),MSTRG.27954(--),MSTRG.29047(--),MSTRG.5074(--),MSTRG.5087(ndhF),MSTRG.6869(TY3B-I),MSTRG.7378(DTC),MSTRG.8198(At3g47570),MSTRG.8886(TY3B-G),MSTRG.918(--),MSTRG.9497(ndhF),Os01g0110100(Pho…
GO:0005575	Cellular Component	GO:0031974	membrane-enclosed lumen	174	1	Os01g0143800(-),Os01g0174900(OsGRX1),Os01g0191500(-),Os01g0251100(-),Os01g0253300(rImpa1a),Os01g0375000(Os_F0781),Os01g0511200(-),Os01g0530400(OsGRX5),Os01g0583200(-),Os01g0655400(-),Os01g0679000(-),Os01g0739000(-),Os01g0837500(OsRuvBL1a),Os01g0846900(-),Os01g0868300(OSPOLA),Os01g0885000(-),Os01g0909500(-),Os01g0920200(-),Os01g0925000(-),Os01g0945800(HNR27C),Os01g0959000(-),Os01g0966300(-),Os02g0…	Os07g0645200(-)
GO:0005575	Cellular Component	GO:0031012	extracellular matrix	1	0	Os02g0740700(OsMMP1)	--
GO:0005575	Cellular Component	GO:0044421	extracellular region part	18	3	Os01g0267300(OsSRP-QKG),Os01g0382000(OsPR1b),Os01g0794800(-),Os01g0795400(Hwi2),Os02g0469600(-),Os03g0610650(OsSRP-LRS),Os04g0523500(OsCKX8),Os04g0573200(SOD),Os04g0670200(-),Os05g0508300(-),Os07g0127500(OsPR1#072),Os07g0127600(OsPR1#073),Os07g0127700(PR1b),Os07g0129300(OsPR1),Os08g0561700(OsSOD4),Os09g0442300(-),Os10g0191300(OsPR1#101),Os10g0483500(OsCKX3)	Os04g0398700(PS1),Os05g0374200(OsCKX9),Os09g0564000(-)
GO:0005575	Cellular Component	GO:0099512	supramolecular fiber	15	2	Os01g0125800(AIP1),Os01g0683100(OsKTN60),Os02g0274100(AIM1),Os03g0105600(OsTUB2),Os03g0200200(-),Os03g0726100(OsTubA3),Os04g0665400(FtsZ1),Os05g0154500(-),Os05g0156600(-),Os06g0251700(-),Os06g0671900(OsTUB3),Os07g0512200(Atg8),Os07g0574800(OsTubA1),Os09g0446200(-),Os11g0247300(TID1)	Os01g0282800(OsTUB1),Os05g0413200(TUB6)

## Sheet: ZJ22c-vs-zj-esc
All enrichment GO terms of mRNAs of the comparison between ZJ22c and zj-esc.
GO ID (level1)	GO Term (level1)	GO ID (level2)	GO Term (level2)	number_of_ZJ22c-vs-Pir1c (up)	number_of_ZJ22c-vs-Pir1c (down)	Genes_of_ZJ22c-vs-Pir1c_up	Genes_of_ZJ22c-vs-Pir1c_down
GO:0008150	Biological Process	GO:0044699	single-organism process	1784	234	MSTRG.10517(NAC021),MSTRG.11068(CALS8),MSTRG.13824(--),MSTRG.15490(SCAB1),MSTRG.16908(TIC214),MSTRG.18052(ndhB1),MSTRG.18399(ALA2),MSTRG.24928(atpB),MSTRG.25968(JUB1),MSTRG.2635(ABCB11),MSTRG.27676(CAMTA2),MSTRG.28425(--),MSTRG.30605(ATPA),MSTRG.31000(TPS9),MSTRG.32004(NRPD1),MSTRG.32198(atpH),MSTRG.32225(RPL5),MSTRG.3270(ndhB1),MSTRG.3364(CYP94B1),MSTRG.4652(MIK2),MSTRG.6412(DTX44),MSTRG.6848(--…
556200(-),Os12g0556300(-),Os12g0556500(-),Os12g0560300(OsARL1f),Os12g0562100(-),Os12g0562400(OsPLC3),Os12g0571900(-),Os12g0580400(OsPUT2),Os12g0581600(OsNRAMP7),Os12g0586600(osACA2),Os12g0595800(-),Os12g0597500(OsUAH),Os12g0600400(-),Os12g0607000(-),Os12g0608500(-),Os12g0608900(-),Os12g0609200(-),Os12g0612100(-),Os12g0613700(OsARF6b),Os12g0615400(-),Os12g0616500(OsCHX15),Os12g0623900(-),Os12g0624…	MSTRG.10139(RUP1),MSTRG.1319(OCT2),MSTRG.19036(psbD),MSTRG.20157(atpH),MSTRG.30707(PBL3),MSTRG.3725(NAT12),MSTRG.5087(ndhF),MSTRG.614(YSL8),MSTRG.7378(DTC),MSTRG.9497(ndhF),Os01g0192000(DOS),Os01g0200300(Oshox29),Os01g0200700(OsMT3a),Os01g0227800(-),Os01g0232000(OsTIP4),Os01g0238500(-),Os01g0243100(-),Os01g0264700(-),Os01g0274100(OsYUCCA10),Os01g0307500(SKC1),Os01g0326100(RP-2),Os01g0326300(-),Os…
GO:0008150	Biological Process	GO:0051179	localization	580	67	MSTRG.13824(--),MSTRG.18052(ndhB1),MSTRG.18399(ALA2),MSTRG.24928(atpB),MSTRG.25008(NRPA1),MSTRG.2635(ABCB11),MSTRG.2642(ABCB21),MSTRG.30605(ATPA),MSTRG.32198(atpH),MSTRG.3270(ndhB1),MSTRG.7056(Os05g0567100),MSTRG.7572(BAK1),MSTRG.9376(--),MSTRG.9475(atpH),Os01g0128800(OsNTMC2T3),Os01g0130000(OsMTP9),Os01g0133400(OsPGLCT),Os01g0173900(OsABCC3),Os01g0191500(-),Os01g0209800(OsCAT1),Os01g0225000(-),O…	MSTRG.20157(atpH),MSTRG.30707(PBL3),MSTRG.3725(NAT12),MSTRG.5087(ndhF),MSTRG.614(YSL8),MSTRG.7378(DTC),MSTRG.9497(ndhF),Os01g0232000(OsTIP4),Os01g0264700(-),Os01g0307500(SKC1),Os01g0547600(NRT2.4),Os01g0803300(-),Os01g0817000(-),Os01g0882800(OsAAP11E),Os01g0902700(-),Os02g0159200(-),Os02g0211000(OsABCA1),Os02g0301100(OsSWEET4),Os02g0318450(-),Os02g0470600(-),Os02g0695800(OsOPT8),Os02g0730600(OsST…
GO:0008150	Biological Process	GO:0051704	multi-organism process	136	15	MSTRG.25968(JUB1),MSTRG.27676(CAMTA2),MSTRG.4664(PUB21),MSTRG.7572(BAK1),Os01g0134700(-),Os01g0223900(-),Os01g0224000(-),Os01g0279700(OsPT21),Os01g0327600(-),Os01g0501700(OsTATC),Os01g0580100(-),Os01g0642700(-),Os01g0668901(-),Os01g0670100(-),Os01g0686800(RACK1),Os01g0767900(OsNH2),Os01g0853400(OsCOI1a),Os01g0871000(-),Os01g0884300(OsNAC6),Os01g0885700(-),Os01g0923700(HK3),Os01g0934000(OsATG18c),…	MSTRG.30707(PBL3),Os01g0669100(OsLSK1),Os01g0750300(OsCesA4),Os01g0784700(-),Os01g0849000(OsLTPd5),Os01g0882500(-),Os04g0401000(PI21),Os04g0632901(-),Os04g0633200(-),Os05g0160300(OsLTPd8),Os07g0290200(OsLTPd4),Os07g0694300(prx116),Os10g0555900(OsEXPB3),Os10g0556100(OsEXPB4),Os11g0524300(-)
GO:0008150	Biological Process	GO:0002376	immune system process	35	5	MSTRG.25968(JUB1),MSTRG.32004(NRPD1),MSTRG.6848(--),MSTRG.7572(BAK1),Os01g0134700(-),Os01g0327600(-),Os01g0390900(OsDsPTP1),Os01g0575500(OsWD40-16),Os01g0958700(-),Os02g0327000(OsGAP1),Os02g0603800(OsHDS),Os02g0629400(-),Os03g0146400(OsPAO),Os03g0172000(MOS3/SAR3),Os03g0195100(OsALD1),Os03g0270000(-),Os03g0299900(OsAGD2),Os03g0438100(AOC),Os03g0643300(OsOAT),Os03g0669200(OsWD40-80),Os03g0698900(-…	MSTRG.30707(PBL3),Os01g0849000(OsLTPd5),Os01g0882500(-),Os05g0160300(OsLTPd8),Os07g0290200(OsLTPd4)
GO:0008150	Biological Process	GO:0050896	response to stimulus	615	86	MSTRG.10517(NAC021),MSTRG.24228(--),MSTRG.25968(JUB1),MSTRG.27676(CAMTA2),MSTRG.30605(ATPA),MSTRG.31000(TPS9),MSTRG.32004(NRPD1),MSTRG.4652(MIK2),MSTRG.4664(PUB21),MSTRG.4984(--),MSTRG.6848(--),MSTRG.7056(Os05g0567100),MSTRG.7572(BAK1),MSTRG.7894(PDC1),MSTRG.9419(ATJ15),Os01g0106900(OsDXR),Os01g0107900(-),Os01g0118000(-),Os01g0134700(-),Os01g0174300(-),Os01g0182600(GI),Os01g0187900(-),Os01g019770…	MSTRG.10139(RUP1),MSTRG.30707(PBL3),MSTRG.7378(DTC),Os01g0192000(DOS),Os01g0278000(OsVQ1),Os01g0326100(RP-2),Os01g0326300(-),Os01g0547600(NRT2.4),Os01g0639900(BETACA1),Os01g0687300(-),Os01g0743800(OsPHP1),Os01g0750300(OsCesA4),Os01g0849000(OsLTPd5),Os01g0882500(-),Os02g0110200(HPL3),Os02g0173900(OsALDH5F1),Os02g0178800(OsGL1-2),Os02g0240100(prx30),Os02g0240300(prx29),Os02g0272900(-),Os02g0568200(…
GO:0008150	Biological Process	GO:0048511	rhythmic process	11	1	Os01g0182600(GI),Os01g0281100(-),Os01g0498200(-),Os02g0115700(CATA1),Os03g0284100(OsPRR73),Os03g0387900(-),Os03g0438100(AOC),Os05g0549100(OsSTN7),Os06g0727200(CATB),Os10g0498700(OsMed16_1),Os11g0547000(FKF1)	Os08g0230300(Os_F0765)
GO:0008150	Biological Process	GO:0040011	locomotion	6	2	Os01g0580100(-),Os02g0742200(OsRac3),Os03g0285800(OsMSRMK2),Os08g0544500(LPL3),Os10g0370500(-),Os10g0370800(-)	Os05g0244500(-),Os11g0524300(-)
GO:0008150	Biological Process	GO:0023052	signaling	231	23	MSTRG.10517(NAC021),MSTRG.4652(MIK2),MSTRG.6848(--),MSTRG.7572(BAK1),Os01g0197700(Gn1a),Os01g0227300(OsRab7B1),Os01g0253100(-),Os01g0259200(OsRLCK28),Os01g0267900(OsCam1-3),Os01g0279300(OsCaM3),Os01g0286100(PIL15),Os01g0310500(OsRLCK31),Os01g0390900(OsDsPTP1),Os01g0505600(OsCML11),Os01g0622600(OsCDPK1),Os01g0665200(OsMPK20-4),Os01g0668901(-),Os01g0675700(OsIAA5),Os01g0686800(RACK1),Os01g0689900(O…	MSTRG.30707(PBL3),Os01g0192000(DOS),Os01g0743800(OsPHP1),Os02g0723400(OsIAA8),Os03g0226300(OsRLCK104),Os03g0227700(OsDWF4),Os03g0292700(-),Os04g0310400(OsWAK36),Os04g0442000(OsARF9),Os04g0517500(-),Os04g0577200(-),Os05g0392050(-),Os05g0398800(-),Os05g0498900(OsRLCK189),Os05g0589700(OsRLCK191),Os06g0185966(-),Os06g0597000(OsIAA23),Os06g0601500(OsbZIP48),Os07g0498400(-),Os08g0169700(-),Os08g0378000…
GO:0008150	Biological Process	GO:0098754	detoxification	31	16	Os01g0327000(prx14),Os01g0327100(prx15),Os01g0543100(prx17),Os01g0962700(prx20),Os01g0963000(prx22),Os02g0115700(CATA1),Os02g0192700(Pre),Os02g0635000(OsNIT1),Os02g0635200(NIT1),Os02g0813500(OsGR2),Os03g0358100(OsGpx2),Os03g0729200(-),Os03g0762300(-),Os03g0762400(prx51),Os04g0434800(OsAPx7),Os04g0556000(HMA5),Os04g0602100(-),Os04g0651000(prx57),Os04g0688500(prx62),Os05g0162000(prx72),Os05g0323900…	Os01g0326100(RP-2),Os01g0326300(-),Os02g0240100(prx30),Os02g0240300(prx29),Os03g0284600(-),Os04g0683850(-),Os06g0306300(prx78),Os06g0547400(prx86),Os07g0676900(prx109),Os07g0677100(POX8.1),Os07g0677200(POX22.3),Os07g0677400(POX5.1),Os07g0677500(POX3006),Os07g0694300(prx116),Os09g0471100(prx122),Os10g0109300(PRX125)
GO:0008150	Biological Process	GO:0032501	multicellular organismal process	182	24	MSTRG.10517(NAC021),MSTRG.11068(CALS8),MSTRG.25968(JUB1),MSTRG.7572(BAK1),MSTRG.9376(--),Os01g0127300(OsABCI4),Os01g0150000(CER10),Os01g0169500(-),Os01g0182600(GI),Os01g0197700(Gn1a),Os01g0208700(PEPC-2),Os01g0218032(ROS1A),Os01g0223900(-),Os01g0224000(-),Os01g0232700(-),Os01g0257300(OsRAA1),Os01g0321700(-),Os01g0546900(JMJ709),Os01g0550000(AIP2),Os01g0575500(OsWD40-16),Os01g0580100(-),Os01g06145…	Os01g0192000(DOS),Os01g0200300(Oshox29),Os01g0645400(YUCCA1),Os01g0669100(OsLSK1),Os01g0687300(-),Os01g0784700(-),Os01g0889400(CRL1L3),Os02g0173900(OsALDH5F1),Os02g0606200(OsBBX4),Os02g0646200(OsBBX6),Os02g0697400(4CL2),Os03g0227700(OsDWF4),Os03g0637800(OsCR4),Os04g0387300(-),Os04g0632901(-),Os04g0633200(-),Os05g0101600(-),Os06g0601500(OsbZIP48),Os06g0610350(MOC1),Os06g0654900(OsBBX20),Os06g06966…
GO:0008150	Biological Process	GO:0040007	growth	29	3	Os01g0575500(OsWD40-16),Os01g0857000(OsCPL2),Os01g0884300(OsNAC6),Os01g0888800(-),Os01g0923700(HK3),Os02g0204700(OsCYP734A2),Os03g0438100(AOC),Os03g0695700(OsCBSCLC4),Os04g0457800(OsSERK2),Os04g0648800(OsHIP1),Os04g0660100(Os),Os05g0593100(-),Os06g0600400(OsCYP734A4),Os06g0716700(GRP94),Os07g0209000(OsDGL1),Os07g0563800(-),Os07g0597200(-),Os07g0675000(-),Os08g0104100(-),Os08g0159000(-),Os08g01910…	Os01g0200300(Oshox29),Os03g0227700(OsDWF4),Os08g0174500(HD5)
GO:0008150	Biological Process	GO:0009987	cellular process	2380	261	MSTRG.10517(NAC021),MSTRG.11068(CALS8),MSTRG.11084(--),MSTRG.12170(--),MSTRG.14101(TY3B-I),MSTRG.14792(SIT2),MSTRG.15490(SCAB1),MSTRG.17740(Rv2228c),MSTRG.18052(ndhB1),MSTRG.19587(Rv2228c),MSTRG.23349(TY3B-G),MSTRG.24100(Rv2228c),MSTRG.24228(--),MSTRG.24928(atpB),MSTRG.25008(NRPA1),MSTRG.25943(SIT2),MSTRG.25944(SIT2),MSTRG.25968(JUB1),MSTRG.25977(SD25),MSTRG.2635(ABCB11),MSTRG.26986(TY3B-I),MSTRG…
1),Os07g0675000(-),Os07g0678600(OsCIPK02),Os07g0680000(VSR3),Os07g0683200(ONAC103),Os07g0684800(ONAC015),Os07g0686800(OsRLCK241),Os07g0687000(CIPK03),Os07g0687200(OsCam1-2),Os07g0687400(OsVQ31),Os07g0693700(-),Os07g0694000(OsPI-PLC1),Os07g0694500(-),Os07g0694700(APX2),Os07g0694800(-),Os07g0695800(-),Os08g0102100(-),Os08g0104100(-),Os08g0104700(-),Os08g0104900(-),Os08g0106501(-),Os08g0110700(FSE1)…	MSTRG.10139(RUP1),MSTRG.11417(--),MSTRG.1319(OCT2),MSTRG.17045(--),MSTRG.17868(--),MSTRG.19036(psbD),MSTRG.20157(atpH),MSTRG.20485(TY3B-I),MSTRG.21042(--),MSTRG.23499(--),MSTRG.25074(--),MSTRG.29047(--),MSTRG.30707(PBL3),MSTRG.3725(NAT12),MSTRG.4318(Rv2228c),MSTRG.5087(ndhF),MSTRG.545(B'KAPPA),MSTRG.7378(DTC),MSTRG.9497(ndhF),Os01g0117300(OsRLCK17),Os01g0123900(RBBI2-2),Os01g0124000(RBBI2-1),Os01…
GO:0008150	Biological Process	GO:0048518	positive regulation of biological process	154	10	Os01g0125800(AIP1),Os01g0134700(-),Os01g0143800(-),Os01g0165000(DREB2A),Os01g0169500(-),Os01g0321700(-),Os01g0338000(OsARL1e),Os01g0546900(JMJ709),Os01g0547200(-),Os01g0626900(-),Os01g0668300(-),Os01g0680400(-),Os01g0686800(RACK1),Os01g0746200(NUP85),Os01g0749300(HSFA4A),Os01g0813900(-),Os01g0826400(OsWRKY24),Os01g0884300(OsNAC6),Os01g0888800(-),Os01g0920200(-),Os01g0923600(CAMTA),Os01g0925700(-)…	MSTRG.30707(PBL3),Os02g0580400(-),Os02g0671300(OsbHLH076),Os03g0251800(-),Os03g0292700(-),Os05g0390800(OsVQ19),Os05g0520300(OsGATA1),Os07g0556000(CycD6),Os08g0174500(HD5),Os08g0479300(CycD4)
GO:0008150	Biological Process	GO:0008152	metabolic process	2185	269	MSTRG.10517(NAC021),MSTRG.11068(CALS8),MSTRG.11084(--),MSTRG.12170(--),MSTRG.1379(--),MSTRG.14101(TY3B-I),MSTRG.14792(SIT2),MSTRG.16908(TIC214),MSTRG.17740(Rv2228c),MSTRG.18052(ndhB1),MSTRG.18374(--),MSTRG.19587(Rv2228c),MSTRG.23349(TY3B-G),MSTRG.24100(Rv2228c),MSTRG.24228(--),MSTRG.24928(atpB),MSTRG.25008(NRPA1),MSTRG.25943(SIT2),MSTRG.25944(SIT2),MSTRG.25968(JUB1),MSTRG.25977(SD25),MSTRG.26888(…
),Os09g0293900(OsFKBP53),Os09g0298100(OsPFPA4),Os09g0306700(PFT1),Os09g0306800(OsEMF2b),Os09g0309200(-),Os09g0315700(Osppc2b),Os09g0315800(-),Os09g0323000(OsUGE4),Os09g0325700(PP2C1),Os09g0327300(-),Os09g0334500(WRKY74),Os09g0334800(-),Os09g0338400(OsISC1),Os09g0344500(ZRP4),Os09g0344800(-),Os09g0359800(OsPRMT1),Os09g0362500(-),Os09g0362800(-),Os09g0364000(OsC3H59),Os09g0365900(OsORAP1),Os09g0368…	MSTRG.11417(--),MSTRG.17045(--),MSTRG.17868(--),MSTRG.19036(psbD),MSTRG.20157(atpH),MSTRG.20485(TY3B-I),MSTRG.21042(--),MSTRG.23499(--),MSTRG.25074(--),MSTRG.29047(--),MSTRG.30707(PBL3),MSTRG.4318(Rv2228c),MSTRG.5087(ndhF),MSTRG.545(B'KAPPA),MSTRG.7378(DTC),MSTRG.8350(--),MSTRG.9497(ndhF),Os01g0117300(OsRLCK17),Os01g0123900(RBBI2-2),Os01g0124000(RBBI2-1),Os01g0191200(-),Os01g0192900(OsACS5),Os01g…
GO:0008150	Biological Process	GO:0000003	reproduction	113	12	MSTRG.10517(NAC021),MSTRG.7572(BAK1),Os01g0127300(OsABCI4),Os01g0169500(-),Os01g0182600(GI),Os01g0193900(OsALYL1),Os01g0197700(Gn1a),Os01g0223900(-),Os01g0224000(-),Os01g0257300(OsRAA1),Os01g0321700(-),Os01g0501700(OsTATC),Os01g0550000(AIP2),Os01g0580100(-),Os01g0617500(-),Os01g0642700(-),Os01g0668901(-),Os01g0670100(-),Os01g0812000(GAMYB),Os01g0813500(-),Os01g0871000(-),Os01g0871300(-),Os01g0885…	Os01g0200300(Oshox29),Os01g0669100(OsLSK1),Os01g0784700(-),Os02g0173900(OsALDH5F1),Os03g0637800(OsCR4),Os04g0632901(-),Os04g0633200(-),Os06g0654900(OsBBX20),Os08g0174500(HD5),Os09g0451400(ACO2),Os10g0555900(OsEXPB3),Os10g0556100(OsEXPB4)
GO:0008150	Biological Process	GO:0022414	reproductive process	112	12	MSTRG.10517(NAC021),MSTRG.7572(BAK1),Os01g0127300(OsABCI4),Os01g0169500(-),Os01g0182600(GI),Os01g0197700(Gn1a),Os01g0223900(-),Os01g0224000(-),Os01g0257300(OsRAA1),Os01g0321700(-),Os01g0501700(OsTATC),Os01g0550000(AIP2),Os01g0580100(-),Os01g0617500(-),Os01g0642700(-),Os01g0668901(-),Os01g0670100(-),Os01g0812000(GAMYB),Os01g0813500(-),Os01g0871000(-),Os01g0871300(-),Os01g0885700(-),Os01g0890900(Os…	Os01g0200300(Oshox29),Os01g0669100(OsLSK1),Os01g0784700(-),Os02g0173900(OsALDH5F1),Os03g0637800(OsCR4),Os04g0632901(-),Os04g0633200(-),Os06g0654900(OsBBX20),Os08g0174500(HD5),Os09g0451400(ACO2),Os10g0555900(OsEXPB3),Os10g0556100(OsEXPB4)
GO:0008150	Biological Process	GO:0032502	developmental process	175	25	MSTRG.10517(NAC021),MSTRG.11068(CALS8),MSTRG.25968(JUB1),MSTRG.7572(BAK1),MSTRG.9376(--),Os01g0127300(OsABCI4),Os01g0150000(CER10),Os01g0169500(-),Os01g0182600(GI),Os01g0191900(R2R3-MYB),Os01g0197700(Gn1a),Os01g0208700(PEPC-2),Os01g0218032(ROS1A),Os01g0232700(-),Os01g0257300(OsRAA1),Os01g0321700(-),Os01g0546900(JMJ709),Os01g0550000(AIP2),Os01g0575500(OsWD40-16),Os01g0580100(-),Os01g0614500(-),Os0…	Os01g0192000(DOS),Os01g0200300(Oshox29),Os01g0645400(YUCCA1),Os01g0687300(-),Os01g0889400(CRL1L3),Os02g0173900(OsALDH5F1),Os02g0606200(OsBBX4),Os02g0646200(OsBBX6),Os02g0695200(OsMYB58/63-L),Os02g0697400(4CL2),Os03g0227700(OsDWF4),Os03g0637800(OsCR4),Os04g0387300(-),Os05g0101600(-),Os05g0520300(OsGATA1),Os06g0258000(R2R3-MYB),Os06g0601500(OsbZIP48),Os06g0610350(MOC1),Os06g0654900(OsBBX20),Os06g06…
GO:0008150	Biological Process	GO:0071840	cellular component organization or biogenesis	437	32	MSTRG.11068(CALS8),MSTRG.32004(NRPD1),MSTRG.32198(atpH),MSTRG.7572(BAK1),MSTRG.800(--),MSTRG.9475(atpH),Os01g0100700(RPS5),Os01g0120800(eIF-3a),Os01g0125800(AIP1),Os01g0127300(OsABCI4),Os01g0143800(-),Os01g0150000(CER10),Os01g0153100(OsFbox002),Os01g0184000(-),Os01g0191500(-),Os01g0197900(OsRDR3),Os01g0208600(ES1),Os01g0232400(-),Os01g0257300(OsRAA1),Os01g0277600(osALA2),Os01g0321700(-),Os01g0338…	MSTRG.20157(atpH),Os01g0750300(OsCesA4),Os01g0763700(-),Os01g0805900(OsTUB4),Os01g0823100(OsEXP2),Os01g0882500(-),Os02g0697400(4CL2),Os02g0782500(OsHSP18.0-CIII),Os03g0131900(OscpSRP43),Os03g0203100(-),Os03g0209500(-),Os03g0227700(OsDWF4),Os03g0844900(-),Os04g0369000(OsRLCK144),Os05g0244500(-),Os05g0426400(-),Os05g0470800(-),Os05g0477600(OsEXP4),Os06g0167000(-),Os06g0696600(OsXTH12),Os07g0556000(…
GO:0008150	Biological Process	GO:0048519	negative regulation of biological process	104	19	MSTRG.12170(--),MSTRG.14101(TY3B-I),MSTRG.17740(Rv2228c),MSTRG.19587(Rv2228c),MSTRG.23349(TY3B-G),MSTRG.24100(Rv2228c),MSTRG.25968(JUB1),MSTRG.26986(TY3B-I),MSTRG.28361(--),MSTRG.28363(--),MSTRG.30299(--),MSTRG.32004(NRPD1),MSTRG.5806(--),MSTRG.7689(TY3B-G),Os01g0124200(RBBI3-1),Os01g0169500(-),Os01g0197900(OsRDR3),Os01g0257300(OsRAA1),Os01g0260700(-),Os01g0267300(OsSRP-QKG),Os01g0286100(PIL15),O…	MSTRG.11417(--),MSTRG.17045(--),MSTRG.17868(--),MSTRG.20485(TY3B-I),MSTRG.23499(--),MSTRG.25074(--),MSTRG.29047(--),MSTRG.4318(Rv2228c),Os01g0123900(RBBI2-2),Os01g0124000(RBBI2-1),Os01g0823500(OsOFP4),Os03g0429000(-),Os03g0755700(-),Os04g0433900(-),Os05g0392050(-),Os05g0517100(OsOFP25),Os08g0174500(HD5),Os10g0508700(-),Os11g0156300(OsOFP18)
GO:0008150	Biological Process	GO:0065007	biological regulation	750	90	MSTRG.10517(NAC021),MSTRG.12170(--),MSTRG.14101(TY3B-I),MSTRG.15490(SCAB1),MSTRG.17740(Rv2228c),MSTRG.19587(Rv2228c),MSTRG.23349(TY3B-G),MSTRG.24100(Rv2228c),MSTRG.25968(JUB1),MSTRG.26986(TY3B-I),MSTRG.2738(XI-C),MSTRG.28361(--),MSTRG.28363(--),MSTRG.30299(--),MSTRG.32004(NRPD1),MSTRG.4652(MIK2),MSTRG.5806(--),MSTRG.6848(--),MSTRG.7572(BAK1),MSTRG.7689(TY3B-G),Os01g0120400(-),Os01g0124200(RBBI3-1…	MSTRG.11417(--),MSTRG.17045(--),MSTRG.17868(--),MSTRG.20485(TY3B-I),MSTRG.23499(--),MSTRG.25074(--),MSTRG.29047(--),MSTRG.30707(PBL3),MSTRG.4318(Rv2228c),MSTRG.545(B'KAPPA),MSTRG.8350(--),Os01g0123900(RBBI2-2),Os01g0124000(RBBI2-1),Os01g0192000(DOS),Os01g0200300(Oshox29),Os01g0200700(OsMT3a),Os01g0388101(-),Os01g0566800(OsbHLH117),Os01g0639900(BETACA1),Os01g0645400(YUCCA1),Os01g0687300(-),Os01g07…
GO:0008150	Biological Process	GO:0050789	regulation of biological process	668	79	MSTRG.10517(NAC021),MSTRG.12170(--),MSTRG.14101(TY3B-I),MSTRG.15490(SCAB1),MSTRG.17740(Rv2228c),MSTRG.19587(Rv2228c),MSTRG.23349(TY3B-G),MSTRG.24100(Rv2228c),MSTRG.25968(JUB1),MSTRG.26986(TY3B-I),MSTRG.2738(XI-C),MSTRG.28361(--),MSTRG.28363(--),MSTRG.30299(--),MSTRG.32004(NRPD1),MSTRG.4652(MIK2),MSTRG.5806(--),MSTRG.6848(--),MSTRG.7572(BAK1),MSTRG.7689(TY3B-G),Os01g0120400(-),Os01g0124200(RBBI3-1…	MSTRG.11417(--),MSTRG.17045(--),MSTRG.17868(--),MSTRG.20485(TY3B-I),MSTRG.23499(--),MSTRG.25074(--),MSTRG.29047(--),MSTRG.30707(PBL3),MSTRG.4318(Rv2228c),MSTRG.545(B'KAPPA),MSTRG.8350(--),Os01g0123900(RBBI2-2),Os01g0124000(RBBI2-1),Os01g0192000(DOS),Os01g0200300(Oshox29),Os01g0566800(OsbHLH117),Os01g0639900(BETACA1),Os01g0645400(YUCCA1),Os01g0687300(-),Os01g0743800(OsPHP1),Os01g0823500(OsOFP4),Os…
GO:0003674	Molecular Function	GO:0003824	catalytic activity	1904	262	MSTRG.11068(CALS8),MSTRG.11084(--),MSTRG.14792(SIT2),MSTRG.16908(TIC214),MSTRG.18052(ndhB1),MSTRG.18359(TPS7),MSTRG.18365(TPS7),MSTRG.18374(--),MSTRG.18399(ALA2),MSTRG.24928(atpB),MSTRG.25008(NRPA1),MSTRG.25943(SIT2),MSTRG.25944(SIT2),MSTRG.25977(SD25),MSTRG.2635(ABCB11),MSTRG.2642(ABCB21),MSTRG.26888(GIP),MSTRG.27034(brd9),MSTRG.2738(XI-C),MSTRG.28356(GIP),MSTRG.28425(--),MSTRG.29911(--),MSTRG.3…
Os11g0217300(-),Os11g0220400(-),Os11g0222000(OsCRR4),Os11g0237700(-),Os11g0244100(-),Os11g0245100(OsGSTZ4),Os11g0246600(OsDegp12),Os11g0247300(TID1),Os11g0249900(-),Os11g0256900(-),Os11g0264000(OsLAC22),Os11g0274700(OsRLCK322),Os11g0275200(-),Os11g0286800(OsOSC10),Os11g0289700(-),Os11g0294600(-),Os11g0298400(-),Os11g0310800(-),Os11g0384789(-),Os11g0416900(OsABCG28),Os11g0447300(OsRALF-1),Os11g045…	MSTRG.10139(RUP1),MSTRG.19036(psbD),MSTRG.20157(atpH),MSTRG.30707(PBL3),MSTRG.5087(ndhF),MSTRG.9497(ndhF),Os01g0117300(OsRLCK17),Os01g0191200(-),Os01g0192900(OsACS5),Os01g0227800(-),Os01g0238500(-),Os01g0243100(-),Os01g0274100(OsYUCCA10),Os01g0326100(RP-2),Os01g0326300(-),Os01g0329900(OsGELP14),Os01g0332800(OsSCP3),Os01g0362100(-),Os01g0388101(-),Os01g0529800(-),Os01g0598600(-),Os01g0607900(OsRPK…
GO:0003674	Molecular Function	GO:0005215	transporter activity	295	46	MSTRG.18399(ALA2),MSTRG.24928(atpB),MSTRG.2635(ABCB11),MSTRG.30605(ATPA),MSTRG.32198(atpH),MSTRG.6412(DTX44),MSTRG.9475(atpH),Os01g0130000(OsMTP9),Os01g0133400(OsPGLCT),Os01g0173900(OsABCC3),Os01g0209800(OsCAT1),Os01g0225000(-),Os01g0239200(OsTPT1),Os01g0277600(osALA2),Os01g0279700(OsPT21),Os01g0329400(-),Os01g0337500(-),Os01g0342750(-),Os01g0385400(OsSLAC7),Os01g0501700(OsTATC),Os01g0504500(-),O…	MSTRG.1319(OCT2),MSTRG.20157(atpH),MSTRG.3725(NAT12),MSTRG.614(YSL8),MSTRG.7378(DTC),Os01g0232000(OsTIP4),Os01g0264700(-),Os01g0307500(SKC1),Os01g0547600(NRT2.4),Os01g0803300(-),Os01g0817000(-),Os01g0882800(OsAAP11E),Os01g0902700(-),Os02g0211000(OsABCA1),Os02g0301100(OsSWEET4),Os02g0318450(-),Os02g0695800(OsOPT8),Os03g0226400(OsMTP8.1),Os03g0607400(-),Os03g0641200(OsCAT3),Os03g0689300(OSA1),Os03g…
GO:0003674	Molecular Function	GO:0005198	structural molecule activity	112	3	MSTRG.31133(rpl2-A),MSTRG.32225(RPL5),Os01g0100700(RPS5),Os01g0129500(-),Os01g0191100(-),Os01g0276000(-),Os01g0281400(-),Os01g0358400(RPS4),Os01g0723200(OsRPS24),Os01g0746200(NUP85),Os01g0752300(-),Os01g0812800(-),Os01g0823300(OsRPS26),Os02g0102400(-),Os02g0103700(-),Os02g0105900(-),Os02g0198900(OsRPL7/L12),Os02g0229000(-),Os02g0284600(OsRPL27.3),Os02g0287000(RPS3A),Os02g0321900(-),Os02g0478600(R…	Os01g0805900(OsTUB4),Os03g0755700(-),gene-rps18(-)
GO:0003674	Molecular Function	GO:0016209	antioxidant activity	31	16	Os01g0327000(prx14),Os01g0327100(prx15),Os01g0543100(prx17),Os01g0855200(-),Os01g0962700(prx20),Os01g0963000(prx22),Os02g0115700(CATA1),Os02g0192700(Pre),Os02g0753800(ANN2),Os02g0813500(OsGR2),Os03g0358100(OsGpx2),Os03g0729200(-),Os03g0762300(-),Os03g0762400(prx51),Os04g0434800(OsAPx7),Os04g0602100(-),Os04g0651000(prx57),Os04g0688500(prx62),Os05g0162000(prx72),Os05g0323900(SODA1),Os06g0625500(OsP…	Os01g0326100(RP-2),Os01g0326300(-),Os02g0240100(prx30),Os02g0240300(prx29),Os03g0284600(-),Os04g0683850(-),Os06g0306300(prx78),Os06g0547400(prx86),Os07g0676900(prx109),Os07g0677100(POX8.1),Os07g0677200(POX22.3),Os07g0677400(POX5.1),Os07g0677500(POX3006),Os07g0694300(prx116),Os09g0471100(prx122),Os10g0109300(PRX125)
GO:0003674	Molecular Function	GO:0004871	signal transducer activity	61	5	Os01g0253100(-),Os01g0259200(OsRLCK28),Os01g0665200(OsMPK20-4),Os01g0668901(-),Os01g0923700(HK3),Os02g0117500(OsGLR3.1),Os02g0135200(OsMPK13),Os02g0148100(OsMAPK33),Os02g0156000(OsRLCK62),Os02g0629400(-),Os02g0640500(SIT1),Os02g0712700(-),Os03g0232900(-),Os03g0241600(OsRLCK105),Os03g0285800(OsMSRMK2),Os03g0701700(OS-ERS1),Os03g0717000(OsTMK),Os03g0724300(-),Os03g0772600(-),Os04g0109100(OsRLCK125)…	Os01g0743800(OsPHP1),Os03g0226300(OsRLCK104),Os05g0398800(-),Os05g0498900(OsRLCK189),Os05g0589700(OsRLCK191)
GO:0003674	Molecular Function	GO:0031386	protein tag	4	0	Os01g0918200(-),Os02g0161900(rubq2),Os04g0628100(rubi3),Os11g0145400(-)	--
GO:0003674	Molecular Function	GO:0060089	molecular transducer activity	53	4	MSTRG.2738(XI-C),Os01g0253100(-),Os01g0259200(OsRLCK28),Os01g0668901(-),Os01g0923700(HK3),Os02g0117500(OsGLR3.1),Os02g0156000(OsRLCK62),Os02g0629400(-),Os02g0640500(SIT1),Os02g0712700(-),Os03g0232900(-),Os03g0241600(OsRLCK105),Os03g0701700(OS-ERS1),Os03g0717000(OsTMK),Os03g0724300(-),Os03g0772600(-),Os04g0109100(OsRLCK125),Os04g0288500(-),Os04g0435700(-),Os04g0457800(OsSERK2),Os04g0531500(-),Os06…	Os03g0226300(OsRLCK104),Os05g0398800(-),Os05g0498900(OsRLCK189),Os05g0589700(OsRLCK191)
GO:0003674	Molecular Function	GO:0045182	translation regulator activity	1	0	Os01g0143800(-)	--
GO:0003674	Molecular Function	GO:0009055	electron carrier activity	22	7	Os01g0530400(OsGRX5),Os02g0813500(OsGR2),Os03g0429800(-),Os03g0713400(-),Os03g0772800(-),Os03g0790900(AAO3),Os03g0835400(-),Os03g0835900(OsFd3),Os03g0851200(OsGRX11),Os04g0674400(-),Os05g0420600(OsCc1),Os05g0529700(OsDjC50),Os06g0659500(OsGRX18),Os06g0681200(OsENODL18),Os07g0159900(OsGRL14),Os08g0137800(OsUCL24),Os08g0137900(OsUCL25),Os09g0572700(OsUCL33),Os10g0500700(OsGRXS17),gene-cox3(-),gene-…	MSTRG.19036(psbD),Os03g0659266(-),Os04g0473150(-),Os05g0555300(-),Os06g0101600(OsPC),Os12g0538700(OsGRX29),gene-psbA(-)
GO:0003674	Molecular Function	GO:0045735	nutrient reservoir activity	10	0	Os03g0693700(OsOxO1),Os03g0693800(Osoxo4),Os03g0693900(OsOxO3),Os03g0694000(Osoxo4),Os05g0116000(-),Os08g0189500(GLP8-6),Os08g0189600(GLP8-7),Os08g0189700(GLP8-8),Os09g0552600(-),Os10g0400200(Glua2*)	--
GO:0003674	Molecular Function	GO:0005488	binding	2141	238	MSTRG.11084(--),MSTRG.14792(SIT2),MSTRG.17151(GIP),MSTRG.18052(ndhB1),MSTRG.18359(TPS7),MSTRG.18365(TPS7),MSTRG.18399(ALA2),MSTRG.24928(atpB),MSTRG.25008(NRPA1),MSTRG.25943(SIT2),MSTRG.25944(SIT2),MSTRG.25977(SD25),MSTRG.2738(XI-C),MSTRG.27676(CAMTA2),MSTRG.28356(GIP),MSTRG.29911(--),MSTRG.30605(ATPA),MSTRG.31133(rpl2-A),MSTRG.32004(NRPD1),MSTRG.32198(atpH),MSTRG.32225(RPL5),MSTRG.3270(ndhB1),MST…
,Os09g0491756(OsC3H60),Os09g0491788(OsCCR15),Os09g0492700(HMGR),Os09g0493600(-),Os09g0500600(TOP3),Os09g0503400(-),Os09g0505700(-),Os09g0507800(surf-3),Os09g0509000(-),Os09g0511000(OsLysM-RLK10),Os09g0513000(OsBIANK1),Os09g0517100(-),Os09g0517200(-),Os09g0518700(OsITPK6),Os09g0520700(OsRH7),Os09g0521500(-),Os09g0527600(OsRab11F2),Os09g0527900(OsBBX29),Os09g0528200(Oshox6),Os09g0530300(-),Os09g053…	MSTRG.15038(--),MSTRG.19036(psbD),MSTRG.20157(atpH),MSTRG.30707(PBL3),MSTRG.5087(ndhF),MSTRG.8350(--),MSTRG.9497(ndhF),Os01g0117300(OsRLCK17),Os01g0161000(-),Os01g0192000(DOS),Os01g0192900(OsACS5),Os01g0200300(Oshox29),Os01g0200700(OsMT3a),Os01g0227800(-),Os01g0238500(-),Os01g0243100(-),Os01g0274100(OsYUCCA10),Os01g0278000(OsVQ1),Os01g0326100(RP-2),Os01g0326300(-),Os01g0566800(OsbHLH117),Os01g059…
GO:0003674	Molecular Function	GO:0000988	transcription factor activity, protein binding	12	2	Os01g0680400(-),Os01g0920200(-),Os02g0193900(-),Os04g0658100(-),Os05g0107700(xa5),Os05g0588700(-),Os06g0688100(-),Os07g0173400(-),Os08g0163400(OsSIG1),Os08g0480500(OsMed22_2),Os09g0573200(-),Os11g0266800(-)	Os04g0433900(-),Os07g0645200(-)
GO:0003674	Molecular Function	GO:0098772	molecular function regulator	61	7	Os01g0124200(RBBI3-1),Os01g0267300(OsSRP-QKG),Os01g0321700(-),Os01g0377500(CycL1),Os01g0615050(-),Os01g0615100(OCPI2),Os01g0788400(OsPME6),Os01g0803200(Oc1*),Os01g0813900(-),Os01g0976000(-),Os02g0146700(-),Os02g0191700(-),Os02g0327000(OsGAP1),Os02g0761900(-),Os02g0762400(KRP1),Os02g0786000(-),Os02g0805200(OsPCNA),Os03g0246800(-),Os03g0277000(OsGDI3),Os03g0278400(-),Os03g0406200(eEF-1beta2),Os03g0…	MSTRG.545(B'KAPPA),Os01g0123900(RBBI2-2),Os01g0124000(RBBI2-1),Os03g0429000(-),Os07g0556000(CycD6),Os08g0479300(CycD4),Os10g0508700(-)
GO:0003674	Molecular Function	GO:0001071	nucleic acid binding transcription factor activity	111	10	MSTRG.10517(NAC021),Os01g0134700(-),Os01g0165000(DREB2A),Os01g0185900(OsWRKY107),Os01g0191900(R2R3-MYB),Os01g0195000(OsIDD2),Os01g0260700(-),Os01g0289600(OsWRKY9),Os01g0584900(OsWRKY77),Os01g0626400(WRKY11),Os01g0626900(-),Os01g0658900(OsBZ8),Os01g0714800(OsWRKY26),Os01g0734000(OsWRKY23),Os01g0749300(HSFA4A),Os01g0758200(OsDof6),Os01g0808100(OsbZIP08),Os01g0812000(GAMYB),Os01g0826400(OsWRKY24),Os…	Os02g0671300(OsbHLH076),Os02g0695200(OsMYB58/63-L),Os04g0387300(-),Os04g0548700(Oshox17),Os05g0520300(OsGATA1),Os06g0258000(R2R3-MYB),Os06g0601500(OsbZIP48),Os06g0610350(MOC1),Os08g0499300(OsWRKY30),Os09g0522200(OsDREB1A)
GO:0005575	Cellular Component	GO:0044422	organelle part	712	49	MSTRG.13824(--),MSTRG.18052(ndhB1),MSTRG.18399(ALA2),MSTRG.24928(atpB),MSTRG.30605(ATPA),MSTRG.31133(rpl2-A),MSTRG.32004(NRPD1),MSTRG.32198(atpH),MSTRG.32225(RPL5),MSTRG.3270(ndhB1),MSTRG.6412(DTX44),MSTRG.9475(atpH),Os01g0100700(RPS5),Os01g0100900(SPL1),Os01g0102300(OsTLP27),Os01g0103600(-),Os01g0106900(OsDXR),Os01g0118000(-),Os01g0125800(AIP1),Os01g0126100(OsLPR1),Os01g0127300(OsABCI4),Os01g012…	MSTRG.19036(psbD),MSTRG.20157(atpH),MSTRG.5087(ndhF),MSTRG.7378(DTC),MSTRG.9497(ndhF),Os01g0232000(OsTIP4),Os01g0246400(-),Os01g0547600(NRT2.4),Os01g0750300(OsCesA4),Os01g0763700(-),Os01g0805900(OsTUB4),Os01g0882500(-),Os02g0110200(HPL3),Os02g0173900(OsALDH5F1),Os02g0178800(OsGL1-2),Os02g0580400(-),Os02g0675700(-),Os02g0730600(OsSTA74),Os02g0815300(-),Os02g0817900(CYP97A4),Os03g0131900(OscpSRP43)…
GO:0005575	Cellular Component	GO:0016020	membrane	1395	196	MSTRG.11068(CALS8),MSTRG.13824(--),MSTRG.18052(ndhB1),MSTRG.18399(ALA2),MSTRG.24928(atpB),MSTRG.2635(ABCB11),MSTRG.2642(ABCB21),MSTRG.2738(XI-C),MSTRG.30605(ATPA),MSTRG.32198(atpH),MSTRG.3270(ndhB1),MSTRG.6412(DTX44),MSTRG.7572(BAK1),MSTRG.9376(--),MSTRG.9419(ATJ15),MSTRG.9475(atpH),Os01g0100900(SPL1),Os01g0103600(-),Os01g0107900(-),Os01g0120800(eIF-3a),Os01g0121300(-),Os01g0126100(OsLPR1),Os01g0…	MSTRG.19036(psbD),MSTRG.20157(atpH),MSTRG.3725(NAT12),MSTRG.5087(ndhF),MSTRG.614(YSL8),MSTRG.7378(DTC),MSTRG.9497(ndhF),Os01g0117300(OsRLCK17),Os01g0161000(-),Os01g0179800(-),Os01g0227800(-),Os01g0232000(OsTIP4),Os01g0246400(-),Os01g0262500(-),Os01g0307500(SKC1),Os01g0329900(OsGELP14),Os01g0388101(-),Os01g0529800(-),Os01g0547600(NRT2.4),Os01g0607900(OsRPK1),Os01g0627400(OsCYP72A17),Os01g0666600(-…
GO:0005575	Cellular Component	GO:0044464	cell part	2231	229	MSTRG.11068(CALS8),MSTRG.12170(--),MSTRG.13824(--),MSTRG.14101(TY3B-I),MSTRG.14792(SIT2),MSTRG.16908(TIC214),MSTRG.17740(Rv2228c),MSTRG.18052(ndhB1),MSTRG.18399(ALA2),MSTRG.19587(Rv2228c),MSTRG.23349(TY3B-G),MSTRG.24100(Rv2228c),MSTRG.24228(--),MSTRG.24928(atpB),MSTRG.25008(NRPA1),MSTRG.25943(SIT2),MSTRG.25944(SIT2),MSTRG.2642(ABCB21),MSTRG.26888(GIP),MSTRG.26982(RE1),MSTRG.26986(TY3B-I),MSTRG.27…
(OsRLCK259),Os09g0127800(OsWD40-165),Os09g0133200(-),Os09g0133600(-),Os09g0135700(OsPFA-DSP1),Os09g0244900(-),Os09g0246200(OsRpoTm),Os09g0252700(-),Os09g0252800(-),Os09g0258500(-),Os09g0258600(rpl22),Os09g0283600(-),Os09g0286400(OsNHX5),Os09g0297400(OsPPT1),Os09g0298100(OsPFPA4),Os09g0306700(PFT1),Os09g0306800(OsEMF2b),Os09g0309200(-),Os09g0314333(-),Os09g0315700(Osppc2b),Os09g0322000(-),Os09g032…	MSTRG.11417(--),MSTRG.17045(--),MSTRG.17868(--),MSTRG.19036(psbD),MSTRG.20157(atpH),MSTRG.20485(TY3B-I),MSTRG.23499(--),MSTRG.25074(--),MSTRG.29047(--),MSTRG.3725(NAT12),MSTRG.4318(Rv2228c),MSTRG.5087(ndhF),MSTRG.545(B'KAPPA),MSTRG.7378(DTC),MSTRG.8350(--),MSTRG.918(--),MSTRG.9497(ndhF),Os01g0192000(DOS),Os01g0200300(Oshox29),Os01g0207400(-),Os01g0232000(OsTIP4),Os01g0238500(-),Os01g0246400(-),Os…
GO:0005575	Cellular Component	GO:0005623	cell	2248	231	MSTRG.11068(CALS8),MSTRG.12170(--),MSTRG.13824(--),MSTRG.14101(TY3B-I),MSTRG.14792(SIT2),MSTRG.16908(TIC214),MSTRG.17740(Rv2228c),MSTRG.18052(ndhB1),MSTRG.18399(ALA2),MSTRG.19587(Rv2228c),MSTRG.23349(TY3B-G),MSTRG.24100(Rv2228c),MSTRG.24228(--),MSTRG.24928(atpB),MSTRG.25008(NRPA1),MSTRG.25943(SIT2),MSTRG.25944(SIT2),MSTRG.2642(ABCB21),MSTRG.26888(GIP),MSTRG.26982(RE1),MSTRG.26986(TY3B-I),MSTRG.27…
(OsCYP18-2),Os08g0559600(Dad),Os08g0562200(OsNTL5),Os08g0562300(-),Os08g0566900(-),Os08g0567000(-),Os09g0106700(R2R3-MYB),Os09g0109500(-),Os09g0110300(OsCYL4),Os09g0110400(-),Os09g0115400(OsPABPC1),Os09g0121050(-),Os09g0123300(OsRLCK259),Os09g0127800(OsWD40-165),Os09g0133200(-),Os09g0133600(-),Os09g0135700(OsPFA-DSP1),Os09g0244900(-),Os09g0246200(OsRpoTm),Os09g0252700(-),Os09g0252800(-),Os09g0258…	MSTRG.11417(--),MSTRG.17045(--),MSTRG.17868(--),MSTRG.19036(psbD),MSTRG.20157(atpH),MSTRG.20485(TY3B-I),MSTRG.23499(--),MSTRG.25074(--),MSTRG.29047(--),MSTRG.3725(NAT12),MSTRG.4318(Rv2228c),MSTRG.5087(ndhF),MSTRG.545(B'KAPPA),MSTRG.7378(DTC),MSTRG.8350(--),MSTRG.918(--),MSTRG.9497(ndhF),Os01g0192000(DOS),Os01g0200300(Oshox29),Os01g0200700(OsMT3a),Os01g0207400(-),Os01g0232000(OsTIP4),Os01g0238500(…
GO:0005575	Cellular Component	GO:0044425	membrane part	1146	164	MSTRG.11068(CALS8),MSTRG.18052(ndhB1),MSTRG.18399(ALA2),MSTRG.24928(atpB),MSTRG.2738(XI-C),MSTRG.30605(ATPA),MSTRG.32198(atpH),MSTRG.3270(ndhB1),MSTRG.6412(DTX44),MSTRG.9475(atpH),Os01g0100900(SPL1),Os01g0103600(-),Os01g0120800(eIF-3a),Os01g0121300(-),Os01g0126100(OsLPR1),Os01g0128800(OsNTMC2T3),Os01g0129500(-),Os01g0130000(OsMTP9),Os01g0133400(OsPGLCT),Os01g0136700(-),Os01g0136800(OsWAK2),Os01g0…	MSTRG.19036(psbD),MSTRG.20157(atpH),MSTRG.3725(NAT12),MSTRG.5087(ndhF),MSTRG.7378(DTC),MSTRG.9497(ndhF),Os01g0117300(OsRLCK17),Os01g0161000(-),Os01g0179800(-),Os01g0227800(-),Os01g0232000(OsTIP4),Os01g0262500(-),Os01g0307500(SKC1),Os01g0329900(OsGELP14),Os01g0388101(-),Os01g0529800(-),Os01g0547600(NRT2.4),Os01g0607900(OsRPK1),Os01g0627400(OsCYP72A17),Os01g0666600(-),Os01g0669100(OsLSK1),Os01g0694…
GO:0005575	Cellular Component	GO:0032991	macromolecular complex	560	22	MSTRG.24928(atpB),MSTRG.27733(--),MSTRG.30605(ATPA),MSTRG.31133(rpl2-A),MSTRG.32198(atpH),MSTRG.32225(RPL5),MSTRG.6098(--),MSTRG.7572(BAK1),MSTRG.9475(atpH),Os01g0100700(RPS5),Os01g0120800(eIF-3a),Os01g0129500(-),Os01g0148050(-),Os01g0153100(OsFbox002),Os01g0191100(-),Os01g0191500(-),Os01g0193900(OsALYL1),Os01g0197900(OsRDR3),Os01g0266000(-),Os01g0276000(-),Os01g0281400(-),Os01g0321700(-),Os01g03…	MSTRG.19036(psbD),MSTRG.20157(atpH),MSTRG.545(B'KAPPA),Os01g0763700(-),Os02g0580400(-),Os03g0131900(OscpSRP43),Os03g0659266(-),Os03g0755700(-),Os04g0473150(-),Os04g0492500(-),Os05g0470800(-),Os05g0508900(-),Os05g0537200(OsSTA158),Os06g0167000(-),Os07g0556000(CycD6),Os07g0645200(-),Os08g0230300(Os_F0765),Os08g0479300(CycD4),Os08g0504500(-),Os11g0109950(-),gene-psbF(-),gene-rps18(-)
GO:0005575	Cellular Component	GO:0030054	cell junction	51	8	MSTRG.18399(ALA2),MSTRG.25008(NRPA1),MSTRG.7056(Os05g0567100),Os01g0128400(-),Os01g0235400(-),Os01g0327000(prx14),Os01g0327100(prx15),Os01g0377500(CycL1),Os01g0617500(-),Os01g0864500(OsSDS1),Os01g0911200(-),Os01g0916200(-),Os01g0962700(prx20),Os01g0963000(prx22),Os02g0105500(-),Os02g0274100(AIM1),Os02g0670500(OsRALF-8),Os02g0714600(-),Os02g0823100(OsPIP1),Os03g0218400(OsMST4),Os03g0281500(OsCrRLK…	MSTRG.7378(DTC),Os01g0326100(RP-2),Os01g0326300(-),Os01g0769700(DRUS2),Os05g0317900(OsCrRLK1L2),Os06g0133600(-),Os06g0306300(prx78),Os07g0694300(prx116)
GO:0005575	Cellular Component	GO:0055044	symplast	48	7	Os01g0128400(-),Os01g0235400(-),Os01g0327000(prx14),Os01g0327100(prx15),Os01g0377500(CycL1),Os01g0617500(-),Os01g0864500(OsSDS1),Os01g0911200(-),Os01g0916200(-),Os01g0962700(prx20),Os01g0963000(prx22),Os02g0105500(-),Os02g0274100(AIM1),Os02g0670500(OsRALF-8),Os02g0714600(-),Os02g0823100(OsPIP1),Os03g0218400(OsMST4),Os03g0281500(OsCrRLK1L7),Os03g0333200(DRUS1),Os03g0586800(-),Os03g0715500(OsTVLP1)…	Os01g0326100(RP-2),Os01g0326300(-),Os01g0769700(DRUS2),Os05g0317900(OsCrRLK1L2),Os06g0133600(-),Os06g0306300(prx78),Os07g0694300(prx116)
GO:0005575	Cellular Component	GO:0031012	extracellular matrix	2	0	Os02g0740700(OsMMP1),Os06g0239100(-)	--
GO:0005575	Cellular Component	GO:0005576	extracellular region	102	36	Os01g0124200(RBBI3-1),Os01g0197700(Gn1a),Os01g0208700(PEPC-2),Os01g0267300(OsSRP-QKG),Os01g0327100(prx15),Os01g0382000(OsPR1b),Os01g0543100(prx17),Os01g0624000(-),Os01g0660200(C10728),Os01g0687400(-),Os01g0788400(OsPME6),Os01g0794800(-),Os01g0795000(RSP1),Os01g0795400(Hwi2),Os01g0803200(Oc1*),Os01g0850550(OsLAC7),Os01g0879200(DRR206),Os01g0897200(OsRNS2),Os01g0962700(prx20),Os01g0963000(prx22),Os…	Os01g0123900(RBBI2-2),Os01g0124000(RBBI2-1),Os01g0326300(-),Os01g0823100(OsEXP2),Os01g0860400(-),Os02g0240100(prx30),Os02g0240300(prx29),Os03g0273200(Lac),Os03g0429000(-),Os04g0364800(-),Os05g0384300(-),Os05g0477600(OsEXP4),Os06g0149100(OsGELP75),Os06g0306300(prx78),Os06g0335900(OsXTH15),Os06g0547400(prx86),Os06g0582600(-),Os06g0696600(OsXTH12),Os07g0676900(prx109),Os07g0677100(POX8.1),Os07g06772…
GO:0005575	Cellular Component	GO:0043226	organelle	1562	147	MSTRG.12170(--),MSTRG.13824(--),MSTRG.14101(TY3B-I),MSTRG.14792(SIT2),MSTRG.16908(TIC214),MSTRG.17740(Rv2228c),MSTRG.18052(ndhB1),MSTRG.18399(ALA2),MSTRG.19587(Rv2228c),MSTRG.23349(TY3B-G),MSTRG.24100(Rv2228c),MSTRG.24228(--),MSTRG.24928(atpB),MSTRG.25008(NRPA1),MSTRG.25943(SIT2),MSTRG.25944(SIT2),MSTRG.2642(ABCB21),MSTRG.26888(GIP),MSTRG.26982(RE1),MSTRG.26986(TY3B-I),MSTRG.2738(XI-C),MSTRG.2767…	MSTRG.11417(--),MSTRG.17045(--),MSTRG.17868(--),MSTRG.19036(psbD),MSTRG.20157(atpH),MSTRG.20485(TY3B-I),MSTRG.23499(--),MSTRG.25074(--),MSTRG.29047(--),MSTRG.4318(Rv2228c),MSTRG.5087(ndhF),MSTRG.7378(DTC),MSTRG.8350(--),MSTRG.918(--),MSTRG.9497(ndhF),Os01g0192000(DOS),Os01g0200300(Oshox29),Os01g0207400(-),Os01g0232000(OsTIP4),Os01g0246400(-),Os01g0278000(OsVQ1),Os01g0332800(OsSCP3),Os01g0547600(N…
GO:0005575	Cellular Component	GO:0044421	extracellular region part	18	2	Os01g0197700(Gn1a),Os01g0267300(OsSRP-QKG),Os01g0382000(OsPR1b),Os01g0794800(-),Os01g0795000(RSP1),Os01g0795400(Hwi2),Os02g0469600(-),Os03g0610650(OsSRP-LRS),Os04g0523500(OsCKX8),Os05g0508300(-),Os07g0127500(OsPR1#072),Os07g0127600(OsPR1#073),Os07g0127700(PR1b),Os07g0129300(OsPR1),Os08g0556900(CP),Os09g0442300(-),Os10g0191300(OsPR1#101),Os12g0238100(-)	Os06g0582600(-),Os09g0564000(-)
GO:0005575	Cellular Component	GO:0031974	membrane-enclosed lumen	157	4	MSTRG.32004(NRPD1),Os01g0143800(-),Os01g0191500(-),Os01g0193900(OsALYL1),Os01g0511200(-),Os01g0530400(OsGRX5),Os01g0547200(-),Os01g0560000(-),Os01g0614500(-),Os01g0655400(-),Os01g0679000(-),Os01g0680400(-),Os01g0739000(-),Os01g0775100(-),Os01g0810000(-),Os01g0868300(OSPOLA),Os01g0909500(-),Os01g0920200(-),Os01g0925700(-),Os01g0945800(HNR27C),Os01g0958900(OsMLH1),Os01g0966300(-),Os02g0100100(PDIL1…	Os02g0173900(OsALDH5F1),Os03g0203100(-),Os07g0645200(-),Os10g0503200(-)
GO:0005575	Cellular Component	GO:0009295	nucleoid	4	0	Os03g0602600(HSA1),Os03g0633900(-),Os03g0824100(OspTAC2),Os05g0393400(-)	--
GO:0005575	Cellular Component	GO:0099512	supramolecular fiber	12	1	Os01g0125800(AIP1),Os02g0274100(AIM1),Os03g0200200(-),Os04g0501700(-),Os04g0666900(OsKCBP),Os05g0154500(-),Os05g0154700(SRS3),Os05g0156600(-),Os07g0512200(Atg8),Os07g0574800(OsTubA1),Os09g0446200(-),Os11g0247300(TID1)	Os01g0805900(OsTUB4)

## Sheet:  zj-esa-vs-zj-esb
All enrichment GO terms of mRNAs of the comparison between zj-esa and zj-esb.
GO ID (level1)	GO Term (level1)	GO ID (level2)	GO Term (level2)	number_of_Pir1a-vs-Pir1b (up)	number_of_Pir1a-vs-Pir1b (down)	Genes_of_Pir1a-vs-Pir1b_up	Genes_of_Pir1a-vs-Pir1b_down
GO:0008150	Biological Process	GO:0044699	single-organism process	1095	311	MSTRG.10517(NAC021),MSTRG.13824(--),MSTRG.15490(SCAB1),MSTRG.18399(ALA2),MSTRG.19312(BGLU15),MSTRG.24743(KIN14M),MSTRG.25968(JUB1),MSTRG.28425(--),MSTRG.30597(COX1),MSTRG.30599(RPL5),MSTRG.30605(ATPA),MSTRG.31000(TPS9),MSTRG.31615(CCR1),MSTRG.32225(RPL5),MSTRG.32226(NAD9),MSTRG.32231(CALS7),MSTRG.3364(CYP94B1),MSTRG.4652(MIK2),MSTRG.4776(KCS1),MSTRG.5895(ecdK),MSTRG.6412(DTX44),MSTRG.6848(--),MST…	MSTRG.11456(ndhH),MSTRG.1319(OCT2),MSTRG.15723(--),MSTRG.24751(ADT3),MSTRG.24903(ALDH2C4),MSTRG.5087(ndhF),MSTRG.7378(DTC),MSTRG.9497(ndhF),Os01g0103100(-),Os01g0110100(Pho1),Os01g0126200(OsLPR2),Os01g0134500(OsSTE1),Os01g0171000(OsSERL5),Os01g0177900(PDR6),Os01g0178400(-),Os01g0192000(DOS),Os01g0202500(OsBBX1),Os01g0238500(-),Os01g0264700(-),Os01g0273800(OsYUCCA9),Os01g0282800(OsTUB1),Os01g02947…
GO:0008150	Biological Process	GO:0051704	multi-organism process	75	33	MSTRG.25968(JUB1),MSTRG.4664(PUB21),Os01g0580100(-),Os01g0642700(-),Os01g0670100(-),Os01g0853400(OsCOI1a),Os01g0884300(OsNAC6),Os01g0885700(-),Os01g0923700(HK3),Os01g0960500(-),Os02g0115700(CATA1),Os02g0234300(OsPUB4),Os02g0327000(OsGAP1),Os02g0503900(-),Os02g0621500(-),Os02g0640500(SIT1),Os02g0712700(-),Os03g0146400(OsPAO),Os03g0170900(OsSUT1),Os03g0229500(-),Os03g0266300(Oshsp17.9A),Os03g064330…	MSTRG.24903(ALDH2C4),Os01g0130200(-),Os01g0668600(-),Os01g0669100(OsLSK1),Os01g0750300(OsCesA4),Os01g0784700(-),Os01g0889900(-),Os02g0121700(OsTPS3),Os02g0527100(-),Os02g0712600(-),Os03g0221700(-),Os03g0738600(LOX-L2),Os03g0772700(-),Os04g0401000(PI21),Os04g0618700(Os-FLS2),Os05g0165900(-),Os05g0166300(-),Os06g0164900(-),Os07g0133000(-),Os07g0290200(OsLTPd4),Os07g0694300(prx116),Os08g0124000(-),O…
GO:0008150	Biological Process	GO:0051179	localization	357	80	MSTRG.13824(--),MSTRG.18399(ALA2),MSTRG.21297(SFH6),MSTRG.30597(COX1),MSTRG.30605(ATPA),MSTRG.32226(NAD9),MSTRG.7056(Os05g0567100),MSTRG.9376(--),Os01g0130000(OsMTP9),Os01g0133400(OsPGLCT),Os01g0175700(BOR2),Os01g0179400(SSG4),Os01g0227300(OsRab7B1),Os01g0231500(-),Os01g0242600(OsNTMC2T6.1),Os01g0251000(-),Os01g0254000(OsARL1d),Os01g0254900(-),Os01g0268100(OsZIFL1),Os01g0297700(OsUMAMIT5),Os01g03…	MSTRG.11456(ndhH),MSTRG.24903(ALDH2C4),MSTRG.5087(ndhF),MSTRG.7378(DTC),MSTRG.9497(ndhF),Os01g0103100(-),Os01g0110100(Pho1),Os01g0177900(PDR6),Os01g0264700(-),Os01g0547600(NRT2.4),Os01g0704100(NRT2.3),Os01g0850700(OsLAC8),Os01g0856500(OsLAX1),Os01g0857500(-),Os01g0882800(OsAAP11E),Os01g0902100(OsABCC2),Os01g0902700(-),Os01g0905200(OsEXO70FX15),Os01g0952100(OsGLP1-5),Os01g0966500(-),Os02g0102200(O…
GO:0008150	Biological Process	GO:0050896	response to stimulus	386	138	MSTRG.10517(NAC021),MSTRG.1359(ATJ15),MSTRG.24228(--),MSTRG.25968(JUB1),MSTRG.30605(ATPA),MSTRG.31000(TPS9),MSTRG.4652(MIK2),MSTRG.4664(PUB21),MSTRG.6848(--),MSTRG.7056(Os05g0567100),MSTRG.7894(PDC1),Os01g0118000(-),Os01g0141600(OsRUS5),Os01g0182600(GI),Os01g0187900(-),Os01g0206700(OsCIPK05),Os01g0227300(OsRab7B1),Os01g0266600(OsPrxII),Os01g0270100(-),Os01g0279300(OsCaM3),Os01g0279900(OsbZIP03),O…	MSTRG.15723(--),MSTRG.24751(ADT3),MSTRG.24903(ALDH2C4),MSTRG.7378(DTC),Os01g0110100(Pho1),Os01g0130200(-),Os01g0171000(OsSERL5),Os01g0178400(-),Os01g0192000(DOS),Os01g0202500(OsBBX1),Os01g0225600(Lea14A),Os01g0294700(OsPOD),Os01g0311500(OsPHS1a),Os01g0326100(RP-2),Os01g0326300(-),Os01g0544450(OsMCM4),Os01g0547600(NRT2.4),Os01g0639900(BETACA1),Os01g0704100(NRT2.3),Os01g0720500(Lhcb1.1),Os01g074380…
GO:0008150	Biological Process	GO:0098754	detoxification	21	25	Os01g0266600(OsPrxII),Os01g0327100(prx15),Os02g0115700(CATA1),Os02g0635200(NIT1),Os02g0646400(OsGRX10),Os02g0664000(OsGpx3),Os02g0813500(OsGR2),Os03g0358100(OsGpx2),Os03g0762300(-),Os03g0762400(prx51),Os04g0206600(UDP-GT),Os04g0434800(OsAPx7),Os04g0556000(HMA5),Os04g0556300(OsGpx1),Os04g0688500(prx62),Os05g0323900(SODA1),Os06g0115400(OsFSD1.1),Os06g0274800(prx77),Os06g0727200(CATB),Os08g0453700(R…	Os01g0294700(OsPOD),Os01g0326100(RP-2),Os01g0326300(-),Os01g0835500(rbohE),Os02g0129800(-),Os02g0236800(prx26),Os02g0240100(prx30),Os02g0240300(prx29),Os04g0688200(prx60),Os04g0688300(prx61),Os05g0499400(prx75),Os06g0306300(prx78),Os06g0521500(prx83),Os06g0522300(prx81),Os06g0547400(prx86),Os06g0695300(prx92),Os07g0115300(prx98),Os07g0676900(prx109),Os07g0677100(POX8.1),Os07g0677200(POX22.3),Os07…
GO:0008150	Biological Process	GO:0023052	signaling	136	46	MSTRG.10517(NAC021),MSTRG.4652(MIK2),MSTRG.6848(--),Os01g0206700(OsCIPK05),Os01g0227300(OsRab7B1),Os01g0279300(OsCaM3),Os01g0286100(PIL15),Os01g0292200(OsCIPK01),Os01g0310800(OsWAK4),Os01g0505600(OsCML11),Os01g0622600(OsCDPK1),Os01g0643800(-),Os01g0689900(OsWAK10),Os01g0783200(-),Os01g0853400(OsCOI1a),Os01g0923700(HK3),Os01g0952800(OsIRO2),Os01g0960500(-),Os02g0111600(OsWAK11),Os02g0135200(OsMPK1…	MSTRG.15723(--),Os01g0171000(OsSERL5),Os01g0178400(-),Os01g0192000(DOS),Os01g0743800(OsPHP1),Os01g0856500(OsLAX1),Os02g0110600(-),Os02g0322400(-),Os02g0628600(OsARF8),Os02g0633066(OsWAK16),Os02g0723400(OsIAA8),Os03g0228800(-),Os03g0232600(ELF1),Os03g0292700(-),Os03g0297600(OsPYL/RCAR4),Os03g0742900(OsIAA13),Os03g0772700(-),Os03g0773700(OsRLCK117),Os04g0366000(-),Os04g0442000(OsARF9),Os04g0517500(…
GO:0008150	Biological Process	GO:0048511	rhythmic process	5	1	Os01g0182600(GI),Os02g0115700(CATA1),Os06g0727200(CATB),Os10g0498700(OsMed16_1),Os11g0547000(FKF1)	Os05g0291700(-)
GO:0008150	Biological Process	GO:0040011	locomotion	4	0	Os01g0580100(-),Os02g0742200(OsRac3),Os06g0234200(OsRAC4),Os08g0544500(LPL3)	--
GO:0008150	Biological Process	GO:0002376	immune system process	12	4	MSTRG.25968(JUB1),MSTRG.6848(--),Os01g0958700(-),Os02g0234300(OsPUB4),Os02g0327000(OsGAP1),Os02g0629400(-),Os03g0146400(OsPAO),Os03g0270000(-),Os03g0643300(OsOAT),Os04g0379600(-),Os04g0509300(DCL4),Os10g0498700(OsMed16_1)	MSTRG.24903(ALDH2C4),Os01g0130200(-),Os05g0333200(D1),Os07g0290200(OsLTPd4)
GO:0008150	Biological Process	GO:0040007	growth	14	5	Os01g0883800(20ox2),Os01g0884300(OsNAC6),Os01g0923700(HK3),Os02g0204700(OsCYP734A2),Os03g0390700(-),Os06g0600400(OsCYP734A4),Os07g0563800(-),Os07g0597200(-),Os07g0675000(-),Os08g0104100(-),Os08g0191000(OsPILS2),Os08g0425700(OsANN7),Os08g0544500(LPL3),Os09g0133200(-)	Os03g0418700(-),Os03g0856700(GA20OX1),Os05g0333200(D1),Os05g0421900(GA20OX4),Os08g0113700(-)
GO:0008150	Biological Process	GO:0008152	metabolic process	1268	384	MSTRG.10517(NAC021),MSTRG.14760(--),MSTRG.15458(--),MSTRG.19312(BGLU15),MSTRG.19587(Rv2228c),MSTRG.24063(--),MSTRG.24064(--),MSTRG.24100(Rv2228c),MSTRG.24228(--),MSTRG.25943(SIT2),MSTRG.25968(JUB1),MSTRG.25977(SD25),MSTRG.28361(--),MSTRG.28425(--),MSTRG.28771(--),MSTRG.30299(--),MSTRG.30597(COX1),MSTRG.30599(RPL5),MSTRG.30605(ATPA),MSTRG.30781(TY3B-I),MSTRG.30893(At2g28960),MSTRG.31000(TPS9),MSTR…	MSTRG.11417(--),MSTRG.11456(ndhH),MSTRG.15723(--),MSTRG.18783(--),MSTRG.21456(rpoA),MSTRG.24751(ADT3),MSTRG.24903(ALDH2C4),MSTRG.25061(LYK5),MSTRG.27946(Os04g0179200),MSTRG.29101(--),MSTRG.30905(At1g05700),MSTRG.4318(Rv2228c),MSTRG.4912(--),MSTRG.5051(--),MSTRG.5087(ndhF),MSTRG.6869(TY3B-I),MSTRG.7378(DTC),MSTRG.9497(ndhF),Os01g0111100(OsCYP26-2),Os01g0113300(OsRLCK3),Os01g0113500(-),Os01g0117700…
GO:0008150	Biological Process	GO:0022414	reproductive process	54	26	MSTRG.10517(NAC021),Os01g0169500(-),Os01g0182600(GI),Os01g0390300(-),Os01g0580100(-),Os01g0642700(-),Os01g0667200(GLYII-1),Os01g0670100(-),Os01g0871300(-),Os01g0883800(20ox2),Os01g0885700(-),Os01g0923700(HK3),Os02g0274100(AIM1),Os02g0649900(YSL2),Os03g0146400(OsPAO),Os03g0170900(OsSUT1),Os03g0307800(IEZ1),Os03g0762000(HD6),Os03g0800200(MEL1),Os04g0103500(YK28),Os04g0509300(DCL4),Os04g0542200(OsYS…	Os01g0668600(-),Os01g0669100(OsLSK1),Os01g0784700(-),Os01g0889900(-),Os02g0642600(-),Os03g0100020(OsTET4),Os03g0221700(-),Os03g0727600(ACS1),Os03g0856700(GA20OX1),Os04g0653000(EG2),Os05g0165900(-),Os05g0166300(-),Os05g0421900(GA20OX4),Os06g0164900(-),Os07g0517300(-),Os07g0568700(FOR1),Os07g0605200(MADS18),Os07g0616200(-),Os07g0659500(-),Os09g0451400(ACO2),Os10g0493600(alphaGa1),Os10g0555600(OsEXP…
GO:0008150	Biological Process	GO:0000003	reproduction	54	26	MSTRG.10517(NAC021),Os01g0169500(-),Os01g0182600(GI),Os01g0390300(-),Os01g0580100(-),Os01g0642700(-),Os01g0667200(GLYII-1),Os01g0670100(-),Os01g0871300(-),Os01g0883800(20ox2),Os01g0885700(-),Os01g0923700(HK3),Os02g0274100(AIM1),Os02g0649900(YSL2),Os03g0146400(OsPAO),Os03g0170900(OsSUT1),Os03g0307800(IEZ1),Os03g0762000(HD6),Os03g0800200(MEL1),Os04g0103500(YK28),Os04g0509300(DCL4),Os04g0542200(OsYS…	Os01g0668600(-),Os01g0669100(OsLSK1),Os01g0784700(-),Os01g0889900(-),Os02g0642600(-),Os03g0100020(OsTET4),Os03g0221700(-),Os03g0727600(ACS1),Os03g0856700(GA20OX1),Os04g0653000(EG2),Os05g0165900(-),Os05g0166300(-),Os05g0421900(GA20OX4),Os06g0164900(-),Os07g0517300(-),Os07g0568700(FOR1),Os07g0605200(MADS18),Os07g0616200(-),Os07g0659500(-),Os09g0451400(ACO2),Os10g0493600(alphaGa1),Os10g0555600(OsEXP…
GO:0008150	Biological Process	GO:0032501	multicellular organismal process	84	34	MSTRG.10517(NAC021),MSTRG.25968(JUB1),MSTRG.32231(CALS7),MSTRG.9376(--),Os01g0169500(-),Os01g0182600(GI),Os01g0580100(-),Os01g0642700(-),Os01g0667200(GLYII-1),Os01g0670100(-),Os01g0862300(-),Os01g0871300(-),Os01g0883800(20ox2),Os01g0884300(OsNAC6),Os01g0885700(-),Os01g0893400(-),Os01g0923700(HK3),Os02g0274100(AIM1),Os02g0293400(SIP14),Os02g0435000(OsNSCC2),Os02g0649900(YSL2),Os02g0664000(OsGpx3),…	Os01g0192000(DOS),Os01g0202500(OsBBX1),Os01g0544450(OsMCM4),Os01g0668600(-),Os01g0669100(OsLSK1),Os01g0784700(-),Os01g0889900(-),Os01g0952100(OsGLP1-5),Os02g0606200(OsBBX4),Os02g0646200(OsBBX6),Os02g0697400(4CL2),Os02g0756100(-),Os03g0100020(OsTET4),Os03g0221700(-),Os03g0727600(ACS1),Os03g0856700(GA20OX1),Os04g0540200(OsBBX13),Os04g0653000(EG2),Os05g0101600(-),Os05g0165900(-),Os05g0166300(-),Os05…
GO:0008150	Biological Process	GO:0048518	positive regulation of biological process	78	17	Os01g0125800(AIP1),Os01g0165000(DREB2A),Os01g0169500(-),Os01g0230200(OsbHLH074),Os01g0254000(OsARL1d),Os01g0668300(-),Os01g0884300(OsNAC6),Os01g0923600(CAMTA),Os01g0925700(-),Os01g0952800(OsIRO2),Os01g0954500(-),Os02g0105100(-),Os02g0134300(OsTEF1),Os02g0230100(-),Os02g0232000(HSFC2A),Os02g0235000(-),Os02g0272600(-),Os02g0327000(OsGAP1),Os02g0527300(HSFA3),Os02g0649300(HOX24),Os02g0666300(YDA2),O…	Os01g0808900(OsVQ4),Os02g0322400(-),Os02g0671300(OsbHLH076),Os03g0251800(-),Os03g0292700(-),Os03g0323500(-),Os03g0797600(OsbHLH098),Os05g0333200(D1),Os05g0390800(OsVQ19),Os05g0491700(OsVQ20),Os07g0517300(-),Os07g0556000(CycD6),Os07g0605200(MADS18),Os08g0113700(-),Os08g0481400(Oshox20),Os10g0493600(alphaGa1),Os10g0536100(OsMADS56)
GO:0008150	Biological Process	GO:0048519	negative regulation of biological process	63	24	MSTRG.15458(--),MSTRG.19587(Rv2228c),MSTRG.24063(--),MSTRG.24064(--),MSTRG.24100(Rv2228c),MSTRG.25968(JUB1),MSTRG.28361(--),MSTRG.30299(--),MSTRG.30781(TY3B-I),Os01g0124200(RBBI3-1),Os01g0169500(-),Os01g0270100(-),Os01g0286100(PIL15),Os01g0615100(OCPI2),Os01g0664500(-),Os01g0668300(-),Os01g0788400(OsPME6),Os01g0803200(Oc1*),Os01g0923700(HK3),Os02g0125300(OsBI-1),Os02g0169400(OsAGO17),Os02g0640500…	MSTRG.11417(--),MSTRG.18783(--),MSTRG.29101(--),MSTRG.4318(Rv2228c),MSTRG.4912(--),MSTRG.5051(--),MSTRG.6869(TY3B-I),Os01g0123900(RBBI2-2),Os01g0124000(RBBI2-1),Os01g0127600(-),Os01g0856000(OsCDC6),Os01g0966500(-),Os03g0297600(OsPYL/RCAR4),Os03g0429000(-),Os03g0755700(-),Os03g0856500(-),Os04g0577700(OsOFP11),Os05g0361500(OsPME17),Os05g0473000(OsPYL/RCAR6),Os05g0517100(OsOFP25),Os05g0579800(APC10)…
GO:0008150	Biological Process	GO:0009987	cellular process	1337	386	MSTRG.10517(NAC021),MSTRG.14760(--),MSTRG.15458(--),MSTRG.15490(SCAB1),MSTRG.19312(BGLU15),MSTRG.19587(Rv2228c),MSTRG.24063(--),MSTRG.24064(--),MSTRG.24100(Rv2228c),MSTRG.24228(--),MSTRG.24743(KIN14M),MSTRG.25943(SIT2),MSTRG.25968(JUB1),MSTRG.25977(SD25),MSTRG.28361(--),MSTRG.28771(--),MSTRG.30299(--),MSTRG.30597(COX1),MSTRG.30599(RPL5),MSTRG.30605(ATPA),MSTRG.30781(TY3B-I),MSTRG.30893(At2g28960)…	MSTRG.11417(--),MSTRG.11456(ndhH),MSTRG.1319(OCT2),MSTRG.15723(--),MSTRG.18783(--),MSTRG.21456(rpoA),MSTRG.24751(ADT3),MSTRG.24903(ALDH2C4),MSTRG.25061(LYK5),MSTRG.29101(--),MSTRG.30905(At1g05700),MSTRG.4318(Rv2228c),MSTRG.4912(--),MSTRG.5051(--),MSTRG.5087(ndhF),MSTRG.6869(TY3B-I),MSTRG.7378(DTC),MSTRG.9497(ndhF),Os01g0103100(-),Os01g0110100(Pho1),Os01g0111100(OsCYP26-2),Os01g0113300(OsRLCK3),Os…
GO:0008150	Biological Process	GO:0032502	developmental process	80	31	MSTRG.10517(NAC021),MSTRG.25968(JUB1),MSTRG.32231(CALS7),MSTRG.9376(--),Os01g0141600(OsRUS5),Os01g0169500(-),Os01g0182600(GI),Os01g0580100(-),Os01g0667200(GLYII-1),Os01g0668000(-),Os01g0862300(-),Os01g0871300(-),Os01g0883800(20ox2),Os01g0884300(OsNAC6),Os01g0893400(-),Os01g0923700(HK3),Os02g0194800(-),Os02g0274100(AIM1),Os02g0293400(SIP14),Os02g0435000(OsNSCC2),Os02g0641300(R2R3-MYB),Os02g0649900…	Os01g0192000(DOS),Os01g0202500(OsBBX1),Os01g0544450(OsMCM4),Os01g0952100(OsGLP1-5),Os02g0110600(-),Os02g0606200(OsBBX4),Os02g0646200(OsBBX6),Os02g0695200(OsMYB58/63-L),Os02g0697400(4CL2),Os02g0756100(-),Os03g0100020(OsTET4),Os03g0418700(-),Os03g0727600(ACS1),Os03g0856700(GA20OX1),Os04g0540200(OsBBX13),Os04g0653000(EG2),Os05g0101600(-),Os05g0333200(D1),Os05g0421900(GA20OX4),Os05g0579800(APC10),Os0…
GO:0008150	Biological Process	GO:0065007	biological regulation	426	128	MSTRG.10517(NAC021),MSTRG.14760(--),MSTRG.15458(--),MSTRG.15490(SCAB1),MSTRG.19587(Rv2228c),MSTRG.24063(--),MSTRG.24064(--),MSTRG.24100(Rv2228c),MSTRG.25968(JUB1),MSTRG.28361(--),MSTRG.30299(--),MSTRG.30781(TY3B-I),MSTRG.32231(CALS7),MSTRG.4652(MIK2),MSTRG.6848(--),Os01g0120400(-),Os01g0124200(RBBI3-1),Os01g0125800(AIP1),Os01g0128000(-),Os01g0130000(OsMTP9),Os01g0159800(OsbHLH035),Os01g0165000(DR…	MSTRG.11417(--),MSTRG.15723(--),MSTRG.18783(--),MSTRG.29101(--),MSTRG.4318(Rv2228c),MSTRG.4912(--),MSTRG.5051(--),MSTRG.6869(TY3B-I),Os01g0123900(RBBI2-2),Os01g0124000(RBBI2-1),Os01g0127600(-),Os01g0130200(-),Os01g0171000(OsSERL5),Os01g0178400(-),Os01g0192000(DOS),Os01g0202500(OsBBX1),Os01g0566800(OsbHLH117),Os01g0639900(BETACA1),Os01g0743800(OsPHP1),Os01g0808900(OsVQ4),Os01g0850700(OsLAC8),Os01g…
GO:0008150	Biological Process	GO:0050789	regulation of biological process	366	116	MSTRG.10517(NAC021),MSTRG.14760(--),MSTRG.15458(--),MSTRG.15490(SCAB1),MSTRG.19587(Rv2228c),MSTRG.24063(--),MSTRG.24064(--),MSTRG.24100(Rv2228c),MSTRG.25968(JUB1),MSTRG.28361(--),MSTRG.30299(--),MSTRG.30781(TY3B-I),MSTRG.32231(CALS7),MSTRG.4652(MIK2),MSTRG.6848(--),Os01g0120400(-),Os01g0124200(RBBI3-1),Os01g0125800(AIP1),Os01g0128000(-),Os01g0159800(OsbHLH035),Os01g0165000(DREB2A),Os01g0169500(-)…	MSTRG.11417(--),MSTRG.15723(--),MSTRG.18783(--),MSTRG.29101(--),MSTRG.4318(Rv2228c),MSTRG.4912(--),MSTRG.5051(--),MSTRG.6869(TY3B-I),Os01g0123900(RBBI2-2),Os01g0124000(RBBI2-1),Os01g0127600(-),Os01g0130200(-),Os01g0171000(OsSERL5),Os01g0178400(-),Os01g0192000(DOS),Os01g0202500(OsBBX1),Os01g0566800(OsbHLH117),Os01g0639900(BETACA1),Os01g0743800(OsPHP1),Os01g0808900(OsVQ4),Os01g0856000(OsCDC6),Os01g…
GO:0008150	Biological Process	GO:0071840	cellular component organization or biogenesis	177	45	MSTRG.32231(CALS7),Os01g0102600(OsSK4),Os01g0125800(AIP1),Os01g0179400(SSG4),Os01g0254000(OsARL1d),Os01g0254900(-),Os01g0355500(OsDjC5),Os01g0390300(-),Os01g0505600(OsCML11),Os01g0584200(-),Os01g0668300(-),Os01g0673800(Os),Os01g0772800(-),Os01g0773100(-),Os01g0788400(OsPME6),Os01g0834200(-),Os01g0865100(-),Os01g0883800(20ox2),Os01g0892600(-),Os01g0893400(-),Os01g0898300(OsSPR1),Os01g0920400(OsDRP…	Os01g0282800(OsTUB1),Os01g0311500(OsPHS1a),Os01g0544450(OsMCM4),Os01g0750300(OsCesA4),Os01g0763700(-),Os01g0823100(OsEXP2),Os01g0880200(-),Os01g0892500(-),Os02g0642600(-),Os02g0697400(4CL2),Os02g0702400(-),Os02g0797400(OsMCM5),Os03g0105600(OsTUB2),Os03g0209500(-),Os03g0370500(-),Os03g0418700(-),Os03g0786500(-),Os03g0822300(-),Os03g0856700(GA20OX1),Os04g0369000(OsRLCK144),Os04g0618700(Os-FLS2),Os0…
GO:0003674	Molecular Function	GO:0003824	catalytic activity	1185	360	MSTRG.18365(TPS7),MSTRG.18399(ALA2),MSTRG.19312(BGLU15),MSTRG.24743(KIN14M),MSTRG.25943(SIT2),MSTRG.25977(SD25),MSTRG.28425(--),MSTRG.30597(COX1),MSTRG.30605(ATPA),MSTRG.30893(At2g28960),MSTRG.31000(TPS9),MSTRG.31615(CCR1),MSTRG.32226(NAD9),MSTRG.32231(CALS7),MSTRG.3364(CYP94B1),MSTRG.4386(CYP94A2),MSTRG.4652(MIK2),MSTRG.4776(KCS1),MSTRG.5003(UGT83A1),MSTRG.5895(ecdK),MSTRG.6848(--),MSTRG.7056(Os…	MSTRG.11456(ndhH),MSTRG.15723(--),MSTRG.17710(LECRK43),MSTRG.18359(TPS7),MSTRG.21456(rpoA),MSTRG.24751(ADT3),MSTRG.24903(ALDH2C4),MSTRG.25061(LYK5),MSTRG.27115(HIDM),MSTRG.27946(Os04g0179200),MSTRG.30905(At1g05700),MSTRG.5087(ndhF),MSTRG.9497(ndhF),Os01g0111100(OsCYP26-2),Os01g0113300(OsRLCK3),Os01g0113500(-),Os01g0117700(-),Os01g0118400(-),Os01g0126200(OsLPR2),Os01g0130400(-),Os01g0134500(OsSTE1…
GO:0003674	Molecular Function	GO:0005215	transporter activity	202	60	MSTRG.18399(ALA2),MSTRG.21297(SFH6),MSTRG.30605(ATPA),MSTRG.6412(DTX44),Os01g0130000(OsMTP9),Os01g0133400(OsPGLCT),Os01g0175700(BOR2),Os01g0266800(-),Os01g0297700(OsUMAMIT5),Os01g0356400(OsABCC8),Os01g0385400(OsSLAC7),Os01g0504500(-),Os01g0532600(OsHKT3),Os01g0557500(OsCAX1a),Os01g0571000(-),Os01g0606000(OsSWEET6a),Os01g0607200(OsBAT1),Os01g0623200(SLAC),Os01g0645900(OsSultr5),Os01g0648000(OsAKT1…	MSTRG.1319(OCT2),MSTRG.7378(DTC),Os01g0103100(-),Os01g0110100(Pho1),Os01g0177900(PDR6),Os01g0264700(-),Os01g0547600(NRT2.4),Os01g0704100(NRT2.3),Os01g0856500(OsLAX1),Os01g0857500(-),Os01g0882800(OsAAP11E),Os01g0902100(OsABCC2),Os01g0902700(-),Os02g0102200(OsAAP7C),Os02g0211000(OsABCA1),Os02g0318450(-),Os02g0550800(OsAMT3),Os02g0689900(OsNRT1.5A),Os02g0695800(OsOPT8),Os02g0695900(-),Os03g0103000(O…
GO:0003674	Molecular Function	GO:0016209	antioxidant activity	22	24	Os01g0266600(OsPrxII),Os01g0327100(prx15),Os01g0855200(-),Os02g0115700(CATA1),Os02g0646400(OsGRX10),Os02g0664000(OsGpx3),Os02g0753800(ANN2),Os02g0813500(OsGR2),Os03g0358100(OsGpx2),Os03g0762300(-),Os03g0762400(prx51),Os04g0434800(OsAPx7),Os04g0556300(OsGpx1),Os04g0688500(prx62),Os05g0323900(SODA1),Os06g0115400(OsFSD1.1),Os06g0221200(OsANN5),Os06g0274800(prx77),Os06g0727200(CATB),Os07g0665200(Cu/Z…	Os01g0294700(OsPOD),Os01g0326100(RP-2),Os01g0326300(-),Os01g0835500(rbohE),Os02g0236800(prx26),Os02g0240100(prx30),Os02g0240300(prx29),Os04g0688200(prx60),Os04g0688300(prx61),Os05g0499400(prx75),Os06g0306300(prx78),Os06g0521500(prx83),Os06g0522300(prx81),Os06g0547400(prx86),Os06g0695300(prx92),Os07g0115300(prx98),Os07g0676900(prx109),Os07g0677100(POX8.1),Os07g0677200(POX22.3),Os07g0677400(POX5.1)…
GO:0003674	Molecular Function	GO:0004871	signal transducer activity	39	19	Os01g0310800(OsWAK4),Os01g0643800(-),Os01g0923700(HK3),Os02g0117500(OsGLR3.1),Os02g0135200(OsMPK13),Os02g0148100(OsMAPK33),Os02g0629400(-),Os02g0640500(SIT1),Os02g0712700(-),Os03g0232900(-),Os03g0241600(OsRLCK105),Os03g0309200(PHYB),Os03g0717000(OsTMK),Os03g0719800(PHYA),Os03g0724300(-),Os04g0109100(OsRLCK125),Os04g0109400(-),Os04g0288500(-),Os06g0210400(-),Os06g0367900(OsMPK20-3),Os06g0660800(-)…	Os01g0171000(OsSERL5),Os01g0743800(OsPHP1),Os02g0110600(-),Os02g0712600(-),Os03g0297600(OsPYL/RCAR4),Os03g0772700(-),Os05g0398800(-),Os05g0473000(OsPYL/RCAR6),Os07g0133000(-),Os08g0124000(-),Os08g0124100(-),Os08g0124500(-),Os08g0124700(-),Os08g0138700(OsRLCK245),Os09g0268000(-),Os09g0339000(-),Os10g0389800(-),Os10g0516200(OsRLCK303),Os12g0574700(-)
GO:0003674	Molecular Function	GO:0060089	molecular transducer activity	35	18	Os01g0310800(OsWAK4),Os01g0923700(HK3),Os02g0117500(OsGLR3.1),Os02g0629400(-),Os02g0640500(SIT1),Os02g0712700(-),Os03g0232900(-),Os03g0241600(OsRLCK105),Os03g0309200(PHYB),Os03g0717000(OsTMK),Os03g0719800(PHYA),Os03g0724300(-),Os03g0752300(TPKA),Os04g0109100(OsRLCK125),Os04g0109400(-),Os04g0288500(-),Os06g0210400(-),Os06g0660800(-),Os06g0663900(OsRLCK212),Os07g0129800(-),Os07g0129900(-),Os07g0130…	Os01g0171000(OsSERL5),Os02g0110600(-),Os02g0712600(-),Os03g0297600(OsPYL/RCAR4),Os03g0772700(-),Os05g0398800(-),Os05g0473000(OsPYL/RCAR6),Os07g0133000(-),Os08g0124000(-),Os08g0124100(-),Os08g0124500(-),Os08g0124700(-),Os08g0138700(OsRLCK245),Os09g0268000(-),Os09g0339000(-),Os10g0389800(-),Os10g0516200(OsRLCK303),Os12g0574700(-)
GO:0003674	Molecular Function	GO:0016530	metallochaperone activity	1	0	Os08g0561700(OsSOD4)	--
GO:0003674	Molecular Function	GO:0031386	protein tag	2	0	Os02g0161900(rubq2),Os09g0420800(-)	--
GO:0003674	Molecular Function	GO:0009055	electron carrier activity	13	8	MSTRG.30597(COX1),Os01g0174900(OsGRX1),Os01g0860601(-),Os02g0646400(OsGRX10),Os02g0813500(OsGR2),Os03g0429800(-),Os03g0835400(-),Os03g0835900(OsFd3),Os05g0198200(OsGRX16),Os05g0529700(OsDjC50),Os06g0681200(OsENODL18),Os07g0134800(SDH1),Os09g0572700(OsUCL33)	Os02g0578400(-),Os03g0709300(OsUCL9),Os03g0790700(AO),Os04g0473150(-),Os06g0101600(OsPC),Os06g0218600(OsUCL16),Os08g0482700(OsUCL30),Os09g0469300(OsUCL31)
GO:0003674	Molecular Function	GO:0045735	nutrient reservoir activity	2	6	Os03g0693700(OsOxO1),Os03g0693800(Osoxo4)	Os01g0952100(OsGLP1-5),Os08g0189400(GLP8-5),Os08g0189500(GLP8-6),Os08g0189900(GLP8-10),Os08g0190100(GLP8-11),Os08g0231400(GLP8-12)
GO:0003674	Molecular Function	GO:0000988	transcription factor activity, protein binding	7	1	Os01g0893400(-),Os03g0641700(OsMED19b),Os06g0688100(-),Os07g0173400(-),Os09g0375100(OsHSBP1),Os09g0512900(-),Os12g0290600(-)	Os07g0645200(-)
GO:0003674	Molecular Function	GO:0098772	molecular function regulator	31	13	Os01g0124200(RBBI3-1),Os01g0270100(-),Os01g0600200(-),Os01g0615100(OCPI2),Os01g0664500(-),Os01g0788400(OsPME6),Os01g0803200(Oc1*),Os02g0191700(-),Os02g0230100(-),Os02g0327000(OsGAP1),Os02g0709800(OsGAP1),Os02g0761900(-),Os03g0734300(-),Os03g0822700(-),Os05g0304400(OsGDI2),Os05g0494200(Oc2*),Os06g0338900(-),Os06g0618600(-),Os06g0699900(OsRpn1b),Os07g0186000(TRXH),Os07g0187700(PHF1),Os07g0271000(-)…	Os01g0123900(RBBI2-2),Os01g0124000(RBBI2-1),Os01g0127600(-),Os01g0178400(-),Os02g0608600(-),Os03g0297600(OsPYL/RCAR4),Os03g0323500(-),Os03g0429000(-),Os05g0361500(OsPME17),Os05g0473000(OsPYL/RCAR6),Os07g0556000(CycD6),Os07g0568700(FOR1),Os10g0508700(-)
GO:0003674	Molecular Function	GO:0001071	nucleic acid binding transcription factor activity	65	16	MSTRG.10517(NAC021),Os01g0165000(DREB2A),Os01g0185900(OsWRKY107),Os01g0195000(OsIDD2),Os01g0230200(OsbHLH074),Os01g0279900(OsbZIP03),Os01g0289600(OsWRKY9),Os01g0584900(OsWRKY77),Os01g0607400(OsWD40-17),Os01g0626400(WRKY11),Os01g0658900(OsBZ8),Os01g0734000(OsWRKY23),Os01g0808100(OsbZIP08),Os01g0881500(SCL1),Os01g0923600(CAMTA),Os01g0952800(OsIRO2),Os02g0182100(RR24),Os02g0232000(HSFC2A),Os02g05273…	Os01g0755500(OsPCF7),Os02g0656600(OsERF#032),Os02g0671300(OsbHLH076),Os02g0695200(OsMYB58/63-L),Os03g0231950(OsbHLH088),Os03g0797600(OsbHLH098),Os04g0546800(OsERF1),Os05g0137500(OsWRKY5),Os05g0443900(OsbZIP41),Os07g0605200(MADS18),Os08g0442400(AP2/EREBP#109),Os08g0481400(Oshox20),Os08g0499300(OsWRKY30),Os09g0434500(OsEREBP),Os09g0522200(OsDREB1A),Os10g0536100(OsMADS56)
GO:0003674	Molecular Function	GO:0005488	binding	1201	354	MSTRG.1359(ATJ15),MSTRG.14760(--),MSTRG.18365(TPS7),MSTRG.18399(ALA2),MSTRG.24743(KIN14M),MSTRG.25943(SIT2),MSTRG.25977(SD25),MSTRG.30597(COX1),MSTRG.30599(RPL5),MSTRG.30605(ATPA),MSTRG.30893(At2g28960),MSTRG.31615(CCR1),MSTRG.32225(RPL5),MSTRG.32226(NAD9),MSTRG.32231(CALS7),MSTRG.3364(CYP94B1),MSTRG.4386(CYP94A2),MSTRG.5895(ecdK),MSTRG.7894(PDC1),MSTRG.8096(RE1),Os01g0100900(SPL1),Os01g0115600(O…	MSTRG.11456(ndhH),MSTRG.11854(--),MSTRG.15723(--),MSTRG.18359(TPS7),MSTRG.21456(rpoA),MSTRG.24581(--),MSTRG.25061(LYK5),MSTRG.30905(At1g05700),MSTRG.5087(ndhF),MSTRG.9497(ndhF),Os01g0110100(Pho1),Os01g0113300(OsRLCK3),Os01g0113500(-),Os01g0117700(-),Os01g0126200(OsLPR2),Os01g0130200(-),Os01g0130400(-),Os01g0132100(-),Os01g0134500(OsSTE1),Os01g0138300(-),Os01g0171000(OsSERL5),Os01g0177900(PDR6),Os…
GO:0003674	Molecular Function	GO:0005198	structural molecule activity	18	6	MSTRG.30599(RPL5),MSTRG.32225(RPL5),Os01g0678600(-),Os01g0805000(-),Os03g0219900(-),Os03g0265400(-),Os03g0315800(-),Os03g0452300(-),Os03g0704000(-),Os04g0566900(-),Os04g0690300(-),Os05g0388500(-),Os06g0146400(OsISC7),Os07g0685400(-),gene-rps19-2(-),gene-rps2(-),gene-rps2-2(-),gene-rps7-3(-)	Os01g0282800(OsTUB1),Os03g0105600(OsTUB2),Os03g0755700(-),Os05g0413200(TUB6),Os08g0234000(-),gene-rps18(-)
GO:0005575	Cellular Component	GO:0016020	membrane	889	290	MSTRG.13824(--),MSTRG.18399(ALA2),MSTRG.30597(COX1),MSTRG.30605(ATPA),MSTRG.32226(NAD9),MSTRG.32231(CALS7),MSTRG.4776(KCS1),MSTRG.6412(DTX44),MSTRG.9376(--),MSTRG.9467(YMF16),Os01g0100900(SPL1),Os01g0103600(-),Os01g0121300(-),Os01g0130000(OsMTP9),Os01g0133400(OsPGLCT),Os01g0136700(-),Os01g0136800(OsWAK2),Os01g0136900(-),Os01g0152800(OsRLCK25),Os01g0163000(-),Os01g0172400(OsPLDalpha1),Os01g0175700…	MSTRG.11456(ndhH),MSTRG.15723(--),MSTRG.5087(ndhF),MSTRG.7378(DTC),MSTRG.9497(ndhF),Os01g0103100(-),Os01g0110100(Pho1),Os01g0113300(OsRLCK3),Os01g0117700(-),Os01g0118400(-),Os01g0126200(OsLPR2),Os01g0132100(-),Os01g0134500(OsSTE1),Os01g0138300(-),Os01g0171000(OsSERL5),Os01g0177900(PDR6),Os01g0239700(-),Os01g0254850(-),Os01g0329900(OsGELP14),Os01g0523100(-),Os01g0544200(-),Os01g0547600(NRT2.4),Os0…
GO:0005575	Cellular Component	GO:0044425	membrane part	739	253	MSTRG.18399(ALA2),MSTRG.30597(COX1),MSTRG.30605(ATPA),MSTRG.32226(NAD9),MSTRG.32231(CALS7),MSTRG.6412(DTX44),MSTRG.9467(YMF16),Os01g0100900(SPL1),Os01g0103600(-),Os01g0121300(-),Os01g0130000(OsMTP9),Os01g0133400(OsPGLCT),Os01g0136700(-),Os01g0136800(OsWAK2),Os01g0136900(-),Os01g0152800(OsRLCK25),Os01g0163000(-),Os01g0175700(BOR2),Os01g0179400(SSG4),Os01g0186600(-),Os01g0189700(-),Os01g0192300(OsM…	MSTRG.5087(ndhF),MSTRG.7378(DTC),MSTRG.9497(ndhF),Os01g0103100(-),Os01g0110100(Pho1),Os01g0113300(OsRLCK3),Os01g0117700(-),Os01g0118400(-),Os01g0126200(OsLPR2),Os01g0132100(-),Os01g0134500(OsSTE1),Os01g0138300(-),Os01g0171000(OsSERL5),Os01g0177900(PDR6),Os01g0239700(-),Os01g0254850(-),Os01g0329900(OsGELP14),Os01g0523100(-),Os01g0544200(-),Os01g0547600(NRT2.4),Os01g0648600(-),Os01g0666000(-),Os01g…
GO:0005575	Cellular Component	GO:0005576	extracellular region	61	60	Os01g0124200(RBBI3-1),Os01g0179400(SSG4),Os01g0270100(-),Os01g0327100(prx15),Os01g0382000(OsPR1b),Os01g0788400(OsPME6),Os01g0794800(-),Os01g0803200(Oc1*),Os01g0850550(OsLAC7),Os01g0892600(-),Os01g0897200(OsRNS2),Os02g0469600(-),Os02g0534400(OSCIN1),Os02g0696500(OsXTH23),Os02g0753800(ANN2),Os02g0797500(AST),Os03g0212800(Os3bglu6),Os03g0261100(PLA2-II),Os03g0318400(-),Os03g0661600(OsPR5),Os03g06634…	Os01g0123900(RBBI2-2),Os01g0124000(RBBI2-1),Os01g0127600(-),Os01g0294700(OsPOD),Os01g0326300(-),Os01g0382400(OsPR1#012),Os01g0823100(OsEXP2),Os01g0850700(OsLAC8),Os01g0860400(-),Os01g0892500(-),Os01g0952100(OsGLP1-5),Os02g0236800(prx26),Os02g0240100(prx30),Os02g0240300(prx29),Os02g0702400(-),Os03g0429000(-),Os04g0364800(-),Os04g0688200(prx60),Os04g0688300(prx61),Os05g0384300(-),Os05g0477600(OsEXP…
GO:0005575	Cellular Component	GO:0009295	nucleoid	4	1	Os03g0425000(AL1a),Os03g0824100(OspTAC2),Os06g0115400(OsFSD1.1),Os11g0425300(-)	Os05g0291700(-)
GO:0005575	Cellular Component	GO:0031012	extracellular matrix	1	0	Os02g0740700(OsMMP1)	--
GO:0005575	Cellular Component	GO:0030054	cell junction	21	14	MSTRG.18399(ALA2),MSTRG.7056(Os05g0567100),Os01g0327100(prx15),Os01g0864500(OsSDS1),Os02g0274100(AIM1),Os02g0666200(OsPIP1a),Os02g0823100(OsPIP1),Os03g0218400(OsMST4),Os03g0715500(OsTVLP1),Os03g0751100(OPT),Os03g0843300(OsLEA7),Os04g0559700(OsPIP1),Os04g0688500(prx62),Os07g0448100(OsPIP2),Os07g0448800(OsPIP2a),Os07g0495900(-),Os08g0102100(-),Os08g0157500(ROMT9),Os09g0123300(OsRLCK259),Os11g021690…	MSTRG.7378(DTC),Os01g0294700(OsPOD),Os01g0326100(RP-2),Os01g0326300(-),Os01g0952100(OsGLP1-5),Os03g0100020(OsTET4),Os04g0688200(prx60),Os04g0688300(prx61),Os05g0499400(prx75),Os06g0306300(prx78),Os07g0694300(prx116),Os08g0260600(OsTET11),Os08g0564700(-),Os12g0159600(-)
GO:0005575	Cellular Component	GO:0055044	symplast	19	13	Os01g0327100(prx15),Os01g0864500(OsSDS1),Os02g0274100(AIM1),Os02g0666200(OsPIP1a),Os02g0823100(OsPIP1),Os03g0218400(OsMST4),Os03g0715500(OsTVLP1),Os03g0751100(OPT),Os03g0843300(OsLEA7),Os04g0559700(OsPIP1),Os04g0688500(prx62),Os07g0448100(OsPIP2),Os07g0448800(OsPIP2a),Os07g0495900(-),Os08g0102100(-),Os08g0157500(ROMT9),Os09g0123300(OsRLCK259),Os11g0216900(OsIDI2),Os12g0640600(OsCCD1)	Os01g0294700(OsPOD),Os01g0326100(RP-2),Os01g0326300(-),Os01g0952100(OsGLP1-5),Os03g0100020(OsTET4),Os04g0688200(prx60),Os04g0688300(prx61),Os05g0499400(prx75),Os06g0306300(prx78),Os07g0694300(prx116),Os08g0260600(OsTET11),Os08g0564700(-),Os12g0159600(-)
GO:0005575	Cellular Component	GO:0044421	extracellular region part	9	2	Os01g0382000(OsPR1b),Os01g0794800(-),Os02g0469600(-),Os05g0508300(-),Os07g0127600(OsPR1#073),Os08g0561700(OsSOD4),Os09g0442300(-),Os10g0191300(OsPR1#101),Os10g0483500(OsCKX3)	Os01g0382400(OsPR1#012),Os09g0564000(-)
GO:0005575	Cellular Component	GO:0099512	supramolecular fiber	5	4	Os01g0125800(AIP1),Os02g0274100(AIM1),Os03g0773600(-),Os04g0566900(-),Os07g0512200(Atg8)	Os01g0282800(OsTUB1),Os03g0105600(OsTUB2),Os05g0413200(TUB6),Os10g0512800(OsRFPHC-10)
GO:0005575	Cellular Component	GO:0044464	cell part	1220	365	MSTRG.1359(ATJ15),MSTRG.13824(--),MSTRG.14760(--),MSTRG.15458(--),MSTRG.18399(ALA2),MSTRG.19312(BGLU15),MSTRG.19587(Rv2228c),MSTRG.21297(SFH6),MSTRG.24063(--),MSTRG.24064(--),MSTRG.24100(Rv2228c),MSTRG.24228(--),MSTRG.24743(KIN14M),MSTRG.25943(SIT2),MSTRG.28361(--),MSTRG.30299(--),MSTRG.30597(COX1),MSTRG.30599(RPL5),MSTRG.30605(ATPA),MSTRG.30781(TY3B-I),MSTRG.30893(At2g28960),MSTRG.31000(TPS9),MS…	MSTRG.11417(--),MSTRG.11456(ndhH),MSTRG.15723(--),MSTRG.18783(--),MSTRG.21456(rpoA),MSTRG.24751(ADT3),MSTRG.24903(ALDH2C4),MSTRG.29101(--),MSTRG.30905(At1g05700),MSTRG.4318(Rv2228c),MSTRG.4912(--),MSTRG.5051(--),MSTRG.5087(ndhF),MSTRG.6869(TY3B-I),MSTRG.7378(DTC),MSTRG.918(--),MSTRG.9497(ndhF),Os01g0110100(Pho1),Os01g0111100(OsCYP26-2),Os01g0126200(OsLPR2),Os01g0130200(-),Os01g0134500(OsSTE1),Os0…
GO:0005575	Cellular Component	GO:0005623	cell	1231	366	MSTRG.1359(ATJ15),MSTRG.13824(--),MSTRG.14760(--),MSTRG.15458(--),MSTRG.18399(ALA2),MSTRG.19312(BGLU15),MSTRG.19587(Rv2228c),MSTRG.21297(SFH6),MSTRG.24063(--),MSTRG.24064(--),MSTRG.24100(Rv2228c),MSTRG.24228(--),MSTRG.24743(KIN14M),MSTRG.25943(SIT2),MSTRG.28361(--),MSTRG.30299(--),MSTRG.30597(COX1),MSTRG.30599(RPL5),MSTRG.30605(ATPA),MSTRG.30781(TY3B-I),MSTRG.30893(At2g28960),MSTRG.31000(TPS9),MS…	MSTRG.11417(--),MSTRG.11456(ndhH),MSTRG.15723(--),MSTRG.18783(--),MSTRG.21456(rpoA),MSTRG.24751(ADT3),MSTRG.24903(ALDH2C4),MSTRG.29101(--),MSTRG.30905(At1g05700),MSTRG.4318(Rv2228c),MSTRG.4912(--),MSTRG.5051(--),MSTRG.5087(ndhF),MSTRG.6869(TY3B-I),MSTRG.7378(DTC),MSTRG.918(--),MSTRG.9497(ndhF),Os01g0110100(Pho1),Os01g0111100(OsCYP26-2),Os01g0126200(OsLPR2),Os01g0130200(-),Os01g0134500(OsSTE1),Os0…
GO:0005575	Cellular Component	GO:0044422	organelle part	327	71	MSTRG.13824(--),MSTRG.18399(ALA2),MSTRG.24743(KIN14M),MSTRG.30597(COX1),MSTRG.30599(RPL5),MSTRG.30605(ATPA),MSTRG.32225(RPL5),MSTRG.32226(NAD9),MSTRG.6412(DTX44),Os01g0100900(SPL1),Os01g0102600(OsSK4),Os01g0103600(-),Os01g0118000(-),Os01g0125800(AIP1),Os01g0130000(OsMTP9),Os01g0133400(OsPGLCT),Os01g0141600(OsRUS5),Os01g0173000(-),Os01g0174900(OsGRX1),Os01g0179400(SSG4),Os01g0227100(NYC1),Os01g022…	MSTRG.11456(ndhH),MSTRG.5087(ndhF),MSTRG.7378(DTC),MSTRG.9497(ndhF),Os01g0110100(Pho1),Os01g0126200(OsLPR2),Os01g0134500(OsSTE1),Os01g0282800(OsTUB1),Os01g0544450(OsMCM4),Os01g0547600(NRT2.4),Os01g0704100(NRT2.3),Os01g0720500(Lhcb1.1),Os01g0750300(OsCesA4),Os01g0763700(-),Os01g0902100(OsABCC2),Os01g0956600(-),Os02g0110200(HPL3),Os02g0110600(-),Os02g0273100(-),Os02g0675700(-),Os02g0797400(OsMCM5),…
GO:0005575	Cellular Component	GO:0031974	membrane-enclosed lumen	49	8	Os01g0174900(OsGRX1),Os01g0179400(SSG4),Os01g0266600(OsPrxII),Os01g0349400(OsPP5),Os01g0390300(-),Os01g0805000(-),Os01g0909500(-),Os01g0925700(-),Os02g0122800(-),Os02g0134300(OsTEF1),Os02g0194100(-),Os02g0232400(-),Os02g0293500(-),Os02g0530600(OsEnS-38),Os02g0551900(-),Os02g0598800(-),Os02g0732700(OsMed23_1),Os03g0452300(-),Os03g0641700(OsMED19b),Os03g0643300(OsOAT),Os03g0800200(MEL1),Os03g083540…	Os01g0956600(-),Os03g0370500(-),Os05g0579800(APC10),Os07g0517300(-),Os07g0645200(-),Os07g0659500(-),Os12g0530000(-),Os12g0548100(-)
GO:0005575	Cellular Component	GO:0043226	organelle	798	203	MSTRG.13824(--),MSTRG.14760(--),MSTRG.15458(--),MSTRG.18399(ALA2),MSTRG.19312(BGLU15),MSTRG.19587(Rv2228c),MSTRG.24063(--),MSTRG.24064(--),MSTRG.24100(Rv2228c),MSTRG.24228(--),MSTRG.24743(KIN14M),MSTRG.25943(SIT2),MSTRG.28361(--),MSTRG.30299(--),MSTRG.30597(COX1),MSTRG.30599(RPL5),MSTRG.30605(ATPA),MSTRG.30781(TY3B-I),MSTRG.30893(At2g28960),MSTRG.31000(TPS9),MSTRG.32225(RPL5),MSTRG.32226(NAD9),MS…	MSTRG.11417(--),MSTRG.11456(ndhH),MSTRG.15723(--),MSTRG.18783(--),MSTRG.21456(rpoA),MSTRG.24751(ADT3),MSTRG.29101(--),MSTRG.30905(At1g05700),MSTRG.4318(Rv2228c),MSTRG.4912(--),MSTRG.5051(--),MSTRG.5087(ndhF),MSTRG.6869(TY3B-I),MSTRG.7378(DTC),MSTRG.918(--),MSTRG.9497(ndhF),Os01g0110100(Pho1),Os01g0111100(OsCYP26-2),Os01g0126200(OsLPR2),Os01g0130200(-),Os01g0134500(OsSTE1),Os01g0178400(-),Os01g019…
GO:0005575	Cellular Component	GO:0032991	macromolecular complex	197	39	MSTRG.24743(KIN14M),MSTRG.27733(--),MSTRG.30599(RPL5),MSTRG.30605(ATPA),MSTRG.32225(RPL5),Os01g0148050(-),Os01g0254000(OsARL1d),Os01g0254900(-),Os01g0369000(OsCUL1-1),Os01g0383100(OsEXO70FX7),Os01g0383700(OsWD40-14),Os01g0390300(-),Os01g0533000(OsGSL9),Os01g0552000(-),Os01g0600200(-),Os01g0659200(v-ATP-E),Os01g0672500(OsGSL2),Os01g0678600(-),Os01g0754200(OsGSL3),Os01g0772800(-),Os01g0788200(-),Os…	Os01g0178400(-),Os01g0544450(OsMCM4),Os01g0720500(Lhcb1.1),Os01g0763700(-),Os01g0786700(-),Os01g0905200(OsEXO70FX15),Os01g0956600(-),Os01g0974701(-),Os02g0578400(-),Os02g0608600(-),Os02g0797400(OsMCM5),Os03g0343900(PsbX),Os03g0370500(-),Os03g0755700(-),Os03g0856500(-),Os04g0457000(CP24),Os04g0473150(-),Os05g0333200(D1),Os05g0508900(-),Os05g0579800(APC10),Os06g0160400(HGW),Os06g0167000(-),Os06g032…

## Sheet: zj-esa-vs-zj-esc
All enrichment GO terms of mRNAs of the comparison between zj-esa and zj-esc.
GO ID (level1)	GO Term (level1)	GO ID (level2)	GO Term (level2)	number_of_Pir1a-vs-Pir1c (up)	number_of_Pir1a-vs-Pir1c (down)	Genes_of_Pir1a-vs-Pir1c_up	Genes_of_Pir1a-vs-Pir1c_down
GO:0008150	Biological Process	GO:0044699	single-organism process	1241	365	MSTRG.10517(NAC021),MSTRG.13824(--),MSTRG.16908(TIC214),MSTRG.18399(ALA2),MSTRG.21469(ndhB1),MSTRG.24743(KIN14M),MSTRG.25968(JUB1),MSTRG.26094(--),MSTRG.2641(ABCB11),MSTRG.27676(CAMTA2),MSTRG.28425(--),MSTRG.2915(PFK7),MSTRG.30599(RPL5),MSTRG.30605(ATPA),MSTRG.31000(TPS9),MSTRG.31615(CCR1),MSTRG.32225(RPL5),MSTRG.32226(NAD9),MSTRG.32231(CALS7),MSTRG.3260(atpB),MSTRG.3364(CYP94B1),MSTRG.4652(MIK2)…	MSTRG.10139(RUP1),MSTRG.11456(ndhH),MSTRG.12956(CML20),MSTRG.1319(OCT2),MSTRG.15723(--),MSTRG.24903(ALDH2C4),MSTRG.27298(OCT2),MSTRG.30707(PBL3),MSTRG.30903(SIRK),MSTRG.3725(NAT12),MSTRG.5087(ndhF),MSTRG.7378(DTC),MSTRG.9497(ndhF),Os01g0100400(-),Os01g0103100(-),Os01g0110100(Pho1),Os01g0134500(OsSTE1),Os01g0192000(DOS),Os01g0238500(-),Os01g0248701(-),Os01g0264700(-),Os01g0273100(OsUBC27),Os01g027…
GO:0008150	Biological Process	GO:0051179	localization	436	88	MSTRG.13824(--),MSTRG.18399(ALA2),MSTRG.21297(SFH6),MSTRG.21469(ndhB1),MSTRG.2641(ABCB11),MSTRG.30605(ATPA),MSTRG.32226(NAD9),MSTRG.3260(atpB),MSTRG.7056(Os05g0567100),MSTRG.9376(--),MSTRG.9463(RPS12),MSTRG.9475(atpH),Os01g0130000(OsMTP9),Os01g0179400(SSG4),Os01g0182200(OsSIP1),Os01g0191500(-),Os01g0218700(OsABCD1),Os01g0227300(OsRab7B1),Os01g0231500(-),Os01g0232400(-),Os01g0242600(OsNTMC2T6.1),O…	MSTRG.11456(ndhH),MSTRG.24903(ALDH2C4),MSTRG.30707(PBL3),MSTRG.3725(NAT12),MSTRG.5087(ndhF),MSTRG.7378(DTC),MSTRG.9497(ndhF),Os01g0100400(-),Os01g0103100(-),Os01g0110100(Pho1),Os01g0264700(-),Os01g0704100(NRT2.3),Os01g0850700(OsLAC8),Os01g0856500(OsLAX1),Os01g0857500(-),Os01g0872000(-),Os01g0882800(OsAAP11E),Os01g0902100(OsABCC2),Os01g0902700(-),Os01g0905200(OsEXO70FX15),Os01g0952100(OsGLP1-5),Os…
GO:0008150	Biological Process	GO:0051704	multi-organism process	90	32	MSTRG.25968(JUB1),MSTRG.27676(CAMTA2),MSTRG.4664(PUB21),Os01g0276800(Gas2),Os01g0580100(-),Os01g0642700(-),Os01g0670100(-),Os01g0853400(OsCOI1a),Os01g0884300(OsNAC6),Os01g0885700(-),Os01g0923700(HK3),Os01g0934000(OsATG18c),Os01g0960500(-),Os02g0115700(CATA1),Os02g0234300(OsPUB4),Os02g0327000(OsGAP1),Os02g0503900(-),Os02g0621500(-),Os02g0640500(SIT1),Os02g0712700(-),Os03g0137500(OSVDAC6),Os03g0146…	MSTRG.24903(ALDH2C4),MSTRG.30707(PBL3),Os01g0130200(-),Os01g0508500(RH2),Os01g0669100(OsLSK1),Os01g0750300(OsCesA4),Os01g0784700(-),Os01g0882500(-),Os01g0889900(-),Os02g0712600(-),Os03g0132900(Cht11),Os03g0221700(-),Os03g0772700(-),Os04g0401000(PI21),Os04g0419900(YK18),Os04g0618700(Os-FLS2),Os05g0165900(-),Os05g0166300(-),Os06g0164900(-),Os07g0133000(-),Os07g0290200(OsLTPd4),Os07g0694300(prx116),…
GO:0008150	Biological Process	GO:0050896	response to stimulus	433	155	MSTRG.10517(NAC021),MSTRG.11273(CLPB1),MSTRG.1359(ATJ15),MSTRG.24228(--),MSTRG.25968(JUB1),MSTRG.27676(CAMTA2),MSTRG.30605(ATPA),MSTRG.31000(TPS9),MSTRG.4652(MIK2),MSTRG.4664(PUB21),MSTRG.6848(--),MSTRG.7056(Os05g0567100),MSTRG.7894(PDC1),Os01g0104000(-),Os01g0118000(-),Os01g0182600(GI),Os01g0184900(BIP104),Os01g0186700(-),Os01g0187900(-),Os01g0198000(OsRDR4),Os01g0209700(OsGA2ox7),Os01g0227300(O…	MSTRG.10139(RUP1),MSTRG.10972(NUDT8),MSTRG.12956(CML20),MSTRG.15723(--),MSTRG.24903(ALDH2C4),MSTRG.30707(PBL3),MSTRG.5074(--),MSTRG.7378(DTC),Os01g0110100(Pho1),Os01g0130200(-),Os01g0192000(DOS),Os01g0225600(Lea14A),Os01g0278000(OsVQ1),Os01g0294700(OsPOD),Os01g0326100(RP-2),Os01g0326300(-),Os01g0358100(OsRALF-6),Os01g0360200(RBOHB),Os01g0364800(OsWAK7/8),Os01g0365000(-),Os01g0508500(RH2),Os01g054…
GO:0008150	Biological Process	GO:0023052	signaling	154	53	MSTRG.10517(NAC021),MSTRG.4652(MIK2),MSTRG.6848(--),Os01g0104000(-),Os01g0186700(-),Os01g0227300(OsRab7B1),Os01g0279300(OsCaM3),Os01g0286100(PIL15),Os01g0296100(-),Os01g0505600(OsCML11),Os01g0558600(OsRab1B2),Os01g0643800(-),Os01g0689900(OsWAK10),Os01g0783200(-),Os01g0816600(-),Os01g0853400(OsCOI1a),Os01g0923700(HK3),Os01g0923900(OsFbox053),Os01g0952800(OsIRO2),Os01g0960500(-),Os02g0135200(OsMPK1…	MSTRG.12956(CML20),MSTRG.15723(--),MSTRG.30707(PBL3),Os01g0192000(DOS),Os01g0358100(OsRALF-6),Os01g0364800(OsWAK7/8),Os01g0365000(-),Os01g0743800(OsPHP1),Os01g0827800(OsPYL/RCAR1),Os01g0856500(OsLAX1),Os01g0917500(MSP1),Os02g0110600(-),Os02g0126400(CDPK4),Os02g0322400(-),Os02g0628600(OsARF8),Os02g0633066(OsWAK16),Os02g0723400(OsIAA8),Os03g0227700(OsDWF4),Os03g0232600(ELF1),Os03g0292700(-),Os03g02…
GO:0008150	Biological Process	GO:0098754	detoxification	13	26	Os01g0327100(prx15),Os02g0115700(CATA1),Os02g0635200(NIT1),Os02g0646400(OsGRX10),Os02g0813500(OsGR2),Os03g0358100(OsGpx2),Os03g0762300(-),Os03g0762400(prx51),Os04g0434800(OsAPx7),Os04g0556000(HMA5),Os04g0556300(OsGpx1),Os05g0323900(SODA1),Os06g0727200(CATB)	Os01g0294700(OsPOD),Os01g0326100(RP-2),Os01g0326300(-),Os01g0360200(RBOHB),Os01g0835500(rbohE),Os02g0129800(-),Os02g0236800(prx26),Os02g0240100(prx30),Os02g0240300(prx29),Os03g0368900(PRX45),Os04g0688100(prx59),Os04g0688200(prx60),Os04g0688300(prx61),Os06g0306300(prx78),Os06g0521500(prx83),Os06g0547400(prx86),Os06g0695300(prx92),Os07g0115300(prx98),Os07g0676900(prx109),Os07g0677100(POX8.1),Os07g0…
GO:0008150	Biological Process	GO:0002376	immune system process	17	6	MSTRG.25968(JUB1),MSTRG.6848(--),Os01g0575500(OsWD40-16),Os01g0958700(-),Os02g0234300(OsPUB4),Os02g0327000(OsGAP1),Os02g0475300(-),Os02g0629400(-),Os03g0146400(OsPAO),Os03g0270000(-),Os03g0643300(OsOAT),Os03g0698900(-),Os04g0379600(-),Os04g0509300(DCL4),Os05g0235300(OsTOR),Os07g0673200(OsNLA1),Os10g0498700(OsMed16_1)	MSTRG.24903(ALDH2C4),MSTRG.30707(PBL3),Os01g0130200(-),Os01g0508500(RH2),Os01g0882500(-),Os07g0290200(OsLTPd4)
GO:0008150	Biological Process	GO:0040011	locomotion	4	1	Os01g0580100(-),Os02g0742200(OsRac3),Os06g0234200(OsRAC4),Os08g0544500(LPL3)	Os11g0524300(-)
GO:0008150	Biological Process	GO:0048511	rhythmic process	6	0	Os01g0182600(GI),Os01g0498200(-),Os02g0115700(CATA1),Os06g0727200(CATB),Os10g0498700(OsMed16_1),Os11g0547000(FKF1)	--
GO:0008150	Biological Process	GO:0022414	reproductive process	72	26	MSTRG.10517(NAC021),Os01g0169500(-),Os01g0182600(GI),Os01g0390300(-),Os01g0580100(-),Os01g0587300(-),Os01g0642700(-),Os01g0667200(GLYII-1),Os01g0670100(-),Os01g0733600(-),Os01g0812000(GAMYB),Os01g0885700(-),Os01g0922800(MADS51),Os01g0923700(HK3),Os02g0274100(AIM1),Os02g0319100(-),Os02g0623500(-),Os02g0649900(YSL2),Os02g0719800(-),Os03g0100400(XPF),Os03g0146400(OsPAO),Os03g0170900(OsSUT1),Os03g030…	Os01g0669100(OsLSK1),Os01g0784700(-),Os01g0889900(-),Os01g0917500(MSP1),Os02g0642600(-),Os03g0100020(OsTET4),Os03g0221700(-),Os03g0727600(ACS1),Os03g0856700(GA20OX1),Os04g0419900(YK18),Os04g0653000(EG2),Os05g0165900(-),Os05g0166300(-),Os05g0421900(GA20OX4),Os06g0164900(-),Os07g0517300(-),Os07g0568700(FOR1),Os07g0605200(MADS18),Os07g0616200(-),Os07g0659500(-),Os09g0451400(ACO2),Os10g0555600(OsEXPB…
GO:0008150	Biological Process	GO:0000003	reproduction	72	26	MSTRG.10517(NAC021),Os01g0169500(-),Os01g0182600(GI),Os01g0390300(-),Os01g0580100(-),Os01g0587300(-),Os01g0642700(-),Os01g0667200(GLYII-1),Os01g0670100(-),Os01g0733600(-),Os01g0812000(GAMYB),Os01g0885700(-),Os01g0922800(MADS51),Os01g0923700(HK3),Os02g0274100(AIM1),Os02g0319100(-),Os02g0623500(-),Os02g0649900(YSL2),Os02g0719800(-),Os03g0100400(XPF),Os03g0146400(OsPAO),Os03g0170900(OsSUT1),Os03g030…	Os01g0669100(OsLSK1),Os01g0784700(-),Os01g0889900(-),Os01g0917500(MSP1),Os02g0642600(-),Os03g0100020(OsTET4),Os03g0221700(-),Os03g0727600(ACS1),Os03g0856700(GA20OX1),Os04g0419900(YK18),Os04g0653000(EG2),Os05g0165900(-),Os05g0166300(-),Os05g0421900(GA20OX4),Os06g0164900(-),Os07g0517300(-),Os07g0568700(FOR1),Os07g0605200(MADS18),Os07g0616200(-),Os07g0659500(-),Os09g0451400(ACO2),Os10g0555600(OsEXPB…
GO:0008150	Biological Process	GO:0040007	growth	17	4	Os01g0575500(OsWD40-16),Os01g0884300(OsNAC6),Os01g0923700(HK3),Os02g0204700(OsCYP734A2),Os04g0648800(OsHIP1),Os05g0235300(OsTOR),Os05g0593100(-),Os06g0600400(OsCYP734A4),Os07g0563800(-),Os07g0597200(-),Os07g0675000(-),Os08g0104100(-),Os08g0191000(OsPILS2),Os08g0425700(OsANN7),Os08g0544500(LPL3),Os09g0133200(-),Os11g0572400(-)	Os03g0227700(OsDWF4),Os03g0418700(-),Os03g0856700(GA20OX1),Os05g0421900(GA20OX4)
GO:0008150	Biological Process	GO:0032501	multicellular organismal process	108	39	MSTRG.10517(NAC021),MSTRG.25968(JUB1),MSTRG.32231(CALS7),MSTRG.9376(--),Os01g0169500(-),Os01g0182600(GI),Os01g0575500(OsWD40-16),Os01g0580100(-),Os01g0587300(-),Os01g0642700(-),Os01g0667200(GLYII-1),Os01g0670100(-),Os01g0733600(-),Os01g0812000(GAMYB),Os01g0862300(-),Os01g0884300(OsNAC6),Os01g0885700(-),Os01g0922800(MADS51),Os01g0923700(HK3),Os01g0923900(OsFbox053),Os01g0934000(OsATG18c),Os01g0976…	Os01g0192000(DOS),Os01g0544450(OsMCM4),Os01g0669100(OsLSK1),Os01g0784700(-),Os01g0889400(CRL1L3),Os01g0889900(-),Os01g0917500(MSP1),Os01g0952100(OsGLP1-5),Os02g0606200(OsBBX4),Os02g0646200(OsBBX6),Os02g0697400(4CL2),Os02g0756100(-),Os03g0100020(OsTET4),Os03g0221700(-),Os03g0227700(OsDWF4),Os03g0727600(ACS1),Os03g0856700(GA20OX1),Os04g0419900(YK18),Os04g0469800(D11),Os04g0550600(HTD1),Os04g0653000…
GO:0008150	Biological Process	GO:0008152	metabolic process	1448	470	MSTRG.10517(NAC021),MSTRG.11084(--),MSTRG.11273(CLPB1),MSTRG.14760(--),MSTRG.14792(SIT2),MSTRG.16908(TIC214),MSTRG.19587(Rv2228c),MSTRG.21469(ndhB1),MSTRG.24063(--),MSTRG.24100(Rv2228c),MSTRG.24228(--),MSTRG.24389(--),MSTRG.25943(SIT2),MSTRG.25968(JUB1),MSTRG.25977(SD25),MSTRG.26094(--),MSTRG.26724(rpl2-A),MSTRG.27676(CAMTA2),MSTRG.27933(rpl22),MSTRG.28361(--),MSTRG.28363(--),MSTRG.28425(--),MSTR…	MSTRG.11456(ndhH),MSTRG.11540(--),MSTRG.12956(CML20),MSTRG.15447(--),MSTRG.15723(--),MSTRG.17153(LRK10L-1.5),MSTRG.17868(--),MSTRG.17964(--),MSTRG.18085(--),MSTRG.18783(--),MSTRG.21456(rpoA),MSTRG.24867(--),MSTRG.24903(ALDH2C4),MSTRG.25061(LYK5),MSTRG.26585(--),MSTRG.28560(--),MSTRG.29101(--),MSTRG.30707(PBL3),MSTRG.30903(SIRK),MSTRG.30905(At1g05700),MSTRG.31249(--),MSTRG.4318(Rv2228c),MSTRG.4912…
GO:0008150	Biological Process	GO:0048518	positive regulation of biological process	93	16	Os01g0125800(AIP1),Os01g0165000(DREB2A),Os01g0169500(-),Os01g0230200(OsbHLH074),Os01g0587300(-),Os01g0668300(-),Os01g0884300(OsNAC6),Os01g0922800(MADS51),Os01g0923600(CAMTA),Os01g0925700(-),Os01g0934000(OsATG18c),Os01g0952800(OsIRO2),Os01g0954500(-),Os02g0134300(OsTEF1),Os02g0179800(-),Os02g0230100(-),Os02g0232000(HSFC2A),Os02g0235000(-),Os02g0272600(-),Os02g0319100(-),Os02g0327000(OsGAP1),Os02g0…	MSTRG.30707(PBL3),Os01g0808900(OsVQ4),Os02g0198300(-),Os02g0322400(-),Os02g0671300(OsbHLH076),Os03g0251800(-),Os03g0292700(-),Os05g0390800(OsVQ19),Os05g0491700(OsVQ20),Os06g0217300(OsMADS55),Os07g0517300(-),Os07g0556000(CycD6),Os07g0605200(MADS18),Os08g0481400(Oshox20),Os10g0536100(OsMADS56),Os12g0581800(CycA3)
GO:0008150	Biological Process	GO:0048519	negative regulation of biological process	77	33	MSTRG.19587(Rv2228c),MSTRG.24063(--),MSTRG.24100(Rv2228c),MSTRG.24389(--),MSTRG.25968(JUB1),MSTRG.28361(--),MSTRG.28363(--),MSTRG.30299(--),MSTRG.30781(TY3B-I),MSTRG.32149(--),MSTRG.5050(--),Os01g0124200(RBBI3-1),Os01g0169500(-),Os01g0198000(OsRDR4),Os01g0198100(-),Os01g0267300(OsSRP-QKG),Os01g0286100(PIL15),Os01g0575500(OsWD40-16),Os01g0615050(-),Os01g0615100(OCPI2),Os01g0664500(-),Os01g0668300(…	MSTRG.11540(--),MSTRG.15447(--),MSTRG.17868(--),MSTRG.17964(--),MSTRG.18085(--),MSTRG.18783(--),MSTRG.24867(--),MSTRG.28560(--),MSTRG.29101(--),MSTRG.31249(--),MSTRG.4318(Rv2228c),MSTRG.4912(--),MSTRG.5051(--),Os01g0123900(RBBI2-2),Os01g0124000(RBBI2-1),Os01g0127600(-),Os01g0827800(OsPYL/RCAR1),Os03g0297600(OsPYL/RCAR4),Os03g0429000(-),Os03g0755700(-),Os03g0856500(-),Os04g0106000(-),Os04g0577700(…
GO:0008150	Biological Process	GO:0032502	developmental process	103	35	MSTRG.10517(NAC021),MSTRG.25968(JUB1),MSTRG.32231(CALS7),MSTRG.9376(--),Os01g0169500(-),Os01g0182600(GI),Os01g0575500(OsWD40-16),Os01g0580100(-),Os01g0587300(-),Os01g0667200(GLYII-1),Os01g0668000(-),Os01g0733600(-),Os01g0812000(GAMYB),Os01g0862300(-),Os01g0874300(R2R3-MYB),Os01g0884300(OsNAC6),Os01g0922800(MADS51),Os01g0923700(HK3),Os01g0923900(OsFbox053),Os01g0934000(OsATG18c),Os01g0976000(-),Os…	Os01g0192000(DOS),Os01g0544450(OsMCM4),Os01g0889400(CRL1L3),Os01g0917500(MSP1),Os01g0952100(OsGLP1-5),Os02g0110600(-),Os02g0606200(OsBBX4),Os02g0646200(OsBBX6),Os02g0695200(OsMYB58/63-L),Os02g0697400(4CL2),Os02g0756100(-),Os03g0100020(OsTET4),Os03g0227700(OsDWF4),Os03g0418700(-),Os03g0727600(ACS1),Os03g0856700(GA20OX1),Os04g0469800(D11),Os04g0550600(HTD1),Os04g0653000(EG2),Os05g0101600(-),Os05g01…
GO:0008150	Biological Process	GO:0009987	cellular process	1558	459	MSTRG.10517(NAC021),MSTRG.11084(--),MSTRG.11273(CLPB1),MSTRG.14760(--),MSTRG.14792(SIT2),MSTRG.19587(Rv2228c),MSTRG.21469(ndhB1),MSTRG.24063(--),MSTRG.24100(Rv2228c),MSTRG.24228(--),MSTRG.24389(--),MSTRG.24743(KIN14M),MSTRG.25943(SIT2),MSTRG.25968(JUB1),MSTRG.25977(SD25),MSTRG.26094(--),MSTRG.2641(ABCB11),MSTRG.27676(CAMTA2),MSTRG.28361(--),MSTRG.28363(--),MSTRG.28771(--),MSTRG.2915(PFK7),MSTRG.3…	MSTRG.10139(RUP1),MSTRG.11456(ndhH),MSTRG.11540(--),MSTRG.12956(CML20),MSTRG.1319(OCT2),MSTRG.15447(--),MSTRG.15723(--),MSTRG.17153(LRK10L-1.5),MSTRG.17868(--),MSTRG.17964(--),MSTRG.18085(--),MSTRG.18783(--),MSTRG.21456(rpoA),MSTRG.24867(--),MSTRG.24903(ALDH2C4),MSTRG.25061(LYK5),MSTRG.26585(--),MSTRG.27298(OCT2),MSTRG.28560(--),MSTRG.29101(--),MSTRG.30707(PBL3),MSTRG.30903(SIRK),MSTRG.30905(At1g…
GO:0008150	Biological Process	GO:0065007	biological regulation	520	146	MSTRG.10517(NAC021),MSTRG.11273(CLPB1),MSTRG.14760(--),MSTRG.19587(Rv2228c),MSTRG.24063(--),MSTRG.24100(Rv2228c),MSTRG.24389(--),MSTRG.25968(JUB1),MSTRG.28361(--),MSTRG.28363(--),MSTRG.30299(--),MSTRG.30781(TY3B-I),MSTRG.32149(--),MSTRG.32231(CALS7),MSTRG.4652(MIK2),MSTRG.5050(--),MSTRG.6848(--),Os01g0104000(-),Os01g0120400(-),Os01g0124200(RBBI3-1),Os01g0125800(AIP1),Os01g0128000(-),Os01g0130000(…	MSTRG.11540(--),MSTRG.12956(CML20),MSTRG.15447(--),MSTRG.15723(--),MSTRG.17868(--),MSTRG.17964(--),MSTRG.18085(--),MSTRG.18783(--),MSTRG.24867(--),MSTRG.28560(--),MSTRG.29101(--),MSTRG.30707(PBL3),MSTRG.30903(SIRK),MSTRG.31249(--),MSTRG.4318(Rv2228c),MSTRG.4912(--),MSTRG.5051(--),MSTRG.8350(--),Os01g0100400(-),Os01g0108600(-),Os01g0123900(RBBI2-2),Os01g0124000(RBBI2-1),Os01g0127600(-),Os01g013020…
GO:0008150	Biological Process	GO:0050789	regulation of biological process	452	134	MSTRG.10517(NAC021),MSTRG.11273(CLPB1),MSTRG.14760(--),MSTRG.19587(Rv2228c),MSTRG.24063(--),MSTRG.24100(Rv2228c),MSTRG.24389(--),MSTRG.25968(JUB1),MSTRG.28361(--),MSTRG.28363(--),MSTRG.30299(--),MSTRG.30781(TY3B-I),MSTRG.32149(--),MSTRG.32231(CALS7),MSTRG.4652(MIK2),MSTRG.5050(--),MSTRG.6848(--),Os01g0104000(-),Os01g0120400(-),Os01g0124200(RBBI3-1),Os01g0125800(AIP1),Os01g0128000(-),Os01g0159800(…	MSTRG.11540(--),MSTRG.12956(CML20),MSTRG.15447(--),MSTRG.15723(--),MSTRG.17868(--),MSTRG.17964(--),MSTRG.18085(--),MSTRG.18783(--),MSTRG.24867(--),MSTRG.28560(--),MSTRG.29101(--),MSTRG.30707(PBL3),MSTRG.30903(SIRK),MSTRG.31249(--),MSTRG.4318(Rv2228c),MSTRG.4912(--),MSTRG.5051(--),MSTRG.8350(--),Os01g0108600(-),Os01g0123900(RBBI2-2),Os01g0124000(RBBI2-1),Os01g0127600(-),Os01g0130200(-),Os01g019200…
GO:0008150	Biological Process	GO:0071840	cellular component organization or biogenesis	227	57	MSTRG.32231(CALS7),MSTRG.9475(atpH),Os01g0125800(AIP1),Os01g0179400(SSG4),Os01g0191500(-),Os01g0198000(OsRDR4),Os01g0232400(-),Os01g0277600(osALA2),Os01g0355500(OsDjC5),Os01g0390300(-),Os01g0505600(OsCML11),Os01g0626300(-),Os01g0668300(-),Os01g0681100(OsDRP1B),Os01g0733600(-),Os01g0772800(-),Os01g0773100(-),Os01g0788400(OsPME6),Os01g0830000(OsABCI5),Os01g0834200(-),Os01g0865100(-),Os01g0892600(-)…	Os01g0273100(OsUBC27),Os01g0544450(OsMCM4),Os01g0750300(OsCesA4),Os01g0763700(-),Os01g0805900(OsTUB4),Os01g0823100(OsEXP2),Os01g0858500(-),Os01g0880200(-),Os01g0882500(-),Os01g0892500(-),Os01g0927000(SDG714),Os02g0642600(-),Os02g0697400(4CL2),Os02g0797400(OsMCM5),Os03g0105600(OsTUB2),Os03g0131900(OscpSRP43),Os03g0209500(-),Os03g0227700(OsDWF4),Os03g0333400(-),Os03g0416200(BC1),Os03g0418700(-),Os0…
GO:0003674	Molecular Function	GO:0003824	catalytic activity	1326	452	MSTRG.11084(--),MSTRG.11273(CLPB1),MSTRG.12705(ART3),MSTRG.14792(SIT2),MSTRG.16908(TIC214),MSTRG.18118(--),MSTRG.18365(TPS7),MSTRG.18399(ALA2),MSTRG.21469(ndhB1),MSTRG.24743(KIN14M),MSTRG.25943(SIT2),MSTRG.25977(SD25),MSTRG.2641(ABCB11),MSTRG.26724(rpl2-A),MSTRG.28425(--),MSTRG.2915(PFK7),MSTRG.30605(ATPA),MSTRG.30893(At2g28960),MSTRG.31000(TPS9),MSTRG.31615(CCR1),MSTRG.32226(NAD9),MSTRG.32231(CA…	MSTRG.10139(RUP1),MSTRG.10972(NUDT8),MSTRG.11456(ndhH),MSTRG.15723(--),MSTRG.17153(LRK10L-1.5),MSTRG.17710(LECRK43),MSTRG.18359(TPS7),MSTRG.21456(rpoA),MSTRG.24903(ALDH2C4),MSTRG.25061(LYK5),MSTRG.26585(--),MSTRG.27115(HIDM),MSTRG.30707(PBL3),MSTRG.30903(SIRK),MSTRG.30905(At1g05700),MSTRG.5087(ndhF),MSTRG.9282(LOC_Os12g27220),MSTRG.9497(ndhF),Os01g0100400(-),Os01g0111100(OsCYP26-2),Os01g0117700(-…
GO:0003674	Molecular Function	GO:0005215	transporter activity	234	64	MSTRG.18399(ALA2),MSTRG.21297(SFH6),MSTRG.2641(ABCB11),MSTRG.30605(ATPA),MSTRG.3260(atpB),MSTRG.6412(DTX44),MSTRG.9475(atpH),Os01g0130000(OsMTP9),Os01g0182200(OsSIP1),Os01g0218700(OsABCD1),Os01g0277600(osALA2),Os01g0297700(OsUMAMIT5),Os01g0337500(-),Os01g0385400(OsSLAC7),Os01g0504500(-),Os01g0557500(OsCAX1a),Os01g0571000(-),Os01g0606000(OsSWEET6a),Os01g0607200(OsBAT1),Os01g0623200(SLAC),Os01g0645…	MSTRG.1319(OCT2),MSTRG.27298(OCT2),MSTRG.3725(NAT12),MSTRG.7378(DTC),Os01g0103100(-),Os01g0110100(Pho1),Os01g0264700(-),Os01g0704100(NRT2.3),Os01g0856500(OsLAX1),Os01g0857500(-),Os01g0872000(-),Os01g0882800(OsAAP11E),Os01g0902100(OsABCC2),Os01g0902700(-),Os02g0102200(OsAAP7C),Os02g0211000(OsABCA1),Os02g0301100(OsSWEET4),Os02g0318450(-),Os02g0498300(-),Os02g0695800(OsOPT8),Os02g0695900(-),Os03g010…
GO:0003674	Molecular Function	GO:0016209	antioxidant activity	15	25	Os01g0327100(prx15),Os01g0855200(-),Os02g0115700(CATA1),Os02g0646400(OsGRX10),Os02g0753800(ANN2),Os02g0813500(OsGR2),Os03g0358100(OsGpx2),Os03g0762300(-),Os03g0762400(prx51),Os04g0434800(OsAPx7),Os04g0556300(OsGpx1),Os05g0323900(SODA1),Os06g0221200(OsANN5),Os06g0727200(CATB),Os07g0665200(Cu/Zn-SOD)	Os01g0294700(OsPOD),Os01g0326100(RP-2),Os01g0326300(-),Os01g0360200(RBOHB),Os01g0835500(rbohE),Os02g0236800(prx26),Os02g0240100(prx30),Os02g0240300(prx29),Os03g0368900(PRX45),Os04g0688100(prx59),Os04g0688200(prx60),Os04g0688300(prx61),Os06g0306300(prx78),Os06g0521500(prx83),Os06g0547400(prx86),Os06g0695300(prx92),Os07g0115300(prx98),Os07g0676900(prx109),Os07g0677100(POX8.1),Os07g0677200(POX22.3),…
GO:0003674	Molecular Function	GO:0004871	signal transducer activity	44	17	Os01g0104000(-),Os01g0643800(-),Os01g0923700(HK3),Os02g0117500(OsGLR3.1),Os02g0135200(OsMPK13),Os02g0148100(OsMAPK33),Os02g0629400(-),Os02g0640500(SIT1),Os02g0712700(-),Os03g0232900(-),Os03g0241600(OsRLCK105),Os03g0309200(PHYB),Os03g0719800(PHYA),Os03g0724300(-),Os03g0772600(-),Os04g0109100(OsRLCK125),Os04g0288500(-),Os04g0531500(-),Os05g0213500(OsPYL/RCAR5),Os06g0190700(OsGLR4.8),Os06g0210400(-)…	Os01g0743800(OsPHP1),Os01g0827800(OsPYL/RCAR1),Os02g0110600(-),Os02g0712600(-),Os03g0297600(OsPYL/RCAR4),Os03g0772700(-),Os04g0685900(OsRLCK174),Os05g0398800(-),Os05g0473000(OsPYL/RCAR6),Os05g0589700(OsRLCK191),Os07g0133000(-),Os08g0124100(-),Os08g0124700(-),Os09g0268000(-),Os09g0339000(-),Os10g0389800(-),Os10g0533150(-)
GO:0003674	Molecular Function	GO:0060089	molecular transducer activity	39	16	Os01g0104000(-),Os01g0923700(HK3),Os02g0117500(OsGLR3.1),Os02g0629400(-),Os02g0640500(SIT1),Os02g0712700(-),Os03g0232900(-),Os03g0241600(OsRLCK105),Os03g0309200(PHYB),Os03g0719800(PHYA),Os03g0724300(-),Os03g0772600(-),Os04g0109100(OsRLCK125),Os04g0288500(-),Os04g0531500(-),Os05g0213500(OsPYL/RCAR5),Os06g0190700(OsGLR4.8),Os06g0210400(-),Os06g0660800(-),Os06g0663900(OsRLCK212),Os07g0129800(-),Os07…	Os01g0827800(OsPYL/RCAR1),Os02g0110600(-),Os02g0712600(-),Os03g0297600(OsPYL/RCAR4),Os03g0772700(-),Os04g0685900(OsRLCK174),Os05g0398800(-),Os05g0473000(OsPYL/RCAR6),Os05g0589700(OsRLCK191),Os07g0133000(-),Os08g0124100(-),Os08g0124700(-),Os09g0268000(-),Os09g0339000(-),Os10g0389800(-),Os10g0533150(-)
GO:0003674	Molecular Function	GO:0031386	protein tag	3	0	Os01g0918200(-),Os02g0161900(rubq2),Os10g0475900(-)	--
GO:0003674	Molecular Function	GO:0009055	electron carrier activity	14	9	Os01g0174900(OsGRX1),Os01g0860601(-),Os02g0646400(OsGRX10),Os02g0813500(OsGR2),Os03g0356400(OsGRL6),Os03g0429800(-),Os03g0835400(-),Os04g0674400(-),Os05g0529700(OsDjC50),Os06g0681200(OsENODL18),Os07g0134800(SDH1),Os07g0282300(OsAAO3),Os08g0137800(OsUCL24),Os09g0572700(OsUCL33)	Os02g0578400(-),Os03g0659266(-),Os03g0709300(OsUCL9),Os04g0473150(-),Os06g0101600(OsPC),Os07g0105600(-),Os08g0482700(OsUCL30),Os09g0469300(OsUCL31),gene-psbA(-)
GO:0003674	Molecular Function	GO:0000988	transcription factor activity, protein binding	10	1	Os03g0641700(OsMED19b),Os04g0271000(osSRT701),Os05g0100500(-),Os05g0588700(-),Os06g0688100(-),Os07g0173400(-),Os08g0564800(OsMED15_2),Os09g0281900(OsMed14_2),Os09g0573200(-),Os12g0290600(-)	Os07g0645200(-)
GO:0003674	Molecular Function	GO:0098772	molecular function regulator	36	17	Os01g0124200(RBBI3-1),Os01g0267300(OsSRP-QKG),Os01g0600200(-),Os01g0615050(-),Os01g0615100(OCPI2),Os01g0664500(-),Os01g0788400(OsPME6),Os01g0803200(Oc1*),Os01g0976000(-),Os02g0191700(-),Os02g0230100(-),Os02g0327000(OsGAP1),Os02g0709800(OsGAP1),Os02g0761900(-),Os02g0762400(KRP1),Os03g0734300(-),Os03g0822700(-),Os05g0213500(OsPYL/RCAR5),Os05g0304400(OsGDI2),Os05g0494200(Oc2*),Os06g0151300(-),Os06g0…	Os01g0123900(RBBI2-2),Os01g0124000(RBBI2-1),Os01g0127600(-),Os01g0827800(OsPYL/RCAR1),Os02g0198300(-),Os02g0608600(-),Os03g0297600(OsPYL/RCAR4),Os03g0429000(-),Os04g0106000(-),Os05g0361500(OsPME17),Os05g0390600(-),Os05g0473000(OsPYL/RCAR6),Os07g0556000(CycD6),Os07g0568700(FOR1),Os08g0450200(OsPME26),Os10g0508700(-),Os12g0581800(CycA3)
GO:0003674	Molecular Function	GO:0001071	nucleic acid binding transcription factor activity	83	20	MSTRG.10517(NAC021),Os01g0165000(DREB2A),Os01g0185900(OsWRKY107),Os01g0195000(OsIDD2),Os01g0230200(OsbHLH074),Os01g0279900(OsbZIP03),Os01g0289600(OsWRKY9),Os01g0584900(OsWRKY77),Os01g0626400(WRKY11),Os01g0658900(OsBZ8),Os01g0734000(OsWRKY23),Os01g0750100(WRKY13),Os01g0808100(OsbZIP08),Os01g0812000(GAMYB),Os01g0874300(R2R3-MYB),Os01g0881500(SCL1),Os01g0922800(MADS51),Os01g0923600(CAMTA),Os01g09528…	Os01g0108600(-),Os01g0755500(OsPCF7),Os01g0976800(OsGATA10),Os02g0104500(-),Os02g0656600(OsERF#032),Os02g0671300(OsbHLH076),Os02g0695200(OsMYB58/63-L),Os05g0137500(OsWRKY5),Os05g0140100(OsMYB2P-1),Os06g0158100(OsWRKY113),Os06g0217300(OsMADS55),Os07g0605200(MADS18),Os08g0442400(AP2/EREBP#109),Os08g0481400(Oshox20),Os08g0499300(OsWRKY30),Os08g0524800(OsbHLH091),Os09g0434500(OsEREBP),Os09g0522200(Os…
GO:0003674	Molecular Function	GO:0045735	nutrient reservoir activity	2	4	Os03g0693700(OsOxO1),Os03g0693800(Osoxo4)	Os01g0952100(OsGLP1-5),Os08g0189900(GLP8-10),Os08g0190100(GLP8-11),Os08g0231400(GLP8-12)
GO:0003674	Molecular Function	GO:0005488	binding	1399	430	MSTRG.11084(--),MSTRG.11273(CLPB1),MSTRG.1359(ATJ15),MSTRG.14760(--),MSTRG.14792(SIT2),MSTRG.18365(TPS7),MSTRG.18399(ALA2),MSTRG.21469(ndhB1),MSTRG.24743(KIN14M),MSTRG.25943(SIT2),MSTRG.25977(SD25),MSTRG.26724(rpl2-A),MSTRG.27676(CAMTA2),MSTRG.27933(rpl22),MSTRG.2915(PFK7),MSTRG.30599(RPL5),MSTRG.30605(ATPA),MSTRG.30893(At2g28960),MSTRG.31133(rpl2-A),MSTRG.31615(CCR1),MSTRG.32225(RPL5),MSTRG.3222…	MSTRG.11456(ndhH),MSTRG.15038(--),MSTRG.15723(--),MSTRG.17153(LRK10L-1.5),MSTRG.18359(TPS7),MSTRG.21456(rpoA),MSTRG.24581(--),MSTRG.25061(LYK5),MSTRG.26585(--),MSTRG.30707(PBL3),MSTRG.30903(SIRK),MSTRG.30905(At1g05700),MSTRG.5087(ndhF),MSTRG.8350(--),MSTRG.9497(ndhF),Os01g0100400(-),Os01g0108600(-),Os01g0110100(Pho1),Os01g0117700(-),Os01g0130200(-),Os01g0130400(-),Os01g0132100(-),Os01g0134500(OsS…
GO:0003674	Molecular Function	GO:0005198	structural molecule activity	28	8	MSTRG.26724(rpl2-A),MSTRG.27933(rpl22),MSTRG.30599(RPL5),MSTRG.31133(rpl2-A),MSTRG.32225(RPL5),MSTRG.8796(rpl14),MSTRG.9463(RPS12),Os02g0179800(-),Os03g0214600(OsRpn9b),Os03g0227000(-),Os03g0315800(-),Os04g0690300(-),Os05g0501600(-),Os06g0146400(OsISC7),Os06g0181566(-),Os07g0201100(-),Os07g0657200(OsWD40-148),Os07g0685400(-),Os11g0174000(-),Os12g0148400(-),Os12g0165900(OsNucAP2),gene-rp12(-),gene…	Os01g0805900(OsTUB4),Os03g0105600(OsTUB2),Os03g0579300(-),Os03g0755700(-),Os05g0413200(TUB6),Os08g0234000(-),Os12g0563200(TCD11),gene-rps18(-)
GO:0005575	Cellular Component	GO:0016020	membrane	1004	337	MSTRG.13824(--),MSTRG.18399(ALA2),MSTRG.21469(ndhB1),MSTRG.2641(ABCB11),MSTRG.30605(ATPA),MSTRG.32226(NAD9),MSTRG.32231(CALS7),MSTRG.3260(atpB),MSTRG.4776(KCS1),MSTRG.6412(DTX44),MSTRG.9376(--),MSTRG.9463(RPS12),MSTRG.9467(YMF16),MSTRG.9475(atpH),Os01g0100900(SPL1),Os01g0103600(-),Os01g0104000(-),Os01g0116900(-),Os01g0121300(-),Os01g0130000(OsMTP9),Os01g0136700(-),Os01g0136800(OsWAK2),Os01g013690…	MSTRG.11456(ndhH),MSTRG.15723(--),MSTRG.3725(NAT12),MSTRG.5087(ndhF),MSTRG.7378(DTC),MSTRG.9497(ndhF),Os01g0100400(-),Os01g0103100(-),Os01g0110100(Pho1),Os01g0117700(-),Os01g0118400(-),Os01g0132100(-),Os01g0134500(OsSTE1),Os01g0138300(-),Os01g0239700(-),Os01g0247600(-),Os01g0254850(-),Os01g0329000(GPAT),Os01g0329900(OsGELP14),Os01g0349800(-),Os01g0360200(RBOHB),Os01g0364800(OsWAK7/8),Os01g0365000…
GO:0005575	Cellular Component	GO:0044425	membrane part	827	284	MSTRG.18399(ALA2),MSTRG.21469(ndhB1),MSTRG.30605(ATPA),MSTRG.32226(NAD9),MSTRG.32231(CALS7),MSTRG.3260(atpB),MSTRG.6412(DTX44),MSTRG.9463(RPS12),MSTRG.9467(YMF16),MSTRG.9475(atpH),Os01g0100900(SPL1),Os01g0103600(-),Os01g0104000(-),Os01g0116900(-),Os01g0121300(-),Os01g0130000(OsMTP9),Os01g0136700(-),Os01g0136800(OsWAK2),Os01g0136900(-),Os01g0151500(-),Os01g0152800(OsRLCK25),Os01g0161300(-),Os01g01…	MSTRG.3725(NAT12),MSTRG.5087(ndhF),MSTRG.7378(DTC),MSTRG.9497(ndhF),Os01g0103100(-),Os01g0110100(Pho1),Os01g0117700(-),Os01g0118400(-),Os01g0132100(-),Os01g0134500(OsSTE1),Os01g0138300(-),Os01g0239700(-),Os01g0247600(-),Os01g0254850(-),Os01g0329000(GPAT),Os01g0329900(OsGELP14),Os01g0349800(-),Os01g0360200(RBOHB),Os01g0364800(OsWAK7/8),Os01g0365000(-),Os01g0523100(-),Os01g0545500(OsRLCK36),Os01g06…
GO:0005575	Cellular Component	GO:0005576	extracellular region	66	64	Os01g0124200(RBBI3-1),Os01g0179400(SSG4),Os01g0267300(OsSRP-QKG),Os01g0327100(prx15),Os01g0788400(OsPME6),Os01g0794800(-),Os01g0803200(Oc1*),Os01g0850550(OsLAC7),Os01g0892600(-),Os01g0897200(OsRNS2),Os01g0974500(-),Os02g0469600(-),Os02g0534400(OSCIN1),Os02g0696500(OsXTH23),Os02g0749700(OsLAC10),Os02g0753800(ANN2),Os02g0797500(AST),Os03g0212800(Os3bglu6),Os03g0261100(PLA2-II),Os03g0318400(-),Os03g…	Os01g0123900(RBBI2-2),Os01g0124000(RBBI2-1),Os01g0127600(-),Os01g0294700(OsPOD),Os01g0326300(-),Os01g0382400(OsPR1#012),Os01g0746700(-),Os01g0823100(OsEXP2),Os01g0850700(OsLAC8),Os01g0860400(-),Os01g0860500(C10501),Os01g0892500(-),Os01g0952100(OsGLP1-5),Os02g0236800(prx26),Os02g0240100(prx30),Os02g0240300(prx29),Os03g0368900(PRX45),Os03g0429000(-),Os03g0703000(Os3bglu7),Os04g0364800(-),Os04g06881…
GO:0005575	Cellular Component	GO:0030054	cell junction	32	20	MSTRG.18399(ALA2),MSTRG.7056(Os05g0567100),Os01g0327100(prx15),Os01g0548750(-),Os01g0587300(-),Os01g0864500(OsSDS1),Os02g0105500(-),Os02g0179800(-),Os02g0274100(AIM1),Os02g0823100(OsPIP1),Os03g0218400(OsMST4),Os03g0715500(OsTVLP1),Os03g0843300(OsLEA7),Os04g0521100(OsPIP2),Os04g0559700(OsPIP1),Os04g0619600(OsRLCK161),Os04g0685300(-),Os06g0104400(-),Os06g0136000(-),Os06g0143700(OsSultr3),Os06g05672…	MSTRG.7378(DTC),Os01g0100400(-),Os01g0294700(OsPOD),Os01g0326100(RP-2),Os01g0326300(-),Os01g0358100(OsRALF-6),Os01g0769700(DRUS2),Os01g0952100(OsGLP1-5),Os03g0100020(OsTET4),Os03g0368900(PRX45),Os04g0688100(prx59),Os04g0688200(prx60),Os04g0688300(prx61),Os05g0280700(YK11),Os05g0317900(OsCrRLK1L2),Os06g0306300(prx78),Os07g0166700(-),Os07g0694300(prx116),Os08g0102700(-),Os08g0564700(-)
GO:0005575	Cellular Component	GO:0055044	symplast	30	19	Os01g0327100(prx15),Os01g0548750(-),Os01g0587300(-),Os01g0864500(OsSDS1),Os02g0105500(-),Os02g0179800(-),Os02g0274100(AIM1),Os02g0823100(OsPIP1),Os03g0218400(OsMST4),Os03g0715500(OsTVLP1),Os03g0843300(OsLEA7),Os04g0521100(OsPIP2),Os04g0559700(OsPIP1),Os04g0619600(OsRLCK161),Os04g0685300(-),Os06g0104400(-),Os06g0136000(-),Os06g0143700(OsSultr3),Os06g0567200(OsAAO1),Os07g0123700(OsWD40-136),Os07g04…	Os01g0100400(-),Os01g0294700(OsPOD),Os01g0326100(RP-2),Os01g0326300(-),Os01g0358100(OsRALF-6),Os01g0769700(DRUS2),Os01g0952100(OsGLP1-5),Os03g0100020(OsTET4),Os03g0368900(PRX45),Os04g0688100(prx59),Os04g0688200(prx60),Os04g0688300(prx61),Os05g0280700(YK11),Os05g0317900(OsCrRLK1L2),Os06g0306300(prx78),Os07g0166700(-),Os07g0694300(prx116),Os08g0102700(-),Os08g0564700(-)
GO:0005575	Cellular Component	GO:0044421	extracellular region part	15	6	Os01g0267300(OsSRP-QKG),Os01g0794800(-),Os02g0469600(-),Os04g0523500(OsCKX8),Os05g0508300(-),Os06g0144600(-),Os07g0127600(OsPR1#073),Os07g0127700(PR1b),Os08g0318500(Cen8.t01153),Os08g0556900(CP),Os09g0442300(-),Os09g0482720(-),Os10g0191300(OsPR1#101),Os10g0483500(OsCKX3),Os12g0238100(-)	Os01g0382400(OsPR1#012),Os06g0582600(-),Os07g0124900(OsPR1#071),Os07g0125500(-),Os07g0126301(-),Os09g0564000(-)
GO:0005575	Cellular Component	GO:0031012	extracellular matrix	1	0	Os02g0740700(OsMMP1)	--
GO:0005575	Cellular Component	GO:0099512	supramolecular fiber	7	4	Os01g0125800(AIP1),Os02g0274100(AIM1),Os03g0200200(-),Os03g0773600(-),Os07g0512200(Atg8),Os10g0494800(OsKTN80a),Os12g0640900(-)	Os01g0805900(OsTUB4),Os03g0105600(OsTUB2),Os03g0762900(-),Os05g0413200(TUB6)
GO:0005575	Cellular Component	GO:0044464	cell part	1418	419	MSTRG.1031(--),MSTRG.11273(CLPB1),MSTRG.1359(ATJ15),MSTRG.13824(--),MSTRG.14760(--),MSTRG.14792(SIT2),MSTRG.16908(TIC214),MSTRG.18399(ALA2),MSTRG.19587(Rv2228c),MSTRG.21297(SFH6),MSTRG.21469(ndhB1),MSTRG.24063(--),MSTRG.24100(Rv2228c),MSTRG.24228(--),MSTRG.24389(--),MSTRG.24743(KIN14M),MSTRG.25943(SIT2),MSTRG.26724(rpl2-A),MSTRG.27676(CAMTA2),MSTRG.27933(rpl22),MSTRG.28361(--),MSTRG.28363(--),MST…	MSTRG.10972(NUDT8),MSTRG.11456(ndhH),MSTRG.11540(--),MSTRG.12959(--),MSTRG.15447(--),MSTRG.15723(--),MSTRG.17868(--),MSTRG.17964(--),MSTRG.18085(--),MSTRG.18783(--),MSTRG.21456(rpoA),MSTRG.24867(--),MSTRG.24903(ALDH2C4),MSTRG.26585(--),MSTRG.28560(--),MSTRG.29101(--),MSTRG.29294(gag-pro-pol),MSTRG.30903(SIRK),MSTRG.30905(At1g05700),MSTRG.31249(--),MSTRG.3725(NAT12),MSTRG.4318(Rv2228c),MSTRG.4912(…
GO:0005575	Cellular Component	GO:0005623	cell	1432	421	MSTRG.1031(--),MSTRG.11273(CLPB1),MSTRG.1359(ATJ15),MSTRG.13824(--),MSTRG.14760(--),MSTRG.14792(SIT2),MSTRG.16908(TIC214),MSTRG.18399(ALA2),MSTRG.19587(Rv2228c),MSTRG.21297(SFH6),MSTRG.21469(ndhB1),MSTRG.24063(--),MSTRG.24100(Rv2228c),MSTRG.24228(--),MSTRG.24389(--),MSTRG.24743(KIN14M),MSTRG.25943(SIT2),MSTRG.26724(rpl2-A),MSTRG.27676(CAMTA2),MSTRG.27933(rpl22),MSTRG.28361(--),MSTRG.28363(--),MST…	MSTRG.10972(NUDT8),MSTRG.11456(ndhH),MSTRG.11540(--),MSTRG.12959(--),MSTRG.15447(--),MSTRG.15723(--),MSTRG.17868(--),MSTRG.17964(--),MSTRG.18085(--),MSTRG.18783(--),MSTRG.21456(rpoA),MSTRG.24867(--),MSTRG.24903(ALDH2C4),MSTRG.26585(--),MSTRG.28560(--),MSTRG.29101(--),MSTRG.29294(gag-pro-pol),MSTRG.30903(SIRK),MSTRG.30905(At1g05700),MSTRG.31249(--),MSTRG.3725(NAT12),MSTRG.4318(Rv2228c),MSTRG.4912(…
GO:0005575	Cellular Component	GO:0044422	organelle part	382	86	MSTRG.11273(CLPB1),MSTRG.13824(--),MSTRG.18399(ALA2),MSTRG.21469(ndhB1),MSTRG.24743(KIN14M),MSTRG.26724(rpl2-A),MSTRG.27933(rpl22),MSTRG.30599(RPL5),MSTRG.30605(ATPA),MSTRG.31133(rpl2-A),MSTRG.32225(RPL5),MSTRG.32226(NAD9),MSTRG.3260(atpB),MSTRG.6412(DTX44),MSTRG.8112(--),MSTRG.8796(rpl14),MSTRG.9463(RPS12),MSTRG.9475(atpH),Os01g0100900(SPL1),Os01g0103600(-),Os01g0118000(-),Os01g0125800(AIP1),Os0…	MSTRG.11456(ndhH),MSTRG.5087(ndhF),MSTRG.7378(DTC),MSTRG.9497(ndhF),Os01g0108600(-),Os01g0110100(Pho1),Os01g0134500(OsSTE1),Os01g0544450(OsMCM4),Os01g0704100(NRT2.3),Os01g0720500(Lhcb1.1),Os01g0750300(OsCesA4),Os01g0763700(-),Os01g0805900(OsTUB4),Os01g0858500(-),Os01g0869800(PSBS1),Os01g0882500(-),Os01g0902100(OsABCC2),Os01g0929100(-),Os01g0956600(-),Os02g0110200(HPL3),Os02g0110600(-),Os02g027310…
GO:0005575	Cellular Component	GO:0031974	membrane-enclosed lumen	68	10	Os01g0174900(OsGRX1),Os01g0179400(SSG4),Os01g0184900(BIP104),Os01g0191500(-),Os01g0390300(-),Os01g0909500(-),Os01g0925700(-),Os02g0105200(-),Os02g0122800(-),Os02g0134300(OsTEF1),Os02g0194100(-),Os02g0232400(-),Os02g0293500(-),Os02g0319100(-),Os02g0530600(OsEnS-38),Os02g0551900(-),Os02g0598800(-),Os02g0719800(-),Os02g0732700(OsMed23_1),Os03g0115200(-),Os03g0262300(-),Os03g0352400(OsNug2),Os03g0641…	Os01g0858500(-),Os01g0956600(-),Os05g0223200(-),Os07g0517300(-),Os07g0645200(-),Os07g0659500(-),Os08g0466050(-),Os09g0252000(-),Os12g0530000(-),Os12g0548100(-)
GO:0005575	Cellular Component	GO:0032991	macromolecular complex	268	49	MSTRG.24743(KIN14M),MSTRG.26724(rpl2-A),MSTRG.27733(--),MSTRG.27933(rpl22),MSTRG.30599(RPL5),MSTRG.30605(ATPA),MSTRG.31133(rpl2-A),MSTRG.32225(RPL5),MSTRG.3260(atpB),MSTRG.6098(--),MSTRG.8112(--),MSTRG.8796(rpl14),MSTRG.9463(RPS12),MSTRG.9475(atpH),Os01g0148050(-),Os01g0184900(BIP104),Os01g0191500(-),Os01g0198000(OsRDR4),Os01g0369000(OsCUL1-1),Os01g0383100(OsEXO70FX7),Os01g0390300(-),Os01g0533000…	Os01g0108600(-),Os01g0544450(OsMCM4),Os01g0720500(Lhcb1.1),Os01g0763700(-),Os01g0786700(-),Os01g0858500(-),Os01g0869800(PSBS1),Os01g0905200(OsEXO70FX15),Os01g0956600(-),Os01g0974701(-),Os02g0578400(-),Os02g0608600(-),Os02g0744000(-),Os02g0797400(OsMCM5),Os03g0131900(OscpSRP43),Os03g0579300(-),Os03g0659266(-),Os03g0699400(-),Os03g0755700(-),Os03g0765900(-),Os03g0856500(-),Os04g0450800(RH3.2A),Os04…
GO:0005575	Cellular Component	GO:0043226	organelle	945	241	MSTRG.1031(--),MSTRG.11273(CLPB1),MSTRG.13824(--),MSTRG.14760(--),MSTRG.14792(SIT2),MSTRG.16908(TIC214),MSTRG.18399(ALA2),MSTRG.19587(Rv2228c),MSTRG.21469(ndhB1),MSTRG.24063(--),MSTRG.24100(Rv2228c),MSTRG.24228(--),MSTRG.24389(--),MSTRG.24743(KIN14M),MSTRG.25943(SIT2),MSTRG.26724(rpl2-A),MSTRG.27676(CAMTA2),MSTRG.27933(rpl22),MSTRG.28361(--),MSTRG.28363(--),MSTRG.30299(--),MSTRG.30599(RPL5),MSTRG…	MSTRG.11456(ndhH),MSTRG.11540(--),MSTRG.12959(--),MSTRG.15447(--),MSTRG.15723(--),MSTRG.17868(--),MSTRG.17964(--),MSTRG.18085(--),MSTRG.18783(--),MSTRG.21456(rpoA),MSTRG.24867(--),MSTRG.26585(--),MSTRG.28560(--),MSTRG.29101(--),MSTRG.29294(gag-pro-pol),MSTRG.30903(SIRK),MSTRG.30905(At1g05700),MSTRG.31249(--),MSTRG.4318(Rv2228c),MSTRG.4912(--),MSTRG.5051(--),MSTRG.5074(--),MSTRG.5087(ndhF),MSTRG.7…

## Sheet:  zj-esb-vs-zj-esc
All enrichment GO terms of mRNAs of the comparison between zj-esb and zj-esc.
GO ID (level1)	GO Term (level1)	GO ID (level2)	GO Term (level2)	number_of_Pir1b-vs-Pir1c (up)	number_of_Pir1b-vs-Pir1c (down)	Genes_of_Pir1b-vs-Pir1c_up	Genes_of_Pir1b-vs-Pir1c_down
GO:0008150	Biological Process	GO:0098754	detoxification	2	5	Os04g0556000(HMA5),Os11g0112200(PRX131)	Os01g0360200(RBOHB),Os04g0688500(prx62),Os05g0528000(rbohC),Os07g0677200(POX22.3),Os07g0677500(POX3006)
GO:0008150	Biological Process	GO:0044699	single-organism process	74	63	Os01g0151500(-),Os01g0209700(OsGA2ox7),Os01g0546400(FCO6),Os01g0566500(OsCCD8a),Os01g0699600(OsNPK1-PK),Os01g0832600(-),Os01g0851100(-),Os01g0874300(R2R3-MYB),Os01g0945600(OsBAT5),Os02g0184900(-),Os02g0185200(-),Os02g0218700(HPL2),Os02g0575900(OsEXO70FX6),Os02g0590400(-),Os02g0624300(OsMYB30),Os02g0640500(SIT1),Os02g0666700(-),Os02g0689900(OsNRT1.5A),Os02g0725300(OsCslE2),Os02g0809800(Pho1),Os03g…	MSTRG.31256(At5g57480),Os01g0238500(-),Os01g0360200(RBOHB),Os01g0623500(-),Os01g0716800(-),Os01g0848200(P5CS2),Os02g0110200(HPL3),Os02g0111600(OsWAK11),Os02g0126400(CDPK4),Os02g0220400(CGA1),Os02g0245800(KAT3),Os02g0280500(OsGLYI2),Os02g0301100(OsSWEET4),Os02g0581000(-),Os02g0646500(OS-ALDH),Os02g0731900(-),Os03g0178200(-),Os03g0181500(ONI1),Os03g0188100(OsMATE1),Os03g0717000(OsTMK),Os03g0797400(…
GO:0008150	Biological Process	GO:0050896	response to stimulus	19	30	Os01g0187900(-),Os01g0209700(OsGA2ox7),Os01g0699600(OsNPK1-PK),Os02g0640500(SIT1),Os02g0689900(OsNRT1.5A),Os02g0809800(Pho1),Os03g0171900(-),Os04g0556000(HMA5),Os05g0100700(OsRLCK175),Os07g0485100(-),Os08g0539700(Pib-H8),Os09g0473400(-),Os09g0562600(WAK92),Os10g0190900(-),Os10g0467900(-),Os10g0478000(G1L5),Os11g0112200(PRX131),Os11g0213800(-),Os12g0608900(-)	MSTRG.31256(At5g57480),Os01g0360200(RBOHB),Os01g0508500(RH2),Os01g0869800(PSBS1),Os02g0110200(HPL3),Os02g0111600(OsWAK11),Os02g0126400(CDPK4),Os02g0220400(CGA1),Os03g0181500(ONI1),Os03g0188100(OsMATE1),Os03g0717000(OsTMK),Os03g0787300(OsDjA5),Os04g0598900(OsWAK50),Os04g0688500(prx62),Os05g0102000(OsJMT1),Os05g0382600(OsANN3),Os05g0528000(rbohC),Os06g0185966(-),Os06g0493600(Pho1),Os07g0529600(OsDR…
GO:0008150	Biological Process	GO:0040011	locomotion	0	1	--	Os11g0524300(-)
GO:0008150	Biological Process	GO:0051179	localization	25	14	Os01g0546400(FCO6),Os01g0945600(OsBAT5),Os02g0575900(OsEXO70FX6),Os02g0666700(-),Os02g0689900(OsNRT1.5A),Os02g0809800(Pho1),Os03g0138700(-),Os03g0216700(OsFRDL1),Os03g0594400(OsMST2),Os04g0435100(OsBAT7),Os04g0556000(HMA5),Os04g0588700(OsABCC7),Os05g0237800(OsLHT8),Os05g0410900(-),Os06g0143700(OsSultr3),Os06g0210000(-),Os06g0264500(-),Os08g0101500(OsSultr5),Os08g0398300(OsABCA4),Os10g0190900(-),O…	Os02g0245800(KAT3),Os02g0301100(OsSWEET4),Os03g0188100(OsMATE1),Os05g0409500(OsUMAMIT9),Os06g0493600(Pho1),Os06g0701600(OsHKT9),Os07g0288700(OsABCG17),Os07g0561800(-),Os08g0206400(OsHAK12),Os10g0513200(NIP3),Os11g0197400(-),Os11g0524300(-),Os12g0115500(OsLTP1.20),Os12g0503000(OsUPS1)
GO:0008150	Biological Process	GO:0048511	rhythmic process	0	1	--	Os01g0971800(OsPCL1)
GO:0008150	Biological Process	GO:0051704	multi-organism process	4	3	Os02g0640500(SIT1),Os04g0631800(OsRLCK162),Os11g0133001(-),Os12g0608900(-)	Os01g0508500(RH2),Os09g0339000(-),Os11g0524300(-)
GO:0008150	Biological Process	GO:0023052	signaling	7	8	Os01g0699600(OsNPK1-PK),Os02g0640500(SIT1),Os02g0809800(Pho1),Os05g0100700(OsRLCK175),Os09g0562600(WAK92),Os10g0467900(-),Os12g0608900(-)	Os02g0111600(OsWAK11),Os02g0126400(CDPK4),Os03g0717000(OsTMK),Os04g0598900(OsWAK50),Os06g0185966(-),Os08g0441100(OsCIPK06),Os09g0339000(-),Os09g0471500(OsWAK82)
GO:0008150	Biological Process	GO:0008152	metabolic process	82	84	MSTRG.27933(rpl22),MSTRG.32149(--),Os01g0115500(OsRLCK10),Os01g0151500(-),Os01g0209700(OsGA2ox7),Os01g0231700(-),Os01g0566500(OsCCD8a),Os01g0699600(OsNPK1-PK),Os01g0832600(-),Os01g0851100(-),Os01g0874300(R2R3-MYB),Os01g0946700(OsGLN1),Os02g0184900(-),Os02g0185200(-),Os02g0218700(HPL2),Os02g0590400(-),Os02g0624300(OsMYB30),Os02g0640500(SIT1),Os02g0654700(ERF91),Os02g0666700(-),Os02g0725300(OsCslE2…	MSTRG.17045(--),MSTRG.31256(At5g57480),MSTRG.6004(B'ALPHA),Os01g0108600(-),Os01g0238500(-),Os01g0360200(RBOHB),Os01g0508000(Os1bglu1),Os01g0713200(Gns10),Os01g0716800(-),Os01g0769700(DRUS2),Os01g0795400(Hwi2),Os01g0848200(P5CS2),Os01g0855000(GPAT),Os01g0860500(C10501),Os01g0869800(PSBS1),Os01g0879400(-),Os01g0892800(OsSTA40),Os01g0920300(-),Os01g0971800(OsPCL1),Os02g0110200(HPL3),Os02g0111600(OsW…
GO:0008150	Biological Process	GO:0002376	immune system process	0	1	--	Os01g0508500(RH2)
GO:0008150	Biological Process	GO:0032501	multicellular organismal process	5	4	Os04g0631800(OsRLCK162),Os05g0324700(-),Os10g0478000(G1L5),Os11g0133001(-),Os11g0289700(-)	Os02g0220400(CGA1),Os04g0282400(-),Os06g0696600(OsXTH12),Os09g0457100(OsABA8OX3)
GO:0008150	Biological Process	GO:0022414	reproductive process	3	2	Os04g0631800(OsRLCK162),Os05g0324700(-),Os11g0133001(-)	Os02g0220400(CGA1),Os04g0282400(-)
GO:0008150	Biological Process	GO:0000003	reproduction	3	2	Os04g0631800(OsRLCK162),Os05g0324700(-),Os11g0133001(-)	Os02g0220400(CGA1),Os04g0282400(-)
GO:0008150	Biological Process	GO:0032502	developmental process	5	5	Os01g0874300(R2R3-MYB),Os02g0624300(OsMYB30),Os05g0324700(-),Os10g0478000(G1L5),Os11g0289700(-)	Os02g0220400(CGA1),Os04g0282400(-),Os06g0696600(OsXTH12),Os09g0457100(OsABA8OX3),Os11g0180900(-)
GO:0008150	Biological Process	GO:0009987	cellular process	86	85	MSTRG.32149(--),Os01g0115500(OsRLCK10),Os01g0151500(-),Os01g0209700(OsGA2ox7),Os01g0231700(-),Os01g0389700(-),Os01g0546400(FCO6),Os01g0566500(OsCCD8a),Os01g0681100(OsDRP1B),Os01g0699600(OsNPK1-PK),Os01g0874300(R2R3-MYB),Os01g0945600(OsBAT5),Os02g0218700(HPL2),Os02g0575900(OsEXO70FX6),Os02g0624300(OsMYB30),Os02g0640500(SIT1),Os02g0654700(ERF91),Os02g0666700(-),Os02g0689900(OsNRT1.5A),Os02g0725300(…	MSTRG.17045(--),MSTRG.31256(At5g57480),MSTRG.6004(B'ALPHA),Os01g0108600(-),Os01g0238500(-),Os01g0360200(RBOHB),Os01g0623500(-),Os01g0716800(-),Os01g0769700(DRUS2),Os01g0848200(P5CS2),Os01g0855000(GPAT),Os01g0869800(PSBS1),Os01g0892500(-),Os01g0892800(OsSTA40),Os01g0920300(-),Os01g0971800(OsPCL1),Os02g0110200(HPL3),Os02g0111600(OsWAK11),Os02g0126400(CDPK4),Os02g0220400(CGA1),Os02g0245800(KAT3),Os0…
GO:0008150	Biological Process	GO:0048519	negative regulation of biological process	4	1	MSTRG.32149(--),Os02g0640500(SIT1),Os04g0684900(OsCAF1B),Os07g0568200(-)	MSTRG.17045(--)
GO:0008150	Biological Process	GO:0065007	biological regulation	26	22	MSTRG.32149(--),Os01g0699600(OsNPK1-PK),Os01g0874300(R2R3-MYB),Os02g0624300(OsMYB30),Os02g0640500(SIT1),Os02g0654700(ERF91),Os02g0809800(Pho1),Os03g0327800(NAC58),Os03g0777000(ONAC066),Os04g0475600(-),Os04g0684900(OsCAF1B),Os05g0100700(OsRLCK175),Os05g0325200(-),Os05g0474800(OsWRKY70),Os05g0549800(AP2/EREBP#096),Os06g0166400(OsERF#007),Os06g0264500(-),Os06g0675600(OsY37),Os07g0568200(-),Os09g0344…	MSTRG.17045(--),MSTRG.6004(B'ALPHA),Os01g0108600(-),Os01g0508500(RH2),Os01g0971800(OsPCL1),Os02g0111600(OsWAK11),Os02g0126400(CDPK4),Os02g0220400(CGA1),Os02g0245800(KAT3),Os03g0717000(OsTMK),Os04g0282400(-),Os04g0493100(OsbHLH065),Os04g0598900(OsWAK50),Os06g0185966(-),Os07g0631900(-),Os07g0680400(WRKY47),Os08g0441100(OsCIPK06),Os09g0339000(-),Os09g0457100(OsABA8OX3),Os09g0471500(OsWAK82),Os11g018…
GO:0008150	Biological Process	GO:0050789	regulation of biological process	21	21	MSTRG.32149(--),Os01g0699600(OsNPK1-PK),Os01g0874300(R2R3-MYB),Os02g0624300(OsMYB30),Os02g0640500(SIT1),Os02g0654700(ERF91),Os02g0809800(Pho1),Os03g0327800(NAC58),Os03g0777000(ONAC066),Os04g0684900(OsCAF1B),Os05g0100700(OsRLCK175),Os05g0325200(-),Os05g0474800(OsWRKY70),Os05g0549800(AP2/EREBP#096),Os06g0166400(OsERF#007),Os06g0675600(OsY37),Os07g0568200(-),Os09g0562600(WAK92),Os10g0467900(-),Os11g…	MSTRG.17045(--),MSTRG.6004(B'ALPHA),Os01g0108600(-),Os01g0508500(RH2),Os01g0971800(OsPCL1),Os02g0111600(OsWAK11),Os02g0126400(CDPK4),Os02g0220400(CGA1),Os02g0245800(KAT3),Os03g0717000(OsTMK),Os04g0282400(-),Os04g0493100(OsbHLH065),Os04g0598900(OsWAK50),Os06g0185966(-),Os07g0631900(-),Os07g0680400(WRKY47),Os08g0441100(OsCIPK06),Os09g0339000(-),Os09g0471500(OsWAK82),Os11g0180900(-),Os11g0524300(-)
GO:0008150	Biological Process	GO:0048518	positive regulation of biological process	1	1	Os01g0699600(OsNPK1-PK)	Os04g0493100(OsbHLH065)
GO:0008150	Biological Process	GO:0071840	cellular component organization or biogenesis	6	8	Os01g0389700(-),Os01g0681100(OsDRP1B),Os02g0725300(OsCslE2),Os04g0429600(OsCslH3),Os11g0513900(-),Os12g0148400(-)	MSTRG.31256(At5g57480),Os01g0892500(-),Os02g0220400(CGA1),Os03g0178200(-),Os05g0556100(OsDRP1A),Os06g0696600(OsXTH12),Os07g0631900(-),Os11g0524300(-)
GO:0003674	Molecular Function	GO:0005215	transporter activity	24	12	Os01g0546400(FCO6),Os01g0945600(OsBAT5),Os02g0666700(-),Os02g0689900(OsNRT1.5A),Os02g0809800(Pho1),Os03g0138700(-),Os03g0216700(OsFRDL1),Os03g0594400(OsMST2),Os04g0435100(OsBAT7),Os04g0556000(HMA5),Os04g0588700(OsABCC7),Os05g0237800(OsLHT8),Os05g0410900(-),Os06g0143700(OsSultr3),Os06g0210000(-),Os06g0264500(-),Os08g0101500(OsSultr5),Os08g0398300(OsABCA4),Os10g0190900(-),Os10g0210500(OsUMAMIT15),O…	Os02g0245800(KAT3),Os02g0301100(OsSWEET4),Os03g0188100(OsMATE1),Os05g0409500(OsUMAMIT9),Os06g0493600(Pho1),Os06g0701600(OsHKT9),Os07g0288700(OsABCG17),Os07g0561800(-),Os08g0206400(OsHAK12),Os10g0513200(NIP3),Os11g0197400(-),Os12g0503000(OsUPS1)
GO:0003674	Molecular Function	GO:0003824	catalytic activity	74	85	MSTRG.12705(ART3),Os01g0115500(OsRLCK10),Os01g0151500(-),Os01g0209700(OsGA2ox7),Os01g0566500(OsCCD8a),Os01g0681100(OsDRP1B),Os01g0699600(OsNPK1-PK),Os01g0717700(-),Os01g0832600(-),Os01g0851100(-),Os01g0946700(OsGLN1),Os02g0184900(-),Os02g0185200(-),Os02g0218700(HPL2),Os02g0590400(-),Os02g0640500(SIT1),Os02g0725300(OsCslE2),Os02g0755500(-),Os02g0755900(-),Os03g0171900(-),Os03g0344300(-),Os03g03489…	MSTRG.31256(At5g57480),MSTRG.8176(--),MSTRG.9282(LOC_Os12g27220),Os01g0238500(-),Os01g0360200(RBOHB),Os01g0508000(Os1bglu1),Os01g0713200(Gns10),Os01g0716800(-),Os01g0734600(OsUGT706E1),Os01g0769700(DRUS2),Os01g0795400(Hwi2),Os01g0848200(P5CS2),Os01g0855000(GPAT),Os01g0860500(C10501),Os01g0879400(-),Os01g0892500(-),Os01g0892800(OsSTA40),Os01g0901600(OsACS6),Os01g0920300(-),Os02g0110200(HPL3),Os02g…
GO:0003674	Molecular Function	GO:0016209	antioxidant activity	1	5	Os11g0112200(PRX131)	Os01g0360200(RBOHB),Os04g0688500(prx62),Os05g0528000(rbohC),Os07g0677200(POX22.3),Os07g0677500(POX3006)
GO:0003674	Molecular Function	GO:0060089	molecular transducer activity	3	2	Os02g0640500(SIT1),Os05g0100700(OsRLCK175),Os12g0608900(-)	Os03g0717000(OsTMK),Os09g0339000(-)
GO:0003674	Molecular Function	GO:0001071	nucleic acid binding transcription factor activity	6	6	Os01g0874300(R2R3-MYB),Os02g0624300(OsMYB30),Os02g0654700(ERF91),Os05g0474800(OsWRKY70),Os05g0549800(AP2/EREBP#096),Os06g0166400(OsERF#007)	Os01g0108600(-),Os01g0971800(OsPCL1),Os02g0220400(CGA1),Os04g0493100(OsbHLH065),Os07g0680400(WRKY47),Os11g0180900(-)
GO:0003674	Molecular Function	GO:0004871	signal transducer activity	3	2	Os02g0640500(SIT1),Os05g0100700(OsRLCK175),Os12g0608900(-)	Os03g0717000(OsTMK),Os09g0339000(-)
GO:0003674	Molecular Function	GO:0045735	nutrient reservoir activity	1	0	Os08g0189600(GLP8-7)	--
GO:0003674	Molecular Function	GO:0000988	transcription factor activity, protein binding	1	0	Os07g0568200(-)	--
GO:0003674	Molecular Function	GO:0005198	structural molecule activity	4	0	MSTRG.27933(rpl22),Os01g0231700(-),Os12g0148400(-),gene-rpl22(-)	--
GO:0003674	Molecular Function	GO:0005488	binding	79	69	MSTRG.27933(rpl22),Os01g0115500(OsRLCK10),Os01g0187900(-),Os01g0209700(OsGA2ox7),Os01g0566500(OsCCD8a),Os01g0681100(OsDRP1B),Os01g0699600(OsNPK1-PK),Os01g0832600(-),Os01g0864500(OsSDS1),Os01g0874300(R2R3-MYB),Os01g0958500(-),Os02g0184900(-),Os02g0185200(-),Os02g0218700(HPL2),Os02g0593600(OsIRL2),Os02g0624300(OsMYB30),Os02g0640500(SIT1),Os02g0654700(ERF91),Os02g0809800(Pho1),Os03g0145900(-),Os03g0…	MSTRG.15038(--),MSTRG.31256(At5g57480),Os01g0108600(-),Os01g0238500(-),Os01g0360200(RBOHB),Os01g0508500(RH2),Os01g0623500(-),Os01g0769700(DRUS2),Os01g0775300(OsM1),Os01g0848200(P5CS2),Os01g0892800(OsSTA40),Os01g0901600(OsACS6),Os01g0952300(-),Os01g0971800(OsPCL1),Os02g0110200(HPL3),Os02g0111600(OsWAK11),Os02g0126400(CDPK4),Os02g0220400(CGA1),Os02g0724000(DTH2),Os02g0775600(-),Os03g0635000(-),Os03…
GO:0005575	Cellular Component	GO:0016020	membrane	70	62	Os01g0151500(-),Os01g0233000(OsDREPP1),Os01g0389700(-),Os01g0546400(FCO6),Os01g0681100(OsDRP1B),Os01g0717700(-),Os01g0864500(OsSDS1),Os01g0945600(OsBAT5),Os01g0946700(OsGLN1),Os02g0184900(-),Os02g0185200(-),Os02g0640500(SIT1),Os02g0666700(-),Os02g0689900(OsNRT1.5A),Os02g0725300(OsCslE2),Os02g0731500(-),Os02g0809800(Pho1),Os03g0138700(-),Os03g0171900(-),Os03g0216700(OsFRDL1),Os03g0363100(-),Os03g0…	MSTRG.31256(At5g57480),Os01g0186600(-),Os01g0246400(-),Os01g0262500(-),Os01g0360200(RBOHB),Os01g0713200(Gns10),Os01g0769700(DRUS2),Os01g0855000(GPAT),Os01g0869800(PSBS1),Os02g0111600(OsWAK11),Os02g0126400(CDPK4),Os02g0245800(KAT3),Os02g0301100(OsSWEET4),Os02g0581000(-),Os02g0646500(OS-ALDH),Os02g0705100(-),Os02g0731900(-),Os02g0751600(OsFKBP16-2),Os03g0137600(-),Os03g0178200(-),Os03g0181500(ONI1)…
GO:0005575	Cellular Component	GO:0044425	membrane part	58	48	Os01g0151500(-),Os01g0233000(OsDREPP1),Os01g0389700(-),Os01g0546400(FCO6),Os01g0717700(-),Os01g0864500(OsSDS1),Os01g0945600(OsBAT5),Os01g0946700(OsGLN1),Os02g0640500(SIT1),Os02g0666700(-),Os02g0689900(OsNRT1.5A),Os02g0725300(OsCslE2),Os02g0731500(-),Os02g0809800(Pho1),Os03g0138700(-),Os03g0216700(OsFRDL1),Os03g0363100(-),Os03g0594400(OsMST2),Os04g0429600(OsCslH3),Os04g0435100(OsBAT7),Os04g0556000…	Os01g0186600(-),Os01g0262500(-),Os01g0360200(RBOHB),Os01g0713200(Gns10),Os01g0769700(DRUS2),Os01g0855000(GPAT),Os01g0869800(PSBS1),Os02g0111600(OsWAK11),Os02g0245800(KAT3),Os02g0301100(OsSWEET4),Os02g0581000(-),Os02g0646500(OS-ALDH),Os02g0705100(-),Os02g0731900(-),Os03g0137600(-),Os03g0181500(ONI1),Os03g0188100(OsMATE1),Os03g0244000(-),Os03g0717000(OsTMK),Os04g0171800(-),Os04g0598900(OsWAK50),Os0…
GO:0005575	Cellular Component	GO:0005576	extracellular region	3	12	Os08g0189600(GLP8-7),Os08g0556900(CP),Os11g0112200(PRX131)	Os01g0795400(Hwi2),Os01g0860500(C10501),Os01g0892500(-),Os03g0703000(Os3bglu7),Os04g0688500(prx62),Os06g0582600(-),Os06g0696600(OsXTH12),Os07g0677200(POX22.3),Os07g0677500(POX3006),Os12g0569500(-),Os12g0583300(-),Os12g0630200(-)
GO:0005575	Cellular Component	GO:0044421	extracellular region part	1	2	Os08g0556900(CP)	Os01g0795400(Hwi2),Os06g0582600(-)
GO:0005575	Cellular Component	GO:0055044	symplast	3	2	Os01g0864500(OsSDS1),Os06g0143700(OsSultr3),Os12g0159000(-)	Os01g0769700(DRUS2),Os04g0688500(prx62)
GO:0005575	Cellular Component	GO:0030054	cell junction	3	2	Os01g0864500(OsSDS1),Os06g0143700(OsSultr3),Os12g0159000(-)	Os01g0769700(DRUS2),Os04g0688500(prx62)
GO:0005575	Cellular Component	GO:0044464	cell part	80	74	MSTRG.27933(rpl22),MSTRG.32149(--),Os01g0151500(-),Os01g0187900(-),Os01g0231700(-),Os01g0233000(OsDREPP1),Os01g0546400(FCO6),Os01g0566500(OsCCD8a),Os01g0681100(OsDRP1B),Os01g0699600(OsNPK1-PK),Os01g0851100(-),Os01g0864500(OsSDS1),Os01g0874300(R2R3-MYB),Os01g0946700(OsGLN1),Os02g0575900(OsEXO70FX6),Os02g0624300(OsMYB30),Os02g0640500(SIT1),Os02g0654700(ERF91),Os02g0666700(-),Os02g0689900(OsNRT1.5A)…	MSTRG.17045(--),MSTRG.6004(B'ALPHA),Os01g0108600(-),Os01g0238500(-),Os01g0246400(-),Os01g0360200(RBOHB),Os01g0508500(RH2),Os01g0713200(Gns10),Os01g0734600(OsUGT706E1),Os01g0769700(DRUS2),Os01g0848200(P5CS2),Os01g0869800(PSBS1),Os01g0892500(-),Os01g0971800(OsPCL1),Os02g0110200(HPL3),Os02g0111600(OsWAK11),Os02g0126400(CDPK4),Os02g0220400(CGA1),Os02g0280500(OsGLYI2),Os02g0301100(OsSWEET4),Os02g05810…
GO:0005575	Cellular Component	GO:0005623	cell	80	74	MSTRG.27933(rpl22),MSTRG.32149(--),Os01g0151500(-),Os01g0187900(-),Os01g0231700(-),Os01g0233000(OsDREPP1),Os01g0546400(FCO6),Os01g0566500(OsCCD8a),Os01g0681100(OsDRP1B),Os01g0699600(OsNPK1-PK),Os01g0851100(-),Os01g0864500(OsSDS1),Os01g0874300(R2R3-MYB),Os01g0946700(OsGLN1),Os02g0575900(OsEXO70FX6),Os02g0624300(OsMYB30),Os02g0640500(SIT1),Os02g0654700(ERF91),Os02g0666700(-),Os02g0689900(OsNRT1.5A)…	MSTRG.17045(--),MSTRG.6004(B'ALPHA),Os01g0108600(-),Os01g0238500(-),Os01g0246400(-),Os01g0360200(RBOHB),Os01g0508500(RH2),Os01g0713200(Gns10),Os01g0734600(OsUGT706E1),Os01g0769700(DRUS2),Os01g0848200(P5CS2),Os01g0869800(PSBS1),Os01g0892500(-),Os01g0971800(OsPCL1),Os02g0110200(HPL3),Os02g0111600(OsWAK11),Os02g0126400(CDPK4),Os02g0220400(CGA1),Os02g0280500(OsGLYI2),Os02g0301100(OsSWEET4),Os02g05810…
GO:0005575	Cellular Component	GO:0044422	organelle part	12	17	MSTRG.27933(rpl22),Os02g0666700(-),Os02g0725300(OsCslE2),Os02g0809800(Pho1),Os03g0171900(-),Os03g0654600(NOL),Os04g0429600(OsCslH3),Os04g0588700(OsABCC7),Os06g0568600(OsKO5),Os07g0154100(OSNCED3),Os09g0532000(SGR),gene-rpl22(-)	Os01g0108600(-),Os01g0246400(-),Os01g0869800(PSBS1),Os02g0110200(HPL3),Os02g0581000(-),Os02g0705100(-),Os02g0751600(OsFKBP16-2),Os06g0493600(Pho1),Os07g0178700(-),Os07g0178800(-),Os07g0529600(OsDR8),Os07g0631900(-),Os08g0485900(-),Os09g0426800(WSL2),Os10g0536500(-),Os11g0524300(-),Os12g0626400(PSY2)
GO:0005575	Cellular Component	GO:0043226	organelle	41	44	MSTRG.27933(rpl22),MSTRG.32149(--),Os01g0187900(-),Os01g0231700(-),Os01g0566500(OsCCD8a),Os01g0874300(R2R3-MYB),Os02g0624300(OsMYB30),Os02g0654700(ERF91),Os02g0666700(-),Os02g0725300(OsCslE2),Os02g0755500(-),Os02g0755900(-),Os02g0809800(Pho1),Os03g0171900(-),Os03g0327800(NAC58),Os03g0344300(-),Os03g0348900(OsSRFP1),Os03g0654600(NOL),Os03g0777000(ONAC066),Os04g0221300(-),Os04g0429600(OsCslH3),Os04…	MSTRG.17045(--),Os01g0108600(-),Os01g0246400(-),Os01g0508500(RH2),Os01g0734600(OsUGT706E1),Os01g0869800(PSBS1),Os01g0971800(OsPCL1),Os02g0110200(HPL3),Os02g0126400(CDPK4),Os02g0220400(CGA1),Os02g0581000(-),Os02g0705100(-),Os02g0724000(DTH2),Os02g0751600(OsFKBP16-2),Os03g0178200(-),Os03g0181500(ONI1),Os03g0635000(-),Os03g0685100(-),Os03g0797400(OsIGL),Os04g0445700(-),Os04g0493100(OsbHLH065),Os04g0…
GO:0005575	Cellular Component	GO:0032991	macromolecular complex	6	6	MSTRG.27933(rpl22),Os01g0231700(-),Os02g0575900(OsEXO70FX6),Os04g0684900(OsCAF1B),Os11g0513900(-),gene-rpl22(-)	Os01g0108600(-),Os01g0869800(PSBS1),Os07g0631900(-),Os08g0504500(-),Os10g0516100(OsGDCH),Os11g0108932(OsFbox563)

## Sheet:  ZJ22a-vs-ZJ22b
All enrichment GO terms of mRNAs of the comparison between ZJ22a and ZJ22b.
GO ID (level1)	GO Term (level1)	GO ID (level2)	GO Term (level2)	number_of_ZJ22a-vs-ZJ22b (up)	number_of_ZJ22a-vs-ZJ22b (down)	Genes_of_ZJ22a-vs-ZJ22b_up	Genes_of_ZJ22a-vs-ZJ22b_down
GO:0008150	Biological Process	GO:0051179	localization	16	34	Os01g0253300(rImpa1a),Os01g0850550(OsLAC7),Os01g0930400(HAK5),Os02g0703900(OsUMAMIT6),Os02g0823100(OsPIP1),Os03g0296800(MIT),Os04g0209300(OsABCC10),Os04g0401700(HAK1),Os04g0692000(-),Os05g0424000(OsAAP11F),Os06g0494400(-),Os07g0582400(-),Os10g0210500(OsUMAMIT15),Os10g0561300(-),Os12g0194900(OsAAP10B),Os12g0623500(OsCAT11)	Os01g0547600(NRT2.4),Os01g0609200(OsABCG35),Os01g0850700(OsLAC8),Os01g0902700(-),Os01g0919100(OsFRDL4),Os01g0952100(OsGLP1-5),Os02g0301100(OsSWEET4),Os03g0138700(-),Os03g0149300(-),Os03g0163100(-),Os03g0188100(OsMATE1),Os03g0233000(-),Os03g0819400(-),Os04g0186400(PT4),Os04g0195000(OsWD40-99),Os04g0233400(OsPIP2),Os04g0401000(PI21),Os04g0454200(-),Os04g0605500(ACA11),Os05g0127200(OsPLC4),Os05g0409…
GO:0008150	Biological Process	GO:0098754	detoxification	0	8	--	Os01g0294700(OsPOD),Os04g0602100(-),Os05g0134400(prx65),Os06g0196300(OsPrx),Os07g0657900(NTRC),Os07g0677400(POX5.1),Os10g0109300(PRX125),Os12g0448900(PIOX)
GO:0008150	Biological Process	GO:0051704	multi-organism process	2	11	Os01g0253300(rImpa1a),Os08g0508800(Lox2:Os:1)	Os01g0508500(RH2),Os01g0849000(OsLTPd5),Os02g0121700(OsTPS3),Os03g0667100(OsNPR3),Os04g0401000(PI21),Os05g0496200(OsPGK3),Os09g0417600(WRKY76),Os09g0417800(WRKY62),Os10g0555900(OsEXPB3),Os10g0556100(OsEXPB4),Os12g0448900(PIOX)
GO:0008150	Biological Process	GO:0044699	single-organism process	24	107	MSTRG.32231(CALS7),Os01g0253300(rImpa1a),Os01g0352100(-),Os01g0543600(-),Os01g0850550(OsLAC7),Os01g0930400(HAK5),Os01g0952600(-),Os02g0703900(OsUMAMIT6),Os02g0770800(OsNIA1),Os02g0823100(OsPIP1),Os03g0296800(MIT),Os04g0209300(OsABCC10),Os04g0401700(HAK1),Os04g0692000(-),Os05g0424000(OsAAP11F),Os06g0494400(-),Os07g0582400(-),Os08g0508800(Lox2:Os:1),Os10g0210500(OsUMAMIT15),Os10g0561300(-),Os11g043…	MSTRG.24927(rbcL),Os01g0238500(-),Os01g0248701(-),Os01g0294700(OsPOD),Os01g0547600(NRT2.4),Os01g0609200(OsABCG35),Os01g0639900(BETACA1),Os01g0712700(-),Os01g0793300(-),Os01g0850700(OsLAC8),Os01g0902700(-),Os01g0919100(OsFRDL4),Os01g0931400(ROX1),Os01g0952100(OsGLP1-5),Os02g0121700(OsTPS3),Os02g0167100(OsStr23),Os02g0301100(OsSWEET4),Os02g0323600(OsCYP51H4),Os02g0571100(OsCPS2),Os02g0589700(-),Os0…
GO:0008150	Biological Process	GO:0002376	immune system process	0	4	--	Os01g0508500(RH2),Os01g0849000(OsLTPd5),Os05g0496200(OsPGK3),Os12g0448900(PIOX)
GO:0008150	Biological Process	GO:0050896	response to stimulus	9	35	Os02g0643800(OsSAUR11),Os02g0823100(OsPIP1),Os05g0551900(-),Os06g0494400(-),Os08g0508800(Lox2:Os:1),Os08g0539700(Pib-H8),Os09g0482100(OsHSP82),Os11g0484500(Os6PGDH2),Os11g0703900(HSP70)	Os01g0294700(OsPOD),Os01g0508500(RH2),Os01g0547600(NRT2.4),Os01g0639900(BETACA1),Os01g0720500(Lhcb1.1),Os01g0849000(OsLTPd5),Os01g0869800(PSBS1),Os02g0121700(OsTPS3),Os02g0571100(OsCPS2),Os03g0188100(OsMATE1),Os03g0667100(OsNPR3),Os04g0195000(OsWD40-99),Os04g0233400(OsPIP2),Os04g0389800(-),Os04g0401000(PI21),Os04g0457000(CP24),Os04g0547900(-),Os04g0602100(-),Os04g0605500(ACA11),Os05g0102000(OsJMT…
GO:0008150	Biological Process	GO:0048519	negative regulation of biological process	0	7	--	MSTRG.29101(--),MSTRG.4912(--),Os01g0123900(RBBI2-2),Os01g0124000(RBBI2-1),Os05g0127200(OsPLC4),Os09g0417800(WRKY62),Os10g0508700(-)
GO:0008150	Biological Process	GO:0008152	metabolic process	29	116	MSTRG.18063(rpoC1),MSTRG.18064(rpoC2),MSTRG.32231(CALS7),MSTRG.3262(rpoC2),MSTRG.8790(clpP),Os01g0117200(OsRLCK16),Os01g0352100(-),Os01g0543600(-),Os01g0850550(OsLAC7),Os01g0940700(OsPR2),Os01g0952600(-),Os02g0770800(OsNIA1),Os03g0101100(-),Os03g0183000(OsLG3),Os03g0655600(-),Os03g0719100(SIZ2),Os05g0388500(-),Os05g0567400(-),Os07g0147500(PsbR),Os08g0508800(Lox2:Os:1),Os09g0467200(OsGSTU17),Os10g…	MSTRG.24927(rbcL),MSTRG.27946(Os04g0179200),MSTRG.29101(--),MSTRG.4912(--),Os01g0108600(-),Os01g0123900(RBBI2-2),Os01g0124000(RBBI2-1),Os01g0238500(-),Os01g0248701(-),Os01g0294700(OsPOD),Os01g0547600(NRT2.4),Os01g0639900(BETACA1),Os01g0712700(-),Os01g0720500(Lhcb1.1),Os01g0793300(-),Os01g0850700(OsLAC8),Os01g0869800(PSBS1),Os01g0931400(ROX1),Os01g0946500(-),Os02g0114200(CBP3),Os02g0121700(OsTPS3)…
GO:0008150	Biological Process	GO:0009987	cellular process	41	115	MSTRG.18063(rpoC1),MSTRG.18064(rpoC2),MSTRG.32231(CALS7),MSTRG.3262(rpoC2),MSTRG.8790(clpP),Os01g0117200(OsRLCK16),Os01g0253300(rImpa1a),Os01g0850550(OsLAC7),Os01g0930400(HAK5),Os01g0952600(-),Os02g0703900(OsUMAMIT6),Os02g0770800(OsNIA1),Os02g0823100(OsPIP1),Os03g0183000(OsLG3),Os03g0296800(MIT),Os03g0655600(-),Os03g0719100(SIZ2),Os04g0209300(OsABCC10),Os04g0401700(HAK1),Os04g0692000(-),Os05g0388…	MSTRG.24927(rbcL),MSTRG.29101(--),MSTRG.4912(--),Os01g0108600(-),Os01g0123900(RBBI2-2),Os01g0124000(RBBI2-1),Os01g0238500(-),Os01g0248701(-),Os01g0294700(OsPOD),Os01g0547600(NRT2.4),Os01g0609200(OsABCG35),Os01g0639900(BETACA1),Os01g0712700(-),Os01g0720500(Lhcb1.1),Os01g0850700(OsLAC8),Os01g0869800(PSBS1),Os01g0902700(-),Os01g0919100(OsFRDL4),Os01g0931400(ROX1),Os01g0952100(OsGLP1-5),Os02g0114200(…
GO:0008150	Biological Process	GO:0022414	reproductive process	0	2	--	Os10g0555900(OsEXPB3),Os10g0556100(OsEXPB4)
GO:0008150	Biological Process	GO:0000003	reproduction	0	2	--	Os10g0555900(OsEXPB3),Os10g0556100(OsEXPB4)
GO:0008150	Biological Process	GO:0071840	cellular component organization or biogenesis	3	14	MSTRG.32231(CALS7),Os05g0388500(-),Os05g0567400(-)	Os02g0234500(-),Os02g0697400(4CL2),Os03g0370400(-),Os03g0661300(TUB8),Os04g0195000(OsWD40-99),Os05g0176100(OsCesA1),Os06g0697000(OsXTH10),Os07g0208500(OsCesA8),Os07g0424400(OsCesA3),Os08g0160500(CSLF6),Os09g0533900(OsGH9B5),Os10g0517500(RRJ1),Os10g0555900(OsEXPB3),Os10g0556100(OsEXPB4)
GO:0008150	Biological Process	GO:0048518	positive regulation of biological process	0	2	--	Os05g0496200(OsPGK3),Os07g0657900(NTRC)
GO:0008150	Biological Process	GO:0032501	multicellular organismal process	1	2	MSTRG.32231(CALS7)	Os01g0952100(OsGLP1-5),Os02g0697400(4CL2)
GO:0008150	Biological Process	GO:0023052	signaling	0	4	--	Os03g0667100(OsNPR3),Os04g0547900(-),Os05g0127200(OsPLC4),Os05g0566400(OsMPK7)
GO:0008150	Biological Process	GO:0032502	developmental process	1	2	MSTRG.32231(CALS7)	Os01g0952100(OsGLP1-5),Os02g0697400(4CL2)
GO:0008150	Biological Process	GO:0065007	biological regulation	5	28	MSTRG.32231(CALS7),Os01g0850550(OsLAC7),Os03g0183000(OsLG3),Os03g0655600(-),Os09g0482100(OsHSP82)	MSTRG.29101(--),MSTRG.4912(--),Os01g0108600(-),Os01g0123900(RBBI2-2),Os01g0124000(RBBI2-1),Os01g0508500(RH2),Os01g0639900(BETACA1),Os01g0850700(OsLAC8),Os01g0952100(OsGLP1-5),Os03g0233000(-),Os03g0667100(OsNPR3),Os04g0118900(-),Os04g0195000(OsWD40-99),Os04g0401000(PI21),Os04g0544200(OsCYCP4),Os04g0547900(-),Os05g0127200(OsPLC4),Os05g0496200(OsPGK3),Os05g0566400(OsMPK7),Os06g0103800(-),Os06g019630…
GO:0008150	Biological Process	GO:0050789	regulation of biological process	3	25	MSTRG.32231(CALS7),Os03g0183000(OsLG3),Os03g0655600(-)	MSTRG.29101(--),MSTRG.4912(--),Os01g0108600(-),Os01g0123900(RBBI2-2),Os01g0124000(RBBI2-1),Os01g0508500(RH2),Os01g0639900(BETACA1),Os01g0952100(OsGLP1-5),Os03g0667100(OsNPR3),Os04g0118900(-),Os04g0195000(OsWD40-99),Os04g0401000(PI21),Os04g0544200(OsCYCP4),Os04g0547900(-),Os05g0127200(OsPLC4),Os05g0496200(OsPGK3),Os05g0566400(OsMPK7),Os06g0196300(OsPrx),Os07g0657900(NTRC),Os07g0684100(-),Os09g0417…
GO:0003674	Molecular Function	GO:0005215	transporter activity	15	25	Os01g0253300(rImpa1a),Os01g0930400(HAK5),Os02g0703900(OsUMAMIT6),Os02g0823100(OsPIP1),Os03g0296800(MIT),Os04g0209300(OsABCC10),Os04g0401700(HAK1),Os04g0692000(-),Os05g0424000(OsAAP11F),Os06g0494400(-),Os07g0582400(-),Os10g0210500(OsUMAMIT15),Os10g0561300(-),Os12g0194900(OsAAP10B),Os12g0623500(OsCAT11)	Os01g0547600(NRT2.4),Os01g0609200(OsABCG35),Os01g0902700(-),Os01g0919100(OsFRDL4),Os02g0301100(OsSWEET4),Os03g0138700(-),Os03g0149300(-),Os03g0188100(OsMATE1),Os03g0233000(-),Os04g0186400(PT4),Os04g0233400(OsPIP2),Os04g0454200(-),Os04g0605500(ACA11),Os05g0409500(OsUMAMIT9),Os06g0103800(-),Os06g0700700(HMA2),Os07g0523400(OsGPT2-3),Os07g0523600(OsGPT2),Os07g0523965(-),Os07g0524900(-),Os09g0426500(O…
GO:0003674	Molecular Function	GO:0003824	catalytic activity	29	121	MSTRG.18063(rpoC1),MSTRG.18064(rpoC2),MSTRG.32231(CALS7),MSTRG.3262(rpoC2),MSTRG.8790(clpP),Os01g0117200(OsRLCK16),Os01g0352100(-),Os01g0543600(-),Os01g0850550(OsLAC7),Os01g0940700(OsPR2),Os01g0952600(-),Os02g0770800(OsNIA1),Os03g0101100(-),Os03g0719100(SIZ2),Os04g0209300(OsABCC10),Os04g0321100(-),Os05g0567400(-),Os08g0404000(-),Os08g0508800(Lox2:Os:1),Os08g0543400(-),Os09g0467200(OsGSTU17),Os10g…	MSTRG.24927(rbcL),MSTRG.27946(Os04g0179200),MSTRG.9282(LOC_Os12g27220),Os01g0238500(-),Os01g0248701(-),Os01g0294700(OsPOD),Os01g0609200(OsABCG35),Os01g0609300(OsPDR9),Os01g0639900(BETACA1),Os01g0712700(-),Os01g0793300(-),Os01g0850700(OsLAC8),Os01g0901600(OsACS6),Os01g0931400(ROX1),Os01g0946500(-),Os02g0114200(CBP3),Os02g0121700(OsTPS3),Os02g0158300(OsCBSSIS1),Os02g0167100(OsStr23),Os02g0217500(-)…
GO:0003674	Molecular Function	GO:0016209	antioxidant activity	0	8	--	Os01g0294700(OsPOD),Os04g0602100(-),Os05g0134400(prx65),Os06g0196300(OsPrx),Os07g0657900(NTRC),Os07g0677400(POX5.1),Os10g0109300(PRX125),Os12g0448900(PIOX)
GO:0003674	Molecular Function	GO:0045735	nutrient reservoir activity	0	2	--	Os01g0952100(OsGLP1-5),Os03g0694000(Osoxo4)
GO:0003674	Molecular Function	GO:0005198	structural molecule activity	4	1	MSTRG.8790(clpP),Os05g0388500(-),gene-rpl2-2(-),gene-rps2-2(-)	Os03g0661300(TUB8)
GO:0003674	Molecular Function	GO:0098772	molecular function regulator	0	4	--	Os01g0123900(RBBI2-2),Os01g0124000(RBBI2-1),Os07g0657900(NTRC),Os10g0508700(-)
GO:0003674	Molecular Function	GO:0001071	nucleic acid binding transcription factor activity	1	6	Os03g0183000(OsLG3)	Os01g0108600(-),Os03g0151300(JMJ701),Os09g0417600(WRKY76),Os09g0417800(WRKY62),Os09g0501600(OsbHLH092),Os12g0116400(OsWRKY97)
GO:0003674	Molecular Function	GO:0004871	signal transducer activity	0	1	--	Os05g0566400(OsMPK7)
GO:0003674	Molecular Function	GO:0005488	binding	33	95	MSTRG.18063(rpoC1),MSTRG.18064(rpoC2),MSTRG.32231(CALS7),MSTRG.3262(rpoC2),MSTRG.8790(clpP),Os01g0117200(OsRLCK16),Os01g0253300(rImpa1a),Os01g0352100(-),Os01g0543600(-),Os01g0850550(OsLAC7),Os01g0952600(-),Os02g0770800(OsNIA1),Os03g0183000(OsLG3),Os03g0655600(-),Os03g0698800(OsC3H24),Os03g0719100(SIZ2),Os04g0209300(OsABCC10),Os04g0449900(-),Os05g0388500(-),Os05g0551900(-),Os06g0267900(-),Os08g046…	MSTRG.24927(rbcL),Os01g0108600(-),Os01g0238500(-),Os01g0294700(OsPOD),Os01g0508500(RH2),Os01g0609200(OsABCG35),Os01g0609300(OsPDR9),Os01g0639900(BETACA1),Os01g0705700(OsICE1),Os01g0712700(-),Os01g0720500(Lhcb1.1),Os01g0793300(-),Os01g0849000(OsLTPd5),Os01g0850700(OsLAC8),Os01g0901600(OsACS6),Os01g0931400(ROX1),Os01g0952100(OsGLP1-5),Os02g0121700(OsTPS3),Os02g0155400(-),Os02g0158300(OsCBSSIS1),Os0…
GO:0005575	Cellular Component	GO:0005576	extracellular region	2	18	Os01g0382000(OsPR1b),Os01g0850550(OsLAC7)	Os01g0123900(RBBI2-2),Os01g0124000(RBBI2-1),Os01g0294700(OsPOD),Os01g0850700(OsLAC8),Os01g0952100(OsGLP1-5),Os03g0661300(TUB8),Os03g0694000(Osoxo4),Os05g0134400(prx65),Os06g0573600(OsBgal2),Os06g0697000(OsXTH10),Os07g0677400(POX5.1),Os08g0434100(OsRNS3),Os09g0533900(OsGH9B5),Os10g0109300(PRX125),Os10g0555900(OsEXPB3),Os10g0556100(OsEXPB4),Os12g0247700(OsJAC1),Os12g0569500(-)
GO:0005575	Cellular Component	GO:0055044	symplast	1	7	Os02g0823100(OsPIP1)	Os01g0294700(OsPOD),Os01g0952100(OsGLP1-5),Os03g0661300(TUB8),Os04g0233400(OsPIP2),Os05g0122800(OsTET7),Os05g0134400(prx65),Os08g0102700(-)
GO:0005575	Cellular Component	GO:0030054	cell junction	1	7	Os02g0823100(OsPIP1)	Os01g0294700(OsPOD),Os01g0952100(OsGLP1-5),Os03g0661300(TUB8),Os04g0233400(OsPIP2),Os05g0122800(OsTET7),Os05g0134400(prx65),Os08g0102700(-)
GO:0005575	Cellular Component	GO:0016020	membrane	27	76	MSTRG.32231(CALS7),Os01g0543600(-),Os01g0678100(-),Os01g0850550(OsLAC7),Os01g0930400(HAK5),Os01g0940700(OsPR2),Os02g0703900(OsUMAMIT6),Os02g0823100(OsPIP1),Os03g0296800(MIT),Os03g0682100(OsMFS1),Os04g0209300(OsABCC10),Os04g0401700(HAK1),Os04g0692000(-),Os05g0388500(-),Os05g0424000(OsAAP11F),Os05g0591900(-),Os06g0494400(-),Os07g0147500(PsbR),Os07g0178700(-),Os07g0178800(-),Os07g0204100(-),Os07g058…	Os01g0547600(NRT2.4),Os01g0609200(OsABCG35),Os01g0609300(OsPDR9),Os01g0720500(Lhcb1.1),Os01g0850700(OsLAC8),Os01g0869800(PSBS1),Os01g0902700(-),Os01g0919100(OsFRDL4),Os01g0946500(-),Os02g0155400(-),Os02g0198000(-),Os02g0301100(OsSWEET4),Os02g0323600(OsCYP51H4),Os02g0607700(-),Os02g0692000(-),Os02g0716500(OsFAD2),Os02g0771700(Gns9),Os03g0128000(OsFLA2),Os03g0138700(-),Os03g0140100(MAH1),Os03g01493…
GO:0005575	Cellular Component	GO:0044425	membrane part	21	63	MSTRG.32231(CALS7),Os01g0678100(-),Os01g0930400(HAK5),Os01g0940700(OsPR2),Os02g0703900(OsUMAMIT6),Os02g0823100(OsPIP1),Os03g0296800(MIT),Os03g0682100(OsMFS1),Os04g0209300(OsABCC10),Os04g0401700(HAK1),Os04g0692000(-),Os05g0424000(OsAAP11F),Os05g0591900(-),Os06g0494400(-),Os07g0147500(PsbR),Os07g0204100(-),Os07g0582400(-),Os10g0210500(OsUMAMIT15),Os10g0561300(-),Os12g0194900(OsAAP10B),Os12g0623500(…	Os01g0547600(NRT2.4),Os01g0609200(OsABCG35),Os01g0609300(OsPDR9),Os01g0720500(Lhcb1.1),Os01g0869800(PSBS1),Os01g0902700(-),Os01g0946500(-),Os02g0155400(-),Os02g0198000(-),Os02g0301100(OsSWEET4),Os02g0692000(-),Os02g0716500(OsFAD2),Os02g0771700(Gns9),Os03g0128000(OsFLA2),Os03g0138700(-),Os03g0140100(MAH1),Os03g0149300(-),Os03g0163100(-),Os03g0188100(OsMATE1),Os03g0244000(-),Os03g0370400(-),Os03g07…
GO:0005575	Cellular Component	GO:0005623	cell	44	109	MSTRG.18063(rpoC1),MSTRG.18064(rpoC2),MSTRG.32231(CALS7),MSTRG.3262(rpoC2),MSTRG.3271(--),MSTRG.8790(clpP),Os01g0253300(rImpa1a),Os01g0678100(-),Os01g0850550(OsLAC7),Os01g0940700(OsPR2),Os01g0952600(-),Os02g0703900(OsUMAMIT6),Os02g0770800(OsNIA1),Os02g0823100(OsPIP1),Os03g0101100(-),Os03g0183000(OsLG3),Os03g0719100(SIZ2),Os04g0209300(OsABCC10),Os04g0321100(-),Os04g0449900(-),Os04g0692000(-),Os05g…	MSTRG.24927(rbcL),MSTRG.29101(--),MSTRG.4912(--),Os01g0108600(-),Os01g0207400(-),Os01g0238500(-),Os01g0294700(OsPOD),Os01g0508500(RH2),Os01g0547600(NRT2.4),Os01g0609200(OsABCG35),Os01g0639900(BETACA1),Os01g0712700(-),Os01g0720500(Lhcb1.1),Os01g0850700(OsLAC8),Os01g0869800(PSBS1),Os01g0931400(ROX1),Os01g0946500(-),Os01g0952100(OsGLP1-5),Os02g0114200(CBP3),Os02g0121700(OsTPS3),Os02g0155400(-),Os02g…
GO:0005575	Cellular Component	GO:0044464	cell part	44	107	MSTRG.18063(rpoC1),MSTRG.18064(rpoC2),MSTRG.32231(CALS7),MSTRG.3262(rpoC2),MSTRG.3271(--),MSTRG.8790(clpP),Os01g0253300(rImpa1a),Os01g0678100(-),Os01g0850550(OsLAC7),Os01g0940700(OsPR2),Os01g0952600(-),Os02g0703900(OsUMAMIT6),Os02g0770800(OsNIA1),Os02g0823100(OsPIP1),Os03g0101100(-),Os03g0183000(OsLG3),Os03g0719100(SIZ2),Os04g0209300(OsABCC10),Os04g0321100(-),Os04g0449900(-),Os04g0692000(-),Os05g…	MSTRG.24927(rbcL),MSTRG.29101(--),MSTRG.4912(--),Os01g0108600(-),Os01g0207400(-),Os01g0238500(-),Os01g0294700(OsPOD),Os01g0508500(RH2),Os01g0547600(NRT2.4),Os01g0609200(OsABCG35),Os01g0639900(BETACA1),Os01g0712700(-),Os01g0720500(Lhcb1.1),Os01g0850700(OsLAC8),Os01g0869800(PSBS1),Os01g0931400(ROX1),Os01g0946500(-),Os01g0952100(OsGLP1-5),Os02g0114200(CBP3),Os02g0121700(OsTPS3),Os02g0155400(-),Os02g…
GO:0005575	Cellular Component	GO:0099512	supramolecular fiber	0	1	--	Os03g0661300(TUB8)
GO:0005575	Cellular Component	GO:0044421	extracellular region part	1	0	Os01g0382000(OsPR1b)	--
GO:0005575	Cellular Component	GO:0031974	membrane-enclosed lumen	2	4	Os01g0253300(rImpa1a),Os05g0567400(-)	Os02g0217500(-),Os03g0151300(JMJ701),Os04g0118900(-),Os05g0223200(-)
GO:0005575	Cellular Component	GO:0043226	organelle	29	65	MSTRG.18063(rpoC1),MSTRG.18064(rpoC2),MSTRG.32231(CALS7),MSTRG.3262(rpoC2),MSTRG.3271(--),MSTRG.8790(clpP),Os01g0253300(rImpa1a),Os01g0678100(-),Os01g0952600(-),Os02g0823100(OsPIP1),Os03g0101100(-),Os03g0183000(OsLG3),Os03g0719100(SIZ2),Os04g0209300(OsABCC10),Os04g0321100(-),Os04g0692000(-),Os05g0388500(-),Os05g0551900(-),Os05g0567400(-),Os06g0699500(-),Os07g0178700(-),Os07g0178800(-),Os08g040400…	MSTRG.24927(rbcL),MSTRG.29101(--),MSTRG.4912(--),Os01g0108600(-),Os01g0207400(-),Os01g0508500(RH2),Os01g0547600(NRT2.4),Os01g0720500(Lhcb1.1),Os01g0869800(PSBS1),Os02g0114200(CBP3),Os02g0121700(OsTPS3),Os02g0167100(OsStr23),Os02g0217500(-),Os02g0234500(-),Os02g0323600(OsCYP51H4),Os02g0529900(-),Os02g0571100(OsCPS2),Os02g0589400(UGT),Os03g0151300(JMJ701),Os03g0233000(-),Os03g0661300(TUB8),Os03g066…
GO:0005575	Cellular Component	GO:0044422	organelle part	8	23	MSTRG.8790(clpP),Os01g0253300(rImpa1a),Os04g0209300(OsABCC10),Os05g0388500(-),Os05g0567400(-),Os07g0178700(-),Os07g0178800(-),gene-rps2-2(-)	Os01g0108600(-),Os01g0547600(NRT2.4),Os01g0720500(Lhcb1.1),Os01g0869800(PSBS1),Os02g0217500(-),Os02g0234500(-),Os03g0151300(JMJ701),Os03g0661300(TUB8),Os04g0118900(-),Os04g0406600(-),Os04g0457000(CP24),Os04g0602100(-),Os05g0176100(OsCesA1),Os05g0223200(-),Os05g0408900(CLA1),Os06g0196300(OsPrx),Os07g0208500(OsCesA8),Os07g0424400(OsCesA3),Os07g0626800(-),Os07g0657900(NTRC),Os08g0160500(CSLF6),Os10g…
GO:0005575	Cellular Component	GO:0032991	macromolecular complex	8	11	MSTRG.8790(clpP),Os01g0952600(-),Os05g0388500(-),Os05g0567400(-),Os07g0147500(PsbR),Os09g0482100(OsHSP82),gene-rpl2-2(-),gene-rps2-2(-)	Os01g0108600(-),Os01g0720500(Lhcb1.1),Os01g0869800(PSBS1),Os02g0217500(-),Os03g0151300(JMJ701),Os03g0765900(-),Os04g0118900(-),Os04g0195000(OsWD40-99),Os04g0457000(CP24),Os05g0223200(-),Os10g0516100(OsGDCH)

## Sheet:  ZJ22a-vs-ZJ22c
All enrichment GO terms of mRNAs of the comparison between ZJ22a and ZJ22c.
GO ID (level1)	GO Term (level1)	GO ID (level2)	GO Term (level2)	number_of_ZJ22a-vs-ZJ22c (up)	number_of_ZJ22a-vs-ZJ22c (down)	Genes_of_ZJ22a-vs-ZJ22c_up	Genes_of_ZJ22a-vs-ZJ22c_down
GO:0008150	Biological Process	GO:0098754	detoxification	5	10	Os04g0688500(prx62),Os06g0196900(-),Os07g0676900(prx109),Os08g0113000(prx117),Os12g0178100(OsAPx6)	Os01g0172600(-),Os01g0294700(OsPOD),Os01g0835500(rbohE),Os02g0129800(-),Os02g0192700(Pre),Os02g0240300(prx29),Os02g0553200(APX8),Os04g0602100(-),Os10g0109300(PRX125),Os12g0448900(PIOX)
GO:0008150	Biological Process	GO:0051179	localization	48	50	MSTRG.20157(atpH),MSTRG.30597(COX1),MSTRG.3260(atpB),MSTRG.9475(atpH),Os01g0229200(-),Os01g0253300(rImpa1a),Os01g0504500(-),Os01g0746200(NUP85),Os01g0850550(OsLAC7),Os01g0930400(HAK5),Os01g0973300(-),Os02g0703900(OsUMAMIT6),Os02g0787600(OsGLR1.2),Os02g0823100(OsPIP1),Os03g0197200(-),Os03g0296800(MIT),Os03g0616700(-),Os03g0644400(OsProT),Os03g0711400(OsWD40-84),Os03g0787000(-),Os03g0811900(OsARFA1…	Os01g0110100(Pho1),Os01g0239200(OsTPT1),Os01g0547600(NRT2.4),Os01g0609200(OsABCG35),Os01g0695700(OsABCB4),Os01g0706700(-),Os01g0850700(OsLAC8),Os01g0902700(-),Os01g0952100(OsGLP1-5),Os02g0102200(OsAAP7C),Os02g0116400(OsYSL8),Os02g0117500(OsGLR3.1),Os02g0301100(OsSWEET4),Os02g0318450(-),Os02g0716800(OsNRT1.5B),Os02g0730300(OsHAK25),Os02g0745100(LSI1),Os02g0750100(-),Os02g0775100(MTP8.2),Os03g01493…
GO:0008150	Biological Process	GO:0044699	single-organism process	112	177	MSTRG.20157(atpH),MSTRG.30597(COX1),MSTRG.30599(RPL5),MSTRG.32231(CALS7),MSTRG.3260(atpB),MSTRG.9475(atpH),Os01g0182600(GI),Os01g0185200(-),Os01g0200700(OsMT3a),Os01g0253300(rImpa1a),Os01g0286100(PIL15),Os01g0352100(-),Os01g0504500(-),Os01g0543600(-),Os01g0627800(-),Os01g0655500(-),Os01g0746200(NUP85),Os01g0796400(-),Os01g0850550(OsLAC7),Os01g0883800(20ox2),Os01g0930400(HAK5),Os01g0973300(-),Os02…	MSTRG.24927(rbcL),MSTRG.27298(OCT2),Os01g0110100(Pho1),Os01g0172600(-),Os01g0227800(-),Os01g0238500(-),Os01g0239200(OsTPT1),Os01g0294700(OsPOD),Os01g0332100(OsNIN2),Os01g0547600(NRT2.4),Os01g0591000(ALDH1A),Os01g0602800(OsRLCK42),Os01g0609200(OsABCG35),Os01g0639900(BETACA1),Os01g0695700(OsABCB4),Os01g0706700(-),Os01g0775100(-),Os01g0784700(-),Os01g0793300(-),Os01g0825900(-),Os01g0835500(rbohE),Os…
GO:0008150	Biological Process	GO:0050896	response to stimulus	40	71	Os01g0182600(GI),Os01g0286100(PIL15),Os01g0504500(-),Os01g0746200(NUP85),Os01g0883800(20ox2),Os02g0823100(OsPIP1),Os03g0108600(OsRH50),Os03g0237100(OsDMAS1),Os03g0297600(OsPYL/RCAR4),Os03g0315400(OsMYB2),Os03g0648400(OsDjA4),Os03g0773300(-),Os04g0373400(-),Os04g0637000(OsTGAP1),Os04g0688500(prx62),Os05g0421900(GA20OX4),Os05g0473000(OsPYL/RCAR6),Os05g0551900(-),Os06g0196900(-),Os06g0221200(OsANN5)…	MSTRG.10972(NUDT8),Os01g0110100(Pho1),Os01g0172600(-),Os01g0294700(OsPOD),Os01g0547600(NRT2.4),Os01g0600900(CAB2R),Os01g0602800(OsRLCK42),Os01g0639900(BETACA1),Os01g0720500(Lhcb1.1),Os01g0835500(rbohE),Os01g0849000(OsLTPd5),Os01g0869800(PSBS1),Os01g0927500(-),Os01g0952500(RR4),Os02g0129800(-),Os02g0192700(Pre),Os02g0202200(OsSPX2),Os02g0240300(prx29),Os02g0322400(-),Os02g0553200(APX8),Os02g057110…
GO:0008150	Biological Process	GO:0002376	immune system process	1	4	Os03g0108600(OsRH50)	Os01g0849000(OsLTPd5),Os05g0496200(OsPGK3),Os08g0159500(OsLSD1),Os12g0448900(PIOX)
GO:0008150	Biological Process	GO:0040007	growth	3	2	Os01g0883800(20ox2),Os05g0421900(GA20OX4),Os07g0209000(OsDGL1)	Os01g0927500(-),Os03g0227700(OsDWF4)
GO:0008150	Biological Process	GO:0051704	multi-organism process	4	10	Os01g0253300(rImpa1a),Os03g0108600(OsRH50),Os06g0602500(-),Os08g0508800(Lox2:Os:1)	Os01g0784700(-),Os01g0849000(OsLTPd5),Os03g0667100(OsNPR3),Os04g0401000(PI21),Os04g0419700(-),Os05g0496200(OsPGK3),Os06g0569500(KO4),Os10g0555900(OsEXPB3),Os10g0556100(OsEXPB4),Os12g0448900(PIOX)
GO:0008150	Biological Process	GO:0048511	rhythmic process	1	0	Os01g0182600(GI)	--
GO:0008150	Biological Process	GO:0022414	reproductive process	6	10	Os01g0182600(GI),Os01g0185200(-),Os01g0883800(20ox2),Os05g0421900(GA20OX4),Os06g0602500(-),Os12g0143800(DMC1A)	Os01g0784700(-),Os01g0927500(-),Os03g0100020(OsTET4),Os04g0419700(-),Os04g0501700(-),Os07g0508500(BRK1),Os07g0605200(MADS18),Os09g0306800(OsEMF2b),Os10g0555900(OsEXPB3),Os10g0556100(OsEXPB4)
GO:0008150	Biological Process	GO:0000003	reproduction	6	10	Os01g0182600(GI),Os01g0185200(-),Os01g0883800(20ox2),Os05g0421900(GA20OX4),Os06g0602500(-),Os12g0143800(DMC1A)	Os01g0784700(-),Os01g0927500(-),Os03g0100020(OsTET4),Os04g0419700(-),Os04g0501700(-),Os07g0508500(BRK1),Os07g0605200(MADS18),Os09g0306800(OsEMF2b),Os10g0555900(OsEXPB3),Os10g0556100(OsEXPB4)
GO:0008150	Biological Process	GO:0009987	cellular process	188	204	MSTRG.18061(rpoB),MSTRG.18063(rpoC1),MSTRG.18064(rpoC2),MSTRG.20157(atpH),MSTRG.21455(rpoA),MSTRG.30597(COX1),MSTRG.30599(RPL5),MSTRG.32231(CALS7),MSTRG.3260(atpB),MSTRG.3262(rpoC2),MSTRG.7689(TY3B-G),MSTRG.7987(XA21),MSTRG.8790(clpP),MSTRG.9395(--),MSTRG.9475(atpH),Os01g0115600(OsRLCK11),Os01g0120800(eIF-3a),Os01g0182600(GI),Os01g0185200(-),Os01g0200700(OsMT3a),Os01g0218100(OsbHLH037),Os01g02533…	MSTRG.18783(--),MSTRG.24927(rbcL),MSTRG.25931(SIT2),MSTRG.27298(OCT2),MSTRG.29101(--),MSTRG.4912(--),Os01g0110100(Pho1),Os01g0111100(OsCYP26-2),Os01g0123900(RBBI2-2),Os01g0124000(RBBI2-1),Os01g0132000(IAI2),Os01g0172600(-),Os01g0238500(-),Os01g0239200(OsTPT1),Os01g0294700(OsPOD),Os01g0332100(OsNIN2),Os01g0547600(NRT2.4),Os01g0583100(OsPP2C06/OsABI2),Os01g0600900(CAB2R),Os01g0602800(OsRLCK42),Os01…
GO:0008150	Biological Process	GO:0048519	negative regulation of biological process	9	11	MSTRG.7689(TY3B-G),MSTRG.7987(XA21),Os01g0286100(PIL15),Os02g0523500(OsTSN),Os02g0761900(-),Os03g0297600(OsPYL/RCAR4),Os03g0756000(-),Os05g0473000(OsPYL/RCAR6),Os08g0148600(-)	MSTRG.18783(--),MSTRG.29101(--),MSTRG.4912(--),Os01g0123900(RBBI2-2),Os01g0124000(RBBI2-1),Os01g0132000(IAI2),Os01g0823500(OsOFP4),Os07g0508500(BRK1),Os08g0159500(OsLSD1),Os09g0306800(OsEMF2b),Os12g0555500(OsPR10a)
GO:0008150	Biological Process	GO:0008152	metabolic process	162	196	MSTRG.18061(rpoB),MSTRG.18063(rpoC1),MSTRG.18064(rpoC2),MSTRG.20157(atpH),MSTRG.21455(rpoA),MSTRG.27933(rpl22),MSTRG.30597(COX1),MSTRG.30599(RPL5),MSTRG.32231(CALS7),MSTRG.3260(atpB),MSTRG.3262(rpoC2),MSTRG.7689(TY3B-G),MSTRG.7987(XA21),MSTRG.8790(clpP),MSTRG.9395(--),MSTRG.9475(atpH),Os01g0115600(OsRLCK11),Os01g0120800(eIF-3a),Os01g0185200(-),Os01g0218100(OsbHLH037),Os01g0286100(PIL15),Os01g0352…	MSTRG.18783(--),MSTRG.24927(rbcL),MSTRG.25931(SIT2),MSTRG.29101(--),MSTRG.4912(--),Os01g0111100(OsCYP26-2),Os01g0123900(RBBI2-2),Os01g0124000(RBBI2-1),Os01g0130400(-),Os01g0132000(IAI2),Os01g0147300(OsSTA4),Os01g0172600(-),Os01g0227800(-),Os01g0238500(-),Os01g0294700(OsPOD),Os01g0332100(OsNIN2),Os01g0547600(NRT2.4),Os01g0583100(OsPP2C06/OsABI2),Os01g0591000(ALDH1A),Os01g0600900(CAB2R),Os01g060280…
GO:0008150	Biological Process	GO:0023052	signaling	5	20	Os01g0286100(PIL15),Os03g0297600(OsPYL/RCAR4),Os03g0773300(-),Os05g0473000(OsPYL/RCAR6),Os07g0644100(OsbZIP60)	Os01g0602800(OsRLCK42),Os01g0927500(-),Os01g0952500(RR4),Os02g0322400(-),Os03g0128700(OSCDPK7),Os03g0227700(OsDWF4),Os03g0268600(OsPP2C30),Os03g0667100(OsNPR3),Os03g0717000(OsTMK),Os03g0773700(OsRLCK117),Os04g0442300(OSRR1),Os04g0547900(-),Os05g0332300(OsCIPK18),Os05g0566400(OsMPK7),Os08g0446200(-),Os10g0468500(-),Os10g0575800(-),Os11g0143300(OSRR9),Os12g0139400(RR10),Os12g0555500(OsPR10a)
GO:0008150	Biological Process	GO:0032501	multicellular organismal process	6	13	MSTRG.32231(CALS7),Os01g0182600(GI),Os01g0185200(-),Os01g0883800(20ox2),Os05g0421900(GA20OX4),Os06g0602500(-)	Os01g0784700(-),Os01g0927500(-),Os01g0952100(OsGLP1-5),Os02g0697400(4CL2),Os03g0100020(OsTET4),Os03g0227700(OsDWF4),Os03g0268600(OsPP2C30),Os04g0419700(-),Os04g0442300(OSRR1),Os07g0605200(MADS18),Os09g0306800(OsEMF2b),Os11g0158500(OsbHLH151),Os12g0555600(ND1)
GO:0008150	Biological Process	GO:0071840	cellular component organization or biogenesis	33	26	MSTRG.20157(atpH),MSTRG.32231(CALS7),MSTRG.9475(atpH),Os01g0120800(eIF-3a),Os01g0389700(-),Os01g0673800(Os),Os01g0883800(20ox2),Os01g0973300(-),Os02g0162500(-),Os02g0785800(-),Os03g0599800(OsUAM1),Os03g0787000(-),Os04g0349500(-),Os04g0485400(OsISC44),Os04g0599400(-),Os05g0168500(-),Os05g0227700(eIF-3l),Os05g0388500(-),Os05g0421900(GA20OX4),Os05g0509500(-),Os06g0634600(-),Os07g0209000(OsDGL1),Os07…	Os01g0775100(-),Os01g0880200(-),Os02g0697400(4CL2),Os03g0213400(-),Os03g0227700(OsDWF4),Os03g0333400(-),Os03g0370400(-),Os03g0784300(-),Os03g0786500(-),Os03g0833800(OsPGL28),Os04g0501700(-),Os05g0176100(OsCesA1),Os05g0413200(TUB6),Os05g0562800(-),Os06g0697000(OsXTH10),Os07g0208500(OsCesA8),Os07g0424400(OsCesA3),Os07g0508500(BRK1),Os07g0671700(OsPRMT4),Os08g0160500(CSLF6),Os09g0306800(OsEMF2b),Os0…
GO:0008150	Biological Process	GO:0032502	developmental process	6	12	MSTRG.32231(CALS7),Os01g0182600(GI),Os01g0185200(-),Os01g0883800(20ox2),Os05g0421900(GA20OX4),Os07g0209000(OsDGL1)	Os01g0927500(-),Os01g0952100(OsGLP1-5),Os02g0697400(4CL2),Os03g0100020(OsTET4),Os03g0227700(OsDWF4),Os03g0268600(OsPP2C30),Os04g0442300(OSRR1),Os07g0605200(MADS18),Os08g0159500(OsLSD1),Os09g0306800(OsEMF2b),Os11g0158500(OsbHLH151),Os12g0555600(ND1)
GO:0008150	Biological Process	GO:0048518	positive regulation of biological process	6	4	Os01g0746200(NUP85),Os03g0315400(OsMYB2),Os06g0196900(-),Os07g0644100(OsbZIP60),Os08g0416000(Oshox5),Os12g0507200(eIF-4d)	Os02g0322400(-),Os02g0671300(OsbHLH076),Os05g0496200(OsPGK3),Os07g0605200(MADS18)
GO:0008150	Biological Process	GO:0065007	biological regulation	46	51	MSTRG.32231(CALS7),MSTRG.7689(TY3B-G),MSTRG.7987(XA21),Os01g0182600(GI),Os01g0200700(OsMT3a),Os01g0218100(OsbHLH037),Os01g0286100(PIL15),Os01g0655500(-),Os01g0746200(NUP85),Os01g0850550(OsLAC7),Os01g0973300(-),Os02g0122800(-),Os02g0523500(OsTSN),Os02g0761900(-),Os03g0183000(OsLG3),Os03g0297600(OsPYL/RCAR4),Os03g0315400(OsMYB2),Os03g0327800(NAC58),Os03g0405500(-),Os03g0670700(OsGRP3),Os03g0756000(…	MSTRG.18783(--),MSTRG.29101(--),MSTRG.4912(--),Os01g0123900(RBBI2-2),Os01g0124000(RBBI2-1),Os01g0132000(IAI2),Os01g0602800(OsRLCK42),Os01g0639900(BETACA1),Os01g0823500(OsOFP4),Os01g0850700(OsLAC8),Os01g0927500(-),Os01g0952100(OsGLP1-5),Os01g0952500(RR4),Os02g0192700(Pre),Os02g0322400(-),Os02g0671300(OsbHLH076),Os02g0726300(OsDof4),Os02g0731700(OsBBX8),Os02g0775100(MTP8.2),Os03g0100020(OsTET4),Os0…
GO:0008150	Biological Process	GO:0050789	regulation of biological process	38	45	MSTRG.32231(CALS7),MSTRG.7689(TY3B-G),MSTRG.7987(XA21),Os01g0182600(GI),Os01g0218100(OsbHLH037),Os01g0286100(PIL15),Os01g0655500(-),Os01g0746200(NUP85),Os02g0122800(-),Os02g0523500(OsTSN),Os02g0761900(-),Os03g0183000(OsLG3),Os03g0297600(OsPYL/RCAR4),Os03g0315400(OsMYB2),Os03g0327800(NAC58),Os03g0405500(-),Os03g0670700(OsGRP3),Os03g0756000(-),Os03g0773300(-),Os03g0815900(-),Os04g0637000(OsTGAP1),O…	MSTRG.18783(--),MSTRG.29101(--),MSTRG.4912(--),Os01g0123900(RBBI2-2),Os01g0124000(RBBI2-1),Os01g0132000(IAI2),Os01g0602800(OsRLCK42),Os01g0639900(BETACA1),Os01g0823500(OsOFP4),Os01g0927500(-),Os01g0952100(OsGLP1-5),Os01g0952500(RR4),Os02g0192700(Pre),Os02g0322400(-),Os02g0671300(OsbHLH076),Os02g0726300(OsDof4),Os02g0731700(OsBBX8),Os03g0100020(OsTET4),Os03g0128700(OSCDPK7),Os03g0227700(OsDWF4),Os…
GO:0003674	Molecular Function	GO:0005215	transporter activity	37	41	MSTRG.20157(atpH),MSTRG.3260(atpB),MSTRG.9475(atpH),Os01g0253300(rImpa1a),Os01g0504500(-),Os01g0930400(HAK5),Os02g0703900(OsUMAMIT6),Os02g0787600(OsGLR1.2),Os02g0823100(OsPIP1),Os03g0197200(-),Os03g0296800(MIT),Os03g0616700(-),Os03g0644400(OsProT),Os04g0209300(OsABCC10),Os04g0373400(-),Os04g0401700(HAK1),Os04g0587400(OsPUP6),Os04g0599400(-),Os05g0302700(-),Os05g0424000(OsAAP11F),Os06g0210000(-),O…	MSTRG.27298(OCT2),Os01g0110100(Pho1),Os01g0239200(OsTPT1),Os01g0547600(NRT2.4),Os01g0609200(OsABCG35),Os01g0695700(OsABCB4),Os01g0706700(-),Os01g0902700(-),Os02g0102200(OsAAP7C),Os02g0117500(OsGLR3.1),Os02g0301100(OsSWEET4),Os02g0318450(-),Os02g0716800(OsNRT1.5B),Os02g0730300(OsHAK25),Os02g0745100(LSI1),Os02g0750100(-),Os02g0775100(MTP8.2),Os03g0149300(-),Os03g0188100(OsMATE1),Os03g0233000(-),Os0…
GO:0003674	Molecular Function	GO:0003824	catalytic activity	122	201	MSTRG.18061(rpoB),MSTRG.18063(rpoC1),MSTRG.18064(rpoC2),MSTRG.20157(atpH),MSTRG.21455(rpoA),MSTRG.30597(COX1),MSTRG.32231(CALS7),MSTRG.3260(atpB),MSTRG.3262(rpoC2),MSTRG.8790(clpP),MSTRG.9475(atpH),Os01g0115600(OsRLCK11),Os01g0185200(-),Os01g0352100(-),Os01g0543600(-),Os01g0551100(-),Os01g0564300(OsFKBP46),Os01g0627800(-),Os01g0655500(-),Os01g0719100(OsRZFP34),Os01g0796400(-),Os01g0830700(OsTBL12…	MSTRG.10972(NUDT8),MSTRG.24927(rbcL),MSTRG.25931(SIT2),MSTRG.27115(HIDM),MSTRG.9282(LOC_Os12g27220),Os01g0111100(OsCYP26-2),Os01g0113900(-),Os01g0130400(-),Os01g0132000(IAI2),Os01g0147300(OsSTA4),Os01g0172600(-),Os01g0227800(-),Os01g0238500(-),Os01g0294700(OsPOD),Os01g0332100(OsNIN2),Os01g0583100(OsPP2C06/OsABI2),Os01g0591000(ALDH1A),Os01g0602800(OsRLCK42),Os01g0609200(OsABCG35),Os01g0609300(OsPD…
GO:0003674	Molecular Function	GO:0005198	structural molecule activity	25	2	MSTRG.27933(rpl22),MSTRG.30599(RPL5),MSTRG.8790(clpP),Os01g0746200(NUP85),Os02g0105900(-),Os02g0162500(-),Os02g0785800(-),Os03g0219900(-),Os03g0452300(-),Os03g0711400(OsWD40-84),Os03g0756000(-),Os03g0796501(OsRPL4),Os04g0349500(-),Os05g0388500(-),Os07g0180900(-),Os08g0117300(-),Os09g0258600(rpl22),Os09g0453500(-),Os09g0485900(-),Os11g0220800(-),Os12g0124200(-),Os12g0567700(rpl2),gene-rpl2-2(-),ge…	Os04g0501700(-),Os05g0413200(TUB6)
GO:0003674	Molecular Function	GO:0016209	antioxidant activity	5	9	Os04g0688500(prx62),Os06g0221200(OsANN5),Os07g0676900(prx109),Os08g0113000(prx117),Os12g0178100(OsAPx6)	Os01g0172600(-),Os01g0294700(OsPOD),Os01g0835500(rbohE),Os02g0192700(Pre),Os02g0240300(prx29),Os02g0553200(APX8),Os04g0602100(-),Os10g0109300(PRX125),Os12g0448900(PIOX)
GO:0003674	Molecular Function	GO:0004871	signal transducer activity	4	6	Os02g0787600(OsGLR1.2),Os03g0297600(OsPYL/RCAR4),Os03g0773300(-),Os05g0473000(OsPYL/RCAR6)	Os01g0602800(OsRLCK42),Os01g0927500(-),Os02g0117500(OsGLR3.1),Os03g0717000(OsTMK),Os05g0566400(OsMPK7),Os12g0555500(OsPR10a)
GO:0003674	Molecular Function	GO:0060089	molecular transducer activity	4	5	Os02g0787600(OsGLR1.2),Os03g0297600(OsPYL/RCAR4),Os03g0773300(-),Os05g0473000(OsPYL/RCAR6)	Os01g0602800(OsRLCK42),Os01g0927500(-),Os02g0117500(OsGLR3.1),Os03g0717000(OsTMK),Os12g0555500(OsPR10a)
GO:0003674	Molecular Function	GO:0045735	nutrient reservoir activity	0	2	--	Os01g0952100(OsGLP1-5),Os09g0552600(-)
GO:0003674	Molecular Function	GO:0009055	electron carrier activity	3	1	MSTRG.30597(COX1),Os05g0529700(OsDjC50),gene-cob(-)	Os08g0104600(Fd1)
GO:0003674	Molecular Function	GO:0098772	molecular function regulator	4	4	Os02g0761900(-),Os02g0812400(-),Os03g0297600(OsPYL/RCAR4),Os05g0473000(OsPYL/RCAR6)	Os01g0123900(RBBI2-2),Os01g0124000(RBBI2-1),Os01g0132000(IAI2),Os12g0555500(OsPR10a)
GO:0003674	Molecular Function	GO:0001071	nucleic acid binding transcription factor activity	7	6	Os03g0183000(OsLG3),Os04g0637000(OsTGAP1),Os05g0316800(OsERF#056),Os07g0644100(OsbZIP60),Os08g0416000(Oshox5),Os11g0705200(-),Os12g0573200(-)	Os02g0104500(-),Os02g0671300(OsbHLH076),Os07g0605200(MADS18),Os11g0117500(OsWRKY40),Os11g0158500(OsbHLH151),Os12g0116400(OsWRKY97)
GO:0003674	Molecular Function	GO:0005488	binding	165	163	MSTRG.18061(rpoB),MSTRG.18063(rpoC1),MSTRG.18064(rpoC2),MSTRG.20157(atpH),MSTRG.21455(rpoA),MSTRG.27933(rpl22),MSTRG.30597(COX1),MSTRG.30599(RPL5),MSTRG.32231(CALS7),MSTRG.3260(atpB),MSTRG.3262(rpoC2),MSTRG.8790(clpP),MSTRG.9395(--),MSTRG.9475(atpH),Os01g0115600(OsRLCK11),Os01g0120800(eIF-3a),Os01g0183800(OsFbox004),Os01g0185200(-),Os01g0200700(OsMT3a),Os01g0218100(OsbHLH037),Os01g0253300(rImpa1a…	MSTRG.24927(rbcL),MSTRG.25931(SIT2),Os01g0110100(Pho1),Os01g0130400(-),Os01g0172600(-),Os01g0227800(-),Os01g0238500(-),Os01g0294700(OsPOD),Os01g0583100(OsPP2C06/OsABI2),Os01g0600900(CAB2R),Os01g0602800(OsRLCK42),Os01g0609200(OsABCG35),Os01g0609300(OsPDR9),Os01g0639900(BETACA1),Os01g0661500(-),Os01g0695700(OsABCB4),Os01g0705700(OsICE1),Os01g0720500(Lhcb1.1),Os01g0775100(-),Os01g0782100(PISH),Os01g…
GO:0005575	Cellular Component	GO:0005576	extracellular region	8	22	Os01g0382000(OsPR1b),Os01g0850550(OsLAC7),Os04g0688500(prx62),Os05g0374200(OsCKX9),Os06g0221200(OsANN5),Os07g0676900(prx109),Os08g0113000(prx117),Os09g0442300(-)	Os01g0123900(RBBI2-2),Os01g0124000(RBBI2-1),Os01g0132000(IAI2),Os01g0294700(OsPOD),Os01g0850700(OsLAC8),Os01g0952100(OsGLP1-5),Os02g0240300(prx29),Os03g0833800(OsPGL28),Os04g0459500(-),Os05g0247100(DIP3),Os06g0573600(OsBgal2),Os06g0697000(OsXTH10),Os08g0375400(-),Os08g0556900(CP),Os09g0452800(-),Os09g0533900(OsGH9B5),Os10g0109300(PRX125),Os10g0555900(OsEXPB3),Os10g0556100(OsEXPB4),Os12g0123500(-)…
GO:0005575	Cellular Component	GO:0016020	membrane	100	141	MSTRG.20157(atpH),MSTRG.30597(COX1),MSTRG.32231(CALS7),MSTRG.3260(atpB),MSTRG.9467(YMF16),MSTRG.9475(atpH),Os01g0120800(eIF-3a),Os01g0389700(-),Os01g0504500(-),Os01g0543600(-),Os01g0673800(Os),Os01g0677900(-),Os01g0678100(-),Os01g0746200(NUP85),Os01g0824800(-),Os01g0830700(OsTBL12),Os01g0850550(OsLAC7),Os01g0930400(HAK5),Os01g0940700(OsPR2),Os01g0973300(-),Os02g0184900(-),Os02g0218200(-),Os02g021…	Os01g0110100(Pho1),Os01g0147300(OsSTA4),Os01g0227800(-),Os01g0239200(OsTPT1),Os01g0547600(NRT2.4),Os01g0600900(CAB2R),Os01g0602800(OsRLCK42),Os01g0609200(OsABCG35),Os01g0609300(OsPDR9),Os01g0661500(-),Os01g0695700(OsABCB4),Os01g0706700(-),Os01g0720500(Lhcb1.1),Os01g0784700(-),Os01g0825900(-),Os01g0835500(rbohE),Os01g0850700(OsLAC8),Os01g0869800(PSBS1),Os01g0880200(-),Os01g0902700(-),Os01g0927500(…
GO:0005575	Cellular Component	GO:0044464	cell part	180	192	MSTRG.18061(rpoB),MSTRG.18063(rpoC1),MSTRG.18064(rpoC2),MSTRG.20157(atpH),MSTRG.21455(rpoA),MSTRG.27933(rpl22),MSTRG.30597(COX1),MSTRG.30599(RPL5),MSTRG.32231(CALS7),MSTRG.3260(atpB),MSTRG.3262(rpoC2),MSTRG.3271(--),MSTRG.7689(TY3B-G),MSTRG.7987(XA21),MSTRG.8790(clpP),MSTRG.9467(YMF16),MSTRG.9475(atpH),Os01g0120800(eIF-3a),Os01g0182600(GI),Os01g0185200(-),Os01g0218100(OsbHLH037),Os01g0253300(rImp…	MSTRG.10972(NUDT8),MSTRG.18783(--),MSTRG.24927(rbcL),MSTRG.25931(SIT2),MSTRG.29101(--),MSTRG.4912(--),Os01g0110100(Pho1),Os01g0111100(OsCYP26-2),Os01g0172600(-),Os01g0238500(-),Os01g0239200(OsTPT1),Os01g0294700(OsPOD),Os01g0332100(OsNIN2),Os01g0547600(NRT2.4),Os01g0600900(CAB2R),Os01g0602800(OsRLCK42),Os01g0609200(OsABCG35),Os01g0638600(UGT703A1),Os01g0639900(BETACA1),Os01g0661500(-),Os01g0720500…
GO:0005575	Cellular Component	GO:0055044	symplast	4	8	Os02g0823100(OsPIP1),Os04g0688500(prx62),Os07g0209000(OsDGL1),Os08g0113000(prx117)	Os01g0172600(-),Os01g0294700(OsPOD),Os01g0952100(OsGLP1-5),Os03g0100020(OsTET4),Os04g0233400(OsPIP2),Os04g0537800(-),Os05g0122800(OsTET7),Os08g0102700(-)
GO:0005575	Cellular Component	GO:0005623	cell	183	192	MSTRG.18061(rpoB),MSTRG.18063(rpoC1),MSTRG.18064(rpoC2),MSTRG.20157(atpH),MSTRG.21455(rpoA),MSTRG.27933(rpl22),MSTRG.30597(COX1),MSTRG.30599(RPL5),MSTRG.32231(CALS7),MSTRG.3260(atpB),MSTRG.3262(rpoC2),MSTRG.3271(--),MSTRG.7689(TY3B-G),MSTRG.7987(XA21),MSTRG.8790(clpP),MSTRG.9467(YMF16),MSTRG.9475(atpH),Os01g0120800(eIF-3a),Os01g0182600(GI),Os01g0185200(-),Os01g0200700(OsMT3a),Os01g0218100(OsbHLH0…	MSTRG.10972(NUDT8),MSTRG.18783(--),MSTRG.24927(rbcL),MSTRG.25931(SIT2),MSTRG.29101(--),MSTRG.4912(--),Os01g0110100(Pho1),Os01g0111100(OsCYP26-2),Os01g0172600(-),Os01g0238500(-),Os01g0239200(OsTPT1),Os01g0294700(OsPOD),Os01g0332100(OsNIN2),Os01g0547600(NRT2.4),Os01g0600900(CAB2R),Os01g0602800(OsRLCK42),Os01g0609200(OsABCG35),Os01g0638600(UGT703A1),Os01g0639900(BETACA1),Os01g0661500(-),Os01g0720500…
GO:0005575	Cellular Component	GO:0030054	cell junction	4	8	Os02g0823100(OsPIP1),Os04g0688500(prx62),Os07g0209000(OsDGL1),Os08g0113000(prx117)	Os01g0172600(-),Os01g0294700(OsPOD),Os01g0952100(OsGLP1-5),Os03g0100020(OsTET4),Os04g0233400(OsPIP2),Os04g0537800(-),Os05g0122800(OsTET7),Os08g0102700(-)
GO:0005575	Cellular Component	GO:0044425	membrane part	77	122	MSTRG.20157(atpH),MSTRG.30597(COX1),MSTRG.32231(CALS7),MSTRG.3260(atpB),MSTRG.9467(YMF16),MSTRG.9475(atpH),Os01g0120800(eIF-3a),Os01g0389700(-),Os01g0504500(-),Os01g0677900(-),Os01g0678100(-),Os01g0824800(-),Os01g0830700(OsTBL12),Os01g0930400(HAK5),Os01g0940700(OsPR2),Os01g0973300(-),Os02g0219900(-),Os02g0703900(OsUMAMIT6),Os02g0787600(OsGLR1.2),Os02g0823100(OsPIP1),Os03g0194900(-),Os03g0197200(-…	Os01g0110100(Pho1),Os01g0147300(OsSTA4),Os01g0227800(-),Os01g0239200(OsTPT1),Os01g0547600(NRT2.4),Os01g0600900(CAB2R),Os01g0609200(OsABCG35),Os01g0609300(OsPDR9),Os01g0695700(OsABCB4),Os01g0706700(-),Os01g0720500(Lhcb1.1),Os01g0784700(-),Os01g0825900(-),Os01g0835500(rbohE),Os01g0869800(PSBS1),Os01g0880200(-),Os01g0902700(-),Os01g0927500(-),Os01g0938100(PSB28),Os01g0946500(-),Os02g0102200(OsAAP7C)…
GO:0005575	Cellular Component	GO:0044422	organelle part	55	50	MSTRG.20157(atpH),MSTRG.27933(rpl22),MSTRG.30597(COX1),MSTRG.30599(RPL5),MSTRG.3260(atpB),MSTRG.8790(clpP),MSTRG.9475(atpH),Os01g0253300(rImpa1a),Os01g0673800(Os),Os01g0746200(NUP85),Os02g0105900(-),Os02g0122800(-),Os02g0162500(-),Os02g0218200(-),Os02g0785800(-),Os03g0219900(-),Os03g0423300(-),Os03g0452300(-),Os03g0616700(-),Os03g0708600(OsRH21),Os03g0711400(OsWD40-84),Os03g0733800(ERO1),Os03g075…	Os01g0110100(Pho1),Os01g0239200(OsTPT1),Os01g0547600(NRT2.4),Os01g0600900(CAB2R),Os01g0720500(Lhcb1.1),Os01g0775100(-),Os01g0869800(PSBS1),Os01g0938100(PSB28),Os01g0956600(-),Os02g0129900(-),Os02g0192700(Pre),Os02g0553200(APX8),Os02g0731600(-),Os02g0775100(MTP8.2),Os03g0333400(-),Os03g0592500(LHCB),Os03g0645900(OsNCED1),Os03g0778100(OsPS1-F),Os03g0784300(-),Os04g0406600(-),Os04g0457000(CP24),Os04…
GO:0005575	Cellular Component	GO:0044421	extracellular region part	3	1	Os01g0382000(OsPR1b),Os05g0374200(OsCKX9),Os09g0442300(-)	Os08g0556900(CP)
GO:0005575	Cellular Component	GO:0032991	macromolecular complex	48	28	MSTRG.20157(atpH),MSTRG.27933(rpl22),MSTRG.30599(RPL5),MSTRG.3260(atpB),MSTRG.8790(clpP),MSTRG.9475(atpH),Os01g0120800(eIF-3a),Os01g0746200(NUP85),Os01g0973300(-),Os02g0105900(-),Os02g0122800(-),Os02g0162500(-),Os02g0523500(OsTSN),Os02g0785800(-),Os02g0812400(-),Os03g0219900(-),Os03g0452300(-),Os03g0670700(OsGRP3),Os03g0708600(OsRH21),Os03g0711400(OsWD40-84),Os03g0756000(-),Os03g0787000(-),Os03g0…	Os01g0600900(CAB2R),Os01g0706700(-),Os01g0720500(Lhcb1.1),Os01g0775100(-),Os01g0869800(PSBS1),Os01g0938100(PSB28),Os01g0956600(-),Os03g0592500(LHCB),Os03g0765900(-),Os03g0778100(OsPS1-F),Os04g0457000(CP24),Os04g0501700(-),Os05g0223200(-),Os05g0560000(PSAH),Os06g0320500(-),Os07g0508500(BRK1),Os07g0558400(CP29),Os07g0577600(-),Os08g0389700(-),Os08g0435900(cab),Os08g0560900(PsaD),Os09g0306800(OsEMF2…
GO:0005575	Cellular Component	GO:0099512	supramolecular fiber	0	2	--	Os04g0501700(-),Os05g0413200(TUB6)
GO:0005575	Cellular Component	GO:0043226	organelle	122	120	MSTRG.18061(rpoB),MSTRG.18063(rpoC1),MSTRG.18064(rpoC2),MSTRG.20157(atpH),MSTRG.21455(rpoA),MSTRG.27933(rpl22),MSTRG.30597(COX1),MSTRG.30599(RPL5),MSTRG.32231(CALS7),MSTRG.3260(atpB),MSTRG.3262(rpoC2),MSTRG.3271(--),MSTRG.7689(TY3B-G),MSTRG.7987(XA21),MSTRG.8790(clpP),MSTRG.9467(YMF16),MSTRG.9475(atpH),Os01g0182600(GI),Os01g0218100(OsbHLH037),Os01g0253300(rImpa1a),Os01g0286100(PIL15),Os01g0655500…	MSTRG.18783(--),MSTRG.24927(rbcL),MSTRG.25931(SIT2),MSTRG.29101(--),MSTRG.4912(--),Os01g0110100(Pho1),Os01g0111100(OsCYP26-2),Os01g0239200(OsTPT1),Os01g0332100(OsNIN2),Os01g0547600(NRT2.4),Os01g0600900(CAB2R),Os01g0638600(UGT703A1),Os01g0661500(-),Os01g0720500(Lhcb1.1),Os01g0734600(OsUGT706E1),Os01g0775100(-),Os01g0869800(PSBS1),Os01g0917400(C3H12),Os01g0938100(PSB28),Os01g0952500(RR4),Os01g09566…
GO:0005575	Cellular Component	GO:0031974	membrane-enclosed lumen	9	5	Os01g0253300(rImpa1a),Os02g0122800(-),Os03g0452300(-),Os06g0196900(-),Os07g0209000(OsDGL1),Os08g0117300(-),Os08g0412200(-),Os11g0704700(-),Os12g0143800(DMC1A)	Os01g0775100(-),Os01g0956600(-),Os05g0223200(-),Os07g0508500(BRK1),Os10g0575800(-)

## Sheet:  ZJ22b-vs-ZJ22c
All enrichment GO terms of mRNAs of the comparison between ZJ22b and ZJ22c.
GO ID (level1)	GO Term (level1)	GO ID (level2)	GO Term (level2)	number_of_ZJ22b-vs-ZJ22c (up)	number_of_ZJ22b-vs-ZJ22c (down)	Genes_of_ZJ22b-vs-ZJ22c_up	Genes_of_ZJ22b-vs-ZJ22c_down
GO:0008150	Biological Process	GO:0048511	rhythmic process	0	1	--	Os01g0498200(-)
GO:0008150	Biological Process	GO:0008152	metabolic process	11	10	Os01g0712700(-),Os03g0405500(-),Os03g0769100(WGL2),Os05g0316800(OsERF#056),Os07g0147500(PsbR),Os07g0673100(OsTINP1),Os08g0557100(-),Os09g0485900(-),Os10g0389200(OsRCCR1),Os10g0457600(-),Os11g0432900(OsSCP56)	Os01g0238500(-),Os01g0498200(-),Os01g0720500(Lhcb1.1),Os02g0716500(OsFAD2),Os05g0161500(-),Os05g0408900(CLA1),Os06g0654000(-),Os10g0181200(-),Os12g0441600(-),gene-psaB(-)
GO:0008150	Biological Process	GO:0071840	cellular component organization or biogenesis	4	0	Os03g0769100(WGL2),Os07g0673100(OsTINP1),Os08g0557100(-),Os09g0458400(OsCYO1)	--
GO:0008150	Biological Process	GO:0050896	response to stimulus	3	1	Os02g0689900(OsNRT1.5A),Os08g0539700(Pib-H8),Os10g0457600(-)	Os01g0720500(Lhcb1.1)
GO:0008150	Biological Process	GO:0009987	cellular process	12	8	Os01g0712700(-),Os02g0689900(OsNRT1.5A),Os03g0405500(-),Os03g0769100(WGL2),Os05g0316800(OsERF#056),Os07g0147500(PsbR),Os07g0673100(OsTINP1),Os08g0557100(-),Os09g0458400(OsCYO1),Os09g0485900(-),Os10g0389200(OsRCCR1),Os10g0457600(-)	Os01g0238500(-),Os01g0498200(-),Os01g0720500(Lhcb1.1),Os05g0161500(-),Os05g0408900(CLA1),Os06g0654000(-),Os12g0441600(-),gene-psaB(-)
GO:0008150	Biological Process	GO:0051179	localization	2	1	Os02g0689900(OsNRT1.5A),Os11g0174000(-)	Os10g0100300(TIC62)
GO:0008150	Biological Process	GO:0050789	regulation of biological process	3	2	Os03g0405500(-),Os05g0316800(OsERF#056),Os08g0557100(-)	Os01g0498200(-),Os10g0181200(-)
GO:0008150	Biological Process	GO:0065007	biological regulation	3	2	Os03g0405500(-),Os05g0316800(OsERF#056),Os08g0557100(-)	Os01g0498200(-),Os10g0181200(-)
GO:0008150	Biological Process	GO:0044699	single-organism process	7	4	Os01g0712700(-),Os02g0689900(OsNRT1.5A),Os03g0405500(-),Os10g0389200(OsRCCR1),Os10g0457600(-),Os11g0174000(-),Os11g0432900(OsSCP56)	Os01g0238500(-),Os02g0716500(OsFAD2),Os05g0161500(-),Os05g0408900(CLA1)
GO:0003674	Molecular Function	GO:0005198	structural molecule activity	3	0	Os03g0769100(WGL2),Os09g0485900(-),Os11g0174000(-)	--
GO:0003674	Molecular Function	GO:0003824	catalytic activity	6	7	Os01g0712700(-),Os03g0405500(-),Os09g0458400(OsCYO1),Os10g0389200(OsRCCR1),Os10g0457600(-),Os11g0432900(OsSCP56)	Os01g0238500(-),Os02g0716500(OsFAD2),Os05g0161500(-),Os05g0408900(CLA1),Os06g0654000(-),Os10g0181200(-),Os12g0441600(-)
GO:0003674	Molecular Function	GO:0001071	nucleic acid binding transcription factor activity	1	0	Os05g0316800(OsERF#056)	--
GO:0003674	Molecular Function	GO:0005488	binding	7	8	Os01g0712700(-),Os03g0769100(WGL2),Os05g0316800(OsERF#056),Os08g0539700(Pib-H8),Os08g0557100(-),Os09g0458400(OsCYO1),Os09g0485900(-)	Os01g0238500(-),Os01g0720500(Lhcb1.1),Os05g0161500(-),Os05g0408900(CLA1),Os08g0247600(-),Os10g0100300(TIC62),Os10g0181200(-),Os12g0441600(-)
GO:0003674	Molecular Function	GO:0005215	transporter activity	1	0	Os02g0689900(OsNRT1.5A)	--
GO:0005575	Cellular Component	GO:0032991	macromolecular complex	6	3	Os03g0769100(WGL2),Os07g0147500(PsbR),Os07g0673100(OsTINP1),Os08g0557100(-),Os09g0485900(-),Os11g0174000(-)	Os01g0720500(Lhcb1.1),Os10g0100300(TIC62),gene-psaB(-)
GO:0005575	Cellular Component	GO:0005623	cell	13	8	Os01g0712700(-),Os02g0689900(OsNRT1.5A),Os03g0405500(-),Os03g0769100(WGL2),Os05g0316800(OsERF#056),Os07g0147500(PsbR),Os07g0673100(OsTINP1),Os08g0557100(-),Os09g0458400(OsCYO1),Os09g0485900(-),Os10g0389200(OsRCCR1),Os10g0457600(-),Os11g0174000(-)	Os01g0238500(-),Os01g0720500(Lhcb1.1),Os05g0161500(-),Os05g0408900(CLA1),Os10g0100300(TIC62),Os10g0181200(-),Os12g0441600(-),gene-psaB(-)
GO:0005575	Cellular Component	GO:0044422	organelle part	5	3	Os03g0769100(WGL2),Os08g0557100(-),Os09g0458400(OsCYO1),Os09g0485900(-),Os11g0174000(-)	Os01g0720500(Lhcb1.1),Os05g0408900(CLA1),Os10g0100300(TIC62)
GO:0005575	Cellular Component	GO:0044464	cell part	12	8	Os01g0712700(-),Os02g0689900(OsNRT1.5A),Os03g0769100(WGL2),Os05g0316800(OsERF#056),Os07g0147500(PsbR),Os07g0673100(OsTINP1),Os08g0557100(-),Os09g0458400(OsCYO1),Os09g0485900(-),Os10g0389200(OsRCCR1),Os10g0457600(-),Os11g0174000(-)	Os01g0238500(-),Os01g0720500(Lhcb1.1),Os05g0161500(-),Os05g0408900(CLA1),Os10g0100300(TIC62),Os10g0181200(-),Os12g0441600(-),gene-psaB(-)
GO:0005575	Cellular Component	GO:0043226	organelle	8	5	Os03g0769100(WGL2),Os05g0316800(OsERF#056),Os08g0557100(-),Os09g0458400(OsCYO1),Os09g0485900(-),Os10g0389200(OsRCCR1),Os10g0457600(-),Os11g0174000(-)	Os01g0720500(Lhcb1.1),Os05g0161500(-),Os05g0408900(CLA1),Os10g0100300(TIC62),Os10g0181200(-)
GO:0005575	Cellular Component	GO:0016020	membrane	6	5	Os02g0689900(OsNRT1.5A),Os06g0493100(bphi008a),Os07g0147500(PsbR),Os08g0557100(-),Os09g0458400(OsCYO1),Os11g0174000(-)	Os01g0720500(Lhcb1.1),Os01g0825500(-),Os02g0716500(OsFAD2),Os10g0100300(TIC62),gene-psaB(-)
GO:0005575	Cellular Component	GO:0044425	membrane part	4	5	Os02g0689900(OsNRT1.5A),Os06g0493100(bphi008a),Os07g0147500(PsbR),Os11g0174000(-)	Os01g0720500(Lhcb1.1),Os01g0825500(-),Os02g0716500(OsFAD2),Os10g0100300(TIC62),gene-psaB(-)
