# Supplementary material for: Whole-Transcriptome Analysis Reveals Autophagy Is Involved in Early Senescence of zj-es Mutant Rice
Source: Front Plant Sci. 2022 Jun 3;13:899054. doi: 10.3389/fpls.2022.899054 (PMC9204060; doi:10.3389/fpls.2022.899054)
Supplement: Supplementary file 12 [file Table_12.XLSX]

## Sheet: ZJ22a-vs-zj-esa
All enrichment pathways of mRNAs of the comparison between ZJ22a and zj-esa.
KEGG_A_class	KEGG_B_class	Pathway	ZJ22a-vs-Pir1a (809)	All (5841)	Pvalue	Qvalue	Pathway ID	Genes	K_IDs
Genetic Information Processing	Translation	Ribosome	155	359	1.78615e-45	2.19697e-43	ko03010	Os12g0167900(RPL3A);Os11g0151300(OsRPL26.1);Os02g0478700(-);Os01g0276000(-);Os09g0502000(rpL32_9.3);Os07g0180900(-);Os07g0523500(-);Os08g0436800(-);Os02g0103700(-);Os06g0555400(-);Os11g0127900(OsRP1);Os03g0182600(-);Os07g0658200(-);Os07g0523700(-);Os03g0141000(-);Os05g0565000(RPL18A);Os05g0556900(OsRPL35a.3);Os03g0139100(-);Os04g0413600(-);Os11g0634500(-);Os07g0674700(-);Os11g0433900(OsRPL38);Os0…	K02925+K02898+K02978+K02908+K02912+K02930+K02929+K02915+K02940+K02974+K02960+K02998+K02996+K02929+K02889+K02882+K02917+K02894+K02955+K02980+K02883+K02923+K02942+K02896+K02908+K02868+K02894+K02997+K02976+K02921+K02989+K02929+K02891+K02922+K02938+K02962+K02873+K02870+K02943+K02980+K02989+K02940+K02937+K02936+K02947+K02910+K02866+K02893+K02974+K02969+K02966+K02875+K02997+K02880+K02976+K02935+K02872+…
Genetic Information Processing	Translation	Ribosome biogenesis in eukaryotes	35	99	4.59059e-08	2.82321e-06	ko03008	Os07g0636000(-);Os03g0350300(BIP102);Os02g0821800(OsMed18_1);Os01g0375000(Os_F0781);Os06g0109400(-);Os02g0728600(-);Os11g0579800(-);Os01g0649000(-);Os05g0176000(OsMed36_2);Os03g0350100(BIP101);Os03g0858100(-);Os03g0333100(-);Os02g0103900(-);Os10g0573900(OsNMD3);Os06g0644600(OsWD40-131);Os07g0224900(OsWD40-138);Os03g0352400(OsNug2);Os08g0155000(-);Os02g0618250(-);Os11g0545000(-);Os07g0603200(-);Os…	K11131+K14565+K14563+K14538+K14571+K11129+K11128+K14546+K14563+K14565+K14290+K14569+K14557+K07562+K14554+K14549+K14537+K14561+K11130+K14565+K14553+K12845+K14546+K11131+K14560+K14552+K14558+K14544+K14572+K11129+K11108+K14555+K14564+K14566+K14573
Metabolism	Global and overview maps	Biosynthesis of amino acids	64	269	4.98688e-06	0.000204462	ko01230	Os08g0342400(-);Os01g0817700(BPM);Os08g0320400(-);Os02g0655300(-);Os08g0120600(-);Os08g0447000(-);Os07g0191000(-);Os03g0264400(OASA2);Os05g0549700(-);Os02g0266000(-);Os06g0133900(EPSPS);Os03g0291500(ASN1);Os03g0617900(-);Os09g0294000(-);Os09g0505700(-);Os05g0524400(OsPFK05);Os12g0138900(OsIPMS2);Os02g0436400(-);Os01g0118000(-);Os03g0389700(OsDAHPS1);Os05g0482700(-);Os04g0650800(-);Os06g0632200(TS…	K12524+K15633+K01609+K01704+K01623+K00058+K18649+K01657+K01733+K01817+K00800+K01953+K00145+K12524+K01783+K00850+K01649+K00215+K01623+K01626+K15633+K00058+K06001+K01687+K00620+K00948+K01755+K00052+K01620+K00873+K00616+K00133+K00930+K10206+K01714+K00611+K00831+K01609+K00872+K00549+K01681+K01940+K00053+K00013+K05359+K10206+K00549+K00134+K13832+K00826+K01736+K00930+K01663+K01658+K01586+K00134+K01626+…
Genetic Information Processing	Translation	RNA transport	46	197	0.000175557	0.00539838	ko03013	Os01g0620100(OsWD40-19);Os07g0124500(eIF-3c);Os05g0105900(-);Os03g0765400(-);Os05g0104800(EIF3F);Os05g0353400(OsImpbeta1);Os01g0550000(AIP2);Os02g0139200(OsPRMT5);Os03g0177900(rfa3*);Os06g0698674(-);Os11g0606300(-);Os03g0858100(-);Os09g0279500(-);Os05g0256000(OsWD40-116);Os03g0178000(rfa2*);Os02g0146600(eIF-4a);Os01g0746200(NUP85);Os10g0573900(OsNMD3);Os03g0225500(NUP133);Os03g0566800(OsRH34);Os0…	K14299+K03252+K14325+K14307+K03249+K14293+K12812+K02516+K03231+K03262+K03246+K14290+K13126+K03246+K03231+K03257+K14304+K07562+K14300+K13025+K13126+K03257+K03251+K12881+K14004+K14320+K14297+K14319+K03250+K14324+K03242+K03231+K03254+K13126+K03246+K14309+K14313+K00784+K03247+K12812+K03260+K14307+K03248+K03238+K03231+K14312
Metabolism	Amino acid metabolism	Lysine biosynthesis	8	15	0.000341648	0.00840454	ko00300	Os08g0342400(-);Os09g0294000(-);Os02g0436400(-);Os03g0760700(-);Os03g0299900(OsAGD2);Os04g0254000(-);Os03g0195100(OsALD1);Os02g0440000(-)	K12524+K12524+K00215+K00133+K10206+K01714+K10206+K01586
Metabolism	Carbohydrate metabolism	Citrate cycle (TCA cycle)	18	61	0.00109723	0.0224933	ko00020	Os07g0695800(-);Os12g0182200(-);Os01g0337900(-);Os12g0616900(-);Os07g0134800(SDH1);Os01g0300200(-);Os08g0431300(-);Os07g0577700(-);Os09g0509200(-);Os03g0645100(-);Os03g0255500(-);Os03g0136900(-);Os12g0632700(-);Os03g0337900(-);Os11g0538900(-);Os04g0394200(-);Os05g0156700(-);Os01g0649100(OsmMDH)	K00164+K00627+K00382+K00162+K00234+K01648+K00627+K01899+K00162+K00162+K01610+K01681+K00026+K01679+K01647+K00658+K00382+K00026
Metabolism	Global and overview maps	Biosynthesis of secondary metabolites	250	1549	0.00151685	0.0266532	ko01110	Os06g0215600(OsOPR5);Os08g0342400(-);Os07g0162100(-);Os04g0688100(prx59);Os01g0817700(BPM);Os08g0320400(-);Os07g0676900(prx109);Os02g0569400(CYP76M8);Os02g0655300(-);Os02g0570700(Oscyp71Z7);Os01g0963000(prx22);Os07g0695800(-);Os10g0578950(OsACS2);Os02g0187800(GH2);Os08g0120600(-);Os10g0397400(BRD2);Os12g0111800(-);Os12g0182200(-);Os03g0225900(AOS2);Os02g0534400(OSCIN1);Os08g0447000(-);Os07g019100…	K05894+K12524+K10258+K00430+K15633+K01609+K00430+K16084+K01704+K21291+K00430+K00164+K01904+K00083+K01623+K09828+K00430+K00627+K01723+K01193+K00058+K18649+K11262+K00700+K01657+K13065+K14036+K18693+K15397+K09753+K01733+K01817+K00121+K00787+K00800+K16085+K00208+K08241+K00430+K00088+K13070+K00940+K01953+K01824+K00145+K01661+K13496+K05894+K12524+K13496+K01904+K01845+K01783+K01772+K00430+K00850+K01649+…
Genetic Information Processing	Translation	Aminoacyl-tRNA biosynthesis	18	64	0.00200811	0.0308747	ko00970	Os07g0163500(WP1);Os09g0503400(-);Os08g0538000(-);Os01g0185200(-);Os12g0443700(-);Os05g0182800(-);Os01g0120300(-);Os10g0400800(-);Os01g0372700(-);Os08g0295300(-);Os05g0241100(-);Os02g0778200(-);Os03g0694900(OsValRS1);Os12g0540900(-);Os05g0558900(PAL11);Os03g0586800(-);Os04g0643200(-);Os09g0378300(-)	K01873+K01869+K01880+K01886+K01881+K01886+K01869+K01889+K01893+K01868+K01869+K01870+K01873+K01867+K01890+K04567+K02433+K01869
Metabolism	Biosynthesis of other secondary metabolites	Aflatoxin biosynthesis	3	3	0.00264847	0.0361957	ko00254	Os10g0363300(ACC1);Os05g0295300(-);MSTRG.21477(ACC2)	K11262+K11262+K11262
Metabolism	Biosynthesis of other secondary metabolites	Glucosinolate biosynthesis	5	10	0.00693949	0.0853557	ko00966	Os03g0570100(-);Os05g0558400(-);Os04g0174100(-);Os04g0171800(-);Os03g0231600(-)	K12153+K00826+K12153+K12153+K00826
Metabolism	Global and overview maps	2-Oxocarboxylic acid metabolism	17	67	0.00827929	0.0925776	ko01210	Os02g0655300(-);Os03g0617900(-);Os12g0138900(OsIPMS2);Os08g0559600(Dad);Os03g0279400(-);Os03g0655700(-);Os03g0760700(-);Os02g0657600(OsNAGK2);Os03g0570100(-);Os03g0136900(-);Os05g0573700(-);Os05g0558400(-);Os04g0550500(OsNAGK1);Os04g0174100(-);Os04g0171800(-);Os11g0538900(-);Os03g0231600(-)	K01704+K00145+K01649+K01687+K00620+K00052+K00133+K00930+K12153+K01681+K00053+K00826+K00930+K12153+K12153+K01647+K00826
Metabolism	Carbohydrate metabolism	Pyruvate metabolism	22	95	0.00920429	0.094344	ko00620	Os12g0182200(-);Os10g0363300(ACC1);Os12g0138900(OsIPMS2);Os01g0337900(-);Os12g0616900(-);Os09g0252100(-);Os03g0332400(GLYII-2);Os10g0571200(-);Os08g0431300(-);Os05g0295300(-);Os09g0509200(-);Os03g0645100(-);Os03g0255500(-);Os02g0525900(-);Os12g0632700(-);Os11g0186200(OsALDH3H2);Os01g0723400(NADP-ME2);Os03g0337900(-);Os05g0156700(-);Os01g0649100(OsmMDH);Os07g0181000(OsPKpa1);MSTRG.21477(ACC2)	K00627+K11262+K01649+K00382+K00162+K00626+K01069+K00873+K00627+K11262+K00162+K00162+K01610+K01895+K00026+K00128+K00029+K01679+K00382+K00026+K00873+K11262
Metabolism	Carbohydrate metabolism	Propanoate metabolism	10	34	0.0139857	0.132326	ko00640	Os10g0363300(ACC1);Os10g0552900(-);Os01g0337900(-);Os09g0252100(-);Os07g0577700(-);Os05g0295300(-);Os02g0525900(-);Os06g0354500(ACX3);Os05g0156700(-);MSTRG.21477(ACC2)	K11262+K05605+K00382+K00626+K01899+K11262+K01895+K00232+K00382+K11262
Metabolism	Global and overview maps	Carbon metabolism	56	307	0.0160999	0.141449	ko01200	Os01g0817700(BPM);Os07g0695800(-);Os08g0120600(-);Os12g0182200(-);Os08g0447000(-);Os03g0189400(-);Os10g0552900(-);Os09g0505700(-);Os05g0524400(OsPFK05);Os01g0337900(-);Os12g0616900(-);Os09g0252100(-);Os12g0207600(-);Os01g0118000(-);Os04g0485300(OsG6PDH2);Os05g0482700(-);Os04g0650800(-);Os03g0318500(OsG6PDH5);Os06g0256500(Pgi2(Pgib));Os06g0727200(CATB);Os11g0484500(Os6PGDH2);Os02g0127700(-);Os10g0…	K15633+K00164+K01623+K00627+K00058+K00121+K05605+K01783+K00850+K00382+K00162+K00626+K01601+K01623+K00036+K15633+K00058+K00036+K01810+K03781+K00033+K00948+K00873+K00234+K00033+K01810+K00627+K00616+K01899+K00162+K00162+K01610+K00036+K00831+K01895+K01681+K00026+K00134+K01057+K03781+K00029+K00121+K00232+K01679+K00134+K00261+K00134+K00600+K01647+K00616+K00658+K00382+K00026+K00873+K01601+K01601
Metabolism	Carbohydrate metabolism	Pentose phosphate pathway	15	62	0.0195827	0.160578	ko00030	Os08g0120600(-);Os09g0505700(-);Os05g0524400(OsPFK05);Os01g0118000(-);Os04g0485300(OsG6PDH2);Os03g0318500(OsG6PDH5);Os06g0256500(Pgi2(Pgib));Os11g0484500(Os6PGDH2);Os02g0127700(-);Os06g0111500(Os6PGDH1);Os09g0465600(-);Os01g0926300(-);Os02g0600400(OsG6PDH1);Os07g0604000(-);Os08g0154300(-)	K01623+K01783+K00850+K01623+K00036+K00036+K01810+K00033+K00948+K00033+K01810+K00616+K00036+K01057+K00616
Metabolism	Biosynthesis of other secondary metabolites	Monobactam biosynthesis	5	13	0.0248018	0.186196	ko00261	Os08g0342400(-);Os09g0294000(-);Os02g0436400(-);Os03g0760700(-);Os04g0254000(-)	K12524+K12524+K00215+K00133+K01714
Metabolism	Metabolism of terpenoids and polyketides	Diterpenoid biosynthesis	13	53	0.0257344	0.186196	ko00904	Os02g0569400(CYP76M8);Os02g0570700(Oscyp71Z7);Os02g0570400(OsKS7);Os04g0180400(CYP99A2);Os04g0179200(OsMAS);Os02g0630300(OsGA2ox9);Os01g0561600(CYP76M14);Os12g0491800(OsKSL10);Os02g0571900(CYP76M6);Os04g0178300(OsCPS4);Os04g0179700(OsKS4);Os06g0599200(-);Os02g0569900(OsCYP76M7)	K16084+K21291+K14036+K16085+K13070+K04125+K16084+K14037+K21718+K14043+K14046+K16084+K16084
Metabolism	Metabolism of other amino acids	Glutathione metabolism	26	132	0.0373921	0.253041	ko00480	Os03g0709000(-);Os12g0178100(OsAPx6);Os10g0529800(OsGSTU2);Os10g0528900(OsGSTU14);Os04g0485300(OsG6PDH2);Os03g0318500(OsG6PDH5);Os10g0528100(OsGSTU24);Os11g0484500(Os6PGDH2);Os01g0369700(OsGSTF5);Os06g0111500(Os6PGDH1);Os12g0434400(-);Os03g0135300(OsGSTF3);Os02g0600400(OsG6PDH1);Os10g0527800(OsGSTU12);Os04g0448600(-);Os12g0178200(OsAPx5);Os01g0933900(OsGSTF4);Os01g0764000(OsGSTF2);Os10g0530900(Os…	K00799+K00434+K00799+K00799+K00036+K00036+K00799+K00033+K00799+K00033+K01255+K00799+K00036+K00799+K22596+K00434+K00799+K00799+K00799+K00799+K00799+K00799+K00434+K00799+K00799+K00799
Metabolism	Amino acid metabolism	Valine, leucine and isoleucine biosynthesis	7	24	0.0390876	0.253041	ko00290	Os02g0655300(-);Os12g0138900(OsIPMS2);Os08g0559600(Dad);Os03g0655700(-);Os05g0573700(-);Os05g0558400(-);Os03g0231600(-)	K01704+K01649+K01687+K00052+K00053+K00826+K00826
Metabolism	Amino acid metabolism	Phenylalanine, tyrosine and tryptophan biosynthesis	12	54	0.0621207	0.380746	ko00400	Os08g0320400(-);Os03g0264400(OASA2);Os02g0266000(-);Os06g0133900(EPSPS);Os03g0389700(OsDAHPS1);Os06g0632200(TS);Os09g0255400(IGPS);Os10g0523700(ADT);Os01g0375200(DHQDT/SDH);Os03g0254800(CS);Os04g0463500(OASB1);Os07g0622200(OsDAHP1)	K01609+K01657+K01817+K00800+K01626+K06001+K01609+K05359+K13832+K01736+K01658+K01626
Metabolism	Glycan biosynthesis and metabolism	N-Glycan biosynthesis	10	43	0.0650054	0.380746	ko00510	Os03g0216600(-);Os04g0675500(Stt3a);Os03g0821800(-);Os07g0164500(-);Os01g0911200(-);Os05g0519900(-);Os07g0209000(OsDGL1);Os04g0693000(-);Os05g0301500(-);Os04g0397000(dad-1)	K05546+K07151+K00729+K03848+K12667+K07151+K12670+K12666+K12666+K12668
Metabolism	Biosynthesis of other secondary metabolites	Phenylpropanoid biosynthesis	45	266	0.0845542	0.472068	ko00940	Os04g0688100(prx59);Os07g0676900(prx109);Os01g0963000(prx22);Os10g0578950(OsACS2);Os02g0187800(GH2);Os12g0111800(-);Os04g0500700(OsHCT1);Os08g0441500(OsCCR);Os01g0326100(RP-2);Os02g0177600(4CL3);Os04g0688300(prx61);Os02g0240300(prx29);Os08g0543400(-);Os01g0597800(-);Os05g0427400(OsPAL04);Os04g0688500(prx62);Os06g0547400(prx86);Os04g0474900(OsTAGG1);Os04g0688200(prx60);Os02g0240100(prx30);Os05g049…	K00430+K00430+K00430+K01904+K00083+K00430+K13065+K09753+K00430+K01904+K00430+K00430+K13065+K23260+K10775+K00430+K00430+K01188+K00430+K00430+K09754+K00430+K00487+K01904+K01188+K10775+K22395+K00430+K01904+K00430+K00430+K00083+K00430+K13065+K00083+K01904+K09755+K00430+K01188+K00430+K00430+K00430+K01904+K13065+K00083
Metabolism	Glycan biosynthesis and metabolism	Various types of N-glycan biosynthesis	8	34	0.0882729	0.472068	ko00513	Os04g0675500(Stt3a);Os01g0911200(-);Os05g0519900(-);Os07g0209000(OsDGL1);Os04g0693000(-);Os07g0575500(-);Os05g0301500(-);Os04g0397000(dad-1)	K07151+K12667+K07151+K12670+K12666+K12373+K12666+K12668
Metabolism	Biosynthesis of other secondary metabolites	Indole alkaloid biosynthesis	2	4	0.0948862	0.486292	ko00901	Os08g0140300(TDC1);Os08g0140500(OsTDC3)	K01593+K01593
Metabolism	Metabolism of terpenoids and polyketides	Zeatin biosynthesis	9	42	0.117532	0.578259	ko00908	Os04g0556400(-);Os02g0206700(-);Os10g0178500(OsUGT98B3);Os05g0177500(-);Os03g0810100(OsIPT4);Os01g0197700(Gn1a);Os04g0556500(CZOGT1);Os08g0460600(OsCKX11);Os04g0556600(CZOGT2)	K13495+K13496+K13496+K13496+K10760+K00279+K13495+K00279+K13495
Metabolism	Amino acid metabolism	Arginine biosynthesis	8	37	0.130198	0.603715	ko00220	Os03g0617900(-);Os03g0279400(-);Os03g0305500(ASL1);Os02g0657600(OsNAGK2);Os02g0704800(-);Os12g0235800(-);Os04g0550500(OsNAGK1);Os02g0650900(OsGDH3)	K00145+K00620+K01755+K00930+K00611+K01940+K00930+K00261
Metabolism	Lipid metabolism	Linoleic acid metabolism	5	20	0.132523	0.603715	ko00591	Os12g0559200(OsLOX11);Os02g0194700(OsLOX1);Os08g0509100(OsLOX8);Os03g0700700(OsLOX1);Os08g0508800(Lox2:Os:1)	K00454+K00454+K00454+K15718+K00454
Metabolism	Amino acid metabolism	Tryptophan metabolism	15	81	0.14442	0.634414	ko00380	Os04g0183500(-);Os04g0184100(-);Os04g0117900(OsAMI2);Os01g0337900(-);Os09g0252100(-);Os01g0274100(OsYUCCA10);Os06g0727200(CATB);Os08g0140300(TDC1);Os11g0186200(OsALDH3H2);Os02g0115700(CATA1);Os03g0790700(AO);Os08g0140500(OsTDC3);Os04g0394200(-);Os10g0155400(-);Os05g0156700(-)	K01426+K01426+K01426+K00382+K00626+K11816+K03781+K01593+K00128+K03781+K11817+K01593+K00658+K01426+K00382
Metabolism	Amino acid metabolism	Cysteine and methionine metabolism	22	129	0.173349	0.65541	ko00270	Os08g0342400(-);Os08g0447000(-);Os12g0608600(STR22);Os09g0294000(-);Os04g0578000(ACS2);Os04g0650800(-);Os10g0517500(RRJ1);Os01g0580500(ACO7);Os04g0669800(OsMTK);Os03g0760700(-);Os03g0157900(-);Os12g0607000(-);Os12g0624000(-);Os05g0149300(-);Os12g0632700(-);Os05g0149400(ACO5);Os12g0623900(-);Os05g0558400(-);Os05g0135700(OsSAMS1);Os11g0455500(-);Os03g0231600(-);Os01g0649100(OsmMDH)	K12524+K00058+K01011+K12524+K20772+K00058+K01761+K05933+K00899+K00133+K00831+K00547+K00549+K05933+K00026+K05933+K00549+K00826+K00789+K01251+K00826+K00026
Metabolism	Lipid metabolism	Fatty acid biosynthesis	10	52	0.174717	0.65541	ko00061	Os06g0596300(-);Os10g0363300(ACC1);Os04g0643300(-);Os08g0327400(-);Os08g0225000(ZL16);Os05g0295300(-);Os09g0512200(-);Os04g0379900(-);Os03g0297400(-);MSTRG.21477(ACC2)	K10781+K11262+K00648+K00208+K02372+K11262+K01897+K03921+K00645+K11262
Metabolism	Amino acid metabolism	Glycine, serine and threonine metabolism	15	84	0.178958	0.65541	ko00260	Os08g0342400(-);Os01g0817700(BPM);Os08g0447000(-);Os05g0549700(-);Os09g0294000(-);Os01g0337900(-);Os05g0482700(-);Os04g0650800(-);Os06g0632200(TS);Os04g0516600(-);Os03g0760700(-);Os03g0157900(-);Os02g0831800(-);Os12g0409000(OsSHM3);Os05g0156700(-)	K12524+K15633+K00058+K01733+K12524+K00382+K15633+K00058+K06001+K01620+K00133+K00831+K00872+K00600+K00382
Metabolism	Biosynthesis of other secondary metabolites	Stilbenoid, diarylheptanoid and gingerol biosynthesis	6	28	0.182275	0.65541	ko00945	Os04g0500700(OsHCT1);Os08g0543400(-);Os05g0494000(OsC3'H1);Os02g0467600(C4H1);Os02g0611800(OsHCT2);Os04g0664600(-)	K13065+K13065+K09754+K00487+K13065+K13065
Metabolism	Global and overview maps	Fatty acid metabolism	16	91	0.185512	0.65541	ko01212	Os07g0162100(-);Os06g0596300(-);Os10g0363300(ACC1);Os04g0643300(-);Os08g0327400(-);Os09g0252100(-);Os08g0393600(-);Os08g0225000(ZL16);Os07g0417200(OsFAD2-2);Os05g0295300(-);Os09g0512200(-);Os04g0379900(-);Os06g0354500(ACX3);Os03g0297400(-);Os07g0416700(OsFAD2-4);MSTRG.21477(ACC2)	K10258+K10781+K11262+K00648+K00208+K00626+K10703+K02372+K10256+K11262+K01897+K03921+K00232+K00645+K10256+K11262
Metabolism	Amino acid metabolism	Alanine, aspartate and glutamate metabolism	11	59	0.185792	0.65541	ko00250	Os03g0291500(ASN1);Os03g0699300(-);Os03g0305500(ASL1);Os08g0248800(-);Os03g0174500(-);Os03g0313600(-);Os12g0235800(-);Os05g0430800(-);Os03g0236200(OsGAD3);Os02g0650900(OsGDH3);Os01g0873100(-)	K01953+K01939+K01755+K00609+K01939+K01756+K01940+K00764+K01580+K00261+K00764
Metabolism	Glycan biosynthesis and metabolism	Glycosphingolipid biosynthesis - ganglio series	2	6	0.196782	0.65541	ko00604	Os05g0539400(OsBgal9);Os07g0575500(-)	K12309+K12373
Metabolism	Biosynthesis of other secondary metabolites	Betalain biosynthesis	2	6	0.196782	0.65541	ko00965	Os08g0140300(TDC1);Os08g0140500(OsTDC3)	K01593+K01593
Metabolism	Glycan biosynthesis and metabolism	Glycosaminoglycan degradation	4	17	0.200815	0.65541	ko00531	Os02g0802200(-);Os05g0539400(OsBgal9);Os12g0578400(-);Os07g0575500(-)	K07964+K12309+K07964+K12373
Metabolism	Metabolism of cofactors and vitamins	Pantothenate and CoA biosynthesis	7	35	0.202484	0.65541	ko00770	Os08g0559600(Dad);Os07g0485100(-);Os05g0573700(-);Os05g0558400(-);Os11g0311100(-);Os03g0231600(-);Os02g0575200(-)	K01687+K01431+K00053+K00826+K09680+K00826+K01922
Metabolism	Lipid metabolism	alpha-Linolenic acid metabolism	11	61	0.216741	0.677297	ko00592	Os06g0215600(OsOPR5);Os03g0225900(AOS2);Os05g0102000(OsJMT1);Os08g0459600(OPR7);Os12g0559200(OsLOX11);Os02g0194700(OsLOX1);Os02g0110200(HPL3);Os08g0509100(OsLOX8);Os06g0215900(OsOPR4);Os06g0354500(ACX3);Os08g0508800(Lox2:Os:1)	K05894+K01723+K08241+K05894+K00454+K00454+K10528+K00454+K05894+K00232+K00454
Metabolism	Nucleotide metabolism	Purine metabolism	18	107	0.220259	0.677297	ko00230	Os03g0780500(OsCBSIMPDH1);Os02g0625500(-);Os10g0563700(-);Os05g0161500(-);Os03g0699300(-);Os04g0680400(OsALN);Os02g0127700(-);Os10g0571200(-);Os03g0202001(-);Os03g0174500(-);Os03g0313600(-);Os05g0430800(-);Os01g0888500(-);Os08g0326600(-);Os01g0873100(-);Os03g0130400(-);Os01g0199900(-);Os07g0181000(OsPKpa1)	K00088+K00856+K00940+K00951+K01939+K01466+K00948+K00873+K00860+K01939+K01756+K00764+K01952+K01951+K00764+K00939+K11808+K00873
Metabolism	Carbohydrate metabolism	Glycolysis / Gluconeogenesis	26	161	0.225846	0.677539	ko00010	Os01g0817700(BPM);Os08g0120600(-);Os12g0182200(-);Os03g0189400(-);Os05g0524400(OsPFK05);Os01g0337900(-);Os12g0616900(-);Os01g0118000(-);Os05g0482700(-);Os06g0256500(Pgi2(Pgib));Os10g0571200(-);Os09g0465600(-);Os08g0431300(-);Os09g0509200(-);Os03g0645100(-);Os03g0255500(-);Os01g0160100(-);Os02g0525900(-);Os11g0186200(OsALDH3H2);Os02g0601300(OsGapC1);Os03g0189600(-);Os08g0126300(OsGapC3);Os04g04866…	K15633+K01623+K00627+K00121+K00850+K00382+K00162+K01623+K15633+K01810+K00873+K01810+K00627+K00162+K00162+K01610+K01568+K01895+K00128+K00134+K00121+K00134+K00134+K01785+K00382+K00873
Genetic Information Processing	Replication and repair	Mismatch repair	9	55	0.349528	1	ko03430	Os05g0111000(RPA1C);Os03g0128500(OsPoldelta2);Os02g0805200(OsPCNA);Os01g0642900(SSB);Os04g0680700(-);Os02g0592300(OsPMS1);Os02g0633400(RPA2B);Os01g0958900(OsMLH1);MSTRG.18737(--)	K07466+K02328+K04802+K03111+K07456+K10858+K10739+K08734+K07466
Metabolism	Lipid metabolism	Sphingolipid metabolism	6	35	0.354759	1	ko00600	Os10g0492900(-);Os05g0539400(OsBgal9);Os11g0242100(-);Os02g0806900(-);Os06g0226950(DSH1);Os10g0189600(-)	K07407+K12309+K17108+K00654+K04713+K00654
Metabolism	Metabolism of cofactors and vitamins	Biotin metabolism	4	22	0.363681	1	ko00780	Os08g0327400(-);Os08g0225000(ZL16);Os10g0560900(-);Os08g0540100(-)	K00208+K02372+K00652+K01012
Genetic Information Processing	Transcription	RNA polymerase	10	63	0.373153	1	ko03020	Os04g0492300(-);Os06g0603400(-);Os06g0612200(-);Os10g0495600(-);Os01g0679000(-);Os03g0403100(-);MSTRG.18064(rpoC2);MSTRG.21456(rpoA);MSTRG.25008(NRPA1);MSTRG.29379(RE1)	K03018+K03025+K02999+K03002+K03023+K03021+K03046+K03040+K02999+K03006
Metabolism	Carbohydrate metabolism	Glyoxylate and dicarboxylate metabolism	14	92	0.395884	1	ko00630	Os01g0337900(-);Os09g0252100(-);Os12g0207600(-);Os06g0727200(CATB);Os02g0525900(-);Os03g0136900(-);Os12g0632700(-);Os02g0115700(CATA1);Os12g0409000(OsSHM3);Os11g0538900(-);Os05g0156700(-);Os01g0649100(OsmMDH);MSTRG.16908(TIC214);MSTRG.24927(rbcL)	K00382+K00626+K01601+K03781+K01895+K01681+K00026+K03781+K00600+K01647+K00382+K00026+K01601+K01601
Metabolism	Amino acid metabolism	Histidine metabolism	4	23	0.397101	1	ko00340	Os07g0191000(-);Os01g0232700(-);Os11g0186200(OsALDH3H2);Os03g0256400(-)	K18649+K00013+K00128+K01663
Metabolism	Glycan biosynthesis and metabolism	Glycosphingolipid biosynthesis - globo and isoglobo series	2	10	0.41287	1	ko00603	Os10g0492900(-);Os07g0575500(-)	K07407+K12373
Metabolism	Carbohydrate metabolism	C5-Branched dibasic acid metabolism	2	10	0.41287	1	ko00660	Os02g0655300(-);Os03g0655700(-)	K01704+K00052
Metabolism	Metabolism of terpenoids and polyketides	Monoterpenoid biosynthesis	2	10	0.41287	1	ko00902	Os02g0640800(-);Os10g0489500(-)	K15095+K15086
Metabolism	Amino acid metabolism	Valine, leucine and isoleucine degradation	8	52	0.433486	1	ko00280	Os10g0552900(-);Os01g0337900(-);Os09g0252100(-);Os05g0125500(-);Os11g0186200(OsALDH3H2);Os05g0558400(-);Os03g0231600(-);Os05g0156700(-)	K05605+K00382+K00626+K00253+K00128+K00826+K00826+K00382
Metabolism	Carbohydrate metabolism	Galactose metabolism	10	67	0.452115	1	ko00052	Os02g0534400(OSCIN1);Os10g0492900(-);Os05g0539400(OsBgal9);Os05g0524400(OsPFK05);Os03g0808900(-);Os06g0676700(-);Os03g0316200(OsGolS1);Os09g0323000(OsUGE4);Os07g0209100(-);Os10g0155500(-)	K01193+K07407+K12309+K00850+K06617+K01187+K18819+K01784+K06617+K01785
Metabolism	Glycan biosynthesis and metabolism	Other glycan degradation	3	18	0.463925	1	ko00511	Os05g0539400(OsBgal9);Os11g0242100(-);Os07g0575500(-)	K12309+K17108+K12373
Metabolism	Carbohydrate metabolism	Amino sugar and nucleotide sugar metabolism	25	176	0.47906	1	ko00520	Os10g0542900(Cht8);Os04g0608100(GalK2);Os03g0278000(UXS);Os03g0757900(-);Os03g0599800(OsUAM1);Os05g0247100(DIP3);Os11g0700900(C10923);Os04g0493400(Cht4(t)*(Chi4));Os03g0268400(OsMPG3);Os06g0256500(Pgi2(Pgib));Os04g0494100(Cht5);Os06g0726200(Cht1*(Chi1));Os06g0726100(Cht3*);Os11g0592300(-);Os04g0618200(-);Os09g0465600(-);Os01g0687400(-);Os06g0137700(-);Os01g0660200(C10728);Os05g0363200(OsUXS5);Os0…	K20547+K18677+K08678+K00012+K13379+K01183+K01183+K01183+K00966+K01810+K01183+K20547+K20547+K13648+K12448+K01810+K01183+K01711+K01183+K08678+K01784+K12373+K00012+K10046+K08678
Metabolism	Amino acid metabolism	Phenylalanine metabolism	8	55	0.499562	1	ko00360	Os04g0183500(-);Os04g0184100(-);Os04g0117900(OsAMI2);Os05g0427400(OsPAL04);Os08g0140300(TDC1);Os02g0626600(OsPAL05);Os08g0140500(OsTDC3);Os10g0155400(-)	K01426+K01426+K01426+K10775+K01593+K10775+K01593+K01426
Genetic Information Processing	Folding, sorting and degradation	Protein processing in endoplasmic reticulum	33	236	0.505803	1	ko04141	Os09g0482400(OsHsp80.2);Os05g0156500(OsDjB6);Os03g0216600(-);Os05g0156300(PDIL2);Os09g0482600(OsHsp90);Os06g0716700(GRP94);Os04g0675500(Stt3a);Os11g0703900(HSP70);Os06g0634600(-);Os12g0514500(-);Os08g0487800(-);Os03g0276500(OsHsp71.1);Os05g0507300(-);Os04g0432500(PDIL5);Os04g0492500(-);Os11g0199200(ESP2);Os04g0402100(OsCNX);Os03g0831800(OsWD40-95);Os01g0911200(-);Os05g0519900(-);Os03g0648400(OsDj…	K04079+K09517+K05546+K09584+K04079+K09487+K07151+K03283+K14012+K09487+K09487+K03283+K08057+K09580+K16196+K09580+K08054+K14004+K12667+K07151+K09503+K10956+K03283+K13993+K12670+K09584+K12666+K04079+K12666+K08057+K09584+K12668+K09490
Metabolism	Lipid metabolism	Biosynthesis of unsaturated fatty acids	6	41	0.510296	1	ko01040	Os07g0162100(-);Os08g0393600(-);Os07g0417200(OsFAD2-2);Os04g0379900(-);Os06g0354500(ACX3);Os07g0416700(OsFAD2-4)	K10258+K10703+K10256+K03921+K00232+K10256
Metabolism	Carbohydrate metabolism	Ascorbate and aldarate metabolism	9	63	0.515512	1	ko00053	Os12g0178100(OsAPx6);Os07g0191000(-);Os03g0757900(-);Os12g0178200(OsAPx5);Os08g0557600(OsMDAR4);Os11g0186200(OsALDH3H2);Os12g0443500(-);Os11g0591100(OsGME2);Os08g0522400(-)	K00434+K18649+K00012+K00434+K08232+K00128+K00012+K10046+K00434
Metabolism	Energy metabolism	Carbon fixation in photosynthetic organisms	13	93	0.531795	1	ko00710	Os08g0120600(-);Os09g0505700(-);Os12g0207600(-);Os01g0118000(-);Os03g0255500(-);Os12g0632700(-);Os02g0601300(OsGapC1);Os01g0723400(NADP-ME2);Os08g0126300(OsGapC3);Os04g0486600(GAPDH);Os01g0649100(OsmMDH);MSTRG.16908(TIC214);MSTRG.24927(rbcL)	K01623+K01783+K01601+K01623+K01610+K00026+K00134+K00029+K00134+K00134+K00026+K01601+K01601
Metabolism	Amino acid metabolism	Lysine degradation	7	50	0.550103	1	ko00310	Os01g0337900(-);Os09g0252100(-);Os11g0602200(OsSET41);Os04g0423600(OsSET18);Os11g0186200(OsALDH3H2);Os04g0394200(-);Os05g0156700(-)	K00382+K00626+K11420+K11426+K00128+K00658+K00382
Organismal Systems	Environmental adaptation	Plant-pathogen interaction	40	292	0.557804	1	ko04626	Os09g0482400(OsHsp80.2);Os03g0319300(OsCam1-1);Os09g0482600(OsHsp90);Os06g0598800(WSL1);Os06g0716700(GRP94);Os01g0826400(OsWRKY24);Os12g0514500(-);Os05g0474800(OsWRKY70);Os08g0487800(-);Os08g0453700(RbohF);Os11g0229400(-);Os07g0409900(CDPK18);Os02g0205500(-);Os01g0382400(OsPR1#012);Os03g0133400(CEBIP);Os04g0647800(-);Os01g0382000(OsPR1b);Os05g0343400(WRKY53);Os01g0510100(OsMKK6);Os03g0285800(OsMS…	K04079+K02183+K04079+K15397+K09487+K13424+K09487+K13424+K09487+K13447+K13457+K13412+K15397+K13449+K13473+K00864+K13449+K13424+K04368+K20536+K13412+K13457+K13459+K13457+K13459+K13449+K13448+K13457+K13457+K13412+K13412+K02183+K04079+K13448+K13457+K13456+K13412+K02358+K13448+K15397
Metabolism	Metabolism of cofactors and vitamins	Ubiquinone and other terpenoid-quinone biosynthesis	8	58	0.563152	1	ko00130	Os10g0578950(OsACS2);Os01g0662700(-);Os02g0177600(4CL3);Os02g0467600(C4H1);Os01g0901500(OsACS5);Os08g0448000(4CL5);Os07g0280200(OsACS7);Os02g0697400(4CL2)	K01904+K01661+K01904+K00487+K01904+K01904+K01904+K01904
Metabolism	Metabolism of cofactors and vitamins	Porphyrin and chlorophyll metabolism	7	52	0.593782	1	ko00860	Os08g0532200(GSA);Os09g0297000(FC1);Os08g0496000(-);Os01g0286600(PPX);Os01g0527700(-);Os04g0610800(CPO);Os05g0349700(YGL1)	K01845+K01772+K02259+K00231+K02257+K00228+K04040
Metabolism	Metabolism of other amino acids	Cyanoamino acid metabolism	9	67	0.593786	1	ko00460	Os04g0474900(OsTAGG1);Os05g0365600(Os5bglu19);Os12g0512800(OsCYP71E5);Os03g0570100(-);Os04g0474800(Os4bglu12);Os03g0850200(-);Os04g0174100(-);Os12g0409000(OsSHM3);Os04g0171800(-)	K01188+K01188+K13029+K12153+K01188+K13029+K12153+K00600+K12153
Metabolism	Metabolism of cofactors and vitamins	Vitamin B6 metabolism	2	14	0.597073	1	ko00750	Os05g0549700(-);Os03g0157900(-)	K01733+K00831
Metabolism	Metabolism of other amino acids	Selenocompound metabolism	3	22	0.604964	1	ko00450	Os10g0517500(RRJ1);Os12g0624000(-);Os12g0623900(-)	K01761+K00549+K00549
Metabolism	Metabolism of terpenoids and polyketides	Carotenoid biosynthesis	5	38	0.620776	1	ko00906	Os02g0704000(OsNCED1);Os07g0154100(OSNCED3);Os08g0472800(OsABA8OX2);Os02g0703600(OsABA8OX1);Os03g0645900(OsNCED1)	K09840+K09840+K09843+K09843+K09840
Metabolism	Biosynthesis of other secondary metabolites	Flavonoid biosynthesis	8	62	0.641902	1	ko00941	Os04g0500700(OsHCT1);Os08g0543400(-);Os05g0494000(OsC3'H1);Os02g0467600(C4H1);Os04g0630800(-);Os02g0611800(OsHCT2);Os01g0734800(OsUGT706F1);Os04g0664600(-)	K13065+K13065+K09754+K00487+K08695+K13065+K22845+K13065
Metabolism	Energy metabolism	Nitrogen metabolism	5	39	0.644511	1	ko00910	Os01g0547600(NRT2.4);Os04g0412500(OsalphaCA2);Os01g0357100(NiR);Os01g0639900(BETACA1);Os02g0650900(OsGDH3)	K02575+K01674+K00366+K01673+K00261
Genetic Information Processing	Folding, sorting and degradation	Sulfur relay system	2	16	0.671524	1	ko04122	Os12g0608600(STR22);Os12g0588900(-)	K01011+K14169
Metabolism	Lipid metabolism	Ether lipid metabolism	4	33	0.689515	1	ko00565	Os06g0649900(OsPLDvarphi);Os05g0171000(OsPLDalpha2);Os06g0604300(OsPLDalpha5);Os03g0852800(OsNPC3)	K16860+K01115+K01115+K01114
Environmental Information Processing	Signal transduction	MAPK signaling pathway - plant	27	212	0.713778	1	ko04016	Os10g0542900(Cht8);Os03g0319300(OsCam1-1);Os06g0147800(OsMKK1);Os03g0297600(OsPYL/RCAR4);Os10g0563700(-);Os01g0826400(OsWRKY24);Os05g0474800(OsWRKY70);Os08g0453700(RbohF);Os01g0846300(OsPP15);Os04g0578000(ACS2);Os01g0382400(OsPR1#012);Os01g0382000(OsPR1b);Os07g0410700(DERF2);Os03g0268600(OsPP2C30);Os06g0727200(CATB);Os05g0343400(WRKY53);Os06g0708000(BWMK1);Os06g0726200(Cht1*(Chi1));Os03g0285800(O…	K20547+K02183+K20603+K14496+K00940+K13424+K13424+K13447+K14497+K20772+K13449+K13449+K14516+K14497+K03781+K13424+K20538+K20547+K20536+K20547+K13449+K20604+K02183+K03781+K14497+K14496+K14516
Environmental Information Processing	Membrane transport	ABC transporters	6	51	0.727793	1	ko02010	Os04g0209300(OsABCC10);Os04g0209200(OsABCC9);Os01g0695700(OsABCB4);Os01g0173900(OsABCC3);Os04g0693300(-);MSTRG.2635(ABCB11)	K05665+K05665+K05658+K05665+K05681+K05658
Metabolism	Lipid metabolism	Synthesis and degradation of ketone bodies	1	9	0.738874	1	ko00072	Os09g0252100(-)	K00626
Metabolism	Metabolism of other amino acids	Taurine and hypotaurine metabolism	1	9	0.738874	1	ko00430	Os03g0236200(OsGAD3)	K01580
Metabolism	Metabolism of terpenoids and polyketides	Limonene and pinene degradation	1	9	0.738874	1	ko00903	Os11g0186200(OsALDH3H2)	K00128
Cellular Processes	Transport and catabolism	Phagosome	11	93	0.758972	1	ko04145	Os10g0441800(OsRab5A2);Os03g0726100(OsTubA3);Os05g0507300(-);Os04g0402100(OsCNX);Os01g0711000(-);Os03g0213100(-);Os06g0671900(OsTUB3);Os07g0246200(CRO1);Os11g0247300(TID1);Os03g0105600(OsTUB2);Os08g0104700(-)	K07889+K07374+K08057+K08054+K02147+K10956+K07375+K08057+K07374+K07375+K00921
Genetic Information Processing	Replication and repair	Nucleotide excision repair	10	86	0.771067	1	ko03420	Os05g0592400(UV-DDB1);Os04g0637400(-);Os05g0111000(RPA1C);Os03g0128500(OsPoldelta2);Os02g0805200(OsPCNA);Os08g0175300(PolI-like);Os04g0508900(-);Os07g0573600(OsREX1-S);Os02g0633400(RPA2B);MSTRG.18737(--)	K10610+K02335+K07466+K02328+K04802+K02335+K03142+K10845+K10739+K07466
Metabolism	Lipid metabolism	Fatty acid degradation	6	54	0.777769	1	ko00071	Os03g0189400(-);Os09g0252100(-);Os09g0512200(-);Os11g0186200(OsALDH3H2);Os03g0189600(-);Os06g0354500(ACX3)	K00121+K00626+K01897+K00128+K00121+K00232
Metabolism	Lipid metabolism	Fatty acid elongation	5	46	0.783225	1	ko00062	Os07g0162100(-);Os06g0598800(WSL1);Os02g0205500(-);Os08g0393600(-);MSTRG.4776(KCS1)	K10258+K15397+K15397+K10703+K15397
Genetic Information Processing	Replication and repair	DNA replication	8	71	0.785941	1	ko03030	Os04g0637400(-);Os05g0111000(RPA1C);Os03g0128500(OsPoldelta2);Os02g0805200(OsPCNA);Os08g0175300(PolI-like);Os01g0642900(SSB);Os02g0633400(RPA2B);MSTRG.18737(--)	K02335+K07466+K02328+K04802+K02335+K03111+K10739+K07466
Metabolism	Metabolism of cofactors and vitamins	Riboflavin metabolism	2	20	0.786751	1	ko00740	Os03g0117300(-);Os12g0541000(-)	K11752+K00793
Metabolism	Glycan biosynthesis and metabolism	Other types of O-glycan biosynthesis	1	11	0.8063	1	ko00514	Os01g0272600(OsRDN)	K20782
Genetic Information Processing	Replication and repair	Non-homologous end-joining	1	11	0.8063	1	ko03450	Os07g0184900(OsKu70)	K10884
Genetic Information Processing	Transcription	Spliceosome	26	216	0.811121	1	ko03040	Os12g0502200(OsGRP6);Os03g0363800(-);Os11g0703900(HSP70);Os01g0550000(AIP2);Os10g0321700(RBP-159);Os02g0102700(-);Os03g0276500(OsHsp71.1);Os11g0310800(-);Os03g0836200(OsRZ1);Os02g0122800(-);Os02g0586500(-);Os03g0566800(OsRH34);Os10g0466300(OsWD40-178);Os11g0100200(-);Os03g0241200(-);Os12g0244100(OsHsp70CP2);Os07g0608700(-);Os06g0167000(-);Os06g0730800(-);Os01g0549700(AIP1);Os04g0118900(-);Os06g06…	K12741+K12900+K03283+K12812+K12741+K11088+K03283+K12818+K12885+K12893+K11087+K13025+K10599+K12881+K12845+K03283+K11099+K12856+K12871+K12812+K12893+K12857+K12834+K12896+K12741+K11086
Metabolism	Metabolism of other amino acids	beta-Alanine metabolism	5	49	0.828147	1	ko00410	Os10g0552900(-);Os07g0485100(-);Os11g0186200(OsALDH3H2);Os06g0354500(ACX3);Os03g0236200(OsGAD3)	K05605+K01431+K00128+K00232+K01580
Metabolism	Metabolism of cofactors and vitamins	Thiamine metabolism	2	23	0.848231	1	ko00730	Os01g0931400(ROX1);Os03g0130400(-)	K00949+K00939
Genetic Information Processing	Replication and repair	Homologous recombination	9	86	0.860227	1	ko03440	Os04g0637400(-);Os05g0111000(RPA1C);Os01g0106700(-);Os03g0128500(OsPoldelta2);Os08g0175300(PolI-like);Os01g0642900(SSB);Os02g0633400(RPA2B);Os01g0901200(RecA);MSTRG.18737(--)	K02335+K07466+K04728+K02328+K02335+K03111+K10739+K03553+K07466
Genetic Information Processing	Replication and repair	Base excision repair	5	52	0.865205	1	ko03410	Os04g0637400(-);Os03g0128500(OsPoldelta2);Os02g0805200(OsPCNA);Os08g0175300(PolI-like);Os06g0144000(OsXRCC1)	K02335+K02328+K04802+K02335+K10803
Genetic Information Processing	Folding, sorting and degradation	Protein export	6	61	0.86707	1	ko03060	Os05g0509500(-);Os09g0556000(-);Os09g0453400(OsSigP6);Os02g0267000(-);Os03g0213100(-);Os02g0115900(OsBiP1)	K03106+K12948+K03100+K03100+K10956+K09490
Metabolism	Lipid metabolism	Steroid biosynthesis	4	45	0.887715	1	ko00100	Os10g0397400(BRD2);Os01g0103600(-);Os09g0565600(-);Os02g0465400(-)	K09828+K01824+K00222+K00213
Metabolism	Metabolism of terpenoids and polyketides	Brassinosteroid biosynthesis	2	26	0.893151	1	ko00905	Os06g0600400(OsCYP734A4);Os09g0441400(-)	K15639+K20623
Metabolism	Energy metabolism	Photosynthesis	9	92	0.906778	1	ko00195	Os07g0147500(PsbR);Os01g0938100(PSB28);Os03g0835900(OsFd3);Os08g0200300(OsPsbR3);Os07g0147900(-);Os10g0460900(-);Os03g0659200(OsFdC1);gene-psbD(-);gene-psaB(-)	K03541+K08903+K02639+K03541+K02641+K02717+K02639+K02706+K02690
Metabolism	Biosynthesis of other secondary metabolites	Isoquinoline alkaloid biosynthesis	2	29	0.925446	1	ko00950	Os08g0140300(TDC1);Os08g0140500(OsTDC3)	K01593+K01593
Metabolism	Energy metabolism	Sulfur metabolism	3	40	0.929722	1	ko00920	Os12g0608600(STR22);Os03g0202001(-);Os07g0558300(-)	K01011+K00860+K01082
Metabolism	Metabolism of terpenoids and polyketides	Terpenoid backbone biosynthesis	5	60	0.932619	1	ko00900	Os05g0543400(OsFPPS2);Os09g0252100(-);Os01g0695300(-);Os09g0492700(HMGR);Os02g0109100(-)	K00787+K00626+K00787+K00021+K01597
Metabolism	Amino acid metabolism	Arginine and proline metabolism	6	70	0.936104	1	ko00330	Os04g0183500(-);Os04g0184100(-);Os04g0117900(OsAMI2);Os10g0413500(-);Os11g0186200(OsALDH3H2);Os10g0155400(-)	K01426+K01426+K01426+K00472+K00128+K01426
Metabolism	Amino acid metabolism	Tyrosine metabolism	4	51	0.936617	1	ko00350	Os03g0189400(-);Os08g0140300(TDC1);Os03g0189600(-);Os08g0140500(OsTDC3)	K00121+K01593+K00121+K01593
Genetic Information Processing	Translation	mRNA surveillance pathway	12	124	0.937887	1	ko03015	Os05g0105900(-);Os01g0550000(AIP2);Os04g0683100(-);Os09g0279500(-);Os03g0566800(OsRH34);Os09g0115400(OsPABPC1);Os11g0100200(-);Os02g0122000(-);Os04g0504800(OsPABPC3);Os07g0274800(-);Os02g0757900(-);Os01g0549700(AIP1)	K14325+K12812+K14397+K13126+K13025+K13126+K12881+K14324+K13126+K11584+K14396+K12812
Metabolism	Lipid metabolism	Arachidonic acid metabolism	1	19	0.941418	1	ko00590	Os04g0244400(OsGRX12)	K05309
Metabolism	Metabolism of cofactors and vitamins	One carbon pool by folate	1	19	0.941418	1	ko00670	Os12g0409000(OsSHM3)	K00600
Metabolism	Metabolism of terpenoids and polyketides	Sesquiterpenoid and triterpenoid biosynthesis	1	20	0.949558	1	ko00909	Os07g0218200(TPS3)	K15803
Metabolism	Global and overview maps	Metabolic pathways	359	2748	0.953426	1	ko01100	Os06g0215600(OsOPR5);Os08g0342400(-);Os07g0162100(-);Os03g0709000(-);Os04g0688100(prx59);Os02g0802200(-);Os10g0542900(Cht8);Os06g0596300(-);Os01g0817700(BPM);Os12g0178100(OsAPx6);Os08g0320400(-);Os07g0676900(prx109);Os02g0655300(-);Os01g0963000(prx22);Os07g0695800(-);Os04g0183500(-);Os10g0578950(OsACS2);Os02g0187800(GH2);Os10g0529800(OsGSTU2);Os08g0120600(-);Os10g0397400(BRD2);Os12g0111800(-);Os1…	K05894+K12524+K10258+K00799+K00430+K07964+K20547+K10781+K15633+K00434+K01609+K00430+K01704+K00430+K00164+K01426+K01904+K00083+K00799+K01623+K09828+K00430+K00627+K01723+K01193+K00949+K02140+K07407+K00058+K05546+K18677+K18649+K08678+K01011+K11262+K00700+K01657+K13065+K12309+K15397+K09753+K01733+K01817+K00121+K00799+K00648+K00787+K01426+K07151+K00012+K00800+K00208+K00430+K00088+K05605+K00856+K00940+…
Metabolism	Nucleotide metabolism	Pyrimidine metabolism	5	67	0.964937	1	ko00240	Os10g0563700(-);Os07g0485100(-);Os01g0951200(UMPS1);Os08g0248800(-);Os03g0113100(TK)	K00940+K01431+K13421+K00609+K00857
Metabolism	Carbohydrate metabolism	Butanoate metabolism	2	36	0.968676	1	ko00650	Os09g0252100(-);Os03g0236200(OsGAD3)	K00626+K01580
Metabolism	Lipid metabolism	Glycerophospholipid metabolism	11	128	0.975323	1	ko00564	Os09g0308900(-);Os06g0649900(OsPLDvarphi);Os05g0171000(OsPLDalpha2);Os02g0612100(-);Os04g0634700(OsBIDK1);Os03g0101900(-);Os06g0604300(OsPLDalpha5);Os01g0931300(-);Os03g0852800(OsNPC3);Os01g0789100(-);Os08g0359100(-)	K18693+K16860+K01115+K00550+K00901+K01613+K01115+K13511+K01114+K08744+K18693
Genetic Information Processing	Folding, sorting and degradation	RNA degradation	11	128	0.975323	1	ko03018	Os10g0437200(-);Os07g0168000(-);Os09g0252000(-);Os05g0524400(OsPFK05);Os09g0279500(-);Os02g0550700(OsCER7);Os09g0115400(OsPABPC1);Os06g0114000(OsCPn60beta1);Os04g0684900(OsCAF1B);Os09g0491772(OsHsp58.7);Os04g0504800(OsPABPC3)	K12591+K00962+K11600+K00850+K13126+K03678+K13126+K04077+K12581+K04043+K13126
Cellular Processes	Transport and catabolism	Peroxisome	8	102	0.979149	1	ko04146	Os05g0323900(SODA1);Os06g0727200(CATB);Os09g0512200(-);Os07g0609000(-);Os02g0115700(CATA1);Os06g0354500(ACX3);Os03g0265300(-);Os08g0566900(-)	K04564+K03781+K01897+K13346+K03781+K00232+K13354+K13348
Metabolism	Carbohydrate metabolism	Fructose and mannose metabolism	5	73	0.980541	1	ko00051	Os08g0120600(-);Os05g0524400(OsPFK05);Os01g0118000(-);Os03g0268400(OsMPG3);Os06g0137700(-)	K01623+K00850+K01623+K00966+K01711
Metabolism	Lipid metabolism	Glycerolipid metabolism	7	95	0.983653	1	ko00561	Os10g0492900(-);Os09g0308900(-);Os04g0647800(-);Os04g0634700(OsBIDK1);Os01g0142300(SQD2.2);Os11g0186200(OsALDH3H2);Os08g0359100(-)	K07407+K18693+K00864+K00901+K06119+K00128+K18693
Metabolism	Carbohydrate metabolism	Inositol phosphate metabolism	5	77	0.987028	1	ko00562	Os07g0191000(-);Os02g0782600(-);Os03g0852800(OsNPC3);Os08g0104700(-);MSTRG.13264(SAC2)	K18649+K22913+K01114+K00921+K22913
Genetic Information Processing	Folding, sorting and degradation	SNARE interactions in vesicular transport	2	44	0.988776	1	ko04130	Os03g0787000(-);Os11g0168200(RPL3B)	K08486+K08498
Metabolism	Carbohydrate metabolism	Pentose and glucuronate interconversions	5	82	0.992288	1	ko00040	Os03g0757900(-);Os09g0505700(-);Os01g0788400(OsPME6);Os07g0640200(-);Os12g0443500(-)	K00012+K01783+K01051+K00854+K00012
Metabolism	Metabolism of cofactors and vitamins	Folate biosynthesis	1	34	0.993807	1	ko00790	Os03g0111100(-)	K01930
Environmental Information Processing	Signal transduction	Phosphatidylinositol signaling system	5	85	0.994391	1	ko04070	Os03g0319300(OsCam1-1);Os07g0191000(-);Os04g0634700(OsBIDK1);Os01g0267900(OsCam1-3);Os08g0104700(-)	K02183+K18649+K00901+K02183+K00921
Metabolism	Lipid metabolism	Cutin, suberine and wax biosynthesis	1	35	0.99467	1	ko00073	Os06g0254700(-)	K17991
Organismal Systems	Environmental adaptation	Circadian rhythm - plant	2	51	0.995531	1	ko04712	Os06g0601500(OsbZIP48);MSTRG.10139(RUP1)	K16241+K10143
Genetic Information Processing	Transcription	Basal transcription factors	2	60	0.998664	1	ko03022	Os04g0508900(-);Os07g0573600(OsREX1-S)	K03142+K10845
Metabolism	Carbohydrate metabolism	Starch and sucrose metabolism	14	197	0.999113	1	ko00500	Os02g0534400(OSCIN1);Os06g0367100(-);Os07g0662900(OsDPE2);Os06g0256500(Pgi2(Pgib));Os04g0474900(OsTAGG1);Os09g0465600(-);Os06g0676700(-);Os05g0365600(Os5bglu19);Os10g0465700(OsSTA246);Os06g0194900(SUS2);Os08g0409100(OsTPP6);Os06g0643800(OsSPS6);Os04g0474800(Os4bglu12);Os07g0543100(-)	K01193+K00700+K00705+K01810+K01188+K01810+K01187+K01188+K01177+K00695+K01087+K00696+K01188+K01177
Metabolism	Energy metabolism	Oxidative phosphorylation	11	180	0.999748	1	ko00190	Os01g0600000(-);Os03g0352800(-);Os04g0498200(OsCOX6b2);Os01g0711000(-);Os01g0866500(-);Os08g0496000(-);Os04g0656100(AHA7);Os03g0806900(-);Os07g0134800(SDH1);Os01g0527700(-);Os01g0685800(ATPB)	K02140+K03955+K02267+K02147+K01507+K02259+K01535+K00417+K00234+K02257+K02133
Cellular Processes	Transport and catabolism	Endocytosis	10	172	0.999807	1	ko04144	Os10g0441800(OsRab5A2);Os11g0703900(HSP70);Os03g0276500(OsHsp71.1);Os06g0551400(OsRab11);Os05g0171000(OsPLDalpha2);Os02g0738900(BC3);Os03g0801600(-);Os12g0244100(OsHsp70CP2);Os06g0604300(OsPLDalpha5);Os07g0236800(-)	K07889+K03283+K03283+K07904+K01115+K01528+K18468+K03283+K01115+K12191
Environmental Information Processing	Signal transduction	Plant hormone signal transduction	18	280	0.999981	1	ko04075	Os03g0782500(PIL13);Os07g0592600(GH3-8);Os03g0297600(OsPYL/RCAR4);Os01g0846300(OsPP15);Os01g0382400(OsPR1#012);Os01g0382000(OsPR1b);Os07g0410700(DERF2);Os03g0268600(OsPP2C30);Os07g0129200(PR1A);Os01g0813100(HBF2);Os07g0615200(OsJAZ6);Os01g0194300(NH1);Os04g0637000(OsTGAP1);Os02g0643800(OsSAUR11);Os01g0583100(OsPP2C06/OsABI2);Os08g0109400(OsIAA25);Os05g0473000(OsPYL/RCAR6);Os09g0572000(OsERF#087)	K16189+K14487+K14496+K14497+K13449+K13449+K14516+K14497+K13449+K14432+K13464+K14508+K14431+K14488+K14497+K14484+K14496+K14516
Genetic Information Processing	Folding, sorting and degradation	Ubiquitin mediated proteolysis	3	158	1	1	ko04120	Os05g0592400(UV-DDB1);Os10g0466300(OsWD40-178);MSTRG.10139(RUP1)	K10610+K10599+K10143

## Sheet:  ZJ22b-vs-zj-esb
All enrichment pathways of mRNAs of the comparison between ZJ22b and zj-esb.
KEGG_A_class	KEGG_B_class	Pathway	ZJ22b-vs-Pir1b (1394)	All (5841)	Pvalue	Qvalue	Pathway ID	Genes	K_IDs
Metabolism	Global and overview maps	Biosynthesis of secondary metabolites	443	1549	2.84092e-07	3.80683e-05	ko01110	Os07g0677100(POX8.1);Os06g0215600(OsOPR5);Os08g0342400(-);Os10g0524400(OsPLDbeta1);Os06g0726400(SBE1);Os10g0369000(OsERS1);Os04g0486950(-);Os01g0817700(BPM);Os02g0627100(OsPAL1);Os06g0306300(prx78);Os08g0320400(-);Os01g0654500(-);Os06g0274800(prx77);Os07g0676900(prx109);Os02g0569400(CYP76M8);Os02g0570700(Oscyp71Z7);Os01g0963000(prx22);Os03g0126000(-);Os04g0469800(D11);Os05g0526900(OsUGT706D2);Os0…	K00430+K05894+K12524+K01115+K00700+K01885+K01638+K15633+K10775+K00430+K01609+K00031+K00430+K00430+K16084+K21291+K00430+K00766+K12639+K22845+K00164+K13496+K01904+K05917+K00083+K00106+K01698+K16085+K01623+K01193+K00249+K01913+K00430+K00939+K01723+K01193+K00058+K18649+K00895+K21719+K11262+K01057+K00700+K18857+K00430+K01823+K00789+K01657+K13065+K00430+K01214+K14036+K18693+K14682+K09753+K01817+K14038+…
Metabolism	Global and overview maps	Metabolic pathways	733	2748	1.2271e-06	8.2216e-05	ko01100	Os07g0677100(POX8.1);Os06g0215600(OsOPR5);Os11g0588300(OsGSTT1);Os08g0342400(-);Os07g0613000(-);Os10g0524400(OsPLDbeta1);Os02g0802200(-);Os07g0687900(wsi76);Os06g0726400(SBE1);Os05g0367400(-);Os10g0369000(OsERS1);Os12g0107500(-);Os10g0542900(Cht8);Os06g0596300(-);Os04g0486950(-);Os01g0817700(BPM);Os02g0627100(OsPAL1);Os06g0306300(prx78);Os06g0486900(FDH2);Os08g0320400(-);Os01g0654500(-);Os06g0274…	K00430+K05894+K00799+K12524+K00951+K01115+K07964+K18819+K00700+K00949+K01885+K07253+K20547+K10781+K01638+K15633+K10775+K00430+K00122+K01609+K00031+K00430+K00430+K03953+K00430+K09458+K00766+K12639+K01583+K06118+K16871+K00164+K01426+K01904+K05917+K00083+K03952+K00106+K03637+K01698+K01623+K03942+K01193+K00249+K10532+K01913+K00430+K00939+K01723+K01193+K00949+K02140+K00058+K05546+K18649+K07408+K08678+…
Metabolism	Global and overview maps	Biosynthesis of amino acids	96	269	5.41428e-06	0.000241838	ko01230	Os08g0342400(-);Os01g0817700(BPM);Os08g0320400(-);Os01g0654500(-);Os03g0126000(-);Os08g0120600(-);Os08g0447000(-);Os07g0191000(-);Os01g0323600(OsSAM2);Os03g0264400(OASA2);Os03g0431200(-);Os02g0266000(-);Os06g0133900(EPSPS);Os12g0625000(rcs1);Os01g0760600(-);Os09g0539100(DHQS);Os03g0617900(-);Os09g0505700(-);Os05g0524400(OsPFK05);Os10g0405600(OsPFK10);Os12g0138900(OsIPMS2);Os06g0345200(OsNAAT4);Os…	K12524+K15633+K01609+K00031+K00766+K01623+K00058+K18649+K00789+K01657+K14682+K01817+K00800+K01738+K14454+K01735+K00145+K01783+K00850+K00850+K01649+K00815+K00215+K01703+K01623+K01915+K00873+K14455+K01626+K00058+K06001+K22846+K01738+K01687+K00811+K01438+K01733+K00873+K01755+K00052+K15849+K00600+K01620+K01476+K00815+K00616+K01657+K01695+K01658+K10206+K01647+K01738+K01714+K00003+K00611+K00831+K00927+…
Metabolism	Lipid metabolism	Fatty acid degradation	27	54	2.52941e-05	0.000847352	ko00071	Os07g0675000(-);Os05g0529200(-);Os11g0210500(Adh2*);Os01g0348600(-);Os11g0210300(ADH1);Os01g0110400(-);Os02g0817700(OsI57);Os02g0274100(AIM1);Os02g0730000(OsALDH2a);Os05g0317200(LACS8);Os01g0681200(-);Os11g0210600(Adh3);Os06g0346300(-);Os06g0103500(ACX1);Os12g0168700(LACS1);Os10g0159800(-);Os11g0147000(-);Os01g0655800(-);Os06g0270900(OsALDH2B1);Os11g0186200(OsALDH3H2);Os05g0163700(OsACX4);Os10g04…	K00249+K07517+K18857+K10527+K18857+K00626+K07513+K10527+K00128+K01897+K01897+K00001+K00232+K00232+K01897+K00001+K01897+K01897+K00128+K00128+K00232+K07513+K00232+K00001+K00121+K00232+K00128
Metabolism	Carbohydrate metabolism	Propanoate metabolism	19	34	5.74102e-05	0.00153859	ko00640	Os10g0363300(ACC1);Os10g0552900(-);Os01g0110400(-);Os01g0337900(-);Os07g0170100(-);Os02g0621700(-);Os07g0188800(OsALDH6B2);Os07g0577700(-);Os06g0346300(-);Os06g0103500(ACX1);Os09g0394100(-);Os02g0525900(-);Os12g0264500(-);Os01g0314100(-);Os05g0163700(OsACX4);Os01g0159400(-);Os06g0354500(ACX3);Os04g0404800(-);Os06g0594100(OsCRO)	K11262+K05605+K00626+K00382+K00167+K01900+K00140+K01899+K00232+K00232+K01578+K01895+K05605+K09699+K00232+K00232+K00232+K01895+K05605
Metabolism	Global and overview maps	Carbon metabolism	100	307	0.000232437	0.0051911	ko01200	Os04g0486950(-);Os01g0817700(BPM);Os06g0486900(FDH2);Os01g0654500(-);Os07g0695800(-);Os08g0120600(-);Os03g0305100(-);Os08g0447000(-);Os08g0547100(-);Os06g0486800(OsFDH);Os12g0625000(rcs1);Os07g0529000(OsEnS-107);Os10g0552900(-);Os01g0760600(-);Os01g0722700(OsHXK9);Os01g0110400(-);Os09g0505700(-);Os05g0524400(OsPFK05);Os10g0405600(OsPFK10);Os01g0337900(-);Os01g0118000(-);Os08g0434300(MDH);Os08g012…	K01638+K15633+K00122+K00031+K00164+K01623+K01913+K00058+K01057+K00122+K01738+K01637+K05605+K14454+K00844+K00626+K01783+K00850+K00850+K00382+K01623+K00026+K00235+K00036+K00873+K14455+K00058+K01738+K00028+K00036+K03781+K00261+K01602+K00028+K00873+K00627+K00600+K01900+K00140+K01057+K00234+K00033+K00297+K01810+K01595+K00616+K01899+K00232+K00232+K00162+K01647+K01738+K00627+K00036+K01810+K11517+K00831+…
Metabolism	Amino acid metabolism	Phenylalanine, tyrosine and tryptophan biosynthesis	24	54	0.000678321	0.012985	ko00400	Os08g0320400(-);Os03g0126000(-);Os03g0264400(OASA2);Os02g0266000(-);Os06g0133900(EPSPS);Os01g0760600(-);Os09g0539100(DHQS);Os06g0345200(OsNAAT4);Os06g0548000(-);Os03g0389700(OsDAHPS1);Os06g0632200(TS);Os02g0797500(AST);Os01g0871300(-);Os02g0302200(-);Os03g0826500(OASA1);Os07g0182100(OsTSA);Os03g0718000(OASB2);Os09g0255400(IGPS);Os01g0375200(DHQDT/SDH);Os04g0406600(-);Os03g0254800(CS);Os08g0135900…	K01609+K00766+K01657+K01817+K00800+K14454+K01735+K00815+K14455+K01626+K06001+K00811+K15849+K00815+K01657+K01695+K01658+K01609+K13832+K05359+K01736+K01696+K01658+K01626
Metabolism	Lipid metabolism	alpha-Linolenic acid metabolism	26	61	0.000895449	0.0141648	ko00592	Os06g0215600(OsOPR5);Os12g0448900(PIOX);Os03g0225900(AOS2);Os11g0210500(Adh2*);Os01g0348600(-);Os11g0210300(ADH1);Os05g0102000(OsJMT1);Os08g0459600(OPR7);Os02g0218700(HPL2);Os09g0502500(-);Os01g0762000(OspPLAIValpha);Os02g0817700(OsI57);Os02g0274100(AIM1);Os02g0194700(OsLOX1);Os06g0346300(-);Os06g0103500(ACX1);Os02g0110200(HPL3);Os08g0509100(OsLOX8);Os05g0163700(OsACX4);Os06g0215900(OsOPR4);Os10g…	K05894+K10529+K01723+K18857+K10527+K18857+K08241+K05894+K01723+K00224+K14674+K07513+K10527+K00454+K00232+K00232+K10528+K00454+K00232+K05894+K07513+K00232+K10525+K00232+K01723+K00454
Metabolism	Metabolism of other amino acids	beta-Alanine metabolism	22	49	0.000951366	0.0141648	ko00410	Os02g0736400(OsDHODH1);Os10g0552900(-);Os06g0338200(OsDAO1);Os02g0730000(OsALDH2a);Os07g0572100(DAO);Os07g0188800(OsALDH6B2);Os01g0807900(-);Os06g0346300(-);Os06g0103500(ACX1);Os09g0368200(PAOb);Os09g0394100(-);Os03g0720300(GDCi);Os12g0264500(-);Os06g0270900(OsALDH2B1);Os11g0186200(OsALDH3H2);Os05g0163700(OsACX4);Os01g0159400(-);Os06g0354500(ACX3);Os04g0671200(PAO4);Os03g0236200(OsGAD3);Os02g0646…	K00207+K05605+K00276+K00128+K00276+K00140+K01464+K00232+K00232+K13366+K01578+K01580+K05605+K00128+K00128+K00232+K00232+K00232+K17839+K01580+K00128+K05605
Genetic Information Processing	Translation	Ribosome	110	359	0.00146781	0.0196686	ko03010	Os12g0167900(RPL3A);Os11g0151300(OsRPL26.1);Os01g0276000(-);Os03g0356300(-);Os07g0180900(-);Os07g0523500(-);Os02g0103700(-);Os07g0415200(-);Os11g0127900(OsRP1);Os03g0182600(-);Os07g0523700(-);Os05g0565000(RPL18A);Os05g0556900(OsRPL35a.3);Os03g0139100(-);Os04g0413600(-);Os01g0678600(-);Os12g0133050(-);Os03g0843400(-);Os05g0490100(-);Os11g0602500(-);Os05g0477300(-);Os11g0482000(RPS5A);Os07g0450000(…	K02925+K02898+K02908+K02933+K02930+K02929+K02940+K02892+K02960+K02998+K02929+K02882+K02917+K02894+K02955+K02968+K02941+K02990+K02908+K02997+K02976+K02989+K02929+K02938+K02962+K02873+K02943+K02989+K02940+K02936+K02947+K02866+K02969+K02966+K02875+K02976+K02872+K02959+K02975+K02865+K02863+K02873+K02901+K02958+K02957+K02881+K02939+K02934+K02988+K02991+K02971+K02917+K02941+K02953+K02937+K02987+K02981+…
Metabolism	Metabolism of cofactors and vitamins	Porphyrin and chlorophyll metabolism	22	52	0.00244211	0.0297493	ko00860	Os10g0369000(OsERS1);Os06g0704600(ALAD);Os01g0227100(NYC1);Os01g0949400(Se13);Os01g0631200(-);Os08g0532200(GSA);Os09g0297000(FC1);Os02g0168800(PBD);Os03g0654600(NOL);Os10g0389200(OsRCCR1);Os04g0490100(-);Os08g0496000(-);Os01g0527700(-);Os01g0622300(HEME);Os10g0496900(FGL);Os09g0532000(SGR);Os10g0389300(OsRCCR2);Os04g0610800(CPO);Os05g0349700(YGL1);Os02g0121000(-);Os03g0323200(OsChlH);MSTRG.27954(…	K01885+K01698+K13606+K08101+K02303+K01845+K01772+K01749+K13606+K13545+K00231+K02259+K02257+K01599+K00218+K22013+K13545+K00228+K04040+K01885+K03403+K08099
Metabolism	Carbohydrate metabolism	Pyruvate metabolism	35	95	0.00293432	0.0327666	ko00620	Os04g0486950(-);Os03g0305100(-);Os10g0363300(ACC1);Os01g0110400(-);Os12g0138900(OsIPMS2);Os01g0337900(-);Os08g0434300(MDH);Os04g0677500(-);Os10g0503500(-);Os08g0191700(GLYI-11);Os07g0496200(-);Os02g0730000(OsALDH2a);Os12g0145700(-);Os06g0499900(-);Os03g0332400(GLYII-2);Os09g0315700(Osppc2b);Os09g0509200(-);Os06g0105400(-);Os02g0525900(-);Os11g0216000(-);Os12g0632700(-);Os06g0270900(OsALDH2B1);Os0…	K01638+K01913+K11262+K00626+K01649+K00382+K00026+K00873+K00028+K01759+K00028+K00128+K00873+K00627+K01069+K01595+K00162+K00627+K01895+K00873+K00026+K00128+K01759+K00128+K00161+K01595+K00029+K01679+K00873+K01759+K00873+K00128+K01895+K00026+K00873
Metabolism	Amino acid metabolism	Tyrosine metabolism	21	51	0.00447692	0.044244	ko00350	Os12g0107500(-);Os11g0210500(Adh2*);Os11g0210300(ADH1);Os11g0245100(OsGSTZ4);Os01g0760600(-);Os06g0345200(OsNAAT4);Os06g0338200(OsDAO1);Os06g0548000(-);Os02g0797500(AST);Os06g0103300(-);Os01g0871300(-);Os07g0572100(DAO);Os08g0140300(TDC1);Os02g0302200(-);Os11g0210600(Adh3);Os10g0159800(-);Os02g0637700(-);Os03g0189600(-);Os08g0140500(OsTDC3);Os03g0829000(-);Os12g0210300(OsGSTZ2)	K07253+K18857+K18857+K01800+K14454+K00815+K00276+K14455+K00811+K00451+K15849+K00276+K01593+K00815+K00001+K00001+K00001+K00121+K01593+K01557+K01800
Genetic Information Processing	Translation	Aminoacyl-tRNA biosynthesis	25	64	0.00466335	0.044244	ko00970	Os07g0163500(WP1);Os10g0369000(OsERS1);Os09g0503400(-);Os07g0485400(-);Os06g0103600(-);Os03g0111700(-);Os08g0150800(-);Os02g0139600(-);Os08g0538000(-);Os03g0209600(-);Os12g0443700(-);Os04g0680550(-);Os05g0182800(-);Os01g0372700(-);Os08g0295300(-);Os02g0778200(-);Os03g0694900(OsValRS1);Os12g0540900(-);Os05g0558900(PAL11);Os03g0586800(-);Os02g0121000(-);Os04g0643200(-);Os01g0559100(-);Os09g0378300(…	K01873+K01885+K01869+K01893+K14164+K01873+K01866+K22503+K01880+K01874+K01881+K01866+K01886+K01893+K01868+K01870+K01873+K01867+K01890+K04567+K01885+K02433+K01875+K01869+K01872
Metabolism	Carbohydrate metabolism	Citrate cycle (TCA cycle)	24	61	0.00495269	0.044244	ko00020	Os01g0654500(-);Os07g0695800(-);Os01g0337900(-);Os08g0434300(MDH);Os08g0120000(SDHB);Os06g0499900(-);Os02g0621700(-);Os07g0134800(SDH1);Os01g0300200(-);Os07g0577700(-);Os09g0509200(-);Os02g0194100(-);Os06g0105400(-);Os03g0136900(-);Os01g0276100(OsIDHa);Os12g0632700(-);Os02g0739600(OsPDHE1-A);Os04g0479200(-);Os03g0337900(-);Os02g0232400(-);Os01g0248400(-);Os11g0538900(-);Os04g0394200(-);Os01g06491…	K00031+K00164+K00382+K00026+K00235+K00627+K01900+K00234+K01648+K01899+K00162+K01647+K00627+K01681+K00030+K00026+K00161+K00030+K01679+K01647+K00031+K01647+K00658+K00026
Metabolism	Glycan biosynthesis and metabolism	Various types of N-glycan biosynthesis	15	34	0.00732476	0.0613449	ko00513	Os08g0472600(OsFUT11);Os04g0675500(Stt3a);Os12g0170600(-);Os01g0911200(-);Os05g0519900(-);Os06g0229200(-);Os06g0245700(-);Os07g0209000(OsDGL1);Os04g0693000(-);Os05g0209100(-);Os04g0606400(-);Os02g0577300(-);Os07g0575500(-);Os05g0301500(-);Os04g0397000(dad-1)	K00753+K07151+K14412+K12667+K07151+K14413+K01231+K12670+K12666+K23741+K01230+K14413+K12373+K12666+K12668
Metabolism	Metabolism of other amino acids	Glutathione metabolism	44	132	0.00808694	0.0637441	ko00480	Os11g0588300(OsGSTT1);Os01g0654500(-);Os04g0457500(-);Os01g0371500(OsGSTF10);Os01g0949700(OsGSTU7);Os02g0813500(OsGR2);Os10g0529500(OsGSTU30);Os10g0527400(OsGSTU19);Os04g0485300(OsG6PDH2);Os03g0318500(OsG6PDH5);Os10g0528100(OsGSTU24);Os01g0966000(-);Os01g0369700(OsGSTF5);Os03g0285700(OsAPX1);Os06g0168600(V3);Os08g0562700(-);Os03g0358100(OsGpx2);Os06g0111500(Os6PGDH1);Os10g0529400(OsGSTU9);Os12g04…	K00799+K00031+K00681+K00799+K00799+K00383+K00799+K00799+K00036+K00036+K00799+K01469+K00799+K00434+K10807+K01256+K00432+K00033+K00799+K01255+K00383+K21456+K00036+K00799+K00799+K00434+K00799+K00797+K00799+K00799+K00799+K00434+K00383+K00799+K00799+K00799+K00799+K00799+K00434+K00031+K00799+K00799+K00799+K00799
Metabolism	Global and overview maps	2-Oxocarboxylic acid metabolism	25	67	0.00918109	0.0683481	ko01210	Os01g0654500(-);Os03g0431200(-);Os01g0760600(-);Os03g0617900(-);Os12g0138900(OsIPMS2);Os02g0125100(-);Os06g0548000(-);Os08g0559600(Dad);Os02g0797500(AST);Os02g0690800(-);Os03g0655700(-);Os02g0194100(-);Os03g0570100(-);Os03g0136900(-);Os05g0573700(-);Os01g0276100(OsIDHa);Os04g0479200(-);Os05g0129100(-);Os10g0390500(ALAAT);Os04g0174100(-);Os02g0232400(-);Os04g0171800(-);Os01g0248400(-);Os11g0538900…	K00031+K14682+K14454+K00145+K01649+K01703+K14455+K01687+K00811+K01438+K00052+K01647+K12153+K01681+K00053+K00030+K00030+K00818+K00814+K12153+K01647+K12153+K00031+K01647+K00826
Metabolism	Amino acid metabolism	Phenylalanine metabolism	21	55	0.0121931	0.0859936	ko00360	Os12g0107500(-);Os02g0627100(OsPAL1);Os04g0183500(-);Os04g0184100(-);Os02g0626400(OsPAL);Os01g0760600(-);Os04g0117900(OsAMI2);Os06g0345200(OsNAAT4);Os02g0626100(OsPAL);Os06g0338200(OsDAO1);Os06g0548000(-);Os05g0427400(OsPAL04);Os02g0797500(AST);Os01g0871300(-);Os07g0572100(DAO);Os08g0140300(TDC1);Os02g0302200(-);Os04g0518400(OsPAL07);Os02g0626600(OsPAL05);Os01g0796400(-);Os08g0140500(OsTDC3)	K07253+K10775+K01426+K01426+K10775+K14454+K01426+K00815+K13064+K00276+K14455+K10775+K00811+K15849+K00276+K01593+K00815+K10775+K10775+K00074+K01593
Metabolism	Nucleotide metabolism	Purine metabolism	36	107	0.013397	0.08976	ko00230	Os07g0613000(-);Os03g0429800(-);Os04g0671100(-);Os11g0125900(-);Os03g0780500(OsCBSIMPDH1);Os02g0625500(-);Os10g0563700(-);Os09g0442600(-);Os05g0595400(OsNDPK3);Os04g0677500(-);Os05g0161500(-);Os12g0120400(-);Os12g0145700(-);Os06g0168600(V3);Os12g0123500(-);Os01g0865100(-);Os08g0436100(-);Os03g0174500(-);Os03g0313600(-);Os11g0216000(-);Os07g0492000(OsNDPK1);Os12g0597500(OsUAH);Os12g0236400(ADK-A);…	K00951+K00106+K00939+K14641+K00088+K00856+K00940+K00951+K00940+K00873+K00951+K01522+K00873+K10807+K14641+K00365+K01510+K01939+K01756+K00873+K00940+K18151+K00939+K00951+K01952+K00759+K00873+K00856+K01951+K00940+K00873+K01517+K00764+K01933+K11808+K00873
Metabolism	Amino acid metabolism	Alanine, aspartate and glutamate metabolism	22	59	0.0141522	0.0903043	ko00250	Os02g0112900(OsGABA-T);Os05g0536400(-);Os01g0760600(-);Os04g0650700(OsASNase2);Os12g0131100(-);Os02g0735200(OsGS1);Os06g0548000(-);Os08g0205900(-);Os04g0543900(OsGDH2);Os02g0797500(AST);Os03g0305500(ASL1);Os04g0614500(-);Os03g0174500(-);Os03g0597600(OsASNase1);Os03g0313600(-);Os03g0720300(GDCi);Os12g0235800(-);Os04g0614600(OSL2);Os10g0390500(ALAAT);Os03g0236200(OsGAD3);Os02g0650900(OsGDH3);Os01g0…	K16871+K00294+K14454+K13051+K00820+K01915+K14455+K16871+K00261+K00811+K01755+K16871+K01939+K13051+K01756+K01580+K01940+K16871+K00814+K01580+K00261+K00764
Metabolism	Metabolism of terpenoids and polyketides	Diterpenoid biosynthesis	20	53	0.016382	0.09949	ko00904	Os02g0569400(CYP76M8);Os02g0570700(Oscyp71Z7);Os04g0178400(-);Os06g0569500(KO4);Os02g0570400(OsKS7);Os02g0571300(OsKS5);Os04g0180400(CYP99A2);Os04g0179200(OsMAS);Os01g0561600(CYP76M14);Os12g0491800(OsKSL10);Os02g0571900(CYP76M6);Os02g0571100(OsCPS2);Os04g0178300(OsCPS4);Os04g0179700(OsKS4);Os06g0599200(-);Os06g0568600(OsKO5);Os02g0569900(OsCYP76M7);Os04g0611800(OsKS1);Os11g0474800(OsKS8);Os05g056…	K16084+K21291+K16085+K21719+K14036+K14038+K16085+K13070+K16084+K14037+K21718+K04120+K14043+K14046+K16084+K04122+K16084+K04121+K14044+K04125
Metabolism	Global and overview maps	Fatty acid metabolism	31	91	0.0172915	0.09949	ko01212	Os06g0596300(-);Os07g0616200(-);Os07g0675000(-);Os10g0363300(ACC1);Os01g0348600(-);Os08g0327400(-);Os01g0110400(-);Os08g0393600(-);Os07g0417200(OsFAD2-2);Os02g0817700(OsI57);Os02g0274100(AIM1);Os05g0317200(LACS8);Os01g0681200(-);Os06g0346300(-);Os06g0103500(ACX1);Os12g0168700(LACS1);Os04g0116600(-);Os07g0416900(OsFAD2-3);Os06g0299100(-);Os11g0147000(-);Os01g0655800(-);Os04g0379900(-);Os05g0163700…	K10781+K09458+K00249+K11262+K10527+K00208+K00626+K10703+K10256+K07513+K10527+K01897+K01897+K00232+K00232+K01897+K10251+K10256+K10251+K01897+K01897+K03921+K00232+K07513+K00232+K03921+K00232+K10256+K09458+K01074+K00059
Metabolism	Amino acid metabolism	Arginine biosynthesis	15	37	0.0178191	0.09949	ko00220	Os03g0431200(-);Os01g0760600(-);Os03g0617900(-);Os02g0735200(OsGS1);Os06g0548000(-);Os04g0543900(OsGDH2);Os02g0797500(AST);Os02g0690800(-);Os03g0305500(ASL1);Os04g0106300(OsARG);Os02g0704800(-);Os12g0235800(-);Os05g0129100(-);Os10g0390500(ALAAT);Os02g0650900(OsGDH3)	K14682+K14454+K00145+K01915+K14455+K00261+K00811+K01438+K01755+K01476+K00611+K01940+K00818+K00814+K00261
Metabolism	Amino acid metabolism	Cysteine and methionine metabolism	41	129	0.0236861	0.126957	ko00270	Os08g0342400(-);Os08g0447000(-);Os12g0608600(STR22);Os03g0161800(Sip2A);Os01g0323600(OsSAM2);Os12g0625000(rcs1);Os01g0760600(-);Os09g0451000(ACO1);Os06g0112200(OsMTN);Os06g0345200(OsNAAT4);Os04g0578000(ACS2);Os08g0434300(MDH);Os06g0548000(-);Os04g0650800(-);Os03g0727600(ACS1);Os01g0814800(-);Os10g0517500(RRJ1);Os06g0149900(-);Os01g0580500(ACO7);Os04g0669800(OsMTK);Os02g0797500(AST);Os02g0302200(-…	K12524+K00058+K01011+K08967+K00789+K01738+K14454+K05933+K01244+K00815+K20772+K00026+K14455+K00058+K01762+K22846+K01761+K01738+K05933+K00899+K00811+K00815+K01738+K21456+K00003+K00831+K01738+K00549+K01611+K00797+K00026+K00549+K05933+K01762+K08967+K23977+K00789+K01251+K00826+K00026+K16054
Metabolism	Amino acid metabolism	Valine, leucine and isoleucine degradation	19	52	0.0270639	0.139483	ko00280	Os07g0675000(-);Os10g0552900(-);Os01g0110400(-);Os01g0337900(-);Os02g0817700(OsI57);Os07g0170100(-);Os05g0125500(-);Os02g0730000(OsALDH2a);Os07g0188800(OsALDH6B2);Os01g0269000(-);Os08g0544900(-);Os12g0264500(-);Os06g0270900(OsALDH2B1);Os01g0314100(-);Os11g0186200(OsALDH3H2);Os10g0457600(-);Os02g0646500(OS-ALDH);Os03g0231600(-);Os06g0594100(OsCRO)	K00249+K05605+K00626+K00382+K07513+K00167+K00253+K00128+K00140+K01640+K01641+K05605+K00128+K09699+K00128+K07513+K00128+K00826+K05605
Cellular Processes	Transport and catabolism	Peroxisome	33	102	0.0308918	0.147918	ko04146	Os01g0654500(-);Os03g0429800(-);Os09g0133200(-);Os03g0829100(-);Os06g0115400(OsFSD1.1);Os02g0817700(OsI57);Os05g0323900(SODA1);Os06g0727200(CATB);Os03g0708100(OMT7);Os07g0665200(Cu/Zn-SOD);Os01g0505400(-);Os01g0269000(-);Os05g0317200(LACS8);Os01g0681200(-);Os06g0346300(-);Os01g0925200(-);Os06g0103500(ACX1);Os12g0168700(LACS1);Os09g0394100(-);Os07g0616500(GLO5);Os11g0147000(-);Os01g0655800(-);Os05…	K00031+K00106+K11147+K08726+K04564+K07513+K04564+K03781+K00477+K04565+K12261+K01640+K01897+K01897+K00232+K12663+K00232+K01897+K01578+K11517+K01897+K01897+K00232+K03781+K04565+K07513+K00232+K00232+K13356+K00031+K11517+K13354+K13348
Metabolism	Carbohydrate metabolism	Glycolysis / Gluconeogenesis	49	161	0.0318095	0.147918	ko00010	Os01g0817700(BPM);Os08g0120600(-);Os03g0305100(-);Os08g0345700(OsPFPA3);Os11g0210500(Adh2*);Os11g0210300(ADH1);Os01g0722700(OsHXK9);Os05g0524400(OsPFK05);Os10g0405600(OsPFK10);Os01g0337900(-);Os01g0118000(-);Os04g0677500(-);Os01g0847800(AKR3);Os08g0241600(-);Os02g0730000(OsALDH2a);Os12g0145700(-);Os06g0499900(-);Os03g0818100(-);Os09g0465600(-);Os04g0458600(-);Os11g0210600(Adh3);Os09g0509200(-);Os…	K15633+K01623+K01913+K00895+K18857+K18857+K00844+K00850+K00850+K00382+K01623+K00873+K00002+K01792+K00128+K00873+K00627+K03103+K01810+K01785+K00001+K00162+K00627+K00001+K01810+K00927+K01568+K01895+K00895+K00873+K00128+K00128+K00161+K00850+K01689+K01792+K00001+K00121+K00873+K00134+K00873+K01689+K00128+K01785+K01895+K01623+K01689+K00873+K01568
Metabolism	Carbohydrate metabolism	Amino sugar and nucleotide sugar metabolism	53	176	0.032012	0.147918	ko00520	Os10g0542900(Cht8);Os05g0387200(-);Os03g0278000(UXS);Os01g0860400(-);Os07g0674100(OsUXS6);Os03g0757900(-);Os05g0580000(OsAGPL3);Os03g0599800(OsUAM1);Os01g0722700(OsHXK9);Os05g0247100(DIP3);Os01g0860500(C10501);Os12g0131100(-);Os06g0702500(OsARA1);Os11g0700900(C10923);Os03g0115100(-);Os04g0493400(Cht4(t)*(Chi4));Os12g0128700(-);Os10g0363100(-);Os03g0268400(OsMPG3);Os03g0320100(-);Os03g0278200(-);O…	K20547+K06118+K08678+K01183+K08678+K00012+K00975+K13379+K00844+K01183+K01183+K00820+K12446+K01183+K05305+K01183+K01209+K13648+K00966+K01209+K12450+K20547+K13648+K20547+K12448+K01810+K08678+K01209+K01183+K01209+K01810+K01183+K00326+K00975+K01183+K08678+K00326+K13648+K01784+K12373+K01836+K00012+K01784+K10046+K00972+K00975+K16190+K00012+K08679+K00847+K08678+K02377+K02377
Metabolism	Lipid metabolism	Biosynthesis of unsaturated fatty acids	15	41	0.0460039	0.205484	ko01040	Os08g0393600(-);Os07g0417200(OsFAD2-2);Os02g0817700(OsI57);Os06g0346300(-);Os06g0103500(ACX1);Os04g0116600(-);Os07g0416900(OsFAD2-3);Os06g0299100(-);Os04g0379900(-);Os05g0163700(OsACX4);Os10g0457600(-);Os01g0159400(-);Os03g0423300(-);Os06g0354500(ACX3);Os07g0416700(OsFAD2-4)	K10703+K10256+K07513+K00232+K00232+K10251+K10256+K10251+K03921+K00232+K07513+K00232+K03921+K00232+K10256
Metabolism	Biosynthesis of other secondary metabolites	Flavonoid biosynthesis	21	62	0.0475778	0.205659	ko00941	Os05g0526900(OsUGT706D2);Os04g0500700(OsHCT1);Os01g0735900(OsUGT706B1);Os08g0543400(-);Os05g0320700(C4H2);Os05g0494000(OsC3'H1);Os02g0467600(C4H1);Os10g0116400(-);Os04g0630800(-);Os01g0736100(OsUGT706C1);Os04g0630400(-);Os05g0527000(OsUGT706C3);Os11g0116300(CHI);Os04g0662600(OsF3H-1);Os02g0611800(OsHCT2);Os04g0103900(CHS);Os06g0626700(-);Os12g0240900(NOMT);Os01g0734800(OsUGT706F1);Os04g0664600(-)…	K22845+K13065+K22845+K13065+K00487+K09754+K00487+K22845+K08695+K22845+K08695+K22845+K01859+K00475+K13065+K00660+K05277+K22440+K22845+K13065+K09754
Metabolism	Lipid metabolism	Sphingolipid metabolism	13	35	0.0542706	0.227258	ko00600	Os05g0539400(OsBgal9);Os11g0242100(-);Os03g0264000(-);Os11g0516000(OsLCB2a3);Os02g0581300(-);Os01g0624000(-);Os02g0806900(-);Os01g0100900(SPL1);Os06g0226950(DSH1);Os10g0189600(-);Os02g0656200(OsCERK);Os07g0679300(alpha-Gal);MSTRG.7056(Os05g0567100)	K12309+K17108+K23727+K00654+K23727+K12349+K00654+K01634+K04713+K00654+K04715+K07407+K04718
Metabolism	Biosynthesis of other secondary metabolites	Caffeine metabolism	2	2	0.0569264	0.231156	ko00232	Os03g0429800(-);Os01g0865100(-)	K00106+K00365
Cellular Processes	Transport and catabolism	Phagosome	29	93	0.0640174	0.250427	ko04145	Os01g0282800(OsTUB1);Os10g0441800(OsRab5A2);Os03g0791500(-);Os03g0726100(OsTubA3);Os01g0659200(v-ATP-E);Os06g0662000(PLS1);Os06g0198800(-);Os02g0178400(-);Os05g0516600(OsRab7B3);Os04g0402100(OsCNX);Os06g0568200(OsVHA-B);Os11g0169900(-);Os06g0259000(-);Os03g0666500(OsRab5B1);Os12g0168900(-);Os08g0254500(-);Os01g0834200(-);Os03g0213100(-);Os01g0610100(-);Os06g0671900(OsTUB3);Os07g0574800(OsTubA1);O…	K07375+K07889+K08517+K07374+K02150+K02145+K08517+K07342+K07897+K08054+K02147+K02155+K00921+K07889+K02155+K10956+K02154+K10956+K03661+K07375+K07374+K07342+K07375+K08057+K02148+K04392+K07374+K07375+K00921
Metabolism	Biosynthesis of other secondary metabolites	Glucosinolate biosynthesis	5	10	0.06541	0.250427	ko00966	Os02g0125100(-);Os03g0570100(-);Os04g0174100(-);Os04g0171800(-);Os03g0231600(-)	K01703+K12153+K12153+K12153+K00826
Metabolism	Glycan biosynthesis and metabolism	Glycosaminoglycan degradation	7	17	0.0868271	0.32319	ko00531	Os02g0802200(-);Os05g0155700(-);Os05g0539400(OsBgal9);Os01g0931100(-);Os11g0543500(-);Os06g0179000(-);Os07g0575500(-)	K07964+K10532+K12309+K10532+K10532+K07964+K12373
Metabolism	Amino acid metabolism	Arginine and proline metabolism	22	70	0.0907621	0.328706	ko00330	Os06g0131300(ADC1);Os04g0183500(-);Os04g0184100(-);Os05g0536400(-);Os01g0760600(-);Os04g0117900(OsAMI2);Os06g0548000(-);Os10g0550900(OsProDH);Os02g0797500(AST);Os02g0730000(OsALDH2a);Os04g0106300(OsARG);Os09g0368200(PAOb);Os09g0424300(SAMDC1);Os05g0513900(-);Os06g0528600(OSSPDS2);Os06g0270900(OsALDH2B1);Os11g0186200(OsALDH3H2);Os05g0489100(-);Os04g0671200(PAO4);Os03g0803500(-);Os02g0646500(OS-ALD…	K01583+K01426+K01426+K00294+K14454+K01426+K14455+K00318+K00811+K00128+K01476+K13366+K01611+K01259+K00797+K00128+K00128+K00472+K17839+K00472+K00128+K00819
Metabolism	Metabolism of other amino acids	Cyanoamino acid metabolism	21	67	0.099162	0.349677	ko00460	Os04g0457500(-);Os06g0683300(Os6bglu25);Os04g0650700(OsASNase2);Os03g0212800(Os3bglu6);Os04g0474900(OsTAGG1);Os11g0455800(OsSHM2);Os05g0366600(Os5bglu22);Os03g0749500(-);Os12g0512800(OsCYP71E5);Os03g0570100(-);Os03g0597600(OsASNase1);Os03g0703100(Os3bglu8);Os03g0749300(OsBGLU1);Os03g0703000(Os3bglu7);Os04g0474800(Os4bglu12);Os03g0850200(-);Os02g0635000(OsNIT1);Os04g0174100(-);Os12g0409000(OsSHM3)…	K00681+K01188+K13051+K01188+K01188+K00600+K01188+K01188+K13029+K12153+K13051+K05350+K05349+K05350+K01188+K13029+K13035+K12153+K00600+K12153+K05350
Metabolism	Lipid metabolism	Glycerolipid metabolism	28	95	0.121938	0.413088	ko00561	Os05g0387200(-);Os09g0308900(-);Os07g0100300(SQD2.1);Os05g0280500(GPAT);Os12g0100500(-);Os01g0762000(OspPLAIValpha);Os04g0647800(-);Os04g0634700(OsBIDK1);Os06g0563900(-);Os01g0847800(AKR3);Os02g0730000(OsALDH2a);Os01g0783200(-);Os02g0539100(-);Os08g0359200(-);Os11g0679700(OsGPAT3);Os02g0714100(OsDGAT);Os06g0270900(OsALDH2B1);Os11g0615000(-);Os11g0186200(OsALDH3H2);Os11g0100600(-);Os05g0196800(OsD…	K06118+K18693+K06119+K13508+K01054+K14674+K00864+K00901+K11155+K00002+K00128+K00901+K09480+K18693+K13508+K22848+K00128+K15728+K00128+K01054+K11155+K15728+K18693+K18693+K00128+K13519+K13506+K07407
Metabolism	Amino acid metabolism	Lysine biosynthesis	6	15	0.124257	0.413088	ko00300	Os08g0342400(-);Os02g0436400(-);Os03g0299900(OsAGD2);Os04g0254000(-);Os11g0128800(-);Os03g0195100(OsALD1)	K12524+K00215+K10206+K01714+K00003+K10206
Metabolism	Carbohydrate metabolism	Butanoate metabolism	12	36	0.128435	0.413088	ko00650	Os02g0112900(OsGABA-T);Os03g0305100(-);Os01g0110400(-);Os08g0205900(-);Os01g0269000(-);Os04g0614500(-);Os08g0544900(-);Os03g0720300(GDCi);Os04g0614600(OSL2);Os02g0562700(OsGLYR1);Os01g0796400(-);Os03g0236200(OsGAD3)	K16871+K01913+K00626+K16871+K01640+K16871+K01641+K01580+K16871+K18121+K00074+K01580
Metabolism	Biosynthesis of other secondary metabolites	Isoquinoline alkaloid biosynthesis	10	29	0.131357	0.413088	ko00950	Os01g0760600(-);Os06g0345200(OsNAAT4);Os06g0338200(OsDAO1);Os06g0548000(-);Os02g0797500(AST);Os01g0871300(-);Os07g0572100(DAO);Os08g0140300(TDC1);Os02g0302200(-);Os08g0140500(OsTDC3)	K14454+K00815+K00276+K14455+K00811+K15849+K00276+K01593+K00815+K01593
Metabolism	Carbohydrate metabolism	Pentose phosphate pathway	19	62	0.134564	0.413088	ko00030	Os08g0120600(-);Os08g0345700(OsPFPA3);Os08g0547100(-);Os09g0505700(-);Os05g0524400(OsPFK05);Os10g0405600(OsPFK10);Os01g0118000(-);Os04g0485300(OsG6PDH2);Os03g0318500(OsG6PDH5);Os09g0529100(-);Os06g0111500(Os6PGDH1);Os09g0465600(-);Os01g0926300(-);Os02g0600400(OsG6PDH1);Os03g0776000(Pgi1(Pgia));Os04g0306400(OsRPI);Os09g0298100(OsPFPA4);Os01g0191700(OsPFK01);Os12g0169600(-)	K01623+K00895+K01057+K01783+K00850+K00850+K01623+K00036+K00036+K01057+K00033+K01810+K00616+K00036+K01810+K01807+K00895+K00850+K01623
Genetic Information Processing	Translation	RNA transport	54	197	0.135641	0.413088	ko03013	Os01g0620100(OsWD40-19);Os07g0124500(eIF-3c);Os08g0427900(-);Os09g0326900(BIP107);Os05g0104800(EIF3F);Os05g0353400(OsImpbeta1);Os01g0550000(AIP2);Os02g0139200(OsPRMT5);Os03g0177900(rfa3*);Os06g0698674(-);Os01g0959000(-);Os03g0858100(-);Os09g0279500(-);Os04g0608400(-);Os12g0131300(-);Os10g0536000(OsSce1);Os07g0681000(-);Os01g0746200(NUP85);Os07g0685400(-);Os03g0225500(NUP133);Os12g0617100(-);Os09g…	K14299+K03252+K12881+K03262+K03249+K14293+K12812+K02516+K03231+K03262+K14325+K14290+K13126+K14318+K14320+K10577+K03238+K14304+K14317+K14300+K03680+K13126+K03257+K14320+K14297+K03113+K03250+K03250+K03113+K03242+K03231+K03254+K07936+K14297+K13126+K03246+K10577+K14320+K14309+K14313+K00784+K03259+K03247+K14307+K14297+K03238+K03260+K03231+K14326+K14289+K03113+K14312+K05749+K14289
Metabolism	Metabolism of terpenoids and polyketides	Limonene and pinene degradation	4	9	0.145019	0.431835	ko00903	Os02g0730000(OsALDH2a);Os06g0270900(OsALDH2B1);Os11g0186200(OsALDH3H2);Os02g0646500(OS-ALDH)	K00128+K00128+K00128+K00128
Metabolism	Biosynthesis of other secondary metabolites	Betalain biosynthesis	3	6	0.151801	0.442202	ko00965	Os01g0878800(-);Os08g0140300(TDC1);Os08g0140500(OsTDC3)	K15777+K01593+K01593
Metabolism	Nucleotide metabolism	Pyrimidine metabolism	20	67	0.155725	0.443983	ko00240	Os11g0125900(-);Os02g0736400(OsDHODH1);Os10g0563700(-);Os09g0567900(-);Os07g0213500(-);Os05g0595400(OsNDPK3);Os01g0654100(-);Os01g0951200(UMPS1);Os06g0168600(V3);Os12g0123500(-);Os01g0807900(-);Os08g0436100(-);Os07g0492000(OsNDPK1);Os01g0712700(-);Os03g0113100(TK);Os05g0573300(-);Os08g0557900(-);Os12g0548300(OsNDPK2);Os01g0965400(YGL8);Os08g0530000(-)	K14641+K00207+K00940+K01240+K01520+K00940+K01937+K13421+K10807+K14641+K01464+K01510+K00940+K01489+K00857+K01937+K01240+K00940+K09903+K00876
Metabolism	Amino acid metabolism	Histidine metabolism	8	23	0.161281	0.450242	ko00340	Os07g0191000(-);Os02g0730000(OsALDH2a);Os01g0232700(-);Os06g0270900(OsALDH2B1);Os11g0186200(OsALDH3H2);Os03g0256400(-);Os02g0646500(OS-ALDH);Os05g0511300(-)	K18649+K00128+K00013+K00128+K00128+K01663+K00128+K19787
Metabolism	Metabolism of terpenoids and polyketides	Zeatin biosynthesis	13	42	0.182384	0.498764	ko00908	Os10g0483500(OsCKX3);Os02g0206400(-);Os04g0523500(OsCKX8);Os04g0556400(-);Os01g0175850(-);Os10g0178500(OsUGT98B3);Os07g0660500(-);Os05g0311801(-);Os05g0177500(-);Os03g0810100(OsIPT4);Os02g0206100(-);Os05g0374200(OsCKX9);Os04g0556600(CZOGT2)	K00279+K13496+K00279+K13495+K13496+K13496+K13495+K10760+K13496+K10760+K13496+K00279+K13495
Metabolism	Carbohydrate metabolism	Glyoxylate and dicarboxylate metabolism	26	92	0.189771	0.508587	ko00630	Os04g0486950(-);Os06g0486900(FDH2);Os03g0305100(-);Os06g0486800(OsFDH);Os07g0529000(OsEnS-107);Os01g0110400(-);Os01g0337900(-);Os08g0434300(MDH);Os02g0735200(OsGS1);Os06g0727200(CATB);Os12g0291400(RbcS5);Os11g0455800(OsSHM2);Os02g0194100(-);Os07g0616500(GLO5);Os02g0525900(-);Os03g0136900(-);Os12g0632700(-);Os02g0115700(CATA1);Os02g0562700(OsGLYR1);Os04g0107500(-);Os02g0232400(-);Os12g0409000(OsSH…	K01638+K00122+K01913+K00122+K01637+K00626+K00382+K00026+K01915+K03781+K01602+K00600+K01647+K11517+K01895+K01681+K00026+K03781+K18121+K15919+K01647+K00600+K01647+K01895+K11517+K00026
Metabolism	Glycan biosynthesis and metabolism	N-Glycan biosynthesis	13	43	0.207649	0.545587	ko00510	Os03g0216600(-);Os04g0675500(Stt3a);Os03g0824400(-);Os03g0821800(-);Os01g0911200(-);Os05g0519900(-);Os06g0245700(-);Os07g0209000(OsDGL1);Os04g0693000(-);Os05g0209100(-);Os04g0606400(-);Os05g0301500(-);Os04g0397000(dad-1)	K05546+K07151+K00721+K00729+K12667+K07151+K01231+K12670+K12666+K23741+K01230+K12666+K12668
Metabolism	Biosynthesis of other secondary metabolites	Indole alkaloid biosynthesis	2	4	0.24269	0.617313	ko00901	Os08g0140300(TDC1);Os08g0140500(OsTDC3)	K01593+K01593
Metabolism	Glycan biosynthesis and metabolism	Other glycan degradation	6	18	0.244161	0.617313	ko00511	Os05g0539400(OsBgal9);Os10g0339600(-);Os11g0242100(-);Os10g0140200(-);Os07g0575500(-);Os05g0346500(-)	K12309+K15923+K17108+K01191+K12373+K01227
Metabolism	Metabolism of cofactors and vitamins	Ubiquinone and other terpenoid-quinone biosynthesis	16	58	0.297259	0.729019	ko00130	Os10g0578950(OsACS2);Os02g0177600(4CL3);Os06g0345200(OsNAAT4);Os08g0388900(-);Os05g0320700(C4H2);Os08g0130400(-);Os02g0302200(-);Os02g0467600(C4H1);Os01g0784800(-);Os08g0448000(4CL5);Os01g0901600(OsACS6);Os03g0152400(OsACS1);Os07g0280200(OsACS7);Os02g0701600(OsVTE4);Os04g0217900(-);Os02g0697400(4CL2)	K01904+K01904+K00815+K06125+K00487+K14760+K00815+K00487+K03809+K01904+K01904+K01904+K01904+K05928+K12501+K01904
Metabolism	Metabolism of cofactors and vitamins	Thiamine metabolism	7	23	0.299224	0.729019	ko00730	Os05g0367400(-);Os04g0671100(-);Os01g0931400(ROX1);Os03g0306900(-);Os07g0529600(OsDR8);Os12g0236400(ADK-A);Os07g0190000(OsDXS)	K00949+K00939+K00949+K20896+K03146+K00939+K01662
Metabolism	Carbohydrate metabolism	Ascorbate and aldarate metabolism	17	63	0.324419	0.763172	ko00053	Os07g0191000(-);Os03g0757900(-);Os08g0114300(-);Os03g0285700(OsAPX1);Os02g0730000(OsALDH2a);Os12g0482700(-);Os08g0549100(OsAPx4);Os08g0557600(OsMDAR4);Os06g0270900(OsALDH2B1);Os11g0186200(OsALDH3H2);Os04g0434800(OsAPx7);Os12g0443500(-);Os11g0591100(OsGME2);Os11g0217300(-);Os12g0443600(-);Os07g0694700(APX2);Os02g0646500(OS-ALDH)	K18649+K00012+K00103+K00434+K00128+K17744+K00434+K08232+K00128+K00128+K00434+K00012+K10046+K16190+K00012+K00434+K00128
Metabolism	Carbohydrate metabolism	Galactose metabolism	18	67	0.324633	0.763172	ko00052	Os07g0687900(wsi76);Os04g0664900(OsCIN5);Os02g0534400(OSCIN1);Os05g0539400(OsBgal9);Os01g0722700(OsHXK9);Os05g0524400(OsPFK05);Os10g0405600(OsPFK10);Os09g0255000(OSINV1);Os04g0458600(-);Os06g0676700(-);Os03g0316200(OsGolS1);Os01g0191700(OsPFK01);Os09g0323000(OsUGE4);Os05g0595100(OsUGE1);Os07g0209100(-);Os04g0535600(OSINV2);Os10g0155500(-);Os07g0679300(alpha-Gal)	K18819+K01193+K01193+K12309+K00844+K00850+K00850+K01193+K01785+K01187+K18819+K00850+K01784+K01784+K06617+K01193+K01785+K07407
Metabolism	Lipid metabolism	Linoleic acid metabolism	6	20	0.33722	0.76589	ko00591	Os01g0762000(OspPLAIValpha);Os02g0194700(OsLOX1);Os08g0509100(OsLOX8);Os03g0700400(LOX-3);Os03g0700700(OsLOX1);Os08g0508800(Lox2:Os:1)	K14674+K00454+K00454+K15718+K15718+K00454
Metabolism	Metabolism of terpenoids and polyketides	Sesquiterpenoid and triterpenoid biosynthesis	6	20	0.33722	0.76589	ko00909	Os03g0347900(-);Os07g0218200(TPS3);Os07g0200700(-);Os11g0285000(OsOSC8);MSTRG.18361(TPS7);MSTRG.18365(TPS7)	K15803+K15803+K00801+K19011+K15803+K15803
Metabolism	Biosynthesis of other secondary metabolites	Stilbenoid, diarylheptanoid and gingerol biosynthesis	8	28	0.346029	0.772798	ko00945	Os04g0500700(OsHCT1);Os08g0543400(-);Os05g0320700(C4H2);Os05g0494000(OsC3'H1);Os02g0467600(C4H1);Os02g0611800(OsHCT2);Os04g0664600(-);Os10g0196000(-)	K13065+K13065+K00487+K09754+K00487+K13065+K13065+K09754
Metabolism	Lipid metabolism	Synthesis and degradation of ketone bodies	3	9	0.367536	0.793765	ko00072	Os01g0110400(-);Os01g0269000(-);Os08g0544900(-)	K00626+K01640+K01641
Metabolism	Metabolism of other amino acids	Taurine and hypotaurine metabolism	3	9	0.367536	0.793765	ko00430	Os04g0457500(-);Os03g0720300(GDCi);Os03g0236200(OsGAD3)	K00681+K01580+K01580
Metabolism	Carbohydrate metabolism	Fructose and mannose metabolism	19	73	0.374865	0.793765	ko00051	Os08g0120600(-);Os08g0345700(OsPFPA3);Os03g0828300(-);Os03g0294200(OsF2KP2);Os01g0722700(OsHXK9);Os05g0524400(OsPFK05);Os10g0405600(OsPFK10);Os03g0115100(-);Os01g0118000(-);Os03g0268400(OsMPG3);Os06g0311600(-);Os01g0746700(-);Os09g0298100(OsPFPA4);Os01g0191700(OsPFK01);Os07g0669100(OsXYLA1);Os08g0113100(OsFKII);Os06g0652300(-);Os12g0169600(-);Os06g0652400(-)	K01623+K00895+K19355+K01103+K00844+K00850+K00850+K05305+K01623+K00966+K19355+K19355+K00895+K00850+K01805+K00847+K02377+K01623+K02377
Genetic Information Processing	Folding, sorting and degradation	Protein export	16	61	0.379112	0.793765	ko03060	Os05g0509500(-);Os02g0565200(-);Os02g0178400(-);Os03g0147900(-);Os09g0556000(-);Os04g0446300(-);Os03g0116000(-);Os02g0267000(-);Os08g0254500(-);Os03g0213100(-);Os06g0653900(-);Os01g0889000(-);Os02g0435000(OsNSCC2);Os01g0772800(-);Os01g0501700(OsTATC);Os02g0115900(OsBiP1)	K03106+K12947+K07342+K09648+K12948+K12947+K03217+K03100+K10956+K10956+K07342+K03108+K12275+K03106+K03118+K09490
Genetic Information Processing	Translation	Ribosome biogenesis in eukaryotes	25	99	0.410364	0.818264	ko03008	Os07g0636000(-);Os03g0350300(BIP102);Os02g0821800(OsMed18_1);Os01g0375000(Os_F0781);Os04g0576300(OsSTA131);Os11g0579800(-);Os01g0649000(-);Os05g0176000(OsMed36_2);Os03g0350100(BIP101);Os03g0858100(-);Os02g0103900(-);Os02g0728700(-);Os02g0618250(-);Os11g0545000(-);Os07g0603200(-);Os03g0801800(-);Os03g0241200(-);Os03g0300300(OsWD40-68);Os03g0151700(OsWD40-63);Os12g0609800(OsWD40-199);Os05g0574500(O…	K11131+K14565+K14563+K14538+K11131+K11128+K14546+K14563+K14565+K14290+K14557+K14545+K11130+K14565+K14553+K14573+K12845+K14546+K14556+K14552+K07936+K11883+K14572+K11108+K14555
Metabolism	Biosynthesis of other secondary metabolites	Anthocyanin biosynthesis	1	2	0.420389	0.818264	ko00942	Os07g0148200(-)	K12930
Metabolism	Metabolism of terpenoids and polyketides	Brassinosteroid biosynthesis	7	26	0.430424	0.818264	ko00905	Os04g0469800(D11);Os01g0388101(-);Os02g0204700(OsCYP734A2);Os06g0600400(OsCYP734A4);Os01g0197100(D2);Os09g0441400(-);Os03g0227700(OsDWF4)	K12639+K15639+K15639+K15639+K09589+K20623+K09587
Metabolism	Metabolism of other amino acids	Selenocompound metabolism	6	22	0.433249	0.818264	ko00450	Os10g0517500(RRJ1);Os03g0209600(-);Os05g0105000(-);Os12g0624000(-);Os12g0623900(-);Os12g0287300(OsISC2)	K01761+K01874+K08247+K00549+K00549+K11717
Metabolism	Glycan biosynthesis and metabolism	Glycosphingolipid biosynthesis - ganglio series	2	6	0.438998	0.818264	ko00604	Os05g0539400(OsBgal9);Os07g0575500(-)	K12309+K12373
Metabolism	Metabolism of terpenoids and polyketides	Monoterpenoid biosynthesis	3	10	0.440155	0.818264	ko00902	Os07g0685800(-);Os02g0121700(OsTPS3);Os04g0531900(-)	K15095+K15086+K15095
Metabolism	Amino acid metabolism	Glycine, serine and threonine metabolism	21	84	0.445026	0.818264	ko00260	Os08g0342400(-);Os01g0817700(BPM);Os08g0447000(-);Os01g0337900(-);Os06g0338200(OsDAO1);Os04g0650800(-);Os06g0632200(TS);Os01g0693800(-);Os08g0424500(SK2(T)(SCL);Os07g0572100(DAO);Os11g0455800(OsSHM2);Os04g0516600(-);Os07g0182100(OsTSA);Os11g0128800(-);Os03g0157900(-);Os02g0831800(-);Os12g0502400(-);Os08g0135900(TS);Os04g0107500(-);Os12g0409000(OsSHM3);Os06g0698785(OsCMO)	K12524+K15633+K00058+K00382+K00276+K00058+K06001+K01733+K00130+K00276+K00600+K01620+K01695+K00003+K00831+K00872+K01079+K01696+K15919+K00600+K00499
Environmental Information Processing	Membrane transport	ABC transporters	13	51	0.445771	0.818264	ko02010	Os04g0209300(OsABCC10);Os08g0564300(OsABCB22);Os04g0209200(OsABCC9);Os01g0976100(OsABCB8);Os01g0173900(OsABCC3);Os12g0562700(OsABCC17);Os01g0911300(OsABCB24);Os02g0190300(OsABCB9);Os06g0128300(ABCB23);Os04g0620000(MRP1);Os03g0142800(OsABCC13);Os04g0693300(-);MSTRG.2635(ABCB11)	K05665+K05658+K05665+K05658+K05665+K05666+K05656+K05658+K05663+K05665+K05665+K05681+K05658
Organismal Systems	Environmental adaptation	Circadian rhythm - plant	13	51	0.445771	0.818264	ko04712	Os09g0532400(OsPRR95);Os11g0547000(FKF1);Os03g0719800(PHYA);Os05g0571000(OsWD40-123);Os11g0157600(OsPRR59);Os06g0601500(OsbZIP48);Os01g0566100(OsELF3.2);Os02g0771100(PPS);Os03g0752100(PHYC);Os02g0150800(OsZTL1);Os01g0182600(GI);Os04g0103900(CHS);Os01g0286100(PIL15)	K12130+K12116+K12120+K16240+K12130+K16241+K12125+K10143+K12120+K12115+K12124+K00660+K12126
Environmental Information Processing	Signal transduction	Phosphatidylinositol signaling system	21	85	0.469483	0.841127	ko04070	Os07g0191000(-);Os03g0310800(-);Os12g0562400(OsPLC3);Os10g0327300(-);Os07g0687200(OsCam1-2);Os07g0619200(-);Os12g0183300(RHL);Os04g0634700(OsBIDK1);Os05g0491100(CALa*);Os06g0259000(-);Os02g0554300(-);Os01g0783200(-);Os02g0523800(OsIPK2);Os01g0267900(OsCam1-3);Os02g0123600(-);Os03g0356582(-);Os02g0466400(OsITPK4);Os11g0600500(-);Os01g0279300(OsCaM3);Os08g0104700(-);MSTRG.26380(--)	K18649+K02183+K05857+K00981+K02183+K02183+K15422+K00901+K02183+K00921+K21797+K00901+K00915+K02183+K00999+K00889+K00913+K02183+K02183+K00921+K02183
Metabolism	Amino acid metabolism	Tryptophan metabolism	20	81	0.473458	0.841127	ko00380	Os04g0183500(-);Os09g0528700(OsCYP76M7);Os04g0184100(-);Os04g0117900(OsAMI2);Os01g0110400(-);Os01g0337900(-);Os06g0328900(-);Os09g0344500(ZRP4);Os01g0274100(OsYUCCA10);Os06g0727200(CATB);Os02g0730000(OsALDH2a);Os08g0140300(TDC1);Os02g0592000(-);Os06g0270900(OsALDH2B1);Os11g0186200(OsALDH3H2);Os02g0115700(CATA1);Os08g0140500(OsTDC3);Os07g0437000(YUCCA6);Os02g0646500(OS-ALDH);Os04g0394200(-)	K01426+K07408+K01426+K01426+K00626+K00382+K07408+K22588+K11816+K03781+K00128+K01593+K23947+K00128+K00128+K03781+K01593+K11816+K00128+K00658
Metabolism	Lipid metabolism	Fatty acid biosynthesis	13	52	0.477057	0.841127	ko00061	Os06g0596300(-);Os07g0616200(-);Os10g0363300(ACC1);Os08g0327400(-);Os05g0317200(LACS8);Os01g0681200(-);Os12g0168700(LACS1);Os11g0147000(-);Os01g0655800(-);Os04g0379900(-);Os03g0423300(-);Os04g0445700(-);Os10g0456100(-)	K10781+K09458+K11262+K00208+K01897+K01897+K01897+K01897+K01897+K03921+K03921+K09458+K00059
Metabolism	Biosynthesis of other secondary metabolites	Phenylpropanoid biosynthesis	64	266	0.494338	0.860276	ko00940	Os07g0677100(POX8.1);Os02g0627100(OsPAL1);Os06g0306300(prx78);Os06g0274800(prx77);Os07g0676900(prx109);Os01g0963000(prx22);Os10g0578950(OsACS2);Os02g0187800(GH2);Os12g0111800(-);Os01g0327100(prx15);Os04g0500700(OsHCT1);Os03g0762300(-);Os08g0441500(OsCCR);Os06g0683300(Os6bglu25);Os02g0626400(OsPAL);Os02g0177600(4CL3);Os02g0626100(OsPAL);Os02g0240300(prx29);Os07g0638400(Os1-Cys);Os08g0543400(-);Os0…	K00430+K10775+K00430+K00430+K00430+K00430+K01904+K00083+K00430+K00430+K13065+K00430+K09753+K01188+K10775+K01904+K13064+K00430+K11188+K13065+K00430+K23260+K00083+K10775+K00430+K00430+K00430+K01188+K00430+K01188+K00430+K00487+K01188+K00430+K09754+K10775+K00430+K00487+K10775+K01188+K22395+K13066+K01904+K00430+K01904+K00083+K01904+K05350+K00430+K00430+K13065+K05349+K00083+K01904+K09755+K05350+K01188+…
Environmental Information Processing	Signal transduction	MAPK signaling pathway - plant	51	212	0.500941	0.860591	ko04016	Os10g0542900(Cht8);Os05g0539800(OsRTH2);Os10g0564500(SAPK3);Os05g0592800(OsABIL2);Os06g0665800(HMA9);Os03g0310800(-);Os07g0129300(OsPR1);Os03g0701700(OS-ERS1);Os10g0563700(-);Os01g0826400(OsWRKY24);Os04g0432000(SAPK7);Os08g0453700(RbohF);Os05g0595400(OsNDPK3);Os04g0578000(ACS2);Os07g0687200(OsCam1-2);Os07g0619200(-);Os02g0135200(OsMPK13);Os03g0324200(EIL1);Os01g0382000(OsPR1b);Os05g0491100(CALa*)…	K20547+K20726+K14498+K14497+K17686+K02183+K13449+K14509+K00940+K13424+K14498+K13447+K00940+K20772+K02183+K02183+K20538+K14514+K13449+K02183+K14516+K14497+K03781+K13424+K20538+K20547+K20536+K20547+K13422+K13449+K20535+K14498+K14510+K13449+K14498+K14498+K13414+K00940+K20717+K02183+K13449+K03781+K13449+K02183+K20535+K02183+K00940+K20716+K13447+K14516+K02183
Metabolism	Amino acid metabolism	Valine, leucine and isoleucine biosynthesis	6	24	0.526574	0.891363	ko00290	Os12g0138900(OsIPMS2);Os02g0125100(-);Os08g0559600(Dad);Os03g0655700(-);Os05g0573700(-);Os03g0231600(-)	K01649+K01703+K01687+K00052+K00053+K00826
Metabolism	Amino acid metabolism	Lysine degradation	12	50	0.546006	0.891363	ko00310	Os01g0110400(-);Os01g0337900(-);Os08g0565700(OsSET32);Os02g0730000(OsALDH2a);Os11g0602200(OsSET41);Os02g0783700(-);Os04g0423600(OsSET18);Os06g0270900(OsALDH2B1);Os11g0186200(OsALDH3H2);Os07g0435900(OsSET25);Os02g0646500(OS-ALDH);Os04g0394200(-)	K00626+K00382+K11420+K00128+K11420+K14157+K11426+K00128+K00128+K11420+K00128+K00658
Genetic Information Processing	Folding, sorting and degradation	Protein processing in endoplasmic reticulum	56	236	0.546158	0.891363	ko04141	Os03g0821100(OsHSP70);Os09g0482400(OsHsp80.2);Os05g0156500(OsDjB6);Os01g0377700(-);Os03g0216600(-);Os05g0156300(PDIL2);Os12g0636000(OsRDCP5);Os09g0482600(OsHsp90);Os06g0716700(GRP94);Os03g0822700(-);Os04g0675500(Stt3a);Os06g0634600(-);Os04g0549600(OsDjA6);Os08g0487800(-);Os03g0276500(OsHsp71.1);Os02g0178400(-);Os03g0266300(Oshsp17.9A);Os09g0293400(OsUBC18);Os05g0460200(OsUBC12);Os11g0199200(ESP2)…	K03283+K04079+K09517+K14015+K05546+K09584+K10666+K04079+K09487+K09562+K07151+K14012+K09503+K09487+K03283+K07342+K13993+K06689+K10575+K09580+K08054+K09518+K10085+K03283+K13525+K12667+K07151+K10956+K09503+K13989+K10956+K14007+K03283+K13993+K04554+K14016+K12670+K10088+K03347+K07342+K09584+K12666+K23741+K01230+K09486+K12666+K14003+K12275+K06689+K08057+K10666+K12668+K09490+K03283+K09487+K10661
Genetic Information Processing	Folding, sorting and degradation	Sulfur relay system	4	16	0.553454	0.891363	ko04122	Os04g0460500(-);Os12g0608600(STR22);Os12g0588900(-);Os02g0258900(-)	K03637+K01011+K14169+K03639
Metabolism	Biosynthesis of other secondary metabolites	Aflatoxin biosynthesis	1	3	0.558765	0.891363	ko00254	Os10g0363300(ACC1)	K11262
Metabolism	Biosynthesis of other secondary metabolites	Benzoxazinoid biosynthesis	1	3	0.558765	0.891363	ko00402	Os03g0797500(-)	K13222
Metabolism	Metabolism of cofactors and vitamins	Folate biosynthesis	8	34	0.584625	0.921644	ko00790	Os04g0460500(-);Os01g0238500(-);Os03g0111100(-);Os02g0592200(-);Os05g0244700(OsAT-IV);Os08g0556200(-);Os02g0607700(-);Os02g0258900(-)	K03637+K18482+K01930+K01113+K18482+K01633+K00079+K03639
Organismal Systems	Environmental adaptation	Plant-pathogen interaction	68	292	0.617174	0.941522	ko04626	Os09g0482400(OsHsp80.2);Os03g0331700(OsCML27);Os05g0467000(OsCDPK16);Os01g0622600(OsCDPK1);Os07g0186500(-);Os09g0482600(OsHsp90);Os06g0698802(-);Os06g0716700(GRP94);Os03g0310800(-);Os07g0129300(OsPR1);Os08g0117400(OsCML7);Os01g0826400(OsWRKY24);Os08g0487800(-);Os08g0453700(RbohF);Os05g0312600(OsCML21);Os11g0229400(-);Os05g0574600(OsCHS);Os07g0409900(CDPK18);Os07g0687200(OsCam1-2);Os07g0619200(-);…	K04079+K13448+K13412+K13412+K13457+K04079+K13457+K09487+K02183+K13449+K13448+K13424+K09487+K13447+K13448+K13457+K15397+K13412+K02183+K02183+K15397+K13473+K00864+K13449+K02183+K13448+K13424+K04368+K20536+K13412+K13448+K05391+K13457+K05391+K13459+K13457+K13459+K13449+K13448+K13412+K05391+K13437+K13457+K13449+K13457+K13457+K13414+K05391+K18835+K15397+K13412+K02183+K13457+K13448+K13456+K13449+K13412+…
Metabolism	Metabolism of cofactors and vitamins	Pantothenate and CoA biosynthesis	8	35	0.620671	0.941522	ko00770	Os02g0736400(OsDHODH1);Os08g0559600(Dad);Os06g0199500(OsHAL3);Os01g0807900(-);Os06g0207000(-);Os05g0573700(-);Os03g0231600(-);Os09g0533100(-)	K00207+K01687+K01598+K01464+K09680+K00053+K00826+K09680
Metabolism	Biosynthesis of other secondary metabolites	Tropane, piperidine and pyridine alkaloid biosynthesis	8	35	0.620671	0.941522	ko00960	Os01g0760600(-);Os06g0345200(OsNAAT4);Os06g0338200(OsDAO1);Os06g0548000(-);Os02g0797500(AST);Os01g0871300(-);Os07g0572100(DAO);Os02g0302200(-)	K14454+K00815+K00276+K14455+K00811+K15849+K00276+K00815
Metabolism	Metabolism of cofactors and vitamins	Biotin metabolism	5	22	0.631417	0.941522	ko00780	Os07g0616200(-);Os08g0327400(-);Os10g0560900(-);Os04g0445700(-);Os10g0456100(-)	K09458+K00208+K00652+K09458+K00059
Metabolism	Biosynthesis of other secondary metabolites	Monobactam biosynthesis	3	13	0.632365	0.941522	ko00261	Os08g0342400(-);Os02g0436400(-);Os04g0254000(-)	K12524+K00215+K01714
Metabolism	Energy metabolism	Sulfur metabolism	9	40	0.64086	0.943683	ko00920	Os12g0608600(STR22);Os12g0625000(rcs1);Os08g0530400(OSMCP);Os12g0183300(RHL);Os06g0149900(-);Os03g0747800(RCS3);Os01g0978100(-);Os07g0558300(-);Os12g0442800(-)	K01011+K01738+K00387+K15422+K01738+K01738+K01738+K01082+K00387
Genetic Information Processing	Folding, sorting and degradation	RNA degradation	29	128	0.660854	0.947191	ko03018	Os10g0437200(-);Os02g0774300(OsISC23);Os07g0168000(-);Os05g0524400(OsPFK05);Os10g0405600(OsPFK10);Os09g0279500(-);Os08g0440200(OsCAF1-11);Os09g0123100(-);Os02g0550700(OsCER7);Os09g0115400(OsPABPC1);Os02g0294700(-);Os12g0102400(OsRINGC2-2);Os02g0517300(-);Os06g0114000(OsCPn60beta1);Os09g0491772(OsHsp58.7);Os04g0504800(OsPABPC3);Os02g0796300(OsCAF1H);Os01g0191700(OsPFK01);Os10g0167300(OsEE1);Os03g0…	K12591+K04043+K00962+K00850+K00850+K13126+K01148+K12607+K03678+K13126+K12617+K10643+K12617+K04077+K04043+K13126+K12581+K00850+K01689+K12605+K04043+K12614+K12617+K12598+K01689+K12587+K12606+K04077+K01689
Metabolism	Biosynthesis of other secondary metabolites	Biosynthesis of various secondary metabolites - part 2	1	4	0.664123	0.947191	ko00998	Os12g0263200(-)	K21568
Metabolism	Energy metabolism	Oxidative phosphorylation	41	180	0.664447	0.947191	ko00190	Os02g0816800(OsNDUFA9);Os03g0295500(-);Os07g0645400(-);Os01g0600000(-);Os01g0659200(v-ATP-E);Os02g0520800(-);Os06g0662000(PLS1);Os03g0352800(-);Os04g0498200(OsCOX6b2);Os08g0120000(SDHB);Os03g0772800(-);Os10g0320400(-);Os06g0568200(OsVHA-B);Os08g0496000(-);Os04g0656100(AHA7);Os11g0169900(-);Os03g0806900(-);Os03g0713400(-);Os12g0168900(-);Os07g0134800(SDH1);Os01g0527700(-);Os01g0834200(-);Os08g0246…	K03953+K03952+K03942+K02140+K02150+K00411+K02145+K03955+K02267+K00235+K02266+K02136+K02147+K02259+K01535+K02155+K00417+K03934+K02155+K00234+K02257+K02154+K00417+K03661+K02137+K00416+K00413+K02133+K05573+K01507+K01535+K02148+K00413+K05575+K05576+K05578+K03881+K03936+K05577+K02128+K05577
Metabolism	Metabolism of cofactors and vitamins	Vitamin B6 metabolism	3	14	0.685241	0.952866	ko00750	Os01g0693800(-);Os03g0157900(-);Os12g0600400(-)	K01733+K00831+K00868
Metabolism	Carbohydrate metabolism	Inositol phosphate metabolism	17	77	0.686985	0.952866	ko00562	Os07g0191000(-);Os03g0826600(NPC1);Os12g0562400(OsPLC3);Os12g0183300(RHL);Os10g0428200(-);Os03g0818100(-);Os06g0259000(-);Os02g0554300(-);Os07g0188800(OsALDH6B2);Os07g0421200(-);Os02g0523800(OsIPK2);Os03g0852800(OsNPC3);Os02g0123600(-);Os03g0356582(-);Os02g0466400(OsITPK4);Os09g0518700(OsITPK6);Os08g0104700(-)	K18649+K01114+K05857+K15422+K22913+K03103+K00921+K21797+K00140+K22913+K00915+K01114+K00999+K00889+K00913+K01765+K00921
Metabolism	Glycan biosynthesis and metabolism	Glycosylphosphatidylinositol(GPI)-anchor biosynthesis	6	28	0.689761	0.952866	ko00563	Os01g0682200(-);Os07g0270950(-);Os01g0939000(-);Os02g0688900(-);Os02g0219400(-);Os01g0907300(-)	K05289+K03857+K11001+K05293+K05290+K05291
Metabolism	Lipid metabolism	Arachidonic acid metabolism	4	19	0.698927	0.953523	ko00590	Os03g0829100(-);Os01g0762000(OspPLAIValpha);Os03g0358100(OsGpx2);Os02g0607700(-)	K08726+K14674+K00432+K00079
Metabolism	Lipid metabolism	Ether lipid metabolism	7	33	0.704469	0.953523	ko00565	Os10g0524400(OsPLDbeta1);Os03g0826600(NPC1);Os01g0762000(OspPLAIValpha);Os01g0172400(OsPLDalpha1);Os06g0604300(OsPLDalpha5);Os03g0852800(OsNPC3);Os02g0676000(-)	K01115+K01114+K14674+K01115+K01115+K01114+K13519
Metabolism	Glycan biosynthesis and metabolism	Glycosphingolipid biosynthesis - globo and isoglobo series	2	10	0.729691	0.968105	ko00603	Os07g0575500(-);Os07g0679300(alpha-Gal)	K12373+K07407
Metabolism	Carbohydrate metabolism	C5-Branched dibasic acid metabolism	2	10	0.729691	0.968105	ko00660	Os02g0125100(-);Os03g0655700(-)	K01703+K00052
Metabolism	Carbohydrate metabolism	Starch and sucrose metabolism	43	197	0.776979	0.987279	ko00500	Os06g0726400(SBE1);Os04g0664900(OsCIN5);Os02g0534400(OSCIN1);Os06g0367100(-);Os09g0469400(OsISA3);Os06g0683300(Os6bglu25);Os05g0580000(OsAGPL3);Os01g0722700(OsHXK9);Os05g0533600(SSIVB);Os08g0520900(OsPHS8);Os03g0340500(SUS4);Os03g0212800(Os3bglu6);Os01g0851700(Pho2);Os01g0730300(OsTPS3);Os04g0474900(OsTAGG1);Os05g0366600(Os5bglu22);Os09g0255000(OSINV1);Os09g0465600(-);Os06g0676700(-);Os10g0553300…	K00700+K01193+K01193+K00700+K01214+K01188+K00975+K00844+K00703+K01214+K00695+K01188+K00688+K16055+K01188+K01188+K01193+K01810+K01187+K01087+K01188+K19892+K01177+K01810+K00696+K01194+K00975+K00695+K01087+K05350+K16055+K16055+K05349+K16055+K05350+K01188+K16055+K01193+K00975+K05350+K19893+K00847+K16055
Metabolism	Biosynthesis of other secondary metabolites	Flavone and flavonol biosynthesis	2	11	0.778673	0.987279	ko00944	Os01g0176000(OsUGT98B1);Os01g0176200(-)	K22771+K22771
Genetic Information Processing	Replication and repair	Non-homologous end-joining	2	11	0.778673	0.987279	ko03450	Os07g0184900(OsKu70);Os05g0540100(OsFEN1)	K10884+K04799
Metabolism	Lipid metabolism	Steroid biosynthesis	9	45	0.780559	0.987279	ko00100	Os02g0323600(OsCYP51H4);Os01g0103600(-);Os01g0762000(OspPLAIValpha);Os01g0211600(-);Os02g0113200(OsCYP51H5);Os03g0405000(-);Os02g0465400(-);Os07g0200700(-);Os02g0139700(OsOSC2)	K05917+K01824+K14674+K09832+K05917+K23558+K00213+K00801+K01853
Cellular Processes	Transport and catabolism	Endocytosis	37	172	0.794238	0.987279	ko04144	Os03g0821100(OsHSP70);Os10g0524400(OsPLDbeta1);Os01g0654300(-);Os10g0441800(OsRab5A2);Os02g0437800(-);Os04g0669300(-);Os10g0377400(OsRab11E1);Os01g0862300(-);Os09g0327100(OsRab11C2);Os03g0276500(OsHsp71.1);Os06g0551400(OsRab11);Os01g0141100(OsSKD1);Os12g0121400(-);Os05g0516600(OsRab7B3);Os02g0806600(-);Os01g0840100(OsMed37_1);Os02g0738900(BC3);Os07g0239400(OsRab8A3);Os07g0563800(-);Os03g0666500(O…	K03283+K01115+K05758+K07889+K12479+K12483+K07904+K17917+K07904+K03283+K07904+K12196+K12194+K07897+K12471+K03283+K01528+K07901+K12486+K07889+K18468+K07904+K12493+K12199+K11827+K03283+K01115+K01115+K07937+K01528+K19476+K00889+K18442+K11826+K07904+K12200+K03283
Metabolism	Lipid metabolism	Glycerophospholipid metabolism	27	128	0.800626	0.987279	ko00564	Os10g0524400(OsPLDbeta1);Os09g0308900(-);Os03g0826600(NPC1);Os05g0280500(GPAT);Os02g0514500(-);Os10g0327300(-);Os01g0762000(OspPLAIValpha);Os02g0612100(-);Os04g0634700(OsBIDK1);Os01g0783200(-);Os05g0548900(OsPEAMT2);Os08g0359200(-);Os01g0763600(-);Os11g0679700(OsGPAT3);Os03g0101900(-);Os01g0172400(OsPLDalpha1);Os06g0604300(OsPLDalpha5);Os03g0852800(OsNPC3);Os11g0615000(-);Os02g0123600(-);Os05g046…	K01115+K18693+K01114+K13508+K18696+K00981+K14674+K00550+K00901+K00901+K05929+K18693+K01126+K13508+K01613+K01115+K01115+K01114+K15728+K00999+K15728+K18693+K18693+K01126+K01517+K13519+K13506
Metabolism	Metabolism of terpenoids and polyketides	Terpenoid backbone biosynthesis	12	60	0.802722	0.987279	ko00900	Os05g0413400(-);Os05g0543400(OsFPPS2);Os01g0802100(OsIspE);Os02g0680400(-);Os01g0110400(-);Os11g0105800(-);Os07g0580900(OsGGPPS1);Os08g0544900(-);Os01g0832000(CDS5);Os09g0492700(HMGR);Os07g0190000(OsDXS);Os01g0248701(-)	K01823+K00787+K00919+K06013+K00626+K15892+K13789+K01641+K15892+K00021+K01662+K13789
Metabolism	Lipid metabolism	Fatty acid elongation	9	46	0.803085	0.987279	ko00062	Os05g0574600(OsCHS);Os02g0205500(-);Os08g0393600(-);Os04g0116600(-);Os06g0299100(-);Os03g0382100(-);Os03g0245700(-);Os05g0568000(KCS1);Os03g0101100(-)	K15397+K15397+K10703+K10251+K10251+K15397+K15397+K15397+K01074
Metabolism	Energy metabolism	Carbon fixation in photosynthetic organisms	19	93	0.81663	0.994804	ko00710	Os08g0120600(-);Os01g0760600(-);Os09g0505700(-);Os01g0118000(-);Os08g0434300(MDH);Os06g0548000(-);Os10g0503500(-);Os12g0291400(RbcS5);Os07g0496200(-);Os09g0315700(Osppc2b);Os06g0668200(PGK);Os04g0306400(OsRPI);Os12g0632700(-);Os02g0244700(PEPC-1);Os01g0723400(NADP-ME2);Os10g0390500(ALAAT);Os08g0126300(OsGapC3);Os12g0169600(-);Os01g0649100(OsmMDH)	K01623+K14454+K01783+K01623+K00026+K14455+K00028+K01602+K00028+K01595+K00927+K01807+K00026+K01595+K00029+K00814+K00134+K01623+K00026
Metabolism	Metabolism of cofactors and vitamins	Nicotinate and nicotinamide metabolism	4	23	0.834964	0.999992	ko00760	Os09g0567900(-);Os04g0271000(osSRT701);Os12g0179800(Sir2);Os08g0557900(-)	K01240+K11416+K11414+K01240
Metabolism	Metabolism of terpenoids and polyketides	Carotenoid biosynthesis	7	38	0.83661	0.999992	ko00906	Os10g0546600(CYP97C2);Os10g0533500(OsBCH3);Os04g0578400(OsBCH2);Os07g0204900(-);Os04g0448900(OsABA1);Os01g0566500(OsCCD8a);Os04g0448950(-)	K09837+K15746+K15746+K00514+K09838+K17913+K09838
Metabolism	Energy metabolism	Nitrogen metabolism	7	39	0.856384	0.999992	ko00910	Os08g0470200(OsalphaCA6);Os01g0547600(NRT2.4);Os02g0735200(OsGS1);Os04g0543900(OsGDH2);Os04g0412500(OsalphaCA2);Os01g0639900(BETACA1);Os02g0650900(OsGDH3)	K01674+K02575+K01915+K00261+K01674+K01673+K00261
Genetic Information Processing	Folding, sorting and degradation	SNARE interactions in vesicular transport	8	44	0.858012	0.999992	ko04130	Os03g0791500(-);Os06g0168500(-);Os06g0198800(-);Os12g0639800(-);Os03g0787000(-);Os06g0174400(OsVAMP7111);Os11g0168200(RPL3B);Os08g0440000(-)	K08517+K08486+K08517+K08515+K08486+K08515+K08498+K08495
Metabolism	Metabolism of cofactors and vitamins	One carbon pool by folate	3	19	0.866803	0.999992	ko00670	Os11g0455800(OsSHM2);Os03g0815200(-);Os12g0409000(OsSHM3)	K00600+K00297+K00600
Metabolism	Metabolism of cofactors and vitamins	Riboflavin metabolism	3	20	0.88935	0.999992	ko00740	Os02g0473000(-);Os03g0117300(-);Os12g0541000(-)	K11752+K11752+K00793
Metabolism	Energy metabolism	Photosynthesis - antenna proteins	2	17	0.938859	0.999992	ko00196	Os08g0435900(cab);Os07g0558400(CP29)	K08910+K08915
Metabolism	Glycan biosynthesis and metabolism	Other types of O-glycan biosynthesis	1	11	0.95033	0.999992	ko00514	Os01g0272600(OsRDN)	K20782
Cellular Processes	Transport and catabolism	Autophagy - other eukaryotes	6	43	0.963386	0.999992	ko04136	Os03g0805300(OsPP56);Os07g0512200(Atg8);Os01g0614900(OsATG7);Os11g0100100(OsATG8e);Os03g0248000(OsATG9a);Os04g0682000(Atg4)	K04382+K08341+K08337+K08341+K17907+K08342
Environmental Information Processing	Signal transduction	Plant hormone signal transduction	55	280	0.963904	0.999992	ko04075	Os03g0180800(TIFY11A);Os10g0564500(SAPK3);Os06g0714300(OsSAUR29);Os05g0586200(JAR1);Os05g0592800(OsABIL2);Os07g0592600(GH3-8);Os03g0667100(OsNPR3);Os07g0129300(OsPR1);Os03g0701700(OS-ERS1);Os03g0402800(OsJAZ5);Os04g0432000(SAPK7);Os01g0764800(GH3-2);Os05g0407500(GID1);Os06g0183100(ORR2);Os01g0808100(OsbZIP08);Os12g0601400(OsIAA3);Os03g0324200(EIL1);Os01g0279900(OsbZIP03);Os01g0382000(OsPR1b);Os07…	K13464+K14498+K14488+K14506+K14497+K14487+K14508+K13449+K14509+K13464+K14498+K14487+K14493+K14491+K14431+K14484+K14514+K14431+K13449+K14516+K14497+K14488+K14431+K13464+K14489+K13422+K13449+K14432+K14498+K14510+K13464+K14487+K14484+K13449+K14502+K14498+K14498+K13464+K13464+K14508+K14490+K14487+K14499+K13449+K13449+K14486+K14484+K14500+K13463+K14488+K14431+K12126+K14516+K14489+K13463
Genetic Information Processing	Folding, sorting and degradation	Proteasome	10	66	0.970566	0.999992	ko03050	Os09g0326800(OsRpn1a);Os02g0600100(-);Os08g0550100(OsRpn3);Os01g0511300(OsRpn9a);Os01g0267200(OsRpn11);Os02g0800100(-);Os06g0699900(OsRpn1b);Os02g0199900(OsRpt4a);Os06g0301300(-);Os03g0214600(OsRpn9b)	K03028+K03037+K03033+K03039+K03030+K11599+K03028+K03064+K06699+K03039
Genetic Information Processing	Translation	mRNA surveillance pathway	20	124	0.987089	0.999992	ko03015	Os08g0427900(-);Os01g0945800(HNR27C);Os01g0178400(-);Os01g0550000(AIP2);Os02g0820000(OsPP41);Os01g0959000(-);Os04g0683100(-);Os09g0279500(-);Os03g0805300(OsPP56);Os05g0373900(-);Os09g0115400(OsPABPC1);Os05g0543300(OsWD40-121);Os02g0780600(-);Os02g0217500(-);Os04g0504800(OsPABPC3);Os12g0571900(-);Os07g0274800(-);Os02g0757900(-);Os07g0495900(-);MSTRG.545(B'KAPPA)	K12881+K14411+K11584+K12812+K06269+K14325+K14397+K13126+K04382+K03265+K13126+K14962+K00565+K14399+K13126+K14408+K11584+K14396+K14326+K11584
Genetic Information Processing	Transcription	RNA polymerase	8	63	0.99136	0.999992	ko03020	Os04g0492300(-);Os06g0603400(-);Os03g0646800(-);Os09g0110400(-);Os01g0679000(-);Os03g0403100(-);MSTRG.25008(NRPA1);MSTRG.29379(RE1)	K03018+K03025+K03010+K03011+K03023+K03021+K02999+K03006
Metabolism	Energy metabolism	Photosynthesis	13	92	0.992909	0.999992	ko00195	Os04g0473150(-);Os07g0147500(PsbR);Os04g0690800(PSBS2);Os10g0461100(-);Os03g0784700(FNR);Os06g0101600(OsPC);Os05g0508900(-);Os04g0414700(-);Os03g0835900(OsFd3);Os07g0147900(-);Os10g0460900(-);Os03g0659200(OsFdC1);MSTRG.19036(psbD)	K02703+K03541+K03542+K02717+K02641+K02638+K02721+K14332+K02639+K02641+K02717+K02639+K02705
Metabolism	Lipid metabolism	Cutin, suberine and wax biosynthesis	3	35	0.995047	0.999992	ko00073	Os02g0621300(OsCER1);Os08g0557800(-);Os04g0511200(EFA27)	K15404+K13356+K17991
Genetic Information Processing	Folding, sorting and degradation	Ubiquitin mediated proteolysis	24	158	0.997528	0.999992	ko04120	Os09g0252800(-);Os05g0232500(OsUBC43);Os11g0497000(-);Os05g0425700(OsFbox258);Os01g0271500(-);Os09g0293400(OsUBC18);Os10g0536000(OsSce1);Os05g0159000(-);Os05g0460200(OsUBC12);Os10g0466300(OsWD40-178);Os09g0252700(-);Os02g0771100(PPS);Os03g0348900(OsSRFP1);Os06g0193000(OsUBC46);Os05g0354300(APC1);Os01g0369000(OsCUL1-1);Os01g0673600(OsUBC13);Os04g0580400(OsUBC3);Os12g0105975(-);Os11g0106400(-);Os03…	K10592+K10581+K10684+K03875+K10686+K06689+K10577+K10589+K10575+K10599+K10592+K10143+K10144+K04554+K03348+K03347+K10580+K10577+K03178+K03178+K04506+K06689+K10573+K10573
Metabolism	Carbohydrate metabolism	Pentose and glucuronate interconversions	9	82	0.999108	0.999992	ko00040	Os03g0757900(-);Os09g0505700(-);Os01g0847800(AKR3);Os01g0788400(OsPME6);Os07g0640200(-);Os12g0443500(-);Os07g0669100(OsXYLA1);Os11g0217300(-);Os12g0443600(-)	K00012+K01783+K00002+K01051+K00854+K00012+K01805+K16190+K00012
Genetic Information Processing	Replication and repair	DNA replication	6	71	0.999814	0.999992	ko03030	Os04g0637400(-);Os07g0418100(-);Os01g0868300(OSPOLA);Os02g0633400(RPA2B);Os09g0520100(-);Os05g0540100(OsFEN1)	K02335+K07466+K02320+K10739+K03505+K04799
Genetic Information Processing	Replication and repair	Base excision repair	3	52	0.999903	0.999992	ko03410	Os04g0637400(-);Os09g0520100(-);Os05g0540100(OsFEN1)	K02335+K03505+K04799
Genetic Information Processing	Transcription	Basal transcription factors	4	60	0.999908	0.999992	ko03022	Os01g0846900(-);Os05g0144800(OsXPD);Os08g0338200(-);Os07g0573600(OsREX1-S)	K03126+K10844+K03141+K10845
Genetic Information Processing	Transcription	Spliceosome	30	216	0.999924	0.999992	ko03040	Os03g0821100(OsHSP70);Os01g0263600(Du1L);Os03g0355200(OsWD40-72);Os08g0427900(-);Os07g0281000(OsC3H49);Os01g0550000(AIP2);Os03g0276500(OsHsp71.1);Os11g0310800(-);Os01g0857700(-);Os08g0127700(-);Os07g0621500(-);Os06g0711600(-);Os02g0122800(-);Os02g0586500(-);Os02g0245000(-);Os01g0840100(OsMed37_1);Os08g0154225(-);Os10g0466300(OsWD40-178);Os08g0159900(PRP5);Os03g0241200(-);Os02g0759800(OsSKIPa);Os1…	K03283+K12855+K12662+K12881+K12872+K12812+K03283+K12818+K12873+K12819+K12818+K12868+K12893+K11087+K12825+K03283+K12811+K10599+K12811+K12845+K06063+K03283+K11099+K12828+K12893+K12834+K12831+K12662+K03283+K12874
Genetic Information Processing	Replication and repair	Mismatch repair	3	55	0.999953	0.999992	ko03430	Os07g0418100(-);Os02g0633400(RPA2B);Os09g0520100(-)	K07466+K10739+K03505
Genetic Information Processing	Replication and repair	Nucleotide excision repair	7	86	0.999966	0.999992	ko03420	Os04g0637400(-);Os07g0418100(-);Os05g0144800(OsXPD);Os08g0338200(-);Os07g0573600(OsREX1-S);Os02g0633400(RPA2B);Os09g0520100(-)	K02335+K07466+K10844+K03141+K10845+K10739+K03505
Genetic Information Processing	Replication and repair	Homologous recombination	6	86	0.999992	0.999992	ko03440	Os04g0637400(-);Os07g0418100(-);Os04g0648700(EME1);Os09g0500600(TOP3);Os02g0633400(RPA2B);Os09g0520100(-)	K02335+K07466+K10882+K03165+K10739+K03505

## Sheet:  ZJ22c-vs-zj-esc
All enrichment pathways of mRNAs of the comparison between ZJ22c and zj-esc.
KEGG_A_class	KEGG_B_class	Pathway	ZJ22c-vs-Pir1c (1314)	All (5841)	Pvalue	Qvalue	Pathway ID	Genes	K_IDs
Metabolism	Global and overview maps	Biosynthesis of secondary metabolites	430	1549	7.25156e-09	9.71709e-07	ko01110	Os07g0677100(POX8.1);Os06g0215600(OsOPR5);Os08g0342400(-);Os07g0162100(-);Os10g0524400(OsPLDbeta1);Os06g0726400(SBE1);Os10g0369000(OsERS1);Os02g0627100(OsPAL1);Os07g0412100(GBSSII);Os06g0306300(prx78);Os08g0320400(-);Os01g0654500(-);Os07g0676900(prx109);Os02g0569400(CYP76M8);Os02g0570700(Oscyp71Z7);Os01g0963000(prx22);Os03g0126000(-);Os05g0526900(OsUGT706D2);Os07g0695800(-);Os02g0206400(-);Os10g0…	K00430+K05894+K12524+K10258+K01115+K00700+K01885+K10775+K13679+K00430+K01609+K00031+K00430+K16084+K21291+K00430+K00766+K22845+K00164+K13496+K01904+K00083+K00106+K01698+K16085+K01623+K01193+K00249+K00430+K00939+K01723+K01193+K00058+K14190+K00895+K21719+K00615+K11262+K01057+K08099+K00700+K18857+K00430+K01823+K00789+K09590+K01657+K13065+K00430+K14036+K14682+K15397+K09753+K01817+K00851+K13035+K13606+…
Metabolism	Global and overview maps	Metabolic pathways	701	2748	1.21046e-07	8.11006e-06	ko01100	Os07g0677100(POX8.1);Os06g0215600(OsOPR5);Os11g0588300(OsGSTT1);Os08g0342400(-);Os07g0613000(-);Os07g0162100(-);Os10g0524400(OsPLDbeta1);Os07g0687900(wsi76);Os06g0726400(SBE1);Os10g0369000(OsERS1);Os06g0596300(-);Os02g0627100(OsPAL1);Os07g0412100(GBSSII);Os06g0306300(prx78);Os06g0486900(FDH2);Os08g0320400(-);Os01g0654500(-);Os07g0676900(prx109);Os02g0749450(-);Os01g0963000(prx22);Os03g0126000(-);…	K00430+K05894+K00799+K12524+K00951+K10258+K01115+K18819+K00700+K01885+K10781+K10775+K13679+K00430+K00122+K01609+K00031+K00430+K09659+K00430+K00766+K00020+K01583+K16871+K00164+K01904+K00083+K03952+K00106+K01698+K01623+K00051+K01193+K00249+K08679+K00430+K00939+K03940+K01723+K01193+K22913+K00058+K14190+K01228+K07408+K05286+K08678+K00895+K01183+K11147+K00615+K11262+K01057+K08099+K08967+K00700+K18857+…
Metabolism	Global and overview maps	Carbon metabolism	105	307	9.7083e-07	4.33638e-05	ko01200	Os06g0486900(FDH2);Os01g0654500(-);Os07g0695800(-);Os08g0120600(-);Os08g0562100(-);Os08g0447000(-);Os06g0133800(OsTK);Os08g0547100(-);Os06g0486800(OsFDH);Os06g0114650(-);Os07g0529000(OsEnS-107);Os10g0552900(-);Os01g0760600(-);Os02g0105200(-);Os01g0574600(OsGLYR2);Os01g0208700(PEPC-2);Os01g0722700(OsHXK9);Os09g0505700(-);Os10g0405600(OsPFK10);Os06g0608700(OsAld-Y);Os01g0118000(-);Os08g0434300(MDH)…	K00122+K00031+K00164+K01623+K00051+K00058+K00615+K01057+K00122+K00851+K01637+K05605+K14454+K00627+K18121+K01595+K00844+K01783+K00850+K01623+K01623+K00026+K00036+K14455+K00600+K00058+K01738+K00028+K00036+K03781+K00261+K01006+K13034+K00162+K00850+K01602+K00028+K00850+K00873+K00627+K00600+K00026+K01900+K00140+K01057+K00033+K00164+K01810+K01455+K01595+K00616+K00232+K00162+K01647+K01610+K01738+K00627+…
Metabolism	Global and overview maps	Biosynthesis of amino acids	90	269	1.62056e-05	0.000542888	ko01230	Os08g0342400(-);Os08g0320400(-);Os01g0654500(-);Os03g0126000(-);Os08g0120600(-);Os08g0447000(-);Os06g0133800(OsTK);Os01g0323600(OsSAM2);Os03g0264400(OASA2);Os03g0431200(-);Os02g0266000(-);Os01g0652600(-);Os06g0133900(EPSPS);Os01g0760600(-);Os03g0291500(ASN1);Os03g0617900(-);Os07g0300900(-);Os09g0505700(-);Os10g0405600(OsPFK10);Os12g0138900(OsIPMS2);Os06g0345200(OsNAAT4);Os02g0436400(-);Os06g06087…	K12524+K01609+K00031+K00766+K01623+K00058+K00615+K00789+K01657+K14682+K01817+K00053+K00800+K14454+K01953+K00145+K00928+K01783+K00850+K01649+K00815+K00215+K01623+K01703+K00264+K01623+K01915+K14455+K01626+K00600+K00058+K06001+K01738+K01687+K13034+K00811+K00850+K01438+K00850+K00873+K01755+K00052+K15849+K00600+K01476+K00815+K01850+K00616+K01695+K01658+K10206+K01647+K01738+K00615+K01714+K00831+K00927+…
Metabolism	Carbohydrate metabolism	Pyruvate metabolism	38	95	8.52725e-05	0.0022853	ko00620	Os08g0562100(-);Os10g0363300(ACC1);Os02g0105200(-);Os01g0208700(PEPC-2);Os12g0138900(OsIPMS2);Os08g0434300(MDH);Os10g0503500(-);Os05g0405000(flo4);Os08g0536000(-);Os07g0496200(-);Os02g0730000(OsALDH2a);Os12g0145700(-);Os06g0499900(-);Os01g0829800(-);Os03g0332400(GLYII-2);Os09g0315700(Osppc2b);Os09g0509200(-);Os03g0255500(-);Os06g0105400(-);Os02g0525900(-);Os11g0216000(-);Os03g0432100(osppdka);Os1…	K00051+K11262+K00627+K01595+K01649+K00026+K00028+K01006+K00162+K00028+K00128+K00873+K00627+K00026+K01069+K01595+K00162+K01610+K00627+K01895+K00873+K01006+K00026+K00128+K00627+K01759+K00128+K00161+K00161+K01595+K00029+K01679+K00627+K01759+K00873+K00128+K00026+K00873
Metabolism	Amino acid metabolism	Phenylalanine, tyrosine and tryptophan biosynthesis	24	54	0.000266758	0.0059576	ko00400	Os08g0320400(-);Os03g0126000(-);Os03g0264400(OASA2);Os02g0266000(-);Os06g0133900(EPSPS);Os01g0760600(-);Os06g0345200(OsNAAT4);Os06g0548000(-);Os03g0389700(OsDAHPS1);Os06g0632200(TS);Os02g0797500(AST);Os01g0871300(-);Os02g0302200(-);Os01g0764400(CM);Os07g0182100(OsTSA);Os03g0718000(OASB2);Os09g0255400(IGPS);Os01g0375200(DHQDT/SDH);Os04g0406600(-);Os03g0254800(CS);Os08g0135900(TS);Os04g0463500(OASB…	K01609+K00766+K01657+K01817+K00800+K14454+K00815+K14455+K01626+K06001+K00811+K15849+K00815+K01850+K01695+K01658+K01609+K13832+K05359+K01736+K01696+K01658+K01626+K13832
Metabolism	Lipid metabolism	Fatty acid degradation	23	54	0.000746741	0.0132201	ko00071	Os07g0675000(-);Os05g0529200(-);Os11g0210500(Adh2*);Os01g0348600(-);Os02g0817700(OsI57);Os02g0274100(AIM1);Os02g0730000(OsALDH2a);Os05g0317200(LACS8);Os01g0681200(-);Os11g0210600(Adh3);Os06g0103500(ACX1);Os12g0168700(LACS1);Os10g0159800(-);Os11g0605500(ACX2);Os11g0147000(-);Os01g0655800(-);Os06g0270900(OsALDH2B1);Os11g0186200(OsALDH3H2);Os05g0163700(OsACX4);Os10g0457600(-);Os03g0189600(-);Os06g03…	K00249+K07517+K18857+K10527+K07513+K10527+K00128+K01897+K01897+K00001+K00232+K01897+K00001+K00232+K01897+K01897+K00128+K00128+K00232+K07513+K00121+K00232+K00128
Metabolism	Carbohydrate metabolism	Citrate cycle (TCA cycle)	25	61	0.000887915	0.0132201	ko00020	Os01g0654500(-);Os07g0695800(-);Os02g0105200(-);Os08g0434300(MDH);Os08g0536000(-);Os06g0499900(-);Os01g0829800(-);Os02g0621700(-);Os01g0300200(-);Os04g0390000(-);Os09g0509200(-);Os02g0194100(-);Os03g0255500(-);Os06g0105400(-);Os03g0136900(-);Os01g0276100(OsIDHa);Os12g0632700(-);Os07g0410100(-);Os02g0739600(OsPDHE1-A);Os04g0479200(-);Os04g0119400(-);Os03g0337900(-);Os09g0408600(-);Os04g0394200(-);…	K00031+K00164+K00627+K00026+K00162+K00627+K00026+K01900+K01648+K00164+K00162+K01647+K01610+K00627+K01681+K00030+K00026+K00627+K00161+K00030+K00161+K01679+K00627+K00658+K00026
Metabolism	Lipid metabolism	alpha-Linolenic acid metabolism	25	61	0.000887915	0.0132201	ko00592	Os06g0215600(OsOPR5);Os12g0448900(PIOX);Os03g0225900(AOS2);Os11g0210500(Adh2*);Os01g0348600(-);Os05g0102000(OsJMT1);Os08g0459600(OPR7);Os02g0218700(HPL2);Os01g0762000(OspPLAIValpha);Os02g0817700(OsI57);Os02g0274100(AIM1);Os09g0513100(-);Os02g0194700(OsLOX1);Os06g0103500(ACX1);Os04g0447100(SPH);Os11g0605500(ACX2);Os02g0110200(HPL3);Os08g0509100(OsLOX8);Os04g0615100(-);Os05g0163700(OsACX4);Os06g021…	K05894+K10529+K01723+K18857+K10527+K08241+K05894+K01723+K14674+K07513+K10527+K22389+K00454+K00232+K00454+K00232+K10528+K00454+K22389+K00232+K05894+K07513+K10525+K00232+K00454
Metabolism	Metabolism of terpenoids and polyketides	Diterpenoid biosynthesis	21	53	0.00364756	0.0488773	ko00904	Os02g0569400(CYP76M8);Os02g0570700(Oscyp71Z7);Os04g0178400(-);Os06g0569500(KO4);Os02g0570400(OsKS7);Os04g0180400(CYP99A2);Os04g0179200(OsMAS);Os01g0209700(OsGA2ox7);Os02g0630300(OsGA2ox9);Os01g0561600(CYP76M14);Os02g0570500(Oscyp71Z6);Os12g0491800(OsKSL10);Os02g0571900(CYP76M6);Os02g0571100(OsCPS2);Os04g0178300(OsCPS4);Os04g0179700(OsKS4);Os06g0599200(-);Os06g0568600(OsKO5);Os02g0569900(OsCYP76M7…	K16084+K21291+K16085+K21719+K14036+K16085+K13070+K04125+K04125+K16084+K16083+K14037+K21718+K04120+K14043+K14046+K16084+K04122+K16084+K14044+K04125
Metabolism	Amino acid metabolism	Tyrosine metabolism	20	51	0.00516834	0.0629598	ko00350	Os11g0210500(Adh2*);Os11g0245100(OsGSTZ4);Os01g0760600(-);Os12g0210200(OsGSTZ1);Os06g0345200(OsNAAT4);Os06g0338200(OsDAO1);Os06g0548000(-);Os02g0797500(AST);Os06g0103300(-);Os01g0871300(-);Os08g0140300(TDC1);Os02g0302200(-);Os11g0210600(Adh3);Os10g0400500(-);Os10g0159800(-);Os02g0168100(OsHPPD);Os03g0189600(-);Os08g0140500(OsTDC3);Os03g0829000(-);Os12g0210300(OsGSTZ2)	K18857+K01800+K14454+K01800+K00815+K00276+K14455+K00811+K00451+K15849+K01593+K00815+K00001+K01593+K00001+K00457+K00121+K01593+K01557+K01800
Metabolism	Carbohydrate metabolism	Pentose phosphate pathway	23	62	0.00630601	0.0704172	ko00030	Os08g0120600(-);Os08g0345700(OsPFPA3);Os06g0133800(OsTK);Os08g0547100(-);Os06g0114650(-);Os09g0505700(-);Os10g0405600(OsPFK10);Os06g0608700(OsAld-Y);Os01g0118000(-);Os04g0485300(OsG6PDH2);Os03g0318500(OsG6PDH5);Os06g0151900(OsPFK06);Os09g0415800(OsPFK08);Os09g0529100(-);Os06g0111500(Os6PGDH1);Os09g0465600(-);Os01g0926300(-);Os04g0266900(-);Os02g0600400(OsG6PDH1);Os03g0776000(Pgi1(Pgia));Os04g0306…	K01623+K00895+K00615+K01057+K00851+K01783+K00850+K01623+K01623+K00036+K00036+K00850+K00850+K01057+K00033+K01810+K00616+K00615+K00036+K01810+K01807+K00895+K00850
Metabolism	Metabolism of other amino acids	beta-Alanine metabolism	19	49	0.00730625	0.0753106	ko00410	Os02g0736400(OsDHODH1);Os10g0552900(-);Os06g0338200(OsDAO1);Os02g0730000(OsALDH2a);Os07g0188800(OsALDH6B2);Os01g0807900(-);Os06g0103500(ACX1);Os09g0368200(PAOb);Os11g0605500(ACX2);Os03g0720300(GDCi);Os12g0264500(-);Os06g0270900(OsALDH2B1);Os11g0186200(OsALDH3H2);Os05g0163700(OsACX4);Os06g0354500(ACX3);Os04g0671200(PAO4);Os03g0236200(OsGAD3);Os02g0646500(OS-ALDH);Os06g0594100(OsCRO)	K00207+K05605+K00276+K00128+K00140+K01464+K00232+K13366+K00232+K01580+K05605+K00128+K00128+K00232+K00232+K17839+K01580+K00128+K05605
Metabolism	Glycan biosynthesis and metabolism	Various types of N-glycan biosynthesis	14	34	0.0111934	0.107137	ko00513	Os08g0472600(OsFUT11);Os04g0675500(Stt3a);Os12g0170600(-);Os01g0911200(-);Os05g0519900(-);Os06g0229200(-);Os03g0565100(-);Os06g0245700(-);Os07g0209000(OsDGL1);Os04g0693000(-);Os02g0577300(-);Os07g0575500(-);Os05g0301500(-);Os04g0397000(dad-1)	K00753+K07151+K14412+K12667+K07151+K14413+K12669+K01231+K12670+K12666+K14413+K12373+K12666+K12668
Metabolism	Amino acid metabolism	Alanine, aspartate and glutamate metabolism	21	59	0.0148006	0.124634	ko00250	Os02g0112900(OsGABA-T);Os05g0536400(-);Os01g0760600(-);Os03g0291500(ASN1);Os05g0555600(OsGLT2);Os02g0735200(OsGS1);Os06g0548000(-);Os04g0543900(OsGDH2);Os02g0797500(AST);Os03g0305500(ASL1);Os03g0171900(-);Os04g0614500(-);Os03g0313600(-);Os03g0720300(GDCi);Os12g0235800(-);Os04g0614600(OSL2);Os10g0390500(ALAAT);Os03g0236200(OsGAD3);Os02g0173900(OsALDH5F1);Os02g0650900(OsGDH3);Os01g0873100(-)	K16871+K00294+K14454+K01953+K00264+K01915+K14455+K00261+K00811+K01755+K00827+K16871+K01756+K01580+K01940+K16871+K00814+K01580+K17761+K00261+K00764
Metabolism	Lipid metabolism	Sphingolipid metabolism	14	35	0.0148816	0.124634	ko00600	Os05g0539400(OsBgal9);Os03g0264000(-);Os11g0516000(OsLCB2a3);Os01g0624000(-);Os01g0928800(OsLCB2a1);Os02g0806900(-);Os02g0745700(-);Os01g0100900(SPL1);Os06g0226950(DSH1);Os10g0189600(-);Os02g0656200(OsCERK);Os03g0698900(-);Os07g0679300(alpha-Gal);MSTRG.7056(Os05g0567100)	K12309+K23727+K00654+K12349+K00654+K00654+K04713+K01634+K04713+K00654+K04715+K04711+K07407+K04718
Metabolism	Metabolism of other amino acids	Cyanoamino acid metabolism	23	67	0.0175361	0.130546	ko00460	Os02g0635200(NIT1);Os01g0771900(-);Os05g0429000(OsSHM5);Os04g0165700(OsCAS);Os03g0212800(Os3bglu6);Os04g0474900(OsTAGG1);Os11g0455800(OsSHM2);Os05g0366600(Os5bglu22);Os01g0764900(-);Os03g0749500(-);Os12g0512800(OsCYP71E5);Os03g0570100(-);Os04g0513400(Os4bglu16);Os09g0511700(Os9bglu32);Os03g0749300(OsBGLU1);Os04g0474800(Os4bglu12);Os03g0850200(-);Os01g0874900(OsSHM4);Os04g0513900(Os4bglu18);Os02g0…	K13035+K05349+K00600+K13034+K01188+K01188+K00600+K01188+K01455+K01188+K13029+K12153+K05350+K01188+K05349+K01188+K13029+K00600+K05350+K13035+K12153+K12153+K01188
Metabolism	Global and overview maps	2-Oxocarboxylic acid metabolism	23	67	0.0175361	0.130546	ko01210	Os01g0654500(-);Os03g0431200(-);Os01g0652600(-);Os01g0760600(-);Os03g0617900(-);Os07g0300900(-);Os12g0138900(OsIPMS2);Os02g0125100(-);Os06g0548000(-);Os08g0559600(Dad);Os02g0797500(AST);Os02g0690800(-);Os03g0655700(-);Os02g0194100(-);Os03g0570100(-);Os03g0136900(-);Os01g0276100(OsIDHa);Os04g0479200(-);Os05g0129100(-);Os10g0390500(ALAAT);Os04g0174100(-);Os04g0171800(-);Os03g0231600(-)	K00031+K14682+K00053+K14454+K00145+K00928+K01649+K01703+K14455+K01687+K00811+K01438+K00052+K01647+K12153+K01681+K00030+K00030+K00818+K00814+K12153+K12153+K00826
Cellular Processes	Transport and catabolism	Phagosome	30	93	0.0186633	0.131626	ko04145	Os10g0441800(OsRab5A2);Os03g0791500(-);Os03g0832200(CRT);Os01g0659200(v-ATP-E);Os08g0450700(-);Os06g0662000(PLS1);Os02g0550100(-);Os05g0507300(-);Os01g0227300(OsRab7B1);Os04g0402100(OsCNX);Os05g0180600(-);Os06g0568200(OsVHA-B);Os12g0631100(GLUP4);Os11g0169900(-);Os06g0259000(-);Os03g0666500(OsRab5B1);Os12g0168900(-);Os01g0834200(-);Os03g0213100(-);Os10g0184300(-);Os07g0574800(OsTubA1);Os12g023670…	K07889+K08517+K08057+K02150+K00921+K02145+K02155+K08057+K07897+K08054+K00914+K02147+K07889+K02155+K00921+K07889+K02155+K02154+K10956+K02154+K07374+K00921+K02149+K07375+K08057+K02148+K04392+K07374+K02151+K00921
Metabolism	Amino acid metabolism	Cysteine and methionine metabolism	39	129	0.0242663	0.151876	ko00270	Os08g0342400(-);Os08g0447000(-);Os03g0161800(Sip2A);Os02g0611200(SAMDC2);Os01g0323600(OsSAM2);Os01g0760600(-);Os09g0451000(ACO1);Os07g0300900(-);Os06g0345200(OsNAAT4);Os05g0149200(-);Os04g0578000(ACS2);Os08g0434300(MDH);Os06g0548000(-);Os04g0650800(-);Os06g0149900(-);Os01g0580500(ACO7);Os04g0669800(OsMTK);Os04g0165700(OsCAS);Os02g0797500(AST);Os01g0829800(-);Os02g0302200(-);Os03g0747800(RCS3);Os0…	K12524+K00058+K08967+K01611+K00789+K14454+K05933+K00928+K00815+K17398+K20772+K00026+K14455+K00058+K01738+K05933+K00899+K13034+K00811+K00026+K00815+K01738+K00827+K00831+K00547+K01738+K00549+K00026+K16054+K00549+K05933+K01762+K23977+K00789+K01251+K01919+K05933+K00826+K00026
Metabolism	Amino acid metabolism	Arginine biosynthesis	14	37	0.0249669	0.151876	ko00220	Os03g0431200(-);Os01g0760600(-);Os03g0617900(-);Os02g0735200(OsGS1);Os06g0548000(-);Os04g0543900(OsGDH2);Os02g0797500(AST);Os02g0690800(-);Os03g0305500(ASL1);Os04g0106300(OsARG);Os12g0235800(-);Os05g0129100(-);Os10g0390500(ALAAT);Os02g0650900(OsGDH3)	K14682+K14454+K00145+K01915+K14455+K00261+K00811+K01438+K01755+K01476+K01940+K00818+K00814+K00261
Metabolism	Biosynthesis of other secondary metabolites	Betalain biosynthesis	4	6	0.0258195	0.151876	ko00965	Os01g0878800(-);Os08g0140300(TDC1);Os10g0400500(-);Os08g0140500(OsTDC3)	K15777+K01593+K01593+K01593
Metabolism	Carbohydrate metabolism	Glycolysis / Gluconeogenesis	47	161	0.027002	0.151876	ko00010	Os08g0120600(-);Os08g0345700(OsPFPA3);Os11g0210500(Adh2*);Os02g0105200(-);Os01g0722700(OsHXK9);Os10g0405600(OsPFK10);Os06g0608700(OsAld-Y);Os01g0118000(-);Os08g0536000(-);Os06g0151900(OsPFK06);Os09g0415800(OsPFK08);Os01g0847800(AKR3);Os02g0730000(OsALDH2a);Os12g0145700(-);Os06g0499900(-);Os09g0465600(-);Os04g0458600(-);Os11g0210600(Adh3);Os09g0509200(-);Os03g0255500(-);Os06g0105400(-);Os04g045830…	K01623+K00895+K18857+K00627+K00844+K00850+K01623+K01623+K00162+K00850+K00850+K00002+K00128+K00873+K00627+K01810+K01785+K00001+K00162+K01610+K00627+K01785+K00001+K01810+K00927+K01568+K01895+K00844+K00895+K00873+K00128+K00627+K00128+K00161+K00850+K00161+K00002+K00121+K00627+K00134+K00873+K01689+K00128+K01785+K01689+K00873+K01568
Metabolism	Amino acid metabolism	Phenylalanine metabolism	19	55	0.0273777	0.151876	ko00360	Os02g0627100(OsPAL1);Os04g0184100(-);Os02g0626400(OsPAL);Os01g0760600(-);Os04g0117900(OsAMI2);Os06g0345200(OsNAAT4);Os02g0626100(OsPAL);Os06g0338200(OsDAO1);Os06g0548000(-);Os05g0427400(OsPAL04);Os02g0797500(AST);Os01g0871300(-);Os08g0140300(TDC1);Os02g0302200(-);Os04g0518400(OsPAL07);Os02g0626600(OsPAL05);Os10g0400500(-);Os02g0168100(OsHPPD);Os08g0140500(OsTDC3)	K10775+K01426+K10775+K14454+K01426+K00815+K13064+K00276+K14455+K10775+K00811+K15849+K01593+K00815+K10775+K10775+K01593+K00457+K01593
Metabolism	Lipid metabolism	Biosynthesis of unsaturated fatty acids	15	41	0.028335	0.151876	ko01040	Os07g0162100(-);Os07g0417200(OsFAD2-2);Os02g0817700(OsI57);Os06g0103500(ACX1);Os04g0116600(-);Os11g0605500(ACX2);Os07g0416900(OsFAD2-3);Os06g0299100(-);Os04g0379900(-);Os05g0163700(OsACX4);Os10g0457600(-);Os01g0150000(CER10);Os03g0423300(-);Os06g0354500(ACX3);Os07g0416700(OsFAD2-4)	K10258+K10256+K07513+K00232+K10251+K00232+K10256+K10251+K03921+K00232+K07513+K10258+K03921+K00232+K10256
Metabolism	Amino acid metabolism	Lysine biosynthesis	7	15	0.0332533	0.171382	ko00300	Os08g0342400(-);Os07g0300900(-);Os02g0436400(-);Os03g0299900(OsAGD2);Os04g0254000(-);Os03g0195100(OsALD1);Os02g0440000(-)	K12524+K00928+K00215+K10206+K01714+K10206+K01586
Metabolism	Biosynthesis of other secondary metabolites	Indole alkaloid biosynthesis	3	4	0.0378023	0.187611	ko00901	Os08g0140300(TDC1);Os10g0400500(-);Os08g0140500(OsTDC3)	K01593+K01593+K01593
Metabolism	Biosynthesis of other secondary metabolites	Caffeine metabolism	2	2	0.0505778	0.232327	ko00232	Os03g0429800(-);Os01g0865100(-)	K00106+K00365
Metabolism	Biosynthesis of other secondary metabolites	Glucosinolate biosynthesis	5	10	0.0520895	0.232327	ko00966	Os02g0125100(-);Os03g0570100(-);Os04g0174100(-);Os04g0171800(-);Os03g0231600(-)	K01703+K12153+K12153+K12153+K00826
Metabolism	Energy metabolism	Carbon fixation in photosynthetic organisms	28	93	0.0531515	0.232327	ko00710	Os08g0120600(-);Os08g0562100(-);Os06g0133800(OsTK);Os01g0760600(-);Os01g0208700(PEPC-2);Os09g0505700(-);Os06g0608700(OsAld-Y);Os01g0118000(-);Os08g0434300(MDH);Os06g0548000(-);Os10g0503500(-);Os05g0405000(flo4);Os12g0291400(RbcS5);Os07g0496200(-);Os01g0829800(-);Os09g0315700(Osppc2b);Os03g0255500(-);Os04g0266900(-);Os06g0668200(PGK);Os04g0306400(OsRPI);Os03g0432100(osppdka);Os12g0632700(-);Os02g0…	K01623+K00051+K00615+K14454+K01595+K01783+K01623+K01623+K00026+K14455+K00028+K01006+K01602+K00028+K00026+K01595+K01610+K00615+K00927+K01807+K01006+K00026+K01595+K00029+K00814+K00134+K00026+K01601
Metabolism	Carbohydrate metabolism	Amino sugar and nucleotide sugar metabolism	49	176	0.0537473	0.232327	ko00520	Os02g0791500(OsUGlcAE3);Os03g0278000(UXS);Os01g0860400(-);Os03g0757900(-);Os05g0580000(OsAGPL3);Os03g0599800(OsUAM1);Os01g0722700(OsHXK9);Os05g0247100(DIP3);Os06g0702500(OsARA1);Os11g0700900(C10923);Os03g0115100(-);Os04g0493400(Cht4(t)*(Chi4));Os10g0363100(-);Os03g0268400(OsMPG3);Os04g0494100(Cht5);Os03g0278200(-);Os06g0726200(Cht1*(Chi1));Os04g0636100(-);Os06g0726100(Cht3*);Os04g0618200(-);Os09g…	K08679+K08678+K01183+K00012+K00975+K13379+K00844+K01183+K12446+K01183+K05305+K01183+K13648+K00966+K01183+K12450+K20547+K13648+K20547+K12448+K01810+K01209+K01209+K01810+K01183+K01711+K00326+K01183+K00844+K01209+K01784+K16190+K08678+K13648+K20547+K01784+K01183+K12373+K01784+K10046+K00972+K00975+K16190+K08679+K00012+K00621+K00847+K08678+K02377
Metabolism	Amino acid metabolism	Valine, leucine and isoleucine degradation	17	52	0.0588306	0.242629	ko00280	Os05g0565500(-);Os07g0675000(-);Os10g0552900(-);Os02g0817700(OsI57);Os02g0730000(OsALDH2a);Os07g0188800(OsALDH6B2);Os01g0269000(-);Os03g0171900(-);Os08g0544900(-);Os12g0264500(-);Os06g0270900(OsALDH2B1);Os01g0314100(-);Os11g0186200(OsALDH3H2);Os10g0457600(-);Os02g0646500(OS-ALDH);Os03g0231600(-);Os06g0594100(OsCRO)	K00020+K00249+K05605+K07513+K00128+K00140+K01640+K00827+K01641+K05605+K00128+K09699+K00128+K07513+K00128+K00826+K05605
Metabolism	Carbohydrate metabolism	Propanoate metabolism	12	34	0.0613215	0.242629	ko00640	Os10g0363300(ACC1);Os10g0552900(-);Os02g0621700(-);Os07g0188800(OsALDH6B2);Os06g0103500(ACX1);Os11g0605500(ACX2);Os02g0525900(-);Os12g0264500(-);Os01g0314100(-);Os05g0163700(OsACX4);Os06g0354500(ACX3);Os06g0594100(OsCRO)	K11262+K05605+K01900+K00140+K00232+K00232+K01895+K05605+K09699+K00232+K00232+K05605
Cellular Processes	Transport and catabolism	Peroxisome	30	102	0.0615626	0.242629	ko04146	Os01g0654500(-);Os03g0429800(-);Os09g0133200(-);Os02g0225000(-);Os03g0829100(-);Os07g0152800(-);Os02g0817700(OsI57);Os05g0323900(SODA1);Os06g0727200(CATB);Os03g0708100(OMT7);Os07g0665200(Cu/Zn-SOD);Os01g0505400(-);Os01g0269000(-);Os05g0317200(LACS8);Os01g0681200(-);Os06g0103500(ACX1);Os12g0168700(LACS1);Os07g0616500(GLO5);Os11g0605500(ACX2);Os11g0147000(-);Os01g0655800(-);Os05g0163700(OsACX4);Os0…	K00031+K00106+K11147+K13354+K08726+K13344+K07513+K04564+K03781+K00477+K04565+K12261+K01640+K01897+K01897+K00232+K01897+K11517+K00232+K01897+K01897+K00232+K03781+K07513+K00232+K11517+K13356+K11517+K13354+K13348
Metabolism	Global and overview maps	Fatty acid metabolism	27	91	0.0667536	0.251502	ko01212	Os07g0162100(-);Os06g0596300(-);Os07g0675000(-);Os10g0363300(ACC1);Os01g0348600(-);Os07g0417200(OsFAD2-2);Os02g0817700(OsI57);Os02g0274100(AIM1);Os06g0196600(OsKASI);Os05g0317200(LACS8);Os01g0681200(-);Os06g0103500(ACX1);Os12g0168700(LACS1);Os04g0116600(-);Os11g0605500(ACX2);Os07g0416900(OsFAD2-3);Os06g0299100(-);Os11g0147000(-);Os01g0655800(-);Os04g0379900(-);Os05g0163700(OsACX4);Os10g0457600(-)…	K10258+K10781+K00249+K11262+K10527+K10256+K07513+K10527+K09458+K01897+K01897+K00232+K01897+K10251+K00232+K10256+K10251+K01897+K01897+K03921+K00232+K07513+K10258+K03921+K00232+K10256+K00059
Metabolism	Lipid metabolism	Glycerolipid metabolism	28	95	0.0675678	0.251502	ko00561	Os07g0100300(SQD2.1);Os12g0100500(-);Os11g0158400(-);Os01g0762000(OspPLAIValpha);Os04g0647800(-);Os04g0634700(OsBIDK1);Os06g0563900(-);Os01g0847800(AKR3);Os02g0730000(OsALDH2a);Os01g0783200(-);Os02g0539100(-);Os04g0416900(-);Os02g0714100(OsDGAT);Os06g0270900(OsALDH2B1);Os11g0615000(-);Os11g0186200(OsALDH3H2);Os11g0100600(-);Os05g0196800(OsDGAT);Os03g0268300(-);Os01g0847700(AKR2);Os11g0637800(-);O…	K06119+K01054+K09480+K14674+K00864+K00901+K11155+K00002+K00128+K00901+K09480+K09480+K22848+K00128+K15728+K00128+K01054+K11155+K09480+K00002+K13523+K15728+K01054+K18693+K18693+K00128+K13519+K07407
Metabolism	Glycan biosynthesis and metabolism	Other types of O-glycan biosynthesis	5	11	0.0782739	0.283478	ko00514	Os08g0559300(SPY);Os01g0272600(OsRDN);Os01g0904500(-);Os06g0180000(-);Os05g0386000(-)	K09667+K20782+K20781+K20782+K20782
Metabolism	Metabolism of cofactors and vitamins	Ubiquinone and other terpenoid-quinone biosynthesis	18	58	0.0830602	0.292546	ko00130	Os10g0578950(OsACS2);Os01g0662700(-);Os02g0177600(4CL3);Os12g0615400(-);Os06g0345200(OsNAAT4);Os03g0691400(-);Os08g0388900(-);Os02g0302200(-);Os02g0467600(C4H1);Os01g0784800(-);Os01g0901500(OsACS5);Os08g0448000(4CL5);Os03g0152400(OsACS1);Os07g0280200(OsACS7);Os02g0701600(OsVTE4);Os02g0168100(OsHPPD);Os04g0217900(-);Os02g0697400(4CL2)	K01904+K01661+K01904+K12502+K00815+K19222+K06125+K00815+K00487+K03809+K01904+K01904+K01904+K01904+K05928+K00457+K12501+K01904
Metabolism	Biosynthesis of other secondary metabolites	Flavonoid biosynthesis	19	62	0.0851439	0.292546	ko00941	Os05g0526900(OsUGT706D2);Os04g0500700(OsHCT1);Os11g0530600(CHS*);Os01g0735900(OsUGT706B1);Os08g0498600(ROMT-27);Os05g0494000(OsC3'H1);Os02g0467600(C4H1);Os10g0116400(-);Os01g0697100(-);Os04g0630800(-);Os01g0736100(OsUGT706C1);Os05g0527000(OsUGT706C3);Os06g0165800(ROMT-16);Os04g0662600(OsF3H-1);Os04g0103900(CHS);Os12g0240900(NOMT);Os01g0734800(OsUGT706F1);Os04g0664600(-);Os10g0196000(-)	K22845+K13065+K00660+K22845+K00588+K09754+K00487+K22845+K22845+K08695+K22845+K22845+K00588+K00475+K00660+K22440+K22845+K13065+K09754
Environmental Information Processing	Membrane transport	ABC transporters	16	51	0.0907188	0.303908	ko02010	Os05g0196100(OsABCC14);Os04g0209300(OsABCC10);Os01g0393400(-);Os04g0459000(MDR13);Os03g0280000(OsABCB13);Os04g0209200(OsABCC9);Os01g0976100(OsABCB8);Os01g0173900(OsABCC3);Os02g0190300(OsABCB9);Os06g0128300(ABCB23);Os04g0588700(OsABCC7);Os04g0620000(MRP1);Os03g0142800(OsABCC13);Os06g0184766(-);MSTRG.2635(ABCB11);MSTRG.2642(ABCB21)	K05665+K05665+K05658+K05658+K05658+K05665+K05658+K05665+K05658+K05663+K05665+K05665+K05665+K05674+K05658+K05658
Metabolism	Biosynthesis of other secondary metabolites	Isoquinoline alkaloid biosynthesis	10	29	0.0960311	0.310464	ko00950	Os01g0760600(-);Os06g0345200(OsNAAT4);Os06g0338200(OsDAO1);Os06g0548000(-);Os02g0797500(AST);Os01g0871300(-);Os08g0140300(TDC1);Os02g0302200(-);Os10g0400500(-);Os08g0140500(OsTDC3)	K14454+K00815+K00276+K14455+K00811+K15849+K01593+K00815+K01593+K01593
Metabolism	Carbohydrate metabolism	Ascorbate and aldarate metabolism	19	63	0.0973096	0.310464	ko00053	Os12g0612100(-);Os03g0757900(-);Os08g0114300(-);Os02g0730000(OsALDH2a);Os04g0360500(-);Os12g0482700(-);Os03g0563100(-);Os04g0602100(-);Os08g0557600(OsMDAR4);Os08g0151800(OsMDAR5);Os02g0120400(-);Os06g0270900(OsALDH2B1);Os11g0186200(OsALDH3H2);Os04g0434800(OsAPx7);Os11g0591100(OsGME2);Os11g0217300(-);Os12g0443600(-);Os07g0694700(APX2);Os02g0646500(OS-ALDH)	K14190+K00012+K00103+K00128+K00103+K17744+K00103+K00434+K08232+K08232+K16190+K00128+K00128+K00434+K10046+K16190+K00012+K00434+K00128
Metabolism	Metabolism of cofactors and vitamins	Porphyrin and chlorophyll metabolism	16	52	0.104891	0.326871	ko00860	Os10g0369000(OsERS1);Os06g0704600(ALAD);Os10g0419600(OsCHL);Os01g0227100(NYC1);Os01g0949400(Se13);Os01g0631200(-);Os08g0532200(GSA);Os03g0654600(NOL);Os04g0490100(-);Os08g0496000(-);Os03g0146400(OsPAO);Os01g0527700(-);Os10g0496900(FGL);Os09g0532000(SGR);Os10g0389300(OsRCCR2);Os03g0337600(UroD)	K01885+K01698+K08099+K13606+K08101+K02303+K01845+K13606+K00231+K02259+K13071+K02257+K00218+K22013+K13545+K01599
Genetic Information Processing	Translation	Aminoacyl-tRNA biosynthesis	19	64	0.110524	0.336597	ko00970	Os07g0163500(WP1);Os10g0369000(OsERS1);Os09g0503400(-);Os03g0111700(-);Os05g0150900(-);Os08g0538000(-);Os03g0209600(-);Os12g0443700(-);Os04g0680550(-);Os05g0182800(-);Os10g0400800(-);Os08g0295300(-);Os05g0241100(-);Os02g0778200(-);Os03g0694900(OsValRS1);Os05g0558900(PAL11);Os03g0586800(-);Os02g0623500(-);Os09g0378300(-)	K01873+K01885+K01869+K01873+K01892+K01880+K01874+K01881+K01866+K01886+K01889+K01868+K01869+K01870+K01873+K01890+K04567+K04567+K01869
Metabolism	Carbohydrate metabolism	Glyoxylate and dicarboxylate metabolism	26	92	0.114964	0.342337	ko00630	Os06g0486900(FDH2);Os06g0486800(OsFDH);Os07g0529000(OsEnS-107);Os01g0574600(OsGLYR2);Os08g0434300(MDH);Os02g0735200(OsGS1);Os05g0429000(OsSHM5);Os06g0727200(CATB);Os12g0291400(RbcS5);Os11g0455800(OsSHM2);Os01g0829800(-);Os01g0764900(-);Os02g0194100(-);Os07g0616500(GLO5);Os02g0525900(-);Os03g0136900(-);Os12g0632700(-);Os02g0115700(CATA1);Os01g0874900(OsSHM4);Os04g0107500(-);Os08g0198700(GLO6);Os04…	K00122+K00122+K01637+K18121+K00026+K01915+K00600+K03781+K01602+K00600+K00026+K01455+K01647+K11517+K01895+K01681+K00026+K03781+K00600+K15919+K11517+K00605+K11517+K00026+K15919+K01601
Metabolism	Metabolism of terpenoids and polyketides	Limonene and pinene degradation	4	9	0.12202	0.355449	ko00903	Os02g0730000(OsALDH2a);Os06g0270900(OsALDH2B1);Os11g0186200(OsALDH3H2);Os02g0646500(OS-ALDH)	K00128+K00128+K00128+K00128
Metabolism	Metabolism of terpenoids and polyketides	Zeatin biosynthesis	13	42	0.130199	0.371206	ko00908	Os02g0206400(-);Os04g0523500(OsCKX8);Os04g0556400(-);Os04g0565200(-);Os01g0175850(-);Os02g0206700(-);Os10g0178500(OsUGT98B3);Os07g0660500(-);Os05g0311801(-);Os05g0177500(-);Os01g0968700(OsIPT9);Os03g0810100(OsIPT4);Os01g0197700(Gn1a)	K13496+K00279+K13495+K13495+K13496+K13496+K13496+K13495+K10760+K13496+K00791+K10760+K00279
Metabolism	Metabolism of terpenoids and polyketides	Sesquiterpenoid and triterpenoid biosynthesis	7	20	0.142149	0.396833	ko00909	Os03g0347900(-);Os08g0139700(OsTPS29);Os07g0218200(TPS3);Os11g0189600(OsOSC7);Os07g0200700(-);Os11g0285000(OsOSC8);MSTRG.18365(TPS7)	K15803+K15803+K15803+K19010+K00801+K19011+K15803
Metabolism	Biosynthesis of other secondary metabolites	Phenylpropanoid biosynthesis	67	266	0.15835	0.433037	ko00940	Os07g0677100(POX8.1);Os02g0627100(OsPAL1);Os06g0306300(prx78);Os07g0676900(prx109);Os01g0963000(prx22);Os10g0578950(OsACS2);Os02g0187800(GH2);Os12g0111800(-);Os01g0327100(prx15);Os04g0500700(OsHCT1);Os03g0762300(-);Os08g0441500(OsCCR);Os10g0109300(PRX125);Os01g0326100(RP-2);Os02g0626400(OsPAL);Os02g0177600(4CL3);Os01g0326300(-);Os02g0626100(OsPAL);Os01g0771900(-);Os02g0240300(prx29);Os07g0638400(…	K00430+K10775+K00430+K00430+K00430+K01904+K00083+K00430+K00430+K13065+K00430+K09753+K00430+K00430+K10775+K01904+K00430+K13064+K05349+K00430+K11188+K00430+K00588+K23260+K00083+K10775+K00430+K00430+K00430+K01188+K01188+K00430+K01188+K00430+K09754+K10775+K00430+K00487+K01904+K10775+K01188+K13066+K00430+K01904+K00430+K00430+K05350+K00588+K01904+K01188+K00430+K00430+K05349+K00083+K01904+K09755+K01188+…
Metabolism	Carbohydrate metabolism	Fructose and mannose metabolism	20	73	0.190866	0.51152	ko00051	Os08g0120600(-);Os08g0345700(OsPFPA3);Os03g0828300(-);Os03g0294200(OsF2KP2);Os01g0722700(OsHXK9);Os10g0405600(OsPFK10);Os06g0608700(OsAld-Y);Os03g0115100(-);Os01g0118000(-);Os03g0268400(OsMPG3);Os06g0311600(-);Os06g0151900(OsPFK06);Os09g0415800(OsPFK08);Os05g0164100(OsF2KP1);Os06g0137700(-);Os05g0187100(HXK7);Os09g0298100(OsPFPA4);Os01g0191700(OsPFK01);Os08g0113100(OsFKII);Os06g0652400(-)	K01623+K00895+K19355+K01103+K00844+K00850+K01623+K05305+K01623+K00966+K19355+K00850+K00850+K01103+K01711+K00844+K00895+K00850+K00847+K02377
Metabolism	Energy metabolism	Oxidative phosphorylation	45	180	0.231521	0.601865	ko00190	Os03g0295500(-);Os05g0533700(-);Os01g0659200(v-ATP-E);Os06g0662000(PLS1);Os02g0550100(-);Os04g0498200(OsCOX6b2);Os03g0772800(-);Os10g0320400(-);Os02g0768600(-);Os06g0568200(OsVHA-B);Os08g0496000(-);Os04g0656100(AHA7);Os11g0169900(-);Os03g0806900(-);Os03g0713400(-);Os12g0168900(-);Os01g0527700(-);Os01g0834200(-);Os03g0689300(OSA1);Os10g0184300(-);Os05g0438500(-);Os06g0646500(-);Os06g0714100(-);Os0…	K03952+K03940+K02150+K02145+K02155+K02267+K02266+K02136+K01507+K02147+K02259+K01535+K02155+K00417+K03934+K02155+K02257+K02154+K01535+K02154+K01507+K02137+K03965+K02149+K02133+K02267+K01507+K02148+K02151+K01507+K05575+K02111+K05576+K05578+K03881+K02262+K05573+K02110+K02112+K02132+K02110+K05573+K05577+K02128+K05577
Metabolism	Carbohydrate metabolism	Galactose metabolism	18	67	0.23356	0.601865	ko00052	Os07g0687900(wsi76);Os04g0664900(OsCIN5);Os02g0534400(OSCIN1);Os05g0539400(OsBgal9);Os01g0722700(OsHXK9);Os10g0405600(OsPFK10);Os03g0808900(-);Os06g0151900(OsPFK06);Os09g0415800(OsPFK08);Os04g0458600(-);Os04g0458300(GalM4);Os05g0187100(HXK7);Os09g0526700(OsUGE3);Os01g0191700(OsPFK01);Os09g0323000(OsUGE4);Os05g0595100(OsUGE1);Os10g0155500(-);Os07g0679300(alpha-Gal)	K18819+K01193+K01193+K12309+K00844+K00850+K06617+K00850+K00850+K01785+K01785+K00844+K01784+K00850+K01784+K01784+K01785+K07407
Metabolism	Amino acid metabolism	Histidine metabolism	7	23	0.245558	0.610075	ko00340	Os02g0541325(-);Os02g0730000(OsALDH2a);Os01g0232700(-);Os06g0270900(OsALDH2B1);Os11g0186200(OsALDH3H2);Os03g0256400(-);Os02g0646500(OS-ALDH)	K01590+K00128+K00013+K00128+K00128+K01663+K00128
Metabolism	Glycan biosynthesis and metabolism	N-Glycan biosynthesis	12	43	0.245851	0.610075	ko00510	Os02g0749450(-);Os01g0921200(OsMOGS);Os04g0675500(Stt3a);Os03g0821800(-);Os01g0911200(-);Os05g0519900(-);Os03g0565100(-);Os06g0245700(-);Os07g0209000(OsDGL1);Os04g0693000(-);Os05g0301500(-);Os04g0397000(dad-1)	K09659+K01228+K07151+K00729+K12667+K07151+K12669+K01231+K12670+K12666+K12666+K12668
Metabolism	Amino acid metabolism	Tryptophan metabolism	21	81	0.265925	0.64789	ko00380	Os09g0528700(OsCYP76M7);Os04g0475600(-);Os04g0184100(-);Os04g0117900(OsAMI2);Os03g0790900(AAO3);Os06g0328900(-);Os09g0344500(ZRP4);Os01g0274100(OsYUCCA10);Os06g0727200(CATB);Os10g0515200(-);Os02g0730000(OsALDH2a);Os08g0140300(TDC1);Os10g0400500(-);Os02g0592000(-);Os06g0270900(OsALDH2B1);Os11g0186200(OsALDH3H2);Os02g0115700(CATA1);Os01g0645400(YUCCA1);Os08g0140500(OsTDC3);Os02g0646500(OS-ALDH);Os0…	K07408+K23947+K01426+K01426+K11817+K07408+K22588+K11816+K03781+K07408+K00128+K01593+K01593+K23947+K00128+K00128+K03781+K11816+K01593+K00128+K00658
Metabolism	Metabolism of other amino acids	Glutathione metabolism	33	132	0.27317	0.653658	ko00480	Os11g0588300(OsGSTT1);Os01g0654500(-);Os01g0371500(OsGSTF10);Os01g0949700(OsGSTU7);Os02g0813500(OsGR2);Os04g0485300(OsG6PDH2);Os10g0528300(OsGSTU4);Os03g0318500(OsG6PDH5);Os10g0528100(OsGSTU24);Os01g0369700(OsGSTF5);Os02g0794700(-);Os08g0562700(-);Os03g0358100(OsGpx2);Os06g0111500(Os6PGDH1);Os10g0529400(OsGSTU9);Os12g0434400(-);Os02g0600400(OsG6PDH1);Os10g0527800(OsGSTU12);Os04g0602100(-);Os01g03…	K00799+K00031+K00799+K00799+K00383+K00036+K00799+K00036+K00799+K00799+K01255+K01256+K00432+K00033+K00799+K01255+K00036+K00799+K00434+K00799+K00799+K00432+K00799+K00799+K00434+K00383+K00799+K00799+K00799+K00434+K01919+K00799+K00799
Metabolism	Lipid metabolism	Linoleic acid metabolism	6	20	0.284054	0.667777	ko00591	Os01g0762000(OspPLAIValpha);Os02g0194700(OsLOX1);Os04g0447100(SPH);Os08g0509100(OsLOX8);Os03g0700700(OsLOX1);Os08g0508800(Lox2:Os:1)	K14674+K00454+K00454+K00454+K15718+K00454
Metabolism	Amino acid metabolism	Arginine and proline metabolism	18	70	0.300284	0.69376	ko00330	Os06g0131300(ADC1);Os02g0611200(SAMDC2);Os04g0184100(-);Os05g0536400(-);Os01g0760600(-);Os04g0117900(OsAMI2);Os06g0548000(-);Os10g0550900(OsProDH);Os02g0797500(AST);Os02g0730000(OsALDH2a);Os04g0106300(OsARG);Os09g0368200(PAOb);Os06g0270900(OsALDH2B1);Os11g0186200(OsALDH3H2);Os04g0671200(PAO4);Os03g0803500(-);Os02g0646500(OS-ALDH);Os03g0643300(OsOAT)	K01583+K01611+K01426+K00294+K14454+K01426+K14455+K00318+K00811+K00128+K01476+K13366+K00128+K00128+K17839+K00472+K00128+K00819
Genetic Information Processing	Translation	Ribosome	85	359	0.310048	0.704178	ko03010	Os12g0167900(RPL3A);Os11g0151300(OsRPL26.1);Os01g0276000(-);Os07g0180900(-);Os02g0103700(-);Os11g0127900(OsRP1);Os03g0182600(-);Os05g0565000(RPL18A);Os04g0413600(-);Os11g0433900(OsRPL38);Os12g0133050(-);Os05g0490100(-);Os11g0602500(-);Os05g0477300(-);Os11g0482000(RPS5A);Os10g0411800(-);Os06g0115500(-);Os02g0198900(OsRPL7/L12);Os01g0191100(-);Os02g0815000(OsRPL37);Os01g0100700(RPS5);Os09g0507800(s…	K02925+K02898+K02908+K02930+K02940+K02960+K02998+K02882+K02955+K02923+K02941+K02908+K02997+K02976+K02989+K02962+K02873+K02935+K02943+K02922+K02989+K02936+K02947+K02908+K02974+K02969+K02993+K02880+K02976+K02975+K02873+K02901+K02871+K02957+K02957+K02939+K02988+K02870+K02991+K02960+K02971+K02941+K02987+K02981+K02901+K02984+K02997+K02991+K02987+K02903+K02978+K02949+K02955+K02985+K02900+K02941+K02948+…
Metabolism	Lipid metabolism	Ether lipid metabolism	9	33	0.315756	0.705189	ko00565	Os10g0524400(OsPLDbeta1);Os09g0543100(OsPLDdelta1);Os03g0826600(NPC1);Os01g0762000(OspPLAIValpha);Os01g0310100(OsPLDzeta2);Os01g0172400(OsPLDalpha1);Os06g0604300(OsPLDalpha5);Os03g0852800(OsNPC3);Os02g0676000(-)	K01115+K01115+K01114+K14674+K01115+K01115+K01115+K01114+K13519
Metabolism	Nucleotide metabolism	Pyrimidine metabolism	17	67	0.329443	0.718041	ko00240	Os11g0125900(-);Os02g0736400(OsDHODH1);Os10g0563700(-);Os09g0567900(-);Os01g0654100(-);Os01g0935600(-);Os01g0951200(UMPS1);Os12g0123500(-);Os01g0747500(-);Os01g0807900(-);Os02g0479300(-);Os07g0492000(OsNDPK1);Os01g0712700(-);Os03g0113100(TK);Os08g0557900(-);Os01g0965400(YGL8);Os08g0530000(-)	K14641+K00207+K00940+K01240+K01937+K00943+K13421+K14641+K01465+K01464+K16904+K00940+K01489+K00857+K01240+K09903+K00876
Metabolism	Biosynthesis of other secondary metabolites	Monobactam biosynthesis	4	13	0.332228	0.718041	ko00261	Os08g0342400(-);Os07g0300900(-);Os02g0436400(-);Os04g0254000(-)	K12524+K00928+K00215+K01714
Metabolism	Biosynthesis of other secondary metabolites	Tropane, piperidine and pyridine alkaloid biosynthesis	9	35	0.386491	0.815669	ko00960	Os01g0760600(-);Os06g0345200(OsNAAT4);Os06g0338200(OsDAO1);Os06g0548000(-);Os02g0797500(AST);Os01g0871300(-);Os03g0269100(OsSAG13);Os02g0302200(-);Os11g0438000(-)	K14454+K00815+K00276+K14455+K00811+K15849+K08081+K00815+K08081
Metabolism	Metabolism of cofactors and vitamins	Vitamin B6 metabolism	4	14	0.389573	0.815669	ko00750	Os03g0157900(-);Os10g0377800(-);Os10g0100700(OsPDX1.3b);Os12g0600400(-)	K00831+K23998+K06215+K00868
Metabolism	Biosynthesis of other secondary metabolites	Anthocyanin biosynthesis	1	2	0.399345	0.823265	ko00942	Os07g0148200(-)	K12930
Metabolism	Glycan biosynthesis and metabolism	Glycosphingolipid biosynthesis - ganglio series	2	6	0.405821	0.82394	ko00604	Os05g0539400(OsBgal9);Os07g0575500(-)	K12309+K12373
Metabolism	Carbohydrate metabolism	Butanoate metabolism	9	36	0.422276	0.844552	ko00650	Os02g0112900(OsGABA-T);Os01g0574600(OsGLYR2);Os01g0269000(-);Os04g0614500(-);Os08g0544900(-);Os03g0720300(GDCi);Os04g0614600(OSL2);Os03g0236200(OsGAD3);Os02g0173900(OsALDH5F1)	K16871+K18121+K01640+K16871+K01641+K01580+K16871+K01580+K17761
Metabolism	Lipid metabolism	Arachidonic acid metabolism	5	19	0.430827	0.848982	ko00590	Os03g0829100(-);Os03g0819100(-);Os01g0762000(OspPLAIValpha);Os03g0358100(OsGpx2);Os04g0683850(-)	K08726+K01254+K14674+K00432+K00432
Metabolism	Biosynthesis of other secondary metabolites	Stilbenoid, diarylheptanoid and gingerol biosynthesis	7	28	0.447275	0.86862	ko00945	Os04g0500700(OsHCT1);Os08g0498600(ROMT-27);Os05g0494000(OsC3'H1);Os02g0467600(C4H1);Os06g0165800(ROMT-16);Os04g0664600(-);Os10g0196000(-)	K13065+K00588+K09754+K00487+K00588+K13065+K09754
Metabolism	Amino acid metabolism	Valine, leucine and isoleucine biosynthesis	6	24	0.46226	0.873403	ko00290	Os01g0652600(-);Os12g0138900(OsIPMS2);Os02g0125100(-);Os08g0559600(Dad);Os03g0655700(-);Os03g0231600(-)	K00053+K01649+K01703+K01687+K00052+K00826
Genetic Information Processing	Replication and repair	Non-homologous end-joining	3	11	0.465075	0.873403	ko03450	Os02g0497500(Rad50);Os07g0184900(OsKu70);Os03g0856200(OsKu80)	K10866+K10884+K10885
Genetic Information Processing	Translation	Ribosome biogenesis in eukaryotes	23	99	0.469291	0.873403	ko03008	Os03g0350300(BIP102);Os01g0872700(OsXrn3);Os01g0649000(-);Os05g0176000(OsMed36_2);Os03g0350100(BIP101);Os03g0858100(-);Os03g0333100(-);Os02g0103900(-);Os10g0573900(OsNMD3);Os02g0618250(-);Os11g0545000(-);Os07g0603200(-);Os03g0300300(OsWD40-68);Os04g0662100(-);Os03g0151700(OsWD40-63);Os12g0609800(OsWD40-199);Os05g0574500(OsRAN2);Os02g0114700(-);Os10g0456900(-);Os03g0833700(-);Os04g0592700(OsWD40-1…	K14565+K12619+K14546+K14563+K14565+K14290+K14569+K14557+K07562+K11130+K14565+K14553+K14546+K14560+K14556+K14552+K07936+K11883+K14572+K11108+K14555+K14564+K14568
Metabolism	Lipid metabolism	Glycerophospholipid metabolism	29	128	0.51767	0.895534	ko00564	Os10g0524400(OsPLDbeta1);Os09g0543100(OsPLDdelta1);Os03g0826600(NPC1);Os01g0762000(OspPLAIValpha);Os02g0612100(-);Os04g0634700(OsBIDK1);Os09g0513100(-);Os01g0183000(-);Os08g0224800(-);Os01g0783200(-);Os05g0548900(OsPEAMT2);Os01g0801600(-);Os01g0763600(-);Os01g0310100(OsPLDzeta2);Os01g0172400(OsPLDalpha1);Os06g0604300(OsPLDalpha5);Os11g0123400(-);Os04g0615100(-);Os03g0852800(OsNPC3);Os11g0615000(-…	K01115+K01115+K01114+K14674+K00550+K00901+K22389+K14156+K00967+K00901+K05929+K00006+K01126+K01115+K01115+K01115+K00967+K22389+K01114+K15728+K00999+K13523+K15728+K00981+K18693+K18693+K01126+K01517+K13519
Metabolism	Energy metabolism	Nitrogen metabolism	9	39	0.527849	0.895534	ko00910	Os08g0470200(OsalphaCA6);Os01g0547600(NRT2.4);Os05g0555600(OsGLT2);Os02g0735200(OsGS1);Os04g0543900(OsGDH2);Os01g0764900(-);Os04g0412500(OsalphaCA2);Os01g0639900(BETACA1);Os02g0650900(OsGDH3)	K01674+K02575+K00264+K01915+K00261+K01455+K01674+K01673+K00261
Genetic Information Processing	Folding, sorting and degradation	Protein processing in endoplasmic reticulum	53	236	0.532143	0.895534	ko04141	Os09g0482400(OsHsp80.2);Os03g0832200(CRT);Os01g0102700(-);Os01g0377700(-);Os01g0921200(OsMOGS);Os05g0156300(PDIL2);Os09g0482600(OsHsp90);Os11g0433500(Sec23c);Os06g0716700(GRP94);Os03g0822700(-);Os04g0675500(Stt3a);Os08g0487800(-);Os03g0276500(OsHsp71.1);Os05g0507300(-);Os01g0819500(OsUBC22);Os09g0293400(OsUBC18);Os04g0492500(-);Os05g0460200(OsUBC12);Os11g0199200(ESP2);Os04g0402100(OsCNX);Os01g077…	K04079+K08057+K13250+K14015+K01228+K09584+K04079+K14006+K09487+K09562+K07151+K09487+K03283+K08057+K06689+K06689+K16196+K10575+K09580+K08054+K10085+K03283+K12667+K07151+K09503+K09540+K10956+K14006+K12669+K13993+K10666+K04554+K07953+K14016+K12670+K10088+K03094+K10597+K03347+K12666+K09486+K07953+K12666+K09580+K12275+K08653+K06689+K08057+K10839+K12668+K09490+K10601+K03283
Metabolism	Biosynthesis of other secondary metabolites	Aflatoxin biosynthesis	1	3	0.534516	0.895534	ko00254	Os10g0363300(ACC1)	K11262
Metabolism	Biosynthesis of other secondary metabolites	Benzoxazinoid biosynthesis	1	3	0.534516	0.895534	ko00402	Os03g0797400(OsIGL)	K13222
Metabolism	Metabolism of cofactors and vitamins	Pantothenate and CoA biosynthesis	8	35	0.545579	0.895534	ko00770	Os01g0652600(-);Os02g0736400(OsDHODH1);Os07g0179400(-);Os08g0559600(Dad);Os01g0807900(-);Os06g0207000(-);Os03g0231600(-);Os08g0176100(-)	K00053+K00207+K02201+K01687+K01464+K09680+K00826+K01922
Metabolism	Metabolism of terpenoids and polyketides	Brassinosteroid biosynthesis	6	26	0.54804	0.895534	ko00905	Os03g0602300(brd1);Os01g0388101(-);Os02g0204700(OsCYP734A2);Os12g0139300(OsCPD2);Os06g0600400(OsCYP734A4);Os03g0227700(OsDWF4)	K09590+K15639+K15639+K09588+K15639+K09587
Genetic Information Processing	Translation	RNA transport	44	197	0.550611	0.895534	ko03013	Os01g0635400(OsWD40-20);Os05g0104800(EIF3F);Os01g0550000(AIP2);Os02g0139200(OsPRMT5);Os03g0177900(rfa3*);Os08g0176800(OsWD40-156);Os03g0858100(-);Os05g0256000(OsWD40-116);Os10g0536000(OsSce1);Os03g0178000(rfa2*);Os01g0746200(NUP85);Os10g0573900(OsNMD3);Os11g0643700(-);Os07g0685400(-);Os03g0225500(NUP133);Os09g0115400(OsPABPC1);Os06g0338900(-);Os01g0970400(p26);Os06g0701100(eIF-4a);Os11g0132700(-)…	K14298+K03249+K12812+K02516+K03231+K14298+K14290+K03246+K10577+K03231+K14304+K07562+K14301+K14317+K14300+K13126+K03241+K03259+K03257+K14320+K12160+K14297+K03113+K03250+K03113+K03231+K03254+K00784+K07936+K13126+K14309+K14292+K14311+K14313+K14297+K03238+K03260+K03231+K14326+K14289+K18213+K03113+K14312+K05749
Environmental Information Processing	Signal transduction	Phosphatidylinositol signaling system	19	85	0.555506	0.895534	ko04070	Os03g0319300(OsCam1-1);Os08g0450700(-);Os03g0310800(-);Os12g0562400(OsPLC3);Os07g0687200(OsCam1-2);Os07g0619200(-);Os04g0634700(OsBIDK1);Os05g0491100(CALa*);Os05g0180600(-);Os06g0259000(-);Os01g0783200(-);Os07g0694000(OsPI-PLC1);Os12g0236700(-);Os01g0267900(OsCam1-3);Os02g0123600(-);Os02g0466400(OsITPK4);Os01g0758400(-);Os01g0279300(OsCaM3);Os08g0104700(-)	K02183+K00921+K02183+K05857+K02183+K02183+K00901+K02183+K00914+K00921+K00901+K05857+K00921+K02183+K00999+K00913+K00981+K02183+K00921
Metabolism	Metabolism of other amino acids	Selenocompound metabolism	5	22	0.572541	0.895534	ko00450	Os03g0209600(-);Os05g0105000(-);Os12g0624000(-);Os12g0623900(-);Os12g0287300(OsISC2)	K01874+K08247+K00549+K00549+K11717
Environmental Information Processing	Signal transduction	MAPK signaling pathway - plant	47	212	0.573721	0.895534	ko04016	Os03g0319300(OsCam1-1);Os04g0556000(HMA5);Os05g0592800(OsABIL2);Os06g0665800(HMA9);Os03g0310800(-);Os07g0129300(OsPR1);Os03g0701700(OS-ERS1);Os10g0563700(-);Os01g0826400(OsWRKY24);Os04g0432000(SAPK7);Os09g0325700(PP2C1);Os08g0453700(RbohF);Os07g0416100(-);Os04g0578000(ACS2);Os07g0687200(OsCam1-2);Os07g0619200(-);Os03g0794900(-);Os02g0135200(OsMPK13);Os01g0382000(OsPR1b);Os05g0491100(CALa*);Os07g0…	K02183+K17686+K14497+K17686+K02183+K13449+K14509+K00940+K13424+K14498+K14497+K13447+K13424+K20772+K02183+K02183+K20553+K20538+K13449+K02183+K14516+K14497+K03781+K13424+K20538+K20547+K20536+K20547+K17686+K13449+K20535+K13449+K14498+K00940+K13414+K20717+K02183+K13449+K03781+K20547+K13449+K14497+K17686+K02183+K14497+K13447+K14516
Metabolism	Lipid metabolism	Steroid biosynthesis	10	45	0.575939	0.895534	ko00100	Os01g0103600(-);Os01g0762000(OspPLAIValpha);Os05g0211100(CYP51G3);Os01g0211600(-);Os08g0529800(-);Os11g0707600(OsGL1-11);Os02g0113200(OsCYP51H5);Os03g0405000(-);Os02g0465400(-);Os07g0200700(-)	K01824+K14674+K05917+K09832+K01052+K14424+K05917+K23558+K00213+K00801
Metabolism	Glycan biosynthesis and metabolism	Other glycan degradation	4	18	0.602484	0.895534	ko00511	Os05g0539400(OsBgal9);Os11g0525600(-);Os10g0140200(-);Os07g0575500(-)	K12309+K01191+K01191+K12373
Metabolism	Metabolism of terpenoids and polyketides	Terpenoid backbone biosynthesis	13	60	0.61176	0.895534	ko00900	Os05g0413400(-);Os05g0543400(OsFPPS2);Os01g0802100(OsIspE);Os02g0603800(OsHDS);Os02g0680400(-);Os02g0680600(OsIspF);Os08g0544900(-);Os01g0832000(CDS5);Os01g0106900(OsDXR);Os09g0492700(HMGR);Os07g0190000(OsDXS);Os01g0737800(-);Os02g0668100(OsGGPPS2)	K01823+K00787+K00919+K03526+K06013+K01770+K01641+K15892+K00099+K00021+K01662+K05954+K13789
Metabolism	Metabolism of cofactors and vitamins	Thiamine metabolism	5	23	0.615534	0.895534	ko00730	Os04g0671100(-);Os03g0306900(-);Os12g0236400(ADK-A);Os09g0338400(OsISC1);Os07g0190000(OsDXS)	K00939+K20896+K00939+K04487+K01662
Metabolism	Metabolism of cofactors and vitamins	Nicotinate and nicotinamide metabolism	5	23	0.615534	0.895534	ko00760	Os09g0567900(-);Os11g0191400(-);Os12g0290150(-);Os01g0957000(-);Os08g0557900(-)	K01240+K00858+K03517+K00858+K01240
Organismal Systems	Environmental adaptation	Circadian rhythm - plant	11	51	0.617721	0.895534	ko04712	Os11g0547000(FKF1);Os11g0530600(CHS*);Os05g0571000(OsWD40-123);Os11g0157600(OsPRR59);Os06g0601500(OsbZIP48);Os06g0552900(OsFTL12);Os01g0182600(GI);Os04g0103900(CHS);Os03g0284100(OsPRR73);Os01g0286100(PIL15);MSTRG.10139(RUP1)	K12116+K00660+K16240+K12130+K16241+K16223+K12124+K00660+K12129+K12126+K10143
Metabolism	Glycan biosynthesis and metabolism	Glycosylphosphatidylinositol(GPI)-anchor biosynthesis	6	28	0.627076	0.895534	ko00563	Os01g0580100(-);Os01g0682200(-);Os04g0678800(-);Os02g0688900(-);Os02g0219400(-);Os01g0907300(-)	K05286+K05289+K03434+K05293+K05290+K05291
Metabolism	Amino acid metabolism	Glycine, serine and threonine metabolism	18	84	0.635591	0.895534	ko00260	Os08g0342400(-);Os08g0447000(-);Os07g0300900(-);Os06g0338200(OsDAO1);Os05g0429000(OsSHM5);Os04g0650800(-);Os06g0632200(TS);Os08g0424500(SK2(T)(SCL);Os11g0455800(OsSHM2);Os07g0182100(OsTSA);Os03g0171900(-);Os03g0157900(-);Os12g0502400(-);Os08g0135900(TS);Os01g0874900(OsSHM4);Os04g0107500(-);Os04g0623800(Amt);Os07g0597500(-)	K12524+K00058+K00928+K00276+K00600+K00058+K06001+K00130+K00600+K01695+K00827+K00831+K01079+K01696+K00600+K15919+K00605+K15919
Metabolism	Lipid metabolism	Synthesis and degradation of ketone bodies	2	9	0.635687	0.895534	ko00072	Os01g0269000(-);Os08g0544900(-)	K01640+K01641
Metabolism	Metabolism of other amino acids	Taurine and hypotaurine metabolism	2	9	0.635687	0.895534	ko00430	Os03g0720300(GDCi);Os03g0236200(OsGAD3)	K01580+K01580
Metabolism	Metabolism of other amino acids	Phosphonate and phosphinate metabolism	2	9	0.635687	0.895534	ko00440	Os08g0224800(-);Os11g0123400(-)	K00967+K00967
Metabolism	Nucleotide metabolism	Purine metabolism	23	107	0.636348	0.895534	ko00230	Os07g0613000(-);Os03g0429800(-);Os04g0671100(-);Os11g0125900(-);Os03g0780500(OsCBSIMPDH1);Os02g0625500(-);Os10g0563700(-);Os09g0442600(-);Os05g0161500(-);Os12g0145700(-);Os12g0123500(-);Os01g0865100(-);Os03g0313600(-);Os11g0216000(-);Os07g0492000(OsNDPK1);Os12g0597500(OsUAH);Os12g0236400(ADK-A);Os01g0888500(-);Os07g0484800(-);Os11g0148500(OsPK1);Os08g0557200(-);Os01g0873100(-);Os07g0181000(OsPKpa…	K00951+K00106+K00939+K14641+K00088+K00856+K00940+K00951+K00951+K00873+K14641+K00365+K01756+K00873+K00940+K18151+K00939+K01952+K00759+K00873+K01517+K00764+K00873
Metabolism	Lipid metabolism	Fatty acid biosynthesis	11	52	0.645496	0.895534	ko00061	Os06g0596300(-);Os10g0363300(ACC1);Os06g0196600(OsKASI);Os05g0317200(LACS8);Os01g0681200(-);Os12g0168700(LACS1);Os11g0147000(-);Os01g0655800(-);Os04g0379900(-);Os03g0423300(-);Os10g0456100(-)	K10781+K11262+K09458+K01897+K01897+K01897+K01897+K01897+K03921+K03921+K00059
Metabolism	Metabolism of cofactors and vitamins	One carbon pool by folate	4	19	0.64826	0.895534	ko00670	Os05g0429000(OsSHM5);Os11g0455800(OsSHM2);Os01g0874900(OsSHM4);Os04g0623800(Amt)	K00600+K00600+K00600+K00605
Genetic Information Processing	Folding, sorting and degradation	SNARE interactions in vesicular transport	9	44	0.684704	0.931341	ko04130	Os03g0791500(-);Os06g0168500(-);Os09g0416700(-);Os05g0553700(-);Os01g0707300(-);Os11g0168200(RPL3B);Os02g0119400(-);Os08g0440000(-);Os06g0116300(-)	K08517+K08486+K08495+K08506+K08493+K08498+K08501+K08495+K08489
Metabolism	Glycan biosynthesis and metabolism	Glycosphingolipid biosynthesis - globo and isoglobo series	2	10	0.695031	0.931341	ko00603	Os07g0575500(-);Os07g0679300(alpha-Gal)	K12373+K07407
Metabolism	Carbohydrate metabolism	C5-Branched dibasic acid metabolism	2	10	0.695031	0.931341	ko00660	Os02g0125100(-);Os03g0655700(-)	K01703+K00052
Genetic Information Processing	Folding, sorting and degradation	Ubiquitin mediated proteolysis	33	158	0.717924	0.945178	ko04120	Os12g0626300(APC5);Os05g0592400(UV-DDB1);Os09g0252800(-);Os11g0497000(-);Os05g0425700(OsFbox258);Os12g0105950(-);Os01g0819500(OsUBC22);Os01g0271500(-);Os09g0293400(OsUBC18);Os10g0536000(OsSce1);Os05g0159000(-);Os05g0460200(OsUBC12);Os05g0557700(LTN1);Os03g0145900(-);Os10g0466300(OsWD40-178);Os04g0643000(OsCUL3b);Os09g0252700(-);Os05g0557600(OsUBC41);Os03g0348900(OsSRFP1);Os09g0484300(-);Os06g0193…	K03352+K10610+K10592+K10684+K03875+K03178+K06689+K10686+K06689+K10577+K10589+K10575+K10581+K10144+K10599+K03869+K10592+K10581+K10144+K10591+K04554+K03094+K10597+K03347+K03178+K03178+K10688+K04506+K06689+K10573+K10573+K10601+K10143
Cellular Processes	Transport and catabolism	Endocytosis	36	172	0.719464	0.945178	ko04144	Os10g0524400(OsPLDbeta1);Os10g0441800(OsRab5A2);Os01g0813400(OsARFA1a);Os02g0437800(-);Os03g0186800(-);Os04g0669300(-);Os09g0543100(OsPLDdelta1);Os10g0377400(OsRab11E1);Os01g0862300(-);Os01g0661500(-);Os03g0276500(OsHsp71.1);Os01g0227300(OsRab7B1);Os12g0121400(-);Os02g0193800(-);Os12g0631100(GLUP4);Os11g0629200(-);Os02g0806600(-);Os01g0813500(-);Os01g0840100(OsMed37_1);Os07g0563800(-);Os01g068770…	K01115+K07889+K07937+K12479+K12185+K12483+K01115+K07904+K17917+K11866+K03283+K07897+K12194+K18442+K07889+K18466+K12471+K12190+K03283+K12486+K19476+K07889+K18468+K07904+K01115+K01115+K10591+K07904+K12492+K12493+K01115+K19476+K18442+K07904+K12200+K03283
Metabolism	Lipid metabolism	Fatty acid elongation	9	46	0.73752	0.955182	ko00062	Os07g0162100(-);Os06g0598800(WSL1);Os05g0574600(OsCHS);Os01g0529800(-);Os04g0116600(-);Os06g0299100(-);Os03g0382100(-);Os02g0731900(-);Os01g0150000(CER10)	K10258+K15397+K15397+K15397+K10251+K10251+K15397+K15397+K10258
Metabolism	Biosynthesis of other secondary metabolites	Flavone and flavonol biosynthesis	2	11	0.746132	0.955182	ko00944	Os01g0176000(OsUGT98B1);Os01g0176200(-)	K22771+K22771
Genetic Information Processing	Folding, sorting and degradation	Protein export	12	61	0.748463	0.955182	ko03060	Os05g0509500(-);Os09g0453400(OsSigP6);Os04g0446300(-);Os05g0297900(OsSigP4);Os10g0521300(-);Os04g0307200(OsDjC43);Os03g0213100(-);Os06g0273800(OsSigP5);Os02g0435000(OsNSCC2);Os01g0772800(-);Os01g0501700(OsTATC);Os02g0115900(OsBiP1)	K03106+K03100+K12947+K13280+K03217+K09540+K10956+K13280+K12275+K03106+K03118+K09490
Organismal Systems	Environmental adaptation	Plant-pathogen interaction	61	292	0.770577	0.965203	ko04626	Os01g0505600(OsCML11);Os09g0482400(OsHsp80.2);Os03g0319300(OsCam1-1);Os01g0622600(OsCDPK1);Os07g0186500(-);Os09g0482600(OsHsp90);Os05g0223000(OsCML18);Os06g0698802(-);Os06g0598800(WSL1);Os06g0716700(GRP94);Os03g0310800(-);Os07g0129300(OsPR1);Os01g0826400(OsWRKY24);Os08g0487800(-);Os08g0453700(RbohF);Os05g0312600(OsCML21);Os11g0229400(-);Os05g0574600(OsCHS);Os07g0416100(-);Os07g0687200(OsCam1-2);O…	K13448+K04079+K02183+K13412+K13457+K04079+K13448+K13457+K15397+K09487+K02183+K13449+K13424+K09487+K13447+K13448+K13457+K15397+K13424+K02183+K02183+K13473+K00864+K13449+K13457+K02183+K13448+K13429+K13424+K20536+K13412+K15397+K05391+K13459+K13459+K13449+K13448+K13412+K13457+K13437+K13449+K13412+K13457+K13414+K15397+K13412+K02183+K13448+K13412+K13456+K13449+K13457+K15397+K13412+K13449+K13457+K13412+…
Metabolism	Glycan biosynthesis and metabolism	Glycosaminoglycan degradation	3	17	0.771916	0.965203	ko00531	Os05g0539400(OsBgal9);Os11g0543500(-);Os07g0575500(-)	K12309+K10532+K12373
Metabolism	Carbohydrate metabolism	Inositol phosphate metabolism	15	77	0.777925	0.965203	ko00562	Os08g0109100(-);Os08g0450700(-);Os03g0826600(NPC1);Os12g0562400(OsPLC3);Os05g0180600(-);Os06g0259000(-);Os07g0188800(OsALDH6B2);Os07g0694000(OsPI-PLC1);Os12g0236700(-);Os02g0782600(-);Os03g0852800(OsNPC3);Os02g0123600(-);Os02g0466400(OsITPK4);Os09g0518700(OsITPK6);Os08g0104700(-)	K22913+K00921+K01114+K05857+K00914+K00921+K00140+K05857+K00921+K22913+K01114+K00999+K00913+K01765+K00921
Metabolism	Energy metabolism	Photosynthesis	18	92	0.7871	0.967627	ko00195	Os04g0473150(-);Os03g0659266(-);Os03g0784700(FNR);Os06g0107700(OsLFNR2);Os06g0101600(OsPC);Os05g0508900(-);Os03g0835900(OsFd3);Os07g0147900(-);gene-psbA(-);gene-psaC(-);gene-atpA(-);gene-psaB(-);gene-psbB(-);gene-psbF(-);MSTRG.19036(psbD);MSTRG.20157(atpH);MSTRG.24928(atpB);MSTRG.32198(atpH)	K02703+K02708+K02641+K02641+K02638+K02721+K02639+K02641+K02703+K02691+K02111+K02690+K02704+K02708+K02705+K02110+K02112+K02110
Metabolism	Carbohydrate metabolism	Starch and sucrose metabolism	40	197	0.79722	0.971158	ko00500	Os06g0726400(SBE1);Os07g0412100(GBSSII);Os04g0664900(OsCIN5);Os02g0534400(OSCIN1);Os06g0367100(-);Os05g0580000(OsAGPL3);Os01g0722700(OsHXK9);Os05g0533600(SSIVB);Os01g0771900(-);Os03g0340500(SUS4);Os05g0518600(OsTPS1);Os03g0401300(SUS1);Os03g0212800(Os3bglu6);Os01g0236800(OsBamy4);Os01g0730300(OsTPS3);Os04g0474900(OsTAGG1);Os05g0366600(Os5bglu22);Os09g0397300(-);Os09g0465600(-);Os03g0749500(-);Os0…	K00700+K13679+K01193+K01193+K00700+K00975+K00844+K00703+K05349+K00695+K16055+K00695+K01188+K01177+K16055+K01188+K01188+K16055+K01810+K01188+K00703+K01810+K00696+K01194+K05350+K00695+K00844+K01188+K16055+K16055+K05349+K16055+K01188+K05350+K16055+K00975+K01188+K00847+K01177+K16055
Metabolism	Energy metabolism	Sulfur metabolism	7	40	0.828097	0.999684	ko00920	Os08g0530400(OSMCP);Os06g0149900(-);Os04g0165700(OsCAS);Os03g0747800(RCS3);Os01g0978100(-);Os07g0558300(-);Os12g0442800(-)	K00387+K01738+K13034+K01738+K01738+K01082+K00387
Genetic Information Processing	Folding, sorting and degradation	RNA degradation	24	128	0.872816	0.999785	ko03018	Os10g0437200(-);Os02g0774300(OsISC23);Os01g0872700(OsXrn3);Os03g0143400(htpB);Os10g0405600(OsPFK10);Os08g0440200(OsCAF1-11);Os04g0613400(-);Os02g0722800(OsWD40-53);Os06g0151900(OsPFK06);Os09g0415800(OsPFK08);Os09g0115400(OsPABPC1);Os03g0784800(-);Os02g0517300(-);Os02g0641800(OsRH8);Os10g0462900(-);Os04g0504800(OsPABPC3);Os11g0311300(-);Os01g0191700(OsPFK01);Os04g0533000(OsRH6);Os01g0769000(-);Os0…	K12591+K04043+K12619+K04077+K00850+K01148+K12606+K12616+K00850+K00850+K13126+K12606+K12617+K12614+K04077+K13126+K12586+K00850+K12614+K12617+K01689+K04077+K12580+K01689
Cellular Processes	Transport and catabolism	Autophagy - other eukaryotes	7	43	0.880804	0.999785	ko04136	Os03g0122000(-);Os03g0805300(OsPP56);Os05g0180600(-);Os07g0512200(Atg8);Os11g0100100(OsATG8e);Os11g0109933(-);Os03g0248000(OsATG9a)	K08269+K04382+K00914+K08341+K08341+K07204+K17907
Metabolism	Metabolism of terpenoids and polyketides	Carotenoid biosynthesis	6	38	0.886475	0.999785	ko00906	Os02g0817900(CYP97A4);Os12g0405200(-);Os07g0154100(OSNCED3);Os04g0578400(OsBCH2);Os07g0204900(-);Os03g0645900(OsNCED1)	K15747+K15744+K09840+K15746+K00514+K09840
Metabolism	Metabolism of terpenoids and polyketides	Monoterpenoid biosynthesis	1	10	0.92197	0.999785	ko00902	Os04g0531900(-)	K15095
Metabolism	Amino acid metabolism	Lysine degradation	7	50	0.95358	0.999785	ko00310	Os02g0730000(OsALDH2a);Os11g0602200(OsSET41);Os05g0490700(OsSET22);Os06g0270900(OsALDH2B1);Os11g0186200(OsALDH3H2);Os02g0646500(OS-ALDH);Os04g0394200(-)	K00128+K11420+K11420+K00128+K00128+K00128+K00658
Environmental Information Processing	Signal transduction	Plant hormone signal transduction	52	280	0.956395	0.999785	ko04075	Os03g0180800(TIFY11A);Os05g0515400(OsARF14);Os01g0767900(OsNH2);Os06g0714300(OsSAUR29);Os05g0592800(OsABIL2);Os07g0592600(GH3-8);Os06g0696600(OsXTH12);Os07g0129300(OsPR1);Os03g0701700(OS-ERS1);Os03g0402800(OsJAZ5);Os04g0432000(SAPK7);Os09g0325700(PP2C1);Os01g0764800(GH3-2);Os05g0407500(GID1);Os06g0183100(ORR2);Os12g0609200(-);Os01g0808100(OsbZIP08);Os12g0601400(OsIAA3);Os01g0382000(OsPR1b);Os07g0…	K13464+K14486+K14508+K14488+K14497+K14487+K14504+K13449+K14509+K13464+K14498+K14497+K14487+K14493+K14491+K13464+K14431+K14484+K13449+K14516+K14497+K14488+K14431+K13464+K14489+K13464+K14504+K13449+K13464+K14484+K13449+K14502+K14498+K13464+K13464+K14490+K14487+K13449+K13464+K13449+K14486+K14497+K14484+K13463+K14491+K14497+K14431+K14431+K12126+K14516+K13463+K14431
Metabolism	Lipid metabolism	Cutin, suberine and wax biosynthesis	4	35	0.970746	0.999785	ko00073	Os11g0507200(-);Os02g0621300(OsCER1);Os08g0557800(-);Os04g0511200(EFA27)	K15400+K15404+K13356+K17991
Metabolism	Metabolism of cofactors and vitamins	Biotin metabolism	2	22	0.973069	0.999785	ko00780	Os06g0196600(OsKASI);Os10g0456100(-)	K09458+K00059
Genetic Information Processing	Folding, sorting and degradation	Proteasome	9	66	0.97563	0.999785	ko03050	Os08g0550100(OsRpn3);Os05g0594800(-);Os11g0615700(OsPAE1);Os02g0146700(-);Os02g0800100(-);Os04g0661900(OsRpn8);Os02g0199900(OsRpt4a);Os03g0214600(OsRpn9b);Os02g0325100(OsRpt3)	K03033+K06691+K02729+K03028+K11599+K03038+K03064+K03039+K03063
Genetic Information Processing	Translation	mRNA surveillance pathway	19	124	0.982864	0.999785	ko03015	Os01g0939500(-);Os01g0945800(HNR27C);Os07g0589400(OsWD40-146);Os01g0550000(AIP2);Os02g0820000(OsPP41);Os04g0683100(-);Os10g0470900(RBPJ);Os03g0805300(OsPP56);Os05g0373900(-);Os02g0191700(-);Os09g0115400(OsPABPC1);Os08g0122000(OsPP2A-B'theta);Os05g0543300(OsWD40-121);Os02g0780600(-);Os04g0504800(OsPABPC3);Os12g0571900(-);Os07g0274800(-);Os07g0495900(-);MSTRG.545(B'KAPPA)	K03265+K14411+K14962+K12812+K06269+K14397+K14411+K04382+K03265+K11583+K13126+K11584+K14962+K00565+K13126+K14408+K11584+K14326+K11584
Genetic Information Processing	Folding, sorting and degradation	Sulfur relay system	1	16	0.983151	0.999785	ko04122	Os09g0338400(OsISC1)	K04487
Metabolism	Energy metabolism	Photosynthesis - antenna proteins	1	17	0.986952	0.999785	ko00196	Os01g0600900(CAB2R)	K08912
Metabolism	Metabolism of cofactors and vitamins	Folate biosynthesis	3	34	0.990123	0.999785	ko00790	Os01g0238500(-);Os10g0503200(-);Os02g0592200(-)	K18482+K01930+K01113
Genetic Information Processing	Replication and repair	Mismatch repair	6	55	0.991745	0.999785	ko03430	Os01g0253600(OsRPA14);Os02g0805200(OsPCNA);Os11g0186400(OsPoldelta1);Os02g0592300(OsPMS1);Os02g0633400(RPA2B);Os01g0958900(OsMLH1)	K10740+K04802+K02327+K10858+K10739+K08734
Genetic Information Processing	Replication and repair	Homologous recombination	11	86	0.992542	0.999785	ko03440	Os02g0497500(Rad50);Os01g0253600(OsRPA14);Os04g0637400(-);Os06g0715600(-);Os07g0689950(-);Os04g0648700(EME1);Os03g0304400(-);Os11g0186400(OsPoldelta1);Os05g0486600(BARD1);Os09g0500600(TOP3);Os02g0633400(RPA2B)	K10866+K10740+K02335+K12173+K10728+K10882+K10728+K02327+K10683+K03165+K10739
Metabolism	Metabolism of cofactors and vitamins	Riboflavin metabolism	1	20	0.993942	0.999785	ko00740	Os03g0238600(OsPAP3c)	K14379
Metabolism	Carbohydrate metabolism	Pentose and glucuronate interconversions	9	82	0.997825	0.999785	ko00040	Os03g0757900(-);Os09g0505700(-);Os01g0847800(AKR3);Os02g0120400(-);Os01g0788400(OsPME6);Os07g0640200(-);Os01g0847700(AKR2);Os11g0217300(-);Os12g0443600(-)	K00012+K01783+K00002+K16190+K01051+K00854+K00002+K16190+K00012
Genetic Information Processing	Transcription	RNA polymerase	6	63	0.997972	0.999785	ko03020	Os09g0110400(-);Os04g0394500(OsRPC53);Os01g0679000(-);Os03g0403100(-);Os11g0143400(-);MSTRG.25008(NRPA1)	K03011+K03026+K03023+K03021+K03013+K02999
Genetic Information Processing	Transcription	Basal transcription factors	5	60	0.999023	0.999785	ko03022	Os05g0107700(xa5);Os01g0680400(-);Os10g0397200(-);Os08g0338200(-);Os03g0251800(-)	K03123+K03135+K03137+K03141+K03138
Genetic Information Processing	Transcription	Spliceosome	31	216	0.99917	0.999785	ko03040	Os05g0364600(-);Os01g0316600(-);Os01g0550000(AIP2);Os07g0508000(-);Os03g0276500(OsHsp71.1);Os01g0549400(-);Os11g0310800(-);Os09g0491756(OsC3H60);Os08g0127700(-);Os06g0711600(-);Os02g0122800(-);Os01g0614500(-);Os02g0245000(-);Os01g0840100(OsMed37_1);Os08g0559400(OsCYP18-2);Os10g0466300(OsWD40-178);Os10g0498600(Du1);Os01g0265800(RBP-P);Os02g0252100(-);Os02g0759800(OsSKIPa);Os06g0167000(-);Os02g0147…	K12890+K12890+K12812+K12815+K03283+K12823+K12818+K12836+K12819+K12868+K12893+K12741+K12825+K03283+K12733+K10599+K12855+K12741+K12900+K06063+K12856+K12828+K11095+K12817+K12832+K12874+K12868+K12890+K12741+K03283+K12821
Genetic Information Processing	Replication and repair	DNA replication	6	71	0.999538	0.999785	ko03030	Os01g0253600(OsRPA14);Os04g0637400(-);Os02g0805200(OsPCNA);Os01g0868300(OSPOLA);Os11g0186400(OsPoldelta1);Os02g0633400(RPA2B)	K10740+K02335+K04802+K02320+K02327+K10739
Genetic Information Processing	Replication and repair	Nucleotide excision repair	8	86	0.999634	0.999785	ko03420	Os05g0592400(UV-DDB1);Os01g0253600(OsRPA14);Os04g0637400(-);Os02g0805200(OsPCNA);Os11g0186400(OsPoldelta1);Os08g0338200(-);Os02g0633400(RPA2B);Os06g0264300(RAD23)	K10610+K10740+K02335+K04802+K02327+K03141+K10739+K10839
Genetic Information Processing	Replication and repair	Base excision repair	3	52	0.999785	0.999785	ko03410	Os04g0637400(-);Os02g0805200(OsPCNA);Os11g0186400(OsPoldelta1)	K02335+K04802+K02327

## Sheet:  zj-esa-vs-zj-esb
All enrichment pathways of mRNAs of the comparison between zj-esa and zj-esb.
KEGG_A_class	KEGG_B_class	Pathway	Pir1a-vs-Pir1b (826)	All (5841)	Pvalue	Qvalue	Pathway ID	Genes	K_IDs
Metabolism	Global and overview maps	Metabolic pathways	492	2748	4.82087e-15	6.26713e-13	ko01100	Os07g0677100(POX8.1);Os11g0588300(OsGSTT1);Os08g0342400(-);Os07g0613000(-);Os07g0687900(wsi76);Os06g0726400(SBE1);Os04g0486950(-);Os06g0306300(prx78);Os06g0486900(FDH2);Os01g0654500(-);Os06g0274800(prx77);Os07g0676900(prx109);Os07g0115300(prx98);Os10g0194200(OsCAD1);Os06g0521500(prx83);Os07g0616200(-);Os05g0565500(-);Os05g0387200(-);Os02g0112900(OsGABA-T);Os02g0323600(OsCYP51H4);Os02g0187800(GH2)…	K00430+K00799+K12524+K00951+K18819+K00700+K01638+K00430+K00122+K00031+K00430+K00430+K00430+K00083+K00430+K09458+K00020+K06118+K16871+K05917+K00083+K00106+K01193+K00249+K03847+K00606+K08679+K00161+K00627+K01723+K01193+K07407+K00058+K00799+K14190+K07408+K05286+K00895+K01183+K11147+K11262+K01057+K08099+K08967+K00700+K18857+K00430+K00815+K02150+K13065+K00430+K01754+K12309+K09753+K00122+K19355+K13035+…
Metabolism	Global and overview maps	Biosynthesis of secondary metabolites	308	1549	1.33287e-13	8.66366e-12	ko01110	Os07g0677100(POX8.1);Os08g0342400(-);Os06g0726400(SBE1);Os04g0486950(-);Os06g0306300(prx78);Os01g0654500(-);Os06g0274800(prx77);Os07g0676900(prx109);Os07g0115300(prx98);Os02g0569400(CYP76M8);Os02g0570700(Oscyp71Z7);Os10g0194200(OsCAD1);Os06g0521500(prx83);Os01g0857200(-);Os05g0526900(OsUGT706D2);Os02g0323600(OsCYP51H4);Os02g0187800(GH2);Os03g0429800(-);Os04g0178400(-);Os04g0664900(OsCIN5);Os07g06…	K00430+K12524+K00700+K01638+K00430+K00031+K00430+K00430+K00430+K16084+K21291+K00083+K00430+K11778+K22845+K05917+K00083+K00106+K16085+K01193+K00249+K00606+K00161+K00627+K01723+K01193+K00058+K14190+K00895+K21719+K11262+K01057+K08099+K00700+K18857+K00430+K00815+K13065+K00430+K01754+K14036+K09753+K13035+K09837+K13606+K09834+K08101+K00430+K01114+K10527+K00053+K00800+K18857+K16085+K01738+K08241+K00430+…
Metabolism	Amino acid metabolism	Tyrosine metabolism	24	51	1.52933e-08	6.6271e-07	ko00350	Os11g0210500(Adh2*);Os02g0302700(OsNAAT2);Os11g0210300(ADH1);Os11g0245100(OsGSTZ4);Os01g0760600(-);Os06g0345200(OsNAAT4);Os02g0196800(-);Os06g0338200(OsDAO1);Os06g0548000(-);Os06g0699500(-);Os11g0644800(-);Os02g0797500(AST);Os06g0103300(-);Os01g0871300(-);Os08g0140300(TDC1);Os02g0302200(-);Os11g0210600(Adh3);Os07g0437500(TDC2);Os10g0159800(-);Os02g0168100(OsHPPD);Os03g0189600(-);Os08g0140500(OsTD…	K18857+K00815+K18857+K01800+K14454+K00815+K01555+K00276+K14455+K07253+K00815+K00811+K00451+K15849+K01593+K00815+K00001+K01593+K00001+K00457+K00121+K01593+K00276+K01557
Metabolism	Lipid metabolism	Fatty acid degradation	24	54	6.11241e-08	1.98653e-06	ko00071	Os07g0675000(-);Os05g0529200(-);Os11g0210500(Adh2*);Os01g0348600(-);Os11g0210300(ADH1);Os03g0310400(-);Os01g0110400(-);Os02g0817700(OsI57);Os02g0274100(AIM1);Os02g0730000(OsALDH2a);Os05g0317200(LACS8);Os01g0681200(-);Os11g0210600(Adh3);Os06g0346300(-);Os10g0159800(-);Os11g0605500(ACX2);Os11g0147000(-);Os01g0655800(-);Os06g0270900(OsALDH2B1);Os09g0440300(ALDH7);Os05g0163700(OsACX4);Os03g0189600(-)…	K00249+K07517+K18857+K10527+K18857+K01692+K00626+K07513+K10527+K00128+K01897+K01897+K00001+K00232+K00001+K00232+K01897+K01897+K00128+K14085+K00232+K00121+K00232+K00128
Metabolism	Amino acid metabolism	Phenylalanine metabolism	20	55	3.06581e-05	0.000797111	ko00360	Os02g0302700(OsNAAT2);Os03g0310400(-);Os02g0626400(OsPAL);Os01g0760600(-);Os06g0345200(OsNAAT4);Os02g0626100(OsPAL);Os06g0338200(OsDAO1);Os06g0548000(-);Os06g0699500(-);Os11g0644800(-);Os02g0797500(AST);Os01g0871300(-);Os08g0140300(TDC1);Os02g0302200(-);Os04g0118100(OsAMI1);Os07g0437500(TDC2);Os02g0168100(OsHPPD);Os01g0796400(-);Os08g0140500(OsTDC3);Os06g0338700(-)	K00815+K01692+K10775+K14454+K00815+K13064+K00276+K14455+K07253+K00815+K00811+K15849+K01593+K00815+K01426+K01593+K00457+K00074+K01593+K00276
Metabolism	Biosynthesis of other secondary metabolites	Isoquinoline alkaloid biosynthesis	13	29	6.22116e-05	0.00134792	ko00950	Os02g0302700(OsNAAT2);Os01g0760600(-);Os06g0345200(OsNAAT4);Os06g0338200(OsDAO1);Os06g0548000(-);Os11g0644800(-);Os02g0797500(AST);Os01g0871300(-);Os08g0140300(TDC1);Os02g0302200(-);Os07g0437500(TDC2);Os08g0140500(OsTDC3);Os06g0338700(-)	K00815+K14454+K00815+K00276+K14455+K00815+K00811+K15849+K01593+K00815+K01593+K01593+K00276
Metabolism	Metabolism of terpenoids and polyketides	Diterpenoid biosynthesis	18	53	0.000209141	0.0034352	ko00904	Os02g0569400(CYP76M8);Os02g0570700(Oscyp71Z7);Os04g0178400(-);Os06g0569500(KO4);Os02g0570400(OsKS7);Os04g0180400(CYP99A2);Os04g0179200(OsMAS);Os12g0491800(OsKSL10);Os02g0571900(CYP76M6);Os04g0178300(OsCPS4);Os04g0179700(OsKS4);Os06g0599200(-);Os03g0650200(-);Os06g0568600(OsKO5);Os02g0278700(OsCPS1);Os02g0569900(OsCYP76M7);Os03g0856700(GA20OX1);Os05g0560900(OsGA2ox8)	K16084+K21291+K16085+K21719+K14036+K16085+K13070+K14037+K21718+K14043+K14046+K16084+K22639+K04122+K04120+K16084+K05282+K04125
Metabolism	Metabolism of other amino acids	beta-Alanine metabolism	17	49	0.000233103	0.0034352	ko00410	Os02g0736400(OsDHODH1);Os03g0310400(-);Os06g0338200(OsDAO1);Os02g0730000(OsALDH2a);Os07g0188800(OsALDH6B2);Os01g0807900(-);Os06g0346300(-);Os11g0605500(ACX2);Os12g0264500(-);Os06g0270900(OsALDH2B1);Os09g0440300(ALDH7);Os05g0163700(OsACX4);Os06g0354500(ACX3);Os04g0671200(PAO4);Os06g0338700(-);Os03g0236200(OsGAD3);Os02g0646500(OS-ALDH)	K00207+K01692+K00276+K00128+K00140+K01464+K00232+K00232+K05605+K00128+K14085+K00232+K00232+K17839+K00276+K01580+K00128
Metabolism	Global and overview maps	Fatty acid metabolism	26	91	0.000237822	0.0034352	ko01212	Os07g0616200(-);Os07g0675000(-);Os10g0363300(ACC1);Os01g0348600(-);Os03g0310400(-);Os01g0110400(-);Os04g0271200(OsPAS2);Os08g0225000(ZL16);Os07g0417200(OsFAD2-2);Os02g0817700(OsI57);Os02g0274100(AIM1);Os04g0376300(-);Os05g0317200(LACS8);Os01g0681200(-);Os06g0346300(-);Os04g0116600(-);Os11g0605500(ACX2);Os07g0416900(OsFAD2-3);Os06g0299100(-);Os11g0147000(-);Os01g0655800(-);Os05g0163700(OsACX4);Os0…	K09458+K00249+K11262+K10527+K01692+K00626+K10703+K02372+K10256+K07513+K10527+K00059+K01897+K01897+K00232+K10251+K00232+K10256+K10251+K01897+K01897+K00232+K00232+K00645+K10256+K00059
Cellular Processes	Transport and catabolism	Peroxisome	28	102	0.000291084	0.00378409	ko04146	Os01g0654500(-);Os03g0429800(-);Os09g0133200(-);Os03g0829100(-);Os06g0115400(OsFSD1.1);Os02g0817700(OsI57);Os05g0323900(SODA1);Os06g0727200(CATB);Os03g0708100(OMT7);Os07g0665200(Cu/Zn-SOD);Os01g0505400(-);Os01g0269000(-);Os05g0317200(LACS8);Os01g0681200(-);Os08g0500100(OsPEX5);Os06g0346300(-);Os02g0123200(-);Os07g0616500(GLO5);Os07g0608800(OsRFP);Os11g0605500(ACX2);Os11g0147000(-);Os01g0655800(-)…	K00031+K00106+K11147+K08726+K04564+K07513+K04564+K03781+K00477+K04565+K12261+K01640+K01897+K01897+K13342+K00232+K13335+K11517+K13346+K00232+K01897+K01897+K00232+K03781+K04565+K00232+K13356+K13354
Metabolism	Carbohydrate metabolism	Propanoate metabolism	13	34	0.000429348	0.00507411	ko00640	Os10g0363300(ACC1);Os03g0310400(-);Os01g0110400(-);Os12g0183100(-);Os07g0188800(OsALDH6B2);Os06g0346300(-);Os11g0605500(ACX2);Os02g0525900(-);Os12g0264500(-);Os01g0314100(-);Os05g0163700(OsACX4);Os06g0354500(ACX3);Os05g0156700(-)	K11262+K01692+K00626+K00166+K00140+K00232+K00232+K01895+K05605+K09699+K00232+K00232+K00382
Metabolism	Lipid metabolism	alpha-Linolenic acid metabolism	19	61	0.00049647	0.00519621	ko00592	Os03g0225900(AOS2);Os11g0210500(Adh2*);Os01g0348600(-);Os11g0210300(ADH1);Os05g0102000(OsJMT1);Os02g0218700(HPL2);Os01g0762000(OspPLAIValpha);Os02g0817700(OsI57);Os02g0274100(AIM1);Os09g0513100(-);Os06g0346300(-);Os11g0605500(ACX2);Os02g0110200(HPL3);Os08g0509100(OsLOX8);Os03g0810900(OspPLAIVbeta);Os04g0615100(-);Os05g0163700(OsACX4);Os06g0354500(ACX3);Os06g0216300(OsOPR1)	K01723+K18857+K10527+K18857+K08241+K01723+K14674+K07513+K10527+K22389+K00232+K00232+K10528+K00454+K14674+K22389+K00232+K00232+K05894
Metabolism	Amino acid metabolism	Valine, leucine and isoleucine degradation	17	52	0.000519621	0.00519621	ko00280	Os05g0565500(-);Os07g0675000(-);Os03g0310400(-);Os01g0110400(-);Os02g0817700(OsI57);Os05g0125500(-);Os02g0730000(OsALDH2a);Os12g0183100(-);Os07g0188800(OsALDH6B2);Os01g0269000(-);Os12g0264500(-);Os06g0270900(OsALDH2B1);Os09g0440300(ALDH7);Os01g0314100(-);Os02g0646500(OS-ALDH);Os03g0231600(-);Os05g0156700(-)	K00020+K00249+K01692+K00626+K07513+K00253+K00128+K00166+K00140+K01640+K05605+K00128+K14085+K09699+K00128+K00826+K00382
Metabolism	Biosynthesis of other secondary metabolites	Phenylpropanoid biosynthesis	57	266	0.000612865	0.00569089	ko00940	Os07g0677100(POX8.1);Os06g0306300(prx78);Os06g0274800(prx77);Os07g0676900(prx109);Os07g0115300(prx98);Os10g0194200(OsCAD1);Os06g0521500(prx83);Os02g0187800(GH2);Os01g0327100(prx15);Os04g0500700(OsHCT1);Os03g0762300(-);Os08g0441500(OsCCR);Os01g0591300(OsALDH2C1);Os10g0109300(PRX125);Os01g0326100(RP-2);Os02g0626400(OsPAL);Os04g0688300(prx61);Os01g0326300(-);Os01g0930800(Os1bglu5);Os02g0626100(OsPAL…	K00430+K00430+K00430+K00430+K00430+K00083+K00430+K00083+K00430+K13065+K00430+K09753+K12355+K00430+K00430+K10775+K00430+K00430+K01188+K13064+K00430+K00430+K00430+K00430+K01188+K01188+K00430+K00430+K01188+K00430+K01188+K01188+K00430+K00430+K00430+K00430+K00430+K00430+K05350+K05349+K01904+K00430+K05349+K00430+K00083+K01904+K09755+K01188+K00430+K01188+K01904+K23260+K13065+K01188+K09754+K05350+K12355
Metabolism	Global and overview maps	Carbon metabolism	63	307	0.00106249	0.00920828	ko01200	Os04g0486950(-);Os06g0486900(FDH2);Os01g0654500(-);Os06g0246500(-);Os12g0182200(-);Os08g0447000(-);Os08g0547100(-);Os03g0713000(-);Os06g0486800(OsFDH);Os12g0625000(rcs1);Os07g0529000(OsEnS-107);Os01g0760600(-);Os01g0110400(-);Os10g0405600(OsPFK10);Os12g0616900(-);Os01g0118000(-);Os04g0485300(OsG6PDH2);Os06g0548000(-);Os06g0149900(-);Os06g0256500(Pgi2(Pgib));Os06g0727200(CATB);Os04g0543900(OsGDH2)…	K01638+K00122+K00031+K00161+K00627+K00058+K01057+K01754+K00122+K01738+K01637+K14454+K00626+K00850+K00162+K01623+K00036+K14455+K01738+K01810+K03781+K00261+K00033+K00850+K15919+K19269+K00140+K00234+K01455+K00627+K00616+K00232+K01647+K01738+K00850+K01810+K11517+K00927+K00232+K01895+K01807+K05605+K00873+K00026+K00232+K00030+K00850+K03781+K00814+K00025+K02437+K01602+K00029+K00074+K00121+K00232+K00814+…
Metabolism	Amino acid metabolism	Phenylalanine, tyrosine and tryptophan biosynthesis	16	54	0.00242468	0.0197005	ko00400	Os02g0302700(OsNAAT2);Os06g0133900(EPSPS);Os01g0760600(-);Os06g0345200(OsNAAT4);Os09g0565700(EIP3);Os06g0548000(-);Os06g0632200(TS);Os11g0644800(-);Os02g0797500(AST);Os01g0871300(-);Os02g0302200(-);Os07g0182100(OsTSA);Os03g0718000(OASB2);Os08g0135900(TS);Os04g0463500(OASB1);MSTRG.24751(ADT3)	K00815+K00800+K14454+K00815+K05359+K14455+K06001+K00815+K00811+K15849+K00815+K01695+K01658+K01696+K01658+K05359
Metabolism	Lipid metabolism	Glycerolipid metabolism	24	95	0.00267581	0.0204621	ko00561	Os05g0387200(-);Os10g0492900(-);Os12g0100500(-);Os01g0762000(OspPLAIValpha);Os04g0647800(-);Os04g0634700(OsBIDK1);Os06g0563900(-);Os01g0847800(AKR3);Os02g0730000(OsALDH2a);Os01g0783200(-);Os01g0666000(-);Os11g0679700(OsGPAT3);Os12g0576900(-);Os03g0810900(OspPLAIVbeta);Os06g0270900(OsALDH2B1);Os09g0440300(ALDH7);Os11g0615000(-);Os11g0100600(-);Os05g0196800(OsDGAT);Os05g0462301(-);Os01g0693300(-);O…	K06118+K07407+K01054+K14674+K00864+K00901+K11155+K00002+K00128+K00901+K18693+K13508+K00901+K14674+K00128+K14085+K15728+K01054+K11155+K15728+K18693+K07407+K00128+K07407
Metabolism	Amino acid metabolism	Cysteine and methionine metabolism	30	129	0.0033533	0.0242183	ko00270	Os08g0342400(-);Os08g0447000(-);Os03g0161800(Sip2A);Os02g0302700(OsNAAT2);Os12g0625000(rcs1);Os01g0760600(-);Os09g0451000(ACO1);Os06g0345200(OsNAAT4);Os06g0548000(-);Os03g0727600(ACS1);Os11g0644800(-);Os10g0517500(RRJ1);Os06g0149900(-);Os11g0216900(OsIDI2);Os04g0669800(OsMTK);Os02g0797500(AST);Os02g0302200(-);Os03g0760700(-);Os03g0747800(RCS3);Os12g0528400(-);Os12g0632700(-);Os11g0484000(OsDEP);O…	K12524+K00058+K08967+K00815+K01738+K14454+K05933+K00815+K14455+K01762+K00815+K01761+K01738+K08963+K00899+K00811+K00815+K00133+K01738+K21456+K00026+K16054+K05933+K00025+K08967+K01762+K23977+K00789+K01919+K00826
Metabolism	Metabolism of other amino acids	Cyanoamino acid metabolism	18	67	0.0043724	0.0299164	ko00460	Os02g0635200(NIT1);Os04g0650700(OsASNase2);Os01g0930800(Os1bglu5);Os03g0212800(Os3bglu6);Os04g0474900(OsTAGG1);Os05g0366600(Os5bglu22);Os01g0813800(Os1bglu3);Os01g0764900(-);Os03g0749500(-);Os04g0513400(Os4bglu16);Os05g0449600(-);Os03g0749300(OsBGLU1);Os04g0474800(Os4bglu12);Os04g0174100(-);Os04g0171800(-);Os09g0511600(Os9bglu31);Os05g0365700(Os5bglu20);MSTRG.19312(BGLU15)	K13035+K13051+K01188+K01188+K01188+K01188+K01188+K01455+K01188+K05350+K05349+K05349+K01188+K12153+K12153+K01188+K01188+K05350
Metabolism	Metabolism of other amino acids	Glutathione metabolism	30	132	0.00480265	0.0312172	ko00480	Os11g0588300(OsGSTT1);Os01g0654500(-);Os03g0283100(OsGSTL2);Os02g0813500(OsGR2);Os10g0529500(OsGSTU30);Os04g0485300(OsG6PDH2);Os11g0484500(Os6PGDH2);Os01g0369700(OsGSTF5);Os08g0562700(-);Os01g0371200(OsGSTF1);Os03g0358100(OsGpx2);Os10g0529400(OsGSTU9);Os12g0434400(-);Os04g0556300(OsGpx1);Os12g0528400(-);Os10g0527800(OsGSTU12);Os10g0529700(OsGSTU8);Os01g0558100(OsGSTU6);Os10g0528200(GST);Os01g0764…	K00799+K00031+K00799+K00383+K00799+K00036+K00033+K00799+K01256+K00799+K00432+K00799+K01255+K00432+K21456+K00799+K00799+K00799+K00799+K00799+K00799+K00434+K00432+K00799+K00799+K00799+K00799+K01919+K00799+K00799
Metabolism	Biosynthesis of other secondary metabolites	Tropane, piperidine and pyridine alkaloid biosynthesis	11	35	0.00691522	0.0428085	ko00960	Os02g0302700(OsNAAT2);Os01g0760600(-);Os06g0345200(OsNAAT4);Os06g0338200(OsDAO1);Os06g0548000(-);Os11g0644800(-);Os02g0797500(AST);Os01g0871300(-);Os03g0269100(OsSAG13);Os02g0302200(-);Os06g0338700(-)	K00815+K14454+K00815+K00276+K14455+K00815+K00811+K15849+K08081+K00815+K00276
Metabolism	Amino acid metabolism	Tryptophan metabolism	20	81	0.00767361	0.0453441	ko00380	Os09g0528700(OsCYP76M7);Os04g0475600(-);Os03g0310400(-);Os01g0110400(-);Os09g0344500(ZRP4);Os06g0727200(CATB);Os02g0730000(OsALDH2a);Os04g0128900(YUCCA7);Os08g0140300(TDC1);Os04g0118100(OsAMI1);Os07g0437500(TDC2);Os01g0273800(OsYUCCA9);Os02g0592000(-);Os06g0270900(OsALDH2B1);Os09g0440300(ALDH7);Os02g0115700(CATA1);Os03g0790700(AO);Os08g0140500(OsTDC3);Os02g0646500(OS-ALDH);Os05g0156700(-)	K07408+K23947+K01692+K00626+K22588+K03781+K00128+K11816+K01593+K01426+K01593+K11816+K23947+K00128+K14085+K03781+K11817+K01593+K00128+K00382
Metabolism	Lipid metabolism	Biosynthesis of unsaturated fatty acids	12	41	0.0090945	0.0488846	ko01040	Os04g0271200(OsPAS2);Os07g0417200(OsFAD2-2);Os02g0817700(OsI57);Os06g0346300(-);Os04g0558400(-);Os04g0116600(-);Os11g0605500(ACX2);Os07g0416900(OsFAD2-3);Os06g0299100(-);Os05g0163700(OsACX4);Os06g0354500(ACX3);Os07g0416700(OsFAD2-4)	K10703+K10256+K07513+K00232+K01068+K10251+K00232+K10256+K10251+K00232+K00232+K10256
Metabolism	Carbohydrate metabolism	Glycolysis / Gluconeogenesis	34	161	0.00927127	0.0488846	ko00010	Os06g0246500(-);Os12g0182200(-);Os08g0345700(OsPFPA3);Os11g0210500(Adh2*);Os11g0210300(ADH1);Os10g0405600(OsPFK10);Os12g0616900(-);Os02g0714200(OsPFPA1);Os01g0118000(-);Os06g0256500(Pgi2(Pgib));Os06g0151900(OsPFK06);Os01g0847800(AKR3);Os02g0730000(OsALDH2a);Os03g0818100(-);Os04g0458600(-);Os08g0431300(-);Os11g0210600(Adh3);Os10g0159800(-);Os05g0194900(OsPPi-PFK);Os03g0776000(Pgi1(Pgia));Os06g0668…	K00161+K00627+K00895+K18857+K18857+K00850+K00162+K00895+K01623+K01810+K00850+K00002+K00128+K03103+K01785+K00627+K00001+K00001+K00850+K01810+K00927+K01568+K01895+K00873+K00128+K14085+K00850+K00121+K00134+K01689+K00128+K01785+K00382+K01568
Metabolism	Biosynthesis of other secondary metabolites	Indole alkaloid biosynthesis	3	4	0.0100844	0.0488846	ko00901	Os08g0140300(TDC1);Os07g0437500(TDC2);Os08g0140500(OsTDC3)	K01593+K01593+K01593
Metabolism	Carbohydrate metabolism	Galactose metabolism	17	67	0.010153	0.0488846	ko00052	Os07g0687900(wsi76);Os04g0664900(OsCIN5);Os02g0534400(OSCIN1);Os10g0492900(-);Os05g0539400(OsBgal9);Os10g0405600(OsPFK10);Os06g0151900(OsPFK06);Os04g0458600(-);Os05g0194900(OsPPi-PFK);Os09g0526700(OsUGE3);Os01g0191700(OsPFK01);Os09g0323000(OsUGE4);Os05g0595100(OsUGE1);Os07g0209100(-);Os10g0493600(alphaGa1);Os10g0155500(-);Os07g0679300(alpha-Gal)	K18819+K01193+K01193+K07407+K12309+K00850+K00850+K01785+K00850+K01784+K00850+K01784+K01784+K06617+K07407+K01785+K07407
Metabolism	Global and overview maps	2-Oxocarboxylic acid metabolism	17	67	0.010153	0.0488846	ko01210	Os01g0654500(-);Os01g0652600(-);Os01g0760600(-);Os04g0389800(-);Os06g0548000(-);Os02g0797500(AST);Os03g0760700(-);Os02g0608600(-);Os02g0194100(-);Os04g0479200(-);Os10g0390600(OsAlaAT4);Os05g0129100(-);Os10g0390500(ALAAT);Os04g0174100(-);Os02g0232400(-);Os04g0171800(-);Os03g0231600(-)	K00031+K00053+K14454+K01652+K14455+K00811+K00133+K01653+K01647+K00030+K00814+K00818+K00814+K12153+K01647+K12153+K00826
Cellular Processes	Transport and catabolism	Phagosome	21	93	0.0178934	0.0830763	ko04145	Os01g0282800(OsTUB1);Os01g0659200(v-ATP-E);Os06g0662000(PLS1);Os01g0254900(-);Os02g0178400(-);Os01g0227300(OsRab7B1);Os05g0516600(OsRab7B3);Os05g0180600(-);Os06g0568200(OsVHA-B);Os11g0169900(-);Os12g0168900(-);Os08g0254500(-);Os01g0834200(-);Os06g0234200(OsRAC4);Os12g0236700(-);Os05g0413200(TUB6);Os04g0601700(-);Os08g0428900(-);Os02g0742200(OsRac3);Os03g0105600(OsTUB2);Os08g0104700(-)	K07375+K02150+K02145+K08488+K07342+K07897+K07897+K00914+K02147+K02155+K02155+K10956+K02154+K04392+K00921+K07375+K02152+K00921+K04392+K07375+K00921
Metabolism	Biosynthesis of other secondary metabolites	Caffeine metabolism	2	2	0.0199772	0.0895528	ko00232	Os03g0429800(-);Os01g0865100(-)	K00106+K00365
Metabolism	Carbohydrate metabolism	Pyruvate metabolism	21	95	0.0224718	0.0973778	ko00620	Os04g0486950(-);Os06g0246500(-);Os12g0182200(-);Os10g0363300(ACC1);Os01g0110400(-);Os12g0616900(-);Os08g0191700(GLYI-11);Os02g0730000(OsALDH2a);Os03g0332400(GLYII-2);Os08g0431300(-);Os02g0525900(-);Os11g0216000(-);Os12g0632700(-);Os06g0270900(OsALDH2B1);Os09g0440300(ALDH7);Os04g0551200(-);Os01g0723400(NADP-ME2);Os03g0337900(-);Os05g0230900(OsGLYI7);Os02g0646500(OS-ALDH);Os05g0156700(-)	K01638+K00161+K00627+K11262+K00626+K00162+K01759+K00128+K01069+K00627+K01895+K00873+K00026+K00128+K14085+K00025+K00029+K01679+K01759+K00128+K00382
Metabolism	Glycan biosynthesis and metabolism	Glycosaminoglycan degradation	6	17	0.0242756	0.101801	ko00531	Os05g0539400(OsBgal9);Os01g0931100(-);Os11g0543500(-);Os06g0179000(-);Os12g0578400(-);Os07g0575500(-)	K12309+K10532+K10532+K07964+K07964+K12373
Metabolism	Metabolism of terpenoids and polyketides	Limonene and pinene degradation	4	9	0.0277328	0.111722	ko00903	Os03g0310400(-);Os02g0730000(OsALDH2a);Os06g0270900(OsALDH2B1);Os02g0646500(OS-ALDH)	K01692+K00128+K00128+K00128
Metabolism	Metabolism of cofactors and vitamins	Ubiquinone and other terpenoid-quinone biosynthesis	14	58	0.0283602	0.111722	ko00130	Os02g0302700(OsNAAT2);Os02g0276500(OsVTE1);Os06g0345200(OsNAAT4);Os11g0644800(-);Os03g0691400(-);Os08g0388900(-);Os09g0361500(ICS1);Os02g0302200(-);Os01g0784800(-);Os02g0581400(-);Os03g0152400(OsACS1);Os07g0280200(OsACS7);Os02g0168100(OsHPPD);Os02g0697400(4CL2)	K00815+K09834+K00815+K00815+K19222+K06125+K02552+K00815+K03809+K14759+K01904+K01904+K00457+K01904
Metabolism	Carbohydrate metabolism	Glyoxylate and dicarboxylate metabolism	20	92	0.0301425	0.115251	ko00630	Os04g0486950(-);Os06g0486900(FDH2);Os06g0486800(OsFDH);Os07g0529000(OsEnS-107);Os01g0110400(-);Os06g0727200(CATB);Os04g0106400(-);Os09g0261300(-);Os01g0764900(-);Os02g0194100(-);Os07g0616500(GLO5);Os02g0525900(-);Os12g0632700(-);Os02g0115700(CATA1);Os04g0551200(-);Os10g0516100(OsGDCH);Os12g0274700(RBCS);Os04g0107500(-);Os02g0232400(-);Os05g0156700(-)	K01638+K00122+K00122+K01637+K00626+K03781+K15919+K19269+K01455+K01647+K11517+K01895+K00026+K03781+K00025+K02437+K01602+K15919+K01647+K00382
Metabolism	Biosynthesis of other secondary metabolites	Betalain biosynthesis	3	6	0.0404354	0.142232	ko00965	Os08g0140300(TDC1);Os07g0437500(TDC2);Os08g0140500(OsTDC3)	K01593+K01593+K01593
Metabolism	Glycan biosynthesis and metabolism	Glycosphingolipid biosynthesis - globo and isoglobo series	4	10	0.0411556	0.142232	ko00603	Os10g0492900(-);Os07g0575500(-);Os10g0493600(alphaGa1);Os07g0679300(alpha-Gal)	K07407+K12373+K07407+K07407
Metabolism	Metabolism of terpenoids and polyketides	Monoterpenoid biosynthesis	4	10	0.0411556	0.142232	ko00902	Os02g0121700(OsTPS3);Os04g0531750(-);Os04g0531900(-);Os04g0532400(-)	K15086+K15095+K15095+K15095
Metabolism	Lipid metabolism	Arachidonic acid metabolism	6	19	0.0415756	0.142232	ko00590	Os03g0829100(-);Os01g0762000(OspPLAIValpha);Os03g0358100(OsGpx2);Os04g0556300(OsGpx1);Os03g0810900(OspPLAIVbeta);Os02g0664000(OsGpx3)	K08726+K14674+K00432+K00432+K14674+K00432
Metabolism	Carbohydrate metabolism	Pentose phosphate pathway	14	62	0.0476672	0.15658	ko00030	Os08g0345700(OsPFPA3);Os08g0547100(-);Os10g0405600(OsPFK10);Os02g0714200(OsPFPA1);Os01g0118000(-);Os04g0485300(OsG6PDH2);Os06g0256500(Pgi2(Pgib));Os11g0484500(Os6PGDH2);Os06g0151900(OsPFK06);Os01g0926300(-);Os05g0194900(OsPPi-PFK);Os03g0776000(Pgi1(Pgia));Os04g0306400(OsRPI);Os01g0191700(OsPFK01)	K00895+K01057+K00850+K00895+K01623+K00036+K01810+K00033+K00850+K00616+K00850+K01810+K01807+K00850
Metabolism	Global and overview maps	Biosynthesis of amino acids	48	269	0.0481784	0.15658	ko01230	Os08g0342400(-);Os01g0654500(-);Os08g0447000(-);Os02g0302700(OsNAAT2);Os03g0713000(-);Os01g0652600(-);Os06g0133900(EPSPS);Os12g0625000(rcs1);Os01g0760600(-);Os04g0389800(-);Os10g0405600(OsPFK10);Os06g0345200(OsNAAT4);Os09g0565700(EIP3);Os01g0118000(-);Os06g0548000(-);Os06g0632200(TS);Os11g0644800(-);Os06g0149900(-);Os02g0797500(AST);Os06g0151900(OsPFK06);Os01g0871300(-);Os04g0106300(OsARG);Os02g0…	K12524+K00031+K00058+K00815+K01754+K00053+K00800+K01738+K14454+K01652+K00850+K00815+K05359+K01623+K14455+K06001+K00815+K01738+K00811+K00850+K15849+K01476+K00815+K00616+K12657+K00133+K01695+K01653+K01658+K01647+K01738+K00850+K00927+K01807+K00873+K00030+K00850+K00814+K00818+K01696+K01658+K00814+K00134+K01647+K01689+K00789+K00826+K05359
Metabolism	Lipid metabolism	Sphingolipid metabolism	9	35	0.0498521	0.158067	ko00600	Os10g0492900(-);Os05g0539400(OsBgal9);Os02g0581300(-);Os02g0745700(-);Os01g0100900(SPL1);Os10g0493600(alphaGa1);Os02g0656200(OsCERK);Os07g0679300(alpha-Gal);MSTRG.7056(Os05g0567100)	K07407+K12309+K23727+K04713+K01634+K07407+K04715+K07407+K04718
Metabolism	Metabolism of cofactors and vitamins	Porphyrin and chlorophyll metabolism	12	52	0.0552669	0.171064	ko00860	Os10g0419600(OsCHL);Os01g0227100(NYC1);Os01g0949400(Se13);Os02g0168800(PBD);Os03g0654600(NOL);Os10g0389200(OsRCCR1);Os04g0678700(OsPorA);Os03g0146400(OsPAO);Os09g0532000(SGR);Os10g0389300(OsRCCR2);Os04g0320100(OsHCAR);Os03g0337600(UroD)	K08099+K13606+K08101+K01749+K13606+K13545+K00218+K13071+K22013+K13545+K18010+K01599
Metabolism	Carbohydrate metabolism	Butanoate metabolism	9	36	0.0584783	0.176795	ko00650	Os02g0112900(OsGABA-T);Os03g0310400(-);Os04g0389800(-);Os01g0110400(-);Os01g0269000(-);Os02g0608600(-);Os04g0614600(OSL2);Os01g0796400(-);Os03g0236200(OsGAD3)	K16871+K01692+K01652+K00626+K01640+K01653+K16871+K00074+K01580
Metabolism	Amino acid metabolism	Arginine and proline metabolism	15	70	0.0617911	0.182565	ko00330	Os05g0536400(-);Os01g0760600(-);Os06g0548000(-);Os10g0550900(OsProDH);Os02g0797500(AST);Os02g0730000(OsALDH2a);Os04g0106300(OsARG);Os04g0118100(OsAMI1);Os01g0848200(P5CS2);Os06g0270900(OsALDH2B1);Os09g0440300(ALDH7);Os02g0533900(OsCPA1);Os04g0671200(PAO4);Os02g0646500(OS-ALDH);Os03g0643300(OsOAT)	K00294+K14454+K14455+K00318+K00811+K00128+K01476+K01426+K12657+K00128+K14085+K12251+K17839+K00128+K00819
Metabolism	Amino acid metabolism	Alanine, aspartate and glutamate metabolism	13	59	0.0651973	0.188348	ko00250	Os02g0112900(OsGABA-T);Os05g0536400(-);Os01g0760600(-);Os04g0650700(OsASNase2);Os06g0548000(-);Os04g0543900(OsGDH2);Os02g0797500(AST);Os08g0248800(-);Os04g0614600(OSL2);Os10g0390600(OsAlaAT4);Os10g0390500(ALAAT);Os05g0430800(-);Os03g0236200(OsGAD3)	K16871+K00294+K14454+K13051+K14455+K00261+K00811+K00609+K16871+K00814+K00814+K00764+K01580
Metabolism	Energy metabolism	Photosynthesis - antenna proteins	5	17	0.0803227	0.223941	ko00196	Os08g0435900(cab);Os04g0457000(CP24);Os07g0558400(CP29);Os01g0720500(Lhcb1.1);Os06g0320500(-)	K08910+K08917+K08915+K08912+K08907
Metabolism	Carbohydrate metabolism	Citrate cycle (TCA cycle)	13	61	0.0813054	0.223941	ko00020	Os01g0654500(-);Os06g0246500(-);Os12g0182200(-);Os12g0616900(-);Os07g0134800(SDH1);Os08g0431300(-);Os02g0194100(-);Os12g0632700(-);Os04g0479200(-);Os04g0551200(-);Os03g0337900(-);Os02g0232400(-);Os05g0156700(-)	K00031+K00161+K00627+K00162+K00234+K00627+K01647+K00026+K00030+K00025+K01679+K01647+K00382
Metabolism	Nucleotide metabolism	Pyrimidine metabolism	14	67	0.0826859	0.223941	ko00240	Os11g0125900(-);Os02g0736400(OsDHODH1);Os10g0563700(-);Os09g0567900(-);Os07g0213500(-);Os01g0935600(-);Os12g0123500(-);Os01g0807900(-);Os08g0248800(-);Os07g0492000(OsNDPK1);Os01g0712700(-);Os05g0573300(-);Os08g0557900(-);Os08g0530000(-)	K14641+K00207+K00940+K01240+K01520+K00943+K14641+K01464+K00609+K00940+K01489+K01937+K01240+K00876
Metabolism	Lipid metabolism	Glycerophospholipid metabolism	24	128	0.0865055	0.229504	ko00564	Os03g0826600(NPC1);Os02g0514500(-);Os10g0327300(-);Os01g0762000(OspPLAIValpha);Os04g0634700(OsBIDK1);Os09g0513100(-);Os01g0783200(-);Os01g0666000(-);Os01g0763600(-);Os11g0679700(OsGPAT3);Os01g0172400(OsPLDalpha1);Os12g0576900(-);Os11g0123400(-);Os03g0810900(OspPLAIVbeta);Os04g0615100(-);Os06g0604200(OsPLDalpha4);Os03g0852800(OsNPC3);Os11g0615000(-);Os02g0123600(-);Os05g0462301(-);Os01g0693300(-);…	K01114+K18696+K00981+K14674+K00901+K22389+K00901+K18693+K01126+K13508+K01115+K00901+K00967+K14674+K22389+K01115+K01114+K15728+K00999+K15728+K18693+K01126+K01517+K00111
Metabolism	Glycan biosynthesis and metabolism	Various types of N-glycan biosynthesis	8	34	0.0970844	0.252419	ko00513	Os04g0544900(-);Os08g0472600(OsFUT11);Os12g0170600(-);Os05g0519900(-);Os06g0229200(-);Os06g0245700(-);Os02g0577300(-);Os07g0575500(-)	K03847+K00753+K14412+K07151+K14413+K01231+K14413+K12373
Metabolism	Metabolism of cofactors and vitamins	Pantothenate and CoA biosynthesis	8	35	0.111079	0.283143	ko00770	Os01g0225400(-);Os01g0652600(-);Os02g0736400(OsDHODH1);Os04g0389800(-);Os01g0807900(-);Os02g0608600(-);Os06g0207000(-);Os03g0231600(-)	K00606+K00053+K00207+K01652+K01464+K01653+K09680+K00826
Metabolism	Carbohydrate metabolism	Inositol phosphate metabolism	15	77	0.119508	0.298603	ko00562	Os03g0826600(NPC1);Os12g0562400(OsPLC3);Os08g0556700(-);Os05g0180600(-);Os03g0818100(-);Os02g0554300(-);Os07g0188800(OsALDH6B2);Os06g0195600(-);Os12g0236700(-);Os03g0852800(OsNPC3);Os02g0123600(-);Os02g0466400(OsITPK4);Os08g0428900(-);Os09g0518700(OsITPK6);Os08g0104700(-)	K01114+K05857+K18081+K00914+K03103+K21797+K00140+K22913+K00921+K01114+K00999+K00913+K00921+K01765+K00921
Metabolism	Carbohydrate metabolism	Starch and sucrose metabolism	34	197	0.121738	0.298603	ko00500	Os06g0726400(SBE1);Os04g0664900(OsCIN5);Os02g0534400(OSCIN1);Os06g0367100(-);Os08g0520900(OsPHS8);Os01g0930800(Os1bglu5);Os01g0715400(OsSTA30);Os03g0340500(SUS4);Os06g0256500(Pgi2(Pgib));Os03g0212800(Os3bglu6);Os03g0758100(Pho1);Os01g0851700(Pho2);Os04g0474900(OsTAGG1);Os04g0309600(SUS5);Os05g0366600(Os5bglu22);Os01g0813800(Os1bglu3);Os03g0749500(-);Os03g0374600(-);Os02g0831500(SUS6);Os03g0776000…	K00700+K01193+K01193+K00700+K01214+K01188+K01176+K00695+K01810+K01188+K00688+K00688+K01188+K00695+K01188+K01188+K01188+K19892+K00695+K01810+K00696+K01194+K05350+K00695+K05349+K16055+K05349+K01188+K00975+K07024+K01188+K01188+K05350+K16055
Environmental Information Processing	Signal transduction	Phosphatidylinositol signaling system	16	85	0.138503	0.324169	ko04070	Os03g0310800(-);Os12g0562400(OsPLC3);Os10g0327300(-);Os08g0556700(-);Os04g0634700(OsBIDK1);Os05g0491100(CALa*);Os05g0180600(-);Os02g0554300(-);Os01g0783200(-);Os12g0236700(-);Os12g0576900(-);Os02g0123600(-);Os02g0466400(OsITPK4);Os08g0428900(-);Os01g0279300(OsCaM3);Os08g0104700(-)	K02183+K05857+K00981+K18081+K00901+K02183+K00914+K21797+K00901+K00921+K00901+K00999+K00913+K00921+K02183+K00921
Metabolism	Lipid metabolism	Linoleic acid metabolism	5	20	0.141545	0.324169	ko00591	Os03g0738600(LOX-L2);Os01g0762000(OspPLAIValpha);Os08g0509100(OsLOX8);Os03g0810900(OspPLAIVbeta);Os03g0700700(OsLOX1)	K15718+K14674+K00454+K14674+K15718
Metabolism	Metabolism of terpenoids and polyketides	Sesquiterpenoid and triterpenoid biosynthesis	5	20	0.141545	0.324169	ko00909	Os03g0347900(-);Os03g0184550(-);Os04g0344100(-);Os07g0200700(-);MSTRG.18365(TPS7)	K15803+K15891+K15803+K00801+K15803
Metabolism	Amino acid metabolism	Arginine biosynthesis	8	37	0.142135	0.324169	ko00220	Os01g0760600(-);Os06g0548000(-);Os04g0543900(OsGDH2);Os02g0797500(AST);Os04g0106300(OsARG);Os10g0390600(OsAlaAT4);Os05g0129100(-);Os10g0390500(ALAAT)	K14454+K14455+K00261+K00811+K01476+K00814+K00818+K00814
Environmental Information Processing	Signal transduction	Plant hormone signal transduction	46	280	0.149879	0.335935	ko04075	Os04g0653000(EG2);Os06g0714300(OsSAUR29);Os07g0592600(GH3-8);Os03g0297600(OsPYL/RCAR4);Os04g0432000(SAPK7);Os09g0325700(PP2C1);Os01g0764800(GH3-2);Os01g0846300(OsPP15);Os06g0183100(ORR2);Os01g0808100(OsbZIP08);Os01g0382400(OsPR1#012);Os12g0601400(OsIAA3);Os05g0150500(TIR1);Os01g0279900(OsbZIP03);Os02g0182100(RR24);Os01g0382000(OsPR1b);Os05g0457200(OsPP2C49);Os03g0268600(OsPP2C30);Os02g0769100(OsS…	K13464+K14488+K14487+K14496+K14498+K14497+K14487+K14497+K14491+K14431+K13449+K14484+K14485+K14431+K14491+K13449+K14497+K14497+K14488+K14490+K13946+K14489+K14431+K13422+K13449+K14484+K13449+K14484+K14502+K14498+K13946+K14500+K14490+K13449+K14486+K14497+K13463+K14491+K14497+K14431+K14431+K14432+K12126+K14496+K13463+K14431
Metabolism	Biosynthesis of other secondary metabolites	Glucosinolate biosynthesis	3	10	0.157862	0.347832	ko00966	Os04g0174100(-);Os04g0171800(-);Os03g0231600(-)	K12153+K12153+K00826
Environmental Information Processing	Signal transduction	MAPK signaling pathway - plant	35	212	0.180901	0.391952	ko04016	Os05g0539800(OsRTH2);Os04g0556000(HMA5);Os06g0665800(HMA9);Os04g0618700(Os-FLS2);Os03g0310800(-);Os03g0297600(OsPYL/RCAR4);Os10g0563700(-);Os04g0432000(SAPK7);Os09g0325700(PP2C1);Os08g0453700(RbohF);Os01g0846300(OsPP15);Os01g0382400(OsPR1#012);Os02g0322400(-);Os02g0135200(OsMPK13);Os01g0382000(OsPR1b);Os05g0457200(OsPP2C49);Os05g0491100(CALa*);Os03g0268600(OsPP2C30);Os06g0727200(CATB);Os01g064380…	K20726+K17686+K17686+K13420+K02183+K14496+K00940+K14498+K14497+K13447+K14497+K13449+K20716+K20538+K13449+K14497+K02183+K14497+K03781+K20538+K20547+K13422+K13449+K20717+K20535+K13449+K14498+K00940+K03781+K13449+K14497+K02183+K14497+K14496+K20725
Metabolism	Lipid metabolism	Fatty acid biosynthesis	10	52	0.191612	0.408353	ko00061	Os07g0616200(-);Os10g0363300(ACC1);Os08g0225000(ZL16);Os04g0376300(-);Os05g0317200(LACS8);Os01g0681200(-);Os11g0147000(-);Os01g0655800(-);Os03g0297400(-);Os10g0456100(-)	K09458+K11262+K02372+K00059+K01897+K01897+K01897+K01897+K00645+K00059
Metabolism	Amino acid metabolism	Glycine, serine and threonine metabolism	15	84	0.200721	0.41986	ko00260	Os08g0342400(-);Os08g0447000(-);Os03g0713000(-);Os06g0338200(OsDAO1);Os06g0632200(TS);Os04g0106400(-);Os03g0760700(-);Os07g0182100(OsTSA);Os04g0464200(BAD1);Os09g0440300(ALDH7);Os10g0516100(OsGDCH);Os08g0135900(TS);Os06g0338700(-);Os04g0107500(-);Os05g0156700(-)	K12524+K00058+K01754+K00276+K06001+K15919+K00133+K01695+K00130+K14085+K02437+K01696+K00276+K15919+K00382
Metabolism	Glycan biosynthesis and metabolism	Glycosphingolipid biosynthesis - ganglio series	2	6	0.203471	0.41986	ko00604	Os05g0539400(OsBgal9);Os07g0575500(-)	K12309+K12373
Metabolism	Metabolism of cofactors and vitamins	Thiamine metabolism	5	23	0.217401	0.44127	ko00730	Os03g0306900(-);Os07g0529600(OsDR8);Os12g0236400(ADK-A);Os05g0408900(CLA1);Os07g0190000(OsDXS)	K20896+K03146+K00939+K01662+K01662
Metabolism	Metabolism of terpenoids and polyketides	Terpenoid backbone biosynthesis	11	60	0.220635	0.44127	ko00900	Os01g0857200(-);Os01g0802100(OsIspE);Os01g0110400(-);Os03g0197000(-);Os03g0184550(-);Os02g0680600(OsIspF);Os07g0580900(OsGGPPS1);Os01g0832000(CDS5);Os09g0492700(HMGR);Os05g0408900(CLA1);Os07g0190000(OsDXS)	K11778+K00919+K00626+K11778+K15891+K01770+K13789+K15892+K00021+K01662+K01662
Metabolism	Carbohydrate metabolism	Fructose and mannose metabolism	13	73	0.225371	0.443912	ko00051	Os08g0345700(OsPFPA3);Os03g0828300(-);Os03g0294200(OsF2KP2);Os10g0405600(OsPFK10);Os02g0714200(OsPFPA1);Os03g0115100(-);Os01g0118000(-);Os06g0151900(OsPFK06);Os05g0194900(OsPPi-PFK);Os01g0191700(OsPFK01);Os08g0545200(OsDH1);Os07g0669100(OsXYLA1);Os11g0600900(-)	K00895+K19355+K01103+K00850+K00895+K05305+K01623+K00850+K00850+K00850+K00008+K01805+K01809
Metabolism	Amino acid metabolism	Valine, leucine and isoleucine biosynthesis	5	24	0.24507	0.475509	ko00290	Os03g0713000(-);Os01g0652600(-);Os04g0389800(-);Os02g0608600(-);Os03g0231600(-)	K01754+K00053+K01652+K01653+K00826
Metabolism	Biosynthesis of other secondary metabolites	Anthocyanin biosynthesis	1	2	0.262851	0.50251	ko00942	Os07g0148200(-)	K12930
Metabolism	Amino acid metabolism	Lysine degradation	9	50	0.269581	0.507906	ko00310	Os03g0310400(-);Os01g0110400(-);Os02g0730000(OsALDH2a);Os03g0307800(IEZ1);Os02g0783700(-);Os06g0270900(OsALDH2B1);Os09g0440300(ALDH7);Os02g0646500(OS-ALDH);Os05g0156700(-)	K01692+K00626+K00128+K11430+K14157+K00128+K14085+K00128+K00382
Metabolism	Metabolism of terpenoids and polyketides	Carotenoid biosynthesis	7	38	0.285816	0.530516	ko00906	Os10g0546600(CYP97C2);Os02g0704000(OsNCED1);Os10g0533500(OsBCH3);Os07g0154100(OSNCED3);Os04g0578400(OsBCH2);Os08g0472800(OsABA8OX2);Os03g0645900(OsNCED1)	K09837+K09840+K15746+K09840+K15746+K09843+K09840
Environmental Information Processing	Membrane transport	ABC transporters	9	51	0.289743	0.530516	ko02010	Os04g0209300(OsABCC10);Os03g0280000(OsABCB13);Os04g0209200(OsABCC9);Os02g0190300(OsABCB9);Os01g0356400(OsABCC8);Os05g0137100(-);Os03g0142800(OsABCC13);Os06g0184766(-);Os05g0137200(OsABCB17)	K05665+K05658+K05665+K05658+K05665+K05658+K05665+K05674+K05658
Metabolism	Lipid metabolism	Steroid biosynthesis	8	45	0.299368	0.540526	ko00100	Os02g0323600(OsCYP51H4);Os01g0103600(-);Os01g0762000(OspPLAIValpha);Os01g0211600(-);Os01g0134500(OsSTE1);Os03g0810900(OspPLAIVbeta);Os07g0200700(-);Os09g0103100(-)	K05917+K01824+K14674+K09832+K00227+K14674+K00801+K01052
Metabolism	Lipid metabolism	Ether lipid metabolism	6	33	0.320582	0.570899	ko00565	Os03g0826600(NPC1);Os01g0762000(OspPLAIValpha);Os01g0172400(OsPLDalpha1);Os03g0810900(OspPLAIVbeta);Os06g0604200(OsPLDalpha4);Os03g0852800(OsNPC3)	K01114+K14674+K01115+K14674+K01115+K01114
Metabolism	Nucleotide metabolism	Purine metabolism	17	107	0.340714	0.598551	ko00230	Os07g0613000(-);Os03g0429800(-);Os11g0125900(-);Os10g0563700(-);Os09g0442600(-);Os05g0161500(-);Os12g0123500(-);Os01g0865100(-);Os11g0216000(-);Os07g0492000(OsNDPK1);Os12g0597500(OsUAH);Os12g0236400(ADK-A);Os05g0430800(-);Os04g0518000(-);Os08g0557200(-);Os03g0390700(-);Os07g0693500(-)	K00951+K00106+K14641+K00940+K00951+K00951+K14641+K00365+K00873+K00940+K18151+K00939+K00764+K00856+K01517+K13484+K01490
Metabolism	Metabolism of cofactors and vitamins	Folate biosynthesis	6	34	0.347211	0.601832	ko00790	Os01g0238500(-);Os02g0273100(-);Os02g0592200(-);Os05g0517500(-);Os05g0244700(OsAT-IV);Os08g0556200(-)	K18482+K18482+K01113+K01307+K18482+K01633
Metabolism	Carbohydrate metabolism	Amino sugar and nucleotide sugar metabolism	27	176	0.353717	0.605042	ko00520	Os05g0387200(-);Os02g0791500(OsUGlcAE3);Os01g0860400(-);Os08g0518900(C10122);Os05g0247100(DIP3);Os11g0700900(C10923);Os03g0115100(-);Os03g0320100(-);Os06g0256500(Pgi2(Pgib));Os06g0726200(Cht1*(Chi1));Os04g0636100(-);Os04g0618200(-);Os12g0555600(ND1);Os11g0132600(OsWD40-181);Os11g0131900(OsARAF3);Os03g0776000(Pgi1(Pgia));Os04g0640700(-);Os06g0185400(-);Os09g0526700(OsUGE3);Os02g0141300(CAP1);Os09g…	K06118+K08679+K01183+K01183+K01183+K01183+K05305+K01209+K01810+K20547+K13648+K12448+K00770+K01209+K01209+K01810+K15920+K13379+K01784+K12446+K13648+K01784+K12373+K01784+K00975+K08678+K01809
Metabolism	Biosynthesis of other secondary metabolites	Aflatoxin biosynthesis	1	3	0.36713	0.609936	ko00254	Os10g0363300(ACC1)	K11262
Metabolism	Biosynthesis of other secondary metabolites	Benzoxazinoid biosynthesis	1	3	0.36713	0.609936	ko00402	Os03g0797400(OsIGL)	K13222
Metabolism	Lipid metabolism	Synthesis and degradation of ketone bodies	2	9	0.370653	0.609936	ko00072	Os01g0110400(-);Os01g0269000(-)	K00626+K01640
Metabolism	Metabolism of cofactors and vitamins	Biotin metabolism	4	22	0.379181	0.616169	ko00780	Os07g0616200(-);Os08g0225000(ZL16);Os04g0376300(-);Os10g0456100(-)	K09458+K02372+K00059+K00059
Metabolism	Carbohydrate metabolism	Ascorbate and aldarate metabolism	10	63	0.399229	0.640738	ko00053	Os12g0612100(-);Os08g0114300(-);Os02g0730000(OsALDH2a);Os12g0482700(-);Os08g0557600(OsMDAR4);Os08g0151800(OsMDAR5);Os06g0270900(OsALDH2B1);Os09g0440300(ALDH7);Os04g0434800(OsAPx7);Os02g0646500(OS-ALDH)	K14190+K00103+K00128+K17744+K08232+K08232+K00128+K14085+K00434+K00128
Metabolism	Amino acid metabolism	Histidine metabolism	4	23	0.41324	0.655137	ko00340	Os02g0730000(OsALDH2a);Os06g0270900(OsALDH2B1);Os09g0440300(ALDH7);Os02g0646500(OS-ALDH)	K00128+K00128+K14085+K00128
Metabolism	Carbohydrate metabolism	C5-Branched dibasic acid metabolism	2	10	0.423851	0.663863	ko00660	Os04g0389800(-);Os02g0608600(-)	K01652+K01653
Metabolism	Biosynthesis of other secondary metabolites	Flavone and flavonol biosynthesis	2	11	0.474607	0.726448	ko00944	Os11g0457300(UGT);Os01g0176200(-)	K22772+K22771
Metabolism	Glycan biosynthesis and metabolism	Other glycan degradation	3	18	0.478484	0.726448	ko00511	Os05g0539400(OsBgal9);Os10g0140200(-);Os07g0575500(-)	K12309+K01191+K12373
Metabolism	Energy metabolism	Nitrogen metabolism	6	39	0.480573	0.726448	ko00910	Os01g0547600(NRT2.4);Os04g0543900(OsGDH2);Os01g0764900(-);Os02g0770800(OsNIA1);Os01g0704100(NRT2.3);Os01g0639900(BETACA1)	K02575+K00261+K01455+K10534+K02575+K01673
Metabolism	Metabolism of terpenoids and polyketides	Brassinosteroid biosynthesis	4	26	0.512088	0.765189	ko00905	Os02g0204700(OsCYP734A2);Os12g0139300(OsCPD2);Os06g0600400(OsCYP734A4);Os07g0136800(-)	K15639+K09588+K15639+K09589
Metabolism	Biosynthesis of other secondary metabolites	Flavonoid biosynthesis	9	62	0.521786	0.77082	ko00941	Os05g0526900(OsUGT706D2);Os04g0500700(OsHCT1);Os10g0116400(-);Os01g0697100(-);Os05g0527000(OsUGT706C3);Os04g0103900(CHS);Os04g0101400(CYP93G1);Os04g0664600(-);Os10g0196000(-)	K22845+K13065+K22845+K22845+K22845+K00660+K23180+K13065+K09754
Metabolism	Biosynthesis of other secondary metabolites	Monobactam biosynthesis	2	13	0.567453	0.828863	ko00261	Os08g0342400(-);Os03g0760700(-)	K12524+K00133
Organismal Systems	Environmental adaptation	Circadian rhythm - plant	7	51	0.595594	0.860302	ko04712	Os03g0309200(PHYB);Os11g0547000(FKF1);Os03g0719800(PHYA);Os03g0762000(HD6);Os01g0182600(GI);Os04g0103900(CHS);Os01g0286100(PIL15)	K12121+K12116+K12120+K03097+K12124+K00660+K12126
Metabolism	Metabolism of cofactors and vitamins	Vitamin B6 metabolism	2	14	0.609222	0.870317	ko00750	Os10g0517400(-);Os12g0600400(-)	K05275+K00868
Genetic Information Processing	Folding, sorting and degradation	Protein export	8	61	0.647472	0.889666	ko03060	Os05g0509500(-);Os06g0342100(SRP19);Os02g0178400(-);Os03g0844700(-);Os03g0147900(-);Os08g0254500(-);Os02g0435000(OsNSCC2);Os01g0772800(-)	K03106+K03105+K07342+K03217+K09648+K10956+K12275+K03106
Metabolism	Amino acid metabolism	Lysine biosynthesis	2	15	0.647844	0.889666	ko00300	Os08g0342400(-);Os03g0760700(-)	K12524+K00133
Metabolism	Lipid metabolism	Fatty acid elongation	6	46	0.649339	0.889666	ko00062	Os04g0271200(OsPAS2);Os04g0558400(-);Os04g0116600(-);Os06g0299100(-);Os03g0382100(-);MSTRG.4776(KCS1)	K10703+K01068+K10251+K10251+K15397+K15397
Metabolism	Metabolism of cofactors and vitamins	Nicotinate and nicotinamide metabolism	3	23	0.651008	0.889666	ko00760	Os09g0567900(-);Os07g0634400(-);Os08g0557900(-)	K01240+K18551+K01240
Metabolism	Energy metabolism	Oxidative phosphorylation	24	180	0.656984	0.889666	ko00190	Os01g0659200(v-ATP-E);Os06g0662000(PLS1);Os06g0568200(OsVHA-B);Os11g0169900(-);Os12g0168900(-);Os07g0134800(SDH1);Os01g0834200(-);Os08g0246400(-);Os04g0601700(-);gene-ndhD(-);gene-ndhE(-);gene-ndhG(-);gene-nad6(-);gene-cox2(-);gene-nad9(-);gene-atp6(-);gene-nad3(-);gene-nad4(-);MSTRG.11456(ndhH);MSTRG.30597(COX1);MSTRG.30605(ATPA);MSTRG.32226(NAD9);MSTRG.5087(ndhF);MSTRG.9497(ndhF)	K02150+K02145+K02147+K02155+K02155+K00234+K02154+K00417+K02152+K05575+K05576+K05578+K03884+K02261+K03936+K02126+K03880+K03881+K05579+K02256+K02132+K03936+K05577+K05577
Metabolism	Energy metabolism	Photosynthesis	12	92	0.665202	0.891508	ko00195	Os04g0473150(-);Os07g0147500(PsbR);Os10g0461100(-);Os02g0578400(-);Os03g0784700(FNR);Os01g0860601(-);Os06g0101600(OsPC);Os05g0508900(-);Os04g0414700(-);Os03g0835900(OsFd3);Os07g0147550(OsPsbR2);Os07g0147900(-)	K02703+K03541+K02717+K08901+K02641+K02639+K02638+K02721+K14332+K02639+K03541+K02641
Metabolism	Energy metabolism	Carbon fixation in photosynthetic organisms	12	93	0.680185	0.900928	ko00710	Os01g0760600(-);Os01g0118000(-);Os06g0548000(-);Os06g0668200(PGK);Os04g0306400(OsRPI);Os12g0632700(-);Os10g0390600(OsAlaAT4);Os04g0551200(-);Os12g0274700(RBCS);Os01g0723400(NADP-ME2);Os10g0390500(ALAAT);Os08g0126300(OsGapC3)	K14454+K01623+K14455+K00927+K01807+K00026+K00814+K00025+K01602+K00029+K00814+K00134
Metabolism	Energy metabolism	Sulfur metabolism	5	40	0.686091	0.900928	ko00920	Os12g0625000(rcs1);Os01g0667200(GLYII-1);Os06g0149900(-);Os03g0747800(RCS3);Os07g0558300(-)	K01738+K17725+K01738+K01738+K01082
Metabolism	Metabolism of terpenoids and polyketides	Zeatin biosynthesis	5	42	0.727879	0.93726	ko00908	Os10g0483500(OsCKX3);Os04g0556400(-);Os05g0311801(-);Os02g0206100(-);Os08g0460600(OsCKX11)	K00279+K13495+K10760+K13496+K00279
Genetic Information Processing	Folding, sorting and degradation	Ubiquitin mediated proteolysis	20	158	0.739877	0.93726	ko04120	Os09g0252800(-);Os05g0232500(OsUBC43);Os05g0425700(OsFbox258);Os05g0460200(OsUBC12);Os05g0557700(LTN1);Os01g0233900(OsUBC37);Os04g0643000(OsCUL3b);Os09g0252700(-);Os02g0293400(SIP14);Os03g0348900(OsSRFP1);Os09g0484300(-);Os05g0579800(APC10);Os05g0149900(APC7);Os01g0369000(OsCUL1-1);Os03g0683866(-);Os12g0105975(-);Os11g0106400(-);Os06g0164000(-);Os02g0261100(UBC5B);Os06g0301000(OsHrd1)	K10592+K10581+K03875+K10575+K10581+K10581+K03869+K10592+K04506+K10144+K10591+K03357+K03354+K03347+K10588+K03178+K03178+K04706+K06689+K10601
Metabolism	Metabolism of other amino acids	Taurine and hypotaurine metabolism	1	9	0.746713	0.93726	ko00430	Os03g0236200(OsGAD3)	K01580
Metabolism	Metabolism of other amino acids	Phosphonate and phosphinate metabolism	1	9	0.746713	0.93726	ko00440	Os11g0123400(-)	K00967
Metabolism	Lipid metabolism	Cutin, suberine and wax biosynthesis	4	35	0.749808	0.93726	ko00073	Os02g0734400(-);Os02g0621300(OsCER1);Os08g0557800(-);Os04g0511200(EFA27)	K17991+K15404+K13356+K17991
Metabolism	Biosynthesis of other secondary metabolites	Stilbenoid, diarylheptanoid and gingerol biosynthesis	3	28	0.778645	0.964037	ko00945	Os04g0500700(OsHCT1);Os04g0664600(-);Os10g0196000(-)	K13065+K13065+K09754
Metabolism	Glycan biosynthesis and metabolism	Other types of O-glycan biosynthesis	1	11	0.813385	0.997548	ko00514	Os08g0559300(SPY)	K09667
Metabolism	Metabolism of other amino acids	Selenocompound metabolism	2	22	0.839007	1	ko00450	Os10g0517500(RRJ1);Os05g0105000(-)	K01761+K08247
Metabolism	Glycan biosynthesis and metabolism	N-Glycan biosynthesis	4	43	0.876239	1	ko00510	Os04g0576800(-);Os04g0544900(-);Os05g0519900(-);Os06g0245700(-)	K12345+K03847+K07151+K01231
Cellular Processes	Transport and catabolism	Autophagy - other eukaryotes	4	43	0.876239	1	ko04136	Os05g0180600(-);Os07g0512200(Atg8);Os03g0644000(ATG6B);Os11g0100100(OsATG8e)	K00914+K08341+K08334+K08341
Organismal Systems	Environmental adaptation	Plant-pathogen interaction	35	292	0.880702	1	ko04626	Os01g0505600(OsCML11);Os01g0622600(OsCDPK1);Os07g0186500(-);Os04g0618700(Os-FLS2);Os03g0310800(-);Os08g0453700(RbohF);Os01g0382400(OsPR1#012);Os04g0647800(-);Os01g0382000(OsPR1b);Os05g0491100(CALa*);Os12g0137100(OsCBP);Os09g0511000(OsLysM-RLK10);Os01g0955100(OsCML31);Os08g0558100(-);Os04g0514600(-);Os07g0129200(PR1A);Os11g0559200(Xa21*);Os03g0808600(OsCDPK8);Os11g0569600(-);Os07g0127600(OsPR1#073…	K13448+K13412+K13457+K13420+K02183+K13447+K13449+K00864+K13449+K02183+K13448+K13429+K13448+K13448+K13459+K13449+K13437+K13412+K13437+K13449+K13457+K13457+K15397+K13457+K13448+K13456+K13449+K18835+K02183+K13448+K01373+K13457+K05391+K13448+K15397
Genetic Information Processing	Folding, sorting and degradation	SNARE interactions in vesicular transport	4	44	0.887313	1	ko04130	Os08g0277900(-);Os01g0254900(-);Os09g0272500(-);Os02g0658900(-)	K08503+K08488+K08507+K08497
Cellular Processes	Transport and catabolism	Endocytosis	19	172	0.905514	1	ko04144	Os02g0235000(-);Os03g0843100(OsRab11A1);Os01g0862300(-);Os01g0738600(-);Os09g0327100(OsRab11C2);Os01g0227300(OsRab7B1);Os05g0516600(OsRab7B3);Os02g0806600(-);Os01g0840100(OsMed37_1);Os05g0461300(OsRab8A2);Os07g0563800(-);Os04g0398800(-);Os01g0172400(OsPLDalpha1);Os09g0484300(-);Os06g0604200(OsPLDalpha4);Os08g0175200(-);Os02g0690700(-);Os05g0460000(OsctHSP70-1);Os03g0277300(HSP70)	K05756+K07904+K17917+K12471+K07904+K07897+K07897+K12471+K03283+K07901+K12486+K18464+K01115+K10591+K01115+K19476+K11826+K03283+K03283
Metabolism	Glycan biosynthesis and metabolism	Glycosylphosphatidylinositol(GPI)-anchor biosynthesis	2	28	0.921958	1	ko00563	Os01g0580100(-);Os01g0939000(-)	K05286+K11001
Genetic Information Processing	Translation	mRNA surveillance pathway	12	124	0.948123	1	ko03015	Os01g0178400(-);Os09g0279500(-);Os10g0470900(RBPJ);Os01g0349400(OsPP5);Os05g0373900(-);Os02g0191700(-);Os02g0780600(-);Os03g0268000(OsPP1);Os04g0504800(OsPABPC3);Os01g0600200(-);Os08g0305300(-);Os07g0495900(-)	K11584+K13126+K14411+K06269+K03265+K11583+K00565+K06269+K13126+K04354+K14409+K14326
Metabolism	Carbohydrate metabolism	Pentose and glucuronate interconversions	7	82	0.956144	1	ko00040	Os01g0847800(AKR3);Os04g0137201(OsPLL4.2);Os05g0361500(OsPME17);Os01g0788400(OsPME6);Os07g0640200(-);Os08g0545200(OsDH1);Os07g0669100(OsXYLA1)	K00002+K01728+K01051+K01051+K00854+K00008+K01805
Genetic Information Processing	Folding, sorting and degradation	RNA degradation	12	128	0.960938	1	ko03018	Os10g0405600(OsPFK10);Os09g0279500(-);Os06g0151900(OsPFK06);Os11g0102800(OsRINGC2-1);Os02g0517300(-);Os05g0194900(OsPPi-PFK);Os04g0504800(OsPABPC3);Os01g0191700(OsPFK01);Os10g0471350(-);Os08g0440300(OsCAF1A);Os03g0248600(OsEno2);Os03g0652100(-)	K00850+K13126+K00850+K10643+K12617+K00850+K13126+K00850+K14442+K12581+K01689+K12580
Genetic Information Processing	Replication and repair	DNA replication	4	71	0.993563	1	ko03030	Os01g0544450(OsMCM4);Os11g0153900(RbH);Os02g0797400(OsMCM5);MSTRG.17735(--)	K02212+K10743+K02209+K07466
Genetic Information Processing	Folding, sorting and degradation	Protein processing in endoplasmic reticulum	21	236	0.995146	1	ko04141	Os02g0181800(-);Os12g0636000(OsRDCP5);Os03g0822700(-);Os01g0254000(OsARL1d);Os02g0178400(-);Os03g0266300(Oshsp17.9A);Os05g0460200(OsUBC12);Os01g0773600(-);Os01g0840100(OsMed37_1);Os05g0519900(-);Os08g0254500(-);Os11g0482100(-);Os06g0644800(OsOS-9);Os01g0369000(OsCUL1-1);Os07g0187700(PHF1);Os02g0435000(OsNSCC2);Os07g0517100(-);Os02g0261100(UBC5B);Os05g0460000(OsctHSP70-1);Os06g0301000(OsHrd1);Os03…	K14016+K10666+K09562+K07953+K07342+K13993+K10575+K10085+K03283+K07151+K10956+K14007+K10088+K03347+K14003+K12275+K13993+K06689+K03283+K10601+K03283
Genetic Information Processing	Replication and repair	Mismatch repair	2	55	0.997779	1	ko03430	Os05g0274200(-);MSTRG.17735(--)	K08735+K07466
Genetic Information Processing	Translation	RNA transport	15	197	0.998579	1	ko03013	Os08g0176800(OsWD40-156);Os09g0279500(-);Os12g0131300(-);Os07g0685400(-);Os06g0338900(-);Os11g0132700(-);Os07g0167000(eIF-3e);Os01g0794500(-);Os12g0101000(OsCCT39);Os04g0504800(OsPABPC3);Os07g0555200(eIF4Gtsv1);Os07g0495900(-);Os11g0518900(-);Os05g0498400(SUI1);Os03g0143800(LPL2)	K14298+K13126+K14320+K14317+K03241+K14320+K03250+K03113+K03539+K13126+K03260+K14326+K14289+K03113+K05749
Genetic Information Processing	Transcription	Basal transcription factors	2	60	0.998887	1	ko03022	Os07g0205200(-);Os03g0251800(-)	K03130+K03138
Genetic Information Processing	Transcription	RNA polymerase	2	63	0.999267	1	ko03020	Os09g0110400(-);MSTRG.21456(rpoA)	K03011+K03040
Genetic Information Processing	Translation	Aminoacyl-tRNA biosynthesis	2	64	0.999362	1	ko00970	Os06g0103600(-);Os10g0506200(OsValRS3)	K14164+K01873
Genetic Information Processing	Folding, sorting and degradation	Proteasome	2	66	0.999518	1	ko03050	Os09g0326800(OsRpn1a);Os06g0699900(OsRpn1b)	K03028+K03028
Genetic Information Processing	Replication and repair	Base excision repair	1	52	0.999653	1	ko03410	Os02g0530600(OsEnS-38)	K10798
Genetic Information Processing	Transcription	Spliceosome	15	216	0.999738	1	ko03040	Os09g0407900(-);Os07g0633200(-);Os09g0491756(OsC3H60);Os10g0115600(U1-70K);Os06g0343100(-);Os01g0956600(-);Os02g0122800(-);Os01g0840100(OsMed37_1);Os01g0876500(-);Os06g0167000(-);Os07g0141600(-);Os11g0704700(-);Os03g0314100(PRP-22);Os05g0460000(OsctHSP70-1);Os03g0277300(HSP70)	K12847+K12900+K12836+K11093+K12818+K12837+K12893+K03283+K12831+K12856+K12844+K12900+K12820+K03283+K03283
Genetic Information Processing	Translation	Ribosome biogenesis in eukaryotes	4	99	0.999783	1	ko03008	Os04g0576300(OsSTA131);Os03g0762000(HD6);Os03g0370500(-);Os12g0101000(OsCCT39)	K11131+K03097+K11131+K03539
Genetic Information Processing	Replication and repair	Homologous recombination	3	86	0.999785	1	ko03440	Os04g0648700(EME1);Os05g0486600(BARD1);MSTRG.17735(--)	K10882+K10683+K07466
Genetic Information Processing	Replication and repair	Nucleotide excision repair	1	86	0.999998	1	ko03420	MSTRG.17735(--)	K07466
Genetic Information Processing	Translation	Ribosome	17	359	1	1	ko03010	Os01g0678600(-);Os03g0219900(-);Os08g0234000(-);Os03g0452300(-);Os03g0704000(-);Os05g0388500(-);Os01g0805000(-);Os03g0265400(-);Os03g0755700(-);Os03g0315800(-);gene-rps2(-);gene-rps18(-);gene-rps7-3(-);gene-rps4(-);gene-rps19-2(-);gene-rps2-2(-);MSTRG.9479(RPS2)	K02968+K02876+K02937+K02988+K02952+K02863+K02914+K02926+K02872+K02945+K02967+K02963+K02992+K02986+K02965+K02967+K02967

## Sheet: zj-esa-vs-zj-esc
All enrichment pathways of mRNAs of the comparison between zj-esa and zj-esc.
KEGG_A_class	KEGG_B_class	Pathway	Pir1a-vs-Pir1c (958)	All (5841)	Pvalue	Qvalue	Pathway ID	Genes	K_IDs
Metabolism	Global and overview maps	Metabolic pathways	539	2748	2.61522e-10	2.67075e-08	ko01100	Os07g0677100(POX8.1);Os06g0215600(OsOPR5);Os11g0588300(OsGSTT1);Os08g0342400(-);Os07g0613000(-);Os04g0688100(prx59);Os06g0726400(SBE1);Os10g0542900(Cht8);Os04g0486950(-);Os07g0412100(GBSSII);Os06g0306300(prx78);Os06g0486900(FDH2);Os03g0181500(ONI1);Os01g0654500(-);Os07g0676900(prx109);Os07g0115300(prx98);Os03g0425300(-);Os06g0521500(prx83);Os07g0616200(-);Os04g0469800(D11);Os05g0565500(-);Os03g03…	K00430+K05894+K00799+K12524+K00951+K00430+K00700+K20547+K01638+K13679+K00430+K00122+K15397+K00031+K00430+K00430+K00901+K00430+K09458+K12639+K00020+K01510+K05280+K16871+K17872+K01853+K01904+K00106+K01193+K00249+K00606+K08679+K00627+K01723+K01193+K22913+K07407+K00058+K14190+K07408+K05286+K00895+K01183+K11147+K11262+K01057+K08099+K08967+K18857+K00430+K01823+K02150+K09590+K13065+K00430+K12309+K09753+…
Metabolism	Global and overview maps	Biosynthesis of secondary metabolites	333	1549	4.04658e-10	2.67075e-08	ko01110	Os07g0677100(POX8.1);Os06g0215600(OsOPR5);Os08g0342400(-);Os04g0688100(prx59);Os06g0726400(SBE1);Os04g0486950(-);Os07g0412100(GBSSII);Os06g0306300(prx78);Os03g0181500(ONI1);Os01g0654500(-);Os07g0676900(prx109);Os07g0115300(prx98);Os02g0569400(CYP76M8);Os02g0570700(Oscyp71Z7);Os03g0425300(-);Os06g0521500(prx83);Os04g0469800(D11);Os05g0526900(OsUGT706D2);Os10g0320100(OsF3'H);Os06g0214900(-);Os02g01…	K00430+K05894+K12524+K00430+K00700+K01638+K13679+K00430+K15397+K00031+K00430+K00430+K16084+K21291+K00901+K00430+K12639+K22845+K05280+K17872+K01853+K01904+K00106+K16085+K01193+K00249+K00606+K00627+K01723+K01193+K00058+K14190+K00895+K11262+K01057+K08099+K18857+K00430+K01823+K09590+K13065+K00430+K14036+K09753+K14652+K13035+K13606+K09834+K08101+K00430+K01114+K10527+K00053+K16085+K01738+K08241+K00430+…
Metabolism	Lipid metabolism	Fatty acid degradation	26	54	5.02281e-08	2.21003e-06	ko00071	Os07g0675000(-);Os05g0529200(-);Os11g0210500(Adh2*);Os01g0348600(-);Os03g0310400(-);Os01g0110400(-);Os02g0817700(OsI57);Os02g0274100(AIM1);Os02g0730000(OsALDH2a);Os05g0317200(LACS8);Os01g0681200(-);Os05g0132100(OsLACS1);Os11g0210600(Adh3);Os06g0103500(ACX1);Os10g0159800(-);Os11g0605500(ACX2);Os11g0147000(-);Os01g0655800(-);Os06g0270900(OsALDH2B1);Os09g0440300(ALDH7);Os11g0186200(OsALDH3H2);Os05g0…	K00249+K07517+K18857+K10527+K01692+K00626+K07513+K10527+K00128+K01897+K01897+K01897+K00001+K00232+K00001+K00232+K01897+K01897+K00128+K14085+K00128+K00232+K00128+K00121+K00232+K00128
Metabolism	Lipid metabolism	Glycerolipid metabolism	33	95	8.90072e-06	0.000293724	ko00561	Os03g0425300(-);Os10g0492900(-);Os01g0682500(-);Os12g0100500(-);Os01g0762000(OspPLAIValpha);Os04g0647800(-);Os06g0563900(-);Os01g0847800(AKR3);Os02g0730000(OsALDH2a);Os01g0783200(-);Os01g0666000(-);Os02g0539100(-);Os05g0363100(-);Os11g0679700(OsGPAT3);Os12g0576900(-);Os03g0810900(OspPLAIVbeta);Os06g0270900(OsALDH2B1);Os06g0326700(-);Os09g0394700(-);Os09g0440300(ALDH7);Os11g0615000(-);Os11g0186200…	K00901+K07407+K15918+K01054+K14674+K00864+K11155+K00002+K00128+K00901+K18693+K09480+K01054+K13508+K00901+K14674+K00128+K22848+K01054+K14085+K15728+K00128+K01054+K11155+K09480+K00128+K13523+K15728+K01054+K18693+K00128+K13508+K07407
Metabolism	Metabolism of terpenoids and polyketides	Diterpenoid biosynthesis	20	53	0.000143545	0.00324965	ko00904	Os02g0569400(CYP76M8);Os02g0570700(Oscyp71Z7);Os04g0178400(-);Os02g0570400(OsKS7);Os04g0180400(CYP99A2);Os04g0179200(OsMAS);Os01g0209700(OsGA2ox7);Os02g0630300(OsGA2ox9);Os12g0491800(OsKSL10);Os02g0571900(CYP76M6);Os04g0178300(OsCPS4);Os04g0179700(OsKS4);Os06g0599200(-);Os03g0650200(-);Os06g0568600(OsKO5);Os02g0278700(OsCPS1);Os02g0569900(OsCYP76M7);Os03g0856700(GA20OX1);Os11g0474800(OsKS8);Os05g…	K16084+K21291+K16085+K14036+K16085+K13070+K04125+K04125+K14037+K21718+K14043+K14046+K16084+K22639+K04122+K04120+K16084+K05282+K14044+K04125
Metabolism	Lipid metabolism	alpha-Linolenic acid metabolism	22	61	0.000147711	0.00324965	ko00592	Os06g0215600(OsOPR5);Os03g0225900(AOS2);Os11g0210500(Adh2*);Os01g0348600(-);Os05g0102000(OsJMT1);Os02g0218700(HPL2);Os01g0762000(OspPLAIValpha);Os02g0817700(OsI57);Os02g0274100(AIM1);Os12g0559200(OsLOX11);Os09g0513100(-);Os06g0216200(OsOPR2);Os05g0355800(-);Os06g0103500(ACX1);Os11g0605500(ACX2);Os02g0110200(HPL3);Os08g0509100(OsLOX8);Os03g0810900(OspPLAIVbeta);Os04g0615100(-);Os12g0559934(-);Os05…	K05894+K01723+K18857+K10527+K08241+K01723+K14674+K07513+K10527+K00454+K22389+K05894+K00454+K00232+K00232+K10528+K00454+K14674+K22389+K00454+K00232+K00232
Metabolism	Metabolism of other amino acids	beta-Alanine metabolism	18	49	0.000450324	0.00849183	ko00410	Os02g0736400(OsDHODH1);Os03g0310400(-);Os06g0338200(OsDAO1);Os02g0730000(OsALDH2a);Os07g0188800(OsALDH6B2);Os01g0807900(-);Os06g0103500(ACX1);Os09g0368200(PAOb);Os11g0605500(ACX2);Os06g0270900(OsALDH2B1);Os09g0440300(ALDH7);Os11g0186200(OsALDH3H2);Os05g0163700(OsACX4);Os02g0647900(OsALDH3E2);Os06g0354500(ACX3);Os06g0338700(-);Os03g0236200(OsGAD3);Os02g0646500(OS-ALDH)	K00207+K01692+K00276+K00128+K00140+K01464+K00232+K13366+K00232+K00128+K14085+K00128+K00232+K00128+K00232+K00276+K01580+K00128
Metabolism	Global and overview maps	Carbon metabolism	72	307	0.000655918	0.0106268	ko01200	Os04g0486950(-);Os06g0486900(FDH2);Os01g0654500(-);Os12g0182200(-);Os08g0447000(-);Os08g0547100(-);Os12g0625000(rcs1);Os07g0529000(OsEnS-107);Os01g0760600(-);Os02g0105200(-);Os01g0110400(-);Os10g0405600(OsPFK10);Os01g0682500(-);Os12g0616900(-);Os06g0608700(OsAld-Y);Os01g0118000(-);Os04g0485300(OsG6PDH2);Os06g0548000(-);Os01g0866400(FR);Os06g0149900(-);Os06g0256500(Pgi2(Pgib));Os06g0727200(CATB);O…	K01638+K00122+K00031+K00627+K00058+K01057+K01738+K01637+K14454+K00627+K00626+K00850+K15918+K00162+K01623+K01623+K00036+K14455+K03841+K01738+K01810+K03781+K00261+K00033+K00162+K00850+K15919+K00627+K19269+K00140+K00640+K00234+K01455+K00627+K00616+K00232+K01647+K00036+K01810+K11517+K00927+K00232+K01895+K01807+K00844+K00873+K00026+K00232+K00030+K01602+K03781+K15634+K00025+K02437+K01602+K00029+K00074+…
Metabolism	Amino acid metabolism	Tyrosine metabolism	18	51	0.000784733	0.0106268	ko00350	Os11g0210500(Adh2*);Os11g0245100(OsGSTZ4);Os01g0760600(-);Os12g0210200(OsGSTZ1);Os06g0345200(OsNAAT4);Os06g0338200(OsDAO1);Os06g0548000(-);Os11g0644800(-);Os02g0797500(AST);Os06g0103300(-);Os08g0140300(TDC1);Os02g0302200(-);Os11g0210600(Adh3);Os10g0159800(-);Os02g0168100(OsHPPD);Os03g0189600(-);Os06g0338700(-);Os03g0829000(-)	K18857+K01800+K14454+K01800+K00815+K00276+K14455+K00815+K00811+K00451+K01593+K00815+K00001+K00001+K00457+K00121+K00276+K01557
Metabolism	Amino acid metabolism	Valine, leucine and isoleucine degradation	18	52	0.00101975	0.0106268	ko00280	Os05g0565500(-);Os07g0675000(-);Os03g0310400(-);Os01g0110400(-);Os02g0817700(OsI57);Os02g0730000(OsALDH2a);Os12g0183100(-);Os07g0188800(OsALDH6B2);Os01g0269000(-);Os06g0270900(OsALDH2B1);Os09g0440300(ALDH7);Os01g0314100(-);Os11g0186200(OsALDH3H2);Os02g0647900(OsALDH3E2);Os03g0662000(-);Os02g0646500(OS-ALDH);Os03g0231600(-);Os05g0156700(-)	K00020+K00249+K01692+K00626+K07513+K00128+K00166+K00140+K01640+K00128+K14085+K09699+K00128+K00128+K00382+K00128+K00826+K00382
Metabolism	Carbohydrate metabolism	Glycolysis / Gluconeogenesis	42	161	0.00102002	0.0106268	ko00010	Os12g0182200(-);Os08g0345700(OsPFPA3);Os11g0210500(Adh2*);Os02g0105200(-);Os10g0405600(OsPFK10);Os12g0616900(-);Os06g0608700(OsAld-Y);Os02g0714200(OsPFPA1);Os01g0118000(-);Os01g0866400(FR);Os06g0256500(Pgi2(Pgib));Os08g0536000(-);Os06g0151900(OsPFK06);Os01g0847800(AKR3);Os02g0730000(OsALDH2a);Os06g0499900(-);Os03g0818100(-);Os04g0458600(-);Os08g0431300(-);Os11g0210600(Adh3);Os10g0159800(-);Os03g0…	K00627+K00895+K18857+K00627+K00850+K00162+K01623+K00895+K01623+K03841+K01810+K00162+K00850+K00002+K00128+K00627+K03103+K01785+K00627+K00001+K00001+K01810+K00927+K01568+K01895+K00844+K00873+K00128+K14085+K00128+K15634+K00128+K01792+K00121+K00382+K00134+K01689+K00128+K01785+K00382+K00850+K01568
Metabolism	Metabolism of terpenoids and polyketides	Limonene and pinene degradation	6	9	0.00102867	0.0106268	ko00903	Os03g0310400(-);Os02g0730000(OsALDH2a);Os06g0270900(OsALDH2B1);Os11g0186200(OsALDH3H2);Os02g0647900(OsALDH3E2);Os02g0646500(OS-ALDH)	K01692+K00128+K00128+K00128+K00128+K00128
Metabolism	Global and overview maps	Fatty acid metabolism	27	91	0.00104658	0.0106268	ko01212	Os07g0616200(-);Os07g0675000(-);Os10g0363300(ACC1);Os01g0348600(-);Os03g0310400(-);Os01g0110400(-);Os04g0271200(OsPAS2);Os08g0225000(ZL16);Os06g0185100(-);Os07g0417200(OsFAD2-2);Os02g0817700(OsI57);Os02g0274100(AIM1);Os02g0716500(OsFAD2);Os05g0317200(LACS8);Os01g0681200(-);Os05g0132100(OsLACS1);Os06g0103500(ACX1);Os04g0116600(-);Os11g0605500(ACX2);Os07g0416900(OsFAD2-3);Os11g0147000(-);Os01g06558…	K09458+K00249+K11262+K10527+K01692+K00626+K10703+K02372+K00059+K10256+K07513+K10527+K10256+K01897+K01897+K01897+K00232+K10251+K00232+K10256+K01897+K01897+K00232+K00232+K00645+K10256+K00059
Metabolism	Carbohydrate metabolism	Propanoate metabolism	13	34	0.00180843	0.0170509	ko00640	Os10g0363300(ACC1);Os03g0310400(-);Os01g0110400(-);Os12g0183100(-);Os07g0188800(OsALDH6B2);Os06g0103500(ACX1);Os11g0605500(ACX2);Os02g0525900(-);Os01g0314100(-);Os05g0163700(OsACX4);Os06g0354500(ACX3);Os03g0662000(-);Os05g0156700(-)	K11262+K01692+K00626+K00166+K00140+K00232+K00232+K01895+K09699+K00232+K00232+K00382+K00382
Metabolism	Carbohydrate metabolism	Pyruvate metabolism	27	95	0.00211279	0.0185925	ko00620	Os04g0486950(-);Os12g0182200(-);Os10g0363300(ACC1);Os02g0105200(-);Os01g0110400(-);Os12g0616900(-);Os08g0191700(GLYI-11);Os08g0536000(-);Os02g0730000(OsALDH2a);Os06g0499900(-);Os03g0332400(GLYII-2);Os08g0431300(-);Os02g0525900(-);Os11g0216000(-);Os12g0632700(-);Os06g0270900(OsALDH2B1);Os09g0440300(ALDH7);Os11g0186200(OsALDH3H2);Os04g0551200(-);Os02g0647900(OsALDH3E2);Os01g0723400(NADP-ME2);Os03g0…	K01638+K00627+K11262+K00627+K00626+K00162+K01759+K00162+K00128+K00627+K01069+K00627+K01895+K00873+K00026+K00128+K14085+K00128+K00025+K00128+K00029+K01679+K00382+K00029+K01759+K00128+K00382
Metabolism	Amino acid metabolism	Tryptophan metabolism	22	81	0.00934468	0.0728313	ko00380	Os09g0528700(OsCYP76M7);Os04g0475600(-);Os03g0310400(-);Os01g0110400(-);Os06g0328900(-);Os09g0344500(ZRP4);Os06g0727200(CATB);Os10g0515200(-);Os02g0730000(OsALDH2a);Os04g0128900(YUCCA7);Os08g0140300(TDC1);Os04g0118100(OsAMI1);Os01g0273800(OsYUCCA9);Os02g0592000(-);Os06g0270900(OsALDH2B1);Os09g0440300(ALDH7);Os11g0186200(OsALDH3H2);Os02g0115700(CATA1);Os02g0647900(OsALDH3E2);Os03g0662000(-);Os02g0…	K07408+K23947+K01692+K00626+K07408+K22588+K03781+K07408+K00128+K11816+K01593+K01426+K11816+K23947+K00128+K14085+K00128+K03781+K00128+K00382+K00128+K00382
Metabolism	Metabolism of other amino acids	Cyanoamino acid metabolism	19	67	0.00937978	0.0728313	ko00460	Os02g0635200(NIT1);Os01g0508000(Os1bglu1);Os03g0212800(Os3bglu6);Os04g0474900(OsTAGG1);Os05g0366600(Os5bglu22);Os01g0813800(Os1bglu3);Os01g0764900(-);Os03g0749500(-);Os04g0474300(Os4bglu9);Os12g0512800(OsCYP71E5);Os03g0597600(OsASNase1);Os01g0151500(-);Os03g0749300(OsBGLU1);Os04g0474500(Os4bglu10);Os03g0703000(Os3bglu7);Os04g0474800(Os4bglu12);Os09g0511600(Os9bglu31);Os05g0365700(Os5bglu20);Os05g…	K13035+K05350+K01188+K01188+K01188+K01188+K01455+K01188+K01188+K13029+K13051+K18592+K05349+K01188+K05350+K01188+K01188+K01188+K01188
Metabolism	Lipid metabolism	Linoleic acid metabolism	8	20	0.0100961	0.0740377	ko00591	Os01g0762000(OspPLAIValpha);Os12g0559200(OsLOX11);Os05g0355800(-);Os08g0509100(OsLOX8);Os03g0810900(OspPLAIVbeta);Os03g0700400(LOX-3);Os12g0559934(-);Os03g0700700(OsLOX1)	K14674+K00454+K00454+K00454+K14674+K15718+K00454+K15718
Metabolism	Carbohydrate metabolism	Glyoxylate and dicarboxylate metabolism	24	92	0.0114996	0.074972	ko00630	Os04g0486950(-);Os06g0486900(FDH2);Os07g0529000(OsEnS-107);Os01g0110400(-);Os01g0682500(-);Os06g0727200(CATB);Os04g0106400(-);Os09g0261300(-);Os01g0764900(-);Os02g0194100(-);Os07g0616500(GLO5);Os02g0525900(-);Os12g0632700(-);Os12g0292400(RBCS);Os02g0115700(CATA1);Os04g0551200(-);Os10g0516100(OsGDCH);Os12g0274700(RBCS);Os03g0662000(-);Os04g0107500(-);Os02g0232400(-);Os04g0623800(Amt);Os05g0156700(…	K01638+K00122+K01637+K00626+K15918+K03781+K15919+K19269+K01455+K01647+K11517+K01895+K00026+K01602+K03781+K00025+K02437+K01602+K00382+K15919+K01647+K00605+K00382+K01601
Metabolism	Amino acid metabolism	Alanine, aspartate and glutamate metabolism	17	59	0.0115343	0.074972	ko00250	Os02g0112900(OsGABA-T);Os05g0536400(-);Os01g0760600(-);Os03g0291500(ASN1);Os05g0555600(OsGLT2);Os06g0548000(-);Os04g0543900(OsGDH2);Os02g0797500(AST);Os08g0248800(-);Os03g0597600(OsASNase1);Os04g0614600(OSL2);Os01g0558200(-);Os10g0390500(ALAAT);Os05g0430800(-);Os03g0236200(OsGAD3);Os02g0650900(OsGDH3);Os01g0873100(-)	K16871+K00294+K14454+K01953+K00264+K14455+K00261+K00811+K00609+K13051+K16871+K00262+K00814+K00764+K01580+K00261+K00764
Cellular Processes	Transport and catabolism	Peroxisome	26	102	0.0119274	0.074972	ko04146	Os01g0654500(-);Os03g0429800(-);Os09g0133200(-);Os02g0817700(OsI57);Os05g0323900(SODA1);Os06g0727200(CATB);Os03g0708100(OMT7);Os07g0665200(Cu/Zn-SOD);Os01g0505400(-);Os01g0269000(-);Os05g0317200(LACS8);Os01g0681200(-);Os08g0500100(OsPEX5);Os05g0132100(OsLACS1);Os06g0103500(ACX1);Os02g0123200(-);Os07g0616500(GLO5);Os07g0608800(OsRFP);Os11g0605500(ACX2);Os11g0147000(-);Os01g0655800(-);Os05g0163700(…	K00031+K00106+K11147+K07513+K04564+K03781+K00477+K04565+K12261+K01640+K01897+K01897+K13342+K01897+K00232+K13335+K11517+K13346+K00232+K01897+K01897+K00232+K03781+K00232+K13356+K13354
Metabolism	Carbohydrate metabolism	Citrate cycle (TCA cycle)	17	61	0.0161903	0.0971421	ko00020	Os01g0654500(-);Os12g0182200(-);Os02g0105200(-);Os12g0616900(-);Os08g0536000(-);Os06g0499900(-);Os07g0134800(SDH1);Os01g0300200(-);Os08g0431300(-);Os02g0194100(-);Os12g0632700(-);Os04g0479200(-);Os04g0551200(-);Os03g0337900(-);Os03g0662000(-);Os02g0232400(-);Os05g0156700(-)	K00031+K00627+K00627+K00162+K00162+K00627+K00234+K01648+K00627+K01647+K00026+K00030+K00025+K01679+K00382+K01647+K00382
Metabolism	Biosynthesis of other secondary metabolites	Caffeine metabolism	2	2	0.0268768	0.152304	ko00232	Os03g0429800(-);Os01g0865100(-)	K00106+K00365
Metabolism	Lipid metabolism	Biosynthesis of unsaturated fatty acids	12	41	0.0276915	0.152304	ko01040	Os04g0271200(OsPAS2);Os07g0417200(OsFAD2-2);Os02g0817700(OsI57);Os02g0716500(OsFAD2);Os04g0558400(-);Os06g0103500(ACX1);Os04g0116600(-);Os11g0605500(ACX2);Os07g0416900(OsFAD2-3);Os05g0163700(OsACX4);Os06g0354500(ACX3);Os07g0416700(OsFAD2-4)	K10703+K10256+K07513+K10256+K01068+K00232+K10251+K00232+K10256+K00232+K00232+K10256
Metabolism	Metabolism of terpenoids and polyketides	Sesquiterpenoid and triterpenoid biosynthesis	7	20	0.0340741	0.171603	ko00909	Os03g0347900(-);Os08g0139700(OsTPS29);Os07g0218200(TPS3);Os03g0184550(-);Os07g0200700(-);Os11g0285000(OsOSC8);MSTRG.18365(TPS7)	K15803+K15803+K15803+K15891+K00801+K19011+K15803
Metabolism	Metabolism of other amino acids	Glutathione metabolism	30	132	0.034866	0.171603	ko00480	Os11g0588300(OsGSTT1);Os01g0654500(-);Os02g0813500(OsGR2);Os04g0485300(OsG6PDH2);Os10g0528300(OsGSTU4);Os11g0484500(Os6PGDH2);Os01g0369700(OsGSTF5);Os08g0562700(-);Os01g0371200(OsGSTF1);Os03g0358100(OsGpx2);Os10g0529400(OsGSTU9);Os12g0434400(-);Os04g0556300(OsGpx1);Os12g0528400(-);Os02g0600400(OsG6PDH1);Os10g0527800(OsGSTU12);Os01g0151500(-);Os10g0529600(-);Os10g0529700(OsGSTU8);Os10g0528200(GST)…	K00799+K00031+K00383+K00036+K00799+K00033+K00799+K01256+K00799+K00432+K00799+K01255+K00432+K21456+K00036+K00799+K18592+K00799+K00799+K00799+K00799+K00434+K00799+K00799+K00799+K00799+K00799+K01919+K00799+K00799
Metabolism	Biosynthesis of other secondary metabolites	Phenylpropanoid biosynthesis	55	266	0.0354311	0.171603	ko00940	Os07g0677100(POX8.1);Os04g0688100(prx59);Os06g0306300(prx78);Os07g0676900(prx109);Os07g0115300(prx98);Os06g0521500(prx83);Os10g0578950(OsACS2);Os01g0327100(prx15);Os04g0500700(OsHCT1);Os03g0762300(-);Os08g0441500(OsCCR);Os01g0591300(OsALDH2C1);Os10g0109300(PRX125);Os01g0326100(RP-2);Os04g0688300(prx61);Os01g0326300(-);Os01g0508000(Os1bglu1);Os02g0240300(prx29);Os03g0762400(prx51);Os06g0547400(prx…	K00430+K00430+K00430+K00430+K00430+K00430+K01904+K00430+K13065+K00430+K09753+K12355+K00430+K00430+K00430+K00430+K05350+K00430+K00430+K00430+K01188+K01188+K00430+K00430+K01188+K00430+K01188+K09753+K01188+K01188+K00430+K00430+K00430+K00430+K00430+K01904+K00430+K05349+K01188+K00430+K00083+K01904+K09755+K05350+K01188+K00430+K01188+K01904+K23260+K13065+K01188+K01188+K00083+K09754+K12355
Metabolism	Biosynthesis of other secondary metabolites	Isoquinoline alkaloid biosynthesis	9	29	0.0373275	0.171603	ko00950	Os01g0760600(-);Os06g0345200(OsNAAT4);Os06g0338200(OsDAO1);Os06g0548000(-);Os11g0644800(-);Os02g0797500(AST);Os08g0140300(TDC1);Os02g0302200(-);Os06g0338700(-)	K14454+K00815+K00276+K14455+K00815+K00811+K01593+K00815+K00276
Metabolism	Carbohydrate metabolism	Pentose phosphate pathway	16	62	0.0385055	0.171603	ko00030	Os08g0345700(OsPFPA3);Os08g0547100(-);Os10g0405600(OsPFK10);Os06g0608700(OsAld-Y);Os02g0714200(OsPFPA1);Os01g0118000(-);Os04g0485300(OsG6PDH2);Os01g0866400(FR);Os06g0256500(Pgi2(Pgib));Os11g0484500(Os6PGDH2);Os06g0151900(OsPFK06);Os01g0926300(-);Os02g0600400(OsG6PDH1);Os03g0776000(Pgi1(Pgia));Os04g0306400(OsRPI);MSTRG.2915(PFK7)	K00895+K01057+K00850+K01623+K00895+K01623+K00036+K03841+K01810+K00033+K00850+K00616+K00036+K01810+K01807+K00850
Metabolism	Lipid metabolism	Glycerophospholipid metabolism	29	128	0.0390008	0.171603	ko00564	Os03g0425300(-);Os03g0826600(NPC1);Os02g0514500(-);Os01g0762000(OspPLAIValpha);Os05g0171000(OsPLDalpha2);Os09g0513100(-);Os01g0183000(-);Os01g0783200(-);Os01g0666000(-);Os05g0548900(OsPEAMT2);Os05g0495700(GPDH1);Os10g0387000(-);Os01g0763600(-);Os11g0679700(OsGPAT3);Os01g0172400(OsPLDalpha1);Os12g0576900(-);Os03g0810900(OspPLAIVbeta);Os04g0615100(-);Os03g0852800(OsNPC3);Os11g0615000(-);Os02g012360…	K00901+K01114+K18696+K14674+K01115+K22389+K14156+K00901+K18693+K05929+K00006+K00967+K01126+K13508+K01115+K00901+K14674+K22389+K01114+K15728+K00999+K13523+K15728+K14156+K18693+K01126+K01517+K13508+K00111
Cellular Processes	Transport and catabolism	Phagosome	22	93	0.0435532	0.185452	ko04145	Os03g0791500(-);Os01g0659200(v-ATP-E);Os06g0662000(PLS1);Os02g0178400(-);Os01g0227300(OsRab7B1);Os05g0516600(OsRab7B3);Os05g0180600(-);Os06g0568200(OsVHA-B);Os11g0169900(-);Os06g0259000(-);Os12g0168900(-);Os01g0834200(-);Os06g0234200(OsRAC4);Os12g0236700(-);Os01g0805900(OsTUB4);Os08g0307300(-);Os05g0413200(TUB6);Os04g0601700(-);Os08g0428900(-);Os05g0593100(-);Os02g0742200(OsRac3);Os03g0105600(OsT…	K08517+K02150+K02145+K07342+K07897+K07897+K00914+K02147+K02155+K00921+K02155+K02154+K04392+K00921+K07375+K08517+K07375+K02152+K00921+K02148+K04392+K07375
Metabolism	Glycan biosynthesis and metabolism	Glycosaminoglycan degradation	6	17	0.0468048	0.19307	ko00531	Os05g0539400(OsBgal9);Os01g0931100(-);Os11g0543500(-);Os06g0179000(-);Os12g0578400(-);Os07g0575500(-)	K12309+K10532+K10532+K07964+K07964+K12373
Metabolism	Lipid metabolism	Sphingolipid metabolism	10	35	0.0495751	0.197056	ko00600	Os10g0492900(-);Os05g0539400(OsBgal9);Os11g0516000(OsLCB2a3);Os02g0581300(-);Os02g0745700(-);Os01g0100900(SPL1);Os02g0656200(OsCERK);Os03g0698900(-);Os07g0679300(alpha-Gal);MSTRG.7056(Os05g0567100)	K07407+K12309+K00654+K23727+K04713+K01634+K04715+K04711+K07407+K04718
Metabolism	Metabolism of terpenoids and polyketides	Brassinosteroid biosynthesis	8	26	0.050757	0.197056	ko00905	Os04g0469800(D11);Os03g0602300(brd1);Os11g0143200(OsCPD1);Os02g0204700(OsCYP734A2);Os12g0139300(OsCPD2);Os06g0600400(OsCYP734A4);Os07g0136800(-);Os03g0227700(OsDWF4)	K12639+K09590+K09588+K15639+K09588+K15639+K09589+K09587
Metabolism	Amino acid metabolism	Lysine degradation	13	50	0.0555094	0.20935	ko00310	Os03g0310400(-);Os01g0110400(-);Os02g0730000(OsALDH2a);Os01g0927000(SDG714);Os03g0307800(IEZ1);Os05g0490700(OsSET22);Os06g0270900(OsALDH2B1);Os09g0440300(ALDH7);Os11g0186200(OsALDH3H2);Os02g0647900(OsALDH3E2);Os03g0662000(-);Os02g0646500(OS-ALDH);Os05g0156700(-)	K01692+K00626+K00128+K11420+K11430+K11420+K00128+K14085+K00128+K00128+K00382+K00128+K00382
Metabolism	Amino acid metabolism	Arginine biosynthesis	10	37	0.0694254	0.25456	ko00220	Os01g0760600(-);Os06g0548000(-);Os04g0543900(OsGDH2);Os02g0797500(AST);Os04g0106300(OsARG);Os02g0657600(OsNAGK2);Os01g0558200(-);Os05g0129100(-);Os10g0390500(ALAAT);Os02g0650900(OsGDH3)	K14454+K14455+K00261+K00811+K01476+K00930+K00262+K00818+K00814+K00261
Metabolism	Biosynthesis of other secondary metabolites	Benzoxazinoid biosynthesis	2	3	0.0718295	0.256256	ko00402	Os03g0797400(OsIGL);Os03g0797500(-)	K13222+K13222
Metabolism	Metabolism of cofactors and vitamins	Ubiquinone and other terpenoid-quinone biosynthesis	14	58	0.0822413	0.278394	ko00130	Os06g0214900(-);Os10g0578950(OsACS2);Os02g0276500(OsVTE1);Os06g0345200(OsNAAT4);Os11g0644800(-);Os03g0691400(-);Os08g0388900(-);Os09g0361500(ICS1);Os02g0302200(-);Os01g0784800(-);Os03g0152400(OsACS1);Os07g0280200(OsACS7);Os02g0168100(OsHPPD);Os02g0697400(4CL2)	K17872+K01904+K09834+K00815+K00815+K19222+K06125+K02552+K00815+K03809+K01904+K01904+K00457+K01904
Cellular Processes	Transport and catabolism	Autophagy - other eukaryotes	11	43	0.0822527	0.278394	ko04136	Os03g0746600(OsWD40-91);Os05g0180600(-);Os07g0512200(Atg8);Os03g0644000(ATG6B);Os03g0268200(OsATG1a);Os02g0179800(-);Os11g0100100(OsATG8e);Os03g0248000(OsATG9a);Os03g0167700(OsPP44);Os05g0235300(OsTOR);Os10g0163100(OsATG9b)	K17890+K00914+K08341+K08334+K08269+K08330+K08341+K17907+K04382+K07203+K17907
Metabolism	Amino acid metabolism	Phenylalanine metabolism	13	55	0.104841	0.344422	ko00360	Os03g0310400(-);Os01g0760600(-);Os06g0345200(OsNAAT4);Os06g0338200(OsDAO1);Os06g0548000(-);Os11g0644800(-);Os02g0797500(AST);Os08g0140300(TDC1);Os02g0302200(-);Os04g0118100(OsAMI1);Os02g0168100(OsHPPD);Os01g0796400(-);Os06g0338700(-)	K01692+K14454+K00815+K00276+K14455+K00815+K00811+K01593+K00815+K01426+K00457+K00074+K00276
Metabolism	Biosynthesis of other secondary metabolites	Tropane, piperidine and pyridine alkaloid biosynthesis	9	35	0.10698	0.344422	ko00960	Os01g0760600(-);Os06g0345200(OsNAAT4);Os06g0338200(OsDAO1);Os06g0548000(-);Os11g0644800(-);Os04g0269100(-);Os02g0797500(AST);Os02g0302200(-);Os06g0338700(-)	K14454+K00815+K00276+K14455+K00815+K08081+K00811+K00815+K00276
Metabolism	Carbohydrate metabolism	Inositol phosphate metabolism	17	77	0.117384	0.368922	ko00562	Os08g0109100(-);Os03g0826600(NPC1);Os12g0562400(OsPLC3);Os08g0556700(-);Os05g0180600(-);Os03g0818100(-);Os06g0259000(-);Os02g0554300(-);Os07g0188800(OsALDH6B2);Os06g0195600(-);Os12g0236700(-);Os02g0782600(-);Os03g0852800(OsNPC3);Os02g0123600(-);Os02g0466400(OsITPK4);Os08g0428900(-);Os09g0518700(OsITPK6)	K22913+K01114+K05857+K18081+K00914+K03103+K00921+K21797+K00140+K22913+K00921+K22913+K01114+K00999+K00913+K00921+K01765
Metabolism	Carbohydrate metabolism	Butanoate metabolism	9	36	0.122987	0.371572	ko00650	Os02g0112900(OsGABA-T);Os03g0310400(-);Os04g0389800(-);Os01g0110400(-);Os01g0269000(-);Os02g0608600(-);Os04g0614600(OSL2);Os01g0796400(-);Os03g0236200(OsGAD3)	K16871+K01692+K01652+K00626+K01640+K01653+K16871+K00074+K01580
Metabolism	Carbohydrate metabolism	Galactose metabolism	15	67	0.123857	0.371572	ko00052	Os04g0664900(OsCIN5);Os02g0534400(OSCIN1);Os10g0492900(-);Os05g0539400(OsBgal9);Os10g0405600(OsPFK10);Os06g0151900(OsPFK06);Os04g0458600(-);Os05g0187100(HXK7);Os09g0526700(OsUGE3);Os09g0323000(OsUGE4);Os05g0595100(OsUGE1);Os07g0209100(-);Os10g0155500(-);Os07g0679300(alpha-Gal);MSTRG.2915(PFK7)	K01193+K01193+K07407+K12309+K00850+K00850+K01785+K00844+K01784+K01784+K01784+K06617+K01785+K07407+K00850
Metabolism	Metabolism of cofactors and vitamins	Porphyrin and chlorophyll metabolism	12	52	0.133173	0.390641	ko00860	Os10g0419600(OsCHL);Os01g0227100(NYC1);Os01g0949400(Se13);Os03g0654600(NOL);Os10g0389200(OsRCCR1);Os04g0490100(-);Os04g0678700(OsPorA);Os03g0146400(OsPAO);Os09g0532000(SGR);Os10g0389300(OsRCCR2);Os04g0320100(OsHCAR);Os03g0337600(UroD)	K08099+K13606+K08101+K13606+K13545+K00231+K00218+K13071+K22013+K13545+K18010+K01599
Environmental Information Processing	Signal transduction	MAPK signaling pathway - plant	41	212	0.14008	0.40197	ko04016	Os10g0542900(Cht8);Os05g0539800(OsRTH2);Os04g0556000(HMA5);Os07g0124900(OsPR1#071);Os06g0665800(HMA9);Os03g0132900(Cht11);Os04g0618700(Os-FLS2);Os03g0310800(-);Os03g0297600(OsPYL/RCAR4);Os04g0432000(SAPK7);Os05g0474800(OsWRKY70);Os09g0325700(PP2C1);Os01g0846300(OsPP15);Os01g0382400(OsPR1#012);Os02g0322400(-);Os02g0135200(OsMPK13);Os03g0268600(OsPP2C30);Os06g0727200(CATB);Os01g0643800(-);Os06g0726…	K20547+K20726+K17686+K13449+K17686+K20547+K13420+K02183+K14496+K14498+K13424+K14497+K14497+K13449+K20716+K20538+K14497+K03781+K20538+K20547+K14496+K20726+K13422+K13449+K20717+K20535+K20538+K13449+K14498+K13449+K13447+K03781+K20547+K13449+K17686+K14496+K02183+K14497+K14496+K13449+K14516
Metabolism	Carbohydrate metabolism	Starch and sucrose metabolism	38	197	0.15486	0.429884	ko00500	Os06g0726400(SBE1);Os07g0412100(GBSSII);Os04g0664900(OsCIN5);Os02g0534400(OSCIN1);Os08g0520900(OsPHS8);Os01g0508000(Os1bglu1);Os03g0340500(SUS4);Os06g0256500(Pgi2(Pgib));Os02g0184400(OsSPS2);Os03g0212800(Os3bglu6);Os04g0474900(OsTAGG1);Os04g0309600(SUS5);Os05g0366600(Os5bglu22);Os01g0813800(Os1bglu3);Os09g0397300(-);Os03g0749500(-);Os04g0474300(Os4bglu9);Os03g0374600(-);Os02g0831500(SUS6);Os10g04…	K00700+K13679+K01193+K01193+K01214+K05350+K00695+K01810+K00696+K01188+K01188+K00695+K01188+K01188+K16055+K01188+K01188+K19892+K00695+K01177+K01810+K01176+K00696+K01194+K00695+K00844+K16055+K05349+K01188+K00703+K05350+K01188+K16055+K00975+K01188+K01188+K01188+K16055
Metabolism	Metabolism of terpenoids and polyketides	Carotenoid biosynthesis	9	38	0.158577	0.429884	ko00906	Os09g0457100(OsABA8OX3);Os02g0704000(OsNCED1);Os10g0533500(OsBCH3);Os07g0154100(OSNCED3);Os04g0578400(OsBCH2);Os04g0550600(HTD1);Os07g0282300(OsAAO3);Os03g0645900(OsNCED1);Os01g0566500(OsCCD8a)	K09843+K09840+K15746+K09840+K15746+K17912+K09842+K09840+K17913
Metabolism	Amino acid metabolism	Arginine and proline metabolism	15	70	0.162686	0.429884	ko00330	Os05g0536400(-);Os01g0760600(-);Os06g0548000(-);Os10g0550900(OsProDH);Os02g0797500(AST);Os02g0730000(OsALDH2a);Os04g0106300(OsARG);Os04g0118100(OsAMI1);Os09g0368200(PAOb);Os06g0270900(OsALDH2B1);Os09g0440300(ALDH7);Os11g0186200(OsALDH3H2);Os02g0647900(OsALDH3E2);Os02g0646500(OS-ALDH);Os03g0643300(OsOAT)	K00294+K14454+K14455+K00318+K00811+K00128+K01476+K01426+K13366+K00128+K14085+K00128+K00128+K00128+K00819
Metabolism	Amino acid metabolism	Histidine metabolism	6	23	0.162835	0.429884	ko00340	Os02g0730000(OsALDH2a);Os06g0270900(OsALDH2B1);Os09g0440300(ALDH7);Os11g0186200(OsALDH3H2);Os02g0647900(OsALDH3E2);Os02g0646500(OS-ALDH)	K00128+K00128+K14085+K00128+K00128+K00128
Metabolism	Lipid metabolism	Arachidonic acid metabolism	5	19	0.189408	0.487965	ko00590	Os01g0762000(OspPLAIValpha);Os03g0358100(OsGpx2);Os04g0556300(OsGpx1);Os01g0151500(-);Os03g0810900(OspPLAIVbeta)	K14674+K00432+K00432+K18592+K14674
Metabolism	Lipid metabolism	Steroid biosynthesis	10	45	0.192229	0.487965	ko00100	Os02g0139500(OsOSC1);Os01g0103600(-);Os01g0762000(OspPLAIValpha);Os05g0211100(CYP51G3);Os01g0211600(-);Os02g0113200(OsCYP51H5);Os01g0134500(OsSTE1);Os03g0810900(OspPLAIVbeta);Os07g0200700(-);Os09g0103100(-)	K01853+K01824+K14674+K05917+K09832+K05917+K00227+K14674+K00801+K01052
Metabolism	Global and overview maps	2-Oxocarboxylic acid metabolism	14	67	0.19903	0.490543	ko01210	Os01g0654500(-);Os01g0652600(-);Os01g0760600(-);Os04g0389800(-);Os06g0548000(-);Os02g0797500(AST);Os02g0608600(-);Os02g0657600(OsNAGK2);Os02g0194100(-);Os04g0479200(-);Os05g0129100(-);Os10g0390500(ALAAT);Os02g0232400(-);Os03g0231600(-)	K00031+K00053+K14454+K01652+K14455+K00811+K01653+K00930+K01647+K00030+K00818+K00814+K01647+K00826
Metabolism	Metabolism of cofactors and vitamins	Pantothenate and CoA biosynthesis	8	35	0.204809	0.490543	ko00770	Os01g0225400(-);Os01g0652600(-);Os02g0736400(OsDHODH1);Os04g0389800(-);Os01g0807900(-);Os02g0608600(-);Os06g0207000(-);Os03g0231600(-)	K00606+K00053+K00207+K01652+K01464+K01653+K09680+K00826
Metabolism	Amino acid metabolism	Glycine, serine and threonine metabolism	17	84	0.206168	0.490543	ko00260	Os08g0342400(-);Os08g0447000(-);Os01g0682500(-);Os06g0338200(OsDAO1);Os06g0632200(TS);Os04g0106400(-);Os08g0424500(SK2(T)(SCL);Os07g0182100(OsTSA);Os04g0464200(BAD1);Os09g0440300(ALDH7);Os12g0135051(-);Os10g0516100(OsGDCH);Os06g0338700(-);Os03g0662000(-);Os04g0107500(-);Os04g0623800(Amt);Os05g0156700(-)	K12524+K00058+K15918+K00276+K06001+K15919+K00130+K01695+K00130+K14085+K15634+K02437+K00276+K00382+K15919+K00605+K00382
Metabolism	Amino acid metabolism	Cysteine and methionine metabolism	25	129	0.208109	0.490543	ko00270	Os08g0342400(-);Os08g0447000(-);Os03g0161800(Sip2A);Os12g0625000(rcs1);Os01g0760600(-);Os09g0451000(ACO1);Os06g0345200(OsNAAT4);Os06g0548000(-);Os03g0727600(ACS1);Os11g0644800(-);Os10g0517500(RRJ1);Os06g0149900(-);Os11g0216900(OsIDI2);Os04g0669800(OsMTK);Os02g0797500(AST);Os03g0196600(-);Os02g0302200(-);Os12g0528400(-);Os12g0632700(-);Os11g0484000(OsDEP);Os09g0451400(ACO2);Os04g0551200(-);Os01g01…	K12524+K00058+K08967+K01738+K14454+K05933+K00815+K14455+K01762+K00815+K01761+K01738+K08963+K00899+K00811+K00640+K00815+K21456+K00026+K16054+K05933+K00025+K01762+K01919+K00826
Metabolism	Lipid metabolism	Fatty acid elongation	10	46	0.211998	0.490944	ko00062	Os03g0181500(ONI1);Os05g0574600(OsCHS);Os04g0271200(OsPAS2);Os06g0262800(-);Os04g0558400(-);Os04g0116600(-);Os03g0382100(-);Os02g0731900(-);Os05g0568000(KCS1);MSTRG.4776(KCS1)	K15397+K15397+K10703+K15397+K01068+K10251+K15397+K15397+K15397+K15397
Metabolism	Glycan biosynthesis and metabolism	Glycosphingolipid biosynthesis - globo and isoglobo series	3	10	0.217279	0.491615	ko00603	Os10g0492900(-);Os07g0575500(-);Os07g0679300(alpha-Gal)	K07407+K12373+K07407
Environmental Information Processing	Signal transduction	Plant hormone signal transduction	51	280	0.222394	0.491615	ko04075	Os04g0653000(EG2);Os06g0714300(OsSAUR29);Os07g0124900(OsPR1#071);Os07g0592600(GH3-8);Os01g0924966(OsSAUR3);Os03g0297600(OsPYL/RCAR4);Os04g0432000(SAPK7);Os09g0325700(PP2C1);Os01g0764800(GH3-2);Os12g0601300(OsIAA30);Os01g0846300(OsPP15);Os06g0183100(ORR2);Os01g0808100(OsbZIP08);Os01g0382400(OsPR1#012);Os12g0601400(OsIAA3);Os05g0150500(TIR1);Os01g0279900(OsbZIP03);Os02g0182100(RR24);Os03g0268600(Os…	K13464+K14488+K13449+K14487+K14488+K14496+K14498+K14497+K14487+K14484+K14497+K14491+K14431+K13449+K14484+K14485+K14431+K14491+K14497+K14488+K14490+K14489+K14496+K13422+K13449+K14484+K13449+K14484+K14502+K14498+K13946+K13449+K13464+K14500+K14490+K13449+K14486+K13463+K14491+K14496+K14497+K14431+K14431+K14431+K14432+K12126+K14496+K13449+K14516+K13463+K14431
Metabolism	Lipid metabolism	Fatty acid biosynthesis	11	52	0.223461	0.491615	ko00061	Os07g0616200(-);Os10g0363300(ACC1);Os08g0225000(ZL16);Os06g0185100(-);Os05g0317200(LACS8);Os01g0681200(-);Os05g0132100(OsLACS1);Os11g0147000(-);Os01g0655800(-);Os03g0297400(-);Os10g0456100(-)	K09458+K11262+K02372+K00059+K01897+K01897+K01897+K01897+K01897+K00645+K00059
Metabolism	Glycan biosynthesis and metabolism	Glycosphingolipid biosynthesis - ganglio series	2	6	0.256799	0.555697	ko00604	Os05g0539400(OsBgal9);Os07g0575500(-)	K12309+K12373
Metabolism	Biosynthesis of other secondary metabolites	Flavone and flavonol biosynthesis	3	11	0.264669	0.563488	ko00944	Os10g0320100(OsF3'H);Os11g0457300(UGT);Os01g0176200(-)	K05280+K22772+K22771
Metabolism	Metabolism of terpenoids and polyketides	Terpenoid backbone biosynthesis	12	60	0.27203	0.569967	ko00900	Os05g0413400(-);Os01g0802100(OsIspE);Os01g0110400(-);Os03g0197000(-);Os03g0184550(-);Os02g0680600(OsIspF);Os09g0514400(-);Os07g0580900(OsGGPPS1);Os01g0832000(CDS5);Os05g0408900(CLA1);Os07g0190000(OsDXS);Os01g0248701(-)	K01823+K00919+K00626+K11778+K15891+K01770+K05955+K13789+K15892+K01662+K01662+K13789
Metabolism	Carbohydrate metabolism	Amino sugar and nucleotide sugar metabolism	32	176	0.287894	0.582227	ko00520	Os10g0542900(Cht8);Os02g0791500(OsUGlcAE3);Os01g0860400(-);Os03g0132900(Cht11);Os07g0674100(OsUXS6);Os08g0518900(C10122);Os05g0247100(DIP3);Os01g0860500(C10501);Os11g0700900(C10923);Os03g0320100(-);Os06g0256500(Pgi2(Pgib));Os06g0726200(Cht1*(Chi1));Os04g0636100(-);Os04g0618200(-);Os12g0555600(ND1);Os11g0132600(OsWD40-181);Os11g0131900(OsARAF3);Os12g0129300(-);Os03g0776000(Pgi1(Pgia));Os04g0640700…	K20547+K08679+K01183+K20547+K08678+K01183+K01183+K01183+K01183+K01209+K01810+K20547+K13648+K12448+K00770+K01209+K01209+K01209+K01810+K15920+K13379+K00844+K01784+K12446+K13648+K20547+K01784+K01183+K12373+K01784+K00975+K08678
Metabolism	Nucleotide metabolism	Pyrimidine metabolism	13	67	0.298641	0.582227	ko00240	Os03g0378000(-);Os11g0125900(-);Os02g0736400(OsDHODH1);Os09g0567900(-);Os07g0213500(-);Os01g0654100(-);Os01g0935600(-);Os12g0123500(-);Os01g0807900(-);Os08g0248800(-);Os01g0712700(-);Os05g0573300(-);Os08g0530000(-)	K01510+K14641+K00207+K01240+K01520+K01937+K00943+K14641+K01464+K00609+K01489+K01937+K00876
Metabolism	Energy metabolism	Photosynthesis - antenna proteins	4	17	0.300254	0.582227	ko00196	Os08g0435900(cab);Os04g0457000(CP24);Os07g0558400(CP29);Os01g0720500(Lhcb1.1)	K08910+K08917+K08915+K08912
Metabolism	Biosynthesis of other secondary metabolites	Anthocyanin biosynthesis	1	2	0.301149	0.582227	ko00942	Os07g0148200(-)	K12930
Metabolism	Energy metabolism	Nitrogen metabolism	8	39	0.303157	0.582227	ko00910	Os05g0555600(OsGLT2);Os04g0543900(OsGDH2);Os01g0764900(-);Os02g0770800(OsNIA1);Os01g0558200(-);Os01g0704100(NRT2.3);Os01g0639900(BETACA1);Os02g0650900(OsGDH3)	K00264+K00261+K01455+K10534+K00262+K02575+K01673+K00261
Metabolism	Carbohydrate metabolism	Fructose and mannose metabolism	14	73	0.304346	0.582227	ko00051	Os08g0345700(OsPFPA3);Os03g0828300(-);Os03g0294200(OsF2KP2);Os10g0405600(OsPFK10);Os06g0608700(OsAld-Y);Os02g0714200(OsPFPA1);Os01g0118000(-);Os01g0866400(FR);Os06g0151900(OsPFK06);Os01g0746700(-);Os05g0187100(HXK7);Os08g0545200(OsDH1);Os07g0669100(OsXYLA1);MSTRG.2915(PFK7)	K00895+K19355+K01103+K00850+K01623+K00895+K01623+K03841+K00850+K19355+K00844+K00008+K01805+K00850
Environmental Information Processing	Membrane transport	ABC transporters	10	51	0.321013	0.598496	ko02010	Os04g0209300(OsABCC10);Os04g0459000(MDR13);Os03g0280000(OsABCB13);Os02g0190300(OsABCB9);Os05g0137100(-);Os04g0588700(OsABCC7);Os06g0184766(-);Os05g0137200(OsABCB17);Os04g0693300(-);MSTRG.2641(ABCB11)	K05665+K05658+K05658+K05658+K05658+K05665+K05674+K05658+K05681+K05658
Metabolism	Metabolism of cofactors and vitamins	Nicotinate and nicotinamide metabolism	5	23	0.321918	0.598496	ko00760	Os09g0567900(-);Os03g0834050(OsHAD1);Os04g0271000(osSRT701);Os07g0634400(-);Os01g0957000(-)	K01240+K18551+K11416+K18551+K00858
Metabolism	Carbohydrate metabolism	Ascorbate and aldarate metabolism	12	63	0.333431	0.605877	ko00053	Os12g0612100(-);Os02g0730000(OsALDH2a);Os12g0482700(-);Os08g0557600(OsMDAR4);Os08g0151800(OsMDAR5);Os06g0270900(OsALDH2B1);Os09g0440300(ALDH7);Os11g0186200(OsALDH3H2);Os04g0434800(OsAPx7);Os02g0647900(OsALDH3E2);Os06g0567200(OsAAO1);Os02g0646500(OS-ALDH)	K14190+K00128+K17744+K08232+K08232+K00128+K14085+K00128+K00434+K00128+K00423+K00128
Metabolism	Energy metabolism	Photosynthesis	17	92	0.335068	0.605877	ko00195	Os04g0473150(-);Os07g0147500(PsbR);Os02g0578400(-);Os03g0333400(-);Os03g0659266(-);Os01g0869800(PSBS1);Os03g0784700(FNR);Os01g0860601(-);Os06g0101600(OsPC);Os05g0508900(-);Os07g0105600(-);Os07g0147550(OsPsbR2);Os07g0147900(-);gene-psbA(-);gene-psaB(-);gene-psbF(-);MSTRG.3260(atpB)	K02703+K03541+K08901+K08902+K02708+K03542+K02641+K02639+K02638+K02721+K08901+K03541+K02641+K02703+K02690+K02708+K02112
Metabolism	Amino acid metabolism	Phenylalanine, tyrosine and tryptophan biosynthesis	10	54	0.391387	0.698149	ko00400	Os01g0760600(-);Os06g0345200(OsNAAT4);Os09g0565700(EIP3);Os06g0548000(-);Os06g0632200(TS);Os11g0644800(-);Os02g0797500(AST);Os02g0302200(-);Os07g0182100(OsTSA);Os03g0718000(OASB2)	K14454+K00815+K05359+K14455+K06001+K00815+K00811+K00815+K01695+K01658
Metabolism	Metabolism of cofactors and vitamins	Vitamin B6 metabolism	3	14	0.409721	0.712816	ko00750	Os10g0377800(-);Os10g0100700(OsPDX1.3b);Os12g0600400(-)	K23998+K06215+K00868
Metabolism	Energy metabolism	Oxidative phosphorylation	31	180	0.41276	0.712816	ko00190	Os01g0659200(v-ATP-E);Os01g0974800(-);Os06g0662000(PLS1);Os06g0568200(OsVHA-B);Os11g0169900(-);Os12g0168900(-);Os07g0134800(SDH1);Os01g0834200(-);Os08g0246400(-);Os05g0438500(-);Os06g0646500(-);Os04g0601700(-);Os05g0593100(-);gene-ndhD(-);gene-ndhE(-);gene-ndhG(-);gene-nad6(-);gene-atp9(-);gene-nad9(-);gene-atp6(-);gene-nad3(-);gene-nad4(-);MSTRG.11456(ndhH);MSTRG.21469(ndhB1);MSTRG.30605(ATPA);M…	K02150+K01507+K02145+K02147+K02155+K02155+K00234+K02154+K00417+K01507+K02137+K02152+K02148+K05575+K05576+K05578+K03884+K02128+K03936+K02126+K03880+K03881+K05579+K05573+K02132+K03936+K02112+K05577+K03880+K02128+K05577
Metabolism	Biosynthesis of other secondary metabolites	Aflatoxin biosynthesis	1	3	0.415809	0.712816	ko00254	Os10g0363300(ACC1)	K11262
Genetic Information Processing	Folding, sorting and degradation	SNARE interactions in vesicular transport	8	44	0.43618	0.718581	ko04130	Os03g0791500(-);Os08g0277900(-);Os01g0964000(-);Os06g0174400(OsVAMP7111);Os09g0272500(-);Os08g0307300(-);Os03g0803000(-);Os08g0440000(-)	K08517+K08503+K08516+K08515+K08507+K08517+K08515+K08495
Metabolism	Biosynthesis of other secondary metabolites	Flavonoid biosynthesis	11	62	0.43972	0.718581	ko00941	Os05g0526900(OsUGT706D2);Os10g0320100(OsF3'H);Os04g0500700(OsHCT1);Os10g0116400(-);Os01g0697100(-);Os04g0630800(-);Os05g0527000(OsUGT706C3);Os04g0103900(CHS);Os04g0101400(CYP93G1);Os04g0664600(-);Os10g0196000(-)	K22845+K05280+K13065+K22845+K22845+K08695+K22845+K00660+K23180+K13065+K09754
Genetic Information Processing	Folding, sorting and degradation	Ubiquitin mediated proteolysis	27	158	0.440258	0.718581	ko04120	Os05g0232500(OsUBC43);Os05g0104900(OsPUB66);Os05g0425700(OsFbox258);Os12g0105950(-);Os01g0271500(-);Os05g0460200(OsUBC12);Os05g0557700(LTN1);Os01g0233900(OsUBC37);Os01g0273100(OsUBC27);Os10g0456800(DCA1);Os04g0643000(OsCUL3b);Os09g0252700(-);Os04g0667800(Dhr6);Os02g0293400(SIP14);Os03g0348900(OsSRFP1);Os09g0484300(-);Os12g0594600(-);Os07g0625400(OSK28);Os03g0427900(OsPUB1);Os01g0369000(OsCUL1-1);…	K10581+K09561+K03875+K03178+K10686+K10575+K10581+K10581+K06688+K10144+K03869+K10592+K06689+K04506+K10144+K10591+K03094+K03094+K10597+K03347+K10588+K03178+K03178+K04706+K06689+K10601+K10143
Metabolism	Lipid metabolism	Synthesis and degradation of ketone bodies	2	9	0.448516	0.718581	ko00072	Os01g0110400(-);Os01g0269000(-)	K00626+K01640
Metabolism	Metabolism of other amino acids	Taurine and hypotaurine metabolism	2	9	0.448516	0.718581	ko00430	Os01g0151500(-);Os03g0236200(OsGAD3)	K18592+K01580
Metabolism	Energy metabolism	Carbon fixation in photosynthetic organisms	16	93	0.460064	0.718581	ko00710	Os01g0760600(-);Os06g0608700(OsAld-Y);Os01g0118000(-);Os06g0548000(-);Os01g0866400(FR);Os06g0668200(PGK);Os04g0306400(OsRPI);Os12g0632700(-);Os12g0292400(RBCS);Os04g0551200(-);Os12g0274700(RBCS);Os01g0723400(NADP-ME2);Os10g0390500(ALAAT);Os05g0186300(OscytME2);Os08g0126300(OsGapC3);MSTRG.16908(TIC214)	K14454+K01623+K01623+K14455+K03841+K00927+K01807+K00026+K01602+K00025+K01602+K00029+K00814+K00029+K00134+K01601
Metabolism	Lipid metabolism	Ether lipid metabolism	6	33	0.46238	0.718581	ko00565	Os03g0826600(NPC1);Os01g0762000(OspPLAIValpha);Os05g0171000(OsPLDalpha2);Os01g0172400(OsPLDalpha1);Os03g0810900(OspPLAIVbeta);Os03g0852800(OsNPC3)	K01114+K14674+K01115+K01115+K14674+K01114
Organismal Systems	Environmental adaptation	Circadian rhythm - plant	9	51	0.462722	0.718581	ko04712	Os03g0309200(PHYB);Os11g0547000(FKF1);Os03g0719800(PHYA);Os03g0762000(HD6);Os06g0552900(OsFTL12);Os01g0182600(GI);Os04g0103900(CHS);Os01g0286100(PIL15);MSTRG.10139(RUP1)	K12121+K12116+K12120+K03097+K16223+K12124+K00660+K12126+K10143
Metabolism	Glycan biosynthesis and metabolism	Various types of N-glycan biosynthesis	6	34	0.493107	0.742207	ko00513	Os12g0170600(-);Os06g0229200(-);Os06g0245700(-);Os05g0209100(-);Os04g0606400(-);Os07g0575500(-)	K14412+K14413+K01231+K23741+K01230+K12373
Metabolism	Metabolism of cofactors and vitamins	Folate biosynthesis	6	34	0.493107	0.742207	ko00790	Os02g0572400(-);Os01g0238500(-);Os02g0273100(-);Os05g0517500(-);Os05g0244700(OsAT-IV);Os08g0556200(-)	K14652+K18482+K18482+K01307+K18482+K01633
Metabolism	Metabolism of cofactors and vitamins	Biotin metabolism	4	22	0.498279	0.742207	ko00780	Os07g0616200(-);Os08g0225000(ZL16);Os06g0185100(-);Os10g0456100(-)	K09458+K02372+K00059+K00059
Metabolism	Carbohydrate metabolism	C5-Branched dibasic acid metabolism	2	10	0.506326	0.742207	ko00660	Os04g0389800(-);Os02g0608600(-)	K01652+K01653
Metabolism	Metabolism of terpenoids and polyketides	Monoterpenoid biosynthesis	2	10	0.506326	0.742207	ko00902	Os04g0531900(-);Os04g0532400(-)	K15095+K15095
Metabolism	Biosynthesis of other secondary metabolites	Indole alkaloid biosynthesis	1	4	0.511673	0.742207	ko00901	Os08g0140300(TDC1)	K01593
Metabolism	Lipid metabolism	Cutin, suberine and wax biosynthesis	6	35	0.523225	0.750714	ko00073	Os02g0734400(-);Os11g0507200(-);Os02g0621300(OsCER1);Os10g0486100(-);Os08g0557800(-);Os04g0511200(EFA27)	K17991+K15400+K15404+K15402+K13356+K17991
Metabolism	Metabolism of cofactors and vitamins	Thiamine metabolism	4	23	0.535408	0.75679	ko00730	Os03g0306900(-);Os12g0236400(ADK-A);Os05g0408900(CLA1);Os07g0190000(OsDXS)	K20896+K00939+K01662+K01662
Environmental Information Processing	Signal transduction	Phosphatidylinositol signaling system	14	85	0.539045	0.75679	ko04070	Os03g0425300(-);Os03g0310800(-);Os12g0562400(OsPLC3);Os08g0556700(-);Os05g0180600(-);Os06g0259000(-);Os02g0554300(-);Os01g0783200(-);Os12g0236700(-);Os12g0576900(-);Os02g0123600(-);Os02g0466400(OsITPK4);Os08g0428900(-);Os01g0279300(OsCaM3)	K00901+K02183+K05857+K18081+K00914+K00921+K21797+K00901+K00921+K00901+K00999+K00913+K00921+K02183
Metabolism	Metabolism of terpenoids and polyketides	Zeatin biosynthesis	7	42	0.546141	0.75679	ko00908	Os10g0483500(OsCKX3);Os04g0523500(OsCKX8);Os04g0556400(-);Os05g0311801(-);Os01g0968700(OsIPT9);Os05g0551700(OsIPT7);Os08g0460600(OsCKX11)	K00279+K00279+K13495+K10760+K00791+K10760+K00279
Cellular Processes	Transport and catabolism	Endocytosis	28	172	0.550392	0.75679	ko04144	Os02g0437800(-);Os02g0235000(-);Os03g0843100(OsRab11A1);Os01g0862300(-);Os01g0738600(-);Os09g0327100(OsRab11C2);Os07g0195100(OsRab8B1);Os01g0227300(OsRab7B1);Os05g0171000(OsPLDalpha2);Os02g0198300(-);Os05g0516600(OsRab7B3);Os11g0629200(-);Os02g0806600(-);Os01g0840100(OsMed37_1);Os07g0239400(OsRab8A3);Os05g0461300(OsRab8A2);Os07g0563800(-);Os01g0687700(-);Os03g0801600(-);Os09g0527600(OsRab11F2);Os…	K12479+K05756+K07904+K17917+K12471+K07904+K07901+K07897+K01115+K12486+K07897+K18466+K12471+K03283+K07901+K07901+K12486+K19476+K18468+K07904+K01115+K12483+K10591+K19476+K11866+K11826+K03283+K03283
Metabolism	Glycan biosynthesis and metabolism	Other types of O-glycan biosynthesis	2	11	0.560027	0.762099	ko00514	Os07g0587100(-);Os08g0559300(SPY)	K20783+K09667
Metabolism	Amino acid metabolism	Valine, leucine and isoleucine biosynthesis	4	24	0.571105	0.769243	ko00290	Os01g0652600(-);Os04g0389800(-);Os02g0608600(-);Os03g0231600(-)	K00053+K01652+K01653+K00826
Metabolism	Glycan biosynthesis and metabolism	Other glycan degradation	3	18	0.585844	0.781126	ko00511	Os05g0539400(OsBgal9);Os10g0140200(-);Os07g0575500(-)	K12309+K01191+K12373
Metabolism	Nucleotide metabolism	Purine metabolism	17	107	0.598561	0.7901	ko00230	Os07g0613000(-);Os03g0378000(-);Os03g0429800(-);Os11g0125900(-);Os09g0442600(-);Os05g0161500(-);Os12g0123500(-);Os01g0865100(-);Os09g0553300(-);Os11g0216000(-);Os12g0597500(OsUAH);Os12g0236400(ADK-A);Os05g0430800(-);Os04g0518000(-);Os08g0557200(-);Os01g0873100(-);Os07g0693500(-)	K00951+K01510+K00106+K14641+K00951+K00951+K14641+K00365+K18453+K00873+K18151+K00939+K00764+K00856+K01517+K00764+K01490
Metabolism	Biosynthesis of other secondary metabolites	Betalain biosynthesis	1	6	0.658824	0.854468	ko00965	Os08g0140300(TDC1)	K01593
Metabolism	Metabolism of cofactors and vitamins	Riboflavin metabolism	3	20	0.660271	0.854468	ko00740	Os02g0572400(-);Os04g0557000(-);Os09g0553300(-)	K14652+K22912+K18453
Metabolism	Biosynthesis of other secondary metabolites	Stilbenoid, diarylheptanoid and gingerol biosynthesis	4	28	0.697017	0.893265	ko00945	Os04g0500700(OsHCT1);Os11g0303600(OMT);Os04g0664600(-);Os10g0196000(-)	K13065+K16040+K13065+K09754
Organismal Systems	Environmental adaptation	Plant-pathogen interaction	45	292	0.704835	0.894598	ko04626	Os01g0505600(OsCML11);Os03g0181500(ONI1);Os07g0186500(-);Os07g0124900(OsPR1#071);Os03g0758300(OsCNGC7);Os04g0618700(Os-FLS2);Os09g0392100(OsEDS1);Os03g0310800(-);Os05g0474800(OsWRKY70);Os05g0574600(OsCHS);Os01g0382400(OsPR1#012);Os02g0126400(CDPK4);Os04g0647800(-);Os12g0137100(OsCBP);Os09g0511000(OsLysM-RLK10);Os06g0262800(-);Os01g0955100(OsCML31);Os04g0514600(-);Os07g0129200(PR1A);Os11g0559200(X…	K13448+K15397+K13457+K13449+K05391+K13420+K18875+K02183+K13424+K15397+K13449+K13412+K00864+K13448+K13429+K15397+K13448+K13459+K13449+K13437+K13448+K13412+K13437+K13449+K13457+K13449+K13457+K13447+K15397+K13448+K13457+K13448+K13456+K15397+K13449+K13457+K18835+K02183+K13448+K01373+K13449+K13457+K15397+K13448+K15397
Metabolism	Global and overview maps	Biosynthesis of amino acids	41	269	0.725493	0.912048	ko01230	Os08g0342400(-);Os01g0654500(-);Os08g0447000(-);Os01g0652600(-);Os12g0625000(rcs1);Os01g0760600(-);Os03g0291500(ASN1);Os04g0389800(-);Os10g0405600(OsPFK10);Os06g0345200(OsNAAT4);Os06g0608700(OsAld-Y);Os09g0565700(EIP3);Os05g0555600(OsGLT2);Os01g0118000(-);Os06g0548000(-);Os06g0632200(TS);Os11g0644800(-);Os06g0149900(-);Os02g0797500(AST);Os06g0151900(OsPFK06);Os04g0106300(OsARG);Os03g0196600(-);Os…	K12524+K00031+K00058+K00053+K01738+K14454+K01953+K01652+K00850+K00815+K01623+K05359+K00264+K01623+K14455+K06001+K00815+K01738+K00811+K00850+K01476+K00640+K00815+K00616+K01695+K01653+K01658+K00930+K01647+K00927+K01807+K00873+K00030+K15634+K00818+K00814+K00134+K01647+K01689+K00826+K00850
Metabolism	Metabolism of other amino acids	Phosphonate and phosphinate metabolism	1	9	0.800809	0.988328	ko00440	Os10g0387000(-)	K00967
Genetic Information Processing	Folding, sorting and degradation	Protein export	8	61	0.805592	0.988328	ko03060	Os05g0509500(-);Os06g0342100(SRP19);Os02g0178400(-);Os03g0844700(-);Os03g0147900(-);Os06g0273800(OsSigP5);Os02g0435000(OsNSCC2);Os01g0772800(-)	K03106+K03105+K07342+K03217+K09648+K13280+K12275+K03106
Metabolism	Energy metabolism	Sulfur metabolism	5	40	0.808632	0.988328	ko00920	Os12g0625000(rcs1);Os01g0667200(GLYII-1);Os06g0149900(-);Os03g0196600(-);Os07g0558300(-)	K01738+K17725+K01738+K00640+K01082
Metabolism	Biosynthesis of other secondary metabolites	Glucosinolate biosynthesis	1	10	0.833529	1	ko00966	Os03g0231600(-)	K00826
Metabolism	Glycan biosynthesis and metabolism	N-Glycan biosynthesis	5	43	0.856399	1	ko00510	Os04g0576800(-);Os03g0824400(-);Os06g0245700(-);Os05g0209100(-);Os04g0606400(-)	K12345+K00721+K01231+K23741+K01230
Metabolism	Glycan biosynthesis and metabolism	Glycosylphosphatidylinositol(GPI)-anchor biosynthesis	3	28	0.861087	1	ko00563	Os01g0580100(-);Os03g0670200(-);Os02g0781600(-)	K05286+K05284+K05310
Genetic Information Processing	Folding, sorting and degradation	RNA degradation	17	128	0.862302	1	ko03018	Os09g0252000(-);Os10g0405600(OsPFK10);Os04g0613400(-);Os06g0151900(OsPFK06);Os12g0102400(OsRINGC2-2);Os11g0102800(OsRINGC2-1);Os02g0517300(-);Os10g0503700(OsRH12);Os04g0504800(OsPABPC3);Os10g0471350(-);Os07g0249600(-);Os03g0113700(OsISC24);Os04g0533000(OsRH6);Os08g0440300(OsCAF1A);Os03g0248600(OsEno2);Os03g0652100(-);MSTRG.2915(PFK7)	K11600+K00850+K12606+K00850+K10643+K10643+K12617+K12614+K13126+K14442+K12611+K04043+K12614+K12581+K01689+K12580+K00850
Genetic Information Processing	Folding, sorting and degradation	Protein processing in endoplasmic reticulum	33	236	0.868489	1	ko04141	Os02g0181800(-);Os01g0102700(-);Os08g0430200(RAD23);Os05g0104900(OsPUB66);Os12g0636000(OsRDCP5);Os11g0433500(Sec23c);Os03g0822700(-);Os01g0276800(Gas2);Os04g0549600(OsDjA6);Os02g0178400(-);Os05g0460200(OsUBC12);Os02g0656500(OsDjA1);Os01g0773600(-);Os01g0840100(OsMed37_1);Os07g0123700(OsWD40-136);Os03g0648400(OsDjA4);Os04g0667800(Dhr6);Os12g0594600(-);Os06g0644800(OsOS-9);Os07g0625400(OSK28);Os03g…	K14016+K13250+K10839+K09561+K10666+K14006+K09562+K08288+K09503+K07342+K10575+K09503+K10085+K03283+K14018+K09503+K06689+K03094+K10088+K03094+K10597+K03347+K23741+K14005+K01230+K14003+K12275+K13993+K06689+K03283+K10601+K03283+K10661
Metabolism	Metabolism of other amino acids	Selenocompound metabolism	2	22	0.897167	1	ko00450	Os10g0517500(RRJ1);Os05g0105000(-)	K01761+K08247
Metabolism	Biosynthesis of other secondary metabolites	Monobactam biosynthesis	1	13	0.902848	1	ko00261	Os08g0342400(-)	K12524
Genetic Information Processing	Translation	Aminoacyl-tRNA biosynthesis	7	64	0.918929	1	ko00970	Os05g0163000(-);Os06g0103600(-);Os03g0111700(-);Os10g0506200(OsValRS3);Os05g0241100(-);Os03g0694900(OsValRS1);Os02g0623500(-)	K01887+K14164+K01873+K01873+K01869+K01873+K04567
Metabolism	Amino acid metabolism	Lysine biosynthesis	1	15	0.932164	1	ko00300	Os08g0342400(-)	K12524
Genetic Information Processing	Translation	mRNA surveillance pathway	14	124	0.958612	1	ko03015	Os08g0187700(-);Os08g0427900(-);Os07g0693900(-);Os06g0319600(-);Os10g0470900(RBPJ);Os05g0373900(-);Os02g0191700(-);Os02g0780600(-);Os03g0268000(OsPP1);Os04g0504800(OsPABPC3);Os01g0600200(-);Os07g0626200(-);Os03g0167700(OsPP44);Os07g0495900(-)	K14400+K12881+K06100+K14376+K14411+K03265+K11583+K00565+K06269+K13126+K04354+K12875+K04382+K14326
Metabolism	Metabolism of cofactors and vitamins	One carbon pool by folate	1	19	0.966941	1	ko00670	Os04g0623800(Amt)	K00605
Metabolism	Carbohydrate metabolism	Pentose and glucuronate interconversions	8	82	0.970048	1	ko00040	Os01g0847800(AKR3);Os04g0137201(OsPLL4.2);Os05g0361500(OsPME17);Os01g0788400(OsPME6);Os07g0640200(-);Os08g0545200(OsDH1);Os06g0583900(-);Os07g0669100(OsXYLA1)	K00002+K01728+K01051+K01051+K00854+K00008+K01728+K01805
Genetic Information Processing	Transcription	Basal transcription factors	5	60	0.9777	1	ko03022	Os07g0205200(-);Os01g0858500(-);Os10g0397200(-);Os03g0251800(-);Os08g0343300(-)	K03130+K03126+K03137+K03138+K03136
Genetic Information Processing	Folding, sorting and degradation	Proteasome	4	66	0.996883	1	ko03050	Os09g0326800(OsRpn1a);Os03g0851300(OsRpn5);Os07g0435100(OSRPN12);Os03g0214600(OsRpn9b)	K03028+K03035+K03031+K03039
Genetic Information Processing	Translation	RNA transport	19	197	0.997936	1	ko03013	Os08g0427900(-);Os08g0176800(OsWD40-156);Os12g0131300(-);Os07g0685400(-);Os06g0338900(-);Os11g0132700(-);Os01g0918200(-);Os07g0529800(GOS2);Os07g0167000(eIF-3e);Os09g0565450(-);Os01g0232400(-);Os12g0165900(OsNucAP2);Os12g0101000(OsCCT39);Os04g0504800(OsPABPC3);Os07g0626200(-);Os07g0555200(eIF4Gtsv1);Os07g0495900(-);Os11g0518900(-);Os03g0143800(LPL2)	K12881+K14298+K14320+K14317+K03241+K14320+K12160+K03113+K03250+K14314+K00784+K14297+K03539+K13126+K12875+K03260+K14326+K14289+K05749
Genetic Information Processing	Transcription	Spliceosome	21	216	0.998478	1	ko03040	Os05g0364600(-);Os08g0427900(-);Os09g0407900(-);Os01g0316600(-);Os07g0633200(-);Os06g0566100(-);Os09g0491756(OsC3H60);Os10g0115600(U1-70K);Os06g0343100(-);Os01g0956600(-);Os02g0122800(-);Os01g0840100(OsMed37_1);Os01g0876500(-);Os06g0167000(-);Os07g0141600(-);Os11g0704700(-);Os03g0314100(PRP-22);Os07g0626200(-);Os05g0460000(OsctHSP70-1);Os03g0277300(HSP70);MSTRG.11674(--)	K12890+K12881+K12847+K12890+K12900+K12741+K12836+K11093+K12818+K12837+K12893+K03283+K12831+K12856+K12844+K12900+K12820+K12875+K03283+K03283+K11984
Genetic Information Processing	Replication and repair	Base excision repair	2	52	0.999027	1	ko03410	Os12g0212100(-);Os02g0530600(OsEnS-38)	K03575+K10798
Genetic Information Processing	Transcription	RNA polymerase	2	63	0.999841	1	ko03020	Os09g0110400(-);MSTRG.21456(rpoA)	K03011+K03040
Genetic Information Processing	Replication and repair	Mismatch repair	1	55	0.99995	1	ko03430	Os05g0274200(-)	K08735
Genetic Information Processing	Replication and repair	DNA replication	2	71	0.999958	1	ko03030	Os01g0544450(OsMCM4);Os02g0797400(OsMCM5)	K02212+K02209
Genetic Information Processing	Translation	Ribosome biogenesis in eukaryotes	4	99	0.999975	1	ko03008	Os04g0576300(OsSTA131);Os03g0762000(HD6);Os03g0352400(OsNug2);Os12g0101000(OsCCT39)	K11131+K03097+K14537+K03539
Genetic Information Processing	Replication and repair	Nucleotide excision repair	2	86	0.999997	1	ko03420	Os08g0430200(RAD23);Os03g0100400(XPF)	K10839+K10848
Genetic Information Processing	Replication and repair	Homologous recombination	2	86	0.999997	1	ko03440	Os04g0648700(EME1);Os05g0486600(BARD1)	K10882+K10683
Genetic Information Processing	Translation	Ribosome	19	359	1	1	ko03010	Os08g0234000(-);Os03g0579300(-);Os06g0181566(-);Os03g0755700(-);Os03g0315800(-);gene-rps2(-);gene-rps18(-);gene-rpl22(-);gene-rp12(-);gene-rpl2(-);gene-rps7-3(-);gene-rps4(-);gene-rps19-2(-);gene-rps2-2(-);MSTRG.26724(rpl2-A);MSTRG.27933(rpl22);MSTRG.31133(rpl2-A);MSTRG.8796(rpl14);MSTRG.9479(RPS2)	K02937+K02885+K02924+K02872+K02945+K02967+K02963+K02890+K02886+K02886+K02992+K02986+K02965+K02967+K02886+K02890+K02886+K02874+K02967

## Sheet: zj-esb-vs-zj-esc
All enrichment pathways of mRNAs of the comparison between zj-esb and zj-esc.
KEGG_A_class	KEGG_B_class	Pathway	Pir1b-vs-Pir1c (76)	All (5841)	Pvalue	Qvalue	Pathway ID	Genes	K_IDs
Metabolism	Global and overview maps	Biosynthesis of secondary metabolites	38	1549	9.33083e-06	0.000653158	ko01110	Os07g0162100(-);Os03g0181500(ONI1);Os04g0664900(OsCIN5);Os05g0102000(OsJMT1);Os10g0563700(-);Os01g0209700(OsGA2ox7);Os04g0650700(OsASNase2);Os02g0218700(HPL2);Os05g0574600(OsCHS);Os01g0508000(Os1bglu1);Os05g0555600(OsGLT2);Os03g0654600(NOL);Os05g0211100(CYP51G3);Os04g0688500(prx62);Os01g0855000(GPAT);Os12g0626400(PSY2);Os07g0154100(OSNCED3);Os04g0531900(-);Os07g0656200(Os7bglu26);Os01g0848200(P5C…	K10258+K15397+K01193+K08241+K00940+K04125+K13051+K01723+K15397+K05350+K00264+K13606+K05917+K00430+K13508+K02291+K09840+K15095+K05350+K12657+K09753+K21568+K00827+K00430+K13029+K22013+K10528+K01904+K04122+K15397+K02437+K05350+K01602+K00430+K00430+K12153+K00128+K17913
Metabolism	Metabolism of other amino acids	Cyanoamino acid metabolism	7	67	2.22186e-05	0.00077765	ko00460	Os04g0650700(OsASNase2);Os01g0508000(Os1bglu1);Os07g0656200(Os7bglu26);Os12g0512800(OsCYP71E5);Os01g0151500(-);Os03g0703000(Os3bglu7);Os04g0171800(-)	K13051+K05350+K05350+K13029+K18592+K05350+K12153
Metabolism	Metabolism of terpenoids and polyketides	Carotenoid biosynthesis	4	38	0.00139742	0.0326066	ko00906	Os09g0457100(OsABA8OX3);Os12g0626400(PSY2);Os07g0154100(OSNCED3);Os01g0566500(OsCCD8a)	K09843+K02291+K09840+K17913
Metabolism	Lipid metabolism	Fatty acid elongation	4	46	0.00285621	0.0499837	ko00062	Os07g0162100(-);Os03g0181500(ONI1);Os05g0574600(OsCHS);Os02g0731900(-)	K10258+K15397+K15397+K15397
Metabolism	Biosynthesis of other secondary metabolites	Phenylpropanoid biosynthesis	9	266	0.00721375	0.100992	ko00940	Os01g0508000(Os1bglu1);Os04g0688500(prx62);Os07g0656200(Os7bglu26);Os09g0127300(OsCCR17);Os07g0677500(POX3006);Os01g0901600(OsACS6);Os03g0703000(Os3bglu7);Os11g0112200(PRX131);Os07g0677200(POX22.3)	K05350+K00430+K05350+K09753+K00430+K01904+K05350+K00430+K00430
Organismal Systems	Environmental adaptation	Plant-pathogen interaction	8	292	0.0349631	0.346054	ko04626	Os03g0181500(ONI1);Os05g0474800(OsWRKY70);Os05g0574600(OsCHS);Os02g0126400(CDPK4);Os05g0528000(rbohC);Os04g0514600(-);Os01g0360200(RBOHB);Os02g0731900(-)	K15397+K13424+K15397+K13412+K13447+K13459+K13447+K15397
Metabolism	Biosynthesis of other secondary metabolites	Benzoxazinoid biosynthesis	1	3	0.0385352	0.346054	ko00402	Os03g0797400(OsIGL)	K13222
Metabolism	Amino acid metabolism	Alanine, aspartate and glutamate metabolism	3	59	0.04093	0.346054	ko00250	Os04g0650700(OsASNase2);Os05g0555600(OsGLT2);Os03g0171900(-)	K13051+K00264+K00827
Metabolism	Lipid metabolism	alpha-Linolenic acid metabolism	3	61	0.0444926	0.346054	ko00592	Os05g0102000(OsJMT1);Os02g0218700(HPL2);Os02g0110200(HPL3)	K08241+K01723+K10528
Metabolism	Biosynthesis of other secondary metabolites	Biosynthesis of various secondary metabolites - part 2	1	4	0.0510517	0.357362	ko00998	Os12g0263600(-)	K21568
Environmental Information Processing	Signal transduction	MAPK signaling pathway - plant	6	212	0.0568319	0.361657	ko04016	Os04g0556000(HMA5);Os10g0563700(-);Os05g0474800(OsWRKY70);Os05g0528000(rbohC);Os01g0360200(RBOHB);Os01g0699600(OsNPK1-PK)	K17686+K00940+K13424+K13447+K13447+K20716
Metabolism	Amino acid metabolism	Tryptophan metabolism	3	81	0.08798	0.49566	ko00380	Os04g0475600(-);Os09g0344500(ZRP4);Os02g0646500(OS-ALDH)	K23947+K22588+K00128
Metabolism	Global and overview maps	Metabolic pathways	42	2748	0.0920512	0.49566	ko01100	Os07g0162100(-);Os03g0181500(ONI1);Os04g0664900(OsCIN5);Os04g0608100(GalK2);Os03g0797400(OsIGL);Os10g0563700(-);Os04g0650700(OsASNase2);Os01g0860500(C10501);Os02g0218700(HPL2);Os05g0574600(OsCHS);Os01g0508000(Os1bglu1);Os05g0555600(OsGLT2);Os03g0654600(NOL);Os05g0211100(CYP51G3);Os09g0344500(ZRP4);Os03g0808900(-);Os04g0688500(prx62);Os07g0485100(-);Os01g0855000(GPAT);Os12g0626400(PSY2);Os07g01541…	K10258+K15397+K01193+K18677+K13222+K00940+K13051+K01183+K01723+K15397+K05350+K00264+K13606+K05917+K22588+K06617+K00430+K01431+K13508+K02291+K09840+K05350+K12657+K09753+K00827+K00430+K13029+K18592+K01904+K04122+K05285+K03146+K15397+K02437+K05350+K01602+K01759+K00430+K00430+K12153+K00128+K09458
Metabolism	Metabolism of other amino acids	Taurine and hypotaurine metabolism	1	9	0.111262	0.50324	ko00430	Os01g0151500(-)	K18592
Metabolism	Metabolism of terpenoids and polyketides	Limonene and pinene degradation	1	9	0.111262	0.50324	ko00903	Os02g0646500(OS-ALDH)	K00128
Metabolism	Metabolism of terpenoids and polyketides	Monoterpenoid biosynthesis	1	10	0.122844	0.50324	ko00902	Os04g0531900(-)	K15095
Metabolism	Biosynthesis of other secondary metabolites	Glucosinolate biosynthesis	1	10	0.122844	0.50324	ko00966	Os04g0171800(-)	K12153
Metabolism	Metabolism of other amino acids	beta-Alanine metabolism	2	49	0.133071	0.50324	ko00410	Os07g0485100(-);Os02g0646500(OS-ALDH)	K01431+K00128
Metabolism	Amino acid metabolism	Valine, leucine and isoleucine degradation	2	52	0.146451	0.50324	ko00280	Os03g0171900(-);Os02g0646500(OS-ALDH)	K00827+K00128
Metabolism	Metabolism of cofactors and vitamins	Porphyrin and chlorophyll metabolism	2	52	0.146451	0.50324	ko00860	Os03g0654600(NOL);Os09g0532000(SGR)	K13606+K22013
Metabolism	Metabolism of terpenoids and polyketides	Diterpenoid biosynthesis	2	53	0.150972	0.50324	ko00904	Os01g0209700(OsGA2ox7);Os06g0568600(OsKO5)	K04125+K04122
Metabolism	Metabolism of cofactors and vitamins	Vitamin B6 metabolism	1	14	0.1677	0.533589	ko00750	Os10g0100700(OsPDX1.3b)	K06215
Metabolism	Glycan biosynthesis and metabolism	Other glycan degradation	1	18	0.21029	0.552606	ko00511	Os05g0346500(-)	K01227
Metabolism	Carbohydrate metabolism	Galactose metabolism	2	67	0.216588	0.552606	ko00052	Os04g0664900(OsCIN5);Os03g0808900(-)	K01193+K06617
Metabolism	Nucleotide metabolism	Pyrimidine metabolism	2	67	0.216588	0.552606	ko00240	Os10g0563700(-);Os07g0485100(-)	K00940+K01431
Metabolism	Lipid metabolism	Arachidonic acid metabolism	1	19	0.220597	0.552606	ko00590	Os01g0151500(-)	K18592
Metabolism	Metabolism of terpenoids and polyketides	Sesquiterpenoid and triterpenoid biosynthesis	1	20	0.230771	0.552606	ko00909	Os08g0139700(OsTPS29)	K15803
Metabolism	Amino acid metabolism	Arginine and proline metabolism	2	70	0.23102	0.552606	ko00330	Os01g0848200(P5CS2);Os02g0646500(OS-ALDH)	K12657+K00128
Metabolism	Metabolism of cofactors and vitamins	Biotin metabolism	1	22	0.250728	0.552606	ko00780	Os04g0445700(-)	K09458
Metabolism	Carbohydrate metabolism	Starch and sucrose metabolism	4	197	0.253689	0.552606	ko00500	Os04g0664900(OsCIN5);Os01g0508000(Os1bglu1);Os07g0656200(Os7bglu26);Os03g0703000(Os3bglu7)	K01193+K05350+K05350+K05350
Metabolism	Amino acid metabolism	Histidine metabolism	1	23	0.260514	0.552606	ko00340	Os02g0646500(OS-ALDH)	K00128
Metabolism	Metabolism of cofactors and vitamins	Thiamine metabolism	1	23	0.260514	0.552606	ko00730	Os07g0529600(OsDR8)	K03146
Metabolism	Metabolism of cofactors and vitamins	Nicotinate and nicotinamide metabolism	1	23	0.260514	0.552606	ko00760	Os03g0834050(OsHAD1)	K18551
Metabolism	Amino acid metabolism	Glycine, serine and threonine metabolism	2	84	0.298821	0.614252	ko00260	Os03g0171900(-);Os10g0516100(OsGDCH)	K00827+K02437
Metabolism	Glycan biosynthesis and metabolism	Glycosylphosphatidylinositol(GPI)-anchor biosynthesis	1	28	0.307584	0.614252	ko00563	Os02g0581000(-)	K05285
Metabolism	Global and overview maps	Fatty acid metabolism	2	91	0.332518	0.614252	ko01212	Os07g0162100(-);Os04g0445700(-)	K10258+K09458
Metabolism	Carbohydrate metabolism	Glyoxylate and dicarboxylate metabolism	2	92	0.3373	0.614252	ko00630	Os10g0516100(OsGDCH);Os12g0274700(RBCS)	K02437+K01602
Metabolism	Lipid metabolism	Glycerolipid metabolism	2	95	0.351586	0.614252	ko00561	Os01g0855000(GPAT);Os02g0646500(OS-ALDH)	K13508+K00128
Metabolism	Carbohydrate metabolism	Pyruvate metabolism	2	95	0.351586	0.614252	ko00620	Os02g0280500(OsGLYI2);Os02g0646500(OS-ALDH)	K01759+K00128
Metabolism	Metabolism of cofactors and vitamins	Folate biosynthesis	1	34	0.360177	0.614252	ko00790	Os01g0238500(-)	K18482
Metabolism	Lipid metabolism	Cutin, suberine and wax biosynthesis	1	35	0.368551	0.614252	ko00073	Os08g0557800(-)	K13356
Metabolism	Metabolism of cofactors and vitamins	Pantothenate and CoA biosynthesis	1	35	0.368551	0.614252	ko00770	Os07g0485100(-)	K01431
Metabolism	Energy metabolism	Nitrogen metabolism	1	39	0.400978	0.652755	ko00910	Os05g0555600(OsGLT2)	K00264
Metabolism	Lipid metabolism	Biosynthesis of unsaturated fatty acids	1	41	0.41657	0.662725	ko01040	Os07g0162100(-)	K10258
Metabolism	Lipid metabolism	Steroid biosynthesis	1	45	0.446562	0.694651	ko00100	Os05g0211100(CYP51G3)	K05917
Metabolism	Amino acid metabolism	Lysine degradation	1	50	0.481919	0.707756	ko00310	Os02g0646500(OS-ALDH)	K00128
Environmental Information Processing	Membrane transport	ABC transporters	1	51	0.488718	0.707756	ko02010	Os04g0588700(OsABCC7)	K05665
Organismal Systems	Environmental adaptation	Circadian rhythm - plant	1	51	0.488718	0.707756	ko04712	Os06g0552900(OsFTL12)	K16223
Metabolism	Lipid metabolism	Fatty acid biosynthesis	1	52	0.495429	0.707756	ko00061	Os04g0445700(-)	K09458
Metabolism	Lipid metabolism	Fatty acid degradation	1	54	0.508592	0.712029	ko00071	Os02g0646500(OS-ALDH)	K00128
Metabolism	Metabolism of cofactors and vitamins	Ubiquinone and other terpenoid-quinone biosynthesis	1	58	0.533909	0.732816	ko00130	Os01g0901600(OsACS6)	K01904
Metabolism	Carbohydrate metabolism	Ascorbate and aldarate metabolism	1	63	0.563751	0.758896	ko00053	Os02g0646500(OS-ALDH)	K00128
Metabolism	Global and overview maps	2-Oxocarboxylic acid metabolism	1	67	0.58626	0.774306	ko01210	Os04g0171800(-)	K12153
Genetic Information Processing	Folding, sorting and degradation	Ubiquitin mediated proteolysis	2	158	0.614495	0.796568	ko04120	Os03g0145900(-);Os03g0348900(OsSRFP1)	K10144+K10144
Metabolism	Carbohydrate metabolism	Amino sugar and nucleotide sugar metabolism	2	176	0.673346	0.856986	ko00520	Os04g0608100(GalK2);Os01g0860500(C10501)	K18677+K01183
Metabolism	Energy metabolism	Photosynthesis	1	92	0.70313	0.868312	ko00195	Os01g0869800(PSBS1)	K03542
Metabolism	Energy metabolism	Carbon fixation in photosynthetic organisms	1	93	0.707054	0.868312	ko00710	Os12g0274700(RBCS)	K01602
Cellular Processes	Transport and catabolism	Peroxisome	1	102	0.740148	0.893282	ko04146	Os08g0557800(-)	K13356
Metabolism	Nucleotide metabolism	Purine metabolism	1	107	0.75691	0.898028	ko00230	Os10g0563700(-)	K00940
Genetic Information Processing	Translation	mRNA surveillance pathway	1	124	0.806305	0.903418	ko03015	MSTRG.6004(B'ALPHA)	K11584
Metabolism	Lipid metabolism	Glycerophospholipid metabolism	1	128	0.816404	0.903418	ko00564	Os01g0855000(GPAT)	K13508
Genetic Information Processing	Folding, sorting and degradation	RNA degradation	1	128	0.816404	0.903418	ko03018	Os04g0684900(OsCAF1B)	K12581
Metabolism	Amino acid metabolism	Cysteine and methionine metabolism	1	129	0.818846	0.903418	ko00270	Os03g0171900(-)	K00827
Metabolism	Metabolism of other amino acids	Glutathione metabolism	1	132	0.825982	0.903418	ko00480	Os01g0151500(-)	K18592
Genetic Information Processing	Translation	Ribosome	3	359	0.855053	0.920827	ko03010	Os01g0231700(-);gene-rpl22(-);MSTRG.27933(rpl22)	K02942+K02890+K02890
Metabolism	Global and overview maps	Biosynthesis of amino acids	2	269	0.871957	0.921633	ko01230	Os05g0555600(OsGLT2);Os01g0848200(P5CS2)	K00264+K12657
Metabolism	Carbohydrate metabolism	Glycolysis / Gluconeogenesis	1	161	0.882135	0.921633	ko00010	Os02g0646500(OS-ALDH)	K00128
Metabolism	Global and overview maps	Carbon metabolism	2	307	0.915232	0.942151	ko01200	Os10g0516100(OsGDCH);Os12g0274700(RBCS)	K02437+K01602
Genetic Information Processing	Folding, sorting and degradation	Protein processing in endoplasmic reticulum	1	236	0.95737	0.971245	ko04141	Os03g0787300(OsDjA5)	K09503
Environmental Information Processing	Signal transduction	Plant hormone signal transduction	1	280	0.976675	0.976675	ko04075	Os06g0696600(OsXTH12)	K14504

## Sheet:  ZJ22a-vs-ZJ22b
All enrichment pathways of mRNAs of the comparison between ZJ22a and ZJ22b.
KEGG_A_class	KEGG_B_class	Pathway	ZJ22a-vs-ZJ22b (93)	All (5841)	Pvalue	Qvalue	Pathway ID	Genes	K_IDs
Metabolism	Global and overview maps	Metabolic pathways	63	2748	3.95001e-05	0.00292301	ko01100	Os02g0627100(OsPAL1);Os02g0323600(OsCYP51H4);Os01g0931400(ROX1);Os09g0469400(OsISA3);Os02g0158300(OsCBSSIS1);Os10g0528900(OsGSTU14);Os10g0109300(PRX125);Os11g0530600(CHS*);Os04g0389800(-);Os05g0211100(CYP51G3);Os06g0699500(-);Os10g0517500(RRJ1);Os08g0543400(-);Os01g0543600(-);Os04g0229100(OsCAD6);Os01g0793300(-);Os11g0484500(Os6PGDH2);Os12g0291400(RbcS5);Os12g0559200(OsLOX11);Os02g0571100(OsCPS2)…	K10775+K05917+K00949+K01214+K06041+K00799+K00430+K00660+K01652+K05917+K07253+K01761+K13065+K00512+K00083+K00422+K00033+K01602+K00454+K04120+K15746+K00430+K08917+K10256+K10775+K01601+K00430+K10251+K01593+K00001+K08695+K00430+K01904+K01082+K00434+K01011+K01115+K01489+K10534+K01904+K02437+K05359+K01602+K01633+K01190+K01662+K01662+K05857+K00927+K08912+K01673+K13222+K00079+K00799+K01904+K13789+K00454+…
Metabolism	Global and overview maps	Biosynthesis of secondary metabolites	41	1549	0.000171549	0.00634732	ko01110	Os02g0627100(OsPAL1);Os02g0323600(OsCYP51H4);Os09g0469400(OsISA3);Os10g0109300(PRX125);Os11g0530600(CHS*);Os05g0102000(OsJMT1);Os04g0389800(-);Os05g0211100(CYP51G3);Os02g0121700(OsTPS3);Os08g0543400(-);Os04g0229100(OsCAD6);Os01g0793300(-);Os11g0484500(Os6PGDH2);Os12g0291400(RbcS5);Os12g0559200(OsLOX11);Os02g0571100(OsCPS2);Os10g0533500(OsBCH3);Os05g0134400(prx65);Os04g0518400(OsPAL07);Os10g035600…	K10775+K05917+K01214+K00430+K00660+K08241+K01652+K05917+K15086+K13065+K00083+K00422+K00033+K01602+K00454+K04120+K15746+K00430+K10775+K01601+K00430+K10251+K01593+K00001+K08695+K00430+K01904+K01115+K01904+K02437+K05359+K01602+K01662+K01662+K00927+K01904+K13789+K00454+K01602+K01177+K01601
Genetic Information Processing	Transcription	RNA polymerase	6	63	0.000453515	0.0111867	ko03020	gene-rpoC1(-);gene-rpoB(-);gene-rpoC2(-);MSTRG.18063(rpoC1);MSTRG.18064(rpoC2);MSTRG.3262(rpoC2)	K03046+K03043+K03046+K03046+K03046+K03046
Metabolism	Biosynthesis of other secondary metabolites	Phenylpropanoid biosynthesis	11	266	0.00312375	0.0428402	ko00940	Os02g0627100(OsPAL1);Os10g0109300(PRX125);Os08g0543400(-);Os04g0229100(OsCAD6);Os05g0134400(prx65);Os04g0518400(OsPAL07);Os01g0294700(OsPOD);Os07g0677400(POX5.1);Os01g0901600(OsACS6);Os07g0280200(OsACS7);Os02g0697400(4CL2)	K10775+K00430+K13065+K00083+K00430+K10775+K00430+K00430+K01904+K01904+K01904
Metabolism	Carbohydrate metabolism	Glyoxylate and dicarboxylate metabolism	6	92	0.00329092	0.0428402	ko00630	Os12g0291400(RbcS5);Os10g0356000(OsrbcL1);Os10g0516100(OsGDCH);Os12g0274700(RBCS);Os12g0291100(RbcS3);MSTRG.24927(rbcL)	K01602+K01601+K02437+K01602+K01602+K01601
Metabolism	Energy metabolism	Carbon fixation in photosynthetic organisms	6	93	0.00347353	0.0428402	ko00710	Os12g0291400(RbcS5);Os10g0356000(OsrbcL1);Os12g0274700(RBCS);Os05g0496200(OsPGK3);Os12g0291100(RbcS3);MSTRG.24927(rbcL)	K01602+K01601+K01602+K00927+K01602+K01601
Metabolism	Metabolism of cofactors and vitamins	Thiamine metabolism	3	23	0.00549433	0.0580829	ko00730	Os01g0931400(ROX1);Os05g0408900(CLA1);Os07g0190000(OsDXS)	K00949+K01662+K01662
Metabolism	Amino acid metabolism	Tyrosine metabolism	4	51	0.00850377	0.0786598	ko00350	Os06g0699500(-);Os01g0793300(-);Os10g0400500(-);Os10g0159800(-)	K07253+K00422+K01593+K00001
Metabolism	Amino acid metabolism	Phenylalanine metabolism	4	55	0.0110606	0.0909429	ko00360	Os02g0627100(OsPAL1);Os06g0699500(-);Os04g0518400(OsPAL07);Os10g0400500(-)	K10775+K07253+K10775+K01593
Metabolism	Lipid metabolism	alpha-Linolenic acid metabolism	4	61	0.0157487	0.110132	ko00592	Os12g0448900(PIOX);Os05g0102000(OsJMT1);Os12g0559200(OsLOX11);Os08g0508800(Lox2:Os:1)	K10529+K08241+K00454+K00454
Metabolism	Metabolism of cofactors and vitamins	Folate biosynthesis	3	34	0.0163709	0.110132	ko00790	Os01g0238500(-);Os08g0556200(-);Os02g0607700(-)	K18482+K01633+K00079
Metabolism	Energy metabolism	Nitrogen metabolism	3	39	0.0236211	0.145663	ko00910	Os01g0547600(NRT2.4);Os02g0770800(OsNIA1);Os01g0639900(BETACA1)	K02575+K10534+K01673
Metabolism	Energy metabolism	Photosynthesis - antenna proteins	2	17	0.0292042	0.166239	ko00196	Os04g0457000(CP24);Os01g0720500(Lhcb1.1)	K08917+K08912
Metabolism	Lipid metabolism	Linoleic acid metabolism	2	20	0.0395656	0.209132	ko00591	Os12g0559200(OsLOX11);Os08g0508800(Lox2:Os:1)	K00454+K00454
Metabolism	Biosynthesis of other secondary metabolites	Benzoxazinoid biosynthesis	1	3	0.0470172	0.217982	ko00402	Os03g0797500(-)	K13222
Metabolism	Metabolism of other amino acids	Selenocompound metabolism	2	22	0.0471313	0.217982	ko00450	Os07g0657900(NTRC);Os10g0517500(RRJ1)	K00384+K01761
Metabolism	Metabolism of other amino acids	Glutathione metabolism	5	132	0.0586317	0.250782	ko00480	Os10g0528900(OsGSTU14);Os11g0484500(Os6PGDH2);Os04g0602100(-);Os10g0531400(OsGSTU10);Os09g0467200(OsGSTU17)	K00799+K00033+K00434+K00799+K00799
Metabolism	Biosynthesis of other secondary metabolites	Indole alkaloid biosynthesis	1	4	0.0621983	0.250782	ko00901	Os10g0400500(-)	K01593
Metabolism	Metabolism of cofactors and vitamins	Ubiquinone and other terpenoid-quinone biosynthesis	3	58	0.0643901	0.250782	ko00130	Os01g0901600(OsACS6);Os07g0280200(OsACS7);Os02g0697400(4CL2)	K01904+K01904+K01904
Metabolism	Metabolism of terpenoids and polyketides	Terpenoid backbone biosynthesis	3	60	0.0698329	0.258382	ko00900	Os05g0408900(CLA1);Os07g0190000(OsDXS);Os01g0248701(-)	K01662+K01662+K13789
Metabolism	Biosynthesis of other secondary metabolites	Flavonoid biosynthesis	3	62	0.0754776	0.259525	ko00941	Os11g0530600(CHS*);Os08g0543400(-);Os04g0630400(-)	K00660+K13065+K08695
Metabolism	Biosynthesis of other secondary metabolites	Isoquinoline alkaloid biosynthesis	2	29	0.0771559	0.259525	ko00950	Os01g0793300(-);Os10g0400500(-)	K00422+K01593
Metabolism	Biosynthesis of other secondary metabolites	Betalain biosynthesis	1	6	0.0918465	0.295506	ko00965	Os10g0400500(-)	K01593
Metabolism	Global and overview maps	Carbon metabolism	8	307	0.114491	0.353013	ko01200	Os11g0484500(Os6PGDH2);Os12g0291400(RbcS5);Os10g0356000(OsrbcL1);Os10g0516100(OsGDCH);Os12g0274700(RBCS);Os05g0496200(OsPGK3);Os12g0291100(RbcS3);MSTRG.24927(rbcL)	K00033+K01602+K01601+K02437+K01602+K00927+K01602+K01601
Metabolism	Energy metabolism	Sulfur metabolism	2	40	0.132748	0.392171	ko00920	Os07g0558300(-);Os02g0167100(OsStr23)	K01082+K01011
Metabolism	Lipid metabolism	Biosynthesis of unsaturated fatty acids	2	41	0.138175	0.392171	ko01040	Os02g0716500(OsFAD2);Os04g0116600(-)	K10256+K10251
Metabolism	Carbohydrate metabolism	C5-Branched dibasic acid metabolism	1	10	0.148389	0.392171	ko00660	Os04g0389800(-)	K01652
Metabolism	Metabolism of terpenoids and polyketides	Monoterpenoid biosynthesis	1	10	0.148389	0.392171	ko00902	Os02g0121700(OsTPS3)	K15086
Metabolism	Lipid metabolism	Steroid biosynthesis	2	45	0.160336	0.409133	ko00100	Os02g0323600(OsCYP51H4);Os05g0211100(CYP51G3)	K05917+K05917
Metabolism	Lipid metabolism	Fatty acid elongation	2	46	0.165976	0.409408	ko00062	Os04g0116600(-);Os03g0101100(-)	K10251+K01074
Metabolism	Global and overview maps	Fatty acid metabolism	3	91	0.176226	0.420668	ko01212	Os02g0716500(OsFAD2);Os04g0116600(-);Os03g0101100(-)	K10256+K10251+K01074
Genetic Information Processing	Folding, sorting and degradation	Sulfur relay system	1	16	0.226735	0.524325	ko04122	Os02g0167100(OsStr23)	K01011
Metabolism	Glycan biosynthesis and metabolism	Other glycan degradation	1	18	0.251232	0.563368	ko00511	Os01g0952600(-)	K01190
Metabolism	Lipid metabolism	Arachidonic acid metabolism	1	19	0.26319	0.572826	ko00590	Os02g0607700(-)	K00079
Metabolism	Metabolism of terpenoids and polyketides	Sesquiterpenoid and triterpenoid biosynthesis	1	20	0.27496	0.581344	ko00909	Os06g0483200(OsOSC6)	K19011
Metabolism	Amino acid metabolism	Valine, leucine and isoleucine biosynthesis	1	24	0.320207	0.658204	ko00290	Os04g0389800(-)	K01652
Metabolism	Biosynthesis of other secondary metabolites	Stilbenoid, diarylheptanoid and gingerol biosynthesis	1	28	0.36266	0.72532	ko00945	Os08g0543400(-)	K13065
Metabolism	Lipid metabolism	Ether lipid metabolism	1	33	0.412054	0.756954	ko00565	Os06g0604200(OsPLDalpha4)	K01115
Metabolism	Lipid metabolism	Cutin, suberine and wax biosynthesis	1	35	0.430733	0.756954	ko00073	Os06g0254700(-)	K17991
Metabolism	Lipid metabolism	Sphingolipid metabolism	1	35	0.430733	0.756954	ko00600	Os01g0952600(-)	K01190
Metabolism	Metabolism of cofactors and vitamins	Pantothenate and CoA biosynthesis	1	35	0.430733	0.756954	ko00770	Os04g0389800(-)	K01652
Metabolism	Energy metabolism	Photosynthesis	2	92	0.432809	0.756954	ko00195	Os07g0147500(PsbR);Os01g0869800(PSBS1)	K03541+K03542
Metabolism	Carbohydrate metabolism	Butanoate metabolism	1	36	0.439852	0.756954	ko00650	Os04g0389800(-)	K01652
Metabolism	Metabolism of terpenoids and polyketides	Carotenoid biosynthesis	1	38	0.457657	0.769697	ko00906	Os10g0533500(OsBCH3)	K15746
Cellular Processes	Transport and catabolism	Endocytosis	3	172	0.519857	0.854875	ko04144	Os11g0703900(HSP70);Os06g0604200(OsPLDalpha4);Os12g0569700(OsHsp23.7)	K03283+K01115+K03283
Environmental Information Processing	Membrane transport	ABC transporters	1	51	0.560494	0.86038	ko02010	Os04g0209300(OsABCC10)	K05665
Organismal Systems	Environmental adaptation	Circadian rhythm - plant	1	51	0.560494	0.86038	ko04712	Os11g0530600(CHS*)	K00660
Metabolism	Metabolism of terpenoids and polyketides	Diterpenoid biosynthesis	1	53	0.574501	0.86038	ko00904	Os02g0571100(OsCPS2)	K04120
Metabolism	Lipid metabolism	Fatty acid degradation	1	54	0.581338	0.86038	ko00071	Os10g0159800(-)	K00001
Metabolism	Amino acid metabolism	Phenylalanine, tyrosine and tryptophan biosynthesis	1	54	0.581338	0.86038	ko00400	Os04g0406600(-)	K05359
Metabolism	Amino acid metabolism	Cysteine and methionine metabolism	2	129	0.613698	0.863682	ko00270	Os10g0517500(RRJ1);Os02g0167100(OsStr23)	K01761+K01011
Metabolism	Carbohydrate metabolism	Pentose phosphate pathway	1	62	0.63226	0.863682	ko00030	Os11g0484500(Os6PGDH2)	K00033
Metabolism	Carbohydrate metabolism	Ascorbate and aldarate metabolism	1	63	0.638178	0.863682	ko00053	Os04g0602100(-)	K00434
Metabolism	Carbohydrate metabolism	Galactose metabolism	1	67	0.660922	0.863682	ko00052	Os01g0952600(-)	K01190
Metabolism	Nucleotide metabolism	Pyrimidine metabolism	1	67	0.660922	0.863682	ko00240	Os01g0712700(-)	K01489
Metabolism	Global and overview maps	2-Oxocarboxylic acid metabolism	1	67	0.660922	0.863682	ko01210	Os04g0389800(-)	K01652
Genetic Information Processing	Transcription	Spliceosome	3	216	0.675063	0.863682	ko03040	Os11g0703900(HSP70);Os12g0569700(OsHsp23.7);Os04g0118900(-)	K03283+K03283+K12893
Metabolism	Carbohydrate metabolism	Fructose and mannose metabolism	1	73	0.692412	0.863682	ko00051	Os06g0652300(-)	K02377
Metabolism	Carbohydrate metabolism	Inositol phosphate metabolism	1	77	0.71178	0.863682	ko00562	Os05g0127200(OsPLC4)	K05857
Metabolism	Amino acid metabolism	Tryptophan metabolism	1	81	0.72994	0.863682	ko00380	Os10g0400500(-)	K01593
Metabolism	Carbohydrate metabolism	Glycolysis / Gluconeogenesis	2	161	0.732232	0.863682	ko00010	Os10g0159800(-);Os05g0496200(OsPGK3)	K00001+K00927
Genetic Information Processing	Folding, sorting and degradation	Protein processing in endoplasmic reticulum	3	236	0.732442	0.863682	ko04141	Os11g0703900(HSP70);Os09g0482100(OsHSP82);Os12g0569700(OsHsp23.7)	K03283+K04079+K03283
Metabolism	Amino acid metabolism	Glycine, serine and threonine metabolism	1	84	0.742814	0.863682	ko00260	Os10g0516100(OsGDCH)	K02437
Environmental Information Processing	Signal transduction	Phosphatidylinositol signaling system	1	85	0.746968	0.863682	ko04070	Os05g0127200(OsPLC4)	K05857
Cellular Processes	Transport and catabolism	Phagosome	1	93	0.777901	0.88561	ko04145	Os03g0661300(TUB8)	K07375
Metabolism	Global and overview maps	Biosynthesis of amino acids	3	269	0.809556	0.904086	ko01230	Os04g0389800(-);Os04g0406600(-);Os05g0496200(OsPGK3)	K01652+K05359+K00927
Metabolism	Carbohydrate metabolism	Starch and sucrose metabolism	2	197	0.827609	0.904086	ko00500	Os09g0469400(OsISA3);Os07g0543100(-)	K01214+K01177
Environmental Information Processing	Signal transduction	Plant hormone signal transduction	3	280	0.830782	0.904086	ko04075	Os03g0667100(OsNPR3);Os01g0382000(OsPR1b);Os02g0643800(OsSAUR11)	K14508+K13449+K14488
Organismal Systems	Environmental adaptation	Plant-pathogen interaction	3	292	0.851626	0.911687	ko04626	Os01g0382000(OsPR1b);Os06g0188000(OsCNGC10);Os09g0482100(OsHSP82)	K13449+K05391+K04079
Genetic Information Processing	Translation	mRNA surveillance pathway	1	124	0.86623	0.911687	ko03015	Os02g0217500(-)	K14399
Metabolism	Lipid metabolism	Glycerophospholipid metabolism	1	128	0.874727	0.911687	ko00564	Os06g0604200(OsPLDalpha4)	K01115
Genetic Information Processing	Translation	Ribosome	3	359	0.931787	0.956128	ko03010	Os05g0388500(-);gene-rps4(-);gene-rps2-2(-)	K02863+K02986+K02967
Metabolism	Carbohydrate metabolism	Amino sugar and nucleotide sugar metabolism	1	176	0.943207	0.956128	ko00520	Os06g0652300(-)	K02377
Environmental Information Processing	Signal transduction	MAPK signaling pathway - plant	1	212	0.968762	0.968762	ko04016	Os01g0382000(OsPR1b)	K13449

## Sheet:  ZJ22a-vs-ZJ22c
All enrichment pathways of mRNAs of the comparison between ZJ22a and ZJ22c.
KEGG_A_class	KEGG_B_class	Pathway	ZJ22a-vs-ZJ22c (220)	All (5841)	Pvalue	Qvalue	Pathway ID	Genes	K_IDs
Metabolism	Energy metabolism	Photosynthesis - antenna proteins	9	17	2.42631e-09	2.25647e-07	ko00196	Os08g0435900(cab);Os04g0457000(CP24);Os11g0242800(ASCAB9-A);Os07g0558400(CP29);Os07g0577600(-);Os01g0600900(CAB2R);Os03g0592500(LHCB);Os01g0720500(Lhcb1.1);Os06g0320500(-)	K08910+K08917+K08916+K08915+K08908+K08912+K08913+K08912+K08907
Metabolism	Energy metabolism	Photosynthesis	12	92	0.000152379	0.0070856	ko00195	Os05g0560000(PSAH);Os07g0147500(PsbR);Os08g0104600(Fd1);Os01g0938100(PSB28);Os03g0333400(-);Os08g0560900(PsaD);Os01g0869800(PSBS1);Os02g0750100(-);Os03g0778100(OsPS1-F);gene-psaB(-);MSTRG.20157(atpH);MSTRG.3260(atpB)	K02695+K03541+K02639+K08903+K08902+K02692+K03542+K02113+K02694+K02690+K02110+K02112
Metabolism	Biosynthesis of other secondary metabolites	Phenylpropanoid biosynthesis	20	266	0.0022847	0.0537538	ko00940	Os02g0627100(OsPAL1);Os07g0676900(prx109);Os04g0500700(OsHCT1);Os10g0109300(PRX125);Os08g0277200(OsCCR);Os02g0240300(prx29);Os08g0509200(Os8bglu27);Os08g0543400(-);Os04g0229100(OsCAD6);Os04g0688500(prx62);Os12g0199500(OsCOMTL1);Os04g0518400(OsPAL07);Os01g0294700(OsPOD);Os04g0513400(Os4bglu16);Os06g0165800(ROMT-16);Os07g0280200(OsACS7);Os01g0172600(-);Os08g0113000(prx117);Os02g0697400(4CL2);Os01g0…	K10775+K00430+K13065+K00430+K09753+K00430+K01188+K13065+K00083+K00430+K13066+K10775+K00430+K05350+K00588+K01904+K00430+K00430+K01904+K12355
Genetic Information Processing	Transcription	RNA polymerase	8	63	0.00231199	0.0537538	ko03020	gene-rpoC1(-);gene-rpoB(-);gene-rpoC2(-);MSTRG.18061(rpoB);MSTRG.18063(rpoC1);MSTRG.18064(rpoC2);MSTRG.21455(rpoA);MSTRG.3262(rpoC2)	K03046+K03043+K03046+K03043+K03046+K03046+K03040+K03046
Metabolism	Energy metabolism	Carbon fixation in photosynthetic organisms	9	93	0.00798082	0.148443	ko00710	Os12g0207600(-);Os12g0291400(RbcS5);Os10g0356000(OsrbcL1);Os04g0459500(-);Os12g0292400(RBCS);Os12g0274700(RBCS);Os05g0496200(OsPGK3);Os12g0291100(RbcS3);MSTRG.24927(rbcL)	K01601+K01602+K01601+K05298+K01602+K01602+K00927+K01602+K01601
Metabolism	Metabolism of other amino acids	Glutathione metabolism	11	132	0.0106447	0.164994	ko00480	Os12g0178100(OsAPx6);Os10g0528900(OsGSTU14);Os10g0528100(OsGSTU24);Os11g0484500(Os6PGDH2);Os02g0553200(APX8);Os10g0529700(OsGSTU8);Os04g0602100(-);Os10g0368100(-);Os03g0283200(OsGSTL1);Os10g0531400(OsGSTU10);Os09g0467200(OsGSTU17)	K00434+K00799+K00799+K00033+K00434+K00799+K00434+K00799+K00799+K00799+K00799
Metabolism	Global and overview maps	Biosynthesis of secondary metabolites	72	1549	0.0218588	0.255377	ko01110	Os02g0627100(OsPAL1);Os07g0676900(prx109);Os02g0323600(OsCYP51H4);Os06g0569500(KO4);Os04g0500700(OsHCT1);Os03g0189400(-);Os02g0571300(OsKS5);Os10g0109300(PRX125);Os03g0826600(NPC1);Os05g0102000(OsJMT1);Os08g0277200(OsCCR);Os10g0178500(OsUGT98B3);Os05g0524400(OsPFK05);Os12g0207600(-);Os05g0555600(OsGLT2);Os01g0715400(OsSTA30);Os02g0571800(OsKS6);Os02g0541325(-);Os02g0240300(prx29);Os10g0502400(HEM…	K10775+K00430+K05917+K21719+K13065+K00121+K14038+K00430+K01114+K08241+K09753+K13496+K00850+K01601+K00264+K01176+K16082+K01590+K00430+K02492+K13545+K01188+K16083+K13065+K00083+K00422+K00430+K00033+K01602+K00454+K04120+K08081+K13066+K16055+K10775+K18693+K00454+K22845+K01087+K01601+K00430+K10251+K01593+K00001+K08695+K05350+K01115+K22389+K13545+K00588+K01114+K00549+K01602+K01904+K00793+K02437+K05359+…
Metabolism	Carbohydrate metabolism	Glyoxylate and dicarboxylate metabolism	8	92	0.0219679	0.255377	ko00630	Os12g0207600(-);Os12g0291400(RbcS5);Os10g0356000(OsrbcL1);Os12g0292400(RBCS);Os10g0516100(OsGDCH);Os12g0274700(RBCS);Os12g0291100(RbcS3);MSTRG.24927(rbcL)	K01601+K01602+K01601+K01602+K02437+K01602+K01602+K01601
Metabolism	Lipid metabolism	alpha-Linolenic acid metabolism	6	61	0.0263796	0.26412	ko00592	Os12g0448900(PIOX);Os05g0102000(OsJMT1);Os12g0559200(OsLOX11);Os02g0194700(OsLOX1);Os04g0615100(-);Os08g0508800(Lox2:Os:1)	K10529+K08241+K00454+K00454+K22389+K00454
Genetic Information Processing	Translation	Ribosome	21	359	0.0284	0.26412	ko03010	Os07g0180900(-);Os12g0567700(rpl2);Os03g0219900(-);Os09g0485900(-);Os03g0452300(-);Os05g0388500(-);Os12g0124200(-);Os02g0785800(-);Os08g0117300(-);Os11g0220800(-);Os02g0105900(-);Os03g0796501(OsRPL4);Os02g0162500(-);Os08g0326400(OsRPL7A);Os04g0349500(-);Os09g0258600(rpl22);Os03g0756000(-);gene-rps18(-);gene-rps4(-);gene-rps2-2(-);MSTRG.27933(rpl22)	K02930+K02938+K02876+K02940+K02988+K02863+K02960+K02917+K02953+K02866+K02987+K02930+K02955+K02936+K02995+K02880+K02872+K02963+K02986+K02967+K02890
Metabolism	Lipid metabolism	Linoleic acid metabolism	3	20	0.0374425	0.316559	ko00591	Os12g0559200(OsLOX11);Os02g0194700(OsLOX1);Os08g0508800(Lox2:Os:1)	K00454+K00454+K00454
Metabolism	Amino acid metabolism	Tyrosine metabolism	5	51	0.041756	0.323609	ko00350	Os03g0189400(-);Os06g0699500(-);Os01g0793300(-);Os10g0400500(-);Os10g0159800(-)	K00121+K07253+K00422+K01593+K00001
Metabolism	Metabolism of terpenoids and polyketides	Diterpenoid biosynthesis	5	53	0.0480558	0.343784	ko00904	Os06g0569500(KO4);Os02g0571300(OsKS5);Os02g0571800(OsKS6);Os02g0570500(Oscyp71Z6);Os02g0571100(OsCPS2)	K21719+K14038+K16082+K16083+K04120
Metabolism	Amino acid metabolism	Phenylalanine metabolism	5	55	0.0548888	0.35706	ko00360	Os02g0627100(OsPAL1);Os06g0699500(-);Os04g0518400(OsPAL07);Os10g0400500(-);Os01g0796400(-)	K10775+K07253+K10775+K01593+K00074
Metabolism	Energy metabolism	Nitrogen metabolism	4	39	0.0575903	0.35706	ko00910	Os01g0547600(NRT2.4);Os05g0555600(OsGLT2);Os04g0412500(OsalphaCA2);Os01g0639900(BETACA1)	K02575+K00264+K01674+K01673
Metabolism	Global and overview maps	Metabolic pathways	115	2748	0.0651003	0.378395	ko01100	Os12g0178100(OsAPx6);Os02g0627100(OsPAL1);Os07g0676900(prx109);Os02g0323600(OsCYP51H4);Os04g0500700(OsHCT1);Os03g0189400(-);Os02g0158300(OsCBSSIS1);Os10g0528900(OsGSTU14);Os10g0109300(PRX125);Os03g0826600(NPC1);Os03g0797400(OsIGL);Os03g0757900(-);Os08g0277200(OsCCR);Os03g0599800(OsUAM1);Os05g0247100(DIP3);Os05g0524400(OsPFK05);Os08g0435900(cab);Os12g0207600(-);Os05g0555600(OsGLT2);Os01g0715400(Os…	K00434+K10775+K00430+K05917+K13065+K00121+K06041+K00799+K00430+K01114+K13222+K00012+K09753+K13379+K01183+K00850+K08910+K01601+K00264+K01176+K00951+K01590+K00430+K02492+K01188+K07253+K13065+K00512+K00799+K00083+K00422+K00430+K01886+K00033+K01602+K00454+K04120+K07964+K02692+K08917+K10256+K08081+K13066+K16055+K14641+K00770+K10775+K00454+K01087+K01601+K08916+K00434+K08915+K00430+K10251+K01593+K00001+…
Metabolism	Biosynthesis of other secondary metabolites	Flavonoid biosynthesis	5	62	0.082991	0.42843	ko00941	Os04g0500700(OsHCT1);Os08g0543400(-);Os10g0116400(-);Os04g0630400(-);Os06g0165800(ROMT-16)	K13065+K13065+K22845+K08695+K00588
Metabolism	Biosynthesis of other secondary metabolites	Stilbenoid, diarylheptanoid and gingerol biosynthesis	3	28	0.0865895	0.42843	ko00945	Os04g0500700(OsHCT1);Os08g0543400(-);Os06g0165800(ROMT-16)	K13065+K13065+K00588
Metabolism	Carbohydrate metabolism	Ascorbate and aldarate metabolism	5	63	0.0875286	0.42843	ko00053	Os12g0178100(OsAPx6);Os03g0757900(-);Os02g0553200(APX8);Os04g0602100(-);Os02g0646500(OS-ALDH)	K00434+K00012+K00434+K00434+K00128
Metabolism	Biosynthesis of other secondary metabolites	Benzoxazinoid biosynthesis	1	3	0.10881	0.505966	ko00402	Os03g0797400(OsIGL)	K13222
Environmental Information Processing	Membrane transport	ABC transporters	4	51	0.12441	0.533256	ko02010	Os04g0209300(OsABCC10);Os01g0695700(OsABCB4);Os05g0137200(OsABCB17);Os04g0693300(-)	K05665+K05658+K05658+K05681
Metabolism	Lipid metabolism	Ether lipid metabolism	3	33	0.126147	0.533256	ko00565	Os03g0826600(NPC1);Os06g0604300(OsPLDalpha5);Os03g0852800(OsNPC3)	K01114+K01115+K01114
Metabolism	Biosynthesis of other secondary metabolites	Indole alkaloid biosynthesis	1	4	0.142394	0.575765	ko00901	Os10g0400500(-)	K01593
Metabolism	Metabolism of terpenoids and polyketides	Sesquiterpenoid and triterpenoid biosynthesis	2	20	0.172597	0.663016	ko00909	Os08g0139700(OsTPS29);Os06g0483200(OsOSC6)	K15803+K19011
Genetic Information Processing	Folding, sorting and degradation	Protein processing in endoplasmic reticulum	12	236	0.17823	0.663016	ko04141	Os09g0482400(OsHsp80.2);Os03g0733800(ERO1);Os09g0482600(OsHsp90);Os11g0703900(HSP70);Os06g0634600(-);Os12g0514500(-);Os01g0819500(OsUBC22);Os03g0648400(OsDjA4);Os07g0209000(OsDGL1);Os04g0693000(-);Os09g0482100(OsHSP82);Os12g0569700(OsHsp23.7)	K04079+K10950+K04079+K03283+K14012+K09487+K06689+K09503+K12670+K12666+K04079+K03283
Metabolism	Lipid metabolism	Biosynthesis of unsaturated fatty acids	3	41	0.199604	0.663669	ko01040	Os02g0716500(OsFAD2);Os04g0116600(-);Os03g0423300(-)	K10256+K10251+K03921
Metabolism	Biosynthesis of other secondary metabolites	Betalain biosynthesis	1	6	0.205828	0.663669	ko00965	Os10g0400500(-)	K01593
Metabolism	Metabolism of terpenoids and polyketides	Zeatin biosynthesis	3	42	0.209426	0.663669	ko00908	Os10g0178500(OsUGT98B3);Os05g0374200(OsCKX9);Os04g0556600(CZOGT2)	K13496+K00279+K13495
Metabolism	Amino acid metabolism	Histidine metabolism	2	23	0.214087	0.663669	ko00340	Os02g0541325(-);Os02g0646500(OS-ALDH)	K01590+K00128
Metabolism	Metabolism of cofactors and vitamins	Thiamine metabolism	2	23	0.214087	0.663669	ko00730	Os05g0408900(CLA1);Os07g0190000(OsDXS)	K01662+K01662
Environmental Information Processing	Signal transduction	Plant hormone signal transduction	13	280	0.255961	0.767883	ko04075	Os07g0592600(GH3-8);Os03g0667100(OsNPR3);Os03g0297600(OsPYL/RCAR4);Os11g0143300(OSRR9);Os01g0382000(OsPR1b);Os03g0268600(OsPP2C30);Os04g0442300(OSRR1);Os12g0139400(RR10);Os04g0637000(OsTGAP1);Os01g0583100(OsPP2C06/OsABI2);Os01g0286100(PIL15);Os05g0473000(OsPYL/RCAR6);Os01g0952500(RR4)	K14487+K14508+K14496+K14492+K13449+K14497+K14492+K14492+K14431+K14497+K12126+K14496+K14492
Metabolism	Global and overview maps	Carbon metabolism	14	307	0.266338	0.774043	ko01200	Os03g0189400(-);Os05g0524400(OsPFK05);Os12g0207600(-);Os11g0484500(Os6PGDH2);Os12g0291400(RbcS5);Os10g0356000(OsrbcL1);Os04g0459500(-);Os12g0292400(RBCS);Os10g0516100(OsGDCH);Os12g0274700(RBCS);Os01g0796400(-);Os05g0496200(OsPGK3);Os12g0291100(RbcS3);MSTRG.24927(rbcL)	K00121+K00850+K01601+K00033+K01602+K01601+K05298+K01602+K02437+K01602+K00074+K00927+K01602+K01601
Metabolism	Metabolism of other amino acids	Taurine and hypotaurine metabolism	1	9	0.292327	0.778447	ko00430	Os03g0236200(OsGAD3)	K01580
Metabolism	Metabolism of terpenoids and polyketides	Limonene and pinene degradation	1	9	0.292327	0.778447	ko00903	Os02g0646500(OS-ALDH)	K00128
Metabolism	Biosynthesis of other secondary metabolites	Isoquinoline alkaloid biosynthesis	2	29	0.298807	0.778447	ko00950	Os01g0793300(-);Os10g0400500(-)	K00422+K01593
Organismal Systems	Environmental adaptation	Circadian rhythm - plant	3	51	0.301334	0.778447	ko04712	Os06g0552900(OsFTL12);Os01g0182600(GI);Os01g0286100(PIL15)	K16223+K12124+K12126
Metabolism	Metabolism of cofactors and vitamins	Porphyrin and chlorophyll metabolism	3	52	0.31176	0.783614	ko00860	Os10g0502400(HEMA1);Os10g0389200(OsRCCR1);Os10g0389300(OsRCCR2)	K02492+K13545+K13545
Metabolism	Lipid metabolism	Fatty acid degradation	3	54	0.332636	0.814084	ko00071	Os03g0189400(-);Os10g0159800(-);Os02g0646500(OS-ALDH)	K00121+K00001+K00128
Metabolism	Glycan biosynthesis and metabolism	Various types of N-glycan biosynthesis	2	34	0.368446	0.856636	ko00513	Os07g0209000(OsDGL1);Os04g0693000(-)	K12670+K12666
Metabolism	Metabolism of cofactors and vitamins	Folate biosynthesis	2	34	0.368446	0.856636	ko00790	Os01g0238500(-);Os08g0556200(-)	K18482+K01633
Metabolism	Carbohydrate metabolism	Butanoate metabolism	2	36	0.395586	0.897305	ko00650	Os01g0796400(-);Os03g0236200(OsGAD3)	K00074+K01580
Metabolism	Glycan biosynthesis and metabolism	Glycosaminoglycan degradation	1	17	0.479822	0.993321	ko00531	Os06g0179000(-)	K07964
Metabolism	Glycan biosynthesis and metabolism	N-Glycan biosynthesis	2	43	0.48589	0.993321	ko00510	Os07g0209000(OsDGL1);Os04g0693000(-)	K12670+K12666
Metabolism	Energy metabolism	Oxidative phosphorylation	7	180	0.521084	0.993321	ko00190	Os02g0750100(-);gene-ndhA(-);gene-cob(-);MSTRG.20157(atpH);MSTRG.30597(COX1);MSTRG.3260(atpB);MSTRG.9475(atpH)	K02113+K05572+K00412+K02110+K02256+K02112+K02128
Metabolism	Lipid metabolism	Glycerophospholipid metabolism	5	128	0.532044	0.993321	ko00564	Os03g0826600(NPC1);Os08g0359200(-);Os06g0604300(OsPLDalpha5);Os04g0615100(-);Os03g0852800(OsNPC3)	K01114+K18693+K01115+K22389+K01114
Metabolism	Metabolism of cofactors and vitamins	Riboflavin metabolism	1	20	0.536582	0.993321	ko00740	Os12g0541000(-)	K00793
Metabolism	Metabolism of other amino acids	beta-Alanine metabolism	2	49	0.556331	0.993321	ko00410	Os03g0236200(OsGAD3);Os02g0646500(OS-ALDH)	K01580+K00128
Metabolism	Metabolism of other amino acids	Selenocompound metabolism	1	22	0.570951	0.993321	ko00450	Os12g0623900(-)	K00549
Metabolism	Metabolism of cofactors and vitamins	Nicotinate and nicotinamide metabolism	1	23	0.587173	0.993321	ko00760	Os07g0634400(-)	K18551
Metabolism	Metabolism of terpenoids and polyketides	Brassinosteroid biosynthesis	1	26	0.632263	0.993321	ko00905	Os03g0227700(OsDWF4)	K09587
Metabolism	Metabolism of cofactors and vitamins	Ubiquinone and other terpenoid-quinone biosynthesis	2	58	0.648666	0.993321	ko00130	Os07g0280200(OsACS7);Os02g0697400(4CL2)	K01904+K01904
Metabolism	Amino acid metabolism	Alanine, aspartate and glutamate metabolism	2	59	0.657931	0.993321	ko00250	Os05g0555600(OsGLT2);Os03g0236200(OsGAD3)	K00264+K01580
Metabolism	Metabolism of terpenoids and polyketides	Terpenoid backbone biosynthesis	2	60	0.667	0.993321	ko00900	Os05g0408900(CLA1);Os07g0190000(OsDXS)	K01662+K01662
Metabolism	Global and overview maps	Fatty acid metabolism	3	91	0.672873	0.993321	ko01212	Os02g0716500(OsFAD2);Os04g0116600(-);Os03g0423300(-)	K10256+K10251+K03921
Metabolism	Carbohydrate metabolism	Pentose phosphate pathway	2	62	0.684558	0.993321	ko00030	Os05g0524400(OsPFK05);Os11g0484500(Os6PGDH2)	K00850+K00033
Genetic Information Processing	Transcription	Spliceosome	7	216	0.712477	0.993321	ko03040	Os11g0703900(HSP70);Os03g0708600(OsRH21);Os01g0956600(-);Os02g0122800(-);Os08g0416400(-);Os11g0704700(-);Os12g0569700(OsHsp23.7)	K03283+K12858+K12837+K12893+K12822+K12900+K03283
Metabolism	Metabolism of other amino acids	Cyanoamino acid metabolism	2	67	0.725155	0.993321	ko00460	Os08g0509200(Os8bglu27);Os04g0513400(Os4bglu16)	K01188+K05350
Metabolism	Carbohydrate metabolism	Glycolysis / Gluconeogenesis	5	161	0.732366	0.993321	ko00010	Os03g0189400(-);Os05g0524400(OsPFK05);Os10g0159800(-);Os05g0496200(OsPGK3);Os02g0646500(OS-ALDH)	K00121+K00850+K00001+K00927+K00128
Metabolism	Lipid metabolism	Cutin, suberine and wax biosynthesis	1	35	0.740173	0.993321	ko00073	Os06g0254700(-)	K17991
Metabolism	Biosynthesis of other secondary metabolites	Tropane, piperidine and pyridine alkaloid biosynthesis	1	35	0.740173	0.993321	ko00960	Os03g0269100(OsSAG13)	K08081
Metabolism	Carbohydrate metabolism	Starch and sucrose metabolism	6	197	0.759537	0.993321	ko00500	Os01g0715400(OsSTA30);Os08g0509200(Os8bglu27);Os09g0397300(-);Os10g0553300(OsTPP2);Os04g0513400(Os4bglu16);Os07g0543100(-)	K01176+K01188+K16055+K01087+K05350+K01177
Genetic Information Processing	Translation	RNA transport	6	197	0.759537	0.993321	ko03013	Os03g0177900(rfa3*);Os02g0812400(-);Os01g0746200(NUP85);Os01g0120800(eIF-3a);Os09g0453500(-);Os11g0518900(-)	K03231+K03240+K14304+K03254+K14307+K14289
Metabolism	Carbohydrate metabolism	Fructose and mannose metabolism	2	73	0.767976	0.993321	ko00051	Os05g0524400(OsPFK05);Os06g0652300(-)	K00850+K02377
Metabolism	Metabolism of terpenoids and polyketides	Carotenoid biosynthesis	1	38	0.768608	0.993321	ko00906	Os03g0645900(OsNCED1)	K09840
Metabolism	Nucleotide metabolism	Purine metabolism	3	107	0.774562	0.993321	ko00230	Os05g0161500(-);Os12g0123500(-);Os08g0326600(-)	K00951+K14641+K01951
Cellular Processes	Transport and catabolism	Endocytosis	5	172	0.783387	0.993321	ko04144	Os11g0703900(HSP70);Os01g0661500(-);Os06g0604300(OsPLDalpha5);Os03g0811900(OsARFA1f);Os12g0569700(OsHsp23.7)	K03283+K11866+K01115+K07937+K03283
Metabolism	Energy metabolism	Sulfur metabolism	1	40	0.785822	0.993321	ko00920	Os07g0558300(-)	K01082
Metabolism	Carbohydrate metabolism	Inositol phosphate metabolism	2	77	0.793209	0.993321	ko00562	Os03g0826600(NPC1);Os03g0852800(OsNPC3)	K01114+K01114
Metabolism	Carbohydrate metabolism	Amino sugar and nucleotide sugar metabolism	5	176	0.799978	0.993321	ko00520	Os03g0757900(-);Os03g0599800(OsUAM1);Os05g0247100(DIP3);Os12g0555600(ND1);Os06g0652300(-)	K00012+K13379+K01183+K00770+K02377
Metabolism	Amino acid metabolism	Tryptophan metabolism	2	81	0.815998	0.993321	ko00380	Os10g0400500(-);Os02g0646500(OS-ALDH)	K01593+K00128
Genetic Information Processing	Folding, sorting and degradation	SNARE interactions in vesicular transport	1	44	0.816518	0.993321	ko04130	Os03g0787000(-)	K08486
Environmental Information Processing	Signal transduction	MAPK signaling pathway - plant	6	212	0.817663	0.993321	ko04016	Os03g0297600(OsPYL/RCAR4);Os02g0322400(-);Os01g0382000(OsPR1b);Os03g0268600(OsPP2C30);Os01g0583100(OsPP2C06/OsABI2);Os05g0473000(OsPYL/RCAR6)	K14496+K20716+K13449+K14497+K14497+K14496
Metabolism	Lipid metabolism	Steroid biosynthesis	1	45	0.823481	0.993321	ko00100	Os02g0323600(OsCYP51H4)	K05917
Metabolism	Lipid metabolism	Fatty acid elongation	1	46	0.830181	0.993321	ko00062	Os04g0116600(-)	K10251
Metabolism	Amino acid metabolism	Lysine degradation	1	50	0.854543	0.993321	ko00310	Os02g0646500(OS-ALDH)	K00128
Metabolism	Lipid metabolism	Fatty acid biosynthesis	1	52	0.865386	0.993321	ko00061	Os03g0423300(-)	K03921
Metabolism	Amino acid metabolism	Valine, leucine and isoleucine degradation	1	52	0.865386	0.993321	ko00280	Os02g0646500(OS-ALDH)	K00128
Organismal Systems	Environmental adaptation	Plant-pathogen interaction	8	292	0.868102	0.993321	ko04626	Os09g0482400(OsHsp80.2);Os09g0482600(OsHsp90);Os12g0514500(-);Os01g0382000(OsPR1b);Os11g0224900(Os11gRGA3);Os09g0482100(OsHSP82);Os03g0128700(OSCDPK7);Os01g0949300(-)	K04079+K04079+K09487+K13449+K13457+K04079+K13412+K13448
Metabolism	Amino acid metabolism	Phenylalanine, tyrosine and tryptophan biosynthesis	1	54	0.875424	0.993321	ko00400	Os04g0406600(-)	K05359
Metabolism	Lipid metabolism	Glycerolipid metabolism	2	95	0.8791	0.993321	ko00561	Os08g0359200(-);Os02g0646500(OS-ALDH)	K18693+K00128
Genetic Information Processing	Folding, sorting and degradation	Protein export	1	61	0.905039	0.993321	ko03060	Os05g0509500(-)	K03106
Genetic Information Processing	Translation	Aminoacyl-tRNA biosynthesis	1	64	0.915476	0.993321	ko00970	Os01g0185200(-)	K01886
Metabolism	Carbohydrate metabolism	Galactose metabolism	1	67	0.924771	0.993321	ko00052	Os05g0524400(OsPFK05)	K00850
Metabolism	Nucleotide metabolism	Pyrimidine metabolism	1	67	0.924771	0.993321	ko00240	Os12g0123500(-)	K14641
Metabolism	Amino acid metabolism	Arginine and proline metabolism	1	70	0.933048	0.993321	ko00330	Os02g0646500(OS-ALDH)	K00128
Metabolism	Carbohydrate metabolism	Pentose and glucuronate interconversions	1	82	0.958024	0.993321	ko00040	Os03g0757900(-)	K00012
Metabolism	Amino acid metabolism	Glycine, serine and threonine metabolism	1	84	0.96117	0.993321	ko00260	Os10g0516100(OsGDCH)	K02437
Cellular Processes	Transport and catabolism	Phagosome	1	93	0.972662	0.993321	ko04145	Os05g0413200(TUB6)	K07375
Metabolism	Carbohydrate metabolism	Pyruvate metabolism	1	95	0.974715	0.993321	ko00620	Os02g0646500(OS-ALDH)	K00128
Metabolism	Global and overview maps	Biosynthesis of amino acids	5	269	0.977467	0.993321	ko01230	Os05g0524400(OsPFK05);Os05g0555600(OsGLT2);Os12g0623900(-);Os04g0406600(-);Os05g0496200(OsPGK3)	K00850+K00264+K00549+K05359+K00927
Genetic Information Processing	Folding, sorting and degradation	Ubiquitin mediated proteolysis	2	158	0.984305	0.993321	ko04120	Os01g0719100(OsRZFP34);Os01g0819500(OsUBC22)	K10144+K06689
Genetic Information Processing	Folding, sorting and degradation	RNA degradation	1	128	0.993054	0.993321	ko03018	Os05g0524400(OsPFK05)	K00850
Metabolism	Amino acid metabolism	Cysteine and methionine metabolism	1	129	0.993321	0.993321	ko00270	Os12g0623900(-)	K00549

## Sheet:  ZJ22b-vs-ZJ22c
All enrichment pathways of mRNAs of the comparison between ZJ22b and ZJ22c.
KEGG_A_class	KEGG_B_class	Pathway	ZJ22b-vs-ZJ22c (12)	All (5841)	Pvalue	Qvalue	Pathway ID	Genes	K_IDs
Metabolism	Lipid metabolism	Biosynthesis of unsaturated fatty acids	2	41	0.0030349	0.0515933	ko01040	Os02g0716500(OsFAD2);Os10g0457600(-)	K10256+K07513
Metabolism	Global and overview maps	Fatty acid metabolism	2	91	0.0143154	0.0828289	ko01212	Os02g0716500(OsFAD2);Os10g0457600(-)	K10256+K07513
Metabolism	Energy metabolism	Photosynthesis	2	92	0.0146169	0.0828289	ko00195	Os07g0147500(PsbR);gene-psaB(-)	K03541+K02690
Metabolism	Energy metabolism	Photosynthesis - antenna proteins	1	17	0.0344037	0.146216	ko00196	Os01g0720500(Lhcb1.1)	K08912
Metabolism	Metabolism of cofactors and vitamins	Thiamine metabolism	1	23	0.0462848	0.157368	ko00730	Os05g0408900(CLA1)	K01662
Metabolism	Metabolism of cofactors and vitamins	Folate biosynthesis	1	34	0.0677194	0.183094	ko00790	Os01g0238500(-)	K18482
Metabolism	Amino acid metabolism	Valine, leucine and isoleucine degradation	1	52	0.101844	0.183094	ko00280	Os10g0457600(-)	K07513
Metabolism	Metabolism of cofactors and vitamins	Porphyrin and chlorophyll metabolism	1	52	0.101844	0.183094	ko00860	Os10g0389200(OsRCCR1)	K13545
Metabolism	Lipid metabolism	Fatty acid degradation	1	54	0.105564	0.183094	ko00071	Os10g0457600(-)	K07513
Metabolism	Metabolism of terpenoids and polyketides	Terpenoid backbone biosynthesis	1	60	0.116639	0.183094	ko00900	Os05g0408900(CLA1)	K01662
Metabolism	Lipid metabolism	alpha-Linolenic acid metabolism	1	61	0.118473	0.183094	ko00592	Os10g0457600(-)	K07513
Metabolism	Nucleotide metabolism	Pyrimidine metabolism	1	67	0.129402	0.183319	ko00240	Os01g0712700(-)	K01489
Genetic Information Processing	Translation	Ribosome	2	359	0.165689	0.216671	ko03010	Os09g0485900(-);Os03g0769100(WGL2)	K02940+K02996
Cellular Processes	Transport and catabolism	Peroxisome	1	102	0.190716	0.225697	ko04146	Os10g0457600(-)	K07513
Metabolism	Nucleotide metabolism	Purine metabolism	1	107	0.199145	0.225697	ko00230	Os05g0161500(-)	K00951
Metabolism	Global and overview maps	Metabolic pathways	7	2748	0.309888	0.329256	ko01100	Os05g0161500(-);Os02g0716500(OsFAD2);Os01g0712700(-);Os10g0457600(-);Os05g0408900(CLA1);Os01g0720500(Lhcb1.1);gene-psaB(-)	K00951+K10256+K01489+K07513+K01662+K08912+K02690
Metabolism	Global and overview maps	Biosynthesis of secondary metabolites	3	1549	0.65513	0.65513	ko01110	Os10g0389200(OsRCCR1);Os10g0457600(-);Os05g0408900(CLA1)	K13545+K07513+K01662
