# Supplementary material for: Whole-Transcriptome Analysis Reveals Autophagy Is Involved in Early Senescence of zj-es Mutant Rice
Source: Front Plant Sci. 2022 Jun 3;13:899054. doi: 10.3389/fpls.2022.899054 (PMC9204060; doi:10.3389/fpls.2022.899054)
Supplement: Supplementary file 13 [file Table_13.XLSX]

## Sheet: Table S16
Gene ID	seq	type	Forward primer	Universal Reverse Primer
Os05g0323900	ATGGCGCTCCGCACGCTGGCCTCGAGGAAAACCCTAGCCGCCGCGGCGCTGCCGCTGGCTGCGGCGGCGGCGGCGAGGGGTGTGACGACCGTCGCGCTCCCGGACCTCCCCTACGACTACGGCGCGCTGGAGCCGGCCATCTCCGGGGAGATCATGCGCCTGCACCACCAGAAGCACCACGCCACCTACGTCGCCAACTACAACAAGGCCCTCGAGCAGCTCGACGCCGCCGTCGCCAAGGGCGACGCCCCCGCCATCGTGCACCTCCAGAGCGCCATCAAGTTCAACGGCGGAGGCCATGTCAATCATTCGATCTTCTGGAATAACCTCAAGCCTATCAGCGAGGGTGGTGGTGATCCACCACATGCAAAACTTGGCTGGGCCATTGATGAGGATTTT…	mRNA	CTGCACCACCAGAAGCACCA	GATCACCACCACCCTCGCTG
Os08g0254500	ATGGCGGCCATGGCCACCCCGCAGCAATGCTGGCTCCCCACCCGCGCGCGCGCTCCCCCT CCTCCTCCTCCACGCGCACCCTCCTCCGCGTCCCCCGTCTCCGGAGCTCCCGCCTCCCTC CGCTTCCGTGGGCGCCGCGCCGCGTCGGCGTCGGCGTCGGCGGCGAGGAGGAGGAGGGGA GCCTCCCTGCCCTGCTCCCCCAGGTGCGCGTTGGAGACGGCTGGCCCTGGCTTTGATCCC CTAGGGCTGTACAACGATGGGCCTTCGAGGAATGACACGCAGTCCCCGCTGTCGAACTTC TTCGGAGTACTGTCGCCGGTGTTCGGGAGCTCGAGCGGCGGCAGGAAGGAGAAGTCCTAT GGACGAGGAGCAGCAGCTGCAATTGAAGATAGT…	mRNA	GCGGCAGGAAGGAGAAGTCC	ATCCCGGTTCACTCCACCCA
Os02g0791800	ATGGCGAGCAGCTCGTCGCCGCCGCCGCCGCCGCAGATTCGTTGCGCCTCCTTCAATCAG GACAACAGCTTGTTTTATGTCGGGACGAAGGATGGATTCAGGATTTTCGATGCCCATACA GGGAAGCTCCACTACCAGAAGAATATTGGTGGAATCGGCAATATGGAAATGTACTTTCGG ACAAACATTCTTGCTATAGTCGGAACTGGTGAACAGCCTGTACTATCTCCTCGCTGCCTT CGCCTTATCGACACCGTAGCAGCTGTCACAAAGAAAGATCTGAACTTTAAGACTTCAGTT TTGGCTGTTCGATTAAGTAGAACGAGGCTTGTTGTTGTATTGCAGGACAGGACCTTTATT TATGATGTAAACAGCACTACTATATTGGAAGAA…	mRNA	TTTGGCCATCCCAGCAAGCA	GATGGGTATGTTCCCCGCCG
Os09g0267600	TTTCCGTGCCTTTTCCCTCTTCCTCACCTGCCTGACCTGGCCTGGCCTGGCCCCCAATCAAAAACGAGCGACCTCAACCGACGGAATCCCCAACCCCAACCCCCAAAACCAATCCGCCGC CGCGCTGCCTCGCCTCGCTCGTCGCTCCCACCACCACCACAAACCCGCGCCTCCTCCGCCGCCGCACGCCCGCCCGCCGACGAATCAGAGTTTGGATTTAATATTACAGGCGCAGCCATG TTCAACAGGCTCTTTGGTAAGCCCAAGGAGCAGGCCAATGCTAGTGCGTTGGCCACGCTTGATAAGTTAAATGAGACCCTTGACATGCTGGAGAAGAAGGAGAAAGTCTTAGAGAAAAAG GCAGCCGCAGAACTGGAGAGGGCTAAGGAGTTCTCA…	mRNA	GCTCCCACCACCACCACAAA	CCTCTCCAGTTCTGCGGCTG
Os11g0605500	ATGGCCACCGCCGCCTCCCGCTCCGGCCGCCGACGCGGCGGCGGAGACGACGAAGACGAC CGGACGGCGGCGATGCGACGGCTGCGCGTGCTGTCCCTCCACCTGCAGGATCCGTCCCCC TCGTCGGAGGCGGGGCTGGCGCCCGCGGCGTGCGCGGCGGCGGGGAGGCGGCGGGCGACG GGGGGAGCGGACGCGGCGGCGGCGCTGGCGGCGTACCTGAGGGGGAGGCACCGGGACACG CAGGCGCGGGTGTTCGAGTTCTTCCTCTCGCGGCCCGACCTCCAGACGCCCGTCGAGATG TCCACCGCCGCGCACCGGGAGCTCTGCTTCCGGCAGCTGTGCGCGCTGGTGCGGGAGGCC GGGGTGCGCCCGCTCAGCCTCATGGCGAACGAC…	mRNA	GTGCGACCTTTACGCGCTTG	AGACTGCATGCCGATTGGGG
Os04g0398800	ATGGCGGAGGCGGGGCCCAGCCGGCCGgccgccgccgccgccgtcgccgccggcgacttc ccggagctcctcgccttctgcgcccgcgcggaggccctcatcgccgagctcctcctcctc tccgaccgcgccccgtcgcagttcgccgaccgccgcttccaccccgtcctcttcgacTTC CGATACTTCGACTCCCCGGGCGAATTCGAGGCGAGGATCGAGGGGAACATGGAGCTGGAG GCCCTGGAAGACGAGCTCCGCGAGTCCTGCGGCTCCTACATGCGGAGGTTCTTCGCCTTG CTGGATGCCGCCGTCGCTTACCACGACGAGCTGTGCAGCTACCTCAACGACCTGCAGGAA GGGCTGTATGTGCATTGCACATTGGATGGTGTA…	mRNA	ctcctcctcctctccgaccg	GACTCGCGGAGCTCGTCTTC
Os05g0159000	ATGTTCTTCTCCGGTGACCCGACGGCGAGGAAGCGGGTGGACCTCGGCGGGCGGAGCAGCAAGGAGCGGGACCGGCAGGTGCTGCTCGAGCAGACGCGGGAGGAGCGGCGGCGGCGGCTGGGCCTGCGCCTGCAGAACAGCTCCGCCACGAAGATCCAGAAATGCTTCAGAGGGAAGAGAGATTTGGAATTGGCACGTTCGGAAGTTCGAGGGAACTTTTGCTCTACTTTTGGGGAGCACTGCCAGAGGGTTGATTGGAGCAGTTTCGGTGCTAATTCTGATTTCCTTCGTCAATTCCTGTTCTTCTTCAATGCAAAGAAAGACAGTGATATTGCTATACTCTGTCAAGTCTGCAATTTGCTGTTATATTATGTCAAACATGGTGGAGATGTTCTAAGA…	mRNA	AGGCTGGGATTGACGGAGGT	GCCTTCCCAAGGAGACTGCC
Os09g0394100	ATGACCAGGAACCACTCCCCCAAGTCCCTCGCCGTCCTCCTCCGCGCCCGGATGCACCCC GACCCCGTCTCCCCCGCCCCGCCGCCGCCCGCTCCGACGGCGGCGGCGGCACCCGACCCC GATCCGTCCGCCCCGCCCGCCGCCGCCGCCGTCCGCCACTGGCTCCACGCCTCCGTCTCC TCCTCCGCCTCCACCGCCCTCGACCGCTTCTCCGACGGCTACCGCTCCCTCGACCGCCCC GGCCGCCGCGAGATCCTCCGCTCCCTCGCGGCCGACTACGACGTGCCCCGCGCGCGCGTC CGCGACCTCATGCGGCAGTATCTGAGCGCCGCGGCGGCGGGCGGGGAGGAGGAGGAAGAG GAGCACCCGGAGGCGGGAGGCGGCGGCGGCTCT…	mRNA	CGGGGAGGAGGAGGAAGAGG	GAGGAACCCGGCGTACTTGG
Os03g0268200	ATGGGGGACCGCGCCGCGGGGAGCGGCGGCGGGGGAGGGGGAGGAAGCGGCGTGCGGAGG GTAGGGGACTACGTGCTGGTGCGGCAGATCGGGTCGGGGGCGTACGCGCGGGTCTGGCTC GGGAAGCACCGCACGCGGGGCACGGAGGTGGCCTTGAAGGAGATCGCCGTGGAGCGGCTT AGCAGCAAGCTCCGCGAGAGCCTCCTCTCCGAGGTCGACATCCTCCGGCGCATCCGTCAT CCCAACGTCATCGCCCTCCACGAGTCCATCAGGGATGGTGGGAAAATATATCTTGTATTA GAGTACTGTCGAGGTGGTGACTTACACTCATACCTTCAGCAGCATAAAAGGGTTTCTGAA ACAGTTGCTAAGCATTTCATCCAGCAGCTAGCA…	mRNA	GAAGGAGATCGCCGTGGAGC	CGCAGCATCTGCAGACCAGA
Os01g0585400	ATGGCGGGGGACCCGGCGGCGGCGGCAGCGGCGGTTGGGGCGATGAGGCCGTGGAACTAC GTGGTGACGGCGCACAAGCTGACGGTCGTCGCCCGCTCCTGCGTCGGCAACTTCACCGCG CCCGATCACCTCGACCTCTCGAAATTTACCCGTATTGAGATTGGAGTATCTGCTTACTCA TCAGGGTCTTCAGGTCAGACAGATTTGCCTCGACCAGAATATGTTCCTTCTGTTTGA	mRNA	GCTGACAGGTCCCCTTGTGATTC	GGCAAGTCGTCCAGAAGGAGAAG
MSTRG.1973.1	ACAGAGAAGCTATCCACAGTGTATTAACTGGTGAAAAACTGAAAAATGCTACCGTTTGCGATGGTTTGGT TTTTCAGTGACTTAGCTATGCTCGGATGAGTGCTGGCCGTTTGCTGACAGGTCCCCTTGTGATTCTTCAG CATTCTGGCTCGAATTAGCCTCTTCCATGGGCTTCATCTCTAGCTTCTTCTTCTCCTTCTGGACGACTTG CCTAGGCATCACCTCCAGGATGAAGCTTCCACCGTTCCATGTCGACGCGCACACCTT	lncRNA	GCCAACTAACAAAATTTCTGAGCG	TGAGAATGTTTTGCAGTGCTCAT
MSTRG.21623.1	AGCTCTTTGTCATCATATGGAGCATATATACGTCCAGTGCCATATCCGAATGAGGTCGGTTTGCGAATGC TTATAGGTGGTGCTGCACGGGAAGCTGCTATTCTGGGATTTCACATTACTCCATTGTTCTCATACTATGC ATATCATGGCCCTATTTTTCGAGTCATGGTACAGTTACATAATGGAAAACAAGATGGCATCAGTAATTAT GGTTTCATTTGCCATTGCAAAAGTTGTGGCCAGTCACGGACTTTTGGATTTGATGAGTTGGGGCAGATTA CTTGTGGTTGTGCAGACAAAATTGATCCCGATTCGATCACTG	lncRNA	GGACCGTTTTTCTGTTGGCG	TTGTCAAACACCTCCTGGGG
MSTRG.28948.2	GCCGGACCTAACCCACGCCGTGCCGgccgccagacgccactgctccgcccgcctgaattcaccgccgccg ccctcccccacgccgccatctccacggccctcccacgccaccgaagccacgccgccgcgccgcccgcctc acctcaccgctgagccgcacTTCCCCCCGCTGCCTCCTCAACTCCTCGCCGCCGGCCGGTACCCTACTCC GCTTGCAACCGTCGCCATCGGAGCCGTGGATCCGTCGCCGCCCTGAATTTCACCTGCATCCGCCCGCTTG TGACGTGTTTGAttttttttttGTCCCCGGTGATTCGATTCAAATTCAATCTGATCCTTTGTTGGTTTTG AttttttttGTGTTCTATATGTTGTTCCCTGTGGTCGTCCTTTC…	lncRNA	GCCACACCCCATCCTATTCC	AGGTCCTCCCGAATCCGAA
MSTRG.18570.1	TTCCAAGCTGAGGTTGTAGGTTCTATTGGTGGTTGTTCCCCGTTTCCTTGTTAATTTTCTTGATTTTGTT ACCTCCCTGCCGCTAAGATTGCTTATGCGGTAACATGCAATTTTTGATGGTGATATTTGTTCCTTTGATT GGATTTCATGGATCCAACAAGAGGAACATAACTCAATCACAAATTTGATCAAATCCAAGTAGCACCGTGC CGTTC	lncRNA	CCAAGTCTGCGAACCACCTT	ATGAACAACAGCCACATGCC
MSTRG.31067.2	TGTTTGGACATGGAGAGGCCTCCAAAAGACTGGACTGTTCATCGACTGAAGTCCACTTGATCTCTCCATC CTCGATCGATCAGTGAGTGAGTGAGATTGTAGCTGCAATGATGGTGGTTGGAGAAGTGAGAGAGCATATG CATCCAGTGTTGCCGTGTACTGACTCTCACATGGCTGAGCATCTGGGGCAGTACTGCCTTTAATTTCCCC CTGCTGAAAGCTGATGGGtttttttATGCTAATTAAGCACGCCCCTTTTCTGCCTGTCCACTTCAGTCTT GCATGCACCCCTGCTAGCTTCAGGATTAGTTTTCCTTTCAGCATTTTGAACCATACATGCAGCTGACCCT TCACAGAAGGGATGACAGAATCATTGAAAACATCCAAAAATTAA…	lncRNA	ACCATACATGCAGCTGACCC	ACAGATCACTGCGGTTGTGT
MSTRG.31067.1	TGTTTGGACATGGAGAGGCCTCCAAAAGACTGGACTGTTCATCGACTGAAGTCCACTTGATCTCTCCATC CTCGATCGATCAGTGAGTGAGTGAGATTGTAGCTGCAATGATGGTGGTTGGAGAAGTGAGAGAGCATATG CATCCAGTGTTGCCGTGTACTGACTCTCACATGGCTGAGCATCTGGGGCAGTACTGCCTTTAATTTCCCC CTGCTGAAAGCTGATGGGtttttttATGCTAATTAAGCACGCCCCTTTTCTGCCTGTCCACTTCAGTCTT GCATGCACCCCTGCTAGCTTCAGGATTAGTTTTCCTTTCAGCATTTTGAACCATACATGCAGCTGACCCT TCACAGAAGGGATGACAGAATCATTGAAAACATCCAAAAATTAA…	lncRNA	GTCGATCTCCCTGATGCTGG	CCAGGACAAGAAATGCCCGA
MSTRG.14864.2	GGTACAGTTACCTGAAGGATGAAGTAGTATTAACAAAGCATAGCTTCGTCTAGATTGCTGAGAAGGAAGT CGAGAAGGATTCCCTCGTTAACCGCTTGAACGACCTTGAGCGGAATATAGTACCCTCCTTGAAAAAGGCT GTGAATGACATTTCTTTGGAGAAAGATGCCGCAGCTGTTGCTAAGGTACTTGACTGTCTTCGTGTTTATG GTATTCACGATTCTGATATGTCTAATCCCCATTATCACTTCTACCTGGTATGCTAAGTAGGAGGATGCTC TCGCACAACTAAGGAGCATGAAGAAACGACTGAAGGAGGCAGAAGAGGAGCAATACAGGGTATTTTGAAA AATTGTGCATCCTTAGTCATATCATTAGTGTGCTAATCTTATGA…	lncRNA	CATTCATGTGCAGTGGCGGC	GTACTTGTTCAGCCCGGCGT
miR11418-z	CCACCGCCGCCGCCGCCT	miRNA	TATATATACCACCGCCGCCGC	U
miR4993-z	GGCGGCGGCGGTGGAGAA	miRNA	TATATATATAGGCGGCGGCGGTGG	U
miR5084-x	GATCCTCTGCAGTACTGCAC	miRNA	CCGATCCTCTGCAGTACTGCAC	U
miR1510-y	CGGAGGAATAGGAAAAAC	miRNA	CGCGCGGAGGAATAGGAAAAAC	U
miR6108-z	GGGGAGAAGGGGAAGAAG	miRNA	GCGGGGAGAAGGGGAAGAA	U
miR5215-z	AATGAGGATGAGCTACGTG	miRNA	CGCGAATGAGGATGAGCTACGTG	U
miR2102-x	CGAGGCGCCGCCGCCACC	miRNA	TATATACGAGGCGCCGCCG	U
OsActin-(122)			GAGTATGATGAGTCGGGTCCAG	ACACCAACAATCCCAAACAGAG

## Sheet: Peroxisome
Peroxisome
Differentially expressed genes	FPKM(zj-es/ZJ22)			desc
	a	b	c
Os01g0654500	12.369	9.43036	6.67838	IDH1, IDH2, icd; isocitrate dehydrogenase [EC:1.1.1.42]
Os04g0508200	2.28924	2.91738	2.36787	IDH1, IDH2, icd; isocitrate dehydrogenase [EC:1.1.1.42]
Os03g0429800	1.6487	3.34093	2.77765	XDH; xanthine dehydrogenase/oxidase [EC:1.17.1.4 1.17.3.2]
Os11g0605500	5.11461	15.4649	26.2685	E1.3.3.6, ACOX1, ACOX3; acyl-CoA oxidase [EC:1.3.3.6]
Os05g0163700	2.0361	3.60586	3.15915	E1.3.3.6, ACOX1, ACOX3; acyl-CoA oxidase [EC:1.3.3.6]
Os06g0354500	3.25724	4.36434	8.99803	E1.3.3.6, ACOX1, ACOX3; acyl-CoA oxidase [EC:1.3.3.6]
Os06g0347100	1.60101	2.26959	2.75556	E1.3.3.6, ACOX1, ACOX3; acyl-CoA oxidase [EC:1.3.3.6]
Os03g0708100	2.507	6.83273	5.53498	PHYH; phytanoyl-CoA hydroxylase [EC:1.14.11.18]
Os08g0502700	1.4762	0.486112	0.390001	AGXT; alanine-glyoxylate transaminase / serine-glyoxylate transaminase / serine-pyruvate transaminase [EC:2.6.1.44 2.6.1.45 2.6.1.51]
Os10g0329300	1.53362	2.11577	2.14457	E2.7.1.36, MVK, mvaK1; mevalonate kinase [EC:2.7.1.36]
Os09g0394100	4.625	10.211	17.4168	MLYCD; malonyl-CoA decarboxylase [EC:4.1.1.9]
Os01g0269000	2.13893	5.64376	3.94317	E4.1.3.4, HMGCL, hmgL; hydroxymethylglutaryl-CoA lyase [EC:4.1.3.4]
Os05g0317200	1.78375	2.94403	6.91571	ACSL, fadD; long-chain acyl-CoA synthetase [EC:6.2.1.3]
Os01g0681200	3.20833	6.51111	8.21345	ACSL, fadD; long-chain acyl-CoA synthetase [EC:6.2.1.3]
Os11g0147000	2.2126	4.73753	7.31385	ACSL, fadD; long-chain acyl-CoA synthetase [EC:6.2.1.3]
Os01g0655800	2.1212	3.245	8..44	ACSL, fadD; long-chain acyl-CoA synthetase [EC:6.2.1.3]
Os06g0727200	3.48712	7.25499	9.44473	katE, CAT, catB, srpA; catalase [EC:1.11.1.6]
Os02g0115700	5.65358	22.1602	23.158	katE, CAT, catB, srpA; catalase [EC:1.11.1.6]
Os05g0323900	2.15669	5.80496	14.0661	SOD2; superoxide dismutase, Fe-Mn family [EC:1.15.1.1]
Os03g0351500	1.93445	2.0118	1.85092	SOD1; superoxide dismutase, Cu-Zn family [EC:1.15.1.1]
Os07g0665200	2.93714	6.464	9.28197	SOD1; superoxide dismutase, Cu-Zn family [EC:1.15.1.1]
Os08g0561700	1.49177	3.39766	8.97216	SOD1; superoxide dismutase, Cu-Zn family [EC:1.15.1.1]
Os05g0275700	4.0411	6.68627	1.95035	PEX2, PXMP3; peroxin-2
Os02g0817700	1.54155	2.82543	3.02332	ACAA1; acetyl-CoA acyltransferase 1 [EC:2.3.1.16]
Os03g0829100	2.68629	3.60746	3.40079	EPHX2; soluble epoxide hydrolase / lipid-phosphate phosphatase [EC:3.3.2.10 3.1.3.76]
Os09g0133200	2.89615	4.92415	2.94664	DHRS4; dehydrogenase/reductase SDR family member 4 [EC:1.1.-.-]
Os03g0786100	0.989324	2.72001	5.58442	HAO; (S)-2-hydroxy-acid oxidase [EC:1.1.3.15]
Os07g0152900	1.98644	3.5086	23.3878	HAO; (S)-2-hydroxy-acid oxidase [EC:1.1.3.15]
Os07g0616500	1.27007	14.7162	12.5935	HAO; (S)-2-hydroxy-acid oxidase [EC:1.1.3.15]
Os04g0623500	7.29907	31.4378	44.1608	HAO; (S)-2-hydroxy-acid oxidase [EC:1.1.3.15]
Os01g0505400	1.26842	2.75568	3.24464	HACL1; 2-hydroxyacyl-CoA lyase 1 [EC:4.1.-.-]
Os01g0925200	2.30991	3.11545	2.07973	ECH1; Delta3,5-Delta2,4-dienoyl-CoA isomerase [EC:5.3.3.21]
Os04g0614000	1.68065	2.09223	2.5127	DECR2; peroxisomal 2,4-dienoyl-CoA reductase [EC:1.3.1.34]
Os02g0123200	1.21308	2.30505	2.79487	PEX16; peroxin-16
Os09g0314300	1.64882	1.67656	1.74963	PEX3; peroxin-3
Os02g0661000	0.717724	1.12	1.64	PEX19; peroxin-19
Os04g0617600	1.50697	2.34664	1.76065	PEX6, PXAAA1; peroxin-6
Os08g0500100	1.45819	2.30856	2.5189	PEX5, PXR1; peroxin-5
Os05g0101200	0.98262	1.00168	1.33907	PEX14; peroxin-14
Os10g0467200	1.33991	2.40241	2.13606	PEX12, PAF3; peroxin-12
Os07g0608800	1.08882	1.76167	2.26433	PEX10; peroxin-10
Os01g0730800	1.12592	1.35782	1.25907	MPV17; protein Mpv17
Os01g0228300	1.15443	2.09045	1.70637	MPV17; protein Mpv17
Os03g0265300	3.7512	9.97846	9.78532	SLC25A17, PMP34; solute carrier family 25 (peroxisomal adenine nucleotide transporter), member 17
Os08g0557800	4.36364	135.25	47.5152	FAR; alcohol-forming fatty acyl-CoA reductase [EC:1.2.1.84]
Os05g0209400	1.69524	1.89846	3.9959	NUDT7; peroxisomal coenzyme A diphosphatase NUDT7 [EC:3.6.1.-]

## Sheet: Autophagy
Autophagy - other eukaryotes
Differentially expressed genes	FPKM(zj-es/ZJ22)			desc
	a	b	c
Os05g0180600	1.29468	1.82957	2.07934	PIK3C3, VPS34; phosphatidylinositol 3-kinase [EC:2.7.1.137]
Os08g0307400	1.20241	0.979787	1.5494	PIK3C3, VPS34; phosphatidylinositol 3-kinase [EC:2.7.1.137]
Os02g0217600	1.92713	1.97776	1.94462	PPP2C; serine/threonine-protein phosphatase 2A catalytic subunit [EC:3.1.3.16]
Os03g0167700	1.76067	2.07229	2.39735	PPP2C; serine/threonine-protein phosphatase 2A catalytic subunit [EC:3.1.3.16]
Os05g0235300	2.2669	2.24331	2.1066	MTOR, FRAP, TOR; serine/threonine-protein kinase mTOR [EC:2.7.11.1]
Os11g0109933	1.92	2.37229	2.33769	RAPTOR; regulatory associated protein of mTOR
Os12g0110000	1.55188	0.876221	0.655236	RAPTOR; regulatory associated protein of mTOR
Os03g0681700	1.61887	1.8657	1.99281	MLST8, GBL; target of rapamycin complex subunit LST8
Os03g0122000	1.19557	1.12049	1.38283	ULK2, ATG1; serine/threonine-protein kinase ULK2 [EC:2.7.11.1]
Os03g0268200	4.14603	10.5895	16.8464	ULK2, ATG1; serine/threonine-protein kinase ULK2 [EC:2.7.11.1]
Os02g0179800	1.25544	1.47387	3.14245	ATG11; autophagy-related protein 11
Os11g0162000	3.21825	6.95238	13.0437	ATG13; autophagy-related protein 13
Os02g0644500	2.39219	2.54919	8.08276	ATG13; autophagy-related protein 13
Os03g0644000	1.48046	3.26768	4.20741	BECN, VPS30, ATG6; beclin
Os01g0681400	2.42995	1.77555	1.63046	BECN, VPS30, ATG6; beclin
Os01g0614900	1.17354	7.43785	14.8994	ATG7; ubiquitin-like modifier-activating enzyme ATG7
Os04g0624000	0.983523	1.51447	5.51245	GABARAP, ATG8, LC3; GABA(A) receptor-associated protein
Os07g0512200	1.85133	2.73209	5.83761	GABARAP, ATG8, LC3; GABA(A) receptor-associated protein
Os08g0191600	1.15779	1.48317	12.5464	GABARAP, ATG8, LC3; GABA(A) receptor-associated protein
Os11g0100100	2.29245	6.34532	13.6219	GABARAP, ATG8, LC3; GABA(A) receptor-associated protein
Os04g0682000	0.906487	1.36239	1.69587	ATG4; cysteine protease ATG4 [EC:3.4.22.-]
Os01g0200000	2.5	3.17131	3.11507	ATG3; ubiquitin-like-conjugating enzyme ATG3
Os04g0497350	2.14286	2.25238	1.65798	ATG10L, ATG10; ubiquitin-like-conjugating enzyme ATG10
Os03g0746600	0.515837	1.79386	3.8254	ATG16L1; autophagy-related protein 16-1
Os03g0248000	1.27808	2.88927	3.01079	ATG9; autophagy-related protein 9
Os10g0163100	1.6285	2.19215	2.27741	ATG9; autophagy-related protein 9
Os02g0791800	2.50725	5.34786	9.2232	WIPI1_2, ATG18; autophagy-related protein 18
Os12g0446700	1.52196	2.26047	2.07566	ATG101; autophagy-related protein 101

## Sheet:  Phagosome
Phagosome
Differentially expressed genes	FPKM(zj-es/ZJ22)			desc
	a	b	c
Os05g0180600	1.29468	1.82957	21.0793	PIK3C3, VPS34; phosphatidylinositol 3-kinase [EC:2.7.1.137]
Os08g0307400	1.20241	0.979787	1.5494	PIK3C3, VPS34; phosphatidylinositol 3-kinase [EC:2.7.1.137]
Os08g0450800	1.49367	1.64874	1.89034	PIKFYVE, FAB1; 1-phosphatidylinositol-3-phosphate 5-kinase [EC:2.7.1.150]
Os08g0450700	1.39645	1.72971	2.28371	PIKFYVE, FAB1; 1-phosphatidylinositol-3-phosphate 5-kinase [EC:2.7.1.150]
Os06g0259000	1.9	4.28822	2.90456	PIKFYVE, FAB1; 1-phosphatidylinositol-3-phosphate 5-kinase [EC:2.7.1.150]
Os09g0402300	1.29195	0.437303	0.381124	PIKFYVE, FAB1; 1-phosphatidylinositol-3-phosphate 5-kinase [EC:2.7.1.150]
Os12g0236700	1.83259	2.56776	2.77762	PIKFYVE, FAB1; 1-phosphatidylinositol-3-phosphate 5-kinase [EC:2.7.1.150]
Os08g0428900	1.12988	1.71534	2.1519	PIKFYVE, FAB1; 1-phosphatidylinositol-3-phosphate 5-kinase [EC:2.7.1.150]
Os08g0104700	6.48295	7.36543	6.26384	PIKFYVE, FAB1; 1-phosphatidylinositol-3-phosphate 5-kinase [EC:2.7.1.150]
Os06g0662000	1.80024	3.01671	2.91066	ATPeV1A, ATP6A; V-type H+-transporting ATPase subunit A [EC:7.1.2.2]
Os02g0175400	0.904899	2.58911	4.55856	ATPeV1A, ATP6A; V-type H+-transporting ATPase subunit A [EC:7.1.2.2]
Os01g0587000	2.21716	3.42588	3.39452	ATPeV0D, ATP6D; V-type H+-transporting ATPase subunit d
Os01g0711000	0.316188	1.44306	4.71327	ATPeV1B, ATP6B; V-type H+-transporting ATPase subunit B
Os06g0568200	1.93343	2.91161	2.73302	ATPeV1B, ATP6B; V-type H+-transporting ATPase subunit B
Os05g0593100	2.61369	3.30249	3.05999	ATPeV1C, ATP6C; V-type H+-transporting ATPase subunit C
Os01g0659200	1.67929	2.69935	2.78417	ATPeV1E, ATP6E; V-type H+-transporting ATPase subunit E
Os01g0222500	1.09199	1.72277	2.47813	ATPeV1E, ATP6E; V-type H+-transporting ATPase subunit E
Os04g0137500	3.13895	3.49241	3.42186	ATPeV1F, ATP6S14; V-type H+-transporting ATPase subunit F
Os02g0824700	1.87808	2.83507	3.6348	ATPeV1F, ATP6S14; V-type H+-transporting ATPase subunit F
Os04g0601700	0	7.20243	1.0379	ATPeV1G, ATP6G; V-type H+-transporting ATPase subunit G
Os03g0251500	0.952517	1.57629	1.95464	ATPeV0A, ATP6N; V-type H+-transporting ATPase subunit a
Os01g0834200	3.54509	4.63501	5.29099	ATPeV0A, ATP6N; V-type H+-transporting ATPase subunit a
Os10g0184300	0.284729	2.59556	21.8772	ATPeV0A, ATP6N; V-type H+-transporting ATPase subunit a
Os02g0550100	2.55745	2.61241	3.54386	ATPeV0C, ATP6L; V-type H+-transporting ATPase 16kDa proteolipid subunit
Os11g0169900	2.24943	3.1268	2.70894	ATPeV0C, ATP6L; V-type H+-transporting ATPase 16kDa proteolipid subunit
Os12g0168900	2.08504	4.16977	4.30943	ATPeV0C, ATP6L; V-type H+-transporting ATPase 16kDa proteolipid subunit
Os01g0610100	1.76751	2.96014	2.2859	ATPeV0B, ATP6F; V-type H+-transporting ATPase 21kDa proteolipid subunit
Os06g0234200	0.473088	2.72593	3.70968	RAC1; Ras-related C3 botulinum toxin substrate 1
Os02g0742200	2.19118	4.72606	4.07205	RAC1; Ras-related C3 botulinum toxin substrate 1
Os02g0178400	2.85671	3.04976	2.26669	SEC61G, SSS1, secE; protein transport protein SEC61 subunit gamma and related proteins
Os01g0805900	1.15942	0.688889	0.160988	TUBB; tubulin beta
Os10g0441800	15.8208	5.46771	3.89006	RAB5C; Ras-related protein Rab-5C
Os12g0631100	2.06993	2.59855	3.26683	RAB5C; Ras-related protein Rab-5C
Os03g0666500	1.71152	6.62635	12.0852	RAB5C; Ras-related protein Rab-5C
Os01g0227300	1.04922	2.22862	6.8323	RAB7A; Ras-related protein Rab-7A
Os05g0516600	1.61069	2.9301	3.01793	RAB7A; Ras-related protein Rab-7A
Os01g0714900	0.887225	2.30151	1.50245	RAB7A; Ras-related protein Rab-7A
Os05g0536900	1.92641	1.37525	2.48544	RAB7A; Ras-related protein Rab-7A
Os01g0254900	1.21514	2.12695	2.07594	STX7; syntaxin 7
Os04g0530400	1.5316	1.61728	1.48065	STX18; syntaxin 18
Os03g0791500	3.45714	16.5578	4.46465	SEC22; vesicle transport protein SEC22
Os08g0254500	1.78963	4.67953	9.67614	SEC61A; protein transport protein SEC61 subunit alpha

## Sheet: Endocytosis
Endocytosis
Differentially expressed genes	FPKM(zj-es/ZJ22)			desc
	a	b	c
Os02g0822500	1.63011	2.25026	2.16917	PIP5K; 1-phosphatidylinositol-4-phosphate 5-kinase [EC:2.7.1.68]
Os05g0358700	2.03769	1.98565	3.20749	PLD1_2; phospholipase D1/2 [EC:3.1.4.4]
Os01g0310100	1.29878	3.1	4.32407	PLD1_2; phospholipase D1/2 [EC:3.1.4.4]
Os01g0172400	1.74766	3.14364	3.17718	PLD1_2; phospholipase D1/2 [EC:3.1.4.4]
Os06g0604400	1.28829	2.03635	2.59433	PLD1_2; phospholipase D1/2 [EC:3.1.4.4]
Os01g0840100	2.48401	7.53434	9.72093	HSPA1s; heat shock 70kDa protein 1/2/6/8
Os05g0460000	1.12618	2.62992	2.45626	HSPA1s; heat shock 70kDa protein 1/2/6/8
Os11g0557900	2.89231	2.99026	2.73737	ARPC5; actin related protein 2/3 complex, subunit 5
Os03g0848300	1.39554	1.12851	2.79823	ARPC4; actin related protein 2/3 complex, subunit 4
Os02g0235000	1.20917	2.42361	2.74536	ARPC3; actin related protein 2/3 complex, subunit 3
Os02g0817200	2.368	1.32512	1.09642	ARPC1A_B; actin related protein 2/3 complex, subunit 1A/1B
Os10g0441800	15.8208	5.46771	3.89006	RAB5C; Ras-related protein Rab-5C
Os12g0631100	2.06993	2.59855	3.26683	RAB5C; Ras-related protein Rab-5C
Os03g0666500	1.71152	2.62635	3.08519	RAB5C; Ras-related protein Rab-5C
Os01g0227300	1.04922	2.22862	2.8323	RAB7A; Ras-related protein Rab-7A
Os05g0516600	1.61069	2.9301	3.01793	RAB7A; Ras-related protein Rab-7A
Os01g0714900	0.887225	2.30151	1.50245	RAB7A; Ras-related protein Rab-7A
Os05g0536900	1.92641	1.37525	2.48544	RAB7A; Ras-related protein Rab-7A
Os07g0239400	1.96444	2.93039	3.09498	RAB8A, MEL; Ras-related protein Rab-8A
Os05g0461300	1.8285	2.06576	2.20657	RAB8A, MEL; Ras-related protein Rab-8A
Os03g0843100	0.933191	1.81562	1.64201	RAB11A; Ras-related protein Rab-11A
Os09g0327100	3.31818	3.45122	9.17949	RAB11A; Ras-related protein Rab-11A
Os09g0527600	15.9286	6.42286	6.38164	RAB11A; Ras-related protein Rab-11A
Os07g0414800	0.345455	1.83949	5.69802	CAPZA; capping protein (actin filament) muscle Z-line, alpha
Os03g0381200	1.219	1.56175	1.39119	CAPZB; capping protein (actin filament) muscle Z-line, beta
Os09g0484300	1.92484	2.66127	3.1823	NEDD4, RSP5; E3 ubiquitin-protein ligase NEDD4 [EC:2.3.2.26]
Os02g0690700	2.75585	2.64247	2.77134	AP2M1; AP-2 complex subunit mu-1
Os01g0338200	1.49524	2.2831	2.75654	STAMBP, AMSH; STAM-binding protein [EC:3.4.19.12]
Os01g0499300	1.59213	3.11504	2.5601	STAMBP, AMSH; STAM-binding protein [EC:3.4.19.12]
Os03g0572300	4.87179	2.69543	1.7411	VPS37; ESCRT-I complex subunit VPS37
Os03g0186800	2.23645	1.91102	11.4444	VPS37; ESCRT-I complex subunit VPS37
Os01g0658500	1.31754	1.89098	2.27143	VPS25, EAP20; ESCRT-II complex subunit VPS25
Os01g0813500	1.35528	1.04501	1.14113	VPS36, EAP45; ESCRT-II complex subunit VPS36
Os03g0108400	3.88571	3.61506	3.18237	VPS24, CHMP3; charged multivesicular body protein 3
Os09g0267600	2.49282	3.17474	7.17141	CHMP4, SNF7, VPS32; charged multivesicular body protein 4
Os06g0608500	1.8313	2.50403	2.17999	CHMP4, SNF7, VPS32; charged multivesicular body protein 4
Os02g0596500	0.866667	4.45192	3.15455	CHMP6, VPS20; charged multivesicular body protein 6
Os01g0141100	2.20893	2.3687	2.10306	VPS4; vacuolar protein-sorting-associated protein 4
Os01g0102900	1.61152	0.856325	0.509674	CHMP5, VPS60; charged multivesicular body protein 5
Os10g0495300	1.88951	2.46607	2.4425	PDCD6IP, ALIX, RIM20; programmed cell death 6-interacting protein
Os01g0738600	2.07226	6.67695	5.37324	EPN; epsin
Os02g0806600	2.21806	3.07109	3.94126	EPN; epsin
Os02g0437800	2.44921	2.47789	2.92321	VPS45; vacuolar protein sorting-associated protein 45
Os06g0687800	1.4096	1.80964	1.99673	EHD1; EH domain-containing protein 1
Os07g0563800	1.31649	1.5238	1.58328	SMAP; stromal membrane-associated protein
Os02g0722500	2.50699	1.99126	2.91202	SMAP; stromal membrane-associated protein
Os10g0574800	1.75379	2.61802	2.34138	ARFGAP2_3; ADP-ribosylation factor GTPase-activating protein 2/3
Os01g0862300	1.87995	2.91299	4.79455	SNX1_2; sorting nexin-1/2
Os02g0193800	1.65278	2.96952	18.1885	ARFGEF, BIG; brefeldin A-inhibited guanine nucleotide-exchange protein
Os03g0666100	3.71845	2.53043	2.59398	GBF1; golgi-specific brefeldin A-resistance guanine nucleotide exchange factor 1
Os04g0398800	0.100866	0.624638	1.79545	RTSC, SPG8; WASH complex subunit strumpellin
Os06g0136700	1.69767	1.68254	3.39595	MRT43, SWIP; WASH complex subunit 7
Os11g0629200	2.25772	2.80578	3.24854	VPS26; vacuolar protein sorting-associated protein 26
Os03g0801600	3.0677	2.92005	3.64257	VPS35; vacuolar protein sorting-associated protein 35
Os10g0169800	1.29351	1.5919	2.12209	SPG21; maspardin
Os01g0687700	2.18537	2.65066	3.60023	IST1; vacuolar protein sorting-associated protein IST1
Os08g0175200	1.79094	3.68764	4.52024	IST1; vacuolar protein sorting-associated protein IST1
Os01g0706400	2.92414	2.08256	2.22977	IST1; vacuolar protein sorting-associated protein IST1

## Sheet: Ubiquitin mediated proteolysis
Ubiquitin mediated proteolysis
Differentially expressed genes	FPKM(zj-es/ZJ22)			desc
	a	b	c
Os05g0149900	2.12914	1.94112	2.34878	APC7; anaphase-promoting complex subunit 7
Os05g0149600	1.7514	1.95681	1.95028	CUL1, CDC53; cullin 1
Os01g0369000	1.9463	2.5339	3.01704	CUL1, CDC53; cullin 1
Os02g0746000	1.77586	1.58186	1.28326	CUL3; cullin 3
Os08g0170900	1.43911	0.402647	1.30826	CUL3; cullin 3
Os04g0643000	1.32938	2.34339	2.43156	CUL3; cullin 3
Os01g0585400	0.293443	0.603518	1.32143	DDB1; DNA damage-binding protein 1
Os01g0141700	0.903727	1.12896	1.20943	DDB2; DNA damage-binding protein 2
Os01g0104600	1.06181	3.15155	5.52269	DET1; de-etiolated-1
Os01g0925800	1.05081	1.26327	1.2621	HIP2, UBC1; ubiquitin-conjugating enzyme (huntingtin interacting protein 2) [EC:2.3.2.23]
Os09g0252800	2.20204	2.73847	3.06458	HUWE1, MULE, ARF-BP1; E3 ubiquitin-protein ligase HUWE1 [EC:2.3.2.26]
Os09g0252700	2.02494	3.36008	3.03915	HUWE1, MULE, ARF-BP1; E3 ubiquitin-protein ligase HUWE1 [EC:2.3.2.26]
Os01g0374900	2.13911	2.18084	2.2285	MGRN1; E3 ubiquitin-protein ligase MGRN1 [EC:2.3.2.27]
Os09g0484300	1.92484	2.66127	3.1823	NEDD4, RSP5; E3 ubiquitin-protein ligase NEDD4 [EC:2.3.2.26]
Os06g0164000	1.40024	2.14483	2.19585	PIAS1; E3 SUMO-protein ligase PIAS1 [EC:2.3.2.-]
Os02g0708300	1.09554	2.40554	1.91087	RBX1, ROC1; RING-box protein 1 [EC:2.3.2.32]
Os10g0456800	0.724	1.96435	3.46468	RCHY1, PIRH2; RING finger and CHY zinc finger domain-containing protein 1 [EC:2.3.2.27]
Os03g0348900	6.18182	68.0526	113.937	RCHY1, PIRH2; RING finger and CHY zinc finger domain-containing protein 1 [EC:2.3.2.27]
Os02g0771100	1.37643	1.27996	1.30571	RFWD2, COP1; E3 ubiquitin-protein ligase RFWD2 [EC:2.3.2.27]
Os02g0293400	1.6333	2.40873	2.09265	SIAH1; E3 ubiquitin-protein ligase SIAH1 [EC:2.3.2.27]
Os03g0356414	2.21501	3.46711	3.15907	SIAH1; E3 ubiquitin-protein ligase SIAH1 [EC:2.3.2.27]
Os12g0594600	1.84168	3.03427	4.01418	SKP1, CBF3D; S-phase kinase-associated protein 1
Os05g0425700	1.11622	1.49231	1.44822	SKP2, FBXL1; F-box and leucine-rich repeat protein 1 (S-phase kinase-associated protein 2)
Os05g0104900	0.770677	1.14553	3.06667	STUB1, CHIP; STIP1 homology and U-box containing protein 1 [EC:2.3.2.27]
Os06g0301000	1.73223	2.49522	2.54854	SYVN1, HRD1; E3 ubiquitin-protein ligase synoviolin [EC:2.3.2.27]
Os05g0463900	2.41899	2.33913	1.88951	TRIP12; E3 ubiquitin-protein ligase TRIP12 [EC:2.3.2.26]
Os02g0101700	1.92996	2.12784	2.26434	TRIP12; E3 ubiquitin-protein ligase TRIP12 [EC:2.3.2.26]
Os12g0105975	2.24398	3.24824	2.7424	UBE1, UBA1; ubiquitin-activating enzyme E1 [EC:6.2.1.45]
Os11g0106400	2.02207	2.95281	2.88326	UBE1, UBA1; ubiquitin-activating enzyme E1 [EC:6.2.1.45]
Os01g0271500	2.9988	3.99071	2.96398	UBE1C, UBA3; ubiquitin-activating enzyme E1 C [EC:6.2.1.45]
Os05g0182500	1.41608	1.60012	1.57759	UBE2A, UBC2, RAD6A; ubiquitin-conjugating enzyme E2 A [EC:2.3.2.23]
Os01g0819500	0.456471	9.06874	1021.81	UBE2D, UBC4, UBC5; ubiquitin-conjugating enzyme E2 D [EC:2.3.2.23]
Os02g0120600	1.01526	1.36682	3.73575	UBE2D, UBC4, UBC5; ubiquitin-conjugating enzyme E2 D [EC:2.3.2.23]
Os04g0667800	1.4141	1.33521	2.02635	UBE2D, UBC4, UBC5; ubiquitin-conjugating enzyme E2 D [EC:2.3.2.23]
Os06g0506600	2.43814	1.29216	1.87444	UBE2D, UBC4, UBC5; ubiquitin-conjugating enzyme E2 D [EC:2.3.2.23]
Os02g0261100	3.88458	6.27123	6.31281	UBE2D, UBC4, UBC5; ubiquitin-conjugating enzyme E2 D [EC:2.3.2.23]
Os05g0460200	1.73189	2.63459	2.40993	UBE2G1, UBC7; ubiquitin-conjugating enzyme E2 G1 [EC:2.3.2.23]
Os01g0839700	1.31337	1.90531	2.22843	UBE2G1, UBC7; ubiquitin-conjugating enzyme E2 G1 [EC:2.3.2.23]
Os10g0447100	1.35504	0.921384	0.634338	UBE2H, UBC8; ubiquitin-conjugating enzyme E2 H [EC:2.3.2.23]
Os10g0536000	2.93732	3.89507	3.62023	UBE2I, UBC9; ubiquitin-conjugating enzyme E2 I
Os03g0308000	1.84433	2.23706	2.21527	UBE2J1, NCUBE1, UBC6; ubiquitin-conjugating enzyme E2 J1 [EC:2.3.2.23]
Os06g0193000	1.36374	1.17703	1.22131	UBE2J2, NCUBE2, UBC6; ubiquitin-conjugating enzyme E2 J2 [EC:2.3.2.23]
Os08g0374100	1.69006	2.15607	2.01274	UBE2M, UBC12; ubiquitin-conjugating enzyme E2 M
Os10g0190000	2.06392	2.25275	2.1989	UBE2M, UBC12; ubiquitin-conjugating enzyme E2 M
Os01g0673600	1.93318	2.72526	2.59705	UBE2N, BLU, UBC13; ubiquitin-conjugating enzyme E2 N [EC:2.3.2.23]
Os05g0232500	2.25588	2.59245	2.05263	UBE2O; ubiquitin-conjugating enzyme E2 O [EC:2.3.2.24]
Os05g0557700	1.41669	2.43668	2.19734	UBE2O; ubiquitin-conjugating enzyme E2 O [EC:2.3.2.24]
Os01g0233900	0.62963	2.01455	4.86957	UBE2O; ubiquitin-conjugating enzyme E2 O [EC:2.3.2.24]
Os01g0232500	2.49391	2.55452	1.42198	UBE2O; ubiquitin-conjugating enzyme E2 O [EC:2.3.2.24]
Os03g0681400	2.17462	2.51928	2.78642	UBE2W, UBC16; ubiquitin-conjugating enzyme E2 W [EC:2.3.2.25]
Os03g0683866	1.55498	2.15585	1.83943	UBE3B; ubiquitin-protein ligase E3 B [EC:2.3.2.26]
Os03g0683900	1.33482	1.57854	1.00286	UBE3B; ubiquitin-protein ligase E3 B [EC:2.3.2.26]
Os05g0159000	0.590728	0.957694	1.27358	UBE3C; ubiquitin-protein ligase E3 C [EC:2.3.2.26]
Os03g0427900	1.77286	2.61765	2.8	UBE4B, UFD2; ubiquitin conjugation factor E4 B [EC:2.3.2.27]

## Sheet: vesicular transport
SNARE interactions in vesicular transport
Differentially expressed genes	FPKM(zj-es/ZJ22)			desc
	a	b	c
Os01g0254900	1.21514	2.12695	2.07594	Similar to Syntaxin 22 (AtSYP22) (AtVAM3)
Os01g0964000	1.29024	2.5309	2.33746	Similar to VAMP-like protein YKT61 (AtYKT61) (Geranylgeranylated protein 1) (AtGP1)
Os02g0119400	1.05734	1.14986	1.15969	Similar to Syntaxin 52 (AtSYP52)
Os02g0658900	1.55448	4.92966	1.52592	Sec20 family protein
Os02g0820700	1.63792	1.90354	1.7605	Similar to BS14b
Os03g0791500	3.45714	16.5578	4.46465	Similar to 25.3 kDa vesicle transport protein
Os03g0803000	1.94805	2.07814	2.07163	Synaptobrevin domain containing protein
Os04g0530400	1.5316	1.61728	1.48065	t-snare domain containing protein
Os06g0168500	8.42017	15.9355	45.4727	Similar to Syntaxin-like protein (Fragment)
Os06g0174400	1.34846	1.29295	1.59217	Similar to Vesicle-associated membrane protein 712 (AtVAMP712)
Os07g0164300	1.27322	2.81132	2.99231	Similar to syntaxin 132
Os07g0577900	1.84091	4.76419	2.58333	Target SNARE coiled-coil region domain containing protein
Os08g0277900	1.32516	3.16813	4.47752	Similar to Syntaxin 52 (AtSYP52)
Os08g0440000	2.01937	2.78844	3.27925	Vesicle transport v-SNARE family protein
Os09g0416700	1.09969	1.29545	1.16924	Vesicle transport v-SNARE family protein
Os10g0154000	2.7546	1.99093	1.83271	Membrane-trafficking protein, Intracellular SNARE protein, Resistance to rice blast diseas
Os12g0639800	1.2355	38.36	11.2371	Similar to CDS_VAMP
